# Supplementary material for: Profiling chromatin accessibility in formalin-fixed paraffin-embedded samples
Source: HighWire-hosted journal article supplement (doi:10.1101/gr.275269.121), 2021-07-14
Supplement: Supplemental_Table_S1.xlsx [file Supplemental_Table_S1.xlsx]

## Sheet: Supplemental_Table_S1
	chr	start	end		baseMean	log2FoldChange	lfcSE	stat	pvalue	padj	readcounts (standard ATAC in FFPE liver)	readcounts (standard ATAC-Seq in frozen liver)	Group
peak_46456	chr2	98506318	98507584	1266	5003.98003195879	6.23238136983086	0.164826434434106	37.8117829899575	0	0	1765	173219	standard ATAC-Seq in frozen liver
peak_16278	chr12	3109733	3110253	520	2565.86392338131	6.44090285678333	0.181047967706311	35.5756705716328	3.33229260150024e-277	1.4581945809535e-272	322	36598.5	standard ATAC-Seq in frozen liver
peak_385	chr1	24618420	24622977	4557	1691.78758123793	4.83274336903545	0.138081437397622	34.9992255303586	2.31169048957485e-268	6.74389466523671e-264	5570	205970.5	standard ATAC-Seq in frozen liver
peak_46453	chr2	98502326	98503186	860	1662.68714374358	5.37578128619106	0.157004836651561	34.2395903262616	6.23121245056746e-257	1.36337370615303e-252	715	38677	standard ATAC-Seq in frozen liver
peak_81353	chr9	35112672	35113321	649	1670.56659407782	6.4194025212391	0.196063265443497	32.7414852890385	4.01365553818151e-235	7.02542238092215e-231	264	29676.5	standard ATAC-Seq in frozen liver
peak_46455	chr2	98505097	98505419	322	1156.77342449814	5.42386106305862	0.176697652907544	30.6957165180718	6.49241768782261e-207	9.47016506034244e-203	180.5	10089.5	standard ATAC-Seq in frozen liver
peak_68632	chr6	103598929	103599440	511	914.225186669083	5.7492838530933	0.207698160021289	27.6809570797546	1.18384342694336e-168	1.48012561260938e-164	182	12714.5	standard ATAC-Seq in frozen liver
peak_80590	chr9	3023339	3023758	419	1136.19705136185	7.07890417005131	0.275845887774514	25.6625328989419	3.06395002821657e-145	3.35192303149357e-141	75	13100.5	standard ATAC-Seq in frozen liver
peak_80591	chr9	3024055	3024695	640	1588.21460321657	8.39847546320373	0.355957114412866	23.5940654734675	4.43456140741507e-123	4.312315331284e-119	64	28089	standard ATAC-Seq in frozen liver
peak_80577	chr9	3001936	3002382	446	860.481216194562	6.86874437116199	0.291835585997853	23.5363495773696	1.73216340734509e-122	1.51597209247435e-118	68	10551	standard ATAC-Seq in frozen liver
peak_5870	chr1	197067562	197068268	706	450.833666895707	4.42329435048175	0.19365378856107	22.8412487220039	1.78549746317089e-115	1.42059047708412e-111	304	8416	standard ATAC-Seq in frozen liver
peak_80592	chr9	3025352	3025946	594	733.228849492376	6.63568091443265	0.291739821988138	22.7452010809222	1.60086685180607e-114	1.16755221669346e-110	92	11957	standard ATAC-Seq in frozen liver
peak_10705	chr11	3023617	3024368	751	356.331272546753	3.66298354229084	0.17956564595031	20.3991332690913	1.7020558904249e-92	1.1458633036469e-88	417	6852.5	standard ATAC-Seq in frozen liver
peak_49800	chr2	181747301	181748117	816	432.917521597185	5.81389881492556	0.287128373889861	20.2484301226033	3.66742321636715e-91	2.29263723195169e-87	132	9602	standard ATAC-Seq in frozen liver
peak_80581	chr9	3006656	3006907	251	1422.51893881736	8.95120650105466	0.447077224861222	20.0216114874409	3.56986273665638e-89	2.08287211232953e-85	15	9874.5	standard ATAC-Seq in frozen liver
peak_80576	chr9	3000017	3001595	1578	1012.33179585495	8.59718407565338	0.467128304069356	18.404331317027	1.21272289402963e-75	6.6335184351612e-72	88	44150.5	standard ATAC-Seq in frozen liver
peak_80580	chr9	3004534	3004794	260	990.889664690088	8.71865586208785	0.490745293411486	17.7661527866704	1.29257212001013e-70	6.65438937477448e-67	14	7117	standard ATAC-Seq in frozen liver
peak_29203	chr15	74915840	74917559	1719	232.580100462004	3.36343125737653	0.202798406314055	16.585097084875	8.93212381143454e-62	4.34294746584967e-58	759	10091.5	standard ATAC-Seq in frozen liver
peak_80587	chr9	3017857	3018098	241	1082.67961550542	9.43267134190319	0.59771238196879	15.7812881687897	4.18557894843697e-56	1.9279878104645e-52	8	7220	standard ATAC-Seq in frozen liver
peak_46454	chr2	98503866	98504234	368	331.55222121395	6.71380369154755	0.430948624237326	15.5791277984223	1.00922385701384e-54	4.41631313709972e-51	23	3347	standard ATAC-Seq in frozen liver
peak_87124	chrX	139917391	139917813	422	184.126437386162	3.25416861130041	0.218857515259668	14.8688913306881	5.24751309190539e-50	2.18693856328794e-46	157	1946.5	standard ATAC-Seq in frozen liver
peak_80586	chr9	3016970	3017219	249	1042.97611979879	9.64217414997789	0.653237065050517	14.760604787838	2.62912552699095e-49	1.04590198634873e-45	8	7187.5	standard ATAC-Seq in frozen liver
peak_35890	chr17	36368040	36368700	660	176.086995120363	3.23093275561336	0.223695762454254	14.4434240513344	2.75793491963703e-47	1.04944220100745e-43	237	2898.5	standard ATAC-Seq in frozen liver
peak_87498	chrX	166649836	166650392	556	164.620591678789	4.86130489721686	0.342263433260055	14.2034013125883	8.72716046969291e-46	3.18246815477939e-42	65	2446	standard ATAC-Seq in frozen liver
peak_85310	chrUn_random	5813077	5813464	387	400.893318136325	7.77256230075311	0.555421279509339	13.9939944461966	1.69611674862114e-44	5.93769766890293e-41	15	4274.5	standard ATAC-Seq in frozen liver
peak_80593	chr9	3032103	3032764	661	677.257003950344	9.01821549892977	0.654241411054351	13.7842321604136	3.17122730477611e-43	1.06747170187193e-39	18.5	12394	standard ATAC-Seq in frozen liver
peak_40447	chr18	90771301	90772110	809	657.633707514076	8.97574300522521	0.65251416209912	13.7556294201347	4.71162219956274e-43	1.52724616030938e-39	22	14690.5	standard ATAC-Seq in frozen liver
peak_85270	chrUn_random	5249066	5249760	694	236.908961021842	6.48962134562711	0.472569179912198	13.7326377205404	6.47331817647178e-43	2.02335119102369e-39	37	4506	standard ATAC-Seq in frozen liver
peak_80588	chr9	3018337	3018693	356	921.607840716431	9.78573130540989	0.728854814417984	13.4261736519147	4.24800460766026e-41	1.23927038419273e-37	8	9085.5	standard ATAC-Seq in frozen liver
peak_6158	chr10	11211764	11212129	365	153.16354224631	5.356189939762	0.409587833250159	13.0770240347707	4.4554458313572e-39	1.21855051160797e-35	29	1507.5	standard ATAC-Seq in frozen liver
peak_43193	chr1_random	272410	272996	586	125.909437991785	3.50862653496832	0.275383185498395	12.7408887678394	3.50380390921672e-37	9.29240649487086e-34	127	1880	standard ATAC-Seq in frozen liver
peak_85295	chrUn_random	5495437	5497270	1833	227.896588187562	6.95265127402187	0.558914948852988	12.4395514707384	1.59396455700587e-35	4.1030054136646e-32	72	11476	standard ATAC-Seq in frozen liver
peak_80579	chr9	3004027	3004279	252	969.415216446942	10.2742224826732	0.838922355052509	12.246928956888	1.74478714803152e-34	4.36291504024486e-31	4	6761.5	standard ATAC-Seq in frozen liver
peak_38964	chr18	40467600	40468103	503	169.47726920302	6.32653513848516	0.528309412802366	11.9750566338136	4.8010965151803e-33	1.16718657197796e-29	22	2335.5	standard ATAC-Seq in frozen liver
peak_37762	chr18	3004722	3006114	1392	110.357963128621	5.36905681035014	0.482254709195052	11.13323873874	8.64367279914513e-29	1.93970666591893e-25	77	4154.5	standard ATAC-Seq in frozen liver
peak_82187	chr9	56071280	56071879	599	138.658121234478	6.22823887148645	0.564168746424855	11.0396736986139	2.45924596169229e-28	5.38076868303368e-25	26	2265	standard ATAC-Seq in frozen liver
peak_66625	chr6	47702708	47703421	713	157.18740172235	6.63627799495902	0.604626166885963	10.9758365721057	4.9941416068395e-28	1.06605433972924e-24	23.5	3066	standard ATAC-Seq in frozen liver
peak_80597	chr9	3037739	3038294	555	462.375101670296	9.20477605538896	0.840341919840066	10.9536080945966	6.38524271081521e-28	1.33054775430437e-24	9	7106	standard ATAC-Seq in frozen liver
peak_20084	chr13	9010868	9011225	357	82.6616326197462	3.89278573793077	0.367533582244941	10.5916463854899	3.25810355270965e-26	6.63130150766502e-23	41	764	standard ATAC-Seq in frozen liver
peak_66626	chr6	47707462	47708118	656	84.5090277960865	3.45965121561038	0.328010849003307	10.5473682535894	5.22398606527712e-26	1.01599563654886e-22	96	1402.5	standard ATAC-Seq in frozen liver
peak_46528	chr2	102492264	102492469	205	84.2147929911338	4.35968912962643	0.4134876093857	10.543699570837	5.43191010037455e-26	1.03346813059713e-22	17.5	457	standard ATAC-Seq in frozen liver
peak_80585	chr9	3015231	3015462	231	852.707003757372	10.6743793104149	1.02498819007976	10.4141485860283	2.13701131043738e-25	3.89643943496186e-22	2	5452	standard ATAC-Seq in frozen liver
peak_43844	chr2	22442926	22443919	993	199.124362802234	7.56939286360921	0.732819802100118	10.3291325397005	5.20289598669429e-25	9.29290313998975e-22	19	5431.5	standard ATAC-Seq in frozen liver
peak_80599	chr9	3258483	3259062	579	82.8858117133154	4.94429156215073	0.488295589169168	10.1256117643074	4.25310680187075e-24	7.29858145476325e-21	33	1287	standard ATAC-Seq in frozen liver
peak_85108	chrM	12642	16232	3590	2259.56160033995	14.5238571481969	1.44639561574243	10.041413974241	1.0022700888415e-23	1.68687838279461e-20	0	224338	standard ATAC-Seq in frozen liver
peak_85107	chrM	62	3412	3350	2201.27786019159	14.486157434052	1.44635917835225	10.0156016920743	1.30167418400681e-23	2.14945703603947e-20	0	203855	standard ATAC-Seq in frozen liver
peak_80595	chr9	3035684	3036417	733	258.298147215913	8.36294012389558	0.841141591839826	9.94236904348451	2.72273535500005e-23	4.33256500971363e-20	13	5220.5	standard ATAC-Seq in frozen liver
peak_45213	chr2	57481785	57482266	481	91.4903186299387	5.61846874396571	0.570263045381538	9.85241598498923	6.69157735043773e-23	1.045785996666e-19	21	1192.5	standard ATAC-Seq in frozen liver
peak_71976	chr7	46586185	46586753	568	74.4865971452298	3.09144035528714	0.320991578082613	9.63090799376519	5.92039899829505e-22	9.09030526196113e-19	95	1048	standard ATAC-Seq in frozen liver
peak_10706	chr11	3025326	3025703	377	92.6472704420177	5.86329857135072	0.612076527590696	9.57935536987556	9.76525120146961e-22	1.47352589638176e-18	14	949	standard ATAC-Seq in frozen liver
peak_46530	chr2	102498835	102499390	555	72.7748262983475	4.90742170643291	0.51533806365446	9.52272314533202	1.68699331882254e-21	2.4607328045005e-18	27	1080	standard ATAC-Seq in frozen liver
peak_80589	chr9	3020833	3021139	306	1184.42617784777	13.5919866648798	1.44637397257181	9.39728377489519	5.5989766575589e-21	7.77804504909361e-18	0	10045	standard ATAC-Seq in frozen liver
peak_46529	chr2	102498246	102498624	378	66.7063441151581	4.61929556580898	0.496426773802256	9.30508951084297	1.33879519510584e-20	1.80261564123797e-17	21.5	671	standard ATAC-Seq in frozen liver
peak_80584	chr9	3014041	3014370	329	1065.64410538476	13.439521169973	1.44640849595545	9.29164977083136	1.51915082064885e-20	2.0144630404904e-17	0	9718.5	standard ATAC-Seq in frozen liver
peak_49794	chr2	181652023	181652832	809	76.0178089586599	5.34518409074136	0.575882196193894	9.28173179526753	1.66745950847541e-20	2.17812520480984e-17	31	1662	standard ATAC-Seq in frozen liver
peak_22567	chr13	74665952	74668181	2229	94.0210851917836	6.15218402319739	0.665969995775582	9.23792972990115	2.51312466318706e-20	3.18762546952853e-17	60	5699.5	standard ATAC-Seq in frozen liver
peak_70487	chr6	145881190	145881657	467	66.8949460773272	4.78185230888014	0.517872940223372	9.23364002532668	2.61587805422717e-20	3.27055759182726e-17	23	835	standard ATAC-Seq in frozen liver
peak_86347	chrX	72989746	72990670	924	62.3538125301025	3.90169090387952	0.422692672236999	9.23056196652466	2.69215711736258e-20	3.31851970076698e-17	74	1495.5	standard ATAC-Seq in frozen liver
peak_80578	chr9	3003301	3003689	388	864.921222935559	13.1384305762233	1.44645360523601	9.08320220480182	1.05426511840295e-19	1.19828868698062e-16	1	9302.5	standard ATAC-Seq in frozen liver
peak_43821	chr2	20821343	20821947	604	71.5079560894776	5.48258535525837	0.617779435874253	8.87466470537283	7.01444102600581e-19	7.67371080193753e-16	20	1168	standard ATAC-Seq in frozen liver
peak_66631	chr6	47721789	47722572	783	70.3346569245369	5.45805290969245	0.618422051089108	8.8257734343079	1.08705900918295e-18	1.17454712869979e-15	26.5	1488	standard ATAC-Seq in frozen liver
peak_10720	chr11	3080056	3080265	209	77.5953382927142	5.87082842550429	0.669573201452143	8.76801582376934	1.81842283145363e-18	1.94081155836574e-15	6	441.5	standard ATAC-Seq in frozen liver
peak_12201	chr11	53953457	53954279	822	91.2043002920997	6.43370036951081	0.741739188638617	8.67380403793842	4.17919267147844e-18	4.30304427547202e-15	16	2055	standard ATAC-Seq in frozen liver
peak_66622	chr6	47689674	47690737	1063	87.1949697007339	6.36816578763447	0.741195661202286	8.59174725511039	8.56566456873491e-18	8.42312806057427e-15	21.5	2534	standard ATAC-Seq in frozen liver
peak_6566	chr10	21862016	21862977	961	59.1030334035532	4.97197931088472	0.582533406331241	8.53509731261239	1.4003751232339e-17	1.3468069275858e-14	36	1523.5	standard ATAC-Seq in frozen liver
peak_86345	chrX	72979849	72980996	1147	54.6907027127965	3.41324484379847	0.401550471615123	8.50016395216684	1.89323108537597e-17	1.80101838435891e-14	113	1587.5	standard ATAC-Seq in frozen liver
peak_80583	chr9	3012764	3013373	609	474.217301954902	12.2714085813598	1.44646374682961	8.4837304828804	2.18086587383711e-17	2.05233548830484e-14	0	8001	standard ATAC-Seq in frozen liver
peak_80582	chr9	3009310	3009918	608	455.448413177555	12.2131413630119	1.44660444436444	8.44262673918279	3.10284700797371e-17	2.77100068664134e-14	0	7674.5	standard ATAC-Seq in frozen liver
peak_43845	chr2	22444054	22445766	1712	195.074211280417	8.54346964007899	1.02861538903466	8.3057960547303	9.91524163670157e-17	8.1865286113442e-14	15.5	9180	standard ATAC-Seq in frozen liver
peak_87493	chrX	166527082	166527610	528	348.134042579221	11.8255115234382	1.44679632053171	8.17358418432545	2.99360306721451e-16	2.42589950777358e-13	1	5088.5	standard ATAC-Seq in frozen liver
peak_18837	chr12	98299503	98300134	631	336.351263772882	11.7758789144392	1.44682299101678	8.13912896570955	3.9813171642402e-16	3.16764451724671e-13	0	5866.5	standard ATAC-Seq in frozen liver
peak_46531	chr2	102499504	102500398	894	52.066290425007	4.78266099307708	0.58800565347712	8.13369899557127	4.16385685582111e-16	3.28303232580728e-13	31.5	1241.5	standard ATAC-Seq in frozen liver
peak_10724	chr11	3096593	3096837	244	49.0852880861908	4.31545693891753	0.537791709462956	8.02440213001236	1.02021588825107e-15	7.69726502791769e-13	12.5	317	standard ATAC-Seq in frozen liver
peak_76371	chr8	19853146	19854018	872	48.3248446590039	4.47045433621713	0.558756540073641	8.0007194826354	1.23694295544375e-15	9.25265047157958e-13	38.5	1112	standard ATAC-Seq in frozen liver
peak_19965	chr13	3372014	3373027	1013	84.3708674573351	6.73946843580493	0.851772288003159	7.91228891891343	2.52699095993924e-15	1.79804651888555e-12	16	2347.5	standard ATAC-Seq in frozen liver
peak_33738	chr16	91534734	91535094	360	45.7658171216412	4.20969432958532	0.53591565909975	7.85514335717847	3.99315159616435e-15	2.79581307635766e-12	17	432	standard ATAC-Seq in frozen liver
peak_80594	chr9	3034751	3035355	604	639.076963678998	11.2585666369106	1.44470077162548	7.79300936085419	6.54317719407715e-15	4.33827518824574e-12	3	10697	standard ATAC-Seq in frozen liver
peak_10718	chr11	3068701	3069037	336	76.6169811550562	6.59904659275482	0.852768924592485	7.7383760154116	1.00694676541038e-14	6.57663984790682e-12	6.5	706.5	standard ATAC-Seq in frozen liver
peak_46527	chr2	102489414	102491317	1903	45.4926896850597	4.58053317865981	0.594925229144391	7.69934263041331	1.36767991977971e-14	8.86651695549632e-12	76	2299.5	standard ATAC-Seq in frozen liver
peak_80596	chr9	3037061	3037547	486	208.218980268419	11.0839734933671	1.44807695558371	7.6542710320939	1.9441186640876e-14	1.24195125081958e-11	0	2798	standard ATAC-Seq in frozen liver
peak_85176	chrUn_random	3632182	3632583	401	202.142460915054	11.0411974175578	1.44853517526125	7.62231915808769	2.4915805218205e-14	1.55757596920863e-11	0	2246.5	standard ATAC-Seq in frozen liver
peak_49845	chr3	8245691	8246620	929	46.1682611311402	4.83365631255198	0.634355448650532	7.61979158976981	2.54085618633103e-14	1.56600839839089e-11	31	1146	standard ATAC-Seq in frozen liver
peak_75183	chr7	137977808	137978236	428	42.4728944671776	4.09618854627787	0.541708100317723	7.56161582940217	3.98092689525698e-14	2.41949125656942e-11	21	472.5	standard ATAC-Seq in frozen liver
peak_46532	chr2	102501191	102501960	769	44.7623245137457	4.78723049241047	0.635721714460635	7.53038693427689	5.05901813670241e-14	3.01197420616366e-11	29	920	standard ATAC-Seq in frozen liver
peak_81087	chr9	24346313	24346756	443	109.441942203479	7.70648899686955	1.0319690333872	7.46775217815868	8.15762906622946e-14	4.72812939236646e-11	4	1333	standard ATAC-Seq in frozen liver
peak_66624	chr6	47698498	47699074	576	172.06026007471	10.8088035485825	1.44874886844233	7.46078480820762	8.60086240873419e-14	4.95222945493426e-11	1	2743	standard ATAC-Seq in frozen liver
peak_66628	chr6	47713130	47713771	641	160.564612620475	10.7090275907608	1.44906718486933	7.39029059699985	1.46508262059008e-13	8.16704241219256e-11	0.5	2849	standard ATAC-Seq in frozen liver
peak_86839	chrX	109484249	109484907	658	42.9090213603517	3.21494808752924	0.436365220092377	7.3675626275821	1.73775807556691e-13	9.50542806347127e-11	58	708.5	standard ATAC-Seq in frozen liver
peak_76386	chr8	19927579	19927779	200	40.6697140780605	3.7205339314391	0.506175263660542	7.35028793096893	1.97780342117692e-13	1.0751265690558e-10	13	210	standard ATAC-Seq in frozen liver
peak_80537	chr8_random	676759	677348	589	40.5583984017913	4.40760551949875	0.600724878902876	7.33714496317934	2.18198240947411e-13	1.1715639171458e-10	24	631	standard ATAC-Seq in frozen liver
peak_76388	chr8	19929840	19930205	365	39.1779282009582	4.1523638980105	0.571259083400063	7.26879277489321	3.62714313782416e-13	1.86731729576019e-10	17	374.5	standard ATAC-Seq in frozen liver
peak_16276	chr11	121843553	121843962	409	133.561192561681	10.4433993665829	1.44992193260908	7.20273218282202	5.90178244397673e-13	2.95153198693943e-10	0	1511	standard ATAC-Seq in frozen liver
peak_66614	chr6	47609209	47610175	966	46.5808749771231	5.44819075329883	0.7580115751187	7.18747698865374	6.59995210853425e-13	3.26339665868254e-10	20	1214	standard ATAC-Seq in frozen liver
peak_22636	chr13	77578023	77578444	421	129.338786430557	10.3970444545317	1.450094080008	7.1699102822862	7.50469317492937e-13	3.66929185461812e-10	1	1506	standard ATAC-Seq in frozen liver
peak_17689	chr12	70754924	70755397	473	55.9604444479928	6.14022833229349	0.860207207715397	7.13808054294404	9.46431737213575e-13	4.50167169615189e-10	7	723	standard ATAC-Seq in frozen liver
peak_56598	chr4	88440000	88440495	495	40.7334475700552	4.91883903460108	0.692421312706094	7.10382384877418	1.21351511948817e-12	5.64923562460029e-10	14	539	standard ATAC-Seq in frozen liver
peak_34556	chr17	13498724	13499239	515	84.788650420354	7.33628578750656	1.03454442077966	7.09132023734442	1.32838550897754e-12	6.1512683259368e-10	5	1199.5	standard ATAC-Seq in frozen liver
peak_85101	chr9_random	241925	243677	1752	113.86874037191	10.2131777276503	1.45125067463872	7.03750076132974	1.95718467329294e-12	8.69496677268654e-10	6	5533.5	standard ATAC-Seq in frozen liver
peak_66623	chr6	47694070	47695341	1271	113.149868822376	10.2040942241247	1.45092606904799	7.03281472557729	2.02408065252981e-12	8.90433953597362e-10	5.5	3978.5	standard ATAC-Seq in frozen liver
peak_76392	chr8	19974830	19975091	261	37.1438230248191	3.57935026672949	0.511440804803181	6.9985621661669	2.58602613707212e-12	1.10403132434349e-09	16	248.5	standard ATAC-Seq in frozen liver
peak_33892	chr16	93789322	93789741	419	49.3585671721576	5.95663305552795	0.864100539687452	6.89344906286308	5.44556240807016e-12	2.22705689902753e-09	7	561.5	standard ATAC-Seq in frozen liver
peak_42530	chr19	45724330	45724829	499	35.8749092041935	4.22155065913576	0.61257675743494	6.89146398046962	5.52211051323251e-12	2.24785855817487e-09	18	473	standard ATAC-Seq in frozen liver
peak_45603	chr2	69193457	69193863	406	97.6323152614703	9.99140018540141	1.45207306317471	6.88078337019553	5.9524312046346e-12	2.40069505344892e-09	2	1094	standard ATAC-Seq in frozen liver
peak_26755	chr14	86598674	86599083	409	95.3115298548445	9.9565682758705	1.45211258892909	6.85660902038823	7.05142726342753e-12	2.8155023229619e-09	1	1079.5	standard ATAC-Seq in frozen liver
peak_66630	chr6	47717671	47718141	470	93.185655354761	9.92408961497737	1.45217006876358	6.83397201777269	8.25951425081088e-12	3.22707333802106e-09	0	1211.5	standard ATAC-Seq in frozen liver
peak_65593	chr6	9839809	9840295	486	69.9787901731578	7.05758395494415	1.03865337306153	6.794936730568	1.08360073178402e-11	4.15945844057042e-09	6	928.5	standard ATAC-Seq in frozen liver
peak_87487	chrX	166443060	166443710	650	65.78991874951	6.96759865162988	1.03882197065502	6.70721148421279	1.98378661393291e-11	7.29491683465523e-09	6	1175.5	standard ATAC-Seq in frozen liver
peak_51145	chr3	61962949	61963424	475	43.9719074456091	5.78714598036478	0.866874871557345	6.67587234356919	2.45765831867097e-11	8.88809084263489e-09	8	569.5	standard ATAC-Seq in frozen liver
peak_65182	chr5	148422913	148423256	343	64.3843130784394	6.93616843617672	1.0394840628272	6.67270301125318	2.5113429000373e-11	9.04486499046768e-09	2	607	standard ATAC-Seq in frozen liver
peak_76350	chr8	19703013	19703511	498	32.8369649134648	3.8821975504469	0.584449311242305	6.64248802380296	3.08431733010837e-11	1.10178109556634e-08	22.5	426	standard ATAC-Seq in frozen liver
peak_61462	chr5	60433961	60434437	476	74.8708632464965	9.60842646676208	1.4542258851819	6.60724483360455	3.91538225276356e-11	1.35974050899856e-08	0	984	standard ATAC-Seq in frozen liver
peak_66617	chr6	47622146	47623281	1135	33.925481151852	4.64543655978887	0.703156060581797	6.60655126252513	3.93376096526653e-11	1.35974050899856e-08	31	1021.5	standard ATAC-Seq in frozen liver
peak_59865	chr4	152527042	152527447	405	40.9207413072991	5.68123263103841	0.86968083391545	6.53254896449833	6.46596472215598e-11	2.11945605437592e-08	7	448.5	standard ATAC-Seq in frozen liver
peak_80314	chr8	128302858	128303194	336	35.0869557486895	5.02860526636255	0.77222355718369	6.51185167764363	7.42299983980461e-11	2.3884320697789e-08	7	316.5	standard ATAC-Seq in frozen liver
peak_49844	chr3	8245243	8245553	310	40.454400069237	5.66455685907701	0.870307803542988	6.50868214213043	7.58129468850487e-11	2.4215595979681e-08	4	342	standard ATAC-Seq in frozen liver
peak_87483	chrX	166432426	166433021	595	53.5743334125853	6.66887216815075	1.0428651615739	6.394759757902	1.60799973543678e-10	4.75440975830038e-08	5	872.5	standard ATAC-Seq in frozen liver
peak_50461	chr3	35579298	35579975	677	61.0432521498094	9.31370144119423	1.45704169630347	6.39219966375926	1.63516184830261e-10	4.8030820814634e-08	0	1147	standard ATAC-Seq in frozen liver
peak_34570	chr17	13743523	13746046	2523	158.939260398208	9.24934112785418	1.44738440502467	6.3903832981374	1.6547044982005e-10	4.84341414642172e-08	15	11072	standard ATAC-Seq in frozen liver
peak_30135	chr15	86025064	86025795	731	30.6430748405664	4.49210615611816	0.709827663279002	6.32844616870406	2.4764221882608e-10	7.0597392017719e-08	19	589	standard ATAC-Seq in frozen liver
peak_66033	chr6	29697744	29699060	1316	57.0381133968782	9.21590933648696	1.45765220354884	6.3224336464142	2.57475597400007e-10	7.29255883781592e-08	4	2071.5	standard ATAC-Seq in frozen liver
peak_31601	chr16	18533152	18533559	407	56.5644548151013	9.20391397836487	1.45786974987789	6.31326219584142	2.73214022074795e-10	7.68855884178906e-08	0	635	standard ATAC-Seq in frozen liver
peak_80563	chr8_random	818090	818540	450	32.2715525681136	4.9040447782717	0.777693790021299	6.30588136512881	2.86558474446566e-10	7.98704175958249e-08	8.5	387.5	standard ATAC-Seq in frozen liver
peak_80538	chr8_random	679992	680267	275	55.6408914026768	9.180034777524	1.45830521125204	6.2950023813207	3.07395140695303e-10	8.51358079699754e-08	0	424	standard ATAC-Seq in frozen liver
peak_76383	chr8	19920794	19921016	222	36.4726841211116	5.51161550476464	0.875918170210432	6.29238631211467	3.12622279828931e-10	8.6310376367029e-08	3	219.5	standard ATAC-Seq in frozen liver
peak_56602	chr4	88451375	88452226	851	31.793702147902	4.88191911393142	0.777085222039521	6.28234712933858	3.33499150052606e-10	9.09268290138754e-08	21	726	standard ATAC-Seq in frozen liver
peak_56596	chr4	88433871	88434691	820	29.7927851725458	3.7314135022557	0.594047478027185	6.28133884962801	3.35669625107835e-10	9.09519192563858e-08	38	634	standard ATAC-Seq in frozen liver
peak_78253	chr8	86280629	86281010	381	139.468267425065	9.06043871163223	1.44808755183542	6.25683074213872	3.92879397618436e-10	1.04508582265959e-07	3	1468	standard ATAC-Seq in frozen liver
peak_55003	chr4	34882904	34883234	330	31.5719119849499	4.87098624572793	0.780230437793131	6.24300976965911	4.29230080154852e-10	1.11802938646049e-07	7	278.5	standard ATAC-Seq in frozen liver
peak_49795	chr2	181653185	181653915	730	52.3476378018893	9.09207134200277	1.45909598694636	6.23130446752236	4.62567093978253e-10	1.19420087014403e-07	0	1061	standard ATAC-Seq in frozen liver
peak_87486	chrX	166440496	166441048	552	51.4184852715521	9.06614663422028	1.45991177637662	6.21006473193999	5.29627799161792e-10	1.33196825732301e-07	0	788.5	standard ATAC-Seq in frozen liver
peak_76384	chr8	19924219	19925023	804	47.004262618425	6.47794382225274	1.04620445552184	6.19185264224629	5.94611295189435e-10	1.47840300976376e-07	9	1032	standard ATAC-Seq in frozen liver
peak_4613	chr1	169270258	169270772	514	28.8454680089919	3.6813633026217	0.594825893467636	6.18897620808095	6.05562214005767e-10	1.49835291133659e-07	20.5	378.5	standard ATAC-Seq in frozen liver
peak_30986	chr16	3116155	3116729	574	49.2981998893814	9.00546107053032	1.46025773848337	6.16703533438107	6.95822133532831e-10	1.71060835125449e-07	0	782.5	standard ATAC-Seq in frozen liver
peak_86348	chrX	72994917	72995403	486	49.0599733190147	8.99850576597637	1.46027659109362	6.16219271120225	7.17444627669651e-10	1.75792160703804e-07	0	658	standard ATAC-Seq in frozen liver
peak_38059	chr18	11288492	11288957	465	49.0641651574493	8.99858903491	1.46037578356289	6.16183117810684	7.19084924781613e-10	1.75792160703804e-07	1	631.5	standard ATAC-Seq in frozen liver
peak_49799	chr2	181665970	181666471	501	33.9010966288152	5.4035776865124	0.884263140744121	6.11082542914229	9.91171406963943e-10	2.34449541529939e-07	7.5	463.5	standard ATAC-Seq in frozen liver
peak_66616	chr6	47617839	47618294	455	44.3583194882002	8.85323671608693	1.46250816567672	6.05346139177995	1.41766061623015e-09	3.20600101994436e-07	0	558	standard ATAC-Seq in frozen liver
peak_76385	chr8	19926412	19927080	668	43.9000309806835	8.83813669573915	1.46270959275348	6.04230445983592	1.51928424341502e-09	3.40983934612394e-07	1.5	811.5	standard ATAC-Seq in frozen liver
peak_66612	chr6	47604839	47605292	453	43.890250024336	8.83791855383796	1.46267862790992	6.04228323652122	1.51948416342547e-09	3.40983934612394e-07	2	548.5	standard ATAC-Seq in frozen liver
peak_18824	chr12	94815358	94815743	385	43.9112092165091	8.8383940849861	1.46386050681866	6.03772971797304	1.56297569561743e-09	3.48954259961077e-07	0	468	standard ATAC-Seq in frozen liver
peak_71963	chr7	46449078	46449341	263	43.1951322259308	8.81479019407963	1.46304502736148	6.02496165820446	1.69149718103781e-09	3.73833691381939e-07	0	316	standard ATAC-Seq in frozen liver
peak_5772	chr1	195053785	195054235	450	29.1608292158732	3.19634498712914	0.531182003306661	6.01741957978918	1.77219306755884e-09	3.89699912260507e-07	28	326.5	standard ATAC-Seq in frozen liver
peak_56594	chr4	88428000	88428770	770	31.5314064404521	5.2967592476948	0.882173936831175	6.00421189807658	1.92263474647832e-09	4.18574801932926e-07	13	655.5	standard ATAC-Seq in frozen liver
peak_87504	chrY	2652085	2652445	360	42.015177609923	8.77490017106882	1.46360032751615	5.99542102177617	2.02958917014861e-09	4.34297346166837e-07	0	418	standard ATAC-Seq in frozen liver
peak_85317	chrUn_random	5890177	5890537	360	41.7825401574692	8.76686668914606	1.46371720653026	5.98945387130341	2.10546836287487e-09	4.49435330854746e-07	1	418	standard ATAC-Seq in frozen liver
peak_46306	chr2	91933647	91934087	440	41.5485054255371	8.75875529922877	1.46385636677161	5.98334337852102	2.18603235927616e-09	4.65497241001193e-07	0	507	standard ATAC-Seq in frozen liver
peak_87485	chrX	166437834	166438057	223	41.3270462089089	8.75090304081097	1.46509101204798	5.97294159123843	2.33013343188742e-09	4.92586830496027e-07	0	255.5	standard ATAC-Seq in frozen liver
peak_31001	chr16	3349860	3350515	655	40.6095719388524	8.7257784450079	1.46441118377706	5.95855763850565	2.54473896530857e-09	5.32193506083681e-07	0	734.5	standard ATAC-Seq in frozen liver
peak_66619	chr6	47630808	47631276	468	40.5997909825049	8.72554055540548	1.46483310235954	5.95667898366744	2.57415169594835e-09	5.36398053042152e-07	0	524	standard ATAC-Seq in frozen liver
peak_35473	chr17	31707238	31707594	356	31.0507614612841	5.2741797076136	0.885819343382407	5.95401279845019	2.61646328599457e-09	5.41348109519998e-07	6	294.5	standard ATAC-Seq in frozen liver
peak_40427	chr18	85867179	85867779	600	40.3797290453549	8.71753443948315	1.46474343617179	5.95157774679436	2.65569812818338e-09	5.4816991622755e-07	1	670.5	standard ATAC-Seq in frozen liver
peak_86365	chrX	73843846	73844565	719	103.095074412119	8.62347414958727	1.45023767024295	5.94624889873576	2.74356873920989e-09	5.62328788025551e-07	6	2052	standard ATAC-Seq in frozen liver
peak_57849	chr4	122132355	122132748	393	39.8976867867087	8.7003516776648	1.46509784897018	5.938409972945	2.87799617980458e-09	5.88503148739059e-07	0	431	standard ATAC-Seq in frozen liver
peak_57848	chr4	121870725	121871111	386	39.8948922277523	8.70028153999731	1.4653590693929	5.93730350582392	2.89747985740374e-09	5.89731487535157e-07	0	423.5	standard ATAC-Seq in frozen liver
peak_76396	chr8	19991106	19991345	239	27.3327385000867	4.65547451984344	0.787838765778458	5.90917167581033	3.43832231375742e-09	6.96570672633647e-07	5.5	173.5	standard ATAC-Seq in frozen liver
peak_76390	chr8	19968209	19969351	1142	39.2573627135371	6.21491639612358	1.05197043584047	5.90788123352364	3.46535696498455e-09	7.00426273021901e-07	9	1221	standard ATAC-Seq in frozen liver
peak_10725	chr11	3098952	3099945	993	26.4293833326347	4.26856342539749	0.724507710781059	5.8916742525704	3.82302233123626e-09	7.62157383616097e-07	29.5	690	standard ATAC-Seq in frozen liver
peak_66613	chr6	47605420	47605875	455	38.0296007696868	8.63105596616109	1.46615033451916	5.88688333177765	3.93546314433189e-09	7.79248413866023e-07	0	479	standard ATAC-Seq in frozen liver
peak_66615	chr6	47613503	47614547	1044	37.7871823608855	8.62192269609866	1.46639282872842	5.87968143814173	4.11056805979162e-09	8.08433271966074e-07	0	1093.5	standard ATAC-Seq in frozen liver
peak_76389	chr8	19963021	19963294	273	26.8653309288703	4.63024952579705	0.789577066868542	5.86421480573213	4.5126298345495e-09	8.8029748363173e-07	6	196	standard ATAC-Seq in frozen liver
peak_66618	chr6	47626476	47627163	687	37.0794890471764	8.59468992351167	1.4672094982645	5.85784779452285	4.68904092797776e-09	9.05916496635067e-07	0	702.5	standard ATAC-Seq in frozen liver
peak_34156	chr17	3077737	3077999	262	27.496053342633	3.25473834681051	0.556329764880044	5.8503760759813	4.90462773182156e-09	9.39273773438273e-07	15	180	standard ATAC-Seq in frozen liver
peak_76382	chr8	19919155	19919521	366	25.7133063420564	4.2270577388212	0.723492396095913	5.84257382887659	5.14003939586321e-09	9.77937191057722e-07	10	246	standard ATAC-Seq in frozen liver
peak_80540	chr8_random	682492	683368	876	36.3927549256405	8.56750688970529	1.46791361650775	5.8365198015452	5.33024302946019e-09	1.00973493440547e-06	0	884.5	standard ATAC-Seq in frozen liver
peak_56336	chr4	79648527	79649143	616	36.1405555604917	8.5576895703202	1.4679514338138	5.82968167283776	5.55332088432165e-09	1.04520664618268e-06	1	612.5	standard ATAC-Seq in frozen liver
peak_54876	chr4	28103934	28104308	374	35.6934452888007	8.53945690556463	1.46934432819071	5.81174660134277	6.18243753632131e-09	1.14393393391396e-06	0	371.5	standard ATAC-Seq in frozen liver
peak_66620	chr6	47631377	47631869	492	35.4426432031301	8.52947998555381	1.46807330456986	5.80998234829488	6.24794297417768e-09	1.15018464258161e-06	0	482	standard ATAC-Seq in frozen liver
peak_80549	chr8_random	727749	728462	713	35.448232321043	8.52963607081468	1.46815229645426	5.80977606438693	6.2556460867794e-09	1.15018464258161e-06	0	698.5	standard ATAC-Seq in frozen liver
peak_77389	chr8	56202112	56202332	220	35.2211839865019	8.52027110403109	1.46922711614435	5.79915181962514	6.66511706755397e-09	1.2127326000733e-06	0	214.5	standard ATAC-Seq in frozen liver
peak_87479	chrX	166427289	166427725	436	36.6787888238497	6.11548634882364	1.05499215475405	5.7967126307677	6.76274260120002e-09	1.22794288322495e-06	5	437	standard ATAC-Seq in frozen liver
peak_76352	chr8	19711492	19711692	200	25.5382571737925	3.69971888359948	0.638283650147881	5.79635540208856	6.77715648956214e-09	1.22801233708072e-06	7	131.5	standard ATAC-Seq in frozen liver
peak_76391	chr8	19974407	19974642	235	34.2836477792954	8.4813288028928	1.47036570557515	5.7681764276291	8.01338918786449e-09	1.43127307823002e-06	0	223.5	standard ATAC-Seq in frozen liver
peak_56592	chr4	88422193	88422914	721	34.0356402525813	8.47102258896743	1.46925515800922	5.76552176304444	8.14055960128998e-09	1.45102573471547e-06	0	680	standard ATAC-Seq in frozen liver
peak_80536	chr8_random	675583	676457	874	27.786850729539	5.10921024428358	0.891473917338526	5.73119431192895	9.97259432119263e-09	1.75611968289026e-06	14	655.5	standard ATAC-Seq in frozen liver
peak_87490	chrX	166446375	166446980	605	27.5461605465397	5.09673512935268	0.890986355861925	5.7203290441212	1.06317954482887e-08	1.8500694049653e-06	10	445.5	standard ATAC-Seq in frozen liver
peak_56599	chr4	88442622	88443408	786	32.6342264199453	8.41026751720558	1.47094500063863	5.71759482071333	1.08042388399329e-08	1.87614321236526e-06	0	709	standard ATAC-Seq in frozen liver
peak_17460	chr12	55814817	55815552	735	25.2211677411091	4.53500264868948	0.793523547055884	5.7150196305014	1.09691360793172e-08	1.90100558519953e-06	17	489	standard ATAC-Seq in frozen liver
peak_80535	chr8_random	674708	675357	649	24.8319611395617	3.65613716915891	0.640328109384225	5.70978708505372	1.13117596454551e-08	1.95265067536604e-06	24	412.5	standard ATAC-Seq in frozen liver
peak_56600	chr4	88445564	88446338	774	32.1633623971247	8.38931781567308	1.47127528078591	5.70207215823796	1.18359701459259e-08	2.03424420040329e-06	0	693	standard ATAC-Seq in frozen liver
peak_37763	chr18	3008479	3009059	580	34.5644235059156	6.02884860157212	1.05789072012437	5.69893325169102	1.20559412902053e-08	2.06482177255866e-06	7	547	standard ATAC-Seq in frozen liver
peak_76376	chr8	19883994	19884355	361	27.286418694108	3.09021717578503	0.543108798847111	5.68986763305035	1.27137886872282e-08	2.16478224147378e-06	21	244	standard ATAC-Seq in frozen liver
peak_56601	chr4	88448497	88449262	765	31.6952929332606	8.36814819238635	1.47191669440563	5.6852050283766	1.3065581484562e-08	2.22036238048035e-06	1	674.5	standard ATAC-Seq in frozen liver
peak_56595	chr4	88430953	88431708	755	31.4584636423721	8.35735629102915	1.47195161561123	5.67773845443877	1.36487188742004e-08	2.29715812913681e-06	0	660.5	standard ATAC-Seq in frozen liver
peak_72477	chr7	67006608	67006915	307	31.4584636423721	8.35735629102915	1.47195161561123	5.67773845443877	1.36487188742004e-08	2.29715812913681e-06	0	266.5	standard ATAC-Seq in frozen liver
peak_66621	chr6	47635097	47636279	1182	31.4626554808067	8.35749113116602	1.47247245555645	5.67582171036787	1.38024478512169e-08	2.31857280900316e-06	0	1034	standard ATAC-Seq in frozen liver
peak_23875	chr13	116982962	116983339	377	31.217442513049	8.3463496088191	1.47205131576434	5.66987680350353	1.42900237257908e-08	2.37314722287947e-06	2	323.5	standard ATAC-Seq in frozen liver
peak_66590	chr6	44742806	44743366	560	31.217442513049	8.3463496088191	1.47205131576434	5.66987680350353	1.42900237257908e-08	2.37314722287947e-06	0	481.5	standard ATAC-Seq in frozen liver
peak_54131	chr3	148715441	148715971	530	33.8644519764281	5.99826092294492	1.05850364098224	5.66673622150116	1.45543134790713e-08	2.41246015411902e-06	7	492.5	standard ATAC-Seq in frozen liver
peak_31002	chr16	3351047	3351995	948	30.7451812107502	8.3243981192232	1.47274939074577	5.65228420499151	1.583295123328e-08	2.58523145333103e-06	1	803.5	standard ATAC-Seq in frozen liver
peak_80528	chr8_random	390827	391951	1124	24.5176662658347	4.49238876205714	0.795913611649491	5.64431704182931	1.65838228895973e-08	2.68777702865679e-06	24	727	standard ATAC-Seq in frozen liver
peak_80566	chr8_random	821597	821797	200	30.5209274351656	8.31368547957767	1.47313704503689	5.64352482179925	1.66603494165934e-08	2.6928584067294e-06	0	169	standard ATAC-Seq in frozen liver
peak_30985	chr16	3114526	3115540	1014	33.1473086526955	5.96734832509011	1.05843810184176	5.6378812466279	1.72155157571046e-08	2.77474166398903e-06	9	909	standard ATAC-Seq in frozen liver
peak_56597	chr4	88436752	88437539	787	30.2840981442771	8.3024767697466	1.47320532716512	5.63565486538322	1.74394340650081e-08	2.8005171191476e-06	0	663.5	standard ATAC-Seq in frozen liver
peak_56593	chr4	88425085	88425844	759	30.050063412345	8.29127385764972	1.47353969267213	5.62677333965417	1.83611735630679e-08	2.90587983556265e-06	0	631	standard ATAC-Seq in frozen liver
peak_77391	chr8	56207223	56207607	384	29.8132341214565	8.27988918257112	1.47367110940212	5.61854618017878	1.92570927781706e-08	3.01495796574725e-06	0	316	standard ATAC-Seq in frozen liver
peak_55927	chr4	60094553	60094808	255	26.1402239291452	5.01848411276832	0.894504585182541	5.61035035023795	2.0191741469904e-08	3.14441462936749e-06	3.5	179	standard ATAC-Seq in frozen liver
peak_83784	chr9	95326194	95326586	392	29.5736102716116	8.26831963557744	1.47396949007879	5.60955955413667	2.02842187392674e-08	3.15320522174413e-06	1	319	standard ATAC-Seq in frozen liver
peak_43182	chr19	61340182	61340522	340	29.5833912279591	8.26865186928378	1.47445790048918	5.60792672787774	2.0476467559447e-08	3.17182294572609e-06	0	277.5	standard ATAC-Seq in frozen liver
peak_72479	chr7	67011053	67011293	240	29.5833912279591	8.26865186928378	1.47445790048918	5.60792672787774	2.0476467559447e-08	3.17182294572609e-06	0	197	standard ATAC-Seq in frozen liver
peak_45513	chr2	66027262	66027574	312	32.6988011015263	5.94710590382879	1.06359410069529	5.59151832446331	2.25092533189435e-08	3.46366345909682e-06	2	279.5	standard ATAC-Seq in frozen liver
peak_80562	chr8_random	817592	817796	204	29.1181163230514	8.24572136383619	1.47594652261291	5.58673450392942	2.3137904022837e-08	3.54642070433392e-06	0	165	standard ATAC-Seq in frozen liver
peak_28383	chr15	47371404	47371795	391	29.0915680129654	8.24478700567867	1.47710177456064	5.58173251679361	2.38134419224875e-08	3.6296232829305e-06	0	311.5	standard ATAC-Seq in frozen liver
peak_56591	chr4	88419184	88420039	855	28.6388686233616	8.22192053474973	1.47510850870501	5.57377337750409	2.49279973184345e-08	3.7745214486368e-06	0	678.5	standard ATAC-Seq in frozen liver
peak_76355	chr8	19719396	19719841	445	23.8113702316038	4.44835561568757	0.798340516906188	5.57200282521836	2.51827336557497e-08	3.80650719657609e-06	9	280	standard ATAC-Seq in frozen liver
peak_17459	chr12	55811088	55811988	900	31.7389084226685	5.90368669494303	1.06036829307237	5.56758131444817	2.58299551200518e-08	3.89089817926302e-06	11	773.5	standard ATAC-Seq in frozen liver
peak_26793	chr14	91310836	91311203	367	28.4020393324731	8.20997292622921	1.47539113075431	5.56460775389897	2.62742735194619e-08	3.94425067607167e-06	0	289	standard ATAC-Seq in frozen liver
peak_23582	chr13	111534130	111534817	687	25.4283387770016	4.97753440352713	0.895721161179081	5.55701329750316	2.74429861426743e-08	4.11264161681629e-06	9	467.5	standard ATAC-Seq in frozen liver
peak_7517	chr10	57686658	57686927	269	31.5104628086492	5.89299875395349	1.06091968498934	5.55461345220745	2.78226760166916e-08	4.1486902458486e-06	2	231	standard ATAC-Seq in frozen liver
peak_57704	chr4	118219780	118221341	1561	27.467297684223	8.161627111673	1.47685533378553	5.52635517166926	3.26951917243033e-08	4.80916047818369e-06	4	1188	standard ATAC-Seq in frozen liver
peak_72476	chr7	67004306	67004868	562	27.2304683933345	8.14916701842279	1.47705606364592	5.51716838581443	3.44505315409745e-08	5.00843200985805e-06	0	422	standard ATAC-Seq in frozen liver
peak_60078	chr5	4192024	4192691	667	24.9644611515721	4.95001507209548	0.897321591085679	5.51643370812732	3.45947897559695e-08	5.02094141167879e-06	13.5	448	standard ATAC-Seq in frozen liver
peak_72478	chr7	67007390	67007717	327	30.8094249460074	5.85963141232079	1.06226897117695	5.51614663641031	3.46513170014967e-08	5.02094141167879e-06	3	272.5	standard ATAC-Seq in frozen liver
peak_72483	chr7	67027845	67028099	254	27.2388520702038	8.14948131062976	1.47831156811238	5.51269535219537	3.53379610454314e-08	5.09512852180413e-06	0	192	standard ATAC-Seq in frozen liver
peak_77392	chr8	56208270	56208970	700	26.759604370514	8.1240245082024	1.47772406078572	5.49766003260635	3.84863994815882e-08	5.46800518868364e-06	0	518	standard ATAC-Seq in frozen liver
peak_9507	chr10	95540111	95540510	399	66.4442000570935	7.98779262422086	1.45407791917257	5.49337316721394	3.94328335234148e-08	5.5843400600902e-06	2	729	standard ATAC-Seq in frozen liver
peak_36854	chr17	68090569	68091013	444	66.4721456466577	7.98820433279926	1.45429870511078	5.49282228246965	3.9556079710824e-08	5.59274400680389e-06	3	817.5	standard ATAC-Seq in frozen liver
peak_7520	chr10	57690676	57690909	233	26.5255696385819	8.11133998964033	1.47809456370698	5.48770030605993	4.07200151742566e-08	5.73661988066749e-06	0	170.5	standard ATAC-Seq in frozen liver
peak_56203	chr4	64158746	64159248	502	26.5227750796255	8.1112339209342	1.47813399552067	5.48748215352222	4.07703191966908e-08	5.73661988066749e-06	0	367	standard ATAC-Seq in frozen liver
peak_65392	chr5	152536969	152537389	420	65.9876397753789	7.97779932385993	1.45391014005607	5.48713369834003	4.08507948612814e-08	5.73871703926884e-06	4	765	standard ATAC-Seq in frozen liver
peak_71975	chr7	46585518	46585785	267	24.4921998492733	4.92160878197443	0.898393055893307	5.47823555590674	4.29588003869467e-08	5.9963496827196e-06	5	176	standard ATAC-Seq in frozen liver
peak_76360	chr8	19757931	19758183	252	26.2971240245626	8.09875904103239	1.47916565648316	5.47522111910565	4.36965627964786e-08	6.06066478507926e-06	0	184.5	standard ATAC-Seq in frozen liver
peak_43847	chr2	22595012	22595326	314	26.0616920131524	8.08579506016545	1.47941888875115	5.46552103778468	4.61549044625372e-08	6.34461657504234e-06	0	225.5	standard ATAC-Seq in frozen liver
peak_24261	chr14	20110516	20111087	571	25.8178763248728	8.07238508669372	1.47930939182423	5.45686056703739	4.84626610410205e-08	6.62719317445168e-06	0	407	standard ATAC-Seq in frozen liver
peak_18905	chr12	100883196	100883979	783	25.5838415929408	8.05923626027686	1.47965610537916	5.44669550646142	5.13141958670779e-08	6.97355141007887e-06	1	552	standard ATAC-Seq in frozen liver
peak_80561	chr8_random	816895	817183	288	29.1659236508939	5.77945176201851	1.06518512720454	5.42577211642642	5.77045431864725e-08	7.7102960536441e-06	3	229.5	standard ATAC-Seq in frozen liver
peak_76349	chr8	19700251	19700724	473	25.1227585264677	8.03285607967699	1.48104750578255	5.42376665725698	5.83560519480156e-08	7.77087003748756e-06	0	329.5	standard ATAC-Seq in frozen liver
peak_83662	chr9	89105287	89106593	1306	23.9405040343956	3.20185409465697	0.590351943706806	5.42363606792349	5.83987224785526e-08	7.77087003748756e-06	60	783	standard ATAC-Seq in frozen liver
peak_2582	chr1	102076664	102076984	320	62.0034602146208	7.8875391820988	1.4549325750846	5.42124034967062	5.91869180886987e-08	7.86036401245041e-06	2	548	standard ATAC-Seq in frozen liver
peak_52252	chr3	95848444	95848960	516	24.4094760948458	7.99145848968171	1.48180154014763	5.39306936398886	6.92641988610347e-08	8.98064210387984e-06	0	346	standard ATAC-Seq in frozen liver
peak_72480	chr7	67013631	67013871	240	24.4164624922368	7.99174872939927	1.48199641336847	5.39255605297628	6.94624207358215e-08	8.98925130536892e-06	0	162.5	standard ATAC-Seq in frozen liver
peak_34628	chr17	15115326	15116072	746	24.183825039783	7.9779003327243	1.48282468684379	5.38020468873185	7.44011943068609e-08	9.56170062340993e-06	0	503	standard ATAC-Seq in frozen liver
peak_76361	chr8	19759464	19760252	788	23.9442011899381	7.96361928543801	1.48263140793262	5.37127383301724	7.81823807500451e-08	1.00055332216939e-05	0	519.5	standard ATAC-Seq in frozen liver
peak_67109	chr6	56183522	56183876	354	23.9469957488945	7.96373806703042	1.48291045686495	5.37034318570165	7.85869441943295e-08	1.00260215290722e-05	0	236.5	standard ATAC-Seq in frozen liver
peak_80541	chr8_random	697170	697386	216	24.1964005550868	7.97846552925275	1.48830998081269	5.36075524058241	8.28747410958957e-08	1.04511735820918e-05	0	145.5	standard ATAC-Seq in frozen liver
peak_85316	chrUn_random	5889485	5889828	343	27.9803799169732	5.71865772214819	1.06686798100169	5.36022996657834	8.31160792518156e-08	1.04665268202009e-05	2	260	standard ATAC-Seq in frozen liver
peak_66629	chr6	47714174	47714403	229	23.7143582964406	7.94961698166971	1.48377567046027	5.35769465690438	8.42905338741098e-08	1.05839644679028e-05	0	151	standard ATAC-Seq in frozen liver
peak_80637	chr9	7857501	7858173	672	24.2052633544781	3.04985583827356	0.569306716207836	5.35714009943306	8.45495601544507e-08	1.05887710109039e-05	36.5	400	standard ATAC-Seq in frozen liver
peak_39285	chr18	54858564	54859147	583	23.6961936632239	7.94882788379299	1.48545729145213	5.35109823051359	8.74220484539542e-08	1.08834854319226e-05	1	378	standard ATAC-Seq in frozen liver
peak_76354	chr8	19719058	19719276	218	23.4747344465957	7.93505145180633	1.48357695281844	5.34859444717825	8.86399160014421e-08	1.10037968915322e-05	0	141.5	standard ATAC-Seq in frozen liver
peak_86344	chrX	72979072	72979635	563	22.2474671856376	3.48388305205307	0.651694915424335	5.34588036456388	8.99786277073024e-08	1.11541636236762e-05	23	320	standard ATAC-Seq in frozen liver
peak_76375	chr8	19875510	19875775	265	22.8441757694013	4.81775246373731	0.904318115453046	5.3274974606958	9.95751706491867e-08	1.21713957542544e-05	5	161	standard ATAC-Seq in frozen liver
peak_77387	chr8	56199185	56199539	354	22.9982813058623	7.9055966798421	1.48507089919776	5.32337997068876	1.01856671584876e-07	1.24155905855665e-05	0	224.5	standard ATAC-Seq in frozen liver
peak_31320	chr16	11423542	11424272	730	22.6062801453585	4.80260114067758	0.905460163851138	5.30404465310873	1.13264587578922e-07	1.36917174590051e-05	13	440.5	standard ATAC-Seq in frozen liver
peak_34633	chr17	15146627	15147454	827	22.535800959911	7.87616057150458	1.48560815482003	5.3016406418816	1.14766582768591e-07	1.37804272937188e-05	0	518	standard ATAC-Seq in frozen liver
peak_39167	chr18	48169935	48170302	367	22.5330064009546	7.87603431135524	1.48559286766055	5.30161020748445	1.14785720782013e-07	1.37804272937188e-05	1	228.5	standard ATAC-Seq in frozen liver
peak_86346	chrX	72985102	72985302	200	26.8126698699454	5.65550816275639	1.06911892611244	5.28987750999894	1.22398302840167e-07	1.44955034726233e-05	2	145	standard ATAC-Seq in frozen liver
peak_85180	chrUn_random	3658473	3659025	552	54.7302188915099	7.7066890956528	1.45713238165287	5.2889423038632	1.23025686704871e-07	1.45373031510794e-05	2	832.5	standard ATAC-Seq in frozen liver
peak_2543	chr1	97348410	97348835	425	22.3031635074571	7.86115048122535	1.48636110901378	5.28885641150911	1.23083463418799e-07	1.45373031510794e-05	0	265	standard ATAC-Seq in frozen liver
peak_36392	chr17	50559309	50559655	346	26.8018225804436	5.65544977701905	1.07054128391536	5.28279465910461	1.27227969370099e-07	1.49061106443129e-05	3	249.5	standard ATAC-Seq in frozen liver
peak_60037	chr4_random	142955	143404	449	22.0635396576122	7.84565926938548	1.48668560289121	5.27728206564168	1.31113990856578e-07	1.52592624544905e-05	1	271.5	standard ATAC-Seq in frozen liver
peak_85271	chrUn_random	5251007	5251207	200	22.0635396576122	7.84565926938548	1.48668560289121	5.27728206564168	1.31113990856578e-07	1.52592624544905e-05	0	122	standard ATAC-Seq in frozen liver
peak_56247	chr4	70039013	70039414	401	54.0211282983227	7.68782447065708	1.45704328829028	5.27631850916256	1.31804922373793e-07	1.53064367432971e-05	3	597	standard ATAC-Seq in frozen liver
peak_17001	chr12	31263362	31264009	647	22.0691287755251	7.84591810959819	1.48703131805381	5.27622923225767	1.31869117613844e-07	1.53064367432971e-05	0	395	standard ATAC-Seq in frozen liver
peak_34346	chr17	7182938	7183431	493	21.0158443496765	3.91881172318553	0.744126479970783	5.26632478303875	1.39181960603878e-07	1.59229621046939e-05	13	266	standard ATAC-Seq in frozen liver
peak_19297	chr12	106762820	106763168	348	26.3393422344923	5.6297222506155	1.06993751850271	5.26172991717671	1.42706290415521e-07	1.63048457322141e-05	3	248.5	standard ATAC-Seq in frozen liver
peak_14082	chr11	88943000	88943435	435	21.5926756347917	7.81456471308816	1.48795100059018	5.25189654094027	1.50541018621843e-07	1.70884557830935e-05	0	259.5	standard ATAC-Seq in frozen liver
peak_24045	chr14	9119054	9119468	414	52.6029471119482	7.64934346995825	1.45730559130564	5.24896323433781	1.52957595552487e-07	1.73178470959354e-05	2	598	standard ATAC-Seq in frozen liver
peak_76372	chr8	19862327	19862643	316	21.3600381823378	7.79889628188198	1.48840547821946	5.23976590788391	1.60780419273266e-07	1.80865572164229e-05	0	188	standard ATAC-Seq in frozen liver
peak_80539	chr8_random	681513	681941	428	51.9106238724994	7.63002810054942	1.45788182834868	5.23363962166387	1.66204352998009e-07	1.86248895903109e-05	2	614	standard ATAC-Seq in frozen liver
peak_85352	chrX	4545234	4545476	242	21.3502572259904	7.79841958427425	1.49074714683861	5.23121550211395	1.68399052102831e-07	1.88270550254277e-05	0	141.5	standard ATAC-Seq in frozen liver
peak_77388	chr8	56200205	56200630	425	21.1371816862314	7.78354075082726	1.49186235074437	5.21733171089387	1.81519016547158e-07	2.00838973567519e-05	2	248	standard ATAC-Seq in frozen liver
peak_85202	chrUn_random	3921948	3922678	730	20.8919687184737	7.76690279046636	1.4896450999352	5.21392833152286	1.84882921417499e-07	2.03807556185511e-05	2	424	standard ATAC-Seq in frozen liver
peak_72482	chr7	67024130	67024480	350	20.8905714389955	7.7668343181172	1.48963704637495	5.21391055426413	1.84900649700403e-07	2.03807556185511e-05	0	203	standard ATAC-Seq in frozen liver
peak_17461	chr12	55819819	55820774	955	20.653742148107	7.75042800211027	1.49042767426005	5.20013693784779	1.99141752873917e-07	2.16774714798164e-05	0	545	standard ATAC-Seq in frozen liver
peak_86350	chrX	72999468	72999998	530	25.1677712953538	5.56268779924211	1.07247603006097	5.18677121289681	2.13971327776047e-07	2.30622618665417e-05	7.5	362.5	standard ATAC-Seq in frozen liver
peak_85868	chrX	34670458	34670701	243	20.426693813566	7.73432528611768	1.4915055777649	5.18558254251249	2.15340684088956e-07	2.31813054499156e-05	0	138	standard ATAC-Seq in frozen liver
peak_66627	chr6	47708572	47708961	389	20.4294883725224	7.73446856794081	1.4923639635203	5.18269588183848	2.18701483486225e-07	2.3427827580454e-05	0	221.5	standard ATAC-Seq in frozen liver
peak_21732	chr13	53365135	53365507	372	20.1828781252864	7.71718628596442	1.49196815900781	5.17248725408224	2.30998261350067e-07	2.45945703589982e-05	0	208.5	standard ATAC-Seq in frozen liver
peak_85237	chrUn_random	4523788	4525284	1496	20.1926590816339	7.71768567719442	1.49236046665982	5.17146215650433	2.32269315966685e-07	2.46998520827319e-05	5	836	standard ATAC-Seq in frozen liver
peak_80572	chr8_random	839977	840456	479	19.953035231789	7.70056212584965	1.49225106931925	5.16036629771862	2.46467130220681e-07	2.61243699843476e-05	0	264	standard ATAC-Seq in frozen liver
peak_72485	chr7	67034263	67034508	245	19.9544325112672	7.7006341289571	1.492356809253	5.16004891136702	2.46885333596176e-07	2.61243699843476e-05	0	136	standard ATAC-Seq in frozen liver
peak_17462	chr12	55830122	55831089	967	19.9502406728326	7.70041822753095	1.49233164928038	5.15999123334563	2.46961406475896e-07	2.61243699843476e-05	0	532.5	standard ATAC-Seq in frozen liver
peak_66159	chr6	31546023	31546318	295	19.7190004998569	7.68352552997939	1.49297566299049	5.14645062236915	2.65461297719063e-07	2.77242330728815e-05	0	161.5	standard ATAC-Seq in frozen liver
peak_60067	chr5	3893522	3894291	769	20.9691033549884	4.68953460278825	0.911258683192926	5.1462166443855	2.65792447689085e-07	2.77257320969023e-05	14	428	standard ATAC-Seq in frozen liver
peak_70812	chr7	12595678	12596258	580	20.0612254027779	4.18858264040456	0.816058101295834	5.13270149975036	2.85612689355838e-07	2.9546733994957e-05	11	308	standard ATAC-Seq in frozen liver
peak_52278	chr3	96050189	96051046	857	19.4849657679248	7.66628543756207	1.49374108604463	5.13227192395309	2.86265513429362e-07	2.95793051591786e-05	2	459.5	standard ATAC-Seq in frozen liver
peak_72484	chr7	67030693	67030941	248	19.4877603268813	7.66643400810324	1.49427152413737	5.13054949135099	2.88897587108193e-07	2.98160706675967e-05	0	134	standard ATAC-Seq in frozen liver
peak_86351	chrX	73003311	73004852	1541	19.8254624450437	4.1701203354266	0.817009606850443	5.10412643922552	3.32326033569807e-07	3.38197122073017e-05	40	796.5	standard ATAC-Seq in frozen liver
peak_66632	chr6	47722898	47723167	269	19.0127044656261	7.63094750291688	1.49505476926609	5.10412572153649	3.32327294624933e-07	3.38197122073017e-05	0.5	140.5	standard ATAC-Seq in frozen liver
peak_76348	chr8	19699330	19699732	402	23.7660265163939	5.47767258562582	1.07677405590459	5.08711419595272	3.63552946195129e-07	3.66564404355432e-05	5	259	standard ATAC-Seq in frozen liver
peak_32858	chr16	45352977	45353342	365	18.5446350017619	7.59495498327915	1.49655395421974	5.07496235726358	3.87572720003834e-07	3.88100421991024e-05	0	186.5	standard ATAC-Seq in frozen liver
peak_76364	chr8	19772323	19772866	543	18.5502241196748	7.59526837469805	1.49772990115037	5.07118698028549	3.95342103661334e-07	3.94976547606579e-05	2	281	standard ATAC-Seq in frozen liver
peak_7518	chr10	57687088	57687535	447	18.3064084313952	7.57637998371613	1.49751756420179	5.05929290235372	4.20814040542974e-07	4.18513909253188e-05	0	225	standard ATAC-Seq in frozen liver
peak_53444	chr3	127912820	127913191	371	18.3036138724388	7.57622098981005	1.49820199982202	5.05687550190834	4.26181260417099e-07	4.2241175232666e-05	0	187	standard ATAC-Seq in frozen liver
peak_68891	chr6	114564456	114564865	409	18.3203812261773	7.5771820930649	1.50116869138101	5.04752206502136	4.47577093477452e-07	4.40129209483743e-05	1	209.5	standard ATAC-Seq in frozen liver
peak_38993	chr18	43135412	43135809	397	18.0723736994632	7.55780221640581	1.49820598301364	5.04456817159635	4.54546754126489e-07	4.46481227546534e-05	0	196	standard ATAC-Seq in frozen liver
peak_80151	chr8	126139073	126139356	283	18.077962817376	7.55812195116919	1.49848221283963	5.04385162960763	4.56253134756428e-07	4.47418819094764e-05	0	142.5	standard ATAC-Seq in frozen liver
peak_1124	chr1	56838998	56839367	369	18.070976419985	7.557722087527	1.498436622001	5.04373823794729	4.56523732505655e-07	4.47418819094764e-05	0	183.5	standard ATAC-Seq in frozen liver
peak_87482	chrX	166430304	166430511	207	23.0625250411195	5.43330293852916	1.07895894414981	5.03569016039849	4.76130184516236e-07	4.64553373675322e-05	2.5	129.5	standard ATAC-Seq in frozen liver
peak_80152	chr8	126142492	126142745	253	17.8397362470093	7.53906298339788	1.49888343499321	5.02978604432441	4.91027453172981e-07	4.77417320661799e-05	0	125	standard ATAC-Seq in frozen liver
peak_80135	chr8	126067627	126068106	479	17.8411335264875	7.53914389763089	1.49895410569274	5.02960288710553	4.91496710332934e-07	4.77417320661799e-05	0	234.5	standard ATAC-Seq in frozen liver
peak_76381	chr8	19917272	19917731	459	17.8481199238785	7.53955492533141	1.50117259277584	5.02244376270545	5.10181381549208e-07	4.93376401456411e-05	0	228.5	standard ATAC-Seq in frozen liver
peak_60805	chr5	33080166	33080461	295	19.7964660826954	4.60365365006861	0.916775649190277	5.02157060359826	5.12506577730513e-07	4.95077960004379e-05	5	155.5	standard ATAC-Seq in frozen liver
peak_54376	chr4	3010341	3011014	673	22.8260266965548	5.41854791037126	1.07940963694476	5.01991804122513	5.1693530489577e-07	4.98256177854327e-05	4	417	standard ATAC-Seq in frozen liver
peak_71948	chr7	39206387	39206604	217	17.6070987945554	7.52007729987471	1.4998542146759	5.01387216590227	5.33454351420026e-07	5.13048256944277e-05	0	106.5	standard ATAC-Seq in frozen liver
peak_30169	chr15	87798302	87798669	367	17.6015096766426	7.5197487427854	1.50007007953994	5.01293162589554	5.36069496867862e-07	5.14432744477834e-05	1	179	standard ATAC-Seq in frozen liver
peak_80542	chr8_random	699849	700163	314	17.6098933535119	7.52024258028047	1.50050675623681	5.01180187894709	5.39227070598956e-07	5.16896100676342e-05	0	153.5	standard ATAC-Seq in frozen liver
peak_80570	chr8_random	836536	836810	274	17.6126879124683	7.52041046639581	1.50167549025247	5.00801305955353	5.49948040843385e-07	5.26020793295871e-05	0	134	standard ATAC-Seq in frozen liver
peak_76374	chr8	19871532	19872066	534	22.5891974056664	5.40318722451436	1.07968721587528	5.0044004829066	5.60361513775217e-07	5.34229622266811e-05	6	324	standard ATAC-Seq in frozen liver
peak_7523	chr10	57696127	57696755	628	17.3688722241887	7.50050572027816	1.50058495763596	4.9983879167325	5.78115943511813e-07	5.47577156495783e-05	0.5	302.5	standard ATAC-Seq in frozen liver
peak_17641	chr12	68160046	68160811	765	17.3688722241887	7.50050572027816	1.50058495763596	4.9983879167325	5.78115943511813e-07	5.47577156495783e-05	1	367.5	standard ATAC-Seq in frozen liver
peak_72487	chr7	67038244	67038502	258	17.3730640626234	7.50075545275561	1.5008081893033	4.99781085032432	5.7984819653597e-07	5.47714297748518e-05	0	125	standard ATAC-Seq in frozen liver
peak_80136	chr8	126070994	126071286	292	17.3674749447105	7.50042237022533	1.50077050544911	4.99771440269663	5.80138203147746e-07	5.47714297748518e-05	0	141.5	standard ATAC-Seq in frozen liver
peak_76268	chr8	14306692	14307459	767	22.3509708352997	5.38759717597459	1.0801938449262	4.98762069537868	6.11274316260481e-07	5.746306861955e-05	7	466.5	standard ATAC-Seq in frozen liver
peak_51080	chr3	59848988	59849966	978	41.1055714319105	7.2913548380007	1.46239589271905	4.98589668796443	6.16750960287312e-07	5.78536198214205e-05	7	1108	standard ATAC-Seq in frozen liver
peak_85179	chrUn_random	3651008	3651540	532	17.1334402127785	7.48083353495522	1.50151394665612	4.98219383950117	6.28674106946627e-07	5.87830439806216e-05	1.5	253.5	standard ATAC-Seq in frozen liver
peak_49798	chr2	181664937	181665744	807	40.6458856449156	7.27491363992895	1.46324261365008	4.97177540625445	6.63425352140744e-07	6.18342102172585e-05	6	901	standard ATAC-Seq in frozen liver
peak_30316	chr15	91739809	91740348	539	16.8980082013682	7.46088928695733	1.50249977302083	4.96565085794119	6.84710427547734e-07	6.35610427994779e-05	0	250.5	standard ATAC-Seq in frozen liver
peak_80145	chr8	126116962	126117260	298	16.9049945987592	7.46131810490968	1.50289242877426	4.9646388271415	6.88290373008505e-07	6.36770456187435e-05	0	140.5	standard ATAC-Seq in frozen liver
peak_80149	chr8	126130306	126130643	337	16.9049945987592	7.46131810490968	1.50289242877426	4.9646388271415	6.88290373008505e-07	6.36770456187435e-05	0	157	standard ATAC-Seq in frozen liver
peak_80571	chr8_random	837096	837596	500	16.9049945987592	7.46131810490968	1.50289242877426	4.9646388271415	6.88290373008505e-07	6.36770456187435e-05	0	233.5	standard ATAC-Seq in frozen liver
peak_85284	chrUn_random	5336648	5337273	625	16.6639734694361	7.44075248237741	1.50327286416117	4.9497018537146	7.4327254720295e-07	6.8044424747547e-05	0	285.5	standard ATAC-Seq in frozen liver
peak_72025	chr7	48366628	48366978	350	16.6625761899579	7.44066532242551	1.50354632950608	4.94874363124533	7.46940530209511e-07	6.82709583179683e-05	1	161.5	standard ATAC-Seq in frozen liver
peak_77685	chr8	71996417	71996771	354	16.6611789104797	7.44057765573406	1.50396271982988	4.94731522106859	7.52440736846803e-07	6.8668259487065e-05	0	162	standard ATAC-Seq in frozen liver
peak_80550	chr8_random	728621	728896	275	21.8898877688265	5.35663217236228	1.0834537231911	4.94403411765973	7.65223025732328e-07	6.97386702720807e-05	4	164	standard ATAC-Seq in frozen liver
peak_60111	chr5	5944774	5945327	553	16.4313360169823	7.42041864540048	1.50403144052291	4.93368585620829	8.06921857880022e-07	7.29791618502989e-05	0	252.5	standard ATAC-Seq in frozen liver
peak_72486	chr7	67036411	67036812	401	16.429938737504	7.42033059131141	1.50409428714131	4.93342116564683	8.08016634478681e-07	7.29791618502989e-05	0	183	standard ATAC-Seq in frozen liver
peak_76876	chr8	36197824	36198168	344	16.4341305759387	7.42059500359195	1.50434221188132	4.93278387389783	8.10658384650483e-07	7.31422795528099e-05	0	157.5	standard ATAC-Seq in frozen liver
peak_85177	chrUn_random	3636097	3636419	322	16.4369251348951	7.42077310962447	1.50523949676245	4.9299617274098	8.22457279325797e-07	7.39434033310662e-05	0	147	standard ATAC-Seq in frozen liver
peak_60804	chr5	33076597	33076887	290	18.6685106329648	3.73593879886258	0.757829774347557	4.92978624662641	8.23196369556445e-07	7.39434033310662e-05	9	138	standard ATAC-Seq in frozen liver
peak_85309	chrUn_random	5810835	5811320	485	16.1973012850502	7.39970478018599	1.50497726592896	4.91682163425801	8.79606266730735e-07	7.84732526585191e-05	0	218.5	standard ATAC-Seq in frozen liver
peak_80147	chr8	126120267	126120468	201	16.1931094466156	7.39943625895402	1.50539726738293	4.91527148300038	8.86595124637936e-07	7.90162105022276e-05	0	89.5	standard ATAC-Seq in frozen liver
peak_54374	chr4	3007571	3007836	265	21.419023746006	5.32451044475294	1.08452233793388	4.90954428370436	9.12882842935098e-07	8.11936926126391e-05	2	153	standard ATAC-Seq in frozen liver
peak_35796	chr17	35468380	35468826	446	18.9346672325254	3.47296313278457	0.707589349026354	4.90816196931651	9.19339170853197e-07	8.15837172627371e-05	16	213.5	standard ATAC-Seq in frozen liver
peak_76387	chr8	19928704	19929329	625	38.060656304161	7.17965302604297	1.46493920407323	4.90099043433345	9.53546997468708e-07	8.41264916042982e-05	2	655.5	standard ATAC-Seq in frozen liver
peak_60251	chr5	15119694	15120185	491	15.9632665531181	7.37868922739717	1.50598260695718	4.89958462555271	9.60394780426467e-07	8.43267004499302e-05	0	215.5	standard ATAC-Seq in frozen liver
peak_80150	chr8	126135444	126135927	483	15.9646638325963	7.37878017194632	1.50622424390094	4.89885898585468	9.63947917472409e-07	8.43267004499302e-05	0	214.5	standard ATAC-Seq in frozen liver
peak_17286	chr12	42241579	42241932	353	15.9590747146835	7.3784169191827	1.50618393734085	4.89874890858894	9.64488021462541e-07	8.43267004499302e-05	0	155.5	standard ATAC-Seq in frozen liver
peak_80134	chr8	126065628	126065935	307	15.9590747146835	7.3784169191827	1.50618393734085	4.89874890858894	9.64488021462541e-07	8.43267004499302e-05	0	134.5	standard ATAC-Seq in frozen liver
peak_80909	chr9	21095415	21096200	785	15.9590747146835	7.3784169191827	1.50618393734085	4.89874890858894	9.64488021462541e-07	8.43267004499302e-05	0	348	standard ATAC-Seq in frozen liver
peak_76378	chr8	19899393	19900185	792	21.1835917345957	5.30817749073218	1.08511252990311	4.89182213314427	9.99067117862812e-07	8.70023433713786e-05	10	453.5	standard ATAC-Seq in frozen liver
peak_76347	chr8	19695657	19695931	274	15.9730475094656	7.37934281799581	1.51102419438611	4.88366953051593	1.04129539851748e-06	9.03202497352341e-05	0	121	standard ATAC-Seq in frozen liver
peak_80141	chr8	126098309	126098641	332	15.7278345417078	7.3572709207384	1.50688255859564	4.8824448055163	1.04778572807485e-06	9.07163245268478e-05	0	145	standard ATAC-Seq in frozen liver
peak_51585	chr3	82927891	82928248	357	15.7264372622296	7.35717887727836	1.50687236081208	4.88241676508914	1.04793478098062e-06	9.07163245268478e-05	1	155	standard ATAC-Seq in frozen liver
peak_85087	chr9	123836345	123837117	772	15.7250399827514	7.35708672817716	1.50702108502627	4.8818737848309	1.05082509723404e-06	9.08072635413727e-05	0	336.5	standard ATAC-Seq in frozen liver
peak_36435	chr17	53291724	53292080	356	15.7236427032732	7.35699423969891	1.50732938361516	4.8808139214098	1.0564889333371e-06	9.11862474918436e-05	0	155	standard ATAC-Seq in frozen liver
peak_80137	chr8	126079580	126080002	422	15.7320263801425	7.35754875329884	1.50786984423962	4.87943225431971	1.06391659542015e-06	9.1614998475197e-05	0	184	standard ATAC-Seq in frozen liver
peak_60207	chr5	14914454	14914662	208	15.7348209390989	7.35773764613121	1.50933985044132	4.87480513018976	1.089159161519e-06	9.29971908848596e-05	0	91	standard ATAC-Seq in frozen liver
peak_80559	chr8_random	790019	791272	1253	15.4924025302976	7.33552985252434	1.50784067753835	4.86492370301354	1.14500968254427e-06	9.75755622264774e-05	5	540	standard ATAC-Seq in frozen liver
peak_62077	chr5	80929781	80930128	347	15.4896079713411	7.33534266608371	1.50814780112011	4.86380887910038	1.15148104805633e-06	9.79363166616542e-05	0	147.5	standard ATAC-Seq in frozen liver
peak_85209	chrUn_random	4058746	4059088	342	15.4965943687322	7.33581132073026	1.50861031112448	4.86262838496864	1.15837197696381e-06	9.84267544193162e-05	0	148	standard ATAC-Seq in frozen liver
peak_60257	chr5	15147416	15147638	222	15.4979916482104	7.33590627760391	1.50919832927417	4.86079671260438	1.16914265371587e-06	9.91494146420144e-05	0	96	standard ATAC-Seq in frozen liver
peak_80140	chr8	126091353	126091832	479	15.2597650778437	7.31364606612204	1.50905088199293	4.84652052054285	1.25645597436597e-06	0.000105723690895579	0	204.5	standard ATAC-Seq in frozen liver
peak_85174	chrUn_random	3572815	3573175	360	15.2555732394091	7.3133611051504	1.50901957185408	4.84643224087859	1.25701492565867e-06	0.000105723690895579	1	150	standard ATAC-Seq in frozen liver
peak_19744	chr12	116306003	116306619	616	15.2611623573219	7.31374149068721	1.5093997702643	4.84546349798803	1.26316435120724e-06	0.000105842345473709	1	261.5	standard ATAC-Seq in frozen liver
peak_80142	chr8	126103192	126103399	207	15.2611623573219	7.31374149068721	1.5093997702643	4.84546349798803	1.26316435120724e-06	0.000105842345473709	0	87	standard ATAC-Seq in frozen liver
peak_30315	chr15	91738809	91739498	689	15.0229357869552	7.29113578519582	1.50987200904081	4.82897605991632	1.3723690459354e-06	0.000113096390330716	0	287	standard ATAC-Seq in frozen liver
peak_72481	chr7	67020529	67020851	322	15.0257303459116	7.29132891996822	1.51024167516611	4.82792194114643	1.37965148244594e-06	0.000113589574875057	0	135.5	standard ATAC-Seq in frozen liver
peak_60230	chr5	14989058	14989314	256	15.0271276253898	7.29142614338062	1.51068933001156	4.82655566470759	1.38914579386681e-06	0.000113939885040142	0	106.5	standard ATAC-Seq in frozen liver
peak_76365	chr8	19774015	19774366	351	15.0271276253898	7.29142614338062	1.51068933001156	4.82655566470759	1.38914579386681e-06	0.000113939885040142	0	145	standard ATAC-Seq in frozen liver
peak_85312	chrUn_random	5872447	5873549	1102	15.0187439485206	7.29084553247846	1.51062602064689	4.82637359136467	1.39041576369556e-06	0.000113939885040142	1	461	standard ATAC-Seq in frozen liver
peak_74113	chr7	113357372	113357819	447	15.0173466690424	7.29074761963196	1.51123015987731	4.82437937860098	1.40439877556322e-06	0.00011497808834286	0.5	185	standard ATAC-Seq in frozen liver
peak_80569	chr8_random	833177	833475	298	15.0327167433027	7.29182493785067	1.51428028721555	4.81537334891868	1.46924927236527e-06	0.000119727399504782	0	125	standard ATAC-Seq in frozen liver
peak_54379	chr4	3017935	3018693	758	14.7889010550231	7.26846470045431	1.51094937852112	4.81052827035706	1.50531909569255e-06	0.000121985205496219	3	309.5	standard ATAC-Seq in frozen liver
peak_17463	chr12	55835347	55835941	594	14.7861064960667	7.26826872233678	1.51110772441295	4.80989449323372	1.51009983346476e-06	0.000122259414731732	0	241.5	standard ATAC-Seq in frozen liver
peak_34639	chr17	15177976	15178882	906	14.7916956139795	7.26866125582506	1.51151071739146	4.80887179441849	1.51784510155614e-06	0.000122582592432181	1	376.5	standard ATAC-Seq in frozen liver
peak_80146	chr8	126118573	126118992	419	14.7916956139795	7.26866125582506	1.51151071739146	4.80887179441849	1.51784510155614e-06	0.000122582592432181	0	173.5	standard ATAC-Seq in frozen liver
peak_85138	chrUn_random	2430156	2430451	295	14.7930928934578	7.26876040373831	1.51206377781522	4.80717844735422	1.5307534742641e-06	0.000123360969902504	0	121	standard ATAC-Seq in frozen liver
peak_76359	chr8	19752803	19753054	251	14.5534690436129	7.2453321473774	1.51199469242467	4.79190316188122	1.65206643460932e-06	0.000131577638390267	0	100	standard ATAC-Seq in frozen liver
peak_77686	chr8	71998448	71999061	613	14.5534690436129	7.2453321473774	1.51199469242467	4.79190316188122	1.65206643460932e-06	0.000131577638390267	1	247.5	standard ATAC-Seq in frozen liver
peak_65094	chr5	147478060	147478279	219	14.5548663230911	7.24543169501503	1.51209821856903	4.79164091726246	1.65422771771825e-06	0.000131577638390267	0	88	standard ATAC-Seq in frozen liver
peak_60258	chr5	15149435	15149834	399	14.5520717641346	7.24523261187108	1.51207657896683	4.79157782922713	1.65474806172959e-06	0.000131577638390267	1	160	standard ATAC-Seq in frozen liver
peak_23913	chr13	120283067	120283317	250	17.7023825039166	3.99723768179832	0.834232462039709	4.79151539131554	1.655263198479e-06	0.000131577638390267	5	114.5	standard ATAC-Seq in frozen liver
peak_60240	chr5	15024201	15024421	220	14.5562636025693	7.24553152856946	1.51238757639712	4.79079016625494	1.66125788782165e-06	0.000131934327662671	0	88	standard ATAC-Seq in frozen liver
peak_60206	chr5	14910730	14910974	244	14.5590581615257	7.24573312418007	1.51352977384558	4.78730795349345	1.69033358804741e-06	0.000133637132152052	0	99	standard ATAC-Seq in frozen liver
peak_60239	chr5	15023472	15023694	222	14.5590581615257	7.24573312418007	1.51352977384558	4.78730795349345	1.69033358804741e-06	0.000133637132152052	0	90	standard ATAC-Seq in frozen liver
peak_60204	chr5	14905462	14905887	425	14.3194343116808	7.22192376817371	1.51312145684408	4.7728645545986	1.81623942492695e-06	0.000141820652332454	1	168.5	standard ATAC-Seq in frozen liver
peak_85263	chrUn_random	5168985	5169270	285	14.3194343116808	7.22192376817371	1.51312145684408	4.7728645545986	1.81623942492695e-06	0.000141820652332454	0	113	standard ATAC-Seq in frozen liver
peak_60242	chr5	15031369	15031761	392	14.3180370322026	7.22182263559829	1.51311050311896	4.77283226883432	1.81653071064204e-06	0.000141820652332454	1	155.5	standard ATAC-Seq in frozen liver
peak_80133	chr8	126064969	126065173	204	14.3180370322026	7.22182263559829	1.51311050311896	4.77283226883432	1.81653071064204e-06	0.000141820652332454	0	80.5	standard ATAC-Seq in frozen liver
peak_60228	chr5	14981214	14981490	276	14.320831591159	7.22202505474903	1.51332398847903	4.77229272101048	1.82140521891387e-06	0.000141947963805987	0	109	standard ATAC-Seq in frozen liver
peak_77395	chr8	57983903	57984210	307	14.3152424732462	7.221619699033	1.51366427889238	4.77095205306516	1.83357186998101e-06	0.00014276901822853	0	119.5	standard ATAC-Seq in frozen liver
peak_77396	chr8	57988514	57988768	254	14.3264207090718	7.22243725849897	1.51608186174555	4.76388342921231	1.89902238076112e-06	0.000147471641297101	0	102	standard ATAC-Seq in frozen liver
peak_80144	chr8	126110108	126110457	349	14.0840023002705	7.19802648414383	1.51421442698346	4.7536375006566	1.99789118047482e-06	0.000154182191274101	0	136.5	standard ATAC-Seq in frozen liver
peak_10699	chr11	3003923	3004125	202	14.0853995797487	7.19812933377222	1.51432441933299	4.7533601399248	2.00063515497846e-06	0.000154182191274101	0	79	standard ATAC-Seq in frozen liver
peak_37928	chr18	7033577	7033938	361	14.0826050207923	7.19792364678159	1.51430224288425	4.75329392174173	2.00129079728264e-06	0.000154182191274101	0	142	standard ATAC-Seq in frozen liver
peak_43476	chr2	6997144	6997534	390	14.0826050207923	7.19792364678159	1.51430224288425	4.75329392174173	2.00129079728264e-06	0.000154182191274101	1	152	standard ATAC-Seq in frozen liver
peak_55945	chr4	60311863	60312444	581	14.0826050207923	7.19792364678159	1.51430224288425	4.75329392174173	2.00129079728264e-06	0.000154182191274101	0.5	226	standard ATAC-Seq in frozen liver
peak_11608	chr11	33654782	33655168	386	14.0812077413141	7.19782052847401	1.51458836087188	4.75232790269863	2.01087908696855e-06	0.000154648617585589	0	150	standard ATAC-Seq in frozen liver
peak_80546	chr8_random	716388	716774	386	14.0812077413141	7.19782052847401	1.51458836087188	4.75232790269863	2.01087908696855e-06	0.000154648617585589	0	150.5	standard ATAC-Seq in frozen liver
peak_40671	chr19	5148986	5149237	251	14.0895914181833	7.19844085735714	1.51585085387619	4.74877910247565	2.04648318745714e-06	0.000157110668493914	0	97.5	standard ATAC-Seq in frozen liver
peak_60263	chr5	15165408	15165622	214	14.0909886976615	7.19854662164681	1.51676663627812	4.74598164903651	2.07497524966353e-06	0.000159158421450747	0	83.5	standard ATAC-Seq in frozen liver
peak_76373	chr8	19862977	19863327	350	17.9974619716428	3.39342231685084	0.716381824243722	4.73689058266274	2.17022259769366e-06	0.000164532451273918	12	158.5	standard ATAC-Seq in frozen liver
peak_30314	chr15	91737351	91738525	1174	13.8485702888602	7.17372669907286	1.51538253692578	4.73393781719698	2.20205215531904e-06	0.000166427046831379	0	447.5	standard ATAC-Seq in frozen liver
peak_884	chr1	46132778	46133157	379	13.8513648478166	7.17393592742923	1.51560956475539	4.733366755037	2.20825948189161e-06	0.000166547630353758	0	145.5	standard ATAC-Seq in frozen liver
peak_86343	chrX	72975299	72975626	327	13.847173009382	7.17362202736465	1.51557589041064	4.733264808944	2.20936938082831e-06	0.000166547630353758	0	124.5	standard ATAC-Seq in frozen liver
peak_77398	chr8	57993482	57993734	252	13.8527621272948	7.1740410890793	1.51603095555165	4.73212045097642	2.22186495306902e-06	0.000167057902772893	0	96.5	standard ATAC-Seq in frozen liver
peak_74118	chr7	113423258	113423985	727	13.8429811709474	7.17330418493165	1.51739911542444	4.72736810771449	2.2744870779398e-06	0.000170574836824519	1	278.5	standard ATAC-Seq in frozen liver
peak_76399	chr8	20036885	20037297	412	13.6159328364064	7.14922329141156	1.51665447908361	4.71381147783328	2.43125615947565e-06	0.00018038458435108	0	155	standard ATAC-Seq in frozen liver
peak_77397	chr8	57990665	57990988	323	13.6159328364064	7.14922329141156	1.51665447908361	4.71381147783328	2.43125615947565e-06	0.00018038458435108	0	122	standard ATAC-Seq in frozen liver
peak_34637	chr17	15160813	15161839	1026	13.6131382774499	7.14901059088832	1.51663174112771	4.71374190386692	2.4320868558173e-06	0.00018038458435108	0	388.5	standard ATAC-Seq in frozen liver
peak_80556	chr8_random	784104	784315	211	13.6131382774499	7.14901059088832	1.51663174112771	4.71374190386692	2.4320868558173e-06	0.00018038458435108	0	79.5	standard ATAC-Seq in frozen liver
peak_22348	chr13	66869691	66870115	424	13.6117409979717	7.1489039448225	1.51693804270011	4.71271979711026	2.44432201305975e-06	0.000181138542134611	1	159	standard ATAC-Seq in frozen liver
peak_17464	chr12	55839144	55840058	914	31.9446821790827	6.92501519122872	1.46985919597981	4.71134596440885	2.46086063491582e-06	0.000181902079313512	8	800	standard ATAC-Seq in frozen liver
peak_40236	chr18	78394942	78395194	252	13.3791035455179	7.12397190822518	1.51776127021933	4.69373678720612	2.68259153457541e-06	0.000195923552745023	0	92.5	standard ATAC-Seq in frozen liver
peak_85200	chrUn_random	3907228	3907954	726	13.3791035455179	7.12397190822518	1.51776127021933	4.69373678720612	2.68259153457541e-06	0.000195923552745023	1	268	standard ATAC-Seq in frozen liver
peak_65393	chr6	3000373	3001045	672	13.3846926634307	7.12440683124838	1.51912624696491	4.68980563365446	2.73464685969383e-06	0.000199112777465511	1	249	standard ATAC-Seq in frozen liver
peak_58992	chr4	138894076	138894424	348	13.3749117070833	7.12364527460562	1.51904580587448	4.68955264354567	2.73802988091639e-06	0.00019919338083784	0	128	standard ATAC-Seq in frozen liver
peak_76356	chr8	19735755	19736000	245	13.3860899429089	7.12451758812332	1.52002490899147	4.68710581384512	2.77095718245198e-06	0.000201087397720576	0	91	standard ATAC-Seq in frozen liver
peak_49797	chr2	181663864	181664150	286	31.0144633155911	6.88209115714617	1.47079703590095	4.67915761941314	2.88055941580676e-06	0.000207492740339088	1	245.5	standard ATAC-Seq in frozen liver
peak_80565	chr8_random	819433	819839	406	31.0144633155911	6.88209115714617	1.47079703590095	4.67915761941314	2.88055941580676e-06	0.000207492740339088	4	345.5	standard ATAC-Seq in frozen liver
peak_80908	chr9	21092155	21092772	617	13.1450688135858	7.09849091286962	1.51897038068486	4.67322536576987	2.96506102235074e-06	0.000212924668606623	0	223.5	standard ATAC-Seq in frozen liver
peak_85136	chrUn_random	2427705	2428021	316	13.146466093064	7.09860100077222	1.5190952274977	4.67291376621941	2.96956469540277e-06	0.00021302732178439	0	114	standard ATAC-Seq in frozen liver
peak_38990	chr18	43073454	43073808	354	13.1408769751512	7.0981593757377	1.51995786134623	4.66997115923388	3.01242025125145e-06	0.000215219598342266	0	128	standard ATAC-Seq in frozen liver
peak_74107	chr7	113100932	113101421	489	13.1408769751512	7.0981593757377	1.51995786134623	4.66997115923388	3.01242025125145e-06	0.000215219598342266	0	177.5	standard ATAC-Seq in frozen liver
peak_77390	chr8	56205639	56206958	1319	30.5488574643595	6.85982877253342	1.47146143097278	4.66191544551622	3.13279906307297e-06	0.000222729034281952	7	1107.5	standard ATAC-Seq in frozen liver
peak_60801	chr5	33068812	33069181	369	18.9950500756718	3.01889333727153	0.648543520817582	4.65488165461245	3.24166848054872e-06	0.000230095363949022	16	175	standard ATAC-Seq in frozen liver
peak_11110	chr11	12274960	12275310	350	18.3598048771506	5.09631821274868	1.09533082585624	4.65276617113809	3.27511567569223e-06	0.000231766356917356	3	172	standard ATAC-Seq in frozen liver
peak_22308	chr13	66486796	66487152	356	12.9110340816537	7.0725517280806	1.52026399491391	4.65218656216424	3.28433728656503e-06	0.000231766356917356	0	127	standard ATAC-Seq in frozen liver
peak_34630	chr17	15129589	15130796	1207	12.9110340816537	7.0725517280806	1.52026399491391	4.65218656216424	3.28433728656503e-06	0.000231766356917356	0	431	standard ATAC-Seq in frozen liver
peak_60268	chr5	15184079	15184523	444	12.9110340816537	7.0725517280806	1.52026399491391	4.65218656216424	3.28433728656503e-06	0.000231766356917356	1	158.5	standard ATAC-Seq in frozen liver
peak_60238	chr5	15021940	15022263	323	12.9096368021755	7.07243973450212	1.52025213764971	4.65214917930392	3.28493290400227e-06	0.000231766356917356	0	114	standard ATAC-Seq in frozen liver
peak_76368	chr8	19790456	19790760	304	12.9124313611319	7.07266391011302	1.52051042500048	4.65150635853799	3.29519112491723e-06	0.000231766356917356	0	108.5	standard ATAC-Seq in frozen liver
peak_60261	chr5	15160891	15161299	408	12.9082395226973	7.07232757776584	1.52047486558094	4.65139394136821	3.29698824669052e-06	0.000231766356917356	0	146.5	standard ATAC-Seq in frozen liver
peak_85225	chrUn_random	4252940	4253468	528	12.9082395226973	7.07232757776584	1.52047486558094	4.65139394136821	3.29698824669052e-06	0.000231766356917356	0.5	186	standard ATAC-Seq in frozen liver
peak_4778	chr1	173009550	173009767	217	12.9068422432191	7.0722149081332	1.52093353474057	4.64991713746355	3.32068416560274e-06	0.000232870959526752	0	76.5	standard ATAC-Seq in frozen liver
peak_43777	chr2	19430818	19431166	348	12.9068422432191	7.0722149081332	1.52093353474057	4.64991713746355	3.32068416560274e-06	0.000232870959526752	0	123.5	standard ATAC-Seq in frozen liver
peak_60264	chr5	15166547	15166754	207	12.9152259200884	7.07289022598314	1.52171368604498	4.64797700832013	3.35206265272197e-06	0.000234320424363877	0	74.5	standard ATAC-Seq in frozen liver
peak_80558	chr8_random	785707	786091	384	12.9152259200884	7.07289022598314	1.52171368604498	4.64797700832013	3.35206265272197e-06	0.000234320424363877	0	139	standard ATAC-Seq in frozen liver
peak_78011	chr8	75843418	75843772	354	12.9040476842627	7.0719866699505	1.5225709918206	4.64476645617307	3.40461374284204e-06	0.000237340735590142	1	124.5	standard ATAC-Seq in frozen liver
peak_87489	chrX	166445717	166445961	244	29.8439587096069	6.82586143921865	1.47220498287554	4.63648847722703	3.54377940601976e-06	0.000245759136161207	1	200	standard ATAC-Seq in frozen liver
peak_7522	chr10	57694543	57695537	994	18.1257701452185	5.07724874365584	1.09632554557525	4.63115063235323	3.63639186384263e-06	0.000251126628349242	6	483.5	standard ATAC-Seq in frozen liver
peak_55996	chr4	61107212	61107767	555	12.6756020702435	7.04602354343813	1.52150545724993	4.63095515685732	3.63982705829616e-06	0.000251126628349242	0	192.5	standard ATAC-Seq in frozen liver
peak_8815	chr10	81167207	81167998	791	12.6769993497217	7.04613760211709	1.52163896911467	4.63062378470546	3.64565754528372e-06	0.000251126628349242	0	277.5	standard ATAC-Seq in frozen liver
peak_85142	chrUn_random	2439955	2440168	213	12.6769993497217	7.04613760211709	1.52163896911467	4.63062378470546	3.64565754528372e-06	0.000251126628349242	0	75.5	standard ATAC-Seq in frozen liver
peak_60223	chr5	14970609	14970875	266	12.6742047907652	7.04590949765461	1.52161478905547	4.63054746071986	3.64700173255964e-06	0.000251126628349242	0	94	standard ATAC-Seq in frozen liver
peak_68875	chr6	114504444	114504758	314	12.6783966291999	7.04625203830355	1.52201603090738	4.62955178869095	3.66458069589367e-06	0.000252138709059684	0	112	standard ATAC-Seq in frozen liver
peak_16623	chr12	16754488	16754860	372	29.6029375802838	6.81415352052989	1.47212961035063	4.62877281498802	3.67839037764432e-06	0.000252493370557689	2	301	standard ATAC-Seq in frozen liver
peak_4776	chr1	173002563	173002856	293	12.6811911881563	7.04648346853874	1.52351090142447	4.62516117341223	3.74307224557454e-06	0.000254933805338863	0	103.5	standard ATAC-Seq in frozen liver
peak_76357	chr8	19737146	19737505	359	12.6811911881563	7.04648346853874	1.52351090142447	4.62516117341223	3.74307224557454e-06	0.000254933805338863	0	125.5	standard ATAC-Seq in frozen liver
peak_38172	chr18	13107633	13107986	353	29.5931566239364	6.81381412730132	1.47328142433903	4.62492366681284	3.74736380723593e-06	0.000255027630673002	2	284	standard ATAC-Seq in frozen liver
peak_34562	chr17	13613948	13614473	525	12.6825884676345	7.0466011496889	1.52463754906393	4.62182054614572	3.80387003369673e-06	0.000257870566598842	0	186.5	standard ATAC-Seq in frozen liver
peak_80148	chr8	126124597	126125076	479	12.6825884676345	7.0466011496889	1.52463754906393	4.62182054614572	3.80387003369673e-06	0.000257870566598842	1	166.5	standard ATAC-Seq in frozen liver
peak_80138	chr8	126081811	126082218	407	12.6686156728524	7.04544623987332	1.52451718270353	4.62142789848989	3.8110778893243e-06	0.000258159230492085	0	141.5	standard ATAC-Seq in frozen liver
peak_80143	chr8	126105164	126105393	229	12.9236095969576	7.07360674087258	1.5313615943217	4.61916164484048	3.85293617508272e-06	0.000260068027991311	0	84	standard ATAC-Seq in frozen liver
peak_76363	chr8	19766877	19767191	314	12.6839857471127	7.04672047098503	1.52601224937768	4.61773519436607	3.87950868446432e-06	0.000261579907978145	0	111.5	standard ATAC-Seq in frozen liver
peak_59602	chr4	149131110	149131569	459	12.4415673383114	7.01911456274589	1.52283834688513	4.60923155573476	4.04160003051889e-06	0.000270890539421385	0	158.5	standard ATAC-Seq in frozen liver
peak_80547	chr8_random	718088	718354	266	12.4401700588332	7.01899848190049	1.52282602811931	4.60919261445047	4.04235702515258e-06	0.000270890539421385	0	91.5	standard ATAC-Seq in frozen liver
peak_17484	chr12	56255668	56256601	933	12.4429646177896	7.01923084681242	1.52310254084215	4.60850839558797	4.05568000927496e-06	0.000271160472675122	0	326.5	standard ATAC-Seq in frozen liver
peak_60212	chr5	14928998	14929383	385	12.4429646177896	7.01923084681242	1.52310254084215	4.60850839558797	4.05568000927496e-06	0.000271160472675122	0	132.5	standard ATAC-Seq in frozen liver
peak_80543	chr8_random	709353	709639	286	12.4429646177896	7.01923084681242	1.52310254084215	4.60850839558797	4.05568000927496e-06	0.000271160472675122	0	97.5	standard ATAC-Seq in frozen liver
peak_30319	chr15	93064723	93065099	376	12.4443618972678	7.01934771122531	1.52362014359965	4.6070194993889	4.0848170958525e-06	0.000272276547914635	1	130	standard ATAC-Seq in frozen liver
peak_60276	chr5	15216166	15216430	264	12.4443618972678	7.01934771122531	1.52362014359965	4.6070194993889	4.0848170958525e-06	0.000272276547914635	0	91.5	standard ATAC-Seq in frozen liver
peak_67289	chr6	69466250	69466649	399	12.4373754998768	7.01876541023238	1.52355861251443	4.6068233624756	4.08867033594159e-06	0.000272325981074027	2	137.5	standard ATAC-Seq in frozen liver
peak_60269	chr5	15184967	15185195	228	12.445759176746	7.01946552462163	1.52439425944564	4.6047572543171	4.12947259051787e-06	0.000274000994427243	0	78.5	standard ATAC-Seq in frozen liver
peak_37764	chr18	3010239	3010612	373	28.8997670513332	6.77934906912095	1.47313486551561	4.60198806492039	4.18477189746433e-06	0.000277040129874569	2	295	standard ATAC-Seq in frozen liver
peak_80564	chr8_random	818653	818976	323	28.9053561692461	6.77954813386867	1.47387864646712	4.59980077065316	4.22895196777635e-06	0.00027933105454175	2.5	255.5	standard ATAC-Seq in frozen liver
peak_80567	chr8_random	824336	825152	816	12.4485537357024	7.01970541476368	1.52674931357892	4.59781141038046	4.26952188816156e-06	0.000281798104170446	0	285.5	standard ATAC-Seq in frozen liver
peak_34770	chr17	23668626	23669001	375	12.2061353269011	6.99157580889466	1.52411741056685	4.58729475854118	4.49026502862242e-06	0.000293907542029141	0.5	127	standard ATAC-Seq in frozen liver
peak_66656	chr6	48071159	48071510	351	12.2061353269011	6.99157580889466	1.52411741056685	4.58729475854118	4.49026502862242e-06	0.000293907542029141	1	117.5	standard ATAC-Seq in frozen liver
peak_6824	chr10	29690636	29690979	343	12.2075326063793	6.99169408599334	1.52426043538097	4.58694191865306	4.49785745395465e-06	0.000293907542029141	0	115	standard ATAC-Seq in frozen liver
peak_3184	chr1	133470396	133470607	211	12.2047380474229	6.99145754506151	1.52423536463047	4.58686217843823	4.4995750106692e-06	0.000293907542029141	0	72	standard ATAC-Seq in frozen liver
peak_60252	chr5	15127460	15128016	556	12.2089298858575	6.99181277169691	1.52466525672104	4.58580186101542	4.52247342729124e-06	0.000294502410876889	0	188.5	standard ATAC-Seq in frozen liver
peak_34632	chr17	15146083	15146464	381	12.2033407679447	6.99133889855415	1.52461514010526	4.58564178896416	4.52593999736532e-06	0.000294502410876889	0	127	standard ATAC-Seq in frozen liver
peak_68878	chr6	114514237	114514458	221	12.2033407679447	6.99133889855415	1.52461514010526	4.58564178896416	4.52593999736532e-06	0.000294502410876889	0	74	standard ATAC-Seq in frozen liver
peak_80557	chr8_random	785390	785609	219	12.2033407679447	6.99133889855415	1.52461514010526	4.58564178896416	4.52593999736532e-06	0.000294502410876889	0	73	standard ATAC-Seq in frozen liver
peak_4779	chr1	173010135	173010450	315	12.2103271653357	6.99193225508898	1.52533436494189	4.58386857058409	4.56451204996305e-06	0.000296131601260724	0	106.5	standard ATAC-Seq in frozen liver
peak_60236	chr5	15007629	15008330	701	12.2103271653357	6.99193225508898	1.52533436494189	4.58386857058409	4.56451204996305e-06	0.000296131601260724	1	238.5	standard ATAC-Seq in frozen liver
peak_85171	chrUn_random	3558833	3559208	375	12.2005462089883	6.99109890339181	1.52617194946858	4.58080683885335	4.63185500379424e-06	0.000299390929155885	0	125	standard ATAC-Seq in frozen liver
peak_19966	chr13	3373372	3373644	272	27.9552444467357	6.73105894451178	1.4743580528789	4.56541674620245	4.98503009878549e-06	0.00032079768324677	1	208	standard ATAC-Seq in frozen liver
peak_68874	chr6	114501984	114502344	360	11.972100594969	6.96362167453505	1.52549895432572	4.56481576391051	4.99933191423351e-06	0.000321072381020059	0	118	standard ATAC-Seq in frozen liver
peak_62916	chr5	106605655	106606023	368	11.9707033154908	6.96350124320839	1.52548621063418	4.5647749515307	5.00030456621237e-06	0.000321072381020059	0	122.5	standard ATAC-Seq in frozen liver
peak_67879	chr6	87407241	87408057	816	11.9707033154908	6.96350124320839	1.52548621063418	4.5647749515307	5.00030456621237e-06	0.000321072381020059	4	271	standard ATAC-Seq in frozen liver
peak_85238	chrUn_random	4531414	4531775	361	11.9734978744472	6.96374232592107	1.52578266625809	4.56404603350182	5.0177068956986e-06	0.000321953584900767	1	118.5	standard ATAC-Seq in frozen liver
peak_80139	chr8	126084872	126085148	276	11.9762924334037	6.96398591887781	1.52717193544982	4.56005362410397	5.11405598577873e-06	0.000327176217704217	0	92	standard ATAC-Seq in frozen liver
peak_60231	chr5	14990647	14991097	450	11.9776897128819	6.96410965024582	1.52828660247717	4.556808676434	5.193669179629e-06	0.000331784476592665	0	148	standard ATAC-Seq in frozen liver
peak_60208	chr5	14914777	14915107	330	11.9804842718383	6.96436267590824	1.53138394585257	4.54775740255719	5.42205847360345e-06	0.000345366183079549	0	109.5	standard ATAC-Seq in frozen liver
peak_49488	chr2	172896771	172897209	438	16.3197796367748	3.52637862517307	0.775456334756556	4.54748832025484	5.42899321962505e-06	0.000345556405518811	10	182	standard ATAC-Seq in frozen liver
peak_85244	chrUn_random	4763241	4763573	332	11.7366685835588	6.93499232932422	1.52682860000289	4.54208961589474	5.5699352514403e-06	0.000353384331415994	0	107.5	standard ATAC-Seq in frozen liver
peak_9369	chr10	94055044	94055394	350	11.7352713040805	6.93486956470323	1.52695618794686	4.54162969405678	5.58210284429594e-06	0.000353758188870338	0	114.5	standard ATAC-Seq in frozen liver
peak_43233	chr1_random	1033572	1033993	421	11.7394631425152	6.93523832996031	1.52741751426749	4.54049941497904	5.6121134601029e-06	0.000354632893801261	1	137.5	standard ATAC-Seq in frozen liver
peak_60273	chr5	15195983	15196728	745	11.7394631425152	6.93523832996031	1.52741751426749	4.54049941497904	5.6121134601029e-06	0.000354632893801261	1	244	standard ATAC-Seq in frozen liver
peak_80525	chr8_random	375508	376054	546	11.7394631425152	6.93523832996031	1.52741751426749	4.54049941497904	5.6121134601029e-06	0.000354632893801261	0	176	standard ATAC-Seq in frozen liver
peak_60255	chr5	15138223	15138599	376	11.7338740246023	6.9347463825471	1.52736579922261	4.5403310628513	5.61659665734942e-06	0.000354660117499685	0	121	standard ATAC-Seq in frozen liver
peak_7406	chr10	52249422	52249896	474	11.7408604219934	6.93536242022251	1.52813786725891	4.53844026040842	5.66718455370995e-06	0.000356824694213051	0	155	standard ATAC-Seq in frozen liver
peak_84675	chr9	115259811	115260182	371	27.2545375304177	6.69403451187321	1.47528017163971	4.53746660502668	5.69340426441803e-06	0.000357446949653947	1	278.5	standard ATAC-Seq in frozen liver
peak_5616	chr1	192944691	192945044	353	11.7310794656459	6.93449707330964	1.529044807893	4.53518238151912	5.75537297889695e-06	0.000360819833624701	1	114.5	standard ATAC-Seq in frozen liver
peak_80544	chr8_random	709753	710484	731	11.7436549809498	6.93561480927916	1.53045502167648	4.53173383800708	5.85015309568997e-06	0.000365192260186655	0	240	standard ATAC-Seq in frozen liver
peak_65445	chr6	4873716	4874330	614	27.0177082395292	6.6813570187866	1.47563421080704	4.52778674406885	5.96046891370435e-06	0.000371284184240919	3	454.5	standard ATAC-Seq in frozen liver
peak_76366	chr8	19783838	19784201	363	27.0257609700746	6.68143290932672	1.47583226955533	4.52723053097345	5.9761734315557e-06	0.000371743209636242	2	268.5	standard ATAC-Seq in frozen liver
peak_60254	chr5	15136741	15136949	208	11.745052260428	6.9357438273937	1.53205862569028	4.52707468963125	5.98058066440235e-06	0.000371743209636242	0	69	standard ATAC-Seq in frozen liver
peak_85085	chr9	123782086	123782440	354	11.5012365721485	6.90578346711502	1.52826134176556	4.51871893791213	6.22149180207949e-06	0.000385622337837248	0	114	standard ATAC-Seq in frozen liver
peak_34701	chr17	17257805	17258776	971	11.5040311311049	6.90603387651288	1.52857973040766	4.51794155001067	6.24437149565966e-06	0.000386219893235786	0	307.5	standard ATAC-Seq in frozen liver
peak_76358	chr8	19751748	19752238	490	11.5040311311049	6.90603387651288	1.52857973040766	4.51794155001067	6.24437149565966e-06	0.000386219893235786	0	157.5	standard ATAC-Seq in frozen liver
peak_56012	chr4	61263282	61263781	499	11.5054284105831	6.90615988736797	1.52917924738459	4.51625268861047	6.29435499275863e-06	0.000388487767708916	0	158.5	standard ATAC-Seq in frozen liver
peak_86506	chrX	92042878	92043998	1120	11.5054284105831	6.90615988736797	1.52917924738459	4.51625268861047	6.29435499275863e-06	0.000388487767708916	0	357.5	standard ATAC-Seq in frozen liver
peak_37788	chr18	4195340	4195645	305	11.5068256900613	6.90628702210858	1.53007721362617	4.51368529679702	6.37107346767244e-06	0.000392168030630608	0	98	standard ATAC-Seq in frozen liver
peak_60256	chr5	15140024	15140224	200	11.5068256900613	6.90628702210858	1.53007721362617	4.51368529679702	6.37107346767244e-06	0.000392168030630608	0.5	64.5	standard ATAC-Seq in frozen liver
peak_87488	chrX	166445088	166445288	200	26.796249022901	6.66916098578142	1.47794184587089	4.51246509083824	6.40784839232094e-06	0.000393826182196304	1	147.5	standard ATAC-Seq in frozen liver
peak_4777	chr1	173006411	173006667	256	11.5082229695395	6.90641570676169	1.5312800721055	4.51022372234323	6.47592922351865e-06	0.000397452208774985	0	83	standard ATAC-Seq in frozen liver
peak_60275	chr5	15209157	15209520	363	11.5082229695395	6.90641570676169	1.5312800721055	4.51022372234323	6.47592922351865e-06	0.000397452208774985	0	115.5	standard ATAC-Seq in frozen liver
peak_69380	chr6	122565516	122566330	814	15.5981290886539	3.80341697851491	0.845383903653257	4.49904115997331	6.82606416913482e-06	0.00041660412135182	20	331.5	standard ATAC-Seq in frozen liver
peak_5739	chr1	194277784	194278160	376	26.3100149258202	6.64274918948347	1.47700099578686	4.49745748881137	6.87709058185648e-06	0.000419133767850625	3	271.5	standard ATAC-Seq in frozen liver
peak_71360	chr7	26804826	26805293	467	11.2672018402164	6.87609868874382	1.52967243287763	4.49514454268386	6.95227050144239e-06	0.000423219253145225	1	145.5	standard ATAC-Seq in frozen liver
peak_34702	chr17	17315669	17316749	1080	11.2685991196946	6.87622629552087	1.52983739616727	4.49474324052217	6.96539418397332e-06	0.000423219253145225	0	334.5	standard ATAC-Seq in frozen liver
peak_74109	chr7	113174817	113175673	856	11.2685991196946	6.87622629552087	1.52983739616727	4.49474324052217	6.96539418397332e-06	0.000423219253145225	1	267	standard ATAC-Seq in frozen liver
peak_25510	chr14	51870285	51870498	213	11.2658045607382	6.87597109590519	1.52981086312834	4.49465437959068	6.96830338306275e-06	0.000423219253145225	0	66	standard ATAC-Seq in frozen liver
peak_8817	chr10	81326305	81327157	852	11.2699963991728	6.87635438711306	1.53030686885463	4.49344803128258	7.00791292788455e-06	0.000425035018389139	3	267	standard ATAC-Seq in frozen liver
peak_44935	chr2	41751532	41751946	414	11.2699963991728	6.87635438711306	1.53030686885463	4.49344803128258	7.00791292788455e-06	0.000425035018389139	0	129.5	standard ATAC-Seq in frozen liver
peak_2019	chr1	85323792	85324160	368	11.2727909581292	6.87661386689608	1.53217528020304	4.48813784933587	7.18484346472512e-06	0.000433657340607783	0	115.5	standard ATAC-Seq in frozen liver
peak_60241	chr5	15025056	15025258	202	11.2727909581292	6.87661386689608	1.53217528020304	4.48813784933587	7.18484346472512e-06	0.000433657340607783	0	64	standard ATAC-Seq in frozen liver
peak_64298	chr5	134854662	134854966	304	16.7243563125825	4.95739458482862	1.10510021130585	4.48592311729872	7.25989186604786e-06	0.000436386316088354	2	137.5	standard ATAC-Seq in frozen liver
peak_76380	chr8	19908522	19909540	1018	11.2741882376074	6.87674610441006	1.53358824910159	4.48408893876086	7.32261178394872e-06	0.000439854262676327	0.5	315	standard ATAC-Seq in frozen liver
peak_60277	chr5	15217589	15218013	424	11.0331671082843	6.84579011162371	1.53120379190562	4.47085498861256	7.79075118403949e-06	0.000461736573307432	0	129	standard ATAC-Seq in frozen liver
peak_7524	chr10	57701857	57702501	644	11.0317698288061	6.8456600197742	1.53119039253567	4.47080915158938	7.79242128880673e-06	0.000461736573307432	0	198	standard ATAC-Seq in frozen liver
peak_34634	chr17	15155953	15156394	441	11.0317698288061	6.8456600197742	1.53119039253567	4.47080915158938	7.79242128880673e-06	0.000461736573307432	0	135	standard ATAC-Seq in frozen liver
peak_33559	chr16	86821040	86821406	366	11.0345643877625	6.84592046468624	1.53153304715802	4.46997893867836	7.82273000091034e-06	0.000462891188927496	1	113	standard ATAC-Seq in frozen liver
peak_56622	chr4	88910523	88910883	360	11.0303725493279	6.84552969468336	1.53149286224138	4.46984107040808	7.8277740789165e-06	0.000462891188927496	0	111	standard ATAC-Seq in frozen liver
peak_84168	chr9	105721518	105722012	494	11.0303725493279	6.84552969468336	1.53149286224138	4.46984107040808	7.8277740789165e-06	0.000462891188927496	0	150	standard ATAC-Seq in frozen liver
peak_43226	chr1_random	872822	873079	257	11.0359616672407	6.8460515692167	1.5321805986207	4.46817534132703	7.88896306092272e-06	0.000466168734026317	0	78.5	standard ATAC-Seq in frozen liver
peak_34340	chr17	7146083	7146542	459	11.0289752698497	6.84539864451345	1.53211366967016	4.46794436994166	7.89748358935721e-06	0.000466168734026317	0	137	standard ATAC-Seq in frozen liver
peak_60802	chr5	33071469	33071777	308	16.4871960753702	4.93556251559253	1.10533046149029	4.46523703774348	7.99801522457894e-06	0.000470731872521805	3	136	standard ATAC-Seq in frozen liver
peak_59429	chr4	146790547	146790800	253	10.7977350968741	6.81469819262095	1.53269414331793	4.44622185210984	8.73936955259667e-06	0.000510247420863047	0	75.5	standard ATAC-Seq in frozen liver
peak_53016	chr3	115609356	115610441	1085	10.7963378173958	6.81456538821313	1.53284487648017	4.44569799121567	8.76069520120583e-06	0.000510470894350421	2	328.5	standard ATAC-Seq in frozen liver
peak_80575	chr8_random	848364	848617	253	10.7963378173958	6.81456538821313	1.53284487648017	4.44569799121567	8.76069520120583e-06	0.000510470894350421	0	75	standard ATAC-Seq in frozen liver
peak_85356	chrX	4664863	4665071	208	10.7963378173958	6.81456538821313	1.53284487648017	4.44569799121567	8.76069520120583e-06	0.000510470894350421	0	61	standard ATAC-Seq in frozen liver
peak_68862	chr6	114456979	114457265	286	10.8005296558305	6.81496436115478	1.53337939118768	4.44440847471951	8.8134016977474e-06	0.000510598231306018	0	85	standard ATAC-Seq in frozen liver
peak_85128	chrUn_random	2382650	2382964	314	10.8005296558305	6.81496436115478	1.53337939118768	4.44440847471951	8.8134016977474e-06	0.000510598231306018	0	93	standard ATAC-Seq in frozen liver
peak_85257	chrUn_random	5102105	5102398	293	10.8005296558305	6.81496436115478	1.53337939118768	4.44440847471951	8.8134016977474e-06	0.000510598231306018	0	87.5	standard ATAC-Seq in frozen liver
peak_85313	chrUn_random	5880667	5881155	488	10.8005296558305	6.81496436115478	1.53337939118768	4.44440847471951	8.8134016977474e-06	0.000510598231306018	1	144	standard ATAC-Seq in frozen liver
peak_85141	chrUn_random	2438458	2438658	200	10.7949405379176	6.8144320800109	1.5333254195539	4.44421777211094	8.82122197162558e-06	0.000510598231306018	0	59.5	standard ATAC-Seq in frozen liver
peak_80526	chr8_random	381998	382284	286	15.0383058612155	7.29246125469779	1.64124017050009	4.44326271424112	8.86048655396218e-06	0.000512439335726716	0	122	standard ATAC-Seq in frozen liver
peak_80519	chr8_random	128814	129042	228	10.8019269353087	6.81509875177917	1.5342206901543	4.4420589524795	8.91021385760728e-06	0.000514388526783596	0	68	standard ATAC-Seq in frozen liver
peak_82801	chr9	65722307	65722517	210	10.8019269353087	6.81509875177917	1.5342206901543	4.4420589524795	8.91021385760728e-06	0.000514388526783596	0	64	standard ATAC-Seq in frozen liver
peak_7519	chr10	57687932	57688358	426	24.9124619852949	6.56276746696869	1.4792232812058	4.43663073070282	9.13778489936311e-06	0.000522357803140013	3	291	standard ATAC-Seq in frozen liver
peak_43223	chr1_random	844806	845127	321	15.6239999457219	3.4564711811979	0.781566217760269	4.42249306924127	9.75684801121074e-06	0.000554126918295362	9	125.5	standard ATAC-Seq in frozen liver
peak_10689	chr10	129172391	129172730	339	10.563700364942	6.78305711629678	1.53433954239836	4.42083184905346	9.8321663970125e-06	0.000555449303828118	0	99	standard ATAC-Seq in frozen liver
peak_34638	chr17	15177446	15177839	393	10.563700364942	6.78305711629678	1.53433954239836	4.42083184905346	9.8321663970125e-06	0.000555449303828118	0	115.5	standard ATAC-Seq in frozen liver
peak_54382	chr4	3103005	3103273	268	10.563700364942	6.78305711629678	1.53433954239836	4.42083184905346	9.8321663970125e-06	0.000555449303828118	0.5	78.5	standard ATAC-Seq in frozen liver
peak_85088	chr9	123839735	123840497	762	10.563700364942	6.78305711629678	1.53433954239836	4.42083184905346	9.8321663970125e-06	0.000555449303828118	0	219	standard ATAC-Seq in frozen liver
peak_85299	chrUn_random	5554719	5554923	204	10.5623030854638	6.78292160190604	1.53432597268314	4.42078262550979	9.83440660262427e-06	0.000555449303828118	0	59	standard ATAC-Seq in frozen liver
peak_34766	chr17	23013276	23013631	355	24.66059356647	6.54850186099147	1.48144051566372	4.42036098766853	9.85361568609454e-06	0.000555449303828118	2	238	standard ATAC-Seq in frozen liver
peak_858	chr1	44257951	44258164	213	10.5650976444202	6.78319291695302	1.53469566390497	4.41989449536428	9.87491001933185e-06	0.000555449303828118	0	63	standard ATAC-Seq in frozen liver
peak_4774	chr1	172995847	172996241	394	10.5650976444202	6.78319291695302	1.53469566390497	4.41989449536428	9.87491001933185e-06	0.000555449303828118	1	115	standard ATAC-Seq in frozen liver
peak_74110	chr7	113198558	113199030	472	10.5650976444202	6.78319291695302	1.53469566390497	4.41989449536428	9.87491001933185e-06	0.000555449303828118	0	139.5	standard ATAC-Seq in frozen liver
peak_80534	chr8_random	601226	601951	725	10.5650976444202	6.78319291695302	1.53469566390497	4.41989449536428	9.87491001933185e-06	0.000555449303828118	0	211	standard ATAC-Seq in frozen liver
peak_2203	chr1	89938940	89939166	226	10.5609058059856	6.7827858295144	1.53465496965712	4.4197464339687	9.88167787635119e-06	0.000555449303828118	0	66.5	standard ATAC-Seq in frozen liver
peak_30993	chr16	3234560	3234774	214	10.5609058059856	6.7827858295144	1.53465496965712	4.4197464339687	9.88167787635119e-06	0.000555449303828118	0	62.5	standard ATAC-Seq in frozen liver
peak_72569	chr7	71628426	71628736	310	10.5609058059856	6.7827858295144	1.53465496965712	4.4197464339687	9.88167787635119e-06	0.000555449303828118	0	90.5	standard ATAC-Seq in frozen liver
peak_23290	chr13	103156847	103157091	244	10.5664949238984	6.78332954360331	1.53539722260557	4.41796392733602	9.96350442106739e-06	0.00055925501169874	0	72.5	standard ATAC-Seq in frozen liver
peak_76379	chr8	19906562	19907277	715	10.5664949238984	6.78332954360331	1.53539722260557	4.41796392733602	9.96350442106739e-06	0.00055925501169874	0	212.5	standard ATAC-Seq in frozen liver
peak_55932	chr4	60160329	60160610	281	10.5595085265074	6.7826492576871	1.53532945075598	4.41771585528266	9.97494342099124e-06	0.00055925501169874	0	81.5	standard ATAC-Seq in frozen liver
peak_60210	chr5	14921582	14921792	210	10.5595085265074	6.7826492576871	1.53532945075598	4.41771585528266	9.97494342099124e-06	0.00055925501169874	0	61	standard ATAC-Seq in frozen liver
peak_85228	chrUn_random	4261601	4261966	365	10.5581112470292	6.78251135508846	1.53635531046434	4.41467628542159	1.01161252284697e-05	0.000565359619329781	0	105.5	standard ATAC-Seq in frozen liver
peak_76397	chr8	20003029	20003298	269	24.4332142856051	6.53461357949382	1.48048447381867	4.41383458932119	1.01555564513763e-05	0.000567201113636248	1	180	standard ATAC-Seq in frozen liver
peak_20566	chr13	25142184	25142593	409	10.5567139675509	6.7823716245215	1.53774159299244	4.41060556300816	1.03081938048053e-05	0.000574625995925324	0	117.5	standard ATAC-Seq in frozen liver
peak_85253	chrUn_random	5090558	5090800	242	10.3282683535317	6.75056790423357	1.53595470649053	4.39503057981298	1.10757160947827e-05	0.000611993269367744	0	69	standard ATAC-Seq in frozen liver
peak_23929	chr13_random	225001	226067	1066	10.3296656330099	6.75070638861319	1.53614672151537	4.39457136096597	1.10991539671176e-05	0.000611993269367744	0	303	standard ATAC-Seq in frozen liver
peak_60209	chr5	14918759	14919240	481	10.3296656330099	6.75070638861319	1.53614672151537	4.39457136096597	1.10991539671176e-05	0.000611993269367744	0	135	standard ATAC-Seq in frozen liver
peak_80524	chr8_random	374817	375334	517	10.3296656330099	6.75070638861319	1.53614672151537	4.39457136096597	1.10991539671176e-05	0.000611993269367744	0	146.5	standard ATAC-Seq in frozen liver
peak_50709	chr3	47287636	47288090	454	10.3268710740535	6.75042943406632	1.53611953138095	4.39446885230201	1.11043923234495e-05	0.000611993269367744	1	130	standard ATAC-Seq in frozen liver
peak_59441	chr4	146893399	146894022	623	10.3268710740535	6.75042943406632	1.53611953138095	4.39446885230201	1.11043923234495e-05	0.000611993269367744	2	178.5	standard ATAC-Seq in frozen liver
peak_72566	chr7	71620430	71620924	494	10.3310629124881	6.75084545779211	1.53669713632497	4.39308781035203	1.11751962810965e-05	0.000614544141325962	0	141	standard ATAC-Seq in frozen liver
peak_40547	chr19	4063108	4063455	347	10.3254737945753	6.7502904067843	1.53664278934466	4.39288197204448	1.11857861393784e-05	0.000614544141325962	0.5	99.5	standard ATAC-Seq in frozen liver
peak_43211	chr1_random	535328	535573	245	10.3254737945753	6.7502904067843	1.53664278934466	4.39288197204448	1.11857861393784e-05	0.000614544141325962	0.5	69	standard ATAC-Seq in frozen liver
peak_80523	chr8_random	374138	374482	344	10.3254737945753	6.7502904067843	1.53664278934466	4.39288197204448	1.11857861393784e-05	0.000614544141325962	0	97	standard ATAC-Seq in frozen liver
peak_85137	chrUn_random	2428784	2428998	214	10.5734813212894	6.78404234115018	1.54438645600994	4.3927103315043	1.11946239337546e-05	0.000614643846962526	0	64.5	standard ATAC-Seq in frozen liver
peak_59430	chr4	146791346	146791589	243	10.3240765150971	6.75015025754019	1.5375292688765	4.39025805503699	1.13216222515427e-05	0.00062006073706681	0.5	68.5	standard ATAC-Seq in frozen liver
peak_85140	chrUn_random	2436576	2437089	513	10.3338574714445	6.75112758648291	1.5388954941724	4.38699548607982	1.14927173865707e-05	0.00062746795568015	0	150	standard ATAC-Seq in frozen liver
peak_40325	chr18	82390247	82390908	661	23.7300437566545	6.49226663495824	1.48139006756473	4.38255040121263	1.17298018085161e-05	0.000636441738672982	3	429.5	standard ATAC-Seq in frozen liver
peak_7521	chr10	57693984	57694329	345	23.5026644757897	6.4778218599725	1.48179137396081	4.37161531225369	1.23330684549509e-05	0.00066546104692284	2	220	standard ATAC-Seq in frozen liver
peak_20363	chr13	21901750	21902658	908	10.0942336215996	6.71747178321493	1.53775255754026	4.36836976812444	1.25177425763352e-05	0.000672687658462263	0	251.5	standard ATAC-Seq in frozen liver
peak_34365	chr17	8138204	8139044	840	10.0928363421214	6.71733035060476	1.53773898116691	4.36831636114689	1.25208034327978e-05	0.000672687658462263	0	235.5	standard ATAC-Seq in frozen liver
peak_38063	chr18	11429824	11430350	526	10.0928363421214	6.71733035060476	1.53773898116691	4.36831636114689	1.25208034327978e-05	0.000672687658462263	0	147.5	standard ATAC-Seq in frozen liver
peak_77399	chr8	57997368	57997666	298	10.0928363421214	6.71733035060476	1.53773898116691	4.36831636114689	1.25208034327978e-05	0.000672687658462263	0	84	standard ATAC-Seq in frozen liver
peak_85305	chrUn_random	5730622	5731007	385	10.0928363421214	6.71733035060476	1.53773898116691	4.36831636114689	1.25208034327978e-05	0.000672687658462263	0	108	standard ATAC-Seq in frozen liver
peak_86505	chrX	91969385	91971135	1750	10.0928363421214	6.71733035060476	1.53773898116691	4.36831636114689	1.25208034327978e-05	0.000672687658462263	7	487.5	standard ATAC-Seq in frozen liver
peak_49796	chr2	181663009	181663209	200	23.5096508731807	6.47812726672696	1.48322465713993	4.36759680035159	1.25621125400428e-05	0.000673641454358968	1	130.5	standard ATAC-Seq in frozen liver
peak_17953	chr12	75904791	75905588	797	10.0956309010778	6.71761353068765	1.53813904676939	4.36736428009997	1.25754890229394e-05	0.000673641454358968	0	222.5	standard ATAC-Seq in frozen liver
peak_71947	chr7	39204585	39205044	459	10.0956309010778	6.71761353068765	1.53813904676939	4.36736428009997	1.25754890229394e-05	0.000673641454358968	2	128.5	standard ATAC-Seq in frozen liver
peak_76404	chr8	22128883	22129097	214	10.0956309010778	6.71761353068765	1.53813904676939	4.36736428009997	1.25754890229394e-05	0.000673641454358968	0	59	standard ATAC-Seq in frozen liver
peak_22405	chr13	68373587	68373940	353	10.0914390626432	6.7171886312652	1.53809833596012	4.36720362685535	1.25847390609686e-05	0.000673641454358968	0	98.5	standard ATAC-Seq in frozen liver
peak_85127	chrUn_random	2378029	2378239	210	10.0914390626432	6.7171886312652	1.53809833596012	4.36720362685535	1.25847390609686e-05	0.000673641454358968	0	58	standard ATAC-Seq in frozen liver
peak_68860	chr6	114452310	114452550	240	10.097028180556	6.71775618973374	1.53890188325844	4.36529207145401	1.2695301350953e-05	0.000678315066504308	0	67	standard ATAC-Seq in frozen liver
peak_30992	chr16	3232702	3232933	231	10.0984254600342	6.71790034528066	1.54004804927421	4.36213684920199	1.28798261158494e-05	0.000686916210745291	0	65.5	standard ATAC-Seq in frozen liver
peak_60234	chr5	15004678	15005090	412	10.0984254600342	6.71790034528066	1.54004804927421	4.36213684920199	1.28798261158494e-05	0.000686916210745291	0	114	standard ATAC-Seq in frozen liver
peak_59428	chr4	146787740	146787940	200	10.1012200189907	6.71819526265169	1.54353020445845	4.35248707362274	1.3460181056776e-05	0.000713520039920034	0	56	standard ATAC-Seq in frozen liver
peak_56337	chr4	79649672	79650027	355	23.0195558839891	6.44804110507652	1.48421813072333	4.34440259932285	1.39655188975157e-05	0.000736737943575451	1	223	standard ATAC-Seq in frozen liver
peak_20368	chr13	21924993	21925919	926	9.85880161018935	6.68345375834504	1.5395363810984	4.34121196510905	1.41698943888897e-05	0.00074419682395176	0	249.5	standard ATAC-Seq in frozen liver
peak_65442	chr6	4712303	4712678	375	9.85880161018935	6.68345375834504	1.5395363810984	4.34121196510905	1.41698943888897e-05	0.00074419682395176	0	102	standard ATAC-Seq in frozen liver
peak_74119	chr7	113440397	113440858	461	9.85880161018935	6.68345375834504	1.5395363810984	4.34121196510905	1.41698943888897e-05	0.00074419682395176	0	127.5	standard ATAC-Seq in frozen liver
peak_80554	chr8_random	749304	749569	265	9.85880161018935	6.68345375834504	1.5395363810984	4.34121196510905	1.41698943888897e-05	0.00074419682395176	0	72	standard ATAC-Seq in frozen liver
peak_47171	chr2	121262213	121262500	287	9.86019888966756	6.683598453302	1.53974451321956	4.34071912315298	1.4201716511452e-05	0.00074419682395176	0	78	standard ATAC-Seq in frozen liver
peak_68877	chr6	114511169	114511371	202	9.86019888966756	6.683598453302	1.53974451321956	4.34071912315298	1.4201716511452e-05	0.00074419682395176	0	54	standard ATAC-Seq in frozen liver
peak_23937	chr13_random	325850	326745	895	9.85740433071114	6.68330907738246	1.5397175209691	4.34060727787001	1.42089476893405e-05	0.00074419682395176	0	242	standard ATAC-Seq in frozen liver
peak_60225	chr5	14971884	14972480	596	9.85740433071114	6.68330907738246	1.5397175209691	4.34060727787001	1.42089476893405e-05	0.00074419682395176	1	163	standard ATAC-Seq in frozen liver
peak_27164	chr14	119686029	119686375	346	9.86159616914577	6.68374379427471	1.54034377894938	4.33912473670876	1.43051313960357e-05	0.000746999280817213	0	94	standard ATAC-Seq in frozen liver
peak_76370	chr8	19801577	19802711	1134	9.86159616914577	6.68374379427471	1.54034377894938	4.33912473670876	1.43051313960357e-05	0.000746999280817213	3	307	standard ATAC-Seq in frozen liver
peak_85254	chrUn_random	5091072	5091337	265	9.86159616914577	6.68374379427471	1.54034377894938	4.33912473670876	1.43051313960357e-05	0.000746999280817213	0	71.5	standard ATAC-Seq in frozen liver
peak_85265	chrUn_random	5176870	5177340	470	9.86159616914577	6.68374379427471	1.54034377894938	4.33912473670876	1.43051313960357e-05	0.000746999280817213	0	129.5	standard ATAC-Seq in frozen liver
peak_22332	chr13	66694228	66694428	200	9.86299344862397	6.68389040407154	1.54133985696541	4.3364157319793	1.44824912353121e-05	0.000754011392280356	0	54.5	standard ATAC-Seq in frozen liver
peak_60246	chr5	15052670	15052985	315	9.86299344862397	6.68389040407154	1.54133985696541	4.3364157319793	1.44824912353121e-05	0.000754011392280356	0	88	standard ATAC-Seq in frozen liver
peak_32721	chr16	41705795	41706119	324	9.85460977175473	6.68301723323769	1.54125905611728	4.33607653866669	1.45048455404731e-05	0.000754455056888724	0	88.5	standard ATAC-Seq in frozen liver
peak_34640	chr17	15187272	15187729	457	9.85321249227652	6.68286883729666	1.542634907897	4.33211306387918	1.47685062498679e-05	0.000763452391306667	0	124.5	standard ATAC-Seq in frozen liver
peak_80545	chr8_random	710904	711253	349	9.85321249227652	6.68286883729666	1.542634907897	4.33211306387918	1.47685062498679e-05	0.000763452391306667	0	94	standard ATAC-Seq in frozen liver
peak_86511	chrX	92139963	92140183	220	9.86578800758039	6.68418972621881	1.54454780372867	4.32760301110952	1.50740850820411e-05	0.000776441157589637	0	61	standard ATAC-Seq in frozen liver
peak_85294	chrUn_random	5484851	5485067	216	9.85181521279832	6.68271800121892	1.5444470439874	4.3269324301115	1.51200319550006e-05	0.000777948310799352	0	57.5	standard ATAC-Seq in frozen liver
peak_76405	chr8	22130821	22131026	205	15.6456054701725	3.17020153409472	0.732846650124163	4.32587299615493	1.51928944895884e-05	0.000781219384042503	6	80	standard ATAC-Seq in frozen liver
peak_62471	chr5	93718526	93718880	354	15.0763322327105	4.80276463672808	1.11216622641095	4.31838741608527	1.57173361738768e-05	0.000800678431083541	3	143.5	standard ATAC-Seq in frozen liver
peak_80529	chr8_random	396550	396933	383	15.0763322327105	4.80276463672808	1.11216622641095	4.31838741608527	1.57173361738768e-05	0.000800678431083541	4	153.5	standard ATAC-Seq in frozen liver
peak_15196	chr11	106492526	106492910	384	9.62476687825728	6.64876234220572	1.54153862888701	4.31306891544204	1.61003904177e-05	0.000813043187509626	1	103	standard ATAC-Seq in frozen liver
peak_23925	chr13_random	132006	132848	842	9.62476687825728	6.64876234220572	1.54153862888701	4.31306891544204	1.61003904177e-05	0.000813043187509626	0	228	standard ATAC-Seq in frozen liver
peak_34627	chr17	15114720	15115086	366	9.62476687825728	6.64876234220572	1.54153862888701	4.31306891544204	1.61003904177e-05	0.000813043187509626	0	99	standard ATAC-Seq in frozen liver
peak_68872	chr6	114498003	114498232	229	9.62476687825728	6.64876234220572	1.54153862888701	4.31306891544204	1.61003904177e-05	0.000813043187509626	0	60.5	standard ATAC-Seq in frozen liver
peak_85793	chrX	32018248	32018607	359	9.62476687825728	6.64876234220572	1.54153862888701	4.31306891544204	1.61003904177e-05	0.000813043187509626	0	94.5	standard ATAC-Seq in frozen liver
peak_86855	chrX	113400653	113401007	354	9.62476687825728	6.64876234220572	1.54153862888701	4.31306891544204	1.61003904177e-05	0.000813043187509626	0	96	standard ATAC-Seq in frozen liver
peak_35020	chr17	26429601	26429932	331	9.62336959877907	6.64861439255561	1.54152527531289	4.31301030157037	1.61046611272443e-05	0.000813043187509626	0	88	standard ATAC-Seq in frozen liver
peak_43236	chr1_random	1062040	1062325	285	9.62336959877907	6.64861439255561	1.54152527531289	4.31301030157037	1.61046611272443e-05	0.000813043187509626	0	76	standard ATAC-Seq in frozen liver
peak_23917	chr13_random	66472	67592	1120	9.62616415773549	6.64891063932303	1.54195979926294	4.31198701970131	1.61793934429397e-05	0.000813043187509626	0	297.5	standard ATAC-Seq in frozen liver
peak_43232	chr1_random	1032844	1033242	398	9.62616415773549	6.64891063932303	1.54195979926294	4.31198701970131	1.61793934429397e-05	0.000813043187509626	2	105.5	standard ATAC-Seq in frozen liver
peak_59394	chr4	146032651	146032851	200	9.62616415773549	6.64891063932303	1.54195979926294	4.31198701970131	1.61793934429397e-05	0.000813043187509626	0	53	standard ATAC-Seq in frozen liver
peak_59416	chr4	146606506	146606736	230	9.62616415773549	6.64891063932303	1.54195979926294	4.31198701970131	1.61793934429397e-05	0.000813043187509626	0	60.5	standard ATAC-Seq in frozen liver
peak_60245	chr5	15051493	15052368	875	9.62616415773549	6.64891063932303	1.54195979926294	4.31198701970131	1.61793934429397e-05	0.000813043187509626	1	232	standard ATAC-Seq in frozen liver
peak_85314	chrUn_random	5881302	5881861	559	9.62616415773549	6.64891063932303	1.54195979926294	4.31198701970131	1.61793934429397e-05	0.000813043187509626	2	149	standard ATAC-Seq in frozen liver
peak_86512	chrX	92156859	92157075	216	9.62616415773549	6.64891063932303	1.54195979926294	4.31198701970131	1.61793934429397e-05	0.000813043187509626	0	58	standard ATAC-Seq in frozen liver
peak_9942	chr10	114174301	114174641	340	9.62197231930087	6.64846612276423	1.54191976310226	4.31181069330605	1.61923042519827e-05	0.000813043187509626	0	89.5	standard ATAC-Seq in frozen liver
peak_85143	chrUn_random	2440962	2441543	581	9.62197231930087	6.64846612276423	1.54191976310226	4.31181069330605	1.61923042519827e-05	0.000813043187509626	0	151.5	standard ATAC-Seq in frozen liver
peak_19814	chr12	116862622	116863119	497	9.62057503982266	6.64831686847592	1.54272626099952	4.3094598416757	1.63653771198866e-05	0.000818914488367842	1	129	standard ATAC-Seq in frozen liver
peak_56013	chr4	61268410	61268823	413	9.62057503982266	6.64831686847592	1.54272626099952	4.3094598416757	1.63653771198866e-05	0.000818914488367842	0	107.5	standard ATAC-Seq in frozen liver
peak_64395	chr5	136101505	136101977	472	9.62057503982266	6.64831686847592	1.54272626099952	4.3094598416757	1.63653771198866e-05	0.000818914488367842	0	125.5	standard ATAC-Seq in frozen liver
peak_77690	chr8	72063510	72063769	259	9.62057503982266	6.64831686847592	1.54272626099952	4.3094598416757	1.63653771198866e-05	0.000818914488367842	0	69.5	standard ATAC-Seq in frozen liver
peak_80520	chr8_random	159976	160176	200	9.62057503982266	6.64831686847592	1.54272626099952	4.3094598416757	1.63653771198866e-05	0.000818914488367842	0	53	standard ATAC-Seq in frozen liver
peak_85319	chrUn_random	5896624	5897106	482	9.62057503982266	6.64831686847592	1.54272626099952	4.3094598416757	1.63653771198866e-05	0.000818914488367842	0	130	standard ATAC-Seq in frozen liver
peak_54375	chr4	3007955	3008208	253	22.0890060741736	6.38766385004157	1.48484653836183	4.30190170163228	1.69338437603971e-05	0.000841667308188059	2	151.5	standard ATAC-Seq in frozen liver
peak_43225	chr1_random	872325	872575	250	9.63035599617011	6.6493641277873	1.54573303455922	4.30175455859584	1.69450953167582e-05	0.000841667308188059	0	66.5	standard ATAC-Seq in frozen liver
peak_65640	chr6	14780235	14780491	256	9.63035599617011	6.6493641277873	1.54573303455922	4.30175455859584	1.69450953167582e-05	0.000841667308188059	0	68	standard ATAC-Seq in frozen liver
peak_2054	chr1	87760985	87761306	321	9.61778048086624	6.64801284435442	1.54561365063529	4.30121255827542	1.69866018287942e-05	0.000842294847282857	0	83	standard ATAC-Seq in frozen liver
peak_76353	chr8	19713388	19713606	218	22.1040452021101	6.38808462081244	1.48776502851931	4.29374565093128	1.75683730977279e-05	0.000867701154142242	1	132.5	standard ATAC-Seq in frozen liver
peak_26299	chr14	69779924	69780608	684	21.8546403959177	6.37179722341156	1.48550392920978	4.28931697730417	1.79223434153574e-05	0.000882757914680638	3	411.5	standard ATAC-Seq in frozen liver
peak_8856	chr10	82417897	82418238	341	9.389334866847	6.61306448180151	1.54355076209162	4.28431940446217	1.83299427017672e-05	0.000895349468315592	0	89	standard ATAC-Seq in frozen liver
peak_30991	chr16	3231639	3231922	283	9.389334866847	6.61306448180151	1.54355076209162	4.28431940446217	1.83299427017672e-05	0.000895349468315592	0	73	standard ATAC-Seq in frozen liver
peak_80274	chr8	127536451	127537158	707	9.389334866847	6.61306448180151	1.54355076209162	4.28431940446217	1.83299427017672e-05	0.000895349468315592	0	185	standard ATAC-Seq in frozen liver
peak_8102	chr10	69685001	69685309	308	14.8412311676241	4.77997261237244	1.11577073308331	4.28400967209771	1.83554927622618e-05	0.000895349468315592	3	122.5	standard ATAC-Seq in frozen liver
peak_19816	chr12	116876104	116876816	712	9.39073214632521	6.61321604988978	1.54377727488458	4.28378896196942	1.83737200078709e-05	0.000895349468315592	3	184.5	standard ATAC-Seq in frozen liver
peak_23930	chr13_random	260301	261388	1087	9.39073214632521	6.61321604988978	1.54377727488458	4.28378896196942	1.83737200078709e-05	0.000895349468315592	0	283.5	standard ATAC-Seq in frozen liver
peak_85212	chrUn_random	4074336	4074727	391	9.39073214632521	6.61321604988978	1.54377727488458	4.28378896196942	1.83737200078709e-05	0.000895349468315592	1	103	standard ATAC-Seq in frozen liver
peak_85281	chrUn_random	5331605	5332037	432	9.39073214632521	6.61321604988978	1.54377727488458	4.28378896196942	1.83737200078709e-05	0.000895349468315592	1	112	standard ATAC-Seq in frozen liver
peak_60249	chr5	15112702	15112940	238	9.38793758736879	6.61291292706515	1.54375102576042	4.28366544651055	1.8383927999213e-05	0.000895349468315592	0	62	standard ATAC-Seq in frozen liver
peak_68866	chr6	114475467	114475698	231	9.38793758736879	6.61291292706515	1.54375102576042	4.28366544651055	1.8383927999213e-05	0.000895349468315592	0	60	standard ATAC-Seq in frozen liver
peak_85139	chrUn_random	2433611	2433876	265	9.38793758736879	6.61291292706515	1.54375102576042	4.28366544651055	1.8383927999213e-05	0.000895349468315592	0	67.5	standard ATAC-Seq in frozen liver
peak_85245	chrUn_random	4764490	4764929	439	9.38793758736879	6.61291292706515	1.54375102576042	4.28366544651055	1.8383927999213e-05	0.000895349468315592	0	115.5	standard ATAC-Seq in frozen liver
peak_37766	chr18	3118947	3119255	308	9.39212942580341	6.61336833413079	1.54443280079261	4.2820693336329	1.85163264215649e-05	0.000897807623565164	0	81	standard ATAC-Seq in frozen liver
peak_37790	chr18	4196363	4197786	1423	9.39212942580341	6.61336833413079	1.54443280079261	4.2820693336329	1.85163264215649e-05	0.000897807623565164	1	372	standard ATAC-Seq in frozen liver
peak_60279	chr5	15221353	15221637	284	9.39212942580341	6.61336833413079	1.54443280079261	4.2820693336329	1.85163264215649e-05	0.000897807623565164	0	72.5	standard ATAC-Seq in frozen liver
peak_86510	chrX	92124351	92124558	207	9.39212942580341	6.61336833413079	1.54443280079261	4.2820693336329	1.85163264215649e-05	0.000897807623565164	0	53.5	standard ATAC-Seq in frozen liver
peak_68879	chr6	114515291	114515786	495	9.38654030789059	6.61276068211813	1.54438036190439	4.28182126970579	1.85369848350901e-05	0.000897807623565164	0	127.5	standard ATAC-Seq in frozen liver
peak_85243	chrUn_random	4754456	4754739	283	9.38654030789059	6.61276068211813	1.54438036190439	4.28182126970579	1.85369848350901e-05	0.000897807623565164	0	72.5	standard ATAC-Seq in frozen liver
peak_77692	chr8	72071427	72071659	232	14.8475556723674	4.77904101094254	1.1162253289049	4.28143035925476	1.85695838717414e-05	0.00089814291575234	2	93	standard ATAC-Seq in frozen liver
peak_43237	chr1_random	1078101	1078325	224	9.63454783460473	6.64984279673158	1.55357970434966	4.28033578072214	1.86611544047831e-05	0.000899837780910312	0	60	standard ATAC-Seq in frozen liver
peak_59427	chr4	146777764	146777972	208	9.63454783460473	6.64984279673158	1.55357970434966	4.28033578072214	1.86611544047831e-05	0.000899837780910312	0	56	standard ATAC-Seq in frozen liver
peak_17488	chr12	56330762	56331858	1096	14.1852060738684	3.65561242468068	0.854282712687606	4.27916001387876	1.87599961203444e-05	0.000903260623124376	24	399.5	standard ATAC-Seq in frozen liver
peak_22725	chr13	85266193	85267127	934	21.6139502129185	6.35603533151509	1.4867864161737	4.27501574023832	1.91123791592213e-05	0.000917048416467042	7	551	standard ATAC-Seq in frozen liver
peak_76362	chr8	19766096	19766317	221	16.6863299410874	7.44252911311876	1.74754817288133	4.2588406022866	2.05489930134788e-05	0.000975285965046989	0	103.5	standard ATAC-Seq in frozen liver
peak_34373	chr17	8323683	8324147	464	9.15530013491493	6.57661623381809	1.54582830069686	4.25442866510683	2.09583459666045e-05	0.000991488367919598	0	117.5	standard ATAC-Seq in frozen liver
peak_56028	chr4	61438751	61439103	352	9.15530013491493	6.57661623381809	1.54582830069686	4.25442866510683	2.09583459666045e-05	0.000991488367919598	0.5	89	standard ATAC-Seq in frozen liver
peak_60233	chr5	14995155	14996301	1146	9.15530013491493	6.57661623381809	1.54582830069686	4.25442866510683	2.09583459666045e-05	0.000991488367919598	2	290	standard ATAC-Seq in frozen liver
peak_18375	chr12	82379578	82379887	309	9.15669741439314	6.57677181863022	1.54628955640548	4.25326019398246	2.10680537290492e-05	0.000994659838561255	0	79	standard ATAC-Seq in frozen liver
peak_55972	chr4	60755671	60756083	412	9.15250557595852	6.57630547422601	1.54625117036791	4.25306418533624	2.10865104469769e-05	0.000994659838561255	0	103	standard ATAC-Seq in frozen liver
peak_76346	chr8	19686649	19687047	398	9.15250557595852	6.57630547422601	1.54625117036791	4.25306418533624	2.10865104469769e-05	0.000994659838561255	0	102	standard ATAC-Seq in frozen liver
peak_85296	chrUn_random	5547280	5548129	849	9.15250557595852	6.57630547422601	1.54625117036791	4.25306418533624	2.10865104469769e-05	0.000994659838561255	0	209.5	standard ATAC-Seq in frozen liver
peak_24011	chr14	8838461	8838833	372	14.5984818124989	4.7548486709907	1.11800158730421	4.25298919517268	2.10935757991943e-05	0.000994659838561255	6	142.5	standard ATAC-Seq in frozen liver
peak_46715	chr2	105098062	105098697	635	9.15809469387134	6.57692852612412	1.54720423262693	4.25084703585475	2.12963580987637e-05	0.0010026013794759	0	162	standard ATAC-Seq in frozen liver
peak_19812	chr12	116855501	116855743	242	13.934419548568	4.0717932116309	0.958414478260172	4.24846796870442	2.15237414220999e-05	0.00101113060951195	4	89	standard ATAC-Seq in frozen liver
peak_19815	chr12	116875307	116875596	289	9.15949197334955	6.57708708270514	1.54858248490663	4.24716613212999	2.16491430461434e-05	0.00101484271572331	0	74	standard ATAC-Seq in frozen liver
peak_35931	chr17	38138851	38139101	250	9.15949197334955	6.57708708270514	1.54858248490663	4.24716613212999	2.16491430461434e-05	0.00101484271572331	0	63	standard ATAC-Seq in frozen liver
peak_43235	chr1_random	1056649	1056909	260	9.15949197334955	6.57708708270514	1.54858248490663	4.24716613212999	2.16491430461434e-05	0.00101484271572331	0	67	standard ATAC-Seq in frozen liver
peak_60215	chr5	14941189	14941404	215	9.15949197334955	6.57708708270514	1.54858248490663	4.24716613212999	2.16491430461434e-05	0.00101484271572331	0	54.5	standard ATAC-Seq in frozen liver
peak_85203	chrUn_random	3926587	3926850	263	9.16088925282776	6.57724813437996	1.55044007271984	4.24218146196512	2.21357594967586e-05	0.0010332264188783	0	67.5	standard ATAC-Seq in frozen liver
peak_80527	chr8_random	386675	386888	213	21.1665089949036	6.32475292048411	1.49120085478579	4.24138230620359	2.22147370341177e-05	0.00103602834975069	1.5	124	standard ATAC-Seq in frozen liver
peak_4773	chr1	172993994	172994997	1003	13.6986565908339	4.0449908925612	0.956044855766082	4.23096350361086	2.32692428566949e-05	0.00107808410035738	18	360	standard ATAC-Seq in frozen liver
peak_60250	chr5	15114968	15115195	227	9.16368381178417	6.57758017140788	1.55564019951665	4.2282143219567	2.3555335768807e-05	0.00108960857883204	0	59	standard ATAC-Seq in frozen liver
peak_34598	chr17	14211462	14212409	947	14.4488990607964	3.33423425381326	0.788698098105511	4.22751653873927	2.36284812022268e-05	0.00109126176587741	24.5	346.5	standard ATAC-Seq in frozen liver
peak_52500	chr3	100120241	100120584	343	8.91986812350465	6.53906395344316	1.54815080912391	4.22379003060017	2.40227873991072e-05	0.00110471920416686	0	84.5	standard ATAC-Seq in frozen liver
peak_85283	chrUn_random	5335287	5335707	420	8.91986812350465	6.53906395344316	1.54815080912391	4.22379003060017	2.40227873991072e-05	0.00110471920416686	0	104.5	standard ATAC-Seq in frozen liver
peak_86875	chrX	123302261	123303690	1429	8.91986812350465	6.53906395344316	1.54815080912391	4.22379003060017	2.40227873991072e-05	0.00110471920416686	1	352	standard ATAC-Seq in frozen liver
peak_55973	chr4	60818230	60818789	559	8.92126540298286	6.53922321200005	1.54839854252089	4.22321710620689	2.40839616717555e-05	0.00110471920416686	0	137.5	standard ATAC-Seq in frozen liver
peak_59444	chr4	146973069	146973269	200	8.92126540298286	6.53922321200005	1.54839854252089	4.22321710620689	2.40839616717555e-05	0.00110471920416686	0	49.5	standard ATAC-Seq in frozen liver
peak_60216	chr5	14942170	14942458	288	8.92126540298286	6.53922321200005	1.54839854252089	4.22321710620689	2.40839616717555e-05	0.00110471920416686	0	71	standard ATAC-Seq in frozen liver
peak_76369	chr8	19800425	19801333	908	8.92126540298286	6.53922321200005	1.54839854252089	4.22321710620689	2.40839616717555e-05	0.00110471920416686	0	226.5	standard ATAC-Seq in frozen liver
peak_85255	chrUn_random	5095472	5095738	266	8.92126540298286	6.53922321200005	1.54839854252089	4.22321710620689	2.40839616717555e-05	0.00110471920416686	0	65	standard ATAC-Seq in frozen liver
peak_68861	chr6	114454692	114454892	200	8.91847084402644	6.53890470694989	1.54837381018212	4.22307886115741	2.409874503325e-05	0.00110481826430854	0	49.5	standard ATAC-Seq in frozen liver
peak_16724	chr12	20280813	20281024	211	8.92266268246107	6.53938326692617	1.54911971728053	4.22135435627017	2.4283883632991e-05	0.00110981786510482	0	53	standard ATAC-Seq in frozen liver
peak_19808	chr12	116812569	116812982	413	8.92266268246107	6.53938326692617	1.54911971728053	4.22135435627017	2.4283883632991e-05	0.00110981786510482	1	102	standard ATAC-Seq in frozen liver
peak_57932	chr4	123434699	123434899	200	8.92266268246107	6.53938326692617	1.54911971728053	4.22135435627017	2.4283883632991e-05	0.00110981786510482	0	49	standard ATAC-Seq in frozen liver
peak_85318	chrUn_random	5893717	5894428	711	8.92266268246107	6.53938326692617	1.54911971728053	4.22135435627017	2.4283883632991e-05	0.00110981786510482	1	175	standard ATAC-Seq in frozen liver
peak_55970	chr4	60745731	60746200	469	8.91707356454824	6.53874468747947	1.54907034023032	4.22107667913084	2.43138205627235e-05	0.00111060608654958	0	117.5	standard ATAC-Seq in frozen liver
peak_54377	chr4	3011405	3011609	204	20.6942476926048	6.29183117927874	1.49102743876724	4.21979570307622	2.44523803435754e-05	0.00111577052934795	1	116	standard ATAC-Seq in frozen liver
peak_37789	chr18	4195835	4196174	339	8.91567628507003	6.53858311764875	1.55024879936344	4.21776370369298	2.46737184063758e-05	0.00112284265495424	0	83	standard ATAC-Seq in frozen liver
peak_43224	chr1_random	868243	868499	256	8.91567628507003	6.53858311764875	1.55024879936344	4.21776370369298	2.46737184063758e-05	0.00112284265495424	0	63.5	standard ATAC-Seq in frozen liver
peak_59432	chr4	146805663	146806017	354	8.92545724141748	6.53970881561127	1.55202155031421	4.21367139798239	2.51252756856581e-05	0.00113699017721464	1	88.5	standard ATAC-Seq in frozen liver
peak_72034	chr7	48566457	48566735	278	8.92545724141748	6.53970881561127	1.55202155031421	4.21367139798239	2.51252756856581e-05	0.00113699017721464	0	68.5	standard ATAC-Seq in frozen liver
peak_30995	chr16	3246504	3246737	233	8.91427900559182	6.53841925899163	1.55192353077825	4.2131065927667	2.51882118945768e-05	0.00113924915596975	0	57	standard ATAC-Seq in frozen liver
peak_25727	chr14	57312694	57313052	358	20.4395847148235	6.27445733160726	1.49019467586037	4.21049506701845	2.54811687875297e-05	0.00115012192424745	2	198	standard ATAC-Seq in frozen liver
peak_31150	chr16	5709127	5709475	348	14.1415905844605	4.70687319155898	1.12004530555621	4.20239535687494	2.64105346218167e-05	0.00118473786753807	2	130.5	standard ATAC-Seq in frozen liver
peak_19811	chr12	116831410	116831708	298	8.68583339157258	6.50067151558025	1.55080174320998	4.19181339203592	2.76733580196084e-05	0.00122856442118616	0	72	standard ATAC-Seq in frozen liver
peak_68876	chr6	114507870	114508172	302	8.68583339157258	6.50067151558025	1.55080174320998	4.19181339203592	2.76733580196084e-05	0.00122856442118616	0	73	standard ATAC-Seq in frozen liver
peak_23768	chr13	114508666	114509014	348	8.68443611209437	6.50050815294254	1.55078994506685	4.19173994106747	2.76823208512334e-05	0.00122856442118616	0	83.5	standard ATAC-Seq in frozen liver
peak_55955	chr4	60524270	60524886	616	8.68443611209437	6.50050815294254	1.55078994506685	4.19173994106747	2.76823208512334e-05	0.00122856442118616	0	146.5	standard ATAC-Seq in frozen liver
peak_80573	chr8_random	843471	843751	280	20.2237146161081	6.25856852975977	1.49330314186841	4.1910904452589	2.77616955720224e-05	0.00123083882207083	2	155	standard ATAC-Seq in frozen liver
peak_59382	chr4	145586793	145587045	252	8.68723067105079	6.50083530477832	1.55130997817141	4.19054566543889	2.7828439802428e-05	0.00123188005248257	0	60	standard ATAC-Seq in frozen liver
peak_20358	chr13	21857452	21858024	572	8.68303883261617	6.50034438580936	1.55127463729584	4.19032467206494	2.78555584943042e-05	0.00123188005248257	0	134.5	standard ATAC-Seq in frozen liver
peak_85207	chrUn_random	4054461	4054705	244	8.68303883261617	6.50034438580936	1.55127463729584	4.19032467206494	2.78555584943042e-05	0.00123188005248257	0	57.5	standard ATAC-Seq in frozen liver
peak_34952	chr17	25588713	25588918	205	8.68862795052899	6.50100034589997	1.55232070554243	4.18792348944951	2.81518382923049e-05	0.00124121951410792	0	50.5	standard ATAC-Seq in frozen liver
peak_87514	chrY_random	21301702	21302075	373	8.68862795052899	6.50100034589997	1.55232070554243	4.18792348944951	2.81518382923049e-05	0.00124121951410792	0	90	standard ATAC-Seq in frozen liver
peak_23730	chr13	113842750	113842994	244	8.68164155313796	6.50017938666168	1.55226198641268	4.18755303135638	2.8197814704263e-05	0.00124199524162174	0	59	standard ATAC-Seq in frozen liver
peak_34641	chr17	15190400	15190809	409	8.68164155313796	6.50017938666168	1.55226198641268	4.18755303135638	2.8197814704263e-05	0.00124199524162174	0	96	standard ATAC-Seq in frozen liver
peak_68629	chr6	103264487	103264822	335	19.9767734225483	6.24052931915191	1.4905085427192	4.18684572432376	2.82857947295187e-05	0.00124524369664625	1	181	standard ATAC-Seq in frozen liver
peak_2007	chr1	85102246	85102459	213	8.6900252300072	6.50116745391155	1.55384633646574	4.18391915683156	2.86526040846553e-05	0.00125808832523363	0	51.5	standard ATAC-Seq in frozen liver
peak_37765	chr18	3117875	3118239	364	8.6900252300072	6.50116745391155	1.55384633646574	4.18391915683156	2.86526040846553e-05	0.00125808832523363	1	89	standard ATAC-Seq in frozen liver
peak_85211	chrUn_random	4070962	4071162	200	8.6900252300072	6.50116745391155	1.55384633646574	4.18391915683156	2.86526040846553e-05	0.00125808832523363	0	49	standard ATAC-Seq in frozen liver
peak_1177	chr1	58670752	58670957	205	14.2145333825405	3.30761664937482	0.790571416996663	4.18383030079721	2.86638115211081e-05	0.00125808832523363	5	73	standard ATAC-Seq in frozen liver
peak_50944	chr3	56379321	56379718	397	8.68024427365975	6.50001234295083	1.55376452313249	4.18339603342622	2.87186457655075e-05	0.0012598632374694	1	95.5	standard ATAC-Seq in frozen liver
peak_76767	chr8	34826956	34827690	734	14.2106724904297	3.30797341741771	0.791024502034862	4.18188489599014	2.89102329128121e-05	0.00126699783389905	22	260	standard ATAC-Seq in frozen liver
peak_68887	chr6	114551940	114552217	277	8.69142250948541	6.50133728672096	1.55588369877162	4.17854965114282	2.93373955004478e-05	0.00128443197438904	0	67	standard ATAC-Seq in frozen liver
peak_85320	chrUn_random	5898577	5898817	240	8.67744971470334	6.49966911056451	1.55840778364562	4.17071140094007	3.03650218067216e-05	0.00132214743457834	0	57.5	standard ATAC-Seq in frozen liver
peak_18646	chr12	87039091	87039533	442	13.2211371169461	3.99163883867701	0.957786085781817	4.16756820539811	3.07866410209188e-05	0.00133917297987564	6	150	standard ATAC-Seq in frozen liver
peak_77891	chr8	73956863	73957203	340	13.2239316759025	3.99186724658505	0.958198401638777	4.1660132596317	3.09972680674516e-05	0.00134766512866135	5	117.5	standard ATAC-Seq in frozen liver
peak_85345	chrX	4261120	4261411	291	13.2277925680133	3.99144525166679	0.958845843306272	4.16276013452128	3.14423615070492e-05	0.0013636293541801	4	100	standard ATAC-Seq in frozen liver
peak_85248	chrUn_random	4771204	4771434	230	8.67605243522513	6.49949172372355	1.56154244360341	4.16222546517873	3.15160936967831e-05	0.00136547376447958	0	54	standard ATAC-Seq in frozen liver
peak_326	chr1	21622822	21623068	246	8.4504013801623	6.46106149638249	1.55354935939664	4.15890326065456	3.19779285529145e-05	0.00137928752040808	0.5	57.5	standard ATAC-Seq in frozen liver
peak_2028	chr1	87420754	87420977	223	8.4504013801623	6.46106149638249	1.55354935939664	4.15890326065456	3.19779285529145e-05	0.00137928752040808	1	53	standard ATAC-Seq in frozen liver
peak_16450	chr12	8590968	8591301	333	8.4504013801623	6.46106149638249	1.55354935939664	4.15890326065456	3.19779285529145e-05	0.00137928752040808	0	76	standard ATAC-Seq in frozen liver
peak_37749	chr17_random	28125	29210	1085	8.4504013801623	6.46106149638249	1.55354935939664	4.15890326065456	3.19779285529145e-05	0.00137928752040808	0	257.5	standard ATAC-Seq in frozen liver
peak_72033	chr7	48485890	48486185	295	8.4504013801623	6.46106149638249	1.55354935939664	4.15890326065456	3.19779285529145e-05	0.00137928752040808	0	69.5	standard ATAC-Seq in frozen liver
peak_7405	chr10	52248427	52249291	864	8.45179865964051	6.46122946862531	1.55382194005599	4.15828178381397	3.20650337850138e-05	0.00137928752040808	0	204.5	standard ATAC-Seq in frozen liver
peak_25224	chr14	44530241	44530471	230	8.45179865964051	6.46122946862531	1.55382194005599	4.15828178381397	3.20650337850138e-05	0.00137928752040808	0	53.5	standard ATAC-Seq in frozen liver
peak_45202	chr2	57067179	57067486	307	8.45179865964051	6.46122946862531	1.55382194005599	4.15828178381397	3.20650337850138e-05	0.00137928752040808	0	72	standard ATAC-Seq in frozen liver
peak_71196	chr7	23559203	23559403	200	8.45179865964051	6.46122946862531	1.55382194005599	4.15828178381397	3.20650337850138e-05	0.00137928752040808	0	47	standard ATAC-Seq in frozen liver
peak_24127	chr14	13370068	13370412	344	8.44900410068409	6.46089353394804	1.55379984076034	4.1581247239583	3.20870827083359e-05	0.00137928752040808	0	80.5	standard ATAC-Seq in frozen liver
peak_54870	chr4	25399284	25399633	349	8.44900410068409	6.46089353394804	1.55379984076034	4.1581247239583	3.20870827083359e-05	0.00137928752040808	0	83	standard ATAC-Seq in frozen liver
peak_85247	chrUn_random	4770217	4770999	782	8.44900410068409	6.46089353394804	1.55379984076034	4.1581247239583	3.20870827083359e-05	0.00137928752040808	1	182	standard ATAC-Seq in frozen liver
peak_37753	chr17_random	300480	301669	1189	8.45319593911871	6.46139832865547	1.55462088570866	4.15625339145633	3.23509013477973e-05	0.00138518519327684	0	279	standard ATAC-Seq in frozen liver
peak_69424	chr6	123531718	123532093	375	8.45319593911871	6.46139832865547	1.55462088570866	4.15625339145633	3.23509013477973e-05	0.00138518519327684	0	89	standard ATAC-Seq in frozen liver
peak_72032	chr7	48485540	48485767	227	8.45319593911871	6.46139832865547	1.55462088570866	4.15625339145633	3.23509013477973e-05	0.00138518519327684	0	53	standard ATAC-Seq in frozen liver
peak_87496	chrX	166580880	166581085	205	8.45319593911871	6.46139832865547	1.55462088570866	4.15625339145633	3.23509013477973e-05	0.00138518519327684	0	48.5	standard ATAC-Seq in frozen liver
peak_32576	chr16	36768886	36769455	569	8.44760682120589	6.46072470268041	1.55457682139855	4.15593788209715	3.23955840686586e-05	0.00138573293321761	0	133.5	standard ATAC-Seq in frozen liver
peak_59369	chr4	145184275	145184525	250	8.44760682120589	6.46072470268041	1.55457682139855	4.15593788209715	3.23955840686586e-05	0.00138573293321761	0.5	57.5	standard ATAC-Seq in frozen liver
peak_59357	chr4	145019748	145019958	210	8.45459321859692	6.46156894442738	1.55595637814382	4.15279569221325	3.2843795096134e-05	0.00140028379573862	0	50	standard ATAC-Seq in frozen liver
peak_59358	chr4	145029702	145030159	457	8.45459321859692	6.46156894442738	1.55595637814382	4.15279569221325	3.2843795096134e-05	0.00140028379573862	1	107.5	standard ATAC-Seq in frozen liver
peak_72021	chr7	48332245	48332558	313	8.44620954172768	6.46055413180596	1.55589062467092	4.15231895440747	3.29123109104685e-05	0.00140236248226548	0	72	standard ATAC-Seq in frozen liver
peak_19838	chr12	117089218	117089481	263	8.45599049807513	6.46174212535259	1.55784595236265	4.14786976565471	3.35583194769601e-05	0.00142641600888978	0	61.5	standard ATAC-Seq in frozen liver
peak_55980	chr4	60896823	60897185	362	8.44481226224947	6.46038099722288	1.55775893449942	4.14722769624102	3.36525345693973e-05	0.0014282665233047	0	85	standard ATAC-Seq in frozen liver
peak_72568	chr7	71622792	71623012	220	8.44481226224947	6.46038099722288	1.55775893449942	4.14722769624102	3.36525345693973e-05	0.0014282665233047	0	50	standard ATAC-Seq in frozen liver
peak_34838	chr17	24479650	24480037	387	19.2816556241431	6.18854128446406	1.4935122612621	4.14361598828416	3.41872034579664e-05	0.00144472711706314	3	205.5	standard ATAC-Seq in frozen liver
peak_86288	chrX	71093470	71093787	317	8.44341498277127	6.46020452109058	1.56019743104976	4.1406327125817	3.46349154073465e-05	0.00145871663211528	0	72.5	standard ATAC-Seq in frozen liver
peak_85169	chrUn_random	3549363	3549886	523	13.6749184000745	4.65648699650111	1.12628196501979	4.13438831582399	3.55901274105715e-05	0.00149248316283939	8	192.5	standard ATAC-Seq in frozen liver
peak_2015	chr1	85243844	85244321	477	8.45878505703154	6.46209918995603	1.56336195876984	4.13346324164165	3.57337468844539e-05	0.00149778821531634	0	113	standard ATAC-Seq in frozen liver
peak_388	chr1	24740824	24741182	358	12.9857051055358	3.96410328870218	0.959890197547783	4.12974660938222	3.63163270364502e-05	0.00151857077205116	6	121	standard ATAC-Seq in frozen liver
peak_71949	chr7	39207126	39207687	561	12.9843078260576	3.96398852328277	0.960455206929069	4.12719770238646	3.67210678986097e-05	0.00153248906040611	8	189.5	standard ATAC-Seq in frozen liver
peak_2914	chr1	125200236	125200556	320	8.21636664823023	6.42050587862614	1.55671200943481	4.1244018416465	3.71699465381442e-05	0.00154376928932692	0	72	standard ATAC-Seq in frozen liver
peak_17425	chr12	54030042	54030461	419	8.21636664823023	6.42050587862614	1.55671200943481	4.1244018416465	3.71699465381442e-05	0.00154376928932692	0	95	standard ATAC-Seq in frozen liver
peak_23969	chr14	7469512	7470040	528	8.21496936875202	6.42033320330265	1.55670189486187	4.12431771586707	3.71835334258977e-05	0.00154376928932692	0	122	standard ATAC-Seq in frozen liver
peak_46309	chr2	92008132	92008471	339	8.21496936875202	6.42033320330265	1.55670189486187	4.12431771586707	3.71835334258977e-05	0.00154376928932692	0	76	standard ATAC-Seq in frozen liver
peak_22268	chr13	65762102	65762575	473	8.21776392770844	6.42067902775521	1.55727618634353	4.12301882226229	3.73939129511309e-05	0.00154614328544001	0	108.5	standard ATAC-Seq in frozen liver
peak_34284	chr17	5840858	5842044	1186	8.21776392770844	6.42067902775521	1.55727618634353	4.12301882226229	3.73939129511309e-05	0.00154614328544001	0	275	standard ATAC-Seq in frozen liver
peak_49587	chr2	175799958	175800339	381	8.21776392770844	6.42067902775521	1.55727618634353	4.12301882226229	3.73939129511309e-05	0.00154614328544001	0	87	standard ATAC-Seq in frozen liver
peak_59385	chr4	145699649	145699899	250	8.21776392770844	6.42067902775521	1.55727618634353	4.12301882226229	3.73939129511309e-05	0.00154614328544001	0	58	standard ATAC-Seq in frozen liver
peak_59433	chr4	146806025	146806755	730	8.21776392770844	6.42067902775521	1.55727618634353	4.12301882226229	3.73939129511309e-05	0.00154614328544001	3	169.5	standard ATAC-Seq in frozen liver
peak_60278	chr5	15219831	15220537	706	8.21776392770844	6.42067902775521	1.55727618634353	4.12301882226229	3.73939129511309e-05	0.00154614328544001	1	160	standard ATAC-Seq in frozen liver
peak_87164	chrX	145316759	145317215	456	8.21776392770844	6.42067902775521	1.55727618634353	4.12301882226229	3.73939129511309e-05	0.00154614328544001	1	103	standard ATAC-Seq in frozen liver
peak_23449	chr13	108648617	108650033	1416	8.21357208927382	6.42016007049105	1.55724592587499	4.12276568768909	3.74350440686866e-05	0.00154614328544001	0	320	standard ATAC-Seq in frozen liver
peak_61274	chr5	46826879	46827212	333	8.21357208927382	6.42016007049105	1.55724592587499	4.12276568768909	3.74350440686866e-05	0.00154614328544001	0	74.5	standard ATAC-Seq in frozen liver
peak_87517	chrY_random	32493390	32493742	352	8.21357208927382	6.42016007049105	1.55724592587499	4.12276568768909	3.74350440686866e-05	0.00154614328544001	0	81	standard ATAC-Seq in frozen liver
peak_50130	chr3	21597226	21597592	366	18.8041361502554	6.15237455486008	1.49391839630726	4.11828020196272	3.81710400958941e-05	0.0015685119460218	1	187.5	standard ATAC-Seq in frozen liver
peak_85298	chrUn_random	5552404	5552640	236	18.8052024834097	6.15209235736676	1.49385585921921	4.11826369953943	3.81737730667218e-05	0.0015685119460218	1	121	standard ATAC-Seq in frozen liver
peak_2005	chr1	85071576	85071900	324	8.22055848666485	6.42103044258451	1.56010439453651	4.11576972994306	3.85889420726973e-05	0.00158040407552411	0	74	standard ATAC-Seq in frozen liver
peak_85159	chrUn_random	2970665	2970946	281	8.22055848666485	6.42103044258451	1.56010439453651	4.11576972994306	3.85889420726973e-05	0.00158040407552411	0	64.5	standard ATAC-Seq in frozen liver
peak_85361	chrX	4754260	4754549	289	8.22055848666485	6.42103044258451	1.56010439453651	4.11576972994306	3.85889420726973e-05	0.00158040407552411	0	66.5	standard ATAC-Seq in frozen liver
peak_43164	chr19	61000458	61000813	355	18.7971497528644	6.15198864818163	1.49499366270926	4.1150600177347	3.87078683777991e-05	0.00158154712070803	2	182	standard ATAC-Seq in frozen liver
peak_20188	chr13	13531684	13531891	207	8.22195576614306	6.4212103689741	1.562392265549	4.10985801105319	3.95902476927448e-05	0.00161233079935846	0	47.5	standard ATAC-Seq in frozen liver
peak_4775	chr1	173000782	173001169	387	8.22335304562126	6.42139440242704	1.5653683499331	4.1021618986365	4.09307702569824e-05	0.00165617505756523	0	90.5	standard ATAC-Seq in frozen liver
peak_400	chr1	26742825	26743524	699	13.1970679798629	4.60335758813042	1.12408635181895	4.09519925287008	4.21805460245918e-05	0.00169806771275357	7	246.5	standard ATAC-Seq in frozen liver
peak_401	chr1	26743682	26745258	1576	13.1998625388193	4.6035823862618	1.1247411780043	4.09301488759417	4.2580037042819e-05	0.00171257456891106	19	550	standard ATAC-Seq in frozen liver
peak_43240	chr1_random	1122059	1122360	301	12.7555312657145	3.93571908721612	0.961647261975655	4.09268475337868	4.26407254962681e-05	0.00171422767786306	4	100	standard ATAC-Seq in frozen liver
peak_60806	chr5	33080609	33080866	257	14.4715709184014	3.04525940314277	0.744256232620515	4.09168142592566	4.28256708831513e-05	0.00172087230946856	8	92	standard ATAC-Seq in frozen liver
peak_36940	chr17	71577413	71577781	368	12.7527367067581	3.93548231674259	0.962011421830305	4.09088938804387	4.29722060458724e-05	0.00172596810506136	6.5	122.5	standard ATAC-Seq in frozen liver
peak_5248	chr1	183673078	183673952	874	7.98093463681995	6.37859939252877	1.56004856444672	4.08871847831929	4.33762891237735e-05	0.00173433395228404	0	193	standard ATAC-Seq in frozen liver
peak_19834	chr12	117071978	117072178	200	7.98093463681995	6.37859939252877	1.56004856444672	4.08871847831929	4.33762891237735e-05	0.00173433395228404	0	43.5	standard ATAC-Seq in frozen liver
peak_26945	chr14	104076342	104077301	959	7.98093463681995	6.37859939252877	1.56004856444672	4.08871847831929	4.33762891237735e-05	0.00173433395228404	0	210	standard ATAC-Seq in frozen liver
peak_34329	chr17	6806133	6806761	628	7.98093463681995	6.37859939252877	1.56004856444672	4.08871847831929	4.33762891237735e-05	0.00173433395228404	0	137.5	standard ATAC-Seq in frozen liver
peak_55947	chr4	60430303	60430660	357	7.98093463681995	6.37859939252877	1.56004856444672	4.08871847831929	4.33762891237735e-05	0.00173433395228404	1	79	standard ATAC-Seq in frozen liver
peak_65086	chr5	147190991	147191329	338	7.98093463681995	6.37859939252877	1.56004856444672	4.08871847831929	4.33762891237735e-05	0.00173433395228404	0	75.5	standard ATAC-Seq in frozen liver
peak_76497	chr8	24205876	24206285	409	7.98093463681995	6.37859939252877	1.56004856444672	4.08871847831929	4.33762891237735e-05	0.00173433395228404	0	90	standard ATAC-Seq in frozen liver
peak_1025	chr1	53750958	53751464	506	7.98233191629816	6.37877737882749	1.5603507073848	4.08804081584872	4.35031624922808e-05	0.00173433395228404	0	109.5	standard ATAC-Seq in frozen liver
peak_29845	chr15	82195271	82195547	276	7.98233191629816	6.37877737882749	1.5603507073848	4.08804081584872	4.35031624922808e-05	0.00173433395228404	0	60.5	standard ATAC-Seq in frozen liver
peak_19763	chr12	116489323	116489528	205	7.97953735734174	6.37842141234804	1.56033288956815	4.08785936321152	4.35371941311947e-05	0.00173433395228404	0	45.5	standard ATAC-Seq in frozen liver
peak_23934	chr13_random	308350	308745	395	7.97953735734174	6.37842141234804	1.56033288956815	4.08785936321152	4.35371941311947e-05	0.00173433395228404	0	86	standard ATAC-Seq in frozen liver
peak_59425	chr4	146717199	146717782	583	7.97953735734174	6.37842141234804	1.56033288956815	4.08785936321152	4.35371941311947e-05	0.00173433395228404	1	129.5	standard ATAC-Seq in frozen liver
peak_60247	chr5	15054227	15054595	368	7.97953735734174	6.37842141234804	1.56033288956815	4.08785936321152	4.35371941311947e-05	0.00173433395228404	0	82	standard ATAC-Seq in frozen liver
peak_69417	chr6	123412815	123413055	240	7.97953735734174	6.37842141234804	1.56033288956815	4.08785936321152	4.35371941311947e-05	0.00173433395228404	0	52	standard ATAC-Seq in frozen liver
peak_85272	chrUn_random	5256204	5256469	265	7.97953735734174	6.37842141234804	1.56033288956815	4.08785936321152	4.35371941311947e-05	0.00173433395228404	0	59	standard ATAC-Seq in frozen liver
peak_22269	chr13	65762684	65762963	279	7.98372919577636	6.37895635642238	1.56124338720091	4.08581801448585	4.39217955133082e-05	0.00174330685783638	0	62	standard ATAC-Seq in frozen liver
peak_22338	chr13	66776488	66776780	292	7.98372919577636	6.37895635642238	1.56124338720091	4.08581801448585	4.39217955133082e-05	0.00174330685783638	0	65.5	standard ATAC-Seq in frozen liver
peak_72565	chr7	71613171	71613464	293	7.98372919577636	6.37895635642238	1.56124338720091	4.08581801448585	4.39217955133082e-05	0.00174330685783638	0	63.5	standard ATAC-Seq in frozen liver
peak_79759	chr8	122413740	122413979	239	7.98372919577636	6.37895635642238	1.56124338720091	4.08581801448585	4.39217955133082e-05	0.00174330685783638	0	54	standard ATAC-Seq in frozen liver
peak_85280	chrUn_random	5327639	5327942	303	7.98372919577636	6.37895635642238	1.56124338720091	4.08581801448585	4.39217955133082e-05	0.00174330685783638	0	69	standard ATAC-Seq in frozen liver
peak_55966	chr4	60694502	60694933	431	7.97674279838533	6.37806153547082	1.5626866157116	4.08147191595831	4.47513858379986e-05	0.00177103070310294	0	95	standard ATAC-Seq in frozen liver
peak_22248	chr13	65569539	65569757	218	7.98652375473278	6.37932111475899	1.56486006184726	4.07660804329584	4.56974269316808e-05	0.00179667255509154	0	48	standard ATAC-Seq in frozen liver
peak_59370	chr4	145184824	145185036	212	7.98652375473278	6.37932111475899	1.56486006184726	4.07660804329584	4.56974269316808e-05	0.00179667255509154	0.5	47.5	standard ATAC-Seq in frozen liver
peak_60237	chr5	15019445	15019927	482	7.98652375473278	6.37932111475899	1.56486006184726	4.07660804329584	4.56974269316808e-05	0.00179667255509154	0	109	standard ATAC-Seq in frozen liver
peak_77394	chr8	57978696	57978896	200	7.98652375473278	6.37932111475899	1.56486006184726	4.07660804329584	4.56974269316808e-05	0.00179667255509154	0	44.5	standard ATAC-Seq in frozen liver
peak_85343	chrX	4232662	4232982	320	7.98652375473278	6.37932111475899	1.56486006184726	4.07660804329584	4.56974269316808e-05	0.00179667255509154	0	71.5	standard ATAC-Seq in frozen liver
peak_22340	chr13	66811426	66811632	206	7.97534551890712	6.37787773949663	1.5647909278947	4.07586574397997	4.58434644014192e-05	0.00180079630204121	0	45.5	standard ATAC-Seq in frozen liver
peak_59368	chr4	145177998	145178233	235	7.98792103421099	6.37950870400562	1.56763936509753	4.06950019630867	4.71140999747718e-05	0.00184079415879109	0.5	52	standard ATAC-Seq in frozen liver
peak_55933	chr4	60161118	60161370	252	7.97394823942892	6.37769015643272	1.5675547666828	4.06855970329442	4.73046407766129e-05	0.00184659003395557	0	54	standard ATAC-Seq in frozen liver
peak_65752	chr6	18794547	18794958	411	12.9613050221288	4.57552257381747	1.12827720115336	4.05531776157511	5.0066193842441e-05	0.00193796692565086	6.5	141.5	standard ATAC-Seq in frozen liver
peak_10702	chr11	3012891	3013108	217	7.74689990488788	6.33562240938868	1.56385022199497	4.05129744542062	5.0934408405772e-05	0.00196110078601217	0	47	standard ATAC-Seq in frozen liver
peak_22257	chr13	65687263	65687547	284	7.74689990488788	6.33562240938868	1.56385022199497	4.05129744542062	5.0934408405772e-05	0.00196110078601217	0	60.5	standard ATAC-Seq in frozen liver
peak_23935	chr13_random	309445	309649	204	7.74689990488788	6.33562240938868	1.56385022199497	4.05129744542062	5.0934408405772e-05	0.00196110078601217	0	44	standard ATAC-Seq in frozen liver
peak_36800	chr17	66502309	66502803	494	7.74689990488788	6.33562240938868	1.56385022199497	4.05129744542062	5.0934408405772e-05	0.00196110078601217	1	104.5	standard ATAC-Seq in frozen liver
peak_54232	chr3	151977644	151977994	350	7.74689990488788	6.33562240938868	1.56385022199497	4.05129744542062	5.0934408405772e-05	0.00196110078601217	1	75	standard ATAC-Seq in frozen liver
peak_19796	chr12	116745673	116745964	291	7.74550262540967	6.3354389889506	1.56384170254424	4.05120222759333	5.09551433105003e-05	0.00196110078601217	0	62	standard ATAC-Seq in frozen liver
peak_43861	chr2	22868946	22869303	357	7.74550262540967	6.3354389889506	1.56384170254424	4.05120222759333	5.09551433105003e-05	0.00196110078601217	0	78	standard ATAC-Seq in frozen liver
peak_55981	chr4	60898587	60899116	529	7.74550262540967	6.3354389889506	1.56384170254424	4.05120222759333	5.09551433105003e-05	0.00196110078601217	0	110.5	standard ATAC-Seq in frozen liver
peak_23939	chr13_random	400083	400310	227	7.74829718436609	6.33580635771341	1.56448305771885	4.04977626728125	5.12666230918621e-05	0.0019655813461108	0	48	standard ATAC-Seq in frozen liver
peak_63338	chr5	115341187	115341553	366	7.74829718436609	6.33580635771341	1.56448305771885	4.04977626728125	5.12666230918621e-05	0.0019655813461108	0.5	78	standard ATAC-Seq in frozen liver
peak_68863	chr6	114461351	114461953	602	7.74829718436609	6.33580635771341	1.56448305771885	4.04977626728125	5.12666230918621e-05	0.0019655813461108	0	128	standard ATAC-Seq in frozen liver
peak_75	chr1	9226482	9226907	425	7.74410534593147	6.33525505027969	1.56445761832548	4.04948972479079	5.13294313844066e-05	0.0019655813461108	0	91	standard ATAC-Seq in frozen liver
peak_9675	chr10	102131133	102131481	348	7.74410534593147	6.33525505027969	1.56445761832548	4.04948972479079	5.13294313844066e-05	0.0019655813461108	0	73.5	standard ATAC-Seq in frozen liver
peak_22266	chr13	65761022	65761311	289	7.74410534593147	6.33525505027969	1.56445761832548	4.04948972479079	5.13294313844066e-05	0.0019655813461108	0	61	standard ATAC-Seq in frozen liver
peak_22732	chr13	87771609	87771994	385	7.74410534593147	6.33525505027969	1.56445761832548	4.04948972479079	5.13294313844066e-05	0.0019655813461108	0	81	standard ATAC-Seq in frozen liver
peak_76631	chr8	27080039	27080434	395	7.74410534593147	6.33525505027969	1.56445761832548	4.04948972479079	5.13294313844066e-05	0.0019655813461108	0	85.5	standard ATAC-Seq in frozen liver
peak_85114	chrUn_random	221076	221640	564	7.74410534593147	6.33525505027969	1.56445761832548	4.04948972479079	5.13294313844066e-05	0.0019655813461108	0	120.5	standard ATAC-Seq in frozen liver
peak_87174	chrX	146922402	146922766	364	12.5242910927389	3.90744465104423	0.965551760463562	4.04685156305682	5.19111362691519e-05	0.00198244180195847	6	117.5	standard ATAC-Seq in frozen liver
peak_60803	chr5	33072827	33073091	264	12.5134438032371	3.9072850358356	0.96556343274373	4.04663733456923	5.19586461060981e-05	0.00198244180195847	4	86.5	standard ATAC-Seq in frozen liver
peak_2000	chr1	84991487	84991878	391	7.74969446384429	6.33599187461251	1.56574948369135	4.04661916903529	5.19626766038543e-05	0.00198244180195847	1	82.5	standard ATAC-Seq in frozen liver
peak_55957	chr4	60534276	60534889	613	7.74969446384429	6.33599187461251	1.56574948369135	4.04661916903529	5.19626766038543e-05	0.00198244180195847	0	131	standard ATAC-Seq in frozen liver
peak_59398	chr4	146131285	146131485	200	7.74969446384429	6.33599187461251	1.56574948369135	4.04661916903529	5.19626766038543e-05	0.00198244180195847	0	43.5	standard ATAC-Seq in frozen liver
peak_85794	chrX	32068898	32069115	217	7.74969446384429	6.33599187461251	1.56574948369135	4.04661916903529	5.19626766038543e-05	0.00198244180195847	0	46.5	standard ATAC-Seq in frozen liver
peak_22237	chr13	65476894	65477291	397	7.74270806645326	6.33506955055679	1.56570748590939	4.04613863545353	5.20694031670153e-05	0.00198391906651024	0	83.5	standard ATAC-Seq in frozen liver
peak_22246	chr13	65551882	65552184	302	7.74270806645326	6.33506955055679	1.56570748590939	4.04613863545353	5.20694031670153e-05	0.00198391906651024	0	63.5	standard ATAC-Seq in frozen liver
peak_54886	chr4	31281199	31281560	361	17.6311679316386	6.0580987667544	1.49785537118221	4.04451516702372	5.24315142016543e-05	0.00199511030061503	1	174.5	standard ATAC-Seq in frozen liver
peak_60265	chr5	15169143	15169690	547	7.7510917433225	6.33617996038102	1.56766868252826	4.04178512398572	5.30458304117043e-05	0.00201323418551689	1	116.5	standard ATAC-Seq in frozen liver
peak_69418	chr6	123416357	123416743	386	7.7510917433225	6.33617996038102	1.56766868252826	4.04178512398572	5.30458304117043e-05	0.00201323418551689	0	83	standard ATAC-Seq in frozen liver
peak_72567	chr7	71621435	71621645	210	7.7510917433225	6.33617996038102	1.56766868252826	4.04178512398572	5.30458304117043e-05	0.00201323418551689	0	45.5	standard ATAC-Seq in frozen liver
peak_22261	chr13	65728618	65728913	295	7.74131078697505	6.33488147963501	1.5676107397161	4.04110620011591	5.31996578896571e-05	0.00201732272913557	0	64	standard ATAC-Seq in frozen liver
peak_43220	chr1_random	780561	780761	200	7.74131078697505	6.33488147963501	1.5676107397161	4.04110620011591	5.31996578896571e-05	0.00201732272913557	0	41.5	standard ATAC-Seq in frozen liver
peak_59286	chr4	142831463	142831747	284	7.75248902280071	6.33637154588779	1.57025604930943	4.03524733986818	5.45448073016346e-05	0.00206118609250076	0	60.5	standard ATAC-Seq in frozen liver
peak_37627	chr17	87647598	87647868	270	7.73991350749685	6.33468991116994	1.57017710108799	4.03437924727127	5.47468347632128e-05	0.00206792759242193	0	56.5	standard ATAC-Seq in frozen liver
peak_60274	chr5	15203721	15203951	230	12.7331903544334	4.54937917922028	1.13019717408583	4.02529689821607	5.69034753436247e-05	0.00213464863206116	2	78	standard ATAC-Seq in frozen liver
peak_54383	chr4	3103892	3104238	346	17.4065832097301	6.0387120932753	1.50140596860244	4.02203815594014	5.76967083902853e-05	0.00215885345088045	2	165	standard ATAC-Seq in frozen liver
peak_1619	chr1	72742905	72743123	218	7.5114678934776	6.29113660609054	1.56771032771167	4.01294581969968	5.99656807612588e-05	0.0022247292982385	0	44.5	standard ATAC-Seq in frozen liver
peak_16795	chr12	22811581	22811781	200	7.5114678934776	6.29113660609054	1.56771032771167	4.01294581969968	5.99656807612588e-05	0.0022247292982385	0	41.5	standard ATAC-Seq in frozen liver
peak_22250	chr13	65585891	65586325	434	7.5114678934776	6.29113660609054	1.56771032771167	4.01294581969968	5.99656807612588e-05	0.0022247292982385	0	90.5	standard ATAC-Seq in frozen liver
peak_23922	chr13_random	114445	114815	370	7.5114678934776	6.29113660609054	1.56771032771167	4.01294581969968	5.99656807612588e-05	0.0022247292982385	0	75	standard ATAC-Seq in frozen liver
peak_35606	chr17	33391726	33392388	662	7.5114678934776	6.29113660609054	1.56771032771167	4.01294581969968	5.99656807612588e-05	0.0022247292982385	0	138.5	standard ATAC-Seq in frozen liver
peak_43189	chr1_random	109419	109944	525	7.5114678934776	6.29113660609054	1.56771032771167	4.01294581969968	5.99656807612588e-05	0.0022247292982385	0	108.5	standard ATAC-Seq in frozen liver
peak_68897	chr6	114613680	114614090	410	7.5114678934776	6.29113660609054	1.56771032771167	4.01294581969968	5.99656807612588e-05	0.0022247292982385	0	83.5	standard ATAC-Seq in frozen liver
peak_70595	chr6	148587414	148587638	224	7.5114678934776	6.29113660609054	1.56771032771167	4.01294581969968	5.99656807612588e-05	0.0022247292982385	0	46.5	standard ATAC-Seq in frozen liver
peak_19786	chr12	116648992	116649195	203	7.51286517295581	6.29132607450715	1.56805003168221	4.0121972815866	6.01561939027147e-05	0.0022252078021699	0	43	standard ATAC-Seq in frozen liver
peak_45203	chr2	57075484	57075729	245	7.51286517295581	6.29132607450715	1.56805003168221	4.0121972815866	6.01561939027147e-05	0.0022252078021699	0	51	standard ATAC-Seq in frozen liver
peak_24129	chr14	13993002	13993202	200	7.51007061399939	6.29094714093155	1.56803407701516	4.01199644392087	6.02074072548625e-05	0.0022252078021699	0	40.5	standard ATAC-Seq in frozen liver
peak_40338	chr18	82871192	82871417	225	7.51007061399939	6.29094714093155	1.56803407701516	4.01199644392087	6.02074072548625e-05	0.0022252078021699	0	47	standard ATAC-Seq in frozen liver
peak_53862	chr3	141854532	141854877	345	7.51007061399939	6.29094714093155	1.56803407701516	4.01199644392087	6.02074072548625e-05	0.0022252078021699	0	71	standard ATAC-Seq in frozen liver
peak_55936	chr4	60172048	60172502	454	7.51007061399939	6.29094714093155	1.56803407701516	4.01199644392087	6.02074072548625e-05	0.0022252078021699	0	94.5	standard ATAC-Seq in frozen liver
peak_85285	chrUn_random	5339103	5339390	287	7.51007061399939	6.29094714093155	1.56803407701516	4.01199644392087	6.02074072548625e-05	0.0022252078021699	0	59.5	standard ATAC-Seq in frozen liver
peak_87516	chrY_random	29677820	29678217	397	7.51007061399939	6.29094714093155	1.56803407701516	4.01199644392087	6.02074072548625e-05	0.0022252078021699	0	83	standard ATAC-Seq in frozen liver
peak_22260	chr13	65718740	65718948	208	7.51426245243401	6.29151665633435	1.56905829139901	4.00974054999874	6.07855007816809e-05	0.00223812937914693	0	43	standard ATAC-Seq in frozen liver
peak_22331	chr13	66693235	66693495	260	7.51426245243401	6.29151665633435	1.56905829139901	4.00974054999874	6.07855007816809e-05	0.00223812937914693	0	54	standard ATAC-Seq in frozen liver
peak_44009	chr2	26192491	26193002	511	7.51426245243401	6.29151665633435	1.56905829139901	4.00974054999874	6.07855007816809e-05	0.00223812937914693	0	104.5	standard ATAC-Seq in frozen liver
peak_59381	chr4	145584507	145584753	246	7.51426245243401	6.29151665633435	1.56905829139901	4.00974054999874	6.07855007816809e-05	0.00223812937914693	0	51	standard ATAC-Seq in frozen liver
peak_59404	chr4	146239757	146240141	384	7.51426245243401	6.29151665633435	1.56905829139901	4.00974054999874	6.07855007816809e-05	0.00223812937914693	0	82	standard ATAC-Seq in frozen liver
peak_71973	chr7	46580189	46580391	202	7.51426245243401	6.29151665633435	1.56905829139901	4.00974054999874	6.07855007816809e-05	0.00223812937914693	0	41.5	standard ATAC-Seq in frozen liver
peak_14550	chr11	98514324	98514625	301	17.1697539188417	6.01868908640558	1.50112917093924	4.00944116130911	6.08626157391205e-05	0.00223812937914693	2.5	143	standard ATAC-Seq in frozen liver
peak_53079	chr3	116521973	116522308	335	7.50867333452119	6.29075656853798	1.56902665573224	4.00933696413346	6.08894760194796e-05	0.00223812937914693	0	68.5	standard ATAC-Seq in frozen liver
peak_60266	chr5	15176875	15177331	456	7.50867333452119	6.29075656853798	1.56902665573224	4.00933696413346	6.08894760194796e-05	0.00223812937914693	0	93.5	standard ATAC-Seq in frozen liver
peak_85795	chrX	32114652	32114917	265	7.50867333452119	6.29075656853798	1.56902665573224	4.00933696413346	6.08894760194796e-05	0.00223812937914693	0	54	standard ATAC-Seq in frozen liver
peak_68886	chr6	114547130	114547388	258	7.51565973191222	6.29170945450497	1.57075098658214	4.005542258608	6.18753701084094e-05	0.0022658035633966	0	54	standard ATAC-Seq in frozen liver
peak_71945	chr7	39200432	39200732	300	7.51565973191222	6.29170945450497	1.57075098658214	4.005542258608	6.18753701084094e-05	0.0022658035633966	0	63	standard ATAC-Seq in frozen liver
peak_85147	chrUn_random	2480086	2480369	283	7.51565973191222	6.29170945450497	1.57075098658214	4.005542258608	6.18753701084094e-05	0.0022658035633966	0	59.5	standard ATAC-Seq in frozen liver
peak_70814	chr7	12600984	12601262	278	7.50727605504298	6.29056378606922	1.57070422611518	4.00493210719097	6.20352957336679e-05	0.00227070976466536	0	57.5	standard ATAC-Seq in frozen liver
peak_60259	chr5	15151439	15151978	539	12.4935665045885	4.52095456458442	1.12920535661931	4.00366021829682	6.23699270752436e-05	0.00228105041692363	6	176.5	standard ATAC-Seq in frozen liver
peak_85293	chrUn_random	5483855	5484330	475	12.4963610635449	4.52119254481678	1.13027925922797	4.00006680464522	6.33246050936002e-05	0.00230728814037752	4	158	standard ATAC-Seq in frozen liver
peak_59366	chr4	145167603	145167836	233	7.51705701139043	6.29190547425455	1.57315578360044	3.99954380859498	6.34646995331968e-05	0.00231046881798912	0	49	standard ATAC-Seq in frozen liver
peak_7349	chr10	47173227	47173521	294	7.50587877556477	6.29036775862304	1.57309474332562	3.99872149170418	6.36855662006401e-05	0.00231573197855928	0	60.5	standard ATAC-Seq in frozen liver
peak_25408	chr14	48249008	48249336	328	13.2728053368994	3.19842931211552	0.800877714952361	3.99365502672999	6.5062505264508e-05	0.00235980331464752	10	108.5	standard ATAC-Seq in frozen liver
peak_33227	chr16	61056034	61056370	336	16.6922344449539	5.97793972806094	1.50126387838832	3.98193802842878	6.83556048111564e-05	0.00245886320487776	1	152.5	standard ATAC-Seq in frozen liver
peak_85164	chrUn_random	3396405	3396695	290	7.51985157034684	6.29231111447194	1.58026076874956	3.98181821564231	6.83900792331503e-05	0.00245909258192526	0	62	standard ATAC-Seq in frozen liver
peak_19837	chr12	117088412	117088735	323	7.27743316154553	6.24543076909147	1.57205533626711	3.97278048998036	7.10385087928629e-05	0.00252800887420999	0	64.5	standard ATAC-Seq in frozen liver
peak_22265	chr13	65751352	65751736	384	7.27743316154553	6.24543076909147	1.57205533626711	3.97278048998036	7.10385087928629e-05	0.00252800887420999	1	78.5	standard ATAC-Seq in frozen liver
peak_40013	chr18	73607395	73607708	313	7.27743316154553	6.24543076909147	1.57205533626711	3.97278048998036	7.10385087928629e-05	0.00252800887420999	0	62	standard ATAC-Seq in frozen liver
peak_68853	chr6	114291136	114291953	817	7.27743316154553	6.24543076909147	1.57205533626711	3.97278048998036	7.10385087928629e-05	0.00252800887420999	2	164.5	standard ATAC-Seq in frozen liver
peak_77689	chr8	72056757	72057011	254	7.27743316154553	6.24543076909147	1.57205533626711	3.97278048998036	7.10385087928629e-05	0.00252800887420999	0.5	51	standard ATAC-Seq in frozen liver
peak_85135	chrUn_random	2423612	2423927	315	7.27743316154553	6.24543076909147	1.57205533626711	3.97278048998036	7.10385087928629e-05	0.00252800887420999	0	64	standard ATAC-Seq in frozen liver
peak_85275	chrUn_random	5321669	5322417	748	7.27743316154553	6.24543076909147	1.57205533626711	3.97278048998036	7.10385087928629e-05	0.00252800887420999	2	151	standard ATAC-Seq in frozen liver
peak_101	chr1	9864314	9864665	351	7.27603588206732	6.24523511569679	1.57204842732012	3.97267349221747	7.10704370680642e-05	0.00252800887420999	0	69.5	standard ATAC-Seq in frozen liver
peak_20357	chr13	21856210	21856818	608	7.27603588206732	6.24523511569679	1.57204842732012	3.97267349221747	7.10704370680642e-05	0.00252800887420999	0	122.5	standard ATAC-Seq in frozen liver
peak_34153	chr17	3012921	3013123	202	7.27603588206732	6.24523511569679	1.57204842732012	3.97267349221747	7.10704370680642e-05	0.00252800887420999	0	40	standard ATAC-Seq in frozen liver
peak_55988	chr4	60973891	60974400	509	7.27603588206732	6.24523511569679	1.57204842732012	3.97267349221747	7.10704370680642e-05	0.00252800887420999	0.5	100	standard ATAC-Seq in frozen liver
peak_72474	chr7	66939614	66939835	221	7.27603588206732	6.24523511569679	1.57204842732012	3.97267349221747	7.10704370680642e-05	0.00252800887420999	0	45.5	standard ATAC-Seq in frozen liver
peak_85347	chrX	4303772	4303979	207	7.27603588206732	6.24523511569679	1.57204842732012	3.97267349221747	7.10704370680642e-05	0.00252800887420999	0	40.5	standard ATAC-Seq in frozen liver
peak_19831	chr12	117058955	117059156	201	10.8103106121779	6.816207967921	1.71579693097304	3.97261927963439	7.10866193561488e-05	0.00252800887420999	0	62	standard ATAC-Seq in frozen liver
peak_19802	chr12	116793040	116793254	214	7.27883044102374	6.24562701478045	1.57277152811108	3.97109618475961	7.15426856032771e-05	0.00253633272070247	0.5	44	standard ATAC-Seq in frozen liver
peak_19855	chr12	117237370	117237672	302	7.27883044102374	6.24562701478045	1.57277152811108	3.97109618475961	7.15426856032771e-05	0.00253633272070247	0	61	standard ATAC-Seq in frozen liver
peak_22295	chr13	66246015	66246545	530	7.27883044102374	6.24562701478045	1.57277152811108	3.97109618475961	7.15426856032771e-05	0.00253633272070247	0	107.5	standard ATAC-Seq in frozen liver
peak_85126	chrUn_random	2375147	2375762	615	7.27883044102374	6.24562701478045	1.57277152811108	3.97109618475961	7.15426856032771e-05	0.00253633272070247	0	124.5	standard ATAC-Seq in frozen liver
peak_23924	chr13_random	123948	124511	563	7.27463860258912	6.24503887206377	1.57275096283449	3.97077415283132	7.16394666938209e-05	0.00253633272070247	0	115	standard ATAC-Seq in frozen liver
peak_48453	chr2	154842577	154842877	300	7.27463860258912	6.24503887206377	1.57275096283449	3.97077415283132	7.16394666938209e-05	0.00253633272070247	0	59.5	standard ATAC-Seq in frozen liver
peak_85241	chrUn_random	4741711	4742247	536	7.27463860258912	6.24503887206377	1.57275096283449	3.97077415283132	7.16394666938209e-05	0.00253633272070247	0	109	standard ATAC-Seq in frozen liver
peak_85363	chrX	4781472	4781937	465	7.27463860258912	6.24503887206377	1.57275096283449	3.97077415283132	7.16394666938209e-05	0.00253633272070247	1	94	standard ATAC-Seq in frozen liver
peak_85735	chrX	21257561	21257897	336	7.27463860258912	6.24503887206377	1.57275096283449	3.97077415283132	7.16394666938209e-05	0.00253633272070247	0	69	standard ATAC-Seq in frozen liver
peak_7563	chr10	58845585	58846171	586	7.28022772050194	6.24582503068514	1.57420874047465	3.96759646297093	7.26011295064717e-05	0.00256519105905406	0	121.5	standard ATAC-Seq in frozen liver
peak_79762	chr8	122420564	122420866	302	7.28022772050194	6.24582503068514	1.57420874047465	3.96759646297093	7.26011295064717e-05	0.00256519105905406	0.5	61	standard ATAC-Seq in frozen liver
peak_34366	chr17	8145094	8145418	324	7.27324132311091	6.2448408583334	1.57417500887297	3.96705628226456	7.27658135181613e-05	0.00256583047272198	0	64.5	standard ATAC-Seq in frozen liver
peak_44646	chr2	33789346	33790038	692	7.27324132311091	6.2448408583334	1.57417500887297	3.96705628226456	7.27658135181613e-05	0.00256583047272198	0	138	standard ATAC-Seq in frozen liver
peak_49825	chr3	6115990	6116283	293	7.27324132311091	6.2448408583334	1.57417500887297	3.96705628226456	7.27658135181613e-05	0.00256583047272198	0	58	standard ATAC-Seq in frozen liver
peak_55929	chr4	60102730	60103259	529	7.27324132311091	6.2448408583334	1.57417500887297	3.96705628226456	7.27658135181613e-05	0.00256583047272198	1	105.5	standard ATAC-Seq in frozen liver
peak_77957	chr8	74751557	74751946	389	7.27324132311091	6.2448408583334	1.57417500887297	3.96705628226456	7.27658135181613e-05	0.00256583047272198	1.5	75.5	standard ATAC-Seq in frozen liver
peak_73346	chr7	89919543	89920647	1104	12.2539426547436	4.49196221153668	1.13246610907245	3.96653125029573	7.29262177145688e-05	0.00256941612244821	13	353.5	standard ATAC-Seq in frozen liver
peak_85201	chrUn_random	3916577	3916790	213	16.4606633256544	5.95699126458252	1.50219573563784	3.96552268340259	7.32352869405992e-05	0.00257807413928953	1	95.5	standard ATAC-Seq in frozen liver
peak_85267	chrUn_random	5187514	5187875	361	16.4540078745872	5.95696242024165	1.50222814119969	3.96541793943787	7.32674560121075e-05	0.00257807413928953	1	159.5	standard ATAC-Seq in frozen liver
peak_23576	chr13	111393120	111393471	351	12.2592008263326	4.49160365871666	1.13274177280536	3.96524942096267	7.33192396244432e-05	0.00257807413928953	3.5	113.5	standard ATAC-Seq in frozen liver
peak_22341	chr13	66811953	66812391	438	7.28302227945836	6.24623089708802	1.57937752573271	3.95486879819329	7.65766634429895e-05	0.00267648283061781	1	87	standard ATAC-Seq in frozen liver
peak_85258	chrUn_random	5103423	5103684	261	7.28302227945836	6.24623089708802	1.57937752573271	3.95486879819329	7.65766634429895e-05	0.00267648283061781	0	53	standard ATAC-Seq in frozen liver
peak_85354	chrX	4658534	4659081	547	7.28302227945836	6.24623089708802	1.57937752573271	3.95486879819329	7.65766634429895e-05	0.00267648283061781	0	108.5	standard ATAC-Seq in frozen liver
peak_68873	chr6	114501474	114501738	264	7.2704467641545	6.24443502534188	1.57928766076242	3.95395669863418	7.68693269448218e-05	0.00268456768750354	0	53	standard ATAC-Seq in frozen liver
peak_22328	chr13	66690075	66690275	200	7.28441955893656	6.24644066162699	1.58312411508042	3.94564178646833	7.95865203419267e-05	0.00276621631207509	0	41	standard ATAC-Seq in frozen liver
peak_85758	chrX	30479215	30479467	252	7.26904948467629	6.2442251003526	1.58306315599197	3.94439418081199	8.00019706217732e-05	0.00277571207971486	0	50.5	standard ATAC-Seq in frozen liver
peak_1832	chr1	76567080	76567400	320	7.04200115013525	6.19802725209393	1.57664971807631	3.93113776702172	8.45448053244904e-05	0.00289181769875684	0	62.5	standard ATAC-Seq in frozen liver
peak_23936	chr13_random	317868	318380	512	7.04200115013525	6.19802725209393	1.57664971807631	3.93113776702172	8.45448053244904e-05	0.00289181769875684	0	101	standard ATAC-Seq in frozen liver
peak_34327	chr17	6654690	6655316	626	7.04200115013525	6.19802725209393	1.57664971807631	3.93113776702172	8.45448053244904e-05	0.00289181769875684	0	121.5	standard ATAC-Seq in frozen liver
peak_46091	chr2	84346282	84347026	744	7.04200115013525	6.19802725209393	1.57664971807631	3.93113776702172	8.45448053244904e-05	0.00289181769875684	0	146.5	standard ATAC-Seq in frozen liver
peak_60203	chr5	14900022	14900327	305	7.04200115013525	6.19802725209393	1.57664971807631	3.93113776702172	8.45448053244904e-05	0.00289181769875684	0	58.5	standard ATAC-Seq in frozen liver
peak_71197	chr7	23559898	23560355	457	7.04200115013525	6.19802725209393	1.57664971807631	3.93113776702172	8.45448053244904e-05	0.00289181769875684	0	89.5	standard ATAC-Seq in frozen liver
peak_85290	chrUn_random	5473832	5474806	974	7.04200115013525	6.19802725209393	1.57664971807631	3.93113776702172	8.45448053244904e-05	0.00289181769875684	1	192	standard ATAC-Seq in frozen liver
peak_85942	chrX	42960005	42960258	253	7.04200115013525	6.19802725209393	1.57664971807631	3.93113776702172	8.45448053244904e-05	0.00289181769875684	0	49.5	standard ATAC-Seq in frozen liver
peak_19738	chr12	116067623	116067847	224	7.04339842961346	6.19822989850102	1.57703352194218	3.93030954146597	8.48365723552492e-05	0.00289181769875684	0	44.5	standard ATAC-Seq in frozen liver
peak_19873	chr12	117916611	117916983	372	7.04339842961346	6.19822989850102	1.57703352194218	3.93030954146597	8.48365723552492e-05	0.00289181769875684	0	72	standard ATAC-Seq in frozen liver
peak_56018	chr4	61330521	61331085	564	7.04339842961346	6.19822989850102	1.57703352194218	3.93030954146597	8.48365723552492e-05	0.00289181769875684	0	110.5	standard ATAC-Seq in frozen liver
peak_68864	chr6	114463504	114463888	384	7.04339842961346	6.19822989850102	1.57703352194218	3.93030954146597	8.48365723552492e-05	0.00289181769875684	0	75.5	standard ATAC-Seq in frozen liver
peak_76706	chr8	30627173	30627605	432	7.04339842961346	6.19822989850102	1.57703352194218	3.93030954146597	8.48365723552492e-05	0.00289181769875684	0	84	standard ATAC-Seq in frozen liver
peak_86513	chrX	92167727	92168076	349	7.04339842961346	6.19822989850102	1.57703352194218	3.93030954146597	8.48365723552492e-05	0.00289181769875684	0	68.5	standard ATAC-Seq in frozen liver
peak_86877	chrX	123312174	123312602	428	7.04339842961346	6.19822989850102	1.57703352194218	3.93030954146597	8.48365723552492e-05	0.00289181769875684	1	83.5	standard ATAC-Seq in frozen liver
peak_38417	chr18	26163122	26163746	624	11.8124059405952	3.81748517302056	0.97129716470227	3.93029580621778	8.48414190150235e-05	0.00289181769875684	11	191.5	standard ATAC-Seq in frozen liver
peak_6043	chr10	7622426	7622784	358	7.04060387065704	6.19782460328238	1.5770233837994	3.9300778079463	8.49183775615018e-05	0.00289181769875684	0.5	71.5	standard ATAC-Seq in frozen liver
peak_32971	chr16	50030548	50030856	308	7.04060387065704	6.19782460328238	1.5770233837994	3.9300778079463	8.49183775615018e-05	0.00289181769875684	0	60	standard ATAC-Seq in frozen liver
peak_45765	chr2	72112115	72112749	634	7.04060387065704	6.19782460328238	1.5770233837994	3.9300778079463	8.49183775615018e-05	0.00289181769875684	0	126	standard ATAC-Seq in frozen liver
peak_60222	chr5	14963106	14963646	540	7.04060387065704	6.19782460328238	1.5770233837994	3.9300778079463	8.49183775615018e-05	0.00289181769875684	1	103.5	standard ATAC-Seq in frozen liver
peak_69355	chr6	121956525	121956929	404	7.04060387065704	6.19782460328238	1.5770233837994	3.9300778079463	8.49183775615018e-05	0.00289181769875684	0	76.5	standard ATAC-Seq in frozen liver
peak_69421	chr6	123489765	123490201	436	7.04060387065704	6.19782460328238	1.5770233837994	3.9300778079463	8.49183775615018e-05	0.00289181769875684	0	83	standard ATAC-Seq in frozen liver
peak_70805	chr7	9314786	9315255	469	7.04060387065704	6.19782460328238	1.5770233837994	3.9300778079463	8.49183775615018e-05	0.00289181769875684	0	93.5	standard ATAC-Seq in frozen liver
peak_85175	chrUn_random	3581095	3581296	201	7.04060387065704	6.19782460328238	1.5770233837994	3.9300778079463	8.49183775615018e-05	0.00289181769875684	0.5	38.5	standard ATAC-Seq in frozen liver
peak_85233	chrUn_random	4320080	4320575	495	7.04060387065704	6.19782460328238	1.5770233837994	3.9300778079463	8.49183775615018e-05	0.00289181769875684	0	96	standard ATAC-Seq in frozen liver
peak_85287	chrUn_random	5341534	5342255	721	7.04060387065704	6.19782460328238	1.5770233837994	3.9300778079463	8.49183775615018e-05	0.00289181769875684	0	140.5	standard ATAC-Seq in frozen liver
peak_4780	chr1	173015425	173015625	200	7.04479570909166	6.19843380114888	1.57818128116475	3.92758035792582	8.58047561809141e-05	0.00291067692100675	0	38.5	standard ATAC-Seq in frozen liver
peak_25155	chr14	42304646	42304951	305	7.04479570909166	6.19843380114888	1.57818128116475	3.92758035792582	8.58047561809141e-05	0.00291067692100675	0	60.5	standard ATAC-Seq in frozen liver
peak_25235	chr14	44682884	44683118	234	7.04479570909166	6.19843380114888	1.57818128116475	3.92758035792582	8.58047561809141e-05	0.00291067692100675	0	47	standard ATAC-Seq in frozen liver
peak_34566	chr17	13651728	13651941	213	7.04479570909166	6.19843380114888	1.57818128116475	3.92758035792582	8.58047561809141e-05	0.00291067692100675	0	42	standard ATAC-Seq in frozen liver
peak_36647	chr17	63086764	63087130	366	7.04479570909166	6.19843380114888	1.57818128116475	3.92758035792582	8.58047561809141e-05	0.00291067692100675	1	71	standard ATAC-Seq in frozen liver
peak_45219	chr2	58278326	58278929	603	7.04479570909166	6.19843380114888	1.57818128116475	3.92758035792582	8.58047561809141e-05	0.00291067692100675	0	120	standard ATAC-Seq in frozen liver
peak_74066	chr7	111921274	111921479	205	7.04479570909166	6.19843380114888	1.57818128116475	3.92758035792582	8.58047561809141e-05	0.00291067692100675	0	40.5	standard ATAC-Seq in frozen liver
peak_85154	chrUn_random	2539268	2539710	442	7.04479570909166	6.19843380114888	1.57818128116475	3.92758035792582	8.58047561809141e-05	0.00291067692100675	0	85.5	standard ATAC-Seq in frozen liver
peak_85279	chrUn_random	5327278	5327504	226	7.04479570909166	6.19843380114888	1.57818128116475	3.92758035792582	8.58047561809141e-05	0.00291067692100675	0	44	standard ATAC-Seq in frozen liver
peak_2024	chr1	87356922	87357150	228	7.03920659117884	6.19762069344213	1.57816140282802	3.92711460458745	8.59710225465537e-05	0.00291180260149065	0	44.5	standard ATAC-Seq in frozen liver
peak_19795	chr12	116733729	116734510	781	7.03920659117884	6.19762069344213	1.57816140282802	3.92711460458745	8.59710225465537e-05	0.00291180260149065	0	147	standard ATAC-Seq in frozen liver
peak_19843	chr12	117121559	117121759	200	7.03920659117884	6.19762069344213	1.57816140282802	3.92711460458745	8.59710225465537e-05	0.00291180260149065	0	38.5	standard ATAC-Seq in frozen liver
peak_5335	chr1	185896325	185896774	449	11.8183260048319	3.81884297682346	0.972959884302478	3.92497474812254	8.67388363875977e-05	0.00293100240224176	8	137.5	standard ATAC-Seq in frozen liver
peak_11695	chr11	41446029	41446328	299	7.04619298856987	6.19864021614474	1.58011330337663	3.92290869452116	8.74863128114031e-05	0.00294715727903818	0	59	standard ATAC-Seq in frozen liver
peak_49589	chr2	176329670	176330044	374	7.04619298856987	6.19864021614474	1.58011330337663	3.92290869452116	8.74863128114031e-05	0.00294715727903818	0	74.5	standard ATAC-Seq in frozen liver
peak_85130	chrUn_random	2392222	2392526	304	7.04619298856987	6.19864021614474	1.58011330337663	3.92290869452116	8.74863128114031e-05	0.00294715727903818	0	59	standard ATAC-Seq in frozen liver
peak_37758	chr17_random	348153	348673	520	7.03780931170063	6.19741427118971	1.58008449058439	3.92220435560229	8.77425232254421e-05	0.00295237904274028	0	102	standard ATAC-Seq in frozen liver
peak_59373	chr4	145278047	145278289	242	7.03780931170063	6.19741427118971	1.58008449058439	3.92220435560229	8.77425232254421e-05	0.00295237904274028	0	46.5	standard ATAC-Seq in frozen liver
peak_71962	chr7	46444083	46444322	239	7.03780931170063	6.19741427118971	1.58008449058439	3.92220435560229	8.77425232254421e-05	0.00295237904274028	0	46	standard ATAC-Seq in frozen liver
peak_2002	chr1	85006562	85006868	306	7.04759026804808	6.19885021354104	1.58283982578877	3.91628395529661	8.9924326205321e-05	0.00301767143602895	0	60	standard ATAC-Seq in frozen liver
peak_2032	chr1	87448315	87448552	237	7.04759026804808	6.19885021354104	1.58283982578877	3.91628395529661	8.9924326205321e-05	0.00301767143602895	0	46.5	standard ATAC-Seq in frozen liver
peak_43538	chr2	10983806	10984126	320	7.04759026804808	6.19885021354104	1.58283982578877	3.91628395529661	8.9924326205321e-05	0.00301767143602895	0	62.5	standard ATAC-Seq in frozen liver
peak_86509	chrX	92123272	92123492	220	7.04759026804808	6.19885021354104	1.58283982578877	3.91628395529661	8.9924326205321e-05	0.00301767143602895	0	42.5	standard ATAC-Seq in frozen liver
peak_7516	chr10	57684170	57684653	483	15.7543672914236	5.89272269406891	1.50481404132733	3.91591421413851	9.00622706701579e-05	0.00301882798421354	2	204.5	standard ATAC-Seq in frozen liver
peak_54610	chr4	10844671	10844955	284	7.03641203222242	6.19720416654336	1.58282871388575	3.9152715086458	9.03025295585429e-05	0.00302225127511821	0	53.5	standard ATAC-Seq in frozen liver
peak_61135	chr5	42567727	42568008	281	7.03641203222242	6.19720416654336	1.58282871388575	3.9152715086458	9.03025295585429e-05	0.00302225127511821	0	53.5	standard ATAC-Seq in frozen liver
peak_65835	chr6	23113871	23114203	332	12.3006836494318	3.43337061423382	0.878920795615157	3.90634813894783	9.37014853235031e-05	0.00312168263952328	6	102.5	standard ATAC-Seq in frozen liver
peak_17029	chr12	32584915	32585122	207	7.03501475274422	6.19698917165315	1.58646427484344	3.90616370624841	9.37729948661414e-05	0.00312287623199765	0	40	standard ATAC-Seq in frozen liver
peak_51775	chr3	87228921	87229254	333	11.7858731908795	4.43318105381965	1.13521353336088	3.9051516948489	9.416629719935e-05	0.00313478134826547	2	102.5	standard ATAC-Seq in frozen liver
peak_34626	chr17	15097644	15099134	1490	12.8064640988373	3.14168634443746	0.804893641029356	3.90323166228478	9.49167728511817e-05	0.00315616301032013	37.5	473	standard ATAC-Seq in frozen liver
peak_11627	chr11	34495184	34495800	616	11.7942568677487	4.43393899612533	1.13766079611651	3.89741741234375	9.72239620532629e-05	0.00322308482384072	5	193	standard ATAC-Seq in frozen liver
peak_6568	chr10	21869671	21869923	252	11.5828939934216	3.78776123263134	0.974448801430091	3.887080806167	0.000101456987385202	0.00332961352573884	4	76	standard ATAC-Seq in frozen liver
peak_25181	chr14	43343822	43344106	284	6.80796641820318	6.14922265036073	1.58203101729817	3.88691661738878	0.000101525608569908	0.00332961352573884	0	53	standard ATAC-Seq in frozen liver
peak_55985	chr4	60924185	60924510	325	6.80796641820318	6.14922265036073	1.58203101729817	3.88691661738878	0.000101525608569908	0.00332961352573884	0	63	standard ATAC-Seq in frozen liver
peak_59453	chr4	147168303	147168590	287	6.80796641820318	6.14922265036073	1.58203101729817	3.88691661738878	0.000101525608569908	0.00332961352573884	0	54	standard ATAC-Seq in frozen liver
peak_72027	chr7	48435738	48435989	251	6.80796641820318	6.14922265036073	1.58203101729817	3.88691661738878	0.000101525608569908	0.00332961352573884	0	47.5	standard ATAC-Seq in frozen liver
peak_85286	chrUn_random	5341136	5341440	304	6.80796641820318	6.14922265036073	1.58203101729817	3.88691661738878	0.000101525608569908	0.00332961352573884	0	56.5	standard ATAC-Seq in frozen liver
peak_2136	chr1	88973663	88974139	476	6.80656913872497	6.14901269664813	1.58202869669896	3.88678960721671	0.000101578721348767	0.00332961352573884	0	90.5	standard ATAC-Seq in frozen liver
peak_19610	chr12	113535411	113536014	603	6.80656913872497	6.14901269664813	1.58202869669896	3.88678960721671	0.000101578721348767	0.00332961352573884	0	115.5	standard ATAC-Seq in frozen liver
peak_22315	chr13	66553352	66553612	260	6.80656913872497	6.14901269664813	1.58202869669896	3.88678960721671	0.000101578721348767	0.00332961352573884	0	49	standard ATAC-Seq in frozen liver
peak_22350	chr13	66900427	66900711	284	6.80656913872497	6.14901269664813	1.58202869669896	3.88678960721671	0.000101578721348767	0.00332961352573884	0	54	standard ATAC-Seq in frozen liver
peak_34291	chr17	5893032	5893618	586	6.80656913872497	6.14901269664813	1.58202869669896	3.88678960721671	0.000101578721348767	0.00332961352573884	0	110.5	standard ATAC-Seq in frozen liver
peak_43219	chr1_random	778841	779102	261	6.80656913872497	6.14901269664813	1.58202869669896	3.88678960721671	0.000101578721348767	0.00332961352573884	0	49	standard ATAC-Seq in frozen liver
peak_49802	chr3	3124032	3124393	361	6.80656913872497	6.14901269664813	1.58202869669896	3.88678960721671	0.000101578721348767	0.00332961352573884	0	67	standard ATAC-Seq in frozen liver
peak_56006	chr4	61227861	61228285	424	6.80656913872497	6.14901269664813	1.58202869669896	3.88678960721671	0.000101578721348767	0.00332961352573884	2	79.5	standard ATAC-Seq in frozen liver
peak_64514	chr5	137632907	137633284	377	6.80656913872497	6.14901269664813	1.58202869669896	3.88678960721671	0.000101578721348767	0.00332961352573884	0	69.5	standard ATAC-Seq in frozen liver
peak_87497	chrX	166612640	166613056	416	6.80656913872497	6.14901269664813	1.58202869669896	3.88678960721671	0.000101578721348767	0.00332961352573884	0	77.5	standard ATAC-Seq in frozen liver
peak_19764	chr12	116489816	116490164	348	6.80936369768139	6.1494332680555	1.58284849719839	3.88504223805366	0.000102312099190182	0.00333615969039699	0	66.5	standard ATAC-Seq in frozen liver
peak_19775	chr12	116602121	116602321	200	6.80936369768139	6.1494332680555	1.58284849719839	3.88504223805366	0.000102312099190182	0.00333615969039699	0	37.5	standard ATAC-Seq in frozen liver
peak_19806	chr12	116805181	116805919	738	6.80936369768139	6.1494332680555	1.58284849719839	3.88504223805366	0.000102312099190182	0.00333615969039699	1	143	standard ATAC-Seq in frozen liver
peak_22264	chr13	65750609	65750934	325	6.80936369768139	6.1494332680555	1.58284849719839	3.88504223805366	0.000102312099190182	0.00333615969039699	0	61.5	standard ATAC-Seq in frozen liver
peak_34152	chr17	3005150	3005410	260	6.80936369768139	6.1494332680555	1.58284849719839	3.88504223805366	0.000102312099190182	0.00333615969039699	0	49	standard ATAC-Seq in frozen liver
peak_49588	chr2	175868089	175868647	558	6.80936369768139	6.1494332680555	1.58284849719839	3.88504223805366	0.000102312099190182	0.00333615969039699	0	105.5	standard ATAC-Seq in frozen liver
peak_64724	chr5	140457953	140458532	579	6.80936369768139	6.1494332680555	1.58284849719839	3.88504223805366	0.000102312099190182	0.00333615969039699	1	110.5	standard ATAC-Seq in frozen liver
peak_68893	chr6	114579280	114579483	203	6.80936369768139	6.1494332680555	1.58284849719839	3.88504223805366	0.000102312099190182	0.00333615969039699	0	38	standard ATAC-Seq in frozen liver
peak_80553	chr8_random	745902	746244	342	6.80936369768139	6.1494332680555	1.58284849719839	3.88504223805366	0.000102312099190182	0.00333615969039699	0	65	standard ATAC-Seq in frozen liver
peak_85772	chrX	31310882	31311108	226	6.80936369768139	6.1494332680555	1.58284849719839	3.88504223805366	0.000102312099190182	0.00333615969039699	0	42.5	standard ATAC-Seq in frozen liver
peak_27377	chr14	125067537	125067745	208	6.80517185924677	6.14880206518042	1.58284178569378	3.88465993301113	0.000102473219099215	0.00333644109462208	0	39.5	standard ATAC-Seq in frozen liver
peak_59449	chr4	147113001	147113239	238	6.80517185924677	6.14880206518042	1.58284178569378	3.88465993301113	0.000102473219099215	0.00333644109462208	0	45	standard ATAC-Seq in frozen liver
peak_85328	chrX	3231683	3231961	278	6.80517185924677	6.14880206518042	1.58284178569378	3.88465993301113	0.000102473219099215	0.00333644109462208	0	51.5	standard ATAC-Seq in frozen liver
peak_87491	chrX	166505128	166505534	406	6.80517185924677	6.14880206518042	1.58284178569378	3.88465993301113	0.000102473219099215	0.00333644109462208	0	76.5	standard ATAC-Seq in frozen liver
peak_19804	chr12	116803995	116804195	200	6.81076097715959	6.14964588879526	1.58449622615209	3.88113634308206	0.000103969529835607	0.0033694803919376	0	37.5	standard ATAC-Seq in frozen liver
peak_22349	chr13	66898478	66898967	489	6.81076097715959	6.14964588879526	1.58449622615209	3.88113634308206	0.000103969529835607	0.0033694803919376	1	93.5	standard ATAC-Seq in frozen liver
peak_27023	chr14	110075299	110075553	254	6.81076097715959	6.14964588879526	1.58449622615209	3.88113634308206	0.000103969529835607	0.0033694803919376	0	48	standard ATAC-Seq in frozen liver
peak_35956	chr17	43029185	43029392	207	6.81076097715959	6.14964588879526	1.58449622615209	3.88113634308206	0.000103969529835607	0.0033694803919376	0	39.5	standard ATAC-Seq in frozen liver
peak_53328	chr3	122508161	122508710	549	6.81076097715959	6.14964588879526	1.58449622615209	3.88113634308206	0.000103969529835607	0.0033694803919376	0	104.5	standard ATAC-Seq in frozen liver
peak_68865	chr6	114466543	114466827	284	6.81076097715959	6.14964588879526	1.58449622615209	3.88113634308206	0.000103969529835607	0.0033694803919376	0	55.5	standard ATAC-Seq in frozen liver
peak_71961	chr7	46441728	46441944	216	6.81076097715959	6.14964588879526	1.58449622615209	3.88113634308206	0.000103969529835607	0.0033694803919376	0	40.5	standard ATAC-Seq in frozen liver
peak_85342	chrX	4229590	4229900	310	6.81076097715959	6.14964588879526	1.58449622615209	3.88113634308206	0.000103969529835607	0.0033694803919376	0	58	standard ATAC-Seq in frozen liver
peak_55934	chr4	60162043	60162646	603	15.283503268603	5.84822884361082	1.5068561464556	3.88107972839142	0.000103993739033502	0.0033694803919376	3.5	249	standard ATAC-Seq in frozen liver
peak_2003	chr1	85007776	85008027	251	6.80377457976856	6.14858941575022	1.58448588050551	3.88049492355753	0.000104244120886927	0.00337027750864534	0	47.5	standard ATAC-Seq in frozen liver
peak_2038	chr1	87513934	87514208	274	6.80377457976856	6.14858941575022	1.58448588050551	3.88049492355753	0.000104244120886927	0.00337027750864534	0	51	standard ATAC-Seq in frozen liver
peak_23769	chr13	114513906	114514130	224	6.80377457976856	6.14858941575022	1.58448588050551	3.88049492355753	0.000104244120886927	0.00337027750864534	0	41.5	standard ATAC-Seq in frozen liver
peak_67563	chr6	79768137	79768481	344	6.80377457976856	6.14858941575022	1.58448588050551	3.88049492355753	0.000104244120886927	0.00337027750864534	0	63.5	standard ATAC-Seq in frozen liver
peak_2026	chr1	87403002	87403338	336	6.8121582566378	6.14986178858835	1.58700581525808	3.8751350054683	0.000106565601025729	0.00341380484486485	0	63.5	standard ATAC-Seq in frozen liver
peak_10704	chr11	3015279	3015505	226	6.8121582566378	6.14986178858835	1.58700581525808	3.8751350054683	0.000106565601025729	0.00341380484486485	0	43	standard ATAC-Seq in frozen liver
peak_50438	chr3	33869017	33869368	351	6.8121582566378	6.14986178858835	1.58700581525808	3.8751350054683	0.000106565601025729	0.00341380484486485	0	66.5	standard ATAC-Seq in frozen liver
peak_59384	chr4	145684126	145684383	257	6.8121582566378	6.14986178858835	1.58700581525808	3.8751350054683	0.000106565601025729	0.00341380484486485	0	48.5	standard ATAC-Seq in frozen liver
peak_68888	chr6	114554364	114554595	231	6.8121582566378	6.14986178858835	1.58700581525808	3.8751350054683	0.000106565601025729	0.00341380484486485	0	44	standard ATAC-Seq in frozen liver
peak_80516	chr8_random	86267	86494	227	6.8121582566378	6.14986178858835	1.58700581525808	3.8751350054683	0.000106565601025729	0.00341380484486485	0	42.5	standard ATAC-Seq in frozen liver
peak_85234	chrUn_random	4322986	4323208	222	6.8121582566378	6.14986178858835	1.58700581525808	3.8751350054683	0.000106565601025729	0.00341380484486485	0	42	standard ATAC-Seq in frozen liver
peak_50532	chr3	37380277	37380711	434	6.80237730029035	6.14837345657572	1.58699310853172	3.87422820144706	0.000106963147560373	0.00342528639273189	2	82.5	standard ATAC-Seq in frozen liver
peak_2034	chr1	87478228	87478486	258	11.5504411794692	4.40273784143996	1.13753772452188	3.8704104018093	0.000108652285466974	0.00347429279202925	4	78	standard ATAC-Seq in frozen liver
peak_84269	chr9	107432120	107432400	280	11.5588248563384	4.40350976693452	1.13885872542363	3.86659878756825	0.00011036377021142	0.00351873471953854	3	86.5	standard ATAC-Seq in frozen liver
peak_43222	chr1_random	838116	838381	265	6.80098002081214	6.14815289693218	1.59042877753185	3.86572035402512	0.000110761793181735	0.00352885379594912	0	48	standard ATAC-Seq in frozen liver
peak_77697	chr8	72110258	72110517	259	6.80098002081214	6.14815289693218	1.59042877753185	3.86572035402512	0.000110761793181735	0.00352885379594912	0	47.5	standard ATAC-Seq in frozen liver
peak_53176	chr3	120952634	120953012	378	13.0289896486199	3.16899746698768	0.821983203895898	3.85530683834876	0.000115584564284312	0.00366909567683943	12.5	121	standard ATAC-Seq in frozen liver
peak_2016	chr1	85245549	85245778	229	11.5616194152948	4.40377563670218	1.14260085817673	3.85416797579637	0.00011612385226693	0.00367959573734592	2	70	standard ATAC-Seq in frozen liver
peak_85224	chrUn_random	4252405	4252757	352	14.8129701921063	5.80277982025606	1.50890456894319	3.84569040328392	0.000120213472375122	0.0037845190247476	2	142.5	standard ATAC-Seq in frozen liver
peak_19769	chr12	116546606	116546806	200	6.5725344067929	6.09849162128006	1.58800879537149	3.8403386927422	0.00012286468249971	0.00383591598856106	0	36.5	standard ATAC-Seq in frozen liver
peak_19782	chr12	116633937	116634234	297	6.5725344067929	6.09849162128006	1.58800879537149	3.8403386927422	0.00012286468249971	0.00383591598856106	0	54	standard ATAC-Seq in frozen liver
peak_22320	chr13	66591587	66591949	362	6.5725344067929	6.09849162128006	1.58800879537149	3.8403386927422	0.00012286468249971	0.00383591598856106	0	65	standard ATAC-Seq in frozen liver
peak_25158	chr14	42381193	42381440	247	6.5725344067929	6.09849162128006	1.58800879537149	3.8403386927422	0.00012286468249971	0.00383591598856106	0	45.5	standard ATAC-Seq in frozen liver
peak_48454	chr2	154853096	154853315	219	6.5725344067929	6.09849162128006	1.58800879537149	3.8403386927422	0.00012286468249971	0.00383591598856106	0	39.5	standard ATAC-Seq in frozen liver
peak_59378	chr4	145426868	145427330	462	6.5725344067929	6.09849162128006	1.58800879537149	3.8403386927422	0.00012286468249971	0.00383591598856106	0	83.5	standard ATAC-Seq in frozen liver
peak_68349	chr6	94991172	94991630	458	6.5725344067929	6.09849162128006	1.58800879537149	3.8403386927422	0.00012286468249971	0.00383591598856106	1	84	standard ATAC-Seq in frozen liver
peak_77681	chr8	71970005	71970245	240	6.5725344067929	6.09849162128006	1.58800879537149	3.8403386927422	0.00012286468249971	0.00383591598856106	0	43.5	standard ATAC-Seq in frozen liver
peak_83523	chr9	83582053	83582314	261	6.5725344067929	6.09849162128006	1.58800879537149	3.8403386927422	0.00012286468249971	0.00383591598856106	0	46	standard ATAC-Seq in frozen liver
peak_85204	chrUn_random	3927738	3928464	726	6.5725344067929	6.09849162128006	1.58800879537149	3.8403386927422	0.00012286468249971	0.00383591598856106	0	134.5	standard ATAC-Seq in frozen liver
peak_17426	chr12	54031745	54032127	382	6.57393168627111	6.09870998149876	1.58844564174976	3.8394200098536	0.000123325300328716	0.00383591598856106	1	68.5	standard ATAC-Seq in frozen liver
peak_19801	chr12	116790514	116790981	467	6.57393168627111	6.09870998149876	1.58844564174976	3.8394200098536	0.000123325300328716	0.00383591598856106	1	86	standard ATAC-Seq in frozen liver
peak_23928	chr13_random	215264	215554	290	6.57393168627111	6.09870998149876	1.58844564174976	3.8394200098536	0.000123325300328716	0.00383591598856106	0	52.5	standard ATAC-Seq in frozen liver
peak_43221	chr1_random	786825	787106	281	6.57393168627111	6.09870998149876	1.58844564174976	3.8394200098536	0.000123325300328716	0.00383591598856106	0	51	standard ATAC-Seq in frozen liver
peak_49431	chr2	170330070	170330376	306	6.57393168627111	6.09870998149876	1.58844564174976	3.8394200098536	0.000123325300328716	0.00383591598856106	0	56.5	standard ATAC-Seq in frozen liver
peak_68870	chr6	114493105	114493604	499	6.57393168627111	6.09870998149876	1.58844564174976	3.8394200098536	0.000123325300328716	0.00383591598856106	0	91.5	standard ATAC-Seq in frozen liver
peak_78014	chr8	76142889	76143250	361	6.57393168627111	6.09870998149876	1.58844564174976	3.8394200098536	0.000123325300328716	0.00383591598856106	0	66	standard ATAC-Seq in frozen liver
peak_80515	chr8_random	59406	59606	200	6.57393168627111	6.09870998149876	1.58844564174976	3.8394200098536	0.000123325300328716	0.00383591598856106	0	36.5	standard ATAC-Seq in frozen liver
peak_2137	chr1	88974862	88975202	340	6.57113712731469	6.09827324752989	1.58844917559856	3.83913652461177	0.000123467765168438	0.00383591598856106	0	62	standard ATAC-Seq in frozen liver
peak_17487	chr12	56300231	56300967	736	6.57113712731469	6.09827324752989	1.58844917559856	3.83913652461177	0.000123467765168438	0.00383591598856106	0	135	standard ATAC-Seq in frozen liver
peak_22318	chr13	66573967	66574232	265	6.57113712731469	6.09827324752989	1.58844917559856	3.83913652461177	0.000123467765168438	0.00383591598856106	0	49	standard ATAC-Seq in frozen liver
peak_23919	chr13_random	106341	106624	283	6.57113712731469	6.09827324752989	1.58844917559856	3.83913652461177	0.000123467765168438	0.00383591598856106	0	50	standard ATAC-Seq in frozen liver
peak_59386	chr4	145723041	145723390	349	6.57113712731469	6.09827324752989	1.58844917559856	3.83913652461177	0.000123467765168438	0.00383591598856106	0	63.5	standard ATAC-Seq in frozen liver
peak_68867	chr6	114478201	114478928	727	6.57113712731469	6.09827324752989	1.58844917559856	3.83913652461177	0.000123467765168438	0.00383591598856106	0	131	standard ATAC-Seq in frozen liver
peak_68868	chr6	114480690	114481012	322	6.57113712731469	6.09827324752989	1.58844917559856	3.83913652461177	0.000123467765168438	0.00383591598856106	0	57.5	standard ATAC-Seq in frozen liver
peak_68871	chr6	114496203	114496412	209	6.57113712731469	6.09827324752989	1.58844917559856	3.83913652461177	0.000123467765168438	0.00383591598856106	0	38.5	standard ATAC-Seq in frozen liver
peak_74108	chr7	113102312	113102696	384	6.57113712731469	6.09827324752989	1.58844917559856	3.83913652461177	0.000123467765168438	0.00383591598856106	0	69.5	standard ATAC-Seq in frozen liver
peak_77290	chr8	48173078	48173281	203	6.57113712731469	6.09827324752989	1.58844917559856	3.83913652461177	0.000123467765168438	0.00383591598856106	0	37	standard ATAC-Seq in frozen liver
peak_85178	chrUn_random	3640349	3640786	437	6.57113712731469	6.09827324752989	1.58844917559856	3.83913652461177	0.000123467765168438	0.00383591598856106	0	78	standard ATAC-Seq in frozen liver
peak_60235	chr5	15006528	15007190	662	11.3219955654499	4.37229330637678	1.13909191348368	3.83840255085739	0.000123837343135015	0.00384466847599625	8	201	standard ATAC-Seq in frozen liver
peak_71955	chr7	39326587	39326922	335	11.3219955654499	4.37229330637678	1.13909191348368	3.83840255085739	0.000123837343135015	0.00384466847599625	2	100.5	standard ATAC-Seq in frozen liver
peak_17486	chr12	56268033	56268340	307	6.57532896574932	6.09892975673175	1.58976807981773	3.83636445728047	0.000124869060824612	0.00385696762555225	0	55	standard ATAC-Seq in frozen liver
peak_22317	chr13	66561067	66561312	245	6.57532896574932	6.09892975673175	1.58976807981773	3.83636445728047	0.000124869060824612	0.00385696762555225	0	44	standard ATAC-Seq in frozen liver
peak_25154	chr14	42283112	42283430	318	6.57532896574932	6.09892975673175	1.58976807981773	3.83636445728047	0.000124869060824612	0.00385696762555225	0	58	standard ATAC-Seq in frozen liver
peak_25195	chr14	43678943	43679403	460	6.57532896574932	6.09892975673175	1.58976807981773	3.83636445728047	0.000124869060824612	0.00385696762555225	0	83.5	standard ATAC-Seq in frozen liver
peak_35802	chr17	35530697	35530960	263	6.57532896574932	6.09892975673175	1.58976807981773	3.83636445728047	0.000124869060824612	0.00385696762555225	0	47.5	standard ATAC-Seq in frozen liver
peak_49585	chr2	175032149	175032700	551	6.57532896574932	6.09892975673175	1.58976807981773	3.83636445728047	0.000124869060824612	0.00385696762555225	0	101.5	standard ATAC-Seq in frozen liver
peak_55068	chr4	39130357	39130633	276	6.57532896574932	6.09892975673175	1.58976807981773	3.83636445728047	0.000124869060824612	0.00385696762555225	0	51.5	standard ATAC-Seq in frozen liver
peak_59447	chr4	147024351	147024600	249	6.57532896574932	6.09892975673175	1.58976807981773	3.83636445728047	0.000124869060824612	0.00385696762555225	0	45	standard ATAC-Seq in frozen liver
peak_63032	chr5	109332321	109332896	575	6.57532896574932	6.09892975673175	1.58976807981773	3.83636445728047	0.000124869060824612	0.00385696762555225	0	103	standard ATAC-Seq in frozen liver
peak_85125	chrUn_random	2372771	2373209	438	6.57532896574932	6.09892975673175	1.58976807981773	3.83636445728047	0.000124869060824612	0.00385696762555225	0	80.5	standard ATAC-Seq in frozen liver
peak_85132	chrUn_random	2406141	2406451	310	6.57532896574932	6.09892975673175	1.58976807981773	3.83636445728047	0.000124869060824612	0.00385696762555225	0	56.5	standard ATAC-Seq in frozen liver
peak_85223	chrUn_random	4249115	4249494	379	6.57532896574932	6.09892975673175	1.58976807981773	3.83636445728047	0.000124869060824612	0.00385696762555225	1	70.5	standard ATAC-Seq in frozen liver
peak_22251	chr13	65592655	65593117	462	6.56973984783649	6.09805343243136	1.58977579552034	3.8357946130608	0.000125158971841182	0.00385696762555225	0	81.5	standard ATAC-Seq in frozen liver
peak_22346	chr13	66843891	66844108	217	6.56973984783649	6.09805343243136	1.58977579552034	3.8357946130608	0.000125158971841182	0.00385696762555225	0	39	standard ATAC-Seq in frozen liver
peak_63340	chr5	115343019	115343279	260	6.56973984783649	6.09805343243136	1.58977579552034	3.8357946130608	0.000125158971841182	0.00385696762555225	0	48	standard ATAC-Seq in frozen liver
peak_68883	chr6	114537232	114537437	205	6.56973984783649	6.09805343243136	1.58977579552034	3.8357946130608	0.000125158971841182	0.00385696762555225	0	36.5	standard ATAC-Seq in frozen liver
peak_69423	chr6	123528138	123528471	333	6.56973984783649	6.09805343243136	1.58977579552034	3.8357946130608	0.000125158971841182	0.00385696762555225	0	60	standard ATAC-Seq in frozen liver
peak_85367	chrX	4800179	4800499	320	6.56973984783649	6.09805343243136	1.58977579552034	3.8357946130608	0.000125158971841182	0.00385696762555225	0	58.5	standard ATAC-Seq in frozen liver
peak_34629	chr17	15124613	15125004	391	12.5699657542727	3.11254363261034	0.811762158953408	3.83430491096467	0.000125919865263663	0.00387632102990171	11	123.5	standard ATAC-Seq in frozen liver
peak_65834	chr6	23112740	23113205	465	11.3527201536003	3.7556552661532	0.979546633916535	3.83407500583909	0.000126037681296519	0.00387858362496135	7	137	standard ATAC-Seq in frozen liver
peak_163	chr1	13258507	13258738	231	6.57672624522752	6.09915238289302	1.59200256140998	3.8311197046638	0.000127561421892703	0.00391583587605313	1	42.5	standard ATAC-Seq in frozen liver
peak_19829	chr12	117030942	117031142	200	6.57672624522752	6.09915238289302	1.59200256140998	3.8311197046638	0.000127561421892703	0.00391583587605313	0	36.5	standard ATAC-Seq in frozen liver
peak_59363	chr4	145136019	145136219	200	6.57672624522752	6.09915238289302	1.59200256140998	3.8311197046638	0.000127561421892703	0.00391583587605313	0	36.5	standard ATAC-Seq in frozen liver
peak_59434	chr4	146811246	146811570	324	6.57672624522752	6.09915238289302	1.59200256140998	3.8311197046638	0.000127561421892703	0.00391583587605313	0	60.5	standard ATAC-Seq in frozen liver
peak_72679	chr7	73884749	73884949	200	6.57672624522752	6.09915238289302	1.59200256140998	3.8311197046638	0.000127561421892703	0.00391583587605313	0	37.5	standard ATAC-Seq in frozen liver
peak_68896	chr6	114596245	114596651	406	6.56834256835828	6.0978307553523	1.59201576564237	3.8302577693958	0.000128009091923369	0.00392544769307685	0	71	standard ATAC-Seq in frozen liver
peak_80512	chr8_random	20116	20316	200	6.56834256835828	6.0978307553523	1.59201576564237	3.8302577693958	0.000128009091923369	0.00392544769307685	0	36.5	standard ATAC-Seq in frozen liver
peak_85210	chrUn_random	4062755	4064499	1744	14.5817300191307	5.77957581527033	1.51058071842961	3.82606221882584	0.000130209392653905	0.00397759016952081	11	690	standard ATAC-Seq in frozen liver
peak_19839	chr12	117090791	117091027	236	6.57812352470573	6.09937906280804	1.59517554854044	3.82364127157596	0.000131495192158622	0.00400987028659596	0	43	standard ATAC-Seq in frozen liver
peak_25162	chr14	42547581	42547781	200	6.57812352470573	6.09937906280804	1.59517554854044	3.82364127157596	0.000131495192158622	0.00400987028659596	0	37	standard ATAC-Seq in frozen liver
peak_59436	chr4	146826652	146827217	565	6.57812352470573	6.09937906280804	1.59517554854044	3.82364127157596	0.000131495192158622	0.00400987028659596	1	106	standard ATAC-Seq in frozen liver
peak_62173	chr5	88596709	88596956	247	6.57812352470573	6.09937906280804	1.59517554854044	3.82364127157596	0.000131495192158622	0.00400987028659596	0	45.5	standard ATAC-Seq in frozen liver
peak_85365	chrX	4783237	4783568	331	6.57812352470573	6.09937906280804	1.59517554854044	3.82364127157596	0.000131495192158622	0.00400987028659596	0	61	standard ATAC-Seq in frozen liver
peak_28193	chr15	38238192	38238445	253	6.56694528888007	6.09760394374172	1.59519001865517	3.82249379223318	0.000132108805465526	0.00402437540742685	0	45.5	standard ATAC-Seq in frozen liver
peak_56025	chr4	61379520	61379893	373	6.56694528888007	6.09760394374172	1.59519001865517	3.82249379223318	0.000132108805465526	0.00402437540742685	0	66.5	standard ATAC-Seq in frozen liver
peak_77464	chr8	60050312	60050671	359	6.56694528888007	6.09760394374172	1.59519001865517	3.82249379223318	0.000132108805465526	0.00402437540742685	1	63.5	standard ATAC-Seq in frozen liver
peak_80517	chr8_random	96745	96951	206	6.57952080418394	6.09961123757686	1.59939050679384	3.81370979236598	0.000136896211846559	0.00415142743056098	0	39	standard ATAC-Seq in frozen liver
peak_23916	chr13_random	31128	32471	1343	11.082371715605	4.34012297742588	1.14063666423651	3.80500041205581	0.000141803954653584	0.00428245007154142	12	396.5	standard ATAC-Seq in frozen liver
peak_86879	chrX	125590956	125591336	380	11.082371715605	4.34012297742588	1.14063666423651	3.80500041205581	0.000141803954653584	0.00428245007154142	5	112	standard ATAC-Seq in frozen liver
peak_85335	chrX	3846590	3846934	344	12.3314082375821	3.08107713076499	0.81082957435595	3.79990719160968	0.000144750287655458	0.00434444459030111	9	104	standard ATAC-Seq in frozen liver
peak_2025	chr1	87375935	87376151	216	6.33849967486083	6.04613790040871	1.59528551820085	3.79000362720494	0.000150645084950839	0.00446608673729449	0	38	standard ATAC-Seq in frozen liver
peak_15339	chr11	108263907	108264365	458	6.33849967486083	6.04613790040871	1.59528551820085	3.79000362720494	0.000150645084950839	0.00446608673729449	0	81	standard ATAC-Seq in frozen liver
peak_19334	chr12	107751394	107751883	489	6.33849967486083	6.04613790040871	1.59528551820085	3.79000362720494	0.000150645084950839	0.00446608673729449	0	83.5	standard ATAC-Seq in frozen liver
peak_19833	chr12	117070575	117070914	339	6.33849967486083	6.04613790040871	1.59528551820085	3.79000362720494	0.000150645084950839	0.00446608673729449	0	59.5	standard ATAC-Seq in frozen liver
peak_22347	chr13	66846973	66847173	200	6.33849967486083	6.04613790040871	1.59528551820085	3.79000362720494	0.000150645084950839	0.00446608673729449	0	35	standard ATAC-Seq in frozen liver
peak_25228	chr14	44588142	44588588	446	6.33849967486083	6.04613790040871	1.59528551820085	3.79000362720494	0.000150645084950839	0.00446608673729449	0	79	standard ATAC-Seq in frozen liver
peak_43860	chr2	22868027	22868227	200	6.33849967486083	6.04613790040871	1.59528551820085	3.79000362720494	0.000150645084950839	0.00446608673729449	0	36	standard ATAC-Seq in frozen liver
peak_54031	chr3	145764035	145764558	523	6.33849967486083	6.04613790040871	1.59528551820085	3.79000362720494	0.000150645084950839	0.00446608673729449	0	89.5	standard ATAC-Seq in frozen liver
peak_69415	chr6	123374355	123374813	458	6.33849967486083	6.04613790040871	1.59528551820085	3.79000362720494	0.000150645084950839	0.00446608673729449	0	81.5	standard ATAC-Seq in frozen liver
peak_75069	chr7	135449357	135449559	202	6.33849967486083	6.04613790040871	1.59528551820085	3.79000362720494	0.000150645084950839	0.00446608673729449	0	36	standard ATAC-Seq in frozen liver
peak_77677	chr8	71942739	71942995	256	6.33849967486083	6.04613790040871	1.59528551820085	3.79000362720494	0.000150645084950839	0.00446608673729449	0	45.5	standard ATAC-Seq in frozen liver
peak_87130	chrX	140709894	140710301	407	6.33849967486083	6.04613790040871	1.59528551820085	3.79000362720494	0.000150645084950839	0.00446608673729449	0	71.5	standard ATAC-Seq in frozen liver
peak_2030	chr1	87446245	87446559	314	6.33710239538262	6.04591052670363	1.59529301550195	3.78984328769304	0.000150742355625269	0.00446608673729449	0	54.5	standard ATAC-Seq in frozen liver
peak_2728	chr1	111028804	111029004	200	6.33710239538262	6.04591052670363	1.59529301550195	3.78984328769304	0.000150742355625269	0.00446608673729449	0.5	34.5	standard ATAC-Seq in frozen liver
peak_22287	chr13	66051280	66051633	353	6.33710239538262	6.04591052670363	1.59529301550195	3.78984328769304	0.000150742355625269	0.00446608673729449	0	62	standard ATAC-Seq in frozen liver
peak_56014	chr4	61273316	61273643	327	6.33710239538262	6.04591052670363	1.59529301550195	3.78984328769304	0.000150742355625269	0.00446608673729449	0.5	57	standard ATAC-Seq in frozen liver
peak_57303	chr4	107819061	107819340	279	6.33710239538262	6.04591052670363	1.59529301550195	3.78984328769304	0.000150742355625269	0.00446608673729449	0	49	standard ATAC-Seq in frozen liver
peak_78851	chr8	98041367	98042206	839	6.33710239538262	6.04591052670363	1.59529301550195	3.78984328769304	0.000150742355625269	0.00446608673729449	0	150.5	standard ATAC-Seq in frozen liver
peak_85153	chrUn_random	2521853	2522263	410	6.33710239538262	6.04591052670363	1.59529301550195	3.78984328769304	0.000150742355625269	0.00446608673729449	0	72	standard ATAC-Seq in frozen liver
peak_85173	chrUn_random	3567545	3567896	351	6.33710239538262	6.04591052670363	1.59529301550195	3.78984328769304	0.000150742355625269	0.00446608673729449	0	61	standard ATAC-Seq in frozen liver
peak_22343	chr13	66827288	66827574	286	6.33989695433904	6.0463660113771	1.59623129534617	3.78790093202992	0.000151925400585038	0.00448746511434423	0	49.5	standard ATAC-Seq in frozen liver
peak_22345	chr13	66836603	66836807	204	6.33989695433904	6.0463660113771	1.59623129534617	3.78790093202992	0.000151925400585038	0.00448746511434423	0	36	standard ATAC-Seq in frozen liver
peak_23199	chr13	101363575	101364040	465	6.33989695433904	6.0463660113771	1.59623129534617	3.78790093202992	0.000151925400585038	0.00448746511434423	0	82.5	standard ATAC-Seq in frozen liver
peak_23967	chr14	7378293	7378608	315	6.33989695433904	6.0463660113771	1.59623129534617	3.78790093202992	0.000151925400585038	0.00448746511434423	0	54.5	standard ATAC-Seq in frozen liver
peak_53292	chr3	122011260	122011513	253	6.33989695433904	6.0463660113771	1.59623129534617	3.78790093202992	0.000151925400585038	0.00448746511434423	0	45	standard ATAC-Seq in frozen liver
peak_68889	chr6	114558814	114559120	306	6.33989695433904	6.0463660113771	1.59623129534617	3.78790093202992	0.000151925400585038	0.00448746511434423	0	55.5	standard ATAC-Seq in frozen liver
peak_85144	chrUn_random	2446580	2446817	237	6.33989695433904	6.0463660113771	1.59623129534617	3.78790093202992	0.000151925400585038	0.00448746511434423	0	41.5	standard ATAC-Seq in frozen liver
peak_87494	chrX	166578770	166579267	497	6.33989695433904	6.0463660113771	1.59623129534617	3.78790093202992	0.000151925400585038	0.00448746511434423	0	90.5	standard ATAC-Seq in frozen liver
peak_5301	chr1	184559825	184560185	360	6.33570511590442	6.04568237209079	1.59625421123825	3.78741827556467	0.000152220728574471	0.00449012670849649	0	63.5	standard ATAC-Seq in frozen liver
peak_6822	chr10	29535701	29536021	320	6.33570511590442	6.04568237209079	1.59625421123825	3.78741827556467	0.000152220728574471	0.00449012670849649	0	55	standard ATAC-Seq in frozen liver
peak_17483	chr12	56225196	56225932	736	6.33570511590442	6.04568237209079	1.59625421123825	3.78741827556467	0.000152220728574471	0.00449012670849649	0	128	standard ATAC-Seq in frozen liver
peak_71911	chr7	38661708	38662046	338	6.33570511590442	6.04568237209079	1.59625421123825	3.78741827556467	0.000152220728574471	0.00449012670849649	0	58	standard ATAC-Seq in frozen liver
peak_1997	chr1	84959304	84959705	401	6.34129423381724	6.046596379141	1.59815012205957	3.78349711687198	0.000154640116720502	0.0045264041388835	0	69.5	standard ATAC-Seq in frozen liver
peak_11888	chr11	48791776	48791988	212	6.34129423381724	6.046596379141	1.59815012205957	3.78349711687198	0.000154640116720502	0.0045264041388835	0	36.5	standard ATAC-Seq in frozen liver
peak_12729	chr11	66234472	66234745	273	6.34129423381724	6.046596379141	1.59815012205957	3.78349711687198	0.000154640116720502	0.0045264041388835	0	48	standard ATAC-Seq in frozen liver
peak_16794	chr12	22811028	22811394	366	6.34129423381724	6.046596379141	1.59815012205957	3.78349711687198	0.000154640116720502	0.0045264041388835	1	65	standard ATAC-Seq in frozen liver
peak_22240	chr13	65483344	65483566	222	6.34129423381724	6.046596379141	1.59815012205957	3.78349711687198	0.000154640116720502	0.0045264041388835	0	39	standard ATAC-Seq in frozen liver
peak_28000	chr15	33766106	33766537	431	6.34129423381724	6.046596379141	1.59815012205957	3.78349711687198	0.000154640116720502	0.0045264041388835	2	76.5	standard ATAC-Seq in frozen liver
peak_34173	chr17	3352911	3353204	293	6.34129423381724	6.046596379141	1.59815012205957	3.78349711687198	0.000154640116720502	0.0045264041388835	0	51.5	standard ATAC-Seq in frozen liver
peak_39341	chr18	56099138	56099382	244	6.34129423381724	6.046596379141	1.59815012205957	3.78349711687198	0.000154640116720502	0.0045264041388835	0	43	standard ATAC-Seq in frozen liver
peak_43234	chr1_random	1046574	1046774	200	6.34129423381724	6.046596379141	1.59815012205957	3.78349711687198	0.000154640116720502	0.0045264041388835	0	35.5	standard ATAC-Seq in frozen liver
peak_44008	chr2	26188778	26189003	225	6.34129423381724	6.046596379141	1.59815012205957	3.78349711687198	0.000154640116720502	0.0045264041388835	0	39	standard ATAC-Seq in frozen liver
peak_59388	chr4	145750729	145751040	311	6.34129423381724	6.046596379141	1.59815012205957	3.78349711687198	0.000154640116720502	0.0045264041388835	0	54.5	standard ATAC-Seq in frozen liver
peak_59389	chr4	145768923	145769172	249	6.34129423381724	6.046596379141	1.59815012205957	3.78349711687198	0.000154640116720502	0.0045264041388835	0	44.5	standard ATAC-Seq in frozen liver
peak_86104	chrX	51595100	51595473	373	6.34129423381724	6.046596379141	1.59815012205957	3.78349711687198	0.000154640116720502	0.0045264041388835	1	67	standard ATAC-Seq in frozen liver
peak_86321	chrX	72109021	72109345	324	6.34129423381724	6.046596379141	1.59815012205957	3.78349711687198	0.000154640116720502	0.0045264041388835	0	56	standard ATAC-Seq in frozen liver
peak_10703	chr11	3014528	3014744	216	6.33430783642621	6.04545191804428	1.59818973493745	3.7826872403738	0.000155144306547901	0.00453358082296018	0	37.5	standard ATAC-Seq in frozen liver
peak_19710	chr12	114573541	114573872	331	6.33430783642621	6.04545191804428	1.59818973493745	3.7826872403738	0.000155144306547901	0.00453358082296018	0	56	standard ATAC-Seq in frozen liver
peak_23931	chr13_random	300260	300559	299	6.33430783642621	6.04545191804428	1.59818973493745	3.7826872403738	0.000155144306547901	0.00453358082296018	0	51.5	standard ATAC-Seq in frozen liver
peak_85783	chrX	31635553	31635892	339	6.33430783642621	6.04545191804428	1.59818973493745	3.7826872403738	0.000155144306547901	0.00453358082296018	0	60.5	standard ATAC-Seq in frozen liver
peak_19734	chr12	116023883	116024101	218	6.34269151329545	6.0468304407188	1.60108386120117	3.77671063162321	0.000158913175657251	0.00461903760224077	0	39.5	standard ATAC-Seq in frozen liver
peak_19803	chr12	116795716	116795931	215	6.34269151329545	6.0468304407188	1.60108386120117	3.77671063162321	0.000158913175657251	0.00461903760224077	0	38.5	standard ATAC-Seq in frozen liver
peak_30988	chr16	3139100	3139326	226	6.34269151329545	6.0468304407188	1.60108386120117	3.77671063162321	0.000158913175657251	0.00461903760224077	0	40.5	standard ATAC-Seq in frozen liver
peak_33242	chr16	63312295	63312589	294	6.34269151329545	6.0468304407188	1.60108386120117	3.77671063162321	0.000158913175657251	0.00461903760224077	0	53.5	standard ATAC-Seq in frozen liver
peak_33527	chr16	85552413	85552708	295	6.34269151329545	6.0468304407188	1.60108386120117	3.77671063162321	0.000158913175657251	0.00461903760224077	0	51	standard ATAC-Seq in frozen liver
peak_85329	chrX	3233081	3233281	200	6.34269151329545	6.0468304407188	1.60108386120117	3.77671063162321	0.000158913175657251	0.00461903760224077	0	35	standard ATAC-Seq in frozen liver
peak_2011	chr1	85161010	85161243	233	6.332910556948	6.04521770574624	1.60114231349831	3.77556551643316	0.000159645055087275	0.00463108239184064	0	40	standard ATAC-Seq in frozen liver
peak_52096	chr3	93609779	93610117	338	6.332910556948	6.04521770574624	1.60114231349831	3.77556551643316	0.000159645055087275	0.00463108239184064	0	59	standard ATAC-Seq in frozen liver
peak_68890	chr6	114561339	114561627	288	6.332910556948	6.04521770574624	1.60114231349831	3.77556551643316	0.000159645055087275	0.00463108239184064	0	50	standard ATAC-Seq in frozen liver
peak_70807	chr7	10461967	10462522	555	6.332910556948	6.04521770574624	1.60114231349831	3.77556551643316	0.000159645055087275	0.00463108239184064	0	95	standard ATAC-Seq in frozen liver
peak_78954	chr8	107391042	107391983	941	6.332910556948	6.04521770574624	1.60114231349831	3.77556551643316	0.000159645055087275	0.00463108239184064	0	162	standard ATAC-Seq in frozen liver
peak_6977	chr10	37540139	37540471	332	10.848336983673	4.30776542712505	1.1424012916239	3.77079880660993	0.000162725829347046	0.00471264125037199	3	93	standard ATAC-Seq in frozen liver
peak_30994	chr16	3235951	3236277	326	13.8712421464652	5.70636208950337	1.51369456586345	3.76982399104294	0.000163362714100601	0.00472648693775896	1	121	standard ATAC-Seq in frozen liver
peak_80568	chr8_random	829637	829924	287	13.8737057590978	5.70608091787714	1.51362195485163	3.76981907509163	0.000163365931817329	0.00472648693775896	1	107	standard ATAC-Seq in frozen liver
peak_71198	chr7	23561035	23561455	420	10.8748697333887	3.6892579353407	0.979564862899714	3.76622118153538	0.000165736979107558	0.00477613917501297	9	119	standard ATAC-Seq in frozen liver
peak_1998	chr1	84960616	84960970	354	6.34548607225186	6.04731519532332	1.61027533484788	3.75545415399075	0.000173027433627513	0.00495685367058798	0	62.5	standard ATAC-Seq in frozen liver
peak_77402	chr8	58044087	58044816	729	12.1054262361955	3.05009802593576	0.812813248576202	3.75252006691401	0.000175065813613153	0.00500214983402205	19	219.5	standard ATAC-Seq in frozen liver
peak_60253	chr5	15136002	15136410	408	13.6410683066439	5.68114624799662	1.51441461380194	3.75138102618681	0.000175863200429232	0.0050183799929462	4	151	standard ATAC-Seq in frozen liver
peak_54378	chr4	3017235	3017488	253	13.6413992529677	5.68164537841523	1.51472429610459	3.75094358295216	0.000176170339812268	0.00502386835126421	1	94	standard ATAC-Seq in frozen liver
peak_75538	chr7	147407127	147407373	246	13.6466574245567	5.68157458706378	1.51574681392046	3.74836650480461	0.000177990031933242	0.00506420988451412	1	90	standard ATAC-Seq in frozen liver
peak_85266	chrUn_random	5186536	5186748	212	13.6455910914024	5.68197640030252	1.51669955069362	3.74627684019819	0.000179478518710925	0.00509827344338249	1	78	standard ATAC-Seq in frozen liver
peak_25219	chr14	44402472	44402713	241	6.10306766345055	5.99157643902204	1.60372615212224	3.73603462853885	0.000186944935438355	0.0052659699402384	0	40	standard ATAC-Seq in frozen liver
peak_34330	chr17	6859824	6860899	1075	6.10306766345055	5.99157643902204	1.60372615212224	3.73603462853885	0.000186944935438355	0.0052659699402384	0	179.5	standard ATAC-Seq in frozen liver
peak_34597	chr17	14188279	14188580	301	6.10306766345055	5.99157643902204	1.60372615212224	3.73603462853885	0.000186944935438355	0.0052659699402384	0	50.5	standard ATAC-Seq in frozen liver
peak_34724	chr17	20030118	20030586	468	6.10306766345055	5.99157643902204	1.60372615212224	3.73603462853885	0.000186944935438355	0.0052659699402384	0	80.5	standard ATAC-Seq in frozen liver
peak_43243	chr1_random	1141297	1141770	473	6.10306766345055	5.99157643902204	1.60372615212224	3.73603462853885	0.000186944935438355	0.0052659699402384	0	78	standard ATAC-Seq in frozen liver
peak_54334	chr3	157315527	157315898	371	6.10306766345055	5.99157643902204	1.60372615212224	3.73603462853885	0.000186944935438355	0.0052659699402384	0	64.5	standard ATAC-Seq in frozen liver
peak_59371	chr4	145221851	145222134	283	6.10306766345055	5.99157643902204	1.60372615212224	3.73603462853885	0.000186944935438355	0.0052659699402384	0	48	standard ATAC-Seq in frozen liver
peak_60302	chr5	16974399	16974965	566	6.10306766345055	5.99157643902204	1.60372615212224	3.73603462853885	0.000186944935438355	0.0052659699402384	1	93	standard ATAC-Seq in frozen liver
peak_85149	chrUn_random	2487002	2487273	271	6.10306766345055	5.99157643902204	1.60372615212224	3.73603462853885	0.000186944935438355	0.0052659699402384	0	44.5	standard ATAC-Seq in frozen liver
peak_2020	chr1	85336266	85336763	497	6.10446494292876	5.99181432239243	1.60423117095732	3.73500679382563	0.000187710119687213	0.0052659699402384	0	84.5	standard ATAC-Seq in frozen liver
peak_10698	chr11	3001685	3001987	302	6.10446494292876	5.99181432239243	1.60423117095732	3.73500679382563	0.000187710119687213	0.0052659699402384	0	52.5	standard ATAC-Seq in frozen liver
peak_22280	chr13	65960833	65961038	205	6.10446494292876	5.99181432239243	1.60423117095732	3.73500679382563	0.000187710119687213	0.0052659699402384	0	35.5	standard ATAC-Seq in frozen liver
peak_27999	chr15	33761360	33761749	389	6.10446494292876	5.99181432239243	1.60423117095732	3.73500679382563	0.000187710119687213	0.0052659699402384	0	67.5	standard ATAC-Seq in frozen liver
peak_54517	chr4	8321688	8321911	223	6.10446494292876	5.99181432239243	1.60423117095732	3.73500679382563	0.000187710119687213	0.0052659699402384	0	37.5	standard ATAC-Seq in frozen liver
peak_70414	chr6	145117430	145117691	261	6.10446494292876	5.99181432239243	1.60423117095732	3.73500679382563	0.000187710119687213	0.0052659699402384	0	44	standard ATAC-Seq in frozen liver
peak_7350	chr10	47175132	47175426	294	6.10167038397234	5.99133852413962	1.60425817677799	3.73464733474054	0.00018797841754046	0.0052659699402384	0	49	standard ATAC-Seq in frozen liver
peak_22236	chr13	65469292	65469492	200	6.10167038397234	5.99133852413962	1.60425817677799	3.73464733474054	0.00018797841754046	0.0052659699402384	0	33	standard ATAC-Seq in frozen liver
peak_24611	chr14	26756666	26757209	543	6.10167038397234	5.99133852413962	1.60425817677799	3.73464733474054	0.00018797841754046	0.0052659699402384	0	93.5	standard ATAC-Seq in frozen liver
peak_28001	chr15	33767811	33768074	263	6.10167038397234	5.99133852413962	1.60425817677799	3.73464733474054	0.00018797841754046	0.0052659699402384	0	44	standard ATAC-Seq in frozen liver
peak_35607	chr17	33426200	33426948	748	6.10167038397234	5.99133852413962	1.60425817677799	3.73464733474054	0.00018797841754046	0.0052659699402384	0	125	standard ATAC-Seq in frozen liver
peak_39132	chr18	47157495	47157919	424	6.10167038397234	5.99133852413962	1.60425817677799	3.73464733474054	0.00018797841754046	0.0052659699402384	0	70	standard ATAC-Seq in frozen liver
peak_43210	chr1_random	481534	481925	391	6.10167038397234	5.99133852413962	1.60425817677799	3.73464733474054	0.00018797841754046	0.0052659699402384	0	63.5	standard ATAC-Seq in frozen liver
peak_43244	chr1_random	1220090	1220374	284	6.10167038397234	5.99133852413962	1.60425817677799	3.73464733474054	0.00018797841754046	0.0052659699402384	0	47.5	standard ATAC-Seq in frozen liver
peak_49584	chr2	174967458	174967796	338	6.10167038397234	5.99133852413962	1.60425817677799	3.73464733474054	0.00018797841754046	0.0052659699402384	0	57	standard ATAC-Seq in frozen liver
peak_51105	chr3	60297413	60298059	646	6.10167038397234	5.99133852413962	1.60425817677799	3.73464733474054	0.00018797841754046	0.0052659699402384	0	107.5	standard ATAC-Seq in frozen liver
peak_55958	chr4	60549840	60550186	346	6.10167038397234	5.99133852413962	1.60425817677799	3.73464733474054	0.00018797841754046	0.0052659699402384	0	59.5	standard ATAC-Seq in frozen liver
peak_55997	chr4	61112291	61112599	308	6.10167038397234	5.99133852413962	1.60425817677799	3.73464733474054	0.00018797841754046	0.0052659699402384	0	53.5	standard ATAC-Seq in frozen liver
peak_70867	chr7	14422576	14423009	433	6.10167038397234	5.99133852413962	1.60425817677799	3.73464733474054	0.00018797841754046	0.0052659699402384	0	73	standard ATAC-Seq in frozen liver
peak_77678	chr8	71943408	71943969	561	6.10167038397234	5.99133852413962	1.60425817677799	3.73464733474054	0.00018797841754046	0.0052659699402384	0	93.5	standard ATAC-Seq in frozen liver
peak_85755	chrX	30287220	30287441	221	6.10167038397234	5.99133852413962	1.60425817677799	3.73464733474054	0.00018797841754046	0.0052659699402384	0	37.5	standard ATAC-Seq in frozen liver
peak_85344	chrX	4253434	4253865	431	13.4045699620793	5.65595076028984	1.51565761254232	3.73168102972988	0.000190206248253323	0.00530100408361256	2	156	standard ATAC-Seq in frozen liver
peak_19777	chr12	116603079	116603438	359	6.10586222240696	5.99205378462837	1.6057842627127	3.7315434730353	0.000190310159287819	0.00530100408361256	0	62.5	standard ATAC-Seq in frozen liver
peak_24621	chr14	27010177	27010464	287	6.10586222240696	5.99205378462837	1.6057842627127	3.7315434730353	0.000190310159287819	0.00530100408361256	0	49.5	standard ATAC-Seq in frozen liver
peak_41094	chr19	11195699	11195951	252	6.10586222240696	5.99205378462837	1.6057842627127	3.7315434730353	0.000190310159287819	0.00530100408361256	0	43	standard ATAC-Seq in frozen liver
peak_43239	chr1_random	1103035	1103877	842	6.10586222240696	5.99205378462837	1.6057842627127	3.7315434730353	0.000190310159287819	0.00530100408361256	0	142	standard ATAC-Seq in frozen liver
peak_49419	chr2	170141561	170141878	317	6.10586222240696	5.99205378462837	1.6057842627127	3.7315434730353	0.000190310159287819	0.00530100408361256	0	54.5	standard ATAC-Seq in frozen liver
peak_59443	chr4	146960580	146961486	906	6.10586222240696	5.99205378462837	1.6057842627127	3.7315434730353	0.000190310159287819	0.00530100408361256	2	151	standard ATAC-Seq in frozen liver
peak_60300	chr5	16973591	16973795	204	6.10586222240696	5.99205378462837	1.6057842627127	3.7315434730353	0.000190310159287819	0.00530100408361256	0	34.5	standard ATAC-Seq in frozen liver
peak_73460	chr7	96440822	96441226	404	6.10586222240696	5.99205378462837	1.6057842627127	3.7315434730353	0.000190310159287819	0.00530100408361256	0	70	standard ATAC-Seq in frozen liver
peak_77022	chr8	40240698	40241362	664	6.10586222240696	5.99205378462837	1.6057842627127	3.7315434730353	0.000190310159287819	0.00530100408361256	0	112.5	standard ATAC-Seq in frozen liver
peak_80513	chr8_random	36469	37002	533	6.10586222240696	5.99205378462837	1.6057842627127	3.7315434730353	0.000190310159287819	0.00530100408361256	0	92	standard ATAC-Seq in frozen liver
peak_85353	chrX	4657558	4658182	624	6.10586222240696	5.99205378462837	1.6057842627127	3.7315434730353	0.000190310159287819	0.00530100408361256	2	106	standard ATAC-Seq in frozen liver
peak_71946	chr7	39201456	39201675	219	10.6184940901755	4.27508296590688	1.14580606749007	3.73107028074273	0.000190668018764547	0.00530104832577334	2	61	standard ATAC-Seq in frozen liver
peak_25169	chr14	42724922	42725140	218	6.10027310449414	5.99109896934957	1.60583934418247	3.73082088881042	0.000190856879929064	0.00530104832577334	0	35.5	standard ATAC-Seq in frozen liver
peak_25233	chr14	44677704	44677997	293	6.10027310449414	5.99109896934957	1.60583934418247	3.73082088881042	0.000190856879929064	0.00530104832577334	0	49.5	standard ATAC-Seq in frozen liver
peak_27366	chr14	123850700	123851054	354	6.10027310449414	5.99109896934957	1.60583934418247	3.73082088881042	0.000190856879929064	0.00530104832577334	0	58.5	standard ATAC-Seq in frozen liver
peak_34560	chr17	13600639	13601323	684	6.10027310449414	5.99109896934957	1.60583934418247	3.73082088881042	0.000190856879929064	0.00530104832577334	0	115.5	standard ATAC-Seq in frozen liver
peak_46714	chr2	105093056	105093271	215	6.10027310449414	5.99109896934957	1.60583934418247	3.73082088881042	0.000190856879929064	0.00530104832577334	0.5	35.5	standard ATAC-Seq in frozen liver
peak_55959	chr4	60560293	60560632	339	6.10027310449414	5.99109896934957	1.60583934418247	3.73082088881042	0.000190856879929064	0.00530104832577334	0	55.5	standard ATAC-Seq in frozen liver
peak_56020	chr4	61337488	61337693	205	6.10027310449414	5.99109896934957	1.60583934418247	3.73082088881042	0.000190856879929064	0.00530104832577334	0	34.5	standard ATAC-Seq in frozen liver
peak_69364	chr6	122125756	122126207	451	6.10027310449414	5.99109896934957	1.60583934418247	3.73082088881042	0.000190856879929064	0.00530104832577334	0	78	standard ATAC-Seq in frozen liver
peak_60227	chr5	14980461	14980764	303	13.4042390157554	5.65544284003275	1.51600253108565	3.7304969642648	0.00019110244613149	0.00530565756912431	1	109.5	standard ATAC-Seq in frozen liver
peak_1999	chr1	84984055	84984263	208	6.10725950188517	5.99229640339315	1.60842074844661	3.72557765695352	0.000194868446647923	0.00538512522329636	0	36.5	standard ATAC-Seq in frozen liver
peak_2021	chr1	85342643	85342843	200	6.10725950188517	5.99229640339315	1.60842074844661	3.72557765695352	0.000194868446647923	0.00538512522329636	0	33.5	standard ATAC-Seq in frozen liver
peak_25180	chr14	43338996	43339205	209	6.10725950188517	5.99229640339315	1.60842074844661	3.72557765695352	0.000194868446647923	0.00538512522329636	0	36	standard ATAC-Seq in frozen liver
peak_55200	chr4	41812824	41813152	328	6.10725950188517	5.99229640339315	1.60842074844661	3.72557765695352	0.000194868446647923	0.00538512522329636	0	54.5	standard ATAC-Seq in frozen liver
peak_56017	chr4	61300354	61300614	260	6.10725950188517	5.99229640339315	1.60842074844661	3.72557765695352	0.000194868446647923	0.00538512522329636	0	43	standard ATAC-Seq in frozen liver
peak_59387	chr4	145742421	145742859	438	6.10725950188517	5.99229640339315	1.60842074844661	3.72557765695352	0.000194868446647923	0.00538512522329636	1.5	73.5	standard ATAC-Seq in frozen liver
peak_62172	chr5	88591504	88591897	393	6.10725950188517	5.99229640339315	1.60842074844661	3.72557765695352	0.000194868446647923	0.00538512522329636	0	68	standard ATAC-Seq in frozen liver
peak_80530	chr8_random	479504	480000	496	6.10725950188517	5.99229640339315	1.60842074844661	3.72557765695352	0.000194868446647923	0.00538512522329636	0	85.5	standard ATAC-Seq in frozen liver
peak_85145	chrUn_random	2448570	2448780	210	6.10725950188517	5.99229640339315	1.60842074844661	3.72557765695352	0.000194868446647923	0.00538512522329636	0	35.5	standard ATAC-Seq in frozen liver
peak_19776	chr12	116602733	116602934	201	6.09887582501593	5.99085618776352	1.60850605589415	3.72448469547928	0.00019571458440109	0.00539828071610433	0	33.5	standard ATAC-Seq in frozen liver
peak_22247	chr13	65554106	65554421	315	6.09887582501593	5.99085618776352	1.60850605589415	3.72448469547928	0.00019571458440109	0.00539828071610433	0	51.5	standard ATAC-Seq in frozen liver
peak_77867	chr8	73650982	73651187	205	6.09887582501593	5.99085618776352	1.60850605589415	3.72448469547928	0.00019571458440109	0.00539828071610433	0	34	standard ATAC-Seq in frozen liver
peak_85152	chrUn_random	2518652	2519042	390	6.09887582501593	5.99085618776352	1.60850605589415	3.72448469547928	0.00019571458440109	0.00539828071610433	0	66	standard ATAC-Seq in frozen liver
peak_71374	chr7	26928282	26928995	713	10.6369741093459	3.65585648366092	0.982675638430067	3.72030845244271	0.000198979608649361	0.00547797935494918	11	193.5	standard ATAC-Seq in frozen liver
peak_34595	chr17	14108720	14109014	294	10.6087131338281	4.27410089236542	1.14903485194979	3.71973129023262	0.000199434843543522	0.0054840416956999	2	82.5	standard ATAC-Seq in frozen liver
peak_19797	chr12	116748534	116748779	245	6.10865678136338	5.99254367576196	1.6121883148431	3.71702463080138	0.000201582797423475	0.00552358323347062	0	43	standard ATAC-Seq in frozen liver
peak_22262	chr13	65734091	65734369	278	6.10865678136338	5.99254367576196	1.6121883148431	3.71702463080138	0.000201582797423475	0.00552358323347062	0	47	standard ATAC-Seq in frozen liver
peak_43227	chr1_random	888752	889059	307	6.10865678136338	5.99254367576196	1.6121883148431	3.71702463080138	0.000201582797423475	0.00552358323347062	0	52	standard ATAC-Seq in frozen liver
peak_55982	chr4	60903709	60904201	492	6.10865678136338	5.99254367576196	1.6121883148431	3.71702463080138	0.000201582797423475	0.00552358323347062	1	85	standard ATAC-Seq in frozen liver
peak_85129	chrUn_random	2389448	2389648	200	6.10865678136338	5.99254367576196	1.6121883148431	3.71702463080138	0.000201582797423475	0.00552358323347062	0	34	standard ATAC-Seq in frozen liver
peak_59424	chr4	146711028	146711287	259	10.8633761116094	4.30829144861869	1.15994559270797	3.71421855964874	0.000203832575428603	0.00557127519329667	3	74.5	standard ATAC-Seq in frozen liver
peak_34636	chr17	15159092	15159442	350	13.169137950669	5.62990225280124	1.51689922493136	3.71145436708625	0.000206071821572576	0.00562720741098604	2	123	standard ATAC-Seq in frozen liver
peak_60262	chr5	15164666	15164983	317	13.1677406711908	5.62979146874489	1.51711656834881	3.71084963818712	0.000206564777505551	0.00563890915861147	1	113	standard ATAC-Seq in frozen liver
peak_85315	chrUn_random	5888686	5888888	202	13.1757934017362	5.62994186459256	1.51754608601417	3.70989844491616	0.000207342402125898	0.0056583722144236	1	72.5	standard ATAC-Seq in frozen liver
peak_52097	chr3	93624811	93625017	206	6.11005406084158	5.99279704377595	1.617186494291	3.70569323014491	0.000210813336049909	0.00573056071287797	0	36	standard ATAC-Seq in frozen liver
peak_68882	chr6	114535195	114535395	200	6.11005406084158	5.99279704377595	1.617186494291	3.70569323014491	0.000210813336049909	0.00573056071287797	0	34	standard ATAC-Seq in frozen liver
peak_9927	chr10	111488812	111489022	210	6.09608126605952	5.99035494638001	1.61734952510214	3.70380975380179	0.000212385563208733	0.00576365026557057	0	36	standard ATAC-Seq in frozen liver
peak_60229	chr5	14982241	14982443	202	13.1799852401708	5.63027723145023	1.52037179367175	3.70322394488319	0.000212876806369214	0.0057751907057121	1	72.5	standard ATAC-Seq in frozen liver
peak_11009	chr11	7750095	7750386	291	10.381664799287	4.24092898564879	1.14672938874395	3.69828228636749	0.00021706341512224	0.00585810984862922	3	80.5	standard ATAC-Seq in frozen liver
peak_71956	chr7	39328661	39329047	386	10.3788702403306	4.24064520524287	1.14669339337536	3.69815090044279	0.00021717577421547	0.0058591265670665	6	105	standard ATAC-Seq in frozen liver
peak_87160	chrX	145110840	145111181	341	10.3844593582435	4.24121538144633	1.14873937199385	3.69206060560536	0.000222444437654069	0.00597915071838036	3	95	standard ATAC-Seq in frozen liver
peak_60272	chr5	15195244	15195456	212	12.9417586698041	5.60352866791971	1.51915181520314	3.68859031193693	0.000225499984214196	0.00605013277695961	1	74	standard ATAC-Seq in frozen liver
peak_60224	chr5	14971116	14971408	292	12.9406923366497	5.60394832237923	1.52008077572519	3.68661219316174	0.000227259274992559	0.0060935981887481	1	103.5	standard ATAC-Seq in frozen liver
peak_6589	chr10	22112786	22113882	1096	5.86903293151848	5.93511740340118	1.61346113175173	3.67850039062139	0.00023460933184903	0.00621170822243366	2.5	179.5	standard ATAC-Seq in frozen liver
peak_11050	chr11	8828597	8828839	242	5.86903293151848	5.93511740340118	1.61346113175173	3.67850039062139	0.00023460933184903	0.00621170822243366	0	39	standard ATAC-Seq in frozen liver
peak_19742	chr12	116168252	116168518	266	5.86903293151848	5.93511740340118	1.61346113175173	3.67850039062139	0.00023460933184903	0.00621170822243366	0	43.5	standard ATAC-Seq in frozen liver
peak_19749	chr12	116357550	116358017	467	5.86903293151848	5.93511740340118	1.61346113175173	3.67850039062139	0.00023460933184903	0.00621170822243366	1	75.5	standard ATAC-Seq in frozen liver
peak_22256	chr13	65680753	65681046	293	5.86903293151848	5.93511740340118	1.61346113175173	3.67850039062139	0.00023460933184903	0.00621170822243366	0	47	standard ATAC-Seq in frozen liver
peak_25192	chr14	43637837	43638163	326	5.86903293151848	5.93511740340118	1.61346113175173	3.67850039062139	0.00023460933184903	0.00621170822243366	0	53	standard ATAC-Seq in frozen liver
peak_32156	chr16	30717618	30718706	1088	5.86903293151848	5.93511740340118	1.61346113175173	3.67850039062139	0.00023460933184903	0.00621170822243366	3	174.5	standard ATAC-Seq in frozen liver
peak_34865	chr17	24761920	24762142	222	5.86903293151848	5.93511740340118	1.61346113175173	3.67850039062139	0.00023460933184903	0.00621170822243366	0	36	standard ATAC-Seq in frozen liver
peak_36795	chr17	66367723	66368249	526	5.86903293151848	5.93511740340118	1.61346113175173	3.67850039062139	0.00023460933184903	0.00621170822243366	0	86	standard ATAC-Seq in frozen liver
peak_38779	chr18	38266961	38267226	265	5.86903293151848	5.93511740340118	1.61346113175173	3.67850039062139	0.00023460933184903	0.00621170822243366	0	44	standard ATAC-Seq in frozen liver
peak_42984	chr19	56593933	56594244	311	5.86903293151848	5.93511740340118	1.61346113175173	3.67850039062139	0.00023460933184903	0.00621170822243366	0	50.5	standard ATAC-Seq in frozen liver
peak_43215	chr1_random	628039	628377	338	5.86903293151848	5.93511740340118	1.61346113175173	3.67850039062139	0.00023460933184903	0.00621170822243366	0	55.5	standard ATAC-Seq in frozen liver
peak_43231	chr1_random	993247	993557	310	5.86903293151848	5.93511740340118	1.61346113175173	3.67850039062139	0.00023460933184903	0.00621170822243366	0	51	standard ATAC-Seq in frozen liver
peak_52099	chr3	93828525	93828803	278	5.86903293151848	5.93511740340118	1.61346113175173	3.67850039062139	0.00023460933184903	0.00621170822243366	0	46	standard ATAC-Seq in frozen liver
peak_52100	chr3	93940754	93941027	273	5.86903293151848	5.93511740340118	1.61346113175173	3.67850039062139	0.00023460933184903	0.00621170822243366	0	43.5	standard ATAC-Seq in frozen liver
peak_61211	chr5	44533956	44534156	200	5.86903293151848	5.93511740340118	1.61346113175173	3.67850039062139	0.00023460933184903	0.00621170822243366	0	33.5	standard ATAC-Seq in frozen liver
peak_66084	chr6	30754667	30755086	419	5.86903293151848	5.93511740340118	1.61346113175173	3.67850039062139	0.00023460933184903	0.00621170822243366	1	69	standard ATAC-Seq in frozen liver
peak_72319	chr7	55379727	55379950	223	5.86903293151848	5.93511740340118	1.61346113175173	3.67850039062139	0.00023460933184903	0.00621170822243366	0	35.5	standard ATAC-Seq in frozen liver
peak_85229	chrUn_random	4262082	4262588	506	5.86903293151848	5.93511740340118	1.61346113175173	3.67850039062139	0.00023460933184903	0.00621170822243366	0	84	standard ATAC-Seq in frozen liver
peak_22244	chr13	65523144	65523353	209	5.86763565204027	5.93486840037273	1.61347818474392	3.67830718536469	0.000234787083945321	0.00621170822243366	0	33	standard ATAC-Seq in frozen liver
peak_25191	chr14	43636056	43636286	230	5.86763565204027	5.93486840037273	1.61347818474392	3.67830718536469	0.000234787083945321	0.00621170822243366	0	37.5	standard ATAC-Seq in frozen liver
peak_52297	chr3	96290647	96290964	317	5.86763565204027	5.93486840037273	1.61347818474392	3.67830718536469	0.000234787083945321	0.00621170822243366	0	52	standard ATAC-Seq in frozen liver
peak_55995	chr4	61102704	61103003	299	5.86763565204027	5.93486840037273	1.61347818474392	3.67830718536469	0.000234787083945321	0.00621170822243366	0	48.5	standard ATAC-Seq in frozen liver
peak_70792	chr7	7022887	7023264	377	5.86763565204027	5.93486840037273	1.61347818474392	3.67830718536469	0.000234787083945321	0.00621170822243366	0	60.5	standard ATAC-Seq in frozen liver
peak_72109	chr7	51994067	51994567	500	5.86763565204027	5.93486840037273	1.61347818474392	3.67830718536469	0.000234787083945321	0.00621170822243366	0	80.5	standard ATAC-Seq in frozen liver
peak_72314	chr7	54881337	54881537	200	5.86763565204027	5.93486840037273	1.61347818474392	3.67830718536469	0.000234787083945321	0.00621170822243366	0	32	standard ATAC-Seq in frozen liver
peak_77021	chr8	40238222	40238638	416	5.86763565204027	5.93486840037273	1.61347818474392	3.67830718536469	0.000234787083945321	0.00621170822243366	0	68	standard ATAC-Seq in frozen liver
peak_77687	chr8	72023028	72023250	222	5.86763565204027	5.93486840037273	1.61347818474392	3.67830718536469	0.000234787083945321	0.00621170822243366	0	36	standard ATAC-Seq in frozen liver
peak_80277	chr8	127657722	127658225	503	5.86763565204027	5.93486840037273	1.61347818474392	3.67830718536469	0.000234787083945321	0.00621170822243366	0	81.5	standard ATAC-Seq in frozen liver
peak_85226	chrUn_random	4258714	4259013	299	5.86763565204027	5.93486840037273	1.61347818474392	3.67830718536469	0.000234787083945321	0.00621170822243366	0	49.5	standard ATAC-Seq in frozen liver
peak_85297	chrUn_random	5548263	5549144	881	5.86763565204027	5.93486840037273	1.61347818474392	3.67830718536469	0.000234787083945321	0.00621170822243366	0	143.5	standard ATAC-Seq in frozen liver
peak_85350	chrX	4495747	4496052	305	5.86763565204027	5.93486840037273	1.61347818474392	3.67830718536469	0.000234787083945321	0.00621170822243366	0	50	standard ATAC-Seq in frozen liver
peak_3571	chr1	138261329	138261758	429	10.3771420145286	4.23950684739321	1.15268675481625	3.67793490267791	0.000235129946711268	0.00621889930680673	7	115.5	standard ATAC-Seq in frozen liver
peak_59431	chr4	146797849	146798082	233	12.9448841750844	5.60431306289265	1.52415970315079	3.67698545717175	0.000236006489784735	0.00624019697264962	1	82	standard ATAC-Seq in frozen liver
peak_77	chr1	9228296	9228615	319	5.87043021099669	5.93536722133605	1.61458232679161	3.67610069975831	0.000236826070862562	0.00624220526033798	0	52	standard ATAC-Seq in frozen liver
peak_19664	chr12	114020065	114020555	490	5.87043021099669	5.93536722133605	1.61458232679161	3.67610069975831	0.000236826070862562	0.00624220526033798	0	79.5	standard ATAC-Seq in frozen liver
peak_19784	chr12	116634756	116635124	368	5.87043021099669	5.93536722133605	1.61458232679161	3.67610069975831	0.000236826070862562	0.00624220526033798	0	60	standard ATAC-Seq in frozen liver
peak_22255	chr13	65664336	65664541	205	5.87043021099669	5.93536722133605	1.61458232679161	3.67610069975831	0.000236826070862562	0.00624220526033798	0	33.5	standard ATAC-Seq in frozen liver
peak_22344	chr13	66835308	66835608	300	5.87043021099669	5.93536722133605	1.61458232679161	3.67610069975831	0.000236826070862562	0.00624220526033798	0	49.5	standard ATAC-Seq in frozen liver
peak_22468	chr13	70144423	70144757	334	5.87043021099669	5.93536722133605	1.61458232679161	3.67610069975831	0.000236826070862562	0.00624220526033798	0	53	standard ATAC-Seq in frozen liver
peak_25222	chr14	44512641	44512847	206	5.87043021099669	5.93536722133605	1.61458232679161	3.67610069975831	0.000236826070862562	0.00624220526033798	0	34	standard ATAC-Seq in frozen liver
peak_55983	chr4	60908566	60908958	392	5.87043021099669	5.93536722133605	1.61458232679161	3.67610069975831	0.000236826070862562	0.00624220526033798	0	65.5	standard ATAC-Seq in frozen liver
peak_85150	chrUn_random	2489417	2489730	313	5.87043021099669	5.93536722133605	1.61458232679161	3.67610069975831	0.000236826070862562	0.00624220526033798	0	52	standard ATAC-Seq in frozen liver
peak_23933	chr13_random	307016	307687	671	5.86623837256207	5.93461850645668	1.61463410664145	3.67551910494515	0.000237366275967559	0.00624220526033798	0	107.5	standard ATAC-Seq in frozen liver
peak_25182	chr14	43353084	43353552	468	5.86623837256207	5.93461850645668	1.61463410664145	3.67551910494515	0.000237366275967559	0.00624220526033798	0	73	standard ATAC-Seq in frozen liver
peak_43238	chr1_random	1089652	1090015	363	5.86623837256207	5.93461850645668	1.61463410664145	3.67551910494515	0.000237366275967559	0.00624220526033798	0	58.5	standard ATAC-Seq in frozen liver
peak_43712	chr2	17672675	17672889	214	5.86623837256207	5.93461850645668	1.61463410664145	3.67551910494515	0.000237366275967559	0.00624220526033798	0	34	standard ATAC-Seq in frozen liver
peak_59402	chr4	146206906	146207230	324	5.86623837256207	5.93461850645668	1.61463410664145	3.67551910494515	0.000237366275967559	0.00624220526033798	0	52	standard ATAC-Seq in frozen liver
peak_59452	chr4	147151201	147151498	297	5.86623837256207	5.93461850645668	1.61463410664145	3.67551910494515	0.000237366275967559	0.00624220526033798	0	49	standard ATAC-Seq in frozen liver
peak_66806	chr6	50997332	50997674	342	5.86623837256207	5.93461850645668	1.61463410664145	3.67551910494515	0.000237366275967559	0.00624220526033798	0	54	standard ATAC-Seq in frozen liver
peak_70869	chr7	14518670	14518879	209	5.86623837256207	5.93461850645668	1.61463410664145	3.67551910494515	0.000237366275967559	0.00624220526033798	0	34	standard ATAC-Seq in frozen liver
peak_2031	chr1	87447083	87447326	243	5.87182749047489	5.93561956908683	1.61686850377509	3.67105893597919	0.000241547628713764	0.00631949974964061	0	41	standard ATAC-Seq in frozen liver
peak_19805	chr12	116804592	116804823	231	5.87182749047489	5.93561956908683	1.61686850377509	3.67105893597919	0.000241547628713764	0.00631949974964061	0	38	standard ATAC-Seq in frozen liver
peak_27755	chr15	22999971	23000236	265	5.87182749047489	5.93561956908683	1.61686850377509	3.67105893597919	0.000241547628713764	0.00631949974964061	0	42.5	standard ATAC-Seq in frozen liver
peak_34290	chr17	5890520	5890832	312	5.87182749047489	5.93561956908683	1.61686850377509	3.67105893597919	0.000241547628713764	0.00631949974964061	0	50.5	standard ATAC-Seq in frozen liver
peak_60213	chr5	14933678	14934112	434	12.7010684868048	5.57658063347115	1.51942600248071	3.67018902162164	0.000242371174287809	0.00631949974964061	3	150	standard ATAC-Seq in frozen liver
peak_83487	chr9	81118609	81118912	303	12.7010684868048	5.57658063347115	1.51942600248071	3.67018902162164	0.000242371174287809	0.00631949974964061	2	104.5	standard ATAC-Seq in frozen liver
peak_9382	chr10	94334648	94334998	350	12.6996712073266	5.57646546706644	1.51941396671648	3.67014229776855	0.000242415482088515	0.00631949974964061	2	120.5	standard ATAC-Seq in frozen liver
peak_7113	chr10	41164754	41164954	200	5.86484109308386	5.9343660121941	1.61695688069165	3.67008303255166	0.000242471693681294	0.00631949974964061	0	32	standard ATAC-Seq in frozen liver
peak_16428	chr12	8411420	8411785	365	5.86484109308386	5.9343660121941	1.61695688069165	3.67008303255166	0.000242471693681294	0.00631949974964061	0	58	standard ATAC-Seq in frozen liver
peak_19708	chr12	114532779	114532982	203	5.86484109308386	5.9343660121941	1.61695688069165	3.67008303255166	0.000242471693681294	0.00631949974964061	0	33	standard ATAC-Seq in frozen liver
peak_22312	chr13	66518706	66518918	212	5.86484109308386	5.9343660121941	1.61695688069165	3.67008303255166	0.000242471693681294	0.00631949974964061	0	35	standard ATAC-Seq in frozen liver
peak_22415	chr13	68585852	68586070	218	5.86484109308386	5.9343660121941	1.61695688069165	3.67008303255166	0.000242471693681294	0.00631949974964061	0	35	standard ATAC-Seq in frozen liver
peak_25163	chr14	42552987	42553188	201	5.86484109308386	5.9343660121941	1.61695688069165	3.67008303255166	0.000242471693681294	0.00631949974964061	0	32.5	standard ATAC-Seq in frozen liver
peak_25196	chr14	43729615	43729914	299	5.86484109308386	5.9343660121941	1.61695688069165	3.67008303255166	0.000242471693681294	0.00631949974964061	0	47	standard ATAC-Seq in frozen liver
peak_29298	chr15	75935142	75935526	384	5.86484109308386	5.9343660121941	1.61695688069165	3.67008303255166	0.000242471693681294	0.00631949974964061	1	61.5	standard ATAC-Seq in frozen liver
peak_62478	chr5	94948303	94948660	357	5.86484109308386	5.9343660121941	1.61695688069165	3.67008303255166	0.000242471693681294	0.00631949974964061	0	58	standard ATAC-Seq in frozen liver
peak_71630	chr7	30408246	30408500	254	5.86484109308386	5.9343660121941	1.61695688069165	3.67008303255166	0.000242471693681294	0.00631949974964061	0	40	standard ATAC-Seq in frozen liver
peak_72019	chr7	48319534	48320027	493	5.86484109308386	5.9343660121941	1.61695688069165	3.67008303255166	0.000242471693681294	0.00631949974964061	0	78.5	standard ATAC-Seq in frozen liver
peak_85131	chrUn_random	2403911	2404582	671	5.86484109308386	5.9343660121941	1.61695688069165	3.67008303255166	0.000242471693681294	0.00631949974964061	0	111	standard ATAC-Seq in frozen liver
peak_85372	chrX	5195257	5195492	235	5.86484109308386	5.9343660121941	1.61695688069165	3.67008303255166	0.000242471693681294	0.00631949974964061	0	38	standard ATAC-Seq in frozen liver
peak_85778	chrX	31530952	31531288	336	5.86484109308386	5.9343660121941	1.61695688069165	3.67008303255166	0.000242471693681294	0.00631949974964061	0	54	standard ATAC-Seq in frozen liver
peak_86191	chrX	65616551	65616770	219	5.86484109308386	5.9343660121941	1.61695688069165	3.67008303255166	0.000242471693681294	0.00631949974964061	0	34.5	standard ATAC-Seq in frozen liver
peak_71036	chr7	18125349	18125852	503	12.7063266583938	5.57650785976529	1.52011053646478	3.66848839343895	0.00024398876827971	0.00635336299050043	3	175	standard ATAC-Seq in frozen liver
peak_19748	chr12	116356194	116356597	403	5.8732247699531	5.93587604828941	1.62037691757172	3.66326870243552	0.000249017075989655	0.00646890040769922	0	65	standard ATAC-Seq in frozen liver
peak_19759	chr12	116441994	116442376	382	5.8732247699531	5.93587604828941	1.62037691757172	3.66326870243552	0.000249017075989655	0.00646890040769922	0	63	standard ATAC-Seq in frozen liver
peak_2006	chr1	85077355	85077638	283	5.86344381360565	5.93410928040986	1.62050502146691	3.66188885674554	0.000250362480779697	0.00649036550810375	0	46	standard ATAC-Seq in frozen liver
peak_19735	chr12	116026537	116026784	247	5.86344381360565	5.93410928040986	1.62050502146691	3.66188885674554	0.000250362480779697	0.00649036550810375	0	39.5	standard ATAC-Seq in frozen liver
peak_39265	chr18	54029673	54029898	225	5.86344381360565	5.93410928040986	1.62050502146691	3.66188885674554	0.000250362480779697	0.00649036550810375	0	35	standard ATAC-Seq in frozen liver
peak_52095	chr3	93565159	93565413	254	5.86344381360565	5.93410928040986	1.62050502146691	3.66188885674554	0.000250362480779697	0.00649036550810375	0	41	standard ATAC-Seq in frozen liver
peak_59372	chr4	145230553	145230833	280	5.86344381360565	5.93410928040986	1.62050502146691	3.66188885674554	0.000250362480779697	0.00649036550810375	0	45	standard ATAC-Seq in frozen liver
peak_60260	chr5	15159020	15159505	485	12.7080548841959	5.57717513069167	1.52322718399047	3.66142042980146	0.000250820763748984	0.00649839621745036	2	168.5	standard ATAC-Seq in frozen liver
peak_11010	chr11	7750883	7751186	303	10.1448355083986	4.20594913705302	1.1488010005301	3.66116423567898	0.000251071742589643	0.00650104965671686	4	80.5	standard ATAC-Seq in frozen liver
peak_34772	chr17	23671549	23671851	302	10.1448355083986	4.20594913705302	1.1488010005301	3.66116423567898	0.000251071742589643	0.00650104965671686	2.5	80.5	standard ATAC-Seq in frozen liver
peak_71978	chr7	46595319	46595577	258	10.1434382289203	4.20580381284721	1.14929507416257	3.65946388129416	0.000252743461872421	0.00653466914021047	2	69.5	standard ATAC-Seq in frozen liver
peak_34596	chr17	14172452	14172677	225	5.87462204943131	5.93613833413829	1.62522178277852	3.65250970485377	0.000259689778480376	0.00667286838603171	0	37.5	standard ATAC-Seq in frozen liver
peak_46716	chr2	105098919	105099253	334	5.87462204943131	5.93613833413829	1.62522178277852	3.65250970485377	0.000259689778480376	0.00667286838603171	0	54.5	standard ATAC-Seq in frozen liver
peak_59395	chr4	146040822	146041141	319	5.87462204943131	5.93613833413829	1.62522178277852	3.65250970485377	0.000259689778480376	0.00667286838603171	0	51.5	standard ATAC-Seq in frozen liver
peak_79761	chr8	122419515	122419805	290	5.87462204943131	5.93613833413829	1.62522178277852	3.65250970485377	0.000259689778480376	0.00667286838603171	0	48.5	standard ATAC-Seq in frozen liver
peak_85346	chrX	4267631	4267855	224	5.87462204943131	5.93613833413829	1.62522178277852	3.65250970485377	0.000259689778480376	0.00667286838603171	0	38	standard ATAC-Seq in frozen liver
peak_80514	chr8_random	41078	41278	200	5.86204653412745	5.93384665731238	1.6253875749508	3.65072721654834	0.000261498856222133	0.00671023048248689	0	32	standard ATAC-Seq in frozen liver
peak_60244	chr5	15044853	15045067	214	12.4670337548728	5.5491621374343	1.52081320496824	3.648812437521	0.000263455358132173	0.00674783420789278	1	71.5	standard ATAC-Seq in frozen liver
peak_85282	chrUn_random	5332843	5333075	232	12.4628419164381	5.54881058206613	1.52115910863395	3.6477516063715	0.000264545204077731	0.00677178464921877	1	77.5	standard ATAC-Seq in frozen liver
peak_60220	chr5	14959450	14959879	429	12.4698283138292	5.54940067776081	1.52186094108676	3.64645712886093	0.000265880812317041	0.00680199439145722	2	145	standard ATAC-Seq in frozen liver
peak_24902	chr14	32679380	32679892	512	10.9034616552304	3.2418145997387	0.890662417225468	3.63977926657935	0.000272871853835815	0.00694632686906826	11	137.5	standard ATAC-Seq in frozen liver
peak_16725	chr12	20305949	20306149	200	5.87601932890951	5.9364077321056	1.6314514139949	3.63872787211557	0.000273988130302314	0.00696663776174557	0	33.5	standard ATAC-Seq in frozen liver
peak_19737	chr12	116050503	116050721	218	5.87601932890951	5.9364077321056	1.6314514139949	3.63872787211557	0.000273988130302314	0.00696663776174557	0	36.5	standard ATAC-Seq in frozen liver
peak_60232	chr5	14994451	14994736	285	12.2329990229407	5.52121251471841	1.52229514096916	3.62690017600881	0.000286844123052681	0.00722676933349216	1	95	standard ATAC-Seq in frozen liver
peak_54254	chr3	152364571	152364853	282	12.2354626355733	5.5208995330967	1.52221526306672	3.62688488747253	0.00028686110061303	0.00722676933349216	2	95	standard ATAC-Seq in frozen liver
peak_2009	chr1	85124939	85125295	356	5.6336009201082	5.87609920135679	1.62400284696644	3.61828134250691	0.000296565908558845	0.00738571957682507	0	57	standard ATAC-Seq in frozen liver
peak_3367	chr1	135491214	135491751	537	5.6336009201082	5.87609920135679	1.62400284696644	3.61828134250691	0.000296565908558845	0.00738571957682507	0	82	standard ATAC-Seq in frozen liver
peak_5547	chr1	191729742	191730027	285	5.6336009201082	5.87609920135679	1.62400284696644	3.61828134250691	0.000296565908558845	0.00738571957682507	0	45	standard ATAC-Seq in frozen liver
peak_23915	chr13_random	21477	21774	297	5.6336009201082	5.87609920135679	1.62400284696644	3.61828134250691	0.000296565908558845	0.00738571957682507	0	48	standard ATAC-Seq in frozen liver
peak_24608	chr14	26730865	26731121	256	5.6336009201082	5.87609920135679	1.62400284696644	3.61828134250691	0.000296565908558845	0.00738571957682507	0	39.5	standard ATAC-Seq in frozen liver
peak_27082	chr14	118169065	118169364	299	5.6336009201082	5.87609920135679	1.62400284696644	3.61828134250691	0.000296565908558845	0.00738571957682507	0	46.5	standard ATAC-Seq in frozen liver
peak_34326	chr17	6600576	6601535	959	5.6336009201082	5.87609920135679	1.62400284696644	3.61828134250691	0.000296565908558845	0.00738571957682507	0	146.5	standard ATAC-Seq in frozen liver
peak_43480	chr2	7125777	7126277	500	5.6336009201082	5.87609920135679	1.62400284696644	3.61828134250691	0.000296565908558845	0.00738571957682507	1	78.5	standard ATAC-Seq in frozen liver
peak_47294	chr2	125592077	125592429	352	5.6336009201082	5.87609920135679	1.62400284696644	3.61828134250691	0.000296565908558845	0.00738571957682507	0	54.5	standard ATAC-Seq in frozen liver
peak_55199	chr4	41781400	41781754	354	5.6336009201082	5.87609920135679	1.62400284696644	3.61828134250691	0.000296565908558845	0.00738571957682507	0	55	standard ATAC-Seq in frozen liver
peak_56068	chr4	61970859	61971059	200	5.6336009201082	5.87609920135679	1.62400284696644	3.61828134250691	0.000296565908558845	0.00738571957682507	0	32	standard ATAC-Seq in frozen liver
peak_64766	chr5	140914759	140915550	791	5.6336009201082	5.87609920135679	1.62400284696644	3.61828134250691	0.000296565908558845	0.00738571957682507	1	123	standard ATAC-Seq in frozen liver
peak_71970	chr7	46541365	46541602	237	5.6336009201082	5.87609920135679	1.62400284696644	3.61828134250691	0.000296565908558845	0.00738571957682507	0	36.5	standard ATAC-Seq in frozen liver
peak_85122	chrUn_random	732698	733074	376	5.6336009201082	5.87609920135679	1.62400284696644	3.61828134250691	0.000296565908558845	0.00738571957682507	0	57.5	standard ATAC-Seq in frozen liver
peak_86872	chrX	121233649	121234540	891	5.6336009201082	5.87609920135679	1.62400284696644	3.61828134250691	0.000296565908558845	0.00738571957682507	2	139.5	standard ATAC-Seq in frozen liver
peak_60221	chr5	14961570	14961770	200	10.1521528521134	4.20775996455036	1.16306680709256	3.61781450462759	0.000297101199648324	0.00738571957682507	2	53.5	standard ATAC-Seq in frozen liver
peak_3764	chr1	144256220	144256463	243	5.63499819958641	5.87636075026521	1.62460439637035	3.61710257795314	0.000297919259869069	0.00738571957682507	0	37.5	standard ATAC-Seq in frozen liver
peak_10978	chr11	6649754	6650091	337	5.63499819958641	5.87636075026521	1.62460439637035	3.61710257795314	0.000297919259869069	0.00738571957682507	0	52	standard ATAC-Seq in frozen liver
peak_19779	chr12	116618299	116618613	314	5.63499819958641	5.87636075026521	1.62460439637035	3.61710257795314	0.000297919259869069	0.00738571957682507	0	48.5	standard ATAC-Seq in frozen liver
peak_25175	chr14	42963367	42963630	263	5.63499819958641	5.87636075026521	1.62460439637035	3.61710257795314	0.000297919259869069	0.00738571957682507	0	41	standard ATAC-Seq in frozen liver
peak_34328	chr17	6684469	6684778	309	5.63499819958641	5.87636075026521	1.62460439637035	3.61710257795314	0.000297919259869069	0.00738571957682507	0	47.5	standard ATAC-Seq in frozen liver
peak_36468	chr17	54899986	54900790	804	5.63499819958641	5.87636075026521	1.62460439637035	3.61710257795314	0.000297919259869069	0.00738571957682507	1	125.5	standard ATAC-Seq in frozen liver
peak_49586	chr2	175100463	175100838	375	5.63499819958641	5.87636075026521	1.62460439637035	3.61710257795314	0.000297919259869069	0.00738571957682507	0	58.5	standard ATAC-Seq in frozen liver
peak_55978	chr4	60889877	60890119	242	5.63499819958641	5.87636075026521	1.62460439637035	3.61710257795314	0.000297919259869069	0.00738571957682507	0	38	standard ATAC-Seq in frozen liver
peak_68881	chr6	114523036	114523267	231	5.63499819958641	5.87636075026521	1.62460439637035	3.61710257795314	0.000297919259869069	0.00738571957682507	0	36	standard ATAC-Seq in frozen liver
peak_69641	chr6	127418686	127419014	328	5.63499819958641	5.87636075026521	1.62460439637035	3.61710257795314	0.000297919259869069	0.00738571957682507	0	51	standard ATAC-Seq in frozen liver
peak_85148	chrUn_random	2480540	2480750	210	5.63499819958641	5.87636075026521	1.62460439637035	3.61710257795314	0.000297919259869069	0.00738571957682507	0	33	standard ATAC-Seq in frozen liver
peak_85239	chrUn_random	4606701	4607008	307	5.63499819958641	5.87636075026521	1.62460439637035	3.61710257795314	0.000297919259869069	0.00738571957682507	0	46.5	standard ATAC-Seq in frozen liver
peak_85325	chrX	3094106	3094738	632	5.63499819958641	5.87636075026521	1.62460439637035	3.61710257795314	0.000297919259869069	0.00738571957682507	0	98	standard ATAC-Seq in frozen liver
peak_86576	chrX	96306460	96306894	434	5.63499819958641	5.87636075026521	1.62460439637035	3.61710257795314	0.000297919259869069	0.00738571957682507	1	68.5	standard ATAC-Seq in frozen liver
peak_87495	chrX	166579754	166580464	710	5.63499819958641	5.87636075026521	1.62460439637035	3.61710257795314	0.000297919259869069	0.00738571957682507	0	112.5	standard ATAC-Seq in frozen liver
peak_8886	chr10	83162173	83162395	222	5.63220364062999	5.8758376049223	1.62464834165066	3.61668273329377	0.000298402683116277	0.00738571957682507	0	34.5	standard ATAC-Seq in frozen liver
peak_18456	chr12	84574467	84574780	313	5.63220364062999	5.8758376049223	1.62464834165066	3.61668273329377	0.000298402683116277	0.00738571957682507	0	47	standard ATAC-Seq in frozen liver
peak_19323	chr12	107121154	107121444	290	5.63220364062999	5.8758376049223	1.62464834165066	3.61668273329377	0.000298402683116277	0.00738571957682507	0	45.5	standard ATAC-Seq in frozen liver
peak_22249	chr13	65576196	65576511	315	5.63220364062999	5.8758376049223	1.62464834165066	3.61668273329377	0.000298402683116277	0.00738571957682507	0	48.5	standard ATAC-Seq in frozen liver
peak_23975	chr14	7919651	7919908	257	5.63220364062999	5.8758376049223	1.62464834165066	3.61668273329377	0.000298402683116277	0.00738571957682507	0	38.5	standard ATAC-Seq in frozen liver
peak_33459	chr16	79944835	79945048	213	5.63220364062999	5.8758376049223	1.62464834165066	3.61668273329377	0.000298402683116277	0.00738571957682507	0	32.5	standard ATAC-Seq in frozen liver
peak_43212	chr1_random	553944	554144	200	5.63220364062999	5.8758376049223	1.62464834165066	3.61668273329377	0.000298402683116277	0.00738571957682507	0	31	standard ATAC-Seq in frozen liver
peak_46813	chr2	111702676	111702904	228	5.63220364062999	5.8758376049223	1.62464834165066	3.61668273329377	0.000298402683116277	0.00738571957682507	0	35	standard ATAC-Seq in frozen liver
peak_55943	chr4	60273835	60274176	341	5.63220364062999	5.8758376049223	1.62464834165066	3.61668273329377	0.000298402683116277	0.00738571957682507	0	53	standard ATAC-Seq in frozen liver
peak_55977	chr4	60854557	60854947	390	5.63220364062999	5.8758376049223	1.62464834165066	3.61668273329377	0.000298402683116277	0.00738571957682507	0	61.5	standard ATAC-Seq in frozen liver
peak_62801	chr5	104321383	104321583	200	5.63220364062999	5.8758376049223	1.62464834165066	3.61668273329377	0.000298402683116277	0.00738571957682507	0	31	standard ATAC-Seq in frozen liver
peak_67561	chr6	78167571	78167771	200	5.63220364062999	5.8758376049223	1.62464834165066	3.61668273329377	0.000298402683116277	0.00738571957682507	0	31.5	standard ATAC-Seq in frozen liver
peak_72313	chr7	54823817	54824148	331	5.63220364062999	5.8758376049223	1.62464834165066	3.61668273329377	0.000298402683116277	0.00738571957682507	0	51	standard ATAC-Seq in frozen liver
peak_78395	chr8	87662811	87663116	305	5.63220364062999	5.8758376049223	1.62464834165066	3.61668273329377	0.000298402683116277	0.00738571957682507	0	47.5	standard ATAC-Seq in frozen liver
peak_85124	chrUn_random	2370219	2370447	228	5.63220364062999	5.8758376049223	1.62464834165066	3.61668273329377	0.000298402683116277	0.00738571957682507	0	35	standard ATAC-Seq in frozen liver
peak_85760	chrX	30561257	30561513	256	5.63220364062999	5.8758376049223	1.62464834165066	3.61668273329377	0.000298402683116277	0.00738571957682507	0	39	standard ATAC-Seq in frozen liver
peak_317	chr1	21266204	21266595	391	5.63639547906461	5.87662406713599	1.6264681423458	3.61311968807476	0.000302534968047074	0.00744712794129849	1	60	standard ATAC-Seq in frozen liver
peak_19768	chr12	116533799	116534425	626	5.63639547906461	5.87662406713599	1.6264681423458	3.61311968807476	0.000302534968047074	0.00744712794129849	1	98.5	standard ATAC-Seq in frozen liver
peak_28253	chr15	39005541	39006206	665	5.63639547906461	5.87662406713599	1.6264681423458	3.61311968807476	0.000302534968047074	0.00744712794129849	0	105.5	standard ATAC-Seq in frozen liver
peak_38184	chr18	13454988	13455351	363	5.63639547906461	5.87662406713599	1.6264681423458	3.61311968807476	0.000302534968047074	0.00744712794129849	0	59	standard ATAC-Seq in frozen liver
peak_40436	chr18	90007863	90008335	472	5.63639547906461	5.87662406713599	1.6264681423458	3.61311968807476	0.000302534968047074	0.00744712794129849	0	73	standard ATAC-Seq in frozen liver
peak_59390	chr4	145858771	145858973	202	5.63639547906461	5.87662406713599	1.6264681423458	3.61311968807476	0.000302534968047074	0.00744712794129849	0	31	standard ATAC-Seq in frozen liver
peak_59417	chr4	146622154	146622354	200	5.63639547906461	5.87662406713599	1.6264681423458	3.61311968807476	0.000302534968047074	0.00744712794129849	0	30.5	standard ATAC-Seq in frozen liver
peak_77679	chr8	71945563	71945765	202	5.63639547906461	5.87662406713599	1.6264681423458	3.61311968807476	0.000302534968047074	0.00744712794129849	0	32.5	standard ATAC-Seq in frozen liver
peak_85337	chrX	3908004	3908204	200	5.63639547906461	5.87662406713599	1.6264681423458	3.61311968807476	0.000302534968047074	0.00744712794129849	0	32	standard ATAC-Seq in frozen liver
peak_85340	chrX	4111880	4112080	200	5.63639547906461	5.87662406713599	1.6264681423458	3.61311968807476	0.000302534968047074	0.00744712794129849	0	31.5	standard ATAC-Seq in frozen liver
peak_87154	chrX	144403921	144404144	223	5.63639547906461	5.87662406713599	1.6264681423458	3.61311968807476	0.000302534968047074	0.00744712794129849	0	34.5	standard ATAC-Seq in frozen liver
peak_17465	chr12	55875309	55875582	273	5.63080636115179	5.87557414917722	1.62655749296669	3.61227572623991	0.000303521582360535	0.00744712794129849	0	42	standard ATAC-Seq in frozen liver
peak_18125	chr12	79374925	79375386	461	5.63080636115179	5.87557414917722	1.62655749296669	3.61227572623991	0.000303521582360535	0.00744712794129849	1	71.5	standard ATAC-Seq in frozen liver
peak_19785	chr12	116642817	116643072	255	5.63080636115179	5.87557414917722	1.62655749296669	3.61227572623991	0.000303521582360535	0.00744712794129849	0	38.5	standard ATAC-Seq in frozen liver
peak_20180	chr13	12835755	12835960	205	5.63080636115179	5.87557414917722	1.62655749296669	3.61227572623991	0.000303521582360535	0.00744712794129849	0	31	standard ATAC-Seq in frozen liver
peak_23951	chr14	4350532	4350756	224	5.63080636115179	5.87557414917722	1.62655749296669	3.61227572623991	0.000303521582360535	0.00744712794129849	0	34.5	standard ATAC-Seq in frozen liver
peak_34331	chr17	6889749	6889963	214	5.63080636115179	5.87557414917722	1.62655749296669	3.61227572623991	0.000303521582360535	0.00744712794129849	0	32.5	standard ATAC-Seq in frozen liver
peak_35883	chr17	36304462	36304662	200	5.63080636115179	5.87557414917722	1.62655749296669	3.61227572623991	0.000303521582360535	0.00744712794129849	0	30	standard ATAC-Seq in frozen liver
peak_54405	chr4	3588722	3588951	229	5.63080636115179	5.87557414917722	1.62655749296669	3.61227572623991	0.000303521582360535	0.00744712794129849	0	34.5	standard ATAC-Seq in frozen liver
peak_59408	chr4	146405484	146405752	268	5.63080636115179	5.87557414917722	1.62655749296669	3.61227572623991	0.000303521582360535	0.00744712794129849	0	40	standard ATAC-Seq in frozen liver
peak_60340	chr5	19633035	19633263	228	5.63080636115179	5.87557414917722	1.62655749296669	3.61227572623991	0.000303521582360535	0.00744712794129849	0	36	standard ATAC-Seq in frozen liver
peak_64848	chr5	143276751	143277337	586	5.63080636115179	5.87557414917722	1.62655749296669	3.61227572623991	0.000303521582360535	0.00744712794129849	0	91	standard ATAC-Seq in frozen liver
peak_74067	chr7	111923322	111923578	256	5.63080636115179	5.87557414917722	1.62655749296669	3.61227572623991	0.000303521582360535	0.00744712794129849	0	38.5	standard ATAC-Seq in frozen liver
peak_85273	chrUn_random	5262744	5263322	578	5.63080636115179	5.87557414917722	1.62655749296669	3.61227572623991	0.000303521582360535	0.00744712794129849	0	89.5	standard ATAC-Seq in frozen liver
peak_2204	chr1	89939662	89939889	227	10.6649041385398	3.2058080803319	0.888815502001294	3.60683187130914	0.000309958352630706	0.00758401653313091	4	59.5	standard ATAC-Seq in frozen liver
peak_15257	chr11	107060604	107060833	229	5.63779275854282	5.87689092852671	1.62964298513624	3.60624442416472	0.000310660533955762	0.00758401653313091	0	35.5	standard ATAC-Seq in frozen liver
peak_22238	chr13	65481596	65482131	535	5.63779275854282	5.87689092852671	1.62964298513624	3.60624442416472	0.000310660533955762	0.00758401653313091	0	85	standard ATAC-Seq in frozen liver
peak_22288	chr13	66083825	66084069	244	5.63779275854282	5.87689092852671	1.62964298513624	3.60624442416472	0.000310660533955762	0.00758401653313091	0	37.5	standard ATAC-Seq in frozen liver
peak_34155	chr17	3033756	3033987	231	5.63779275854282	5.87689092852671	1.62964298513624	3.60624442416472	0.000310660533955762	0.00758401653313091	0	36	standard ATAC-Seq in frozen liver
peak_57444	chr4	111676682	111676957	275	5.63779275854282	5.87689092852671	1.62964298513624	3.60624442416472	0.000310660533955762	0.00758401653313091	0	43.5	standard ATAC-Seq in frozen liver
peak_68892	chr6	114571429	114571714	285	5.63779275854282	5.87689092852671	1.62964298513624	3.60624442416472	0.000310660533955762	0.00758401653313091	0	46	standard ATAC-Seq in frozen liver
peak_86187	chrX	64653898	64654113	215	5.63779275854282	5.87689092852671	1.62964298513624	3.60624442416472	0.000310660533955762	0.00758401653313091	0	34.5	standard ATAC-Seq in frozen liver
peak_86198	chrX	67627654	67627922	268	5.63779275854282	5.87689092852671	1.62964298513624	3.60624442416472	0.000310660533955762	0.00758401653313091	0	42	standard ATAC-Seq in frozen liver
peak_86514	chrX	92173647	92173937	290	5.63779275854282	5.87689092852671	1.62964298513624	3.60624442416472	0.000310660533955762	0.00758401653313091	0	45	standard ATAC-Seq in frozen liver
peak_63054	chr5	110503377	110503707	330	11.9975670115304	5.49258769855868	1.52345876311562	3.60534057864867	0.000311743818565179	0.00759832802784485	1	105.5	standard ATAC-Seq in frozen liver
peak_17490	chr12	56343072	56343488	416	5.62940908167358	5.87530704588824	1.6297806747968	3.60496791791985	0.000312191491921143	0.00759832802784485	0	65.5	standard ATAC-Seq in frozen liver
peak_19856	chr12	117246406	117246660	254	5.62940908167358	5.87530704588824	1.6297806747968	3.60496791791985	0.000312191491921143	0.00759832802784485	0	38.5	standard ATAC-Seq in frozen liver
peak_30025	chr15	85008020	85008379	359	5.62940908167358	5.87530704588824	1.6297806747968	3.60496791791985	0.000312191491921143	0.00759832802784485	1	53.5	standard ATAC-Seq in frozen liver
peak_37748	chr17_random	22018	22354	336	5.62940908167358	5.87530704588824	1.6297806747968	3.60496791791985	0.000312191491921143	0.00759832802784485	0	53.5	standard ATAC-Seq in frozen liver
peak_40642	chr19	4818735	4818964	229	5.62940908167358	5.87530704588824	1.6297806747968	3.60496791791985	0.000312191491921143	0.00759832802784485	0	35	standard ATAC-Seq in frozen liver
peak_43217	chr1_random	717027	717324	297	5.62940908167358	5.87530704588824	1.6297806747968	3.60496791791985	0.000312191491921143	0.00759832802784485	0	44.5	standard ATAC-Seq in frozen liver
peak_85264	chrUn_random	5172786	5173087	301	11.9933751730958	5.49222282188403	1.52383266786357	3.60421648499254	0.000313096011266547	0.00761001488426993	1	98	standard ATAC-Seq in frozen liver
peak_19813	chr12	116859609	116859890	281	11.9958387857284	5.49190409894539	1.52375150601561	3.60419929185562	0.000313116735774586	0.00761001488426993	1	90	standard ATAC-Seq in frozen liver
peak_85246	chrUn_random	4767700	4768031	331	12.0028251831194	5.49251325742454	1.52450391963492	3.60282002996743	0.000314783480454561	0.00763798564776331	1	107.5	standard ATAC-Seq in frozen liver
peak_56011	chr4	61258813	61259136	323	5.63919003802103	5.87716304740771	1.63420717427457	3.59633903211604	0.000322727131034264	0.00780026395498144	0	51.5	standard ATAC-Seq in frozen liver
peak_70809	chr7	10870290	10870555	265	5.62801180219537	5.87503456858266	1.63439857302708	3.59461557635936	0.000324870906081892	0.00784125119398266	0	41	standard ATAC-Seq in frozen liver
peak_20186	chr13	13529548	13530222	674	9.93766447250608	3.54946436608622	0.990393860039062	3.58389173166545	0.000338512448215152	0.00811678656310737	14	171.5	standard ATAC-Seq in frozen liver
peak_19847	chr12	117168145	117168345	200	5.64058731749923	5.8774419980179	1.64026382600194	3.58322966394002	0.000339371971882111	0.00812619198251831	0	31.5	standard ATAC-Seq in frozen liver
peak_22274	chr13	65805708	65806009	301	5.64058731749923	5.8774419980179	1.64026382600194	3.58322966394002	0.000339371971882111	0.00812619198251831	0	47.5	standard ATAC-Seq in frozen liver
peak_72031	chr7	48476349	48476554	205	5.64058731749923	5.8774419980179	1.64026382600194	3.58322966394002	0.000339371971882111	0.00812619198251831	0	32	standard ATAC-Seq in frozen liver
peak_85765	chrX	30805295	30805564	269	5.64058731749923	5.8774419980179	1.64026382600194	3.58322966394002	0.000339371971882111	0.00812619198251831	0	41.5	standard ATAC-Seq in frozen liver
peak_80521	chr8_random	162260	162490	230	11.7632013332745	5.46293827863556	1.52461442678877	3.58316055695598	0.000339461807014328	0.00812619198251831	1.5	74	standard ATAC-Seq in frozen liver
peak_65833	chr6	23107417	23107808	391	9.67676604453441	4.13394766953438	1.15374975224991	3.58305400410515	0.000339600363232967	0.008126450306256	5	98.5	standard ATAC-Seq in frozen liver
peak_20561	chr13	25107131	25107468	337	11.7635322795983	5.46350865991574	1.52500670908492	3.58261286810608	0.000340174558498709	0.00813419504171573	1.5	108	standard ATAC-Seq in frozen liver
peak_23167	chr13	100560780	100561129	349	11.7659958922309	5.46318584148544	1.52492460406663	3.58259406853057	0.000340199048732351	0.00813419504171573	2	110.5	standard ATAC-Seq in frozen liver
peak_85357	chrX	4666227	4666429	202	11.7593404411637	5.46313600414875	1.5249680915606	3.5824592228405	0.000340374760758503	0.00813469652835157	1.5	64.5	standard ATAC-Seq in frozen liver
peak_87065	chrX	137584853	137585224	371	9.673971485578	4.13364361315426	1.15427416111387	3.58116273621279	0.000342068498588016	0.0081707131353506	5	95	standard ATAC-Seq in frozen liver
peak_60219	chr5	14957178	14957378	200	11.7701877306655	5.46355830867481	1.52755477170394	3.5766693344687	0.000347999920151376	0.00828525707609582	1	64.5	standard ATAC-Seq in frozen liver
peak_65633	chr6	14071353	14071553	200	11.7576122153617	5.46242879255957	1.52743925064311	3.57620035641985	0.000348624498572364	0.00829561378209754	1	62.5	standard ATAC-Seq in frozen liver
peak_30996	chr16	3247196	3247427	231	9.94045903146249	3.54977895902633	0.99369272795664	3.57231049312985	0.000353845527225479	0.00840385527740752	3	59	standard ATAC-Seq in frozen liver
peak_60217	chr5	14947242	14947486	244	11.7523540437727	5.46250856084327	1.53075675429581	3.5685020141271	0.000359028094341425	0.00851308040874213	1	76.5	standard ATAC-Seq in frozen liver
peak_11626	chr11	34444699	34445048	349	11.5267029887099	5.43357668090267	1.52605763209818	3.56053176932252	0.000370104528271797	0.00871902509012635	1	109	standard ATAC-Seq in frozen liver
peak_60226	chr5	14973333	14973792	459	11.5281002681881	5.43370355419375	1.52621846381426	3.56023969243177	0.000370516439468295	0.00872638005000691	2	141	standard ATAC-Seq in frozen liver
peak_60270	chr5	15185413	15186145	732	11.5294975476663	5.43383155963844	1.52667597774012	3.55925660642277	0.00037190602050109	0.00875038001379956	3	226.5	standard ATAC-Seq in frozen liver
peak_19291	chr12	106674226	106674543	317	11.5319611602988	5.43350247522232	1.52659241581812	3.55923586343146	0.000371935392901363	0.00875038001379956	1	99	standard ATAC-Seq in frozen liver
peak_56650	chr4	93510968	93511321	353	11.5239084297534	5.43332441681181	1.52662379300262	3.5590460739023	0.000372204238556798	0.00875055226645284	3	109.5	standard ATAC-Seq in frozen liver
peak_80574	chr8_random	847445	847751	306	11.526372042386	5.43299560455044	1.5265402852279	3.55902537071883	0.000372233576561662	0.00875055226645284	1	94.5	standard ATAC-Seq in frozen liver
peak_19157	chr12	105008025	105008299	274	9.67224325977594	4.13242332973482	1.16197778090603	3.55637035203257	0.000376013909204851	0.00881436999113877	3	67.5	standard ATAC-Seq in frozen liver
peak_8446	chr10	77484333	77484753	420	5.39956618817613	5.81483607518301	1.6361808188666	3.55390798384437	0.000379551985571003	0.00881436999113877	0	61	standard ATAC-Seq in frozen liver
peak_10904	chr11	5454427	5454879	452	5.39956618817613	5.81483607518301	1.6361808188666	3.55390798384437	0.000379551985571003	0.00881436999113877	0	68	standard ATAC-Seq in frozen liver
peak_17467	chr12	55883558	55883864	306	5.39956618817613	5.81483607518301	1.6361808188666	3.55390798384437	0.000379551985571003	0.00881436999113877	0	45.5	standard ATAC-Seq in frozen liver
peak_19751	chr12	116388134	116388438	304	5.39956618817613	5.81483607518301	1.6361808188666	3.55390798384437	0.000379551985571003	0.00881436999113877	0	46	standard ATAC-Seq in frozen liver
peak_22316	chr13	66560555	66560899	344	5.39956618817613	5.81483607518301	1.6361808188666	3.55390798384437	0.000379551985571003	0.00881436999113877	0	53	standard ATAC-Seq in frozen liver
peak_50184	chr3	24232089	24232328	239	5.39956618817613	5.81483607518301	1.6361808188666	3.55390798384437	0.000379551985571003	0.00881436999113877	0	35	standard ATAC-Seq in frozen liver
peak_51490	chr3	79818760	79818960	200	5.39956618817613	5.81483607518301	1.6361808188666	3.55390798384437	0.000379551985571003	0.00881436999113877	0	29.5	standard ATAC-Seq in frozen liver
peak_54919	chr4	32443725	32443989	264	5.39956618817613	5.81483607518301	1.6361808188666	3.55390798384437	0.000379551985571003	0.00881436999113877	0	39	standard ATAC-Seq in frozen liver
peak_59374	chr4	145296065	145296461	396	5.39956618817613	5.81483607518301	1.6361808188666	3.55390798384437	0.000379551985571003	0.00881436999113877	0	58	standard ATAC-Seq in frozen liver
peak_59422	chr4	146687023	146687223	200	5.39956618817613	5.81483607518301	1.6361808188666	3.55390798384437	0.000379551985571003	0.00881436999113877	0	30	standard ATAC-Seq in frozen liver
peak_59618	chr4	149184305	149184842	537	5.39956618817613	5.81483607518301	1.6361808188666	3.55390798384437	0.000379551985571003	0.00881436999113877	0	79.5	standard ATAC-Seq in frozen liver
peak_65432	chr6	4127749	4127997	248	5.39956618817613	5.81483607518301	1.6361808188666	3.55390798384437	0.000379551985571003	0.00881436999113877	0	36.5	standard ATAC-Seq in frozen liver
peak_67284	chr6	67623353	67623684	331	5.39956618817613	5.81483607518301	1.6361808188666	3.55390798384437	0.000379551985571003	0.00881436999113877	0	50	standard ATAC-Seq in frozen liver
peak_68309	chr6	94540959	94541159	200	5.39956618817613	5.81483607518301	1.6361808188666	3.55390798384437	0.000379551985571003	0.00881436999113877	0	29.5	standard ATAC-Seq in frozen liver
peak_70322	chr6	142905461	142905888	427	5.39956618817613	5.81483607518301	1.6361808188666	3.55390798384437	0.000379551985571003	0.00881436999113877	0	64	standard ATAC-Seq in frozen liver
peak_71512	chr7	29043202	29043583	381	5.39956618817613	5.81483607518301	1.6361808188666	3.55390798384437	0.000379551985571003	0.00881436999113877	2	56.5	standard ATAC-Seq in frozen liver
peak_76401	chr8	22090083	22090363	280	5.39956618817613	5.81483607518301	1.6361808188666	3.55390798384437	0.000379551985571003	0.00881436999113877	0	42.5	standard ATAC-Seq in frozen liver
peak_83653	chr9	88717420	88717790	370	5.39956618817613	5.81483607518301	1.6361808188666	3.55390798384437	0.000379551985571003	0.00881436999113877	0	55.5	standard ATAC-Seq in frozen liver
peak_86110	chrX	52187300	52187974	674	5.39956618817613	5.81483607518301	1.6361808188666	3.55390798384437	0.000379551985571003	0.00881436999113877	0	100	standard ATAC-Seq in frozen liver
peak_16798	chr12	22873477	22873696	219	5.39816890869792	5.81456115847175	1.63620917826539	3.55367836564515	0.000379883495882147	0.00881436999113877	0	32.5	standard ATAC-Seq in frozen liver
peak_19825	chr12	116982615	116982842	227	5.39816890869792	5.81456115847175	1.63620917826539	3.55367836564515	0.000379883495882147	0.00881436999113877	0	34.5	standard ATAC-Seq in frozen liver
peak_23971	chr14	7721260	7721603	343	5.39816890869792	5.81456115847175	1.63620917826539	3.55367836564515	0.000379883495882147	0.00881436999113877	0	51	standard ATAC-Seq in frozen liver
peak_29297	chr15	75933561	75934798	1237	5.39816890869792	5.81456115847175	1.63620917826539	3.55367836564515	0.000379883495882147	0.00881436999113877	2	179.5	standard ATAC-Seq in frozen liver
peak_55994	chr4	61101393	61101700	307	5.39816890869792	5.81456115847175	1.63620917826539	3.55367836564515	0.000379883495882147	0.00881436999113877	0	45	standard ATAC-Seq in frozen liver
peak_66789	chr6	50571181	50571414	233	5.39816890869792	5.81456115847175	1.63620917826539	3.55367836564515	0.000379883495882147	0.00881436999113877	0	35	standard ATAC-Seq in frozen liver
peak_68894	chr6	114584428	114584674	246	5.39816890869792	5.81456115847175	1.63620917826539	3.55367836564515	0.000379883495882147	0.00881436999113877	0	36.5	standard ATAC-Seq in frozen liver
peak_69805	chr6	130811797	130812012	215	5.39816890869792	5.81456115847175	1.63620917826539	3.55367836564515	0.000379883495882147	0.00881436999113877	0.5	32	standard ATAC-Seq in frozen liver
peak_69834	chr6	133119835	133120188	353	5.39816890869792	5.81456115847175	1.63620917826539	3.55367836564515	0.000379883495882147	0.00881436999113877	1	52.5	standard ATAC-Seq in frozen liver
peak_69991	chr6	136354510	136354763	253	5.39816890869792	5.81456115847175	1.63620917826539	3.55367836564515	0.000379883495882147	0.00881436999113877	0	39	standard ATAC-Seq in frozen liver
peak_77682	chr8	71978223	71978600	377	5.39816890869792	5.81456115847175	1.63620917826539	3.55367836564515	0.000379883495882147	0.00881436999113877	0	56	standard ATAC-Seq in frozen liver
peak_77694	chr8	72098743	72099018	275	5.39816890869792	5.81456115847175	1.63620917826539	3.55367836564515	0.000379883495882147	0.00881436999113877	0	41	standard ATAC-Seq in frozen liver
peak_83652	chr9	88649203	88649554	351	5.39816890869792	5.81456115847175	1.63620917826539	3.55367836564515	0.000379883495882147	0.00881436999113877	0	53.5	standard ATAC-Seq in frozen liver
peak_85134	chrUn_random	2418781	2419311	530	5.39816890869792	5.81456115847175	1.63620917826539	3.55367836564515	0.000379883495882147	0.00881436999113877	0	79	standard ATAC-Seq in frozen liver
peak_85166	chrUn_random	3479532	3479773	241	5.39816890869792	5.81456115847175	1.63620917826539	3.55367836564515	0.000379883495882147	0.00881436999113877	0	35.5	standard ATAC-Seq in frozen liver
peak_87507	chrY_random	12197269	12197476	207	5.39816890869792	5.81456115847175	1.63620917826539	3.55367836564515	0.000379883495882147	0.00881436999113877	0	31	standard ATAC-Seq in frozen liver
peak_16710	chr12	19214806	19215094	288	5.40096346765434	5.81511189714382	1.63753219035818	3.55114356309042	0.000383561134820965	0.00881436999113877	0	43.5	standard ATAC-Seq in frozen liver
peak_16804	chr12	24282717	24283009	292	5.40096346765434	5.81511189714382	1.63753219035818	3.55114356309042	0.000383561134820965	0.00881436999113877	0	44	standard ATAC-Seq in frozen liver
peak_22076	chr13	61626935	61627394	459	5.40096346765434	5.81511189714382	1.63753219035818	3.55114356309042	0.000383561134820965	0.00881436999113877	0	67.5	standard ATAC-Seq in frozen liver
peak_22239	chr13	65482380	65482702	322	5.40096346765434	5.81511189714382	1.63753219035818	3.55114356309042	0.000383561134820965	0.00881436999113877	0	49	standard ATAC-Seq in frozen liver
peak_22242	chr13	65521511	65521801	290	5.40096346765434	5.81511189714382	1.63753219035818	3.55114356309042	0.000383561134820965	0.00881436999113877	0	44	standard ATAC-Seq in frozen liver
peak_22319	chr13	66582992	66583230	238	5.40096346765434	5.81511189714382	1.63753219035818	3.55114356309042	0.000383561134820965	0.00881436999113877	0	35	standard ATAC-Seq in frozen liver
peak_22324	chr13	66622082	66622322	240	5.40096346765434	5.81511189714382	1.63753219035818	3.55114356309042	0.000383561134820965	0.00881436999113877	0	35.5	standard ATAC-Seq in frozen liver
peak_23956	chr14	5071848	5072468	620	5.40096346765434	5.81511189714382	1.63753219035818	3.55114356309042	0.000383561134820965	0.00881436999113877	0	95.5	standard ATAC-Seq in frozen liver
peak_24613	chr14	26777416	26777653	237	5.40096346765434	5.81511189714382	1.63753219035818	3.55114356309042	0.000383561134820965	0.00881436999113877	0	36	standard ATAC-Seq in frozen liver
peak_25185	chr14	43398591	43398791	200	5.40096346765434	5.81511189714382	1.63753219035818	3.55114356309042	0.000383561134820965	0.00881436999113877	0	29	standard ATAC-Seq in frozen liver
peak_29344	chr15	76390627	76390827	200	5.40096346765434	5.81511189714382	1.63753219035818	3.55114356309042	0.000383561134820965	0.00881436999113877	0	29.5	standard ATAC-Seq in frozen liver
peak_48960	chr2	164514568	164514838	270	5.40096346765434	5.81511189714382	1.63753219035818	3.55114356309042	0.000383561134820965	0.00881436999113877	0	39.5	standard ATAC-Seq in frozen liver
peak_55450	chr4	46596692	46596892	200	5.40096346765434	5.81511189714382	1.63753219035818	3.55114356309042	0.000383561134820965	0.00881436999113877	0	31	standard ATAC-Seq in frozen liver
peak_56335	chr4	78449560	78449776	216	5.40096346765434	5.81511189714382	1.63753219035818	3.55114356309042	0.000383561134820965	0.00881436999113877	0	32.5	standard ATAC-Seq in frozen liver
peak_59412	chr4	146515990	146516342	352	5.40096346765434	5.81511189714382	1.63753219035818	3.55114356309042	0.000383561134820965	0.00881436999113877	0	52.5	standard ATAC-Seq in frozen liver
peak_60301	chr5	16973981	16974274	293	5.40096346765434	5.81511189714382	1.63753219035818	3.55114356309042	0.000383561134820965	0.00881436999113877	0	44.5	standard ATAC-Seq in frozen liver
peak_60467	chr5	23722276	23722487	211	5.40096346765434	5.81511189714382	1.63753219035818	3.55114356309042	0.000383561134820965	0.00881436999113877	0	32.5	standard ATAC-Seq in frozen liver
peak_61035	chr5	37052059	37052297	238	5.40096346765434	5.81511189714382	1.63753219035818	3.55114356309042	0.000383561134820965	0.00881436999113877	0	36	standard ATAC-Seq in frozen liver
peak_61210	chr5	44526874	44527084	210	5.40096346765434	5.81511189714382	1.63753219035818	3.55114356309042	0.000383561134820965	0.00881436999113877	0	31	standard ATAC-Seq in frozen liver
peak_63047	chr5	110329669	110330178	509	5.40096346765434	5.81511189714382	1.63753219035818	3.55114356309042	0.000383561134820965	0.00881436999113877	0	75.5	standard ATAC-Seq in frozen liver
peak_66536	chr6	40821945	40822183	238	5.40096346765434	5.81511189714382	1.63753219035818	3.55114356309042	0.000383561134820965	0.00881436999113877	0.5	35.5	standard ATAC-Seq in frozen liver
peak_67549	chr6	73243773	73244025	252	5.40096346765434	5.81511189714382	1.63753219035818	3.55114356309042	0.000383561134820965	0.00881436999113877	0	36.5	standard ATAC-Seq in frozen liver
peak_68577	chr6	100412915	100413175	260	5.40096346765434	5.81511189714382	1.63753219035818	3.55114356309042	0.000383561134820965	0.00881436999113877	0	39	standard ATAC-Seq in frozen liver
peak_72421	chr7	58195718	58195997	279	5.40096346765434	5.81511189714382	1.63753219035818	3.55114356309042	0.000383561134820965	0.00881436999113877	0	41.5	standard ATAC-Seq in frozen liver
peak_85121	chrUn_random	701347	701670	323	5.40096346765434	5.81511189714382	1.63753219035818	3.55114356309042	0.000383561134820965	0.00881436999113877	0	50	standard ATAC-Seq in frozen liver
peak_85773	chrX	31320847	31321047	200	5.40096346765434	5.81511189714382	1.63753219035818	3.55114356309042	0.000383561134820965	0.00881436999113877	0	29.5	standard ATAC-Seq in frozen liver
peak_20225	chr13	14649944	14650188	244	5.39677162921972	5.81428522199819	1.63761813269673	3.55045239540893	0.000384569679311502	0.00881436999113877	0	36	standard ATAC-Seq in frozen liver
peak_20956	chr13	37070357	37070830	473	5.39677162921972	5.81428522199819	1.63761813269673	3.55045239540893	0.000384569679311502	0.00881436999113877	0	70.5	standard ATAC-Seq in frozen liver
peak_22283	chr13	66002535	66002890	355	5.39677162921972	5.81428522199819	1.63761813269673	3.55045239540893	0.000384569679311502	0.00881436999113877	0	52	standard ATAC-Seq in frozen liver
peak_22323	chr13	66621358	66621604	246	5.39677162921972	5.81428522199819	1.63761813269673	3.55045239540893	0.000384569679311502	0.00881436999113877	0	36	standard ATAC-Seq in frozen liver
peak_23143	chr13	99756647	99756914	267	5.39677162921972	5.81428522199819	1.63761813269673	3.55045239540893	0.000384569679311502	0.00881436999113877	0	40	standard ATAC-Seq in frozen liver
peak_23921	chr13_random	113080	113716	636	5.39677162921972	5.81428522199819	1.63761813269673	3.55045239540893	0.000384569679311502	0.00881436999113877	0	95	standard ATAC-Seq in frozen liver
peak_25211	chr14	44188408	44188623	215	5.39677162921972	5.81428522199819	1.63761813269673	3.55045239540893	0.000384569679311502	0.00881436999113877	0	32	standard ATAC-Seq in frozen liver
peak_54380	chr4	3075031	3075398	367	5.39677162921972	5.81428522199819	1.63761813269673	3.55045239540893	0.000384569679311502	0.00881436999113877	0	53	standard ATAC-Seq in frozen liver
peak_55998	chr4	61117266	61117664	398	5.39677162921972	5.81428522199819	1.63761813269673	3.55045239540893	0.000384569679311502	0.00881436999113877	0	61	standard ATAC-Seq in frozen liver
peak_57433	chr4	111245851	111246076	225	5.39677162921972	5.81428522199819	1.63761813269673	3.55045239540893	0.000384569679311502	0.00881436999113877	0	33	standard ATAC-Seq in frozen liver
peak_60031	chr4_random	10138	10434	296	5.39677162921972	5.81428522199819	1.63761813269673	3.55045239540893	0.000384569679311502	0.00881436999113877	0	45.5	standard ATAC-Seq in frozen liver
peak_65398	chr6	3141742	3142020	278	5.39677162921972	5.81428522199819	1.63761813269673	3.55045239540893	0.000384569679311502	0.00881436999113877	0	40.5	standard ATAC-Seq in frozen liver
peak_69812	chr6	130915234	130915517	283	5.39677162921972	5.81428522199819	1.63761813269673	3.55045239540893	0.000384569679311502	0.00881436999113877	0	41.5	standard ATAC-Seq in frozen liver
peak_78955	chr8	107410346	107411398	1052	5.39677162921972	5.81428522199819	1.63761813269673	3.55045239540893	0.000384569679311502	0.00881436999113877	0	155	standard ATAC-Seq in frozen liver
peak_16802	chr12	22976860	22977124	264	5.40236074713254	5.81539057414027	1.64030081771683	3.54531956049064	0.000392137365099496	0.0089560203695571	0	41	standard ATAC-Seq in frozen liver
peak_34154	chr17	3029922	3030276	354	5.40236074713254	5.81539057414027	1.64030081771683	3.54531956049064	0.000392137365099496	0.0089560203695571	0	53	standard ATAC-Seq in frozen liver
peak_59411	chr4	146506056	146506306	250	5.40236074713254	5.81539057414027	1.64030081771683	3.54531956049064	0.000392137365099496	0.0089560203695571	0	37.5	standard ATAC-Seq in frozen liver
peak_71979	chr7	46597297	46597538	241	5.40236074713254	5.81539057414027	1.64030081771683	3.54531956049064	0.000392137365099496	0.0089560203695571	0	35.5	standard ATAC-Seq in frozen liver
peak_77956	chr8	74750425	74750782	357	5.40236074713254	5.81539057414027	1.64030081771683	3.54531956049064	0.000392137365099496	0.0089560203695571	0	54	standard ATAC-Seq in frozen liver
peak_85757	chrX	30445663	30446114	451	5.40236074713254	5.81539057414027	1.64030081771683	3.54531956049064	0.000392137365099496	0.0089560203695571	0	68	standard ATAC-Seq in frozen liver
peak_11061	chr11	10341543	10341786	243	5.39537434974151	5.81400633202621	1.64044694660816	3.54415992790711	0.0003938662521255	0.00896428779772986	0	34.5	standard ATAC-Seq in frozen liver
peak_12120	chr11	52557475	52557755	280	5.39537434974151	5.81400633202621	1.64044694660816	3.54415992790711	0.0003938662521255	0.00896428779772986	0	40.5	standard ATAC-Seq in frozen liver
peak_25173	chr14	42795278	42795657	379	5.39537434974151	5.81400633202621	1.64044694660816	3.54415992790711	0.0003938662521255	0.00896428779772986	0	56	standard ATAC-Seq in frozen liver
peak_25208	chr14	44170840	44171069	229	5.39537434974151	5.81400633202621	1.64044694660816	3.54415992790711	0.0003938662521255	0.00896428779772986	0	34	standard ATAC-Seq in frozen liver
peak_34287	chr17	5868324	5868717	393	5.39537434974151	5.81400633202621	1.64044694660816	3.54415992790711	0.0003938662521255	0.00896428779772986	0	58	standard ATAC-Seq in frozen liver
peak_59420	chr4	146654382	146654698	316	5.39537434974151	5.81400633202621	1.64044694660816	3.54415992790711	0.0003938662521255	0.00896428779772986	0	45.5	standard ATAC-Seq in frozen liver
peak_69039	chr6	116498883	116499203	320	5.39537434974151	5.81400633202621	1.64044694660816	3.54415992790711	0.0003938662521255	0.00896428779772986	0	46.5	standard ATAC-Seq in frozen liver
peak_76197	chr8	13070472	13070672	200	5.39537434974151	5.81400633202621	1.64044694660816	3.54415992790711	0.0003938662521255	0.00896428779772986	0	30.5	standard ATAC-Seq in frozen liver
peak_80902	chr9	21059965	21060181	216	5.39537434974151	5.81400633202621	1.64044694660816	3.54415992790711	0.0003938662521255	0.00896428779772986	0	31.5	standard ATAC-Seq in frozen liver
peak_85277	chrUn_random	5323263	5323598	335	5.39537434974151	5.81400633202621	1.64044694660816	3.54415992790711	0.0003938662521255	0.00896428779772986	0	51	standard ATAC-Seq in frozen liver
peak_85301	chrUn_random	5566543	5566746	203	5.39537434974151	5.81400633202621	1.64044694660816	3.54415992790711	0.0003938662521255	0.00896428779772986	0	30.5	standard ATAC-Seq in frozen liver
peak_85777	chrX	31473889	31474104	215	5.39537434974151	5.81400633202621	1.64044694660816	3.54415992790711	0.0003938662521255	0.00896428779772986	0	32.5	standard ATAC-Seq in frozen liver
peak_7389	chr10	51864141	51864420	279	9.44133403312413	4.09639699251333	1.15635583187501	3.54250558486924	0.000396345030150393	0.00900511959858053	4	70	standard ATAC-Seq in frozen liver
peak_21235	chr13	42532122	42532322	200	11.2937345899321	5.40280956215536	1.52743328624582	3.537182023468	0.000404420838576345	0.0091521694464198	1	60.5	standard ATAC-Seq in frozen liver
peak_22292	chr13	66127976	66128197	221	5.40375802661075	5.81567383038253	1.64452974994328	3.53637496103863	0.000405658481785282	0.0091620192689977	0	34	standard ATAC-Seq in frozen liver
peak_25164	chr14	42561264	42561492	228	5.40375802661075	5.81567383038253	1.64452974994328	3.53637496103863	0.000405658481785282	0.0091620192689977	0	34	standard ATAC-Seq in frozen liver
peak_59361	chr4	145063524	145063724	200	5.40375802661075	5.81567383038253	1.64452974994328	3.53637496103863	0.000405658481785282	0.0091620192689977	0	30.5	standard ATAC-Seq in frozen liver
peak_59407	chr4	146395221	146395421	200	5.40375802661075	5.81567383038253	1.64452974994328	3.53637496103863	0.000405658481785282	0.0091620192689977	0	30	standard ATAC-Seq in frozen liver
peak_77680	chr8	71969533	71969842	309	5.40375802661075	5.81567383038253	1.64452974994328	3.53637496103863	0.000405658481785282	0.0091620192689977	0	45.5	standard ATAC-Seq in frozen liver
peak_19832	chr12	117060305	117060850	545	11.2979264283668	5.40319543941409	1.52839713604304	3.53520384983365	0.000407460692830885	0.00919669514066711	3	168.5	standard ATAC-Seq in frozen liver
peak_25189	chr14	43579621	43579843	222	5.3939770702633	5.81372263780928	1.64477880730183	3.53465317767949	0.000408310699251776	0.00919669514066711	0	32.5	standard ATAC-Seq in frozen liver
peak_43216	chr1_random	643058	643319	261	5.3939770702633	5.81372263780928	1.64477880730183	3.53465317767949	0.000408310699251776	0.00919669514066711	0	39	standard ATAC-Seq in frozen liver
peak_69986	chr6	136273369	136273697	328	5.3939770702633	5.81372263780928	1.64477880730183	3.53465317767949	0.000408310699251776	0.00919669514066711	0	48.5	standard ATAC-Seq in frozen liver
peak_72571	chr7	71635006	71635258	252	5.3939770702633	5.81372263780928	1.64477880730183	3.53465317767949	0.000408310699251776	0.00919669514066711	0	37.5	standard ATAC-Seq in frozen liver
peak_77393	chr8	57976788	57977122	334	5.3939770702633	5.81372263780928	1.64477880730183	3.53465317767949	0.000408310699251776	0.00919669514066711	0	48.5	standard ATAC-Seq in frozen liver
peak_77935	chr8	74352906	74353113	207	9.44552587155875	4.09686719298005	1.15906380354257	3.53463474612732	0.000408339178450336	0.00919669514066711	2.5	51	standard ATAC-Seq in frozen liver
peak_59377	chr4	145364410	145364751	341	9.44519492523491	4.09582608938305	1.1591653101061	3.53342707349321	0.000410209242073414	0.00922907523316789	3	83	standard ATAC-Seq in frozen liver
peak_60218	chr5	14947947	14948275	328	11.2968600952124	5.40366463029739	1.52942808457071	3.53312763431706	0.000410674155333972	0.00923709339475501	2	102.5	standard ATAC-Seq in frozen liver
peak_34347	chr17	7199806	7200433	627	9.70050423529374	3.51079146187472	0.993766875653896	3.53281191785008	0.000411164873915152	0.00924344685337276	10.5	156	standard ATAC-Seq in frozen liver
peak_85306	chrUn_random	5731653	5731951	298	11.3007209873232	5.40345433769655	1.530609013639	3.53026428666451	0.000415144748571594	0.0093042389885371	1	91	standard ATAC-Seq in frozen liver
peak_86932	chrX	131588476	131589018	542	9.44692315103696	4.09702765033021	1.16117919651029	3.52833366515959	0.000418184671155152	0.00936517508567752	4.5	137.5	standard ATAC-Seq in frozen liver
peak_19781	chr12	116631721	116631948	227	5.40515530608896	5.81596381979174	1.65051193514144	3.52373327084928	0.000425512358925898	0.00950495562553232	0	34	standard ATAC-Seq in frozen liver
peak_20181	chr13	12917197	12917412	215	5.40515530608896	5.81596381979174	1.65051193514144	3.52373327084928	0.000425512358925898	0.00950495562553232	0	32	standard ATAC-Seq in frozen liver
peak_25159	chr14	42469797	42470003	206	5.40515530608896	5.81596381979174	1.65051193514144	3.52373327084928	0.000425512358925898	0.00950495562553232	0	31.5	standard ATAC-Seq in frozen liver
peak_25197	chr14	43752304	43752538	234	5.39257979078509	5.81343221104071	1.65078593479481	3.52161481904273	0.000428926873672719	0.00956414039667839	0	34.5	standard ATAC-Seq in frozen liver
peak_52101	chr3	94046179	94046401	222	5.39257979078509	5.81343221104071	1.65078593479481	3.52161481904273	0.000428926873672719	0.00956414039667839	0	32.5	standard ATAC-Seq in frozen liver
peak_66759	chr6	50146910	50147113	203	5.39257979078509	5.81343221104071	1.65078593479481	3.52161481904273	0.000428926873672719	0.00956414039667839	0	30	standard ATAC-Seq in frozen liver
peak_65576	chr6	8680026	8680226	200	9.4444595384044	4.09778853263039	1.1643262951903	3.51945030319928	0.000432442044421384	0.00962780343060675	2	50	standard ATAC-Seq in frozen liver
peak_86450	chrX	86308952	86309175	223	11.0586335248457	5.37231313054679	1.52913045418811	3.51331249458322	0.000442556649938114	0.00981554109920044	1	66	standard ATAC-Seq in frozen liver
peak_6585	chr10	22081413	22081901	488	11.0583025785219	5.37171251326107	1.52901811839833	3.51317780255476	0.000442781067649805	0.00981554109920044	2.5	145.5	standard ATAC-Seq in frozen liver
peak_85262	chrUn_random	5168203	5168535	332	11.0583025785219	5.37171251326107	1.52901811839833	3.51317780255476	0.000442781067649805	0.00981554109920044	2	99	standard ATAC-Seq in frozen liver
peak_60271	chr5	15186441	15187179	738	11.0600308043239	5.37244638714477	1.52962465946366	3.51226449829107	0.000444305577857612	0.00984546774280453	6	221.5	standard ATAC-Seq in frozen liver
peak_19791	chr12	116686611	116686817	206	5.40655258556716	5.81626181911477	1.6581914377537	3.50759368712811	0.000452179102745055	0.00999602497932419	0	31.5	standard ATAC-Seq in frozen liver
				0
				0
				0
				0

## Sheet: README
Supplemental Table S1: Lst of differential accessible chromatin peaks between standard ATAC-Seq on FFPE mouse liver and standard ATAC-Seq on frozen mouse liver.
