# Supplementary material for: Profiling chromatin accessibility in formalin-fixed paraffin-embedded samples
Source: HighWire-hosted journal article supplement (doi:10.1101/gr.275269.121), 2021-07-14
Supplement: Supplemental_Table_S2.xlsx [file Supplemental_Table_S2.xlsx]

## Sheet: Supplemental_Table_S2
	chr	start	end	baseMean	log2FoldChange	lfcSE	stat	pvalue	padj	readcounts (standard ATAC-Seq in frozen kidney)	readcounts (standard ATAC in FFPE kidney)	Group
peak_11662	chr11	3049975	3050287	99.0037233091973	4.50295547581739	0.492842791664194	9.13669744587752	6.43886037184065e-20	6.05787300363883e-15	693.5	25.5	standard ATAC-Seq in frozen kidney
peak_50282	chr2	98503941	98504179	84.0977505233932	5.1193190356366	0.58523757074802	8.74742034947167	2.18285342655516e-18	1.02684699465295e-13	457	12.5	standard ATAC-Seq in frozen kidney
peak_11663	chr11	3052353	3052883	118.268564958681	3.86792128872446	0.446267317419885	8.66727438407775	4.42587488561874e-18	1.38799862287889e-13	1375.5	76	standard ATAC-Seq in frozen kidney
peak_11670	chr11	3082208	3082558	89.4002923347099	3.93364009087115	0.456219964626219	8.62224452210015	6.56543214597731e-18	1.54423888147496e-13	688	36.5	standard ATAC-Seq in frozen kidney
peak_86987	chr9	3006663	3006904	71.5577991582359	4.87821484937157	0.575030308711459	8.48340474487821	2.18698264223434e-17	4.11515775858666e-13	390.5	10.5	standard ATAC-Seq in frozen kidney
peak_86995	chr9	3025358	3025949	75.017872996871	3.98957271598391	0.472621640079653	8.44136699985116	3.13647669172493e-17	4.91815227645927e-13	979	54	standard ATAC-Seq in frozen kidney
peak_86985	chr9	3001977	3002357	130.785784357688	4.37473215871599	0.519794937171169	8.41626542675498	3.88676126982242e-17	5.22397372212432e-13	1110	41.5	standard ATAC-Seq in frozen kidney
peak_11656	chr11	3035095	3035378	97.5250500302211	3.51556129803538	0.427283759709357	8.2276969768912	1.90847133299704e-16	2.23843431164784e-12	596	43	standard ATAC-Seq in frozen kidney
peak_11657	chr11	3036608	3036923	123.388386735998	3.55541536020137	0.43285383008806	8.21389372823165	2.14129107328961e-16	2.23843431164784e-12	840.5	59	standard ATAC-Seq in frozen kidney
peak_86984	chr9	2999998	3001585	60.8400253160155	4.63584976759739	0.570077117820946	8.1319695575879	4.22370904798964e-16	3.97379218362009e-12	2176	69	standard ATAC-Seq in frozen kidney
peak_86993	chr9	3023344	3023719	120.861538537375	3.70126476607056	0.463699229988426	7.98203776651288	1.43936971376379e-15	1.23109291618217e-11	987	61	standard ATAC-Seq in frozen kidney
peak_11653	chr11	3032109	3032468	97.134996281063	3.35883591905306	0.42528775415244	7.89779598932236	2.83878284937356e-15	2.2256767234801e-11	745	60.5	standard ATAC-Seq in frozen kidney
peak_11654	chr11	3032839	3033152	91.4417076392005	3.12423516126546	0.402079266475103	7.7701971271849	7.83640741939783e-15	5.46035828896086e-11	602.5	59.5	standard ATAC-Seq in frozen kidney
peak_86994	chr9	3024249	3024696	140.272142863042	4.02761568786844	0.518647640950242	7.76561073427275	8.12527407134679e-15	5.46035828896086e-11	1385	71	standard ATAC-Seq in frozen kidney
peak_46632	chr1_random	272406	273002	117.93254724536	3.246800052518	0.420734951991526	7.7169724957469	1.19125345047607e-14	7.47177989207602e-11	1492.5	132	standard ATAC-Seq in frozen kidney
peak_11655	chr11	3033177	3033831	79.4047480641114	3.13711817820132	0.407337842517953	7.70151419963651	1.34463229847542e-14	7.90669003359141e-11	1092	102.5	standard ATAC-Seq in frozen kidney
peak_11659	chr11	3042343	3043203	124.401169669869	3.12338646496642	0.418758895597961	7.45867490290904	8.73969493934777e-14	4.83680422928621e-10	2252.5	219	standard ATAC-Seq in frozen kidney
peak_11673	chr11	3096032	3096875	55.9852185125159	3.36065082684422	0.455547199748579	7.37717371262295	1.61684993389398e-13	8.45100512947484e-10	1008.5	79	standard ATAC-Seq in frozen kidney
peak_86991	chr9	3018345	3018677	51.6363664240978	5.26712660601793	0.716362233038054	7.35260230523367	1.94384647656027e-13	9.62541621337997e-10	392	7.5	standard ATAC-Seq in frozen kidney
peak_50378	chr2	102498814	102499329	64.3683483308394	3.02163327593214	0.413679776864621	7.30428085905924	2.7875357378192e-13	1.31129862410622e-09	691	71.5	standard ATAC-Seq in frozen kidney
peak_11666	chr11	3061254	3061614	182.127471650441	3.33052331502948	0.460666822928208	7.22978766705871	4.83749779802566e-13	2.06875593332567e-09	1398	115.5	standard ATAC-Seq in frozen kidney
peak_11674	chr11	3099016	3099352	41.9840135562673	3.91320229385838	0.556303837126051	7.03428959626553	2.0027876931355e-12	7.85117810555282e-09	310.5	17	standard ATAC-Seq in frozen kidney
peak_87909	chr9	35112647	35113297	264.54595695946	3.74993264521511	0.534371328682399	7.01746602771771	2.25928067777397e-12	8.50239616028035e-09	3754	229.5	standard ATAC-Seq in frozen kidney
peak_91791	chrUn_random	5495480	5497238	42.5622555138042	4.70831891546208	0.671490043024605	7.01174792444324	2.35358972021619e-12	8.51664544796537e-09	1692.5	51	standard ATAC-Seq in frozen kidney
peak_50377	chr2	102497872	102498137	57.0563229274665	3.01670504002916	0.43419797564786	6.94776394461072	3.71121289709247e-12	1.2931927518413e-08	315	31.5	standard ATAC-Seq in frozen kidney
peak_11675	chr11	3099528	3099768	41.1504781317405	4.65831687773721	0.679347731645669	6.85704339727873	7.0300280410144e-12	2.36216474350985e-08	222.5	8.5	standard ATAC-Seq in frozen kidney
peak_17412	chr12	3109727	3110255	447.562841013352	3.51161201354739	0.515298871012039	6.81470930966846	9.44545600559948e-12	3.06433392198212e-08	5098	368	standard ATAC-Seq in frozen kidney
peak_50379	chr2	102499919	102500394	43.0816248479938	3.21761723750206	0.482005535985499	6.6754777638049	2.46428028446372e-11	7.72822940010668e-08	433.5	39	standard ATAC-Seq in frozen kidney
peak_86996	chr9	3032308	3032904	47.8446082068422	5.90723829963357	0.890762015757484	6.63166838631998	3.31913606301596e-11	1.00733638134429e-07	655	9.5	standard ATAC-Seq in frozen kidney
peak_50376	chr2	102492016	102492595	45.5067453840972	3.02895527416034	0.457290435501803	6.62370134821767	3.50314192926347e-11	1.02995656915905e-07	550	55	standard ATAC-Seq in frozen kidney
peak_47279	chr2	22442767	22443815	38.615849511367	3.25573147996527	0.499571882545081	6.51704307972432	7.17068373421934e-11	1.98423364048988e-07	862.5	75	standard ATAC-Seq in frozen kidney
peak_50374	chr2	102489452	102490425	37.1755147834734	3.31358277428885	0.514075355120942	6.44571411813603	1.15057361983001e-10	3.09284051069906e-07	770.5	62	standard ATAC-Seq in frozen kidney
peak_82560	chr8	19927512	19927724	34.2981595535171	3.59987933631779	0.560257958118187	6.42539616645372	1.3152651944255e-10	3.43733598019816e-07	158	11	standard ATAC-Seq in frozen kidney
peak_86965	chr8_random	676770	677379	33.9059689862215	4.97405434741084	0.790416722955343	6.29295181004396	3.11485062433613e-10	7.51421772536964e-07	470	11.5	standard ATAC-Seq in frozen kidney
peak_91801	chrUn_random	5813073	5813462	31.3534372866315	4.52330057482155	0.726981570355009	6.22202922229882	4.90765597884406e-10	1.12616340843314e-06	275	9	standard ATAC-Seq in frozen kidney
peak_86998	chr9	3035699	3036186	37.3620341403156	5.54369907446595	0.892977251879551	6.20810783566714	5.36263497548487e-10	1.20126853904415e-06	417.5	8	standard ATAC-Seq in frozen kidney
peak_86992	chr9	3020833	3021121	53.1397316808044	9.11014212692698	1.47583065086736	6.17289126064218	6.70523305133843e-10	1.40188542482016e-06	358	0.5	standard ATAC-Seq in frozen kidney
peak_82578	chr8	20022776	20023020	34.4187189466486	3.07121931703604	0.503354693021426	6.1015013063667	1.05076781320796e-09	2.05957058687593e-06	175.5	18	standard ATAC-Seq in frozen kidney
peak_40837	chr18	3008515	3009025	34.1846337068069	3.06021063932818	0.503794209405363	6.07432674333474	1.24508981325844e-09	2.34283569801587e-06	365	36	standard ATAC-Seq in frozen kidney
peak_25799	chr13	120279080	120279388	29.3702159234439	3.52203727588854	0.588983518655291	5.97985710012686	2.23333453015317e-09	3.89108912222964e-06	195	14.5	standard ATAC-Seq in frozen kidney
peak_92655	chrX	72995622	72996223	25.1845697903271	-4.08868744384822	0.687165487028494	-5.95007683160705	2.68016646846215e-09	4.50282324736294e-06	21	280.5	standard ATAC in FFPE kidney
peak_82557	chr8	19919140	19919652	27.6244772015964	4.33218152454952	0.732568574908005	5.91368736379874	3.34532585681055e-09	5.52172443133872e-06	316.5	14.5	standard ATAC-Seq in frozen kidney
peak_82561	chr8	19929703	19930251	27.1640406315279	4.30638916386112	0.731720794910053	5.88529011860389	3.97356345421923e-09	6.44559949074668e-06	332	14	standard ATAC-Seq in frozen kidney
peak_86964	chr8_random	674672	676414	26.4985441340484	3.99074312603901	0.682058040804798	5.85103156518778	4.88533489188905e-09	7.79028750226436e-06	1021.5	53	standard ATAC-Seq in frozen kidney
peak_36938	chr17	3077779	3078023	31.3479894160791	3.04044475281744	0.521672985986694	5.8282579978082	5.60089430309267e-09	8.78248231196446e-06	160	16	standard ATAC-Seq in frozen kidney
peak_93883	chrY_random	17067400	17067634	37.2937017884591	8.59925672510176	1.47785784792045	5.81873062906699	5.9296202873764e-09	8.99800750801991e-06	204.5	0	standard ATAC-Seq in frozen kidney
peak_93880	chrY_random	17063899	17064404	34.0083065544604	8.46642816509242	1.48012053180667	5.72009372423076	1.0646530895457e-08	1.48362536102188e-05	402	0	standard ATAC-Seq in frozen kidney
peak_86997	chr9	3034635	3035315	33.79062506705	8.45701475690012	1.47878983339112	5.71887537088804	1.07231406895495e-08	1.48362536102188e-05	540	2	standard ATAC-Seq in frozen kidney
peak_93881	chrY_random	17065331	17065762	32.1540788572124	8.38545211900579	1.47968292523507	5.66706013565282	1.45268369988286e-08	1.89823389633443e-05	325.5	0	standard ATAC-Seq in frozen kidney
peak_37362	chr17	13498748	13499220	25.2719391763822	4.53473367814938	0.802972968531322	5.64743005788057	1.62864059686409e-08	2.0938025675216e-05	267.5	12	standard ATAC-Seq in frozen kidney
peak_86988	chr9	3009299	3009947	31.460025013903	8.35391516115901	1.47974322928549	5.64551673278668	1.64685851850598e-08	2.0938025675216e-05	477	0	standard ATAC-Seq in frozen kidney
peak_86989	chr9	3012751	3013378	31.2320911812231	8.34336565243394	1.4798579152094	5.63795048611362	1.72085969535627e-08	2.15871523624272e-05	458	0.5	standard ATAC-Seq in frozen kidney
peak_93882	chrY_random	17065888	17066992	30.9836526580041	8.33202042355473	1.48079692079114	5.62671376916641	1.83675127972895e-08	2.27377724540446e-05	803.5	0	standard ATAC-Seq in frozen kidney
peak_93984	chrY_random	17562864	17563477	30.7557188253242	8.32131127623353	1.48036829676917	5.62110881082387	1.89735716519961e-08	2.31829940485033e-05	442.5	0	standard ATAC-Seq in frozen kidney
peak_82567	chr8	19975857	19976615	27.0713382210328	3.22602973192613	0.574210105166098	5.61820438703872	1.92952171836499e-08	2.3273742542171e-05	433.5	35	standard ATAC-Seq in frozen kidney
peak_87000	chr9	3037802	3038291	34.0752056247887	6.00419082610333	1.07044367290466	5.60906750918608	2.03419668387639e-08	2.4225737545461e-05	385.5	5	standard ATAC-Seq in frozen kidney
peak_93986	chrY_random	17564833	17565614	30.2916492837487	8.29935448739182	1.48047766373137	5.6058626825036	2.07220207536339e-08	2.43698734820517e-05	554.5	0	standard ATAC-Seq in frozen kidney
peak_93928	chrY_random	17288275	17288509	30.0719173272844	8.28868988330615	1.48076470109388	5.59757392729789	2.17372170472289e-08	2.52481801414128e-05	165.5	0	standard ATAC-Seq in frozen kidney
peak_93922	chrY_random	17272559	17272949	29.357358793436	8.25418551345403	1.48119383532937	5.57265721512983	2.50882910613402e-08	2.87851425356594e-05	269	0	standard ATAC-Seq in frozen kidney
peak_93923	chrY_random	17274106	17274309	29.1355763679178	8.24310264184185	1.48107732411819	5.56561261698451	2.61233004676417e-08	2.92590294987754e-05	139	0	standard ATAC-Seq in frozen kidney
peak_93879	chrY_random	17062635	17063159	28.6489516667494	8.21906275756825	1.48305364440923	5.54198615036767	2.99059965047617e-08	3.27168124320639e-05	350.5	0	standard ATAC-Seq in frozen kidney
peak_64487	chr4	146797790	146798194	23.8934666475074	4.11172271510085	0.743040414388545	5.53364613213459	3.13641439836164e-08	3.39176179127653e-05	213.5	10.5	standard ATAC-Seq in frozen kidney
peak_20317	chr12	98299517	98300121	32.2189274584868	5.92199587355444	1.07106601498122	5.52906710764999	3.21938183490728e-08	3.44192160424524e-05	449	4	standard ATAC-Seq in frozen kidney
peak_93877	chrY_random	17057110	17057801	27.9589987615478	8.18378334775267	1.48219452648506	5.52139628201167	3.36316313549516e-08	3.55524131771676e-05	454	0	standard ATAC-Seq in frozen kidney
peak_93926	chrY_random	17284816	17285094	27.9487464162783	8.18338374298305	1.4838653207072	5.51491003178302	3.48958424474352e-08	3.64789504998005e-05	182.5	0	standard ATAC-Seq in frozen kidney
peak_37380	chr17	13744598	13746049	25.2536341758219	4.96387389980189	0.902926113394048	5.49754163288397	3.85122408889534e-08	3.98170017533561e-05	828.5	23.5	standard ATAC-Seq in frozen kidney
peak_93985	chrY_random	17563639	17564405	26.7926735004474	8.12233006378259	1.48330916879599	5.47581733778101	4.35496746000647e-08	4.45356960369336e-05	481	0	standard ATAC-Seq in frozen kidney
peak_93929	chrY_random	17291990	17292312	26.5729415439831	8.11025856721159	1.48314653550915	5.46827867175471	4.54427038142548e-08	4.59718914296402e-05	201.5	0	standard ATAC-Seq in frozen kidney
peak_21456	chr13	3372142	3373015	23.0036692888549	3.77284390899947	0.69103145757006	5.45972816095273	4.76864154225831e-08	4.72261160231883e-05	437.5	25	standard ATAC-Seq in frozen kidney
peak_19131	chr12	70754914	70755389	24.4447907290254	3.41883454373504	0.627468035772617	5.44861944963515	5.07622942919526e-08	4.97486347278102e-05	249.5	22	standard ATAC-Seq in frozen kidney
peak_86999	chr9	3037209	3037535	25.8665848863503	8.07149602835738	1.4837439769273	5.43995200915504	5.32949256700331e-08	5.11647601205482e-05	198	0	standard ATAC-Seq in frozen kidney
peak_47280	chr2	22444198	22445723	30.1203621761276	5.82318058524756	1.07249112543606	5.42958393513974	5.64855826366852e-08	5.36801320323965e-05	1056	20	standard ATAC-Seq in frozen kidney
peak_93924	chrY_random	17276257	17276798	24.7002596252499	8.00495177991811	1.48508699114341	5.39022416037386	7.03698516321143e-08	6.62060675110421e-05	311	0	standard ATAC-Seq in frozen kidney
peak_92671	chrX	73843834	73844574	21.8149380890863	3.9718344574458	0.74288232623227	5.34651898045554	8.96618826008081e-08	8.27025382424689e-05	353	16	standard ATAC-Seq in frozen kidney
peak_93925	chrY_random	17280454	17280745	23.7598177277755	7.94908570180578	1.48733886477336	5.34450211049723	9.06659198959001e-08	8.28167159375337e-05	162	0	standard ATAC-Seq in frozen kidney
peak_86978	chr8_random	816915	817220	23.2918828181006	3.34169969707598	0.626049961248999	5.33775242220147	9.41058375972492e-08	8.51323030640577e-05	152.5	13	standard ATAC-Seq in frozen kidney
peak_93927	chrY_random	17285650	17286414	23.3060005314695	7.92106160988989	1.48678778211749	5.32763431685501	9.95001944650283e-08	8.91550171033643e-05	418.5	0	standard ATAC-Seq in frozen kidney
peak_93930	chrY_random	17293668	17293870	23.2895967790383	7.92031611441122	1.48903877299298	5.3190798373177	1.0429336617309e-07	9.17909354039547e-05	110	0	standard ATAC-Seq in frozen kidney
peak_78119	chr7	67007277	67007718	21.5849537873525	3.9554982117156	0.743667677372716	5.31890565109657	1.04393249452326e-07	9.17909354039547e-05	209	9	standard ATAC-Seq in frozen kidney
peak_93932	chrY_random	17306957	17307585	23.0555115391967	7.90576087467322	1.48970022300909	5.30694750028576	1.11476267871921e-07	9.71113121314253e-05	336	0	standard ATAC-Seq in frozen kidney
peak_93950	chrY_random	17363421	17363758	22.595542935729	7.87659545613643	1.48890973408171	5.29017661436295	1.22198302572954e-07	0.000105475072485974	179.5	0	standard ATAC-Seq in frozen kidney
peak_56556	chr3	93503557	93504048	21.6715047906858	7.81621706702665	1.4894146515316	5.24784488925837	1.53888776162926e-07	0.000129630477710654	249.5	0	standard ATAC-Seq in frozen kidney
peak_93952	chrY_random	17367283	17367725	21.6797066669014	7.81661010020457	1.48963493470974	5.24733269747575	1.54317076449446e-07	0.000129630477710654	225	0	standard ATAC-Seq in frozen kidney
peak_64483	chr4	146778564	146778788	22.2187279340961	4.77294817839334	0.910119831891251	5.24430741001988	1.56870465238203e-07	0.000130609238769963	113	4	standard ATAC-Seq in frozen kidney
peak_52501	chr2	154847518	154847880	20.739264769427	7.75278547621006	1.49114979863885	5.19919962654787	2.00148480618689e-07	0.000165180434228492	176	0	standard ATAC-Seq in frozen kidney
peak_8202	chr10	57687988	57688343	21.748039018758	4.74070570096787	0.913184804378289	5.19139792760286	2.08721002452959e-07	0.000170757374554624	174	5	standard ATAC-Seq in frozen kidney
peak_87539	chr9	24346355	24346731	21.518522683625	4.72506228749575	0.912307440610775	5.17924339664751	2.22787633278223e-07	0.000179149819672779	183	5	standard ATAC-Seq in frozen kidney
peak_93951	chrY_random	17366081	17366290	20.4908262462081	7.73568439353457	1.49520471954536	5.17366237038545	2.2954946036835e-07	0.000179832324963898	101	0	standard ATAC-Seq in frozen kidney
peak_93921	chrY_random	17269367	17269970	20.2690438206898	7.71978195052948	1.49254898950773	5.1722134447832	2.31337107812736e-07	0.000179832324963898	287	0	standard ATAC-Seq in frozen kidney
peak_93933	chrY_random	17309456	17309696	20.2690438206898	7.71978195052948	1.49254898950773	5.1722134447832	2.31337107812736e-07	0.000179832324963898	114.5	0	standard ATAC-Seq in frozen kidney
peak_93947	chrY_random	17360175	17360425	20.2690438206898	7.71978195052948	1.49254898950773	5.1722134447832	2.31337107812736e-07	0.000179832324963898	118	0	standard ATAC-Seq in frozen kidney
peak_531	chr1	26743709	26745162	20.4145275881442	3.86983409822461	0.748412975736871	5.17072020887192	2.33193495590016e-07	0.000179832324963898	648	43	standard ATAC-Seq in frozen kidney
peak_93953	chrY_random	17368177	17368408	20.0329081117943	7.70293790137112	1.4936585741272	5.15709415444706	2.50811701412261e-07	0.000190817552135158	108	0	standard ATAC-Seq in frozen kidney
peak_86979	chr8_random	818155	818886	20.3802868017536	4.20908863754449	0.816255110110869	5.15658473117894	2.51494706426874e-07	0.000190817552135158	330	15	standard ATAC-Seq in frozen kidney
peak_7183	chr10	21861990	21862941	20.1809103149035	3.85240288810674	0.749266115243843	5.14156827558258	2.72454607112039e-07	0.000204880965314354	421	24	standard ATAC-Seq in frozen kidney
peak_82559	chr8	19924496	19925086	21.0585540801573	4.692576100725	0.912909635054543	5.14024161925362	2.74385400440129e-07	0.000204880965314354	279	8	standard ATAC-Seq in frozen kidney
peak_86990	chr9	3014037	3014355	50.1390662254693	7.57599032439883	1.47487070274023	5.13671490682066	2.79582595432992e-07	0.000207117868709624	372	1	standard ATAC-Seq in frozen kidney
peak_93971	chrY_random	17415169	17415561	19.3450056756467	7.65229975406842	1.49414092364501	5.12153815812793	3.03053396699677e-07	0.000221498276227603	176.5	0	standard ATAC-Seq in frozen kidney
peak_91719	chr9_random	241931	243658	19.3409047375389	7.65208088817634	1.4942159482856	5.12113453008986	3.03702875475493e-07	0.000221498276227603	786	7	standard ATAC-Seq in frozen kidney
peak_25800	chr13	120283069	120283281	22.3421245085584	3.27647509083759	0.64127962563373	5.10927676456224	3.23394338607012e-07	0.000234045458147412	101	9	standard ATAC-Seq in frozen kidney
peak_86986	chr9	3003328	3003638	47.5743809324807	7.49983595409143	1.47509019531103	5.08432364199265	3.68938385785886e-07	0.000264968169083156	344.5	1	standard ATAC-Seq in frozen kidney
peak_17996	chr12	20239919	20240220	18.6304471417983	7.59832693426458	1.49855686026891	5.07042951503427	3.96918898239317e-07	0.000278681497783953	132	0	standard ATAC-Seq in frozen kidney
peak_93955	chrY_random	17369405	17369717	18.4148161234418	7.58115884344553	1.496682073248	5.06531011425387	4.0773603190541e-07	0.000282194176794486	134.5	0	standard ATAC-Seq in frozen kidney
peak_66884	chr5	60433998	60434448	18.4086647162801	7.58081412467283	1.49663951108064	5.0652238354974	4.07920751294603e-07	0.000282194176794486	195	0	standard ATAC-Seq in frozen kidney
peak_52503	chr2	154850565	154850879	18.6242957346366	7.59796259447038	1.50140570273695	5.06056596203136	4.18013811722793e-07	0.000287065645608142	137.5	0	standard ATAC-Seq in frozen kidney
peak_91746	chrUn_random	3632177	3632587	18.1766299454923	7.56249164553717	1.49723581627889	5.05096896782257	4.39574487163128e-07	0.000296362379668181	174.5	1	standard ATAC-Seq in frozen kidney
peak_21268	chr12	116853410	116853619	19.6743981107217	4.15591296447087	0.822891841092195	5.05037570788754	4.40941942228119e-07	0.000296362379668181	91.5	4.5	standard ATAC-Seq in frozen kidney
peak_93964	chrY_random	17394138	17394405	18.1745794764384	7.5623751188578	1.49739625543951	5.05034996006324	4.41001383390679e-07	0.000296362379668181	112.5	0	standard ATAC-Seq in frozen kidney
peak_93948	chrY_random	17360919	17361129	18.1663776002228	7.56190168993575	1.49922017976806	5.04389001160966	4.56161575036877e-07	0.000304376237334713	89.5	0	standard ATAC-Seq in frozen kidney
peak_93931	chrY_random	17304444	17304859	17.9486961128124	7.54416912733113	1.49803083267837	5.03605731121216	4.75218330506036e-07	0.000314174027678706	173.5	0	standard ATAC-Seq in frozen kidney
peak_52500	chr2	154845944	154847236	17.9404942365968	7.54369726289022	1.49821292483163	5.03513027945478	4.77523951809094e-07	0.000314174027678706	546.5	2	standard ATAC-Seq in frozen kidney
peak_17994	chr12	20237308	20237705	20.1155937470282	4.62377927643956	0.919187856434204	5.03028760016101	4.89744654820035e-07	0.000319976710829398	179.5	5	standard ATAC-Seq in frozen kidney
peak_93973	chrY_random	17417330	17417596	17.9302418913273	7.54309174212208	1.50116427982718	5.02482762445593	5.03884913114855e-07	0.000326944857107482	112	0	standard ATAC-Seq in frozen kidney
peak_86980	chr8_random	819523	819841	19.9024811643264	4.60768269158282	0.918196646932708	5.01818723361174	5.21613281488143e-07	0.000336129742207185	142.5	4.5	standard ATAC-Seq in frozen kidney
peak_93972	chrY_random	17416811	17417111	17.4641218806979	7.50509940256915	1.50279504165201	4.99409380158643	5.91126639260546e-07	0.000377236925724403	121.5	0	standard ATAC-Seq in frozen kidney
peak_25801	chr13	120283894	120284183	18.9937616175879	4.10114181895543	0.821321509586799	4.99334520170875	5.93423519734826e-07	0.000377236925724403	121	6	standard ATAC-Seq in frozen kidney
peak_93946	chrY_random	17358176	17358864	17.0103046843919	7.46684390557218	1.50099719054475	4.97458886173016	6.53862651334959e-07	0.000405346743882365	274	0	standard ATAC-Seq in frozen kidney
peak_64482	chr4	146777628	146777870	22.6460382536261	5.40356127825676	1.08626080340712	4.97446033338235	6.54296597820534e-07	0.000405346743882365	125	2	standard ATAC-Seq in frozen kidney
peak_52502	chr2	154848580	154849279	17.008254215338	7.46671911756521	1.50124870808275	4.97367230184065	6.56963279255823e-07	0.000405346743882365	278.5	0	standard ATAC-Seq in frozen kidney
peak_93884	chrY_random	17073233	17073438	17.0226074987153	7.46759425672717	1.50228627824846	4.97081971981649	6.66704209396779e-07	0.000405346743882365	81	0	standard ATAC-Seq in frozen kidney
peak_82553	chr8	19899366	19899869	20.0034718001206	3.3124624837401	0.666389509126238	4.97076025113806	6.66908755302873e-07	0.000405346743882365	214.5	20	standard ATAC-Seq in frozen kidney
peak_93942	chrY_random	17342061	17342395	17.0041532772302	7.46646715115647	1.50215585651649	4.97050097615785	6.67801253167592e-07	0.000405346743882365	133	0	standard ATAC-Seq in frozen kidney
peak_93962	chrY_random	17389280	17389573	16.7803203826581	7.44713087482187	1.50167586051591	4.9592132833935	7.07792259653318e-07	0.000424147892770465	114.5	0	standard ATAC-Seq in frozen kidney
peak_86969	chr8_random	698707	698912	19.4138059941041	4.57083071386207	0.922636508085408	4.95409695346561	7.26669694792372e-07	0.000431605816650729	90.5	3	standard ATAC-Seq in frozen kidney
peak_93966	chrY_random	17398257	17398527	16.7700680373886	7.44649507939617	1.50332072088192	4.95336422624955	7.29412591514576e-07	0.000431605816650729	106	0	standard ATAC-Seq in frozen kidney
peak_93949	chrY_random	17361640	17362033	16.5462351428164	7.42688913318813	1.50251417811169	4.94297441007976	7.69395862567347e-07	0.000446833771221751	152	0	standard ATAC-Seq in frozen kidney
peak_93954	chrY_random	17368751	17368980	16.5462351428164	7.42688913318813	1.50251417811169	4.94297441007976	7.69395862567347e-07	0.000446833771221751	89	0	standard ATAC-Seq in frozen kidney
peak_93151	chrX	122633339	122633763	16.3100994339209	7.40622937179075	1.50361437465277	4.92561756301452	8.40943313651594e-07	0.000479505877444139	161	1.5	standard ATAC-Seq in frozen kidney
peak_72153	chr6	47698419	47698942	16.080115132187	7.38566466071675	1.50424152308865	4.90989282462553	9.11261829474006e-07	0.000516471365677126	195	0.5	standard ATAC-Seq in frozen kidney
peak_37379	chr17	13743481	13744369	21.494066275903	5.32618474599688	1.08533440252271	4.9074135433438	9.2285314078372e-07	0.000519908934397334	435.5	8	standard ATAC-Seq in frozen kidney
peak_93894	chrY_random	17105251	17105673	16.0719132559714	7.38513402705095	1.50567659216266	4.9048607552857	9.34936397158498e-07	0.000523581077701565	159	0	standard ATAC-Seq in frozen kidney
peak_21266	chr12	116845023	116845329	18.5055544139665	4.06219257531922	0.832259063049131	4.88092320729635	1.05590356135819e-06	0.00058782588617315	125.5	5.5	standard ATAC-Seq in frozen kidney
peak_64495	chr4	146894275	146894482	18.7334882466464	4.08098879513065	0.836777496539002	4.87702981020647	1.07695165066252e-06	0.000596016718525189	85.5	4	standard ATAC-Seq in frozen kidney
peak_93959	chrY_random	17381979	17382263	15.6160455906115	7.34336292651725	1.50608592516288	4.87579281090692	1.083723102733e-06	0.000596256846049289	103	0	standard ATAC-Seq in frozen kidney
peak_93893	chrY_random	17102861	17103069	15.605793245342	7.34268075240743	1.50759592853436	4.87045674071685	1.11340576504748e-06	0.000609026480191639	76	0	standard ATAC-Seq in frozen kidney
peak_91787	chrUn_random	5249068	5249764	71.4376081963327	4.71873380200391	0.96929428298569	4.86821586058356	1.12610287821481e-06	0.000612411197058288	1123.5	34.5	standard ATAC-Seq in frozen kidney
peak_93965	chrY_random	17397420	17397695	15.3840108198238	7.32173773066514	1.50711083023574	4.85812827018163	1.18500634612973e-06	0.000633459954902972	98.5	0	standard ATAC-Seq in frozen kidney
peak_93945	chrY_random	17351784	17352392	15.3758089436082	7.32118616260357	1.50770110900926	4.8558604347081	1.1986510686344e-06	0.000637133833278703	218	0	standard ATAC-Seq in frozen kidney
peak_50284	chr2	98506319	98507564	1090.79428260613	3.6288596142863	0.748026301916374	4.85124601232537	1.22688251484131e-06	0.000648476335077615	29481.5	1961	standard ATAC-Seq in frozen kidney
peak_24284	chr13	77578040	77578424	15.1417237037665	7.29908270403329	1.50897539082321	4.837111823309	1.31739321927601e-06	0.000688579479161916	137.5	0	standard ATAC-Seq in frozen kidney
peak_93899	chrY_random	17178924	17179173	14.9178908091944	7.27734799435588	1.50911886205535	4.82224970963815	1.41948087191338e-06	0.000737839883271972	86	0	standard ATAC-Seq in frozen kidney
peak_40835	chr18	3004711	3005050	20.3256905457487	5.24355160698261	1.08892613897281	4.81534184855629	1.46948107443378e-06	0.00075963290069205	156.5	4	standard ATAC-Seq in frozen kidney
peak_82552	chr8	19898422	19898653	18.3490885563236	3.41985118942146	0.711762337845049	4.80476559040128	1.54932914213998e-06	0.00079529422691011	90.5	7	standard ATAC-Seq in frozen kidney
peak_27181	chr14	44109888	44110515	14.6817551002989	7.25441398774281	1.51008207570008	4.80398655442595	1.55537278521582e-06	0.00079529422691011	213.5	0	standard ATAC-Seq in frozen kidney
peak_93900	chrY_random	17180750	17181236	14.6715027550294	7.25368314933633	1.51270674072131	4.79516812748352	1.6253845139776e-06	0.00082215618940083	165.5	0	standard ATAC-Seq in frozen kidney
peak_93901	chrY_random	17183027	17183678	14.6715027550294	7.25368314933633	1.51270674072131	4.79516812748352	1.6253845139776e-06	0.00082215618940083	227	0	standard ATAC-Seq in frozen kidney
peak_93987	chrY_random	17573072	17573319	14.4456193914033	7.23110910061526	1.51149039218578	4.78409200481805	1.71762000117673e-06	0.000859568311546331	83.5	0	standard ATAC-Seq in frozen kidney
peak_27183	chr14	44502605	44503349	14.4435689223494	7.23096145076415	1.51193671514704	4.78258208714833	1.73057678841676e-06	0.000861470137484731	254	1	standard ATAC-Seq in frozen kidney
peak_93920	chrY_random	17267076	17267564	14.4394679842416	7.23066222856288	1.51339608643758	4.77777251663398	1.77247740474171e-06	0.000874268854743532	163.5	0	standard ATAC-Seq in frozen kidney
peak_53849	chr2	181652027	181652885	17.3535824362434	3.96343762564664	0.829868826603011	4.77598085214334	1.78833409905794e-06	0.000874268854743532	326	15.5	standard ATAC-Seq in frozen kidney
peak_92181	chrX	32099670	32100008	14.4374175151877	7.23050987339878	1.5144318319658	4.77440431505804	1.80239953001016e-06	0.000874268854743532	114.5	1.5	standard ATAC-Seq in frozen kidney
peak_64488	chr4	146805085	146805297	19.8611530375723	5.20894310823417	1.09102319290183	4.77436514835197	1.80275031429956e-06	0.000874268854743532	97	2	standard ATAC-Seq in frozen kidney
peak_93970	chrY_random	17414718	17415027	14.4353670461338	7.23035542974503	1.51562903852704	4.77053107716372	1.83740833792579e-06	0.00088650712131832	104.5	0	standard ATAC-Seq in frozen kidney
peak_93940	chrY_random	17338805	17339224	14.2217864968312	7.20831685168798	1.51291088541009	4.7645349909252	1.89289668877183e-06	0.000899684084768466	140.5	0	standard ATAC-Seq in frozen kidney
peak_93963	chrY_random	17390237	17390535	14.2217864968312	7.20831685168798	1.51291088541009	4.7645349909252	1.89289668877183e-06	0.000899684084768466	99.5	0	standard ATAC-Seq in frozen kidney
peak_86982	chr8_random	842509	842713	17.3531144696425	3.9630452522272	0.831789567910111	4.76448059114812	1.89340740393223e-06	0.000899684084768466	78.5	4	standard ATAC-Seq in frozen kidney
peak_82573	chr8	20002000	20002214	18.3358498087984	3.41838152638779	0.717934130142433	4.76141387192389	1.92241340875879e-06	0.000908642012784132	84.5	6.5	standard ATAC-Seq in frozen kidney
peak_93961	chrY_random	17388373	17388809	13.9815498498278	7.18394537979252	1.51352227323485	4.74650786898451	2.06958676721456e-06	0.000968585039723768	143.5	0	standard ATAC-Seq in frozen kidney
peak_82539	chr8	19759597	19760340	13.9794993807739	7.18379355785765	1.51380154762162	4.74553191542466	2.07959119101433e-06	0.000968585039723768	244	1	standard ATAC-Seq in frozen kidney
peak_64489	chr4	146805890	146806706	17.3275435260683	4.3992628074578	0.92821000596938	4.73951237237894	2.14233154597449e-06	0.000988024406078028	317.5	13	standard ATAC-Seq in frozen kidney
peak_72157	chr6	47717643	47718055	13.751565548094	7.15992626791189	1.51467867417932	4.72702652382116	2.27831514544932e-06	0.00103803186530042	133.5	0	standard ATAC-Seq in frozen kidney
peak_93944	chrY_random	17349530	17350015	13.7495150790401	7.1597722981512	1.51466282995252	4.72697431835417	2.27890074719185e-06	0.00103803186530042	157	0	standard ATAC-Seq in frozen kidney
peak_93902	chrY_random	17185147	17185368	13.7536160171479	7.16008049718664	1.51489772867312	4.72644480327928	2.28484862315113e-06	0.00103803186530042	71.5	0	standard ATAC-Seq in frozen kidney
peak_82575	chr8	20008199	20008503	17.3873552560332	3.62055997338622	0.766166345361705	4.72555339360014	2.29489523062071e-06	0.00103803186530042	114.5	7	standard ATAC-Seq in frozen kidney
peak_27175	chr14	44036085	44036372	13.7577169552557	7.16039152175406	1.51595061875814	4.72336726088071	2.31971386755849e-06	0.00104423751101199	92	0	standard ATAC-Seq in frozen kidney
peak_93845	chrY	581744	582400	13.5133793701445	7.13487342430663	1.51628511667007	4.70549591621369	2.5324957519926e-06	0.00112266783653837	210	0	standard ATAC-Seq in frozen kidney
peak_93876	chrY_random	17049929	17050978	13.5113289010906	7.13471539108228	1.5167974808344	4.70380224204845	2.55360603955243e-06	0.00112266783653837	335	0	standard ATAC-Seq in frozen kidney
peak_93969	chrY_random	17406471	17406828	13.5113289010906	7.13471539108228	1.5167974808344	4.70380224204845	2.55360603955243e-06	0.00112266783653837	113.5	0	standard ATAC-Seq in frozen kidney
peak_93975	chrY_random	17423966	17424209	13.5051774939289	7.13423144005211	1.51965715462392	4.69463221907949	2.67086813631263e-06	0.00115267562783808	77	0	standard ATAC-Seq in frozen kidney
peak_93974	chrY_random	17421798	17422429	13.2813445993568	7.10985694093073	1.51741581495665	4.68550338730578	2.79272679572301e-06	0.00119976308274889	197.5	0	standard ATAC-Seq in frozen kidney
peak_77915	chr7	54840429	54840714	17.6529842439603	3.35865669896204	0.716967574837827	4.6845308167831	2.80601949181719e-06	0.00119999423567562	106	9.5	standard ATAC-Seq in frozen kidney
peak_64486	chr4	146794271	146794649	16.8712078941076	4.35828382930996	0.931233211360765	4.6801207003146	2.86706075043982e-06	0.0012205505727766	143.5	6	standard ATAC-Seq in frozen kidney
peak_72152	chr6	47694043	47694612	18.7050801217414	5.11979284265669	1.09425470307065	4.67879446009209	2.88566531864547e-06	0.00122293716294649	242	5	standard ATAC-Seq in frozen kidney
peak_66035	chr5	33076594	33076900	16.857790543932	4.35818966984899	0.933581045973646	4.66824994856635	3.03776199560247e-06	0.00127590072246548	114	6	standard ATAC-Seq in frozen kidney
peak_72154	chr6	47702702	47703447	16.9237536810586	3.57863597386252	0.766751244418133	4.66727116508073	3.05226391347249e-06	0.00127629398120547	274	19.5	standard ATAC-Seq in frozen kidney
peak_93957	chrY_random	17376692	17376985	13.0513602976229	7.08456124171602	1.51854488991498	4.66536174779309	3.08074572911207e-06	0.00128250354173474	88.5	0	standard ATAC-Seq in frozen kidney
peak_21264	chr12	116841206	116841429	19.119357882029	3.02492895960028	0.649393724587413	4.65808159991405	3.19169706396906e-06	0.00132283892012952	89.5	9	standard ATAC-Seq in frozen kidney
peak_29865	chr15	9152104	9152663	12.8152245887274	7.05831785764322	1.52018926907139	4.64305202072293	3.43299869239533e-06	0.00141042277719052	167.5	1	standard ATAC-Seq in frozen kidney
peak_62745	chr4	118220681	118221313	18.2353271396051	5.08245981087128	1.09513120642506	4.64095971428155	3.46794737360875e-06	0.00141858649022275	263	4	standard ATAC-Seq in frozen kidney
peak_21282	chr12	117061214	117061534	18.2312262014973	5.08222382374808	1.09541477186836	4.63954289668719	3.49180652999888e-06	0.00142147832057071	133.5	3.5	standard ATAC-Seq in frozen kidney
peak_59122	chr4	3010442	3010996	16.3973539738634	4.31573327159946	0.933206046872483	4.62463063335592	3.75266519667901e-06	0.00151528755235687	203.5	11	standard ATAC-Seq in frozen kidney
peak_93967	chrY_random	17400314	17400514	12.5831898179397	7.03192539711672	1.52151940050523	4.621646884543	3.80705633659226e-06	0.00152416715453451	59	0	standard ATAC-Seq in frozen kidney
peak_10395	chr10	95540112	95540508	17.1822953286223	3.31559685234116	0.718076990550787	4.61732780185311	3.88712995143391e-06	0.00154963070856253	144	13	standard ATAC-Seq in frozen kidney
peak_64451	chr4	145717051	145717578	16.6150354612739	4.33610774590385	0.939304309370071	4.61629708567162	3.90647613980349e-06	0.00155077212937186	195	7	standard ATAC-Seq in frozen kidney
peak_93916	chrY_random	17254132	17254399	12.349104578098	7.00486911266995	1.5232010481512	4.59878170460307	4.24968787205119e-06	0.00165216274407517	77	0	standard ATAC-Seq in frozen kidney
peak_64481	chr4	146776204	146776464	18.2143544824652	5.08079884569596	1.10596347486507	4.59400238901726	4.34824395835051e-06	0.00167662228005529	109	2.5	standard ATAC-Seq in frozen kidney
peak_93878	chrY_random	17058140	17058340	12.3614073924214	7.00590803150382	1.52558945520361	4.59226301519553	4.38465284578098e-06	0.00168376038240658	58.5	0	standard ATAC-Seq in frozen kidney
peak_94024	chrY_random	40703145	40703411	12.3409027018824	7.00416793276078	1.52674158085033	4.58765780706633	4.48246575021779e-06	0.00170738390760219	76	0	standard ATAC-Seq in frozen kidney
peak_93934	chrY_random	17314149	17314396	12.3368017637746	7.00380250229562	1.53009642933041	4.57736020295178	4.70880261355036e-06	0.00174881823545802	70.5	0	standard ATAC-Seq in frozen kidney
peak_61524	chr4	88445913	88446264	12.1191202763642	6.97764616559571	1.5245366254691	4.57689638217035	4.71925061417755e-06	0.00174881823545802	99.5	0	standard ATAC-Seq in frozen kidney
peak_93887	chrY_random	17085637	17085957	12.1191202763642	6.97764616559571	1.5245366254691	4.57689638217035	4.71925061417755e-06	0.00174881823545802	90	0	standard ATAC-Seq in frozen kidney
peak_93968	chrY_random	17405459	17405727	12.1211707454181	6.9778213010911	1.52468352630632	4.57657027225543	4.72660983843506e-06	0.00174881823545802	76	0	standard ATAC-Seq in frozen kidney
peak_21267	chr12	116852597	116852857	17.5371723581879	5.02441816763879	1.09800608095971	4.5759474876926	4.7406945825404e-06	0.00174881823545802	103.5	3.5	standard ATAC-Seq in frozen kidney
peak_93956	chrY_random	17375982	17376566	12.1150193382564	6.9772954097125	1.52502932954854	4.5751876862447	4.7579325124091e-06	0.00174881823545802	164	0	standard ATAC-Seq in frozen kidney
peak_71036	chr6	9839814	9840294	17.5330714200801	5.02417280961048	1.09814118609708	4.57516107511363	4.75853733700299e-06	0.00174881823545802	192	5	standard ATAC-Seq in frozen kidney
peak_530	chr1	26742891	26743154	16.9538935293414	3.29385352721072	0.720984738889125	4.56854819463419	4.91114150042463e-06	0.00179787908865545	94	8	standard ATAC-Seq in frozen kidney
peak_76442	chr7	12595726	12596304	15.9531719353013	3.83397890664939	0.839949290649939	4.56453615632287	5.00599923321947e-06	0.00181940292967817	200.5	13	standard ATAC-Seq in frozen kidney
peak_61074	chr4	70039030	70039401	15.9332844322879	4.27215049247687	0.936037621398724	4.5640798989393	5.0168971026031e-06	0.00181940292967817	130.5	6.5	standard ATAC-Seq in frozen kidney
peak_21269	chr12	116855396	116856015	15.9307659966332	4.27159160010356	0.936175142348117	4.56281245557273	5.0472897829151e-06	0.00181940292967817	219	11	standard ATAC-Seq in frozen kidney
peak_21270	chr12	116859531	116859866	16.9420586816189	3.29343336256044	0.722040776240074	4.56128444671855	5.08416514311629e-06	0.0018257004166405	122	11	standard ATAC-Seq in frozen kidney
peak_93844	chrY	346529	347263	11.8891359746303	6.94990000041413	1.5265355917225	4.55272712807963	5.2954940117429e-06	0.00187597521213126	203.5	0	standard ATAC-Seq in frozen kidney
peak_93958	chrY_random	17378861	17379134	11.8911864436842	6.95007982847535	1.52709842029481	4.55116692945936	5.33491993154243e-06	0.00187597521213126	76.5	0	standard ATAC-Seq in frozen kidney
peak_93938	chrY_random	17334962	17335329	11.8809340984147	6.94918401514679	1.52701907083796	4.55081678274875	5.34380660535037e-06	0.00187597521213126	101.5	0	standard ATAC-Seq in frozen kidney
peak_64456	chr4	145750692	145750892	11.8788836293608	6.94900284821855	1.52782832859212	4.5482877350638	5.40841564925543e-06	0.00189159839973568	55.5	0	standard ATAC-Seq in frozen kidney
peak_65409	chr5	14972935	14973151	15.7272885716753	3.81174493297057	0.839365329895429	4.54122275153472	5.59289004105095e-06	0.00194713034526855	74.5	5	standard ATAC-Seq in frozen kidney
peak_94050	chrY_random	49241731	49242034	11.874782691253	6.94863383758694	1.53032302984142	4.54063207707656	5.60858309756042e-06	0.00194713034526855	84.5	0	standard ATAC-Seq in frozen kidney
peak_93960	chrY_random	17383634	17383871	11.6509497966809	6.92088041968903	1.52807852234144	4.52913925462701	5.92244578358031e-06	0.00204103101339409	64.5	0	standard ATAC-Seq in frozen kidney
peak_91805	chrUn_random	5890176	5890543	11.6406974514114	6.91994802802056	1.53305314758325	4.5138343957151	6.36659375040357e-06	0.00216929929299786	100.5	0	standard ATAC-Seq in frozen kidney
peak_93903	chrY_random	17188417	17188798	11.420965494947	6.89200942131352	1.5298275066571	4.50508922824481	6.63450590876956e-06	0.00221391111288861	101	0	standard ATAC-Seq in frozen kidney
peak_94028	chrY_random	40719351	40719650	11.4189150258931	6.89182337570058	1.52981161564419	4.50501441172448	6.63684381721079e-06	0.00221391111288861	81	0	standard ATAC-Seq in frozen kidney
peak_86983	chr8_random	843434	843734	15.9179952157089	4.27024399372586	0.947982975956102	4.50455767881174	6.65113316316233e-06	0.00221391111288861	106	4	standard ATAC-Seq in frozen kidney
peak_93885	chrY_random	17079885	17080101	11.4230159640009	6.89219582571515	1.53013908222483	4.5042936983832	6.65940547120603e-06	0.00221391111288861	58	0	standard ATAC-Seq in frozen kidney
peak_93906	chrY_random	17206546	17206833	11.4230159640009	6.89219582571515	1.53013908222483	4.5042936983832	6.65940547120603e-06	0.00221391111288861	77	0	standard ATAC-Seq in frozen kidney
peak_2448	chr1	85245668	85245868	11.4250664330548	6.89238323718028	1.53074835233994	4.50262332580296	6.7119782706565e-06	0.00222353187196541	54	0	standard ATAC-Seq in frozen kidney
peak_41108	chr18	11288487	11288920	15.4968363033406	3.78844732269179	0.84229404568353	4.49777288834736	6.86689929610449e-06	0.00226687188236982	146.5	7	standard ATAC-Seq in frozen kidney
peak_93886	chrY_random	17083343	17083733	11.4086626806236	6.89087591101788	1.53425992603434	4.4913353950585	7.07779909142383e-06	0.00230415422809145	106	0	standard ATAC-Seq in frozen kidney
peak_82579	chr8	20032755	20033147	15.456912076389	4.22636085228594	0.941605248533691	4.48846356673077	7.17386898550146e-06	0.00231937840468362	135.5	6	standard ATAC-Seq in frozen kidney
peak_21262	chr12	116814472	116814674	11.1889307241593	6.86235919062549	1.53182640569185	4.47985435237756	7.46939902641516e-06	0.0023837605050684	53	0.5	standard ATAC-Seq in frozen kidney
peak_62744	chr4	118219805	118220540	11.1889307241593	6.86235919062549	1.53182640569185	4.47985435237756	7.46939902641516e-06	0.0023837605050684	193	0	standard ATAC-Seq in frozen kidney
peak_71514	chr6	29697766	29699075	11.1848297860515	6.86197901027146	1.53179381625694	4.47970146990099	7.47475080192892e-06	0.0023837605050684	342.5	5.5	standard ATAC-Seq in frozen kidney
peak_93941	chrY_random	17340385	17341165	11.1909811932132	6.86255000859037	1.53230579767598	4.47857733032054	7.51421497509549e-06	0.0023837605050684	208	0	standard ATAC-Seq in frozen kidney
peak_93983	chrY_random	17547756	17548225	11.1827793169976	6.86178828729615	1.53224072282742	4.4782704082125	7.52502439341128e-06	0.0023837605050684	121.5	0	standard ATAC-Seq in frozen kidney
peak_54359	chr3	22600323	22600785	15.759478889012	3.4668109878908	0.775256464568597	4.47182467523178	7.75550005104177e-06	0.00244033682709754	157	12	standard ATAC-Seq in frozen kidney
peak_93905	chrY_random	17201419	17201729	11.1766279098359	6.86120562206203	1.53548245658683	4.46843634886819	7.87934507655317e-06	0.00247104140945784	81.5	0	standard ATAC-Seq in frozen kidney
peak_64473	chr4	146709911	146710176	15.2289782437091	4.20362972585636	0.94101934123724	4.46710236617398	7.92861964375863e-06	0.00247823362772008	89.5	4	standard ATAC-Seq in frozen kidney
peak_77916	chr7	54844058	54844368	16.3672141255806	4.922154123879	1.1046133280928	4.4559974053341	8.35040417104192e-06	0.00257388949670189	116	3.5	standard ATAC-Seq in frozen kidney
peak_61519	chr4	88431249	88431668	10.9548454843176	6.83189252265445	1.53361707095194	4.45475774367444	8.39879760942445e-06	0.00257388949670189	108	0	standard ATAC-Seq in frozen kidney
peak_93846	chrY	622268	623297	10.9548454843176	6.83189252265445	1.53361707095194	4.45475774367444	8.39879760942445e-06	0.00257388949670189	261	0	standard ATAC-Seq in frozen kidney
peak_78118	chr7	67004434	67004867	10.9507445462098	6.83150399102154	1.53390551041948	4.45366676409768	8.44160850866199e-06	0.00257708192545501	109.5	0	standard ATAC-Seq in frozen kidney
peak_93915	chrY_random	17251048	17251328	10.9589464224254	6.83228259792631	1.53461740213136	4.45210812052391	8.50313290368902e-06	0.00257708192545501	72.5	0	standard ATAC-Seq in frozen kidney
peak_93888	chrY_random	17087130	17087337	10.9486940771559	6.8313085332183	1.53453466089128	4.45171341340089	8.51878106370449e-06	0.00257708192545501	52.5	0	standard ATAC-Seq in frozen kidney
peak_64476	chr4	146724611	146725070	10.9445931390481	6.83091177592164	1.53678762114241	4.44492894264966	8.79209220919116e-06	0.00260121512992872	119	1	standard ATAC-Seq in frozen kidney
peak_93990	chrY_random	17592537	17592738	10.9445931390481	6.83091177592164	1.53678762114241	4.44492894264966	8.79209220919116e-06	0.00260121512992872	51.5	0	standard ATAC-Seq in frozen kidney
peak_93991	chrY_random	17593908	17594146	10.9445931390481	6.83091177592164	1.53678762114241	4.44492894264966	8.79209220919116e-06	0.00260121512992872	60.5	0	standard ATAC-Seq in frozen kidney
peak_94001	chrY_random	17677726	17677996	10.9445931390481	6.83091177592164	1.53678762114241	4.44492894264966	8.79209220919116e-06	0.00260121512992872	69	0	standard ATAC-Seq in frozen kidney
peak_94064	chrY_random	49901967	49902261	10.9445931390481	6.83091177592164	1.53678762114241	4.44492894264966	8.79209220919116e-06	0.00260121512992872	76	0	standard ATAC-Seq in frozen kidney
peak_65436	chr5	15150180	15150414	15.0005764444283	4.18008612556871	0.942060068854388	4.43717578503459	9.11468578266027e-06	0.00267980307028133	77.5	4.5	standard ATAC-Seq in frozen kidney
peak_65432	chr5	15119785	15120197	15.2524987182294	3.7641609003582	0.848784469105692	4.43476646589003	9.21721502047397e-06	0.0027015054229634	136	8	standard ATAC-Seq in frozen kidney
peak_53921	chr3	8245689	8246669	15.5233431801165	3.44313668646475	0.776929516815544	4.4317233570651	9.34829082456074e-06	0.00272920490481453	330.5	27	standard ATAC-Seq in frozen kidney
peak_61525	chr4	88448791	88449213	10.720760244476	6.80076860059963	1.53553636396497	4.42892057797908	9.4705887879748e-06	0.00272920490481453	106.5	0	standard ATAC-Seq in frozen kidney
peak_65438	chr5	15159140	15159461	10.720760244476	6.80076860059963	1.53553636396497	4.42892057797908	9.4705887879748e-06	0.00272920490481453	80	0	standard ATAC-Seq in frozen kidney
peak_93853	chrY_random	6749368	6749614	10.7228107135299	6.80096707264608	1.53572084137812	4.42851779399117	9.48828919519487e-06	0.00272920490481453	61	0	standard ATAC-Seq in frozen kidney
peak_93917	chrY_random	17257597	17257866	10.7187097754221	6.80057016102469	1.5356873086258	4.42835603499915	9.49540661104895e-06	0.00272920490481453	67.5	0	standard ATAC-Seq in frozen kidney
peak_94062	chrY_random	49896304	49896671	10.7187097754221	6.80057016102469	1.5356873086258	4.42835603499915	9.49540661104895e-06	0.00272920490481453	93	0	standard ATAC-Seq in frozen kidney
peak_94003	chrY_random	17701396	17701760	10.7166593063682	6.80037101241405	1.53617503426873	4.42682042131431	9.56322832239116e-06	0.00273116732622552	90	0	standard ATAC-Seq in frozen kidney
peak_93891	chrY_random	17096874	17097257	10.7146088373143	6.80017042168464	1.53700353557147	4.42430369501803	9.67538348726281e-06	0.00274183465250647	95.5	0	standard ATAC-Seq in frozen kidney
peak_93989	chrY_random	17583455	17583756	10.7105078992065	6.79976212716999	1.5397128128476	4.41625351846898	1.00426294441516e-05	0.00281399297202175	74.5	0	standard ATAC-Seq in frozen kidney
peak_82558	chr8	19920610	19920954	24.7201471282633	6.54813565906112	1.48505321786758	4.40936094429243	1.03676103946617e-05	0.00288584582473656	197.5	1	standard ATAC-Seq in frozen kidney
peak_93829	chrX	166440501	166440857	10.4887254736882	6.76916117587497	1.53763108030645	4.40233113298273	1.07093938354892e-05	0.00293089577380236	88	0.5	standard ATAC-Seq in frozen kidney
peak_61516	chr4	88422495	88422904	10.4866750046343	6.76895837230064	1.53761429522798	4.40224729524709	1.07135341509429e-05	0.00293089577380236	100.5	0	standard ATAC-Seq in frozen kidney
peak_61517	chr4	88425384	88425807	10.4866750046343	6.76895837230064	1.53761429522798	4.40224729524709	1.07135341509429e-05	0.00293089577380236	105.5	0	standard ATAC-Seq in frozen kidney
peak_93833	chrX	166527122	166527593	10.4907759427421	6.76936439933682	1.53799863056617	4.40141120076607	1.07549082773544e-05	0.00293089577380236	115	1	standard ATAC-Seq in frozen kidney
peak_93889	chrY_random	17089631	17089831	10.492826411796	6.76956881112094	1.53871971454742	4.39948143064642	1.08509861516226e-05	0.00293089577380236	49	0	standard ATAC-Seq in frozen kidney
peak_90213	chr9	91605713	91606431	10.4825740665265	6.76855092610816	1.53863611030286	4.39905893328857	1.08721301941586e-05	0.00293089577380236	172.5	1	standard ATAC-Seq in frozen kidney
peak_93850	chrY_random	6006246	6006577	10.4825740665265	6.76855092610816	1.53863611030286	4.39905893328857	1.08721301941586e-05	0.00293089577380236	81	0	standard ATAC-Seq in frozen kidney
peak_93939	chrY_random	17335518	17335818	10.4825740665265	6.76855092610816	1.53863611030286	4.39905893328857	1.08721301941586e-05	0.00293089577380236	74	0	standard ATAC-Seq in frozen kidney
peak_50281	chr2	98502339	98503145	781.906711592187	3.25803530523236	0.744127986922183	4.37832652781687	1.19594077929458e-05	0.00316060944770708	13384.5	1151	standard ATAC-Seq in frozen kidney
peak_61523	chr4	88442938	88443354	10.2587411719544	6.73705430221568	1.54048757906785	4.37332594806916	1.22367811162995e-05	0.00316794321015397	100.5	0	standard ATAC-Seq in frozen kidney
peak_72144	chr6	47617817	47618357	10.2587411719544	6.73705430221568	1.54048757906785	4.37332594806916	1.22367811162995e-05	0.00316794321015397	128.5	0	standard ATAC-Seq in frozen kidney
peak_72145	chr6	47622151	47622685	10.2587411719544	6.73705430221568	1.54048757906785	4.37332594806916	1.22367811162995e-05	0.00316794321015397	126.5	0	standard ATAC-Seq in frozen kidney
peak_93859	chrY_random	7317273	7317549	10.2505392957388	6.73622246684255	1.54042133782539	4.37297400486028	1.22565323012239e-05	0.00316794321015397	65	0	standard ATAC-Seq in frozen kidney
peak_93865	chrY_random	16882967	16883329	10.2505392957388	6.73622246684255	1.54042133782539	4.37297400486028	1.22565323012239e-05	0.00316794321015397	87	0	standard ATAC-Seq in frozen kidney
peak_93919	chrY_random	17259300	17259571	10.2505392957388	6.73622246684255	1.54042133782539	4.37297400486028	1.22565323012239e-05	0.00316794321015397	65	0	standard ATAC-Seq in frozen kidney
peak_93914	chrY_random	17247948	17248163	10.2607916410083	6.73726435002683	1.54142797689351	4.37079412792589	1.23795472730055e-05	0.00318575494049651	51	0	standard ATAC-Seq in frozen kidney
peak_86966	chr8_random	681512	681843	23.7883750736054	6.49228482693682	1.48592823236253	4.36917792228398	1.24715127678622e-05	0.00319715895296671	183	1	standard ATAC-Seq in frozen kidney
peak_82571	chr8	19995156	19995886	15.2794735616062	3.41889944191647	0.783014961780289	4.36632709309047	1.26353222797302e-05	0.00323035061424961	239.5	17	standard ATAC-Seq in frozen kidney
peak_77917	chr7	54852247	54852479	15.2774230925523	3.41874865644059	0.784941403484955	4.35541894116192	1.32812658753356e-05	0.00337262872838222	75	6	standard ATAC-Seq in frozen kidney
peak_91796	chrUn_random	5731601	5731974	15.4304051996131	4.83396956993444	1.10995083212908	4.35512045219342	1.329937670174e-05	0.00337262872838222	130	5	standard ATAC-Seq in frozen kidney
peak_72148	chr6	47630798	47631346	10.0226054630589	6.70357766237113	1.54204385015056	4.3472030070459	1.37884588246621e-05	0.00344245069868783	128.5	0	standard ATAC-Seq in frozen kidney
peak_27180	chr14	44108872	44109433	10.020554994005	6.70336532246476	1.54202765639839	4.34711095786788	1.37942445862197e-05	0.00344245069868783	130.5	0	standard ATAC-Seq in frozen kidney
peak_93898	chrY_random	17176113	17176411	10.020554994005	6.70336532246476	1.54202765639839	4.34711095786788	1.37942445862197e-05	0.00344245069868783	70.5	0	standard ATAC-Seq in frozen kidney
peak_93936	chrY_random	17320283	17320871	10.020554994005	6.70336532246476	1.54202765639839	4.34711095786788	1.37942445862197e-05	0.00344245069868783	135.5	0	standard ATAC-Seq in frozen kidney
peak_93999	chrY_random	17655005	17655329	10.020554994005	6.70336532246476	1.54202765639839	4.34711095786788	1.37942445862197e-05	0.00344245069868783	75	0	standard ATAC-Seq in frozen kidney
peak_94026	chrY_random	40713961	40714315	10.020554994005	6.70336532246476	1.54202765639839	4.34711095786788	1.37942445862197e-05	0.00344245069868783	83	0	standard ATAC-Seq in frozen kidney
peak_61521	chr4	88437080	88437509	10.0246559321128	6.70379045773339	1.54244421326452	4.34621258913806	1.38508333721835e-05	0.00344742845543688	101	0	standard ATAC-Seq in frozen kidney
peak_65419	chr5	15006437	15007168	14.5573303390679	3.69251167137396	0.850381555137746	4.34218222286799	1.41074448054895e-05	0.0035020335874271	231.5	19.5	standard ATAC-Seq in frozen kidney
peak_94041	chrY_random	40810751	40810990	10.0144035868432	6.70272257103289	1.54430182790582	4.34029310197881	1.42292790197506e-05	0.00352298225793472	56	0	standard ATAC-Seq in frozen kidney
peak_94027	chrY_random	40714901	40715106	10.0103026487354	6.7022812598857	1.54781620235481	4.33015318594611	1.49005650352088e-05	0.00364127236417545	48.5	0	standard ATAC-Seq in frozen kidney
peak_59708	chr4	28103937	28104293	9.78852022321721	6.66952418958287	1.54441697339629	4.31847377001825	1.57111889726771e-05	0.00378209863060302	82.5	1	standard ATAC-Seq in frozen kidney
peak_72143	chr6	47613502	47614021	9.79057069227111	6.6697418179165	1.54463369352407	4.31800875889192	1.57443183893588e-05	0.00378209863060302	118	0	standard ATAC-Seq in frozen kidney
peak_64469	chr4	146642850	146643113	9.78646975416331	6.66930659071373	1.54460270871642	4.31781360545196	1.57582417992239e-05	0.00378209863060302	61	0	standard ATAC-Seq in frozen kidney
peak_93913	chrY_random	17235715	17236043	9.78646975416331	6.66930659071373	1.54460270871642	4.31781360545196	1.57582417992239e-05	0.00378209863060302	75	0	standard ATAC-Seq in frozen kidney
peak_94016	chrY_random	39696916	39697154	9.78646975416331	6.66930659071373	1.54460270871642	4.31781360545196	1.57582417992239e-05	0.00378209863060302	54	0	standard ATAC-Seq in frozen kidney
peak_2440	chr1	85109528	85109788	9.7823688160555	6.66886793386003	1.54619296097156	4.31308905304393	1.60989234058564e-05	0.00384425129642941	59.5	0	standard ATAC-Seq in frozen kidney
peak_21265	chr12	116842212	116842566	14.9720190985984	4.78826670614435	1.11216174732488	4.30536899660659	1.6670762195536e-05	0.00393091558807672	120	4	standard ATAC-Seq in frozen kidney
peak_93910	chrY_random	17223991	17224191	9.7782678779477	6.66841892795324	1.54948426101349	4.30363773013838	1.68016316106731e-05	0.0039518697670674	46	0	standard ATAC-Seq in frozen kidney
peak_94006	chrY_random	17727425	17727741	9.7762174088938	6.66818873221753	1.55176069022714	4.29717595903365	1.72987874665712e-05	0.00402851935944906	72.5	0	standard ATAC-Seq in frozen kidney
peak_91785	chrUn_random	5103367	5103591	9.55648545242946	6.63487030195136	1.54710888001194	4.28856067447571	1.79834676286671e-05	0.00412225096931069	49.5	0	standard ATAC-Seq in frozen kidney
peak_94000	chrY_random	17674514	17674772	9.55443498337556	6.63464732048825	1.54709440323408	4.28845667505423	1.79918883537909e-05	0.00412225096931069	57	0	standard ATAC-Seq in frozen kidney
peak_65412	chr5	14981273	14981473	9.55853592148336	6.63509377690506	1.54754653008533	4.28749226463594	1.80701548031077e-05	0.00412225096931069	45.5	0.5	standard ATAC-Seq in frozen kidney
peak_94037	chrY_random	40781325	40781593	9.55853592148336	6.63509377690506	1.54754653008533	4.28749226463594	1.80701548031077e-05	0.00412225096931069	59.5	0	standard ATAC-Seq in frozen kidney
peak_19072	chr12	68160204	68160641	9.55238451432166	6.63442389998787	1.54750321004632	4.28717941062578	1.80956139826038e-05	0.00412225096931069	96.5	0	standard ATAC-Seq in frozen kidney
peak_33501	chr16	3116162	3116710	9.55238451432166	6.63442389998787	1.54750321004632	4.28717941062578	1.80956139826038e-05	0.00412225096931069	123.5	1	standard ATAC-Seq in frozen kidney
peak_93982	chrY_random	17540994	17541204	9.55238451432166	6.63442389998787	1.54750321004632	4.28717941062578	1.80956139826038e-05	0.00412225096931069	47.5	0	standard ATAC-Seq in frozen kidney
peak_46660	chr1_random	1134947	1135152	9.55033404526776	6.63419911216679	1.54833943360392	4.28471882081115	1.82970445531737e-05	0.00414805022336444	46	0	standard ATAC-Seq in frozen kidney
peak_27178	chr14	44085458	44085762	9.54828357621386	6.63397204541661	1.54961137990937	4.28105532227352	1.86009105017506e-05	0.00418667335582823	67.5	0	standard ATAC-Seq in frozen kidney
peak_86956	chr8_random	128696	129009	9.772116470786	6.66771316170913	1.55781538879694	4.2801690172405	1.86751432491055e-05	0.00419334964750738	71	0	standard ATAC-Seq in frozen kidney
peak_2447	chr1	85242921	85243132	14.0544511063931	4.08159677466948	0.955876091101564	4.27000613642904	1.95467589391968e-05	0.00434185752466101	65.5	3.5	standard ATAC-Seq in frozen kidney
peak_77920	chr7	54865850	54866106	14.3402954209088	3.66733280798186	0.859011677916338	4.26924674281207	1.96134205752466e-05	0.00434185752466101	80.5	5	standard ATAC-Seq in frozen kidney
peak_21234	chr12	116431871	116432104	14.0973617356002	3.64235727481514	0.853980067442475	4.26515490662841	1.99763555137844e-05	0.00440317368393954	71.5	5.5	standard ATAC-Seq in frozen kidney
peak_86961	chr8_random	394991	395208	14.0932607974924	3.64204079852813	0.853922981098957	4.26506942563018	1.99840052192445e-05	0.00440317368393954	67	5	standard ATAC-Seq in frozen kidney
peak_65408	chr5	14971073	14971628	14.0886918927837	3.64125516665212	0.85502131733219	4.25867179313546	2.05645145818509e-05	0.00448179178162796	167.5	12	standard ATAC-Seq in frozen kidney
peak_72147	chr6	47626484	47626984	9.32240021258782	6.59913493899723	1.5499333218308	4.25768957028567	2.06550491252766e-05	0.00448179178162796	109.5	0	standard ATAC-Seq in frozen kidney
peak_27191	chr14	44760635	44761049	9.32034974353391	6.59890600249009	1.55014269173845	4.2569668183834	2.07219096436993e-05	0.00448179178162796	90.5	0	standard ATAC-Seq in frozen kidney
peak_93912	chrY_random	17232509	17232760	9.32034974353391	6.59890600249009	1.55014269173845	4.2569668183834	2.07219096436993e-05	0.00448179178162796	54.5	0	standard ATAC-Seq in frozen kidney
peak_86970	chr8_random	727841	728431	9.32650115069562	6.599593860695	1.55085126838182	4.25546536617989	2.08614656328045e-05	0.00448608318377023	129	0	standard ATAC-Seq in frozen kidney
peak_93849	chrY_random	5812056	5812276	9.32650115069562	6.599593860695	1.55085126838182	4.25546536617989	2.08614656328045e-05	0.00448608318377023	49	0	standard ATAC-Seq in frozen kidney
peak_86959	chr8_random	386562	386854	13.8280997761662	4.05612139785036	0.953440214806138	4.25419584244733	2.0980162206338e-05	0.00448608318377023	89	3	standard ATAC-Seq in frozen kidney
peak_64457	chr4	145753392	145753671	9.31419833637221	6.59820964684381	1.55348598188305	4.24735705619037	2.16307085410192e-05	0.00457321786890947	60.5	0	standard ATAC-Seq in frozen kidney
peak_93890	chrY_random	17094792	17095017	9.31419833637221	6.59820964684381	1.55348598188305	4.24735705619037	2.16307085410192e-05	0.00457321786890947	49	0	standard ATAC-Seq in frozen kidney
peak_81769	chr7	150237240	150237597	14.6984486590289	-3.00155666623129	0.708239805690886	-4.23805135225812	2.25468205164195e-05	0.00472443767181804	14	93	standard ATAC in FFPE kidney
peak_70836	chr6	3334926	3335266	21.0039578241524	6.31036306461967	1.48938257480156	4.23689867961592	2.26628339709085e-05	0.00473819424107774	165.5	3	standard ATAC-Seq in frozen kidney
peak_8204	chr10	57694517	57695043	14.2743322837822	4.71725106108526	1.11524890477854	4.22977421531025	2.3392597676818e-05	0.00483766787800476	170	6	standard ATAC-Seq in frozen kidney
peak_25822	chr14	6290531	6290746	9.30804692921051	6.59748027078428	1.56118828749792	4.22593502886056	2.3795064512683e-05	0.00483766787800476	47.5	0	standard ATAC-Seq in frozen kidney
peak_66037	chr5	33080645	33080873	13.5965329719793	4.0306922438245	0.953879124187911	4.22557967945471	2.38326475552898e-05	0.00483766787800476	69	4	standard ATAC-Seq in frozen kidney
peak_78121	chr7	67041131	67041496	9.09036544180007	6.56272664589863	1.55316065015406	4.22540105252322	2.38515611125733e-05	0.00483766787800476	76.5	0	standard ATAC-Seq in frozen kidney
peak_33507	chr16	3349918	3350440	9.08831497274617	6.56249157635323	1.55314891450841	4.2252816295019	2.38642139463373e-05	0.00483766787800476	110	0	standard ATAC-Seq in frozen kidney
peak_64470	chr4	146643969	146644178	9.09241591085397	6.56296224900001	1.55364202962688	4.22424350258866	2.3974472559647e-05	0.00483766787800476	44.5	0.5	standard ATAC-Seq in frozen kidney
peak_53850	chr2	181653240	181653494	9.08626450369227	6.56225601651854	1.55360697727555	4.22388423359573	2.40127429931892e-05	0.00483766787800476	54	0	standard ATAC-Seq in frozen kidney
peak_93935	chrY_random	17315095	17315299	9.08626450369227	6.56225601651854	1.55360697727555	4.22388423359573	2.40127429931892e-05	0.00483766787800476	44	0	standard ATAC-Seq in frozen kidney
peak_93977	chrY_random	17501030	17501275	9.08626450369227	6.56225601651854	1.55360697727555	4.22388423359573	2.40127429931892e-05	0.00483766787800476	52.5	0	standard ATAC-Seq in frozen kidney
peak_82572	chr8	19999460	19999813	13.8653269648125	3.6164507969982	0.856361405875337	4.2230427155946	2.4102611715785e-05	0.0048408814543484	106	7.5	standard ATAC-Seq in frozen kidney
peak_65292	chr5	7433477	7433677	9.08216356558447	6.56177936683262	1.55595757457854	4.21719684009379	2.47358039356099e-05	0.00493054796964828	43.5	0	standard ATAC-Seq in frozen kidney
peak_92358	chrX	47955629	47956428	12.6921178205638	-3.65713931660436	0.869367723737698	-4.20666562232276	2.59166166031276e-05	0.00513329061025696	19	187.5	standard ATAC in FFPE kidney
peak_35919	chr16	59359845	59360099	9.07806262747667	6.56128902477742	1.5603079011114	4.20512452709101	2.6093844688377e-05	0.00515753611306003	53.5	0	standard ATAC-Seq in frozen kidney
peak_37355	chr17	13379736	13379954	9.07601215842277	6.56103661994796	1.56327222782339	4.19698917640415	2.70486854922671e-05	0.00525789561398547	46	0	standard ATAC-Seq in frozen kidney
peak_93826	chrX	166432621	166433011	13.3665486702454	4.00446167697725	0.955021980160836	4.19305708157927	2.75220154309277e-05	0.00528386543098897	116	6	standard ATAC-Seq in frozen kidney
peak_7550	chr10	35668906	35669230	8.85628020195843	6.52513445230501	1.55655670075037	4.19203132732617	2.76467807690063e-05	0.00528386543098897	67	0.5	standard ATAC-Seq in frozen kidney
peak_94025	chrY_random	40708002	40708236	8.85628020195843	6.52513445230501	1.55655670075037	4.19203132732617	2.76467807690063e-05	0.00528386543098897	48.5	0	standard ATAC-Seq in frozen kidney
peak_56738	chr3	95848452	95848948	8.85833067101233	6.52537633394909	1.55681468581312	4.19149202112063	2.77125935901359e-05	0.00528386543098897	101.5	0.5	standard ATAC-Seq in frozen kidney
peak_93998	chrY_random	17642398	17642729	8.85833067101233	6.52537633394909	1.55681468581312	4.19149202112063	2.77125935901359e-05	0.00528386543098897	69	0	standard ATAC-Seq in frozen kidney
peak_94052	chrY_random	49254119	49254468	8.85422973290452	6.52489258911807	1.55679440595215	4.19123589098934	2.77439019047921e-05	0.00528386543098897	72.5	0	standard ATAC-Seq in frozen kidney
peak_93863	chrY_random	12229263	12229478	8.86038114006623	6.525619304393	1.55757083668986	4.18961317885303	2.79430385081715e-05	0.00530033244347641	44.5	0	standard ATAC-Seq in frozen kidney
peak_94019	chrY_random	40651836	40652175	8.86243160912013	6.52586441892915	1.55883306085592	4.18637799184598	2.83441179994935e-05	0.0053333993074927	70.5	0	standard ATAC-Seq in frozen kidney
peak_94063	chrY_random	49899464	49899740	8.86243160912013	6.52586441892915	1.55883306085592	4.18637799184598	2.83441179994935e-05	0.0053333993074927	56.5	0	standard ATAC-Seq in frozen kidney
peak_73210	chr6	80255278	80255741	8.85012879479672	6.52440464076035	1.55877367769181	4.18560098501375	2.84412586066065e-05	0.00533665377097483	94.5	1	standard ATAC-Seq in frozen kidney
peak_93943	chrY_random	17346528	17346734	8.84807832574282	6.52415648790748	1.56053761755515	4.18071081050177	2.90599255071325e-05	0.00540325093179356	42.5	0	standard ATAC-Seq in frozen kidney
peak_65813	chr5	26425505	26425763	14.0258937605632	4.69140910236312	1.12336263476296	4.17621964376004	2.96393641239501e-05	0.00549017748440505	80.5	2.5	standard ATAC-Seq in frozen kidney
peak_24220	chr13	74667819	74668157	13.8082122731528	4.66750065858425	1.11837864456591	4.17345295465285	3.00017634519313e-05	0.00549301249603247	106.5	4.5	standard ATAC-Seq in frozen kidney
peak_64455	chr4	145743333	145743764	13.8061618040989	4.66734392491602	1.1183573563687	4.17339225099826	3.00097618375337e-05	0.00549301249603247	135.5	4	standard ATAC-Seq in frozen kidney
peak_8201	chr10	57686678	57687214	13.8020608659911	4.66702931322328	1.11915567249799	4.17013417159948	3.04420360747702e-05	0.00555053891477249	169	4.5	standard ATAC-Seq in frozen kidney
peak_72141	chr6	47604866	47605191	13.8143636803145	4.66797454352067	1.12012866675709	4.16735566373373	3.08153506480299e-05	0.00557911988909002	99.5	3	standard ATAC-Seq in frozen kidney
peak_93867	chrY_random	16932212	16932445	8.84397738763502	6.52364692395839	1.56573844573008	4.1664985245454	3.093138938122e-05	0.00558563897726166	48	0	standard ATAC-Seq in frozen kidney
peak_65162	chr4_random	143013	143306	8.62629590022458	6.48703424876376	1.560956720385	4.15580660504397	3.24141929114239e-05	0.00580825219946	58.5	0	standard ATAC-Seq in frozen kidney
peak_93907	chrY_random	17215715	17216321	8.62014449306288	6.4862864989826	1.5609319698786	4.15539345990016	3.2472823537897e-05	0.00580825219946	121.5	0	standard ATAC-Seq in frozen kidney
peak_93979	chrY_random	17522897	17523105	8.62014449306288	6.4862864989826	1.5609319698786	4.15539345990016	3.2472823537897e-05	0.00580825219946	42.5	0	standard ATAC-Seq in frozen kidney
peak_83668	chr8	56199248	56199543	8.62834636927848	6.48728539240073	1.56202176474016	4.15313380315152	3.27952846107854e-05	0.00585479840993648	59.5	0	standard ATAC-Seq in frozen kidney
peak_93152	chrX	122635341	122635581	8.61809402400898	6.4860354087151	1.56198122498521	4.15244133858043	3.28947091565453e-05	0.00586142598783192	48.5	0	standard ATAC-Seq in frozen kidney
peak_82535	chr8	19713356	19713574	13.359461329882	4.00289473574403	0.964959265694531	4.14825255122344	3.35022700851939e-05	0.0059301145673485	65	3	standard ATAC-Seq in frozen kidney
peak_93852	chrY_random	6746481	6746748	8.61604355495508	6.48578155129838	1.56357464661043	4.14804727446717	3.35323166760137e-05	0.0059301145673485	53.5	0	standard ATAC-Seq in frozen kidney
peak_94033	chrY_random	40745524	40745831	8.63244730738628	6.48779707147457	1.56582129227288	4.14338283908322	3.4221994114606e-05	0.00600691767217253	62.5	0	standard ATAC-Seq in frozen kidney
peak_61195	chr4	79649660	79650015	8.61399308590118	6.48552392285032	1.5657314258898	4.14216883918302	3.44036919353486e-05	0.00601636161403978	72.5	1	standard ATAC-Seq in frozen kidney
peak_64452	chr4	145720491	145720771	13.5675076595486	4.64088370289935	1.12370692461202	4.12997695506924	3.62799598840988e-05	0.00624273980491251	85	2	standard ATAC-Seq in frozen kidney
peak_59237	chr4	6844721	6844937	14.6212430071406	3.05664947379287	0.740130474503978	4.12987922952555	3.62953846421473e-05	0.00624273980491251	66	7	standard ATAC-Seq in frozen kidney
peak_93828	chrX	166437491	166437696	13.5622921855886	4.64143703175438	1.12530432438114	4.12460605650558	3.71369840493563e-05	0.00633330990185886	62	2.5	standard ATAC-Seq in frozen kidney
peak_93892	chrY_random	17100121	17100522	8.39016019132903	6.44713205049391	1.564530371774	4.12080977576906	3.77543058001562e-05	0.00633330990185886	80	0	standard ATAC-Seq in frozen kidney
peak_37365	chr17	13554179	13554379	8.39221066038293	6.44738873126117	1.56481503547039	4.12022417034294	3.78503953262662e-05	0.00633330990185886	38.5	0	standard ATAC-Seq in frozen kidney
peak_93874	chrY_random	17028129	17028681	8.39221066038293	6.44738873126117	1.56481503547039	4.12022417034294	3.78503953262662e-05	0.00633330990185886	111	0	standard ATAC-Seq in frozen kidney
peak_93908	chrY_random	17216803	17217134	8.39221066038293	6.44738873126117	1.56481503547039	4.12022417034294	3.78503953262662e-05	0.00633330990185886	65	0	standard ATAC-Seq in frozen kidney
peak_94030	chrY_random	40735141	40735407	8.39221066038293	6.44738873126117	1.56481503547039	4.12022417034294	3.78503953262662e-05	0.00633330990185886	52	0	standard ATAC-Seq in frozen kidney
peak_27177	chr14	44040306	44040704	8.38810972227513	6.44687537963042	1.56480278215498	4.11992837254038	3.78990197458259e-05	0.00633330990185886	77	0	standard ATAC-Seq in frozen kidney
peak_71463	chr6	28879230	28879640	8.38810972227513	6.44687537963042	1.56480278215498	4.11992837254038	3.78990197458259e-05	0.00633330990185886	78.5	1	standard ATAC-Seq in frozen kidney
peak_83670	chr8	56208395	56209021	8.38810972227513	6.44687537963042	1.56480278215498	4.11992837254038	3.78990197458259e-05	0.00633330990185886	123	0	standard ATAC-Seq in frozen kidney
peak_93856	chrY_random	6769293	6769495	8.38810972227513	6.44687537963042	1.56480278215498	4.11992837254038	3.78990197458259e-05	0.00633330990185886	39.5	0	standard ATAC-Seq in frozen kidney
peak_94035	chrY_random	40752243	40752497	8.38810972227513	6.44687537963042	1.56480278215498	4.11992837254038	3.78990197458259e-05	0.00633330990185886	50	0	standard ATAC-Seq in frozen kidney
peak_94078	chrY_random	55372959	55373166	8.38810972227513	6.44687537963042	1.56480278215498	4.11992837254038	3.78990197458259e-05	0.00633330990185886	40.5	0	standard ATAC-Seq in frozen kidney
peak_59165	chr4	4169400	4169968	12.90247912867	3.95018356296154	0.959131979199488	4.11849844299681	3.81349146039134e-05	0.00635326428680384	161	10.5	standard ATAC-Seq in frozen kidney
peak_71333	chr6	23081945	23082250	12.9061121001769	3.95000976629494	0.959269910449391	4.11772507744402	3.82630764550816e-05	0.00635326428680384	86.5	3	standard ATAC-Seq in frozen kidney
peak_46659	chr1_random	1117396	1117786	8.38605925322123	6.44661754159998	1.56563576801398	4.11757170684568	3.82885415071562e-05	0.00635326428680384	78.5	0	standard ATAC-Seq in frozen kidney
peak_94009	chrY_random	21047794	21047994	8.38605925322123	6.44661754159998	1.56563576801398	4.11757170684568	3.82885415071562e-05	0.00635326428680384	40	0	standard ATAC-Seq in frozen kidney
peak_65413	chr5	14988834	14989414	8.39631159849074	6.44790680956797	1.56707426562173	4.11461470015896	3.87826676753333e-05	0.00640138547876909	116.5	0	standard ATAC-Seq in frozen kidney
peak_93861	chrY_random	8611181	8611478	8.39631159849074	6.44790680956797	1.56707426562173	4.11461470015896	3.87826676753333e-05	0.00640138547876909	59	0	standard ATAC-Seq in frozen kidney
peak_91797	chrUn_random	5732264	5732628	14.613041130925	3.0560138127296	0.74335800571236	4.11109289096984	3.93790721527895e-05	0.00648844351199807	111.5	12	standard ATAC-Seq in frozen kidney
peak_70968	chr6	6973963	6974323	8.38195831511343	6.44609376521951	1.56903140511198	4.10832679589319	3.98535919684881e-05	0.00654370941216626	71	0	standard ATAC-Seq in frozen kidney
peak_86967	chr8_random	682486	682734	18.6774587091133	6.1386523845679	1.49498471129876	4.10616398828253	4.02283936888244e-05	0.00659374209656039	106.5	1	standard ATAC-Seq in frozen kidney
peak_93918	chrY_random	17258894	17259101	8.37990784605953	6.44582571324731	1.57161841234317	4.10139360968483	4.10669315069359e-05	0.00668460227848971	41	0	standard ATAC-Seq in frozen kidney
peak_93868	chrY_random	16932713	16932936	8.37785737700563	6.44555214744854	1.5748674472041	4.09275851049653	4.26271596374495e-05	0.00683218238529839	44.5	0	standard ATAC-Seq in frozen kidney
peak_65410	chr5	14973324	14974114	13.1100574917357	4.58958525141074	1.12364234665556	4.08456059445546	4.41603019835973e-05	0.00703229390756811	231	7	standard ATAC-Seq in frozen kidney
peak_70835	chr6	3295884	3296316	8.15812542054129	6.40662250317214	1.56921694867968	4.08268755226139	4.4517858222471e-05	0.00703229390756811	83.5	0.5	standard ATAC-Seq in frozen kidney
peak_72149	chr6	47635102	47635673	8.15812542054129	6.40662250317214	1.56921694867968	4.08268755226139	4.4517858222471e-05	0.00703229390756811	110.5	0	standard ATAC-Seq in frozen kidney
peak_84079	chr8	71996523	71996789	8.15812542054129	6.40662250317214	1.56921694867968	4.08268755226139	4.4517858222471e-05	0.00703229390756811	50	0	standard ATAC-Seq in frozen kidney
peak_94051	chrY_random	49253448	49253676	8.15812542054129	6.40662250317214	1.56921694867968	4.08268755226139	4.4517858222471e-05	0.00703229390756811	43.5	0	standard ATAC-Seq in frozen kidney
peak_91789	chrUn_random	5336970	5337184	8.15607495148739	6.40635775098007	1.56921334185744	4.08252821977476	4.45484005496274e-05	0.00703229390756811	40.5	0	standard ATAC-Seq in frozen kidney
peak_93857	chrY_random	6779987	6780199	8.15607495148739	6.40635775098007	1.56921334185744	4.08252821977476	4.45484005496274e-05	0.00703229390756811	41	0	standard ATAC-Seq in frozen kidney
peak_33499	chr16	3114490	3114731	8.16017588959519	6.4068878768201	1.56981396085925	4.08130392299048	4.47837490514516e-05	0.00703681579957126	45	0	standard ATAC-Seq in frozen kidney
peak_93848	chrY	2689125	2689488	8.16017588959519	6.4068878768201	1.56981396085925	4.08130392299048	4.47837490514516e-05	0.00703681579957126	69	0	standard ATAC-Seq in frozen kidney
peak_27189	chr14	44655519	44655809	8.15402448243349	6.40609238612802	1.56980343299923	4.08082454877086	4.48762207810418e-05	0.00703681579957126	56	0	standard ATAC-Seq in frozen kidney
peak_85343	chr8	98640409	98640642	8.15402448243349	6.40609238612802	1.56980343299923	4.08082454877086	4.48762207810418e-05	0.00703681579957126	44	0	standard ATAC-Seq in frozen kidney
peak_82581	chr8	22135881	22136541	12.6699763912813	3.92173498263969	0.961346421907388	4.07941912849549	4.51483725188925e-05	0.0070560372698235	185.5	10.5	standard ATAC-Seq in frozen kidney
peak_82563	chr8	19949211	19949497	13.1064245202287	4.58977917675504	1.12521343184509	4.07902985056696	4.52240303811955e-05	0.00705607371534663	84.5	3	standard ATAC-Seq in frozen kidney
peak_2449	chr1	85255230	85255505	8.15197401337959	6.40582517924596	1.57099479418928	4.07755977482517	4.55108318550957e-05	0.00707734808830242	52.5	0	standard ATAC-Seq in frozen kidney
peak_94042	chrY_random	40811567	40811896	8.15197401337959	6.40582517924596	1.57099479418928	4.07755977482517	4.55108318550957e-05	0.00707734808830242	64	0	standard ATAC-Seq in frozen kidney
peak_93158	chrX	122679407	122679616	8.14992354432569	6.40555492255294	1.57280270300262	4.07270086090528	4.64710936435402e-05	0.00716744246436917	39.5	0	standard ATAC-Seq in frozen kidney
peak_94080	chrY_random	55470445	55470749	8.14992354432569	6.40555492255294	1.57280270300262	4.07270086090528	4.64710936435402e-05	0.00716744246436917	59	0	standard ATAC-Seq in frozen kidney
peak_83676	chr8	57997952	57998313	18.1944669794518	6.10046217617667	1.49825763814089	4.07170437238446	4.66703884395735e-05	0.00718639959993517	150.5	1.5	standard ATAC-Seq in frozen kidney
peak_41334	chr18	19010279	19011120	14.3810063601372	3.03008634735941	0.744928481075687	4.06762048214873	4.74956529116037e-05	0.00727636450113001	251	26	standard ATAC-Seq in frozen kidney
peak_64466	chr4	146593455	146594067	14.3810063601372	3.03008634735941	0.744928481075687	4.06762048214873	4.74956529116037e-05	0.00727636450113001	184.5	17.5	standard ATAC-Seq in frozen kidney
peak_93864	chrY_random	16882559	16882820	8.14787307527179	6.40528045979696	1.57527246867719	4.06614131025579	4.77979598668873e-05	0.0073002848346694	50	0	standard ATAC-Seq in frozen kidney
peak_78120	chr7	67034262	67034490	8.14582260621788	6.40500091820499	1.5783561279996	4.0580201163616	4.9490505752042e-05	0.00747386075869883	43.5	0	standard ATAC-Seq in frozen kidney
peak_24219	chr13	74665920	74667696	12.8739217828401	4.56236846087112	1.12533986689631	4.0542138380418	5.03031861838487e-05	0.00758441452842154	514.5	16	standard ATAC-Seq in frozen kidney
peak_78117	chr7	67003095	67003534	12.8755042852931	4.56200222808881	1.12691559287211	4.0482199882086	5.16086281756762e-05	0.00776879130344343	125	3	standard ATAC-Seq in frozen kidney
peak_46645	chr1_random	801865	802131	7.92404018069964	6.36467001448746	1.57424789065158	4.04299097510819	5.27736526995329e-05	0.00786574846779934	49	0	standard ATAC-Seq in frozen kidney
peak_93904	chrY_random	17194645	17195070	7.92404018069964	6.36467001448746	1.57424789065158	4.04299097510819	5.27736526995329e-05	0.00786574846779934	79.5	0	standard ATAC-Seq in frozen kidney
peak_94015	chrY_random	39693477	39693769	7.92404018069964	6.36467001448746	1.57424789065158	4.04299097510819	5.27736526995329e-05	0.00786574846779934	54	0	standard ATAC-Seq in frozen kidney
peak_21293	chr12	117137078	117137460	7.92198971164574	6.36439624429171	1.57456339838842	4.04200697844605	5.29956550704389e-05	0.00787676179461628	71	0.5	standard ATAC-Seq in frozen kidney
peak_61030	chr4	65168625	65168985	7.92814111880745	6.36521883984775	1.57551686954714	4.04008294857378	5.34323003942685e-05	0.00790669853949091	66.5	1	standard ATAC-Seq in frozen kidney
peak_94049	chrY_random	49227904	49228708	7.91993924259184	6.36412118086788	1.57551538293621	4.03939006232195	5.359037933972e-05	0.00790669853949091	151.5	0	standard ATAC-Seq in frozen kidney
peak_94057	chrY_random	49427528	49427823	7.91993924259184	6.36412118086788	1.57551538293621	4.03939006232195	5.359037933972e-05	0.00790669853949091	54.5	0	standard ATAC-Seq in frozen kidney
peak_91795	chrUn_random	5727467	5727699	12.4399920895475	3.89342706481738	0.963893169969128	4.03927238631858	5.36172705823071e-05	0.00790669853949091	64	3	standard ATAC-Seq in frozen kidney
peak_94022	chrY_random	40700016	40700421	7.93019158786135	6.36549646155826	1.57711704845047	4.03615981947087	5.43332113649081e-05	0.00796073575705022	76	0	standard ATAC-Seq in frozen kidney
peak_46649	chr1_random	822126	822510	7.91788877353794	6.36384354351299	1.57711653323773	4.03511307464921	5.45760080279901e-05	0.00796073575705022	71	0	standard ATAC-Seq in frozen kidney
peak_76575	chr7	17253869	17254107	7.91788877353794	6.36384354351299	1.57711653323773	4.03511307464921	5.45760080279901e-05	0.00796073575705022	44.5	0	standard ATAC-Seq in frozen kidney
peak_93993	chrY_random	17604492	17604873	7.91788877353794	6.36384354351299	1.57711653323773	4.03511307464921	5.45760080279901e-05	0.00796073575705022	71	0	standard ATAC-Seq in frozen kidney
peak_94013	chrY_random	21203962	21204167	7.91788877353794	6.36384354351299	1.57711653323773	4.03511307464921	5.45760080279901e-05	0.00796073575705022	38	0	standard ATAC-Seq in frozen kidney
peak_94020	chrY_random	40670104	40670373	7.91788877353794	6.36384354351299	1.57711653323773	4.03511307464921	5.45760080279901e-05	0.00796073575705022	50.5	0	standard ATAC-Seq in frozen kidney
peak_67571	chr5	81997742	81998482	13.4227274287034	3.21255511433121	0.796822398502176	4.03170784401894	5.53729957597349e-05	0.00800595609548458	210.5	20	standard ATAC-Seq in frozen kidney
peak_82556	chr8	19917119	19917333	17.4967801646355	6.04343024739461	1.49951245791274	4.03026344696517	5.57143735879231e-05	0.00800595609548458	86.5	1	standard ATAC-Seq in frozen kidney
peak_83675	chr8	57990727	57990959	7.91583830448404	6.36356213014937	1.57938867096595	4.02912990774932	5.59836765914658e-05	0.00800595609548458	43.5	0	standard ATAC-Seq in frozen kidney
peak_91809	chrX	4261120	4261363	7.91583830448404	6.36356213014937	1.57938867096595	4.02912990774932	5.59836765914658e-05	0.00800595609548458	45	0	standard ATAC-Seq in frozen kidney
peak_93896	chrY_random	17135229	17135475	7.91583830448404	6.36356213014937	1.57938867096595	4.02912990774932	5.59836765914658e-05	0.00800595609548458	46	0	standard ATAC-Seq in frozen kidney
peak_94031	chrY_random	40737055	40737567	7.91583830448404	6.36356213014937	1.57938867096595	4.02912990774932	5.59836765914658e-05	0.00800595609548458	95.5	0	standard ATAC-Seq in frozen kidney
peak_77914	chr7	54839062	54839342	12.8616189685167	4.5613324297739	1.13210996052297	4.02905423397815	5.60016987870949e-05	0.00800595609548458	80.5	2.5	standard ATAC-Seq in frozen kidney
peak_46658	chr1_random	1112626	1112826	14.1453386178426	3.0038107136857	0.746681798159603	4.02287925203131	5.74909745547532e-05	0.00817057909219766	59.5	7	standard ATAC-Seq in frozen kidney
peak_65286	chr5	5944782	5945333	12.6357356048907	4.53445425700045	1.12867229629358	4.01751178964084	5.88158935973987e-05	0.00833369836946395	156.5	5	standard ATAC-Seq in frozen kidney
peak_77605	chr7	50432775	50433010	7.91173736637624	6.36298348760432	1.58605203284189	4.01183779336867	6.02478921302588e-05	0.00848548268756158	43	0	standard ATAC-Seq in frozen kidney
peak_54707	chr3	35579282	35579972	17.0383940636209	6.00412107538072	1.4997246744257	4.00348222428221	6.24168930128954e-05	0.00869087185549267	269.5	3	standard ATAC-Seq in frozen kidney
peak_40864	chr18	4199024	4199260	7.6920054099119	6.32174293991691	1.58000804434799	4.00108275557905	6.30532995590684e-05	0.00869087185549267	42	0	standard ATAC-Seq in frozen kidney
peak_61515	chr4	88419224	88419953	7.6920054099119	6.32174293991691	1.58000804434799	4.00108275557905	6.30532995590684e-05	0.00869087185549267	132	0	standard ATAC-Seq in frozen kidney
peak_74706	chr6	115972184	115972413	7.6920054099119	6.32174293991691	1.58000804434799	4.00108275557905	6.30532995590684e-05	0.00869087185549267	40.5	0.5	standard ATAC-Seq in frozen kidney
peak_93866	chrY_random	16920800	16921075	7.689954940858	6.32145977557679	1.58001105148876	4.00089592387371	6.31031094879877e-05	0.00869087185549267	49.5	0	standard ATAC-Seq in frozen kidney
peak_94012	chrY_random	21171005	21171205	7.689954940858	6.32145977557679	1.58001105148876	4.00089592387371	6.31031094879877e-05	0.00869087185549267	36.5	0	standard ATAC-Seq in frozen kidney
peak_94034	chrY_random	40749751	40750068	7.689954940858	6.32145977557679	1.58001105148876	4.00089592387371	6.31031094879877e-05	0.00869087185549267	57	0	standard ATAC-Seq in frozen kidney
peak_4399	chr1	153045918	153046225	12.7031026418199	3.47926839243844	0.869866781628191	3.99977153504592	6.34036626487246e-05	0.00869087185549267	84.5	7	standard ATAC-Seq in frozen kidney
peak_46652	chr1_random	872468	872806	7.6940558789658	6.32202677171746	1.5806819481088	3.99955650741848	6.34612944392022e-05	0.00869087185549267	60	0	standard ATAC-Seq in frozen kidney
peak_77606	chr7	50453529	50453733	7.6940558789658	6.32202677171746	1.5806819481088	3.99955650741848	6.34612944392022e-05	0.00869087185549267	37.5	0	standard ATAC-Seq in frozen kidney
peak_93909	chrY_random	17217321	17217653	7.6879044718041	6.32117592562982	1.58069137143307	3.99899438933419	6.3612187896954e-05	0.00869887423533303	60.5	0	standard ATAC-Seq in frozen kidney
peak_82562	chr8	19941435	19941637	12.2079573187597	3.86437154274867	0.966634044371064	3.99776064711542	6.39445618738718e-05	0.00871942651379447	54.5	3	standard ATAC-Seq in frozen kidney
peak_171	chr1	11141544	11142016	7.6858540027502	6.32089004146483	1.58205851353139	3.99535793866162	6.45965825931863e-05	0.00871942651379447	86	0.5	standard ATAC-Seq in frozen kidney
peak_27179	chr14	44097211	44098054	7.6858540027502	6.32089004146483	1.58205851353139	3.99535793866162	6.45965825931863e-05	0.00871942651379447	151	0	standard ATAC-Seq in frozen kidney
peak_91800	chrUn_random	5811103	5811313	7.6858540027502	6.32089004146483	1.58205851353139	3.99535793866162	6.45965825931863e-05	0.00871942651379447	37.5	0	standard ATAC-Seq in frozen kidney
peak_93851	chrY_random	6744274	6744550	7.6858540027502	6.32089004146483	1.58205851353139	3.99535793866162	6.45965825931863e-05	0.00871942651379447	49.5	0	standard ATAC-Seq in frozen kidney
peak_94021	chrY_random	40681744	40682097	7.6858540027502	6.32089004146483	1.58205851353139	3.99535793866162	6.45965825931863e-05	0.00871942651379447	64.5	0	standard ATAC-Seq in frozen kidney
peak_94074	chrY_random	54762414	54762722	7.6858540027502	6.32089004146483	1.58205851353139	3.99535793866162	6.45965825931863e-05	0.00871942651379447	56	0	standard ATAC-Seq in frozen kidney
peak_177	chr1	11404027	11404581	12.1981729400911	3.86401036352024	0.967487002822344	3.99386281391707	6.50054840596724e-05	0.00876205008135552	148.5	9	standard ATAC-Seq in frozen kidney
peak_64490	chr4	146810954	146811607	12.4057513031568	4.50669464156438	1.12958618935563	3.9896863860696	6.6160713357785e-05	0.00887959828079955	182	4	standard ATAC-Seq in frozen kidney
peak_61194	chr4	79648653	79649025	12.4103202078655	4.50760298101378	1.13159744444968	3.98339798584992	6.79368416260977e-05	0.00904029871459593	103	4	standard ATAC-Seq in frozen kidney
peak_23998	chr13	68119468	68119680	7.68175306464239	6.32030693981988	1.58696438539274	3.98263943286651	6.81541153398489e-05	0.00904029871459593	38	0	standard ATAC-Seq in frozen kidney
peak_65444	chr5	15185471	15185928	12.4701319378304	3.44917003545564	0.870797962114412	3.96093030245569	7.4658323979422e-05	0.00968838495855995	123	8.5	standard ATAC-Seq in frozen kidney
peak_27094	chr14	39574993	39575252	7.45997063912415	6.27750096236274	1.58659523755119	3.95658628854305	7.60284334285394e-05	0.00977500658164707	45	0.5	standard ATAC-Seq in frozen kidney
peak_27184	chr14	44510625	44511072	7.45997063912415	6.27750096236274	1.58659523755119	3.95658628854305	7.60284334285394e-05	0.00977500658164707	78	0	standard ATAC-Seq in frozen kidney
peak_93911	chrY_random	17226098	17226399	7.45997063912415	6.27750096236274	1.58659523755119	3.95658628854305	7.60284334285394e-05	0.00977500658164707	53	0	standard ATAC-Seq in frozen kidney
peak_84080	chr8	71998455	71999072	7.45586970101635	6.27691363516244	1.58660873923351	3.95618244116997	7.61570084324193e-05	0.00977500658164707	105	2	standard ATAC-Seq in frozen kidney
peak_94082	chrY_random	56691405	56691702	7.46202110817805	6.27779601481762	1.58768044144191	3.95406773992644	7.68336408984923e-05	0.00979413247556903	52	0	standard ATAC-Seq in frozen kidney
peak_17980	chr12	19562174	19562512	7.45381923196245	6.27661853182375	1.58770837548282	3.95325654808304	7.70946999756173e-05	0.00979413247556903	59.5	0	standard ATAC-Seq in frozen kidney
peak_27173	chr14	44016280	44016491	7.45381923196245	6.27661853182375	1.58770837548282	3.95325654808304	7.70946999756173e-05	0.00979413247556903	36.5	0	standard ATAC-Seq in frozen kidney
peak_94047	chrY_random	49220405	49220619	7.45381923196245	6.27661853182375	1.58770837548282	3.95325654808304	7.70946999756173e-05	0.00979413247556903	37.5	0	standard ATAC-Seq in frozen kidney
peak_94081	chrY_random	55500693	55500963	7.45381923196245	6.27661853182375	1.58770837548282	3.95325654808304	7.70946999756173e-05	0.00979413247556903	47.5	0	standard ATAC-Seq in frozen kidney
peak_86957	chr8_random	138816	139194	7.45176876290855	6.27632059221888	1.58955453561546	3.94847767194646	7.86497500831053e-05	0.00990852322259211	67	0	standard ATAC-Seq in frozen kidney
peak_93996	chrY_random	17618594	17618808	7.45176876290855	6.27632059221888	1.58955453561546	3.94847767194646	7.86497500831053e-05	0.00990852322259211	37.5	0	standard ATAC-Seq in frozen kidney
peak_94014	chrY_random	39691838	39692081	7.45176876290855	6.27632059221888	1.58955453561546	3.94847767194646	7.86497500831053e-05	0.00990852322259211	42	0	standard ATAC-Seq in frozen kidney
peak_91758	chrUn_random	4062809	4064284	12.1675651252074	4.47766742182004	1.13412945457384	3.94810963048532	7.87707328639661e-05	0.00990852322259211	406	17.5	standard ATAC-Seq in frozen kidney
peak_21781	chr13	13031814	13032103	12.1895030972746	3.86267767234001	0.978488677550538	3.94759567582273	7.8939974731032e-05	0.00991576721311039	77.5	3	standard ATAC-Seq in frozen kidney

## Sheet: README
Supplemental Table S2: List of differential accessible chromatin peaks between standard ATAC-Seq on FFPE mouse kidney and standard ATAC-Seq on frozen mouse kidney.
