# Supplementary material for: Profiling chromatin accessibility in formalin-fixed paraffin-embedded samples
Source: HighWire-hosted journal article supplement (doi:10.1101/gr.275269.121), 2021-07-14
Supplement: Supplemental_Table_S3.xlsx [file Supplemental_Table_S3.xlsx]

## Sheet: Supplemental_Table_S3
	chr	start	end	baseMean	log2FoldChange	lfcSE	stat	pvalue	padj	readcounts (FFPE-ATAC in frozen liver)	readcounts (standard ATAC-Seq in frozen liver)	Group
peak_56887	chr2	98506348	98507562	5628.06913095041	7.11363734329421	0.161047094106631	44.1711623718228	0	0	1697	173217	standard ATAC-Seq in frozen liver
peak_19719	chr12	3109725	3110244	2778.8041409445	7.07163382078498	0.195680469858978	36.1386796846988	5.60317040755964e-286	2.9959872010701e-281	371.5	36598.5	standard ATAC-Seq in frozen liver
peak_552	chr1	24618411	24623011	1785.27211562118	5.94466628258746	0.168239181002586	35.3346125864466	1.72780767705295e-273	6.15900083921217e-269	4557	205998	standard ATAC-Seq in frozen liver
peak_99535	chr9	35112672	35113324	1808.8453003028	6.12056130675505	0.176246518356571	34.7272749772696	3.05416623442202e-264	8.1652370735714e-260	577.5	29676.5	standard ATAC-Seq in frozen liver
peak_56884	chr2	98502310	98503186	1763.13723977663	5.69314404828015	0.164572031059538	34.5936305921905	3.14986873257249e-262	6.73687624785139e-258	1019.5	38678	standard ATAC-Seq in frozen liver
peak_98580	chr9	3024055	3024661	1838.71776900412	6.22296987150332	0.181196357283445	34.3437912593836	1.74350302573552e-258	3.10747450115217e-254	514	28079.5	standard ATAC-Seq in frozen liver
peak_98579	chr9	3023446	3023758	1647.30159510892	5.90916408190901	0.176786308973933	33.4254621650611	5.85083833145196e-245	8.93832571895916e-241	293.5	12914.5	standard ATAC-Seq in frozen liver
peak_98570	chr9	3006634	3006907	1443.7605713239	5.8160063165173	0.179117668001574	32.4703106142839	2.79982535934479e-231	3.74263155128716e-227	240	9891	standard ATAC-Seq in frozen liver
peak_98578	chr9	3020833	3021139	1312.63581980249	5.55123388783607	0.175809110497909	31.5753482405685	8.0498910372805e-219	9.56496997373044e-215	293	10045	standard ATAC-Seq in frozen liver
peak_98576	chr9	3017857	3018098	1201.79823169642	5.35066023041887	0.173483924463375	30.8423979165197	7.08372335876647e-209	7.57526292263128e-205	241.5	7220	standard ATAC-Seq in frozen liver
peak_56886	chr2	98505097	98505429	1213.55052117407	5.64073710172992	0.184120697556908	30.6360837025749	4.04986821237243e-206	3.93717142511723e-202	275.5	10090	standard ATAC-Seq in frozen liver
peak_98569	chr9	3004534	3004794	1102.50288856856	5.1779382018247	0.169699808836203	30.5123396268674	1.78770101344319e-204	1.59312465563834e-200	269	7117	standard ATAC-Seq in frozen liver
peak_98573	chr9	3014041	3014370	1184.41289907507	5.3756565222431	0.176272948624305	30.4962080920333	2.92571501035648e-204	2.40671567301932e-200	317.5	9718.5	standard ATAC-Seq in frozen liver
peak_98575	chr9	3016970	3017219	1158.34356755359	5.33083254200805	0.175453402777322	30.3831812756217	9.16288201610623e-203	6.99906742800274e-199	242	7187.5	standard ATAC-Seq in frozen liver
peak_98565	chr9	3000009	3001611	1103.58913704785	5.52876624310961	0.183434212298743	30.1403221014486	1.43644643086699e-199	1.02408096580323e-195	1304	44181	standard ATAC-Seq in frozen liver
peak_98568	chr9	3004027	3004279	1078.10332696503	5.27226023168219	0.176468323511856	29.8765247312386	3.97224579583807e-196	2.65492495725704e-192	236	6761.5	standard ATAC-Seq in frozen liver
peak_98566	chr9	3001970	3002382	1022.47207942413	5.47354407962686	0.188265693875317	29.0735075889707	7.76485076230724e-186	4.88450220982573e-182	324.5	10528.5	standard ATAC-Seq in frozen liver
peak_98577	chr9	3018335	3018693	1022.19358487629	5.13416977579099	0.176662411794301	29.0620382889883	1.0841570735396e-185	6.44103740484731e-182	351.5	9090.5	standard ATAC-Seq in frozen liver
peak_98581	chr9	3025486	3025948	1003.05816865914	5.21495847911428	0.18043463391858	28.9022033401165	1.12018104193791e-183	6.30479160230516e-180	423	11529	standard ATAC-Seq in frozen liver
peak_98574	chr9	3015231	3015462	953.35549833157	4.99586962585504	0.172923240694016	28.8906777701162	1.56351450215729e-183	8.36003386730993e-180	231.5	5452	standard ATAC-Seq in frozen liver
peak_98567	chr9	3003301	3003689	960.853470127732	5.38201762198246	0.188347880660447	28.5748775250896	1.37902758985165e-179	7.02246816338789e-176	305	9302.5	standard ATAC-Seq in frozen liver
peak_43872	chr17	39979979	39985735	1003.49365332863	4.25520655557853	0.150609936978536	28.2531593926964	1.3016568376474e-175	6.32717638914431e-172	9988.5	139865.5	standard ATAC-Seq in frozen liver
peak_84300	chr6	103598904	103599430	960.559547036043	6.02934129254148	0.2166481482186	27.8301076751314	1.87540083935595e-170	8.71971697216895e-167	268	12714.5	standard ATAC-Seq in frozen liver
peak_98582	chr9	3032103	3032764	754.867102729431	5.09980637807227	0.19508242229161	26.1418036446618	1.22143942891939e-150	5.44247962871711e-147	495.5	12394	standard ATAC-Seq in frozen liver
peak_98583	chr9	3034751	3035416	700.066369574542	5.00320110435891	0.192842903291782	25.9444398469192	2.10094122754121e-148	8.98690215728119e-145	491	11529.5	standard ATAC-Seq in frozen liver
peak_18676	chr11	108872815	108873555	578.006201465508	4.14196468303247	0.177335335309228	23.3566800198615	1.1787579116237e-120	4.84827662735103e-117	795	10326	standard ATAC-Seq in frozen liver
peak_49443	chr18	90771443	90772110	868.725749857589	7.3353136515221	0.316518812033685	23.1749689833331	8.14427247856079e-119	3.22570501698079e-115	126.5	14682.5	standard ATAC-Seq in frozen liver
peak_98572	chr9	3012743	3013378	517.473677684193	4.5510538759108	0.200391974847422	22.7107591477951	3.50731372177592e-114	1.33953079318927e-110	468	8041.5	standard ATAC-Seq in frozen liver
peak_98586	chr9	3037739	3038294	518.466417362305	4.83040311808566	0.21512566477115	22.4538672464963	1.17308878185008e-111	4.32582556007812e-108	344	7106	standard ATAC-Seq in frozen liver
peak_98571	chr9	3009296	3009975	497.065749304806	4.57189454931769	0.205903256946597	22.2040904894645	3.13576103320409e-109	1.11778383043271e-105	475	8272	standard ATAC-Seq in frozen liver
peak_7389	chr1	197067513	197068265	457.544793676218	4.56902909249664	0.211612071632722	21.5915333054663	2.15735531133219e-103	7.44211031092107e-100	486.5	8420.5	standard ATAC-Seq in frozen liver
peak_104304	chrUn_random	5813063	5813476	416.345104890215	5.24517345880263	0.255162592537698	20.5562006822286	6.77337043112353e-94	2.2635545641685e-90	154.5	4274.5	standard ATAC-Seq in frozen liver
peak_22863	chr12	98299503	98300134	381.215522717843	4.48734158616161	0.228555133636896	19.6335191196826	7.99786219577924e-86	2.59176783440738e-82	352.5	5866.5	standard ATAC-Seq in frozen liver
peak_56885	chr2	98503866	98504234	377.479992812086	4.0891289849708	0.215028586580439	19.0166761080445	1.2410630827584e-80	3.90347191197353e-77	267.5	3347	standard ATAC-Seq in frozen liver
peak_60925	chr2	181747301	181748059	500.523679089676	7.03524658312127	0.375160530546043	18.7526299018757	1.84250133506151e-78	5.62957857914693e-75	104.5	9602	standard ATAC-Seq in frozen liver
peak_79965	chr5	147072426	147073062	384.998058955228	3.76938297328235	0.203060173553772	18.5628865932403	6.41626331895569e-77	1.90596884184945e-73	583	5818.5	standard ATAC-Seq in frozen liver
peak_13134	chr11	3023537	3024368	345.370274180269	4.05410211311184	0.222386461134582	18.2299861800419	2.98396486332575e-74	8.62438428430249e-71	570	6900	standard ATAC-Seq in frozen liver
peak_60967	chr3	5860202	5860952	390.587276170909	3.57082108022647	0.196391818139964	18.1821275145059	7.15050932831904e-74	2.01228504489766e-70	783.5	6881.5	standard ATAC-Seq in frozen liver
peak_38211	chr16	11143864	11144543	384.660812381884	3.50123140224605	0.197061802581669	17.7671743401161	1.26925154062845e-70	3.48032026931452e-67	734.5	6121	standard ATAC-Seq in frozen liver
peak_106858	chrX	166527082	166527610	381.984259978736	6.47997283726345	0.365552569708327	17.7265142532955	2.61769042702945e-70	6.99832991440256e-67	78	5088.5	standard ATAC-Seq in frozen liver
peak_98584	chr9	3035684	3036417	296.108885451859	4.04306330072743	0.240420885395754	16.8166059869224	1.84426133041121e-63	4.81032835153279e-60	433.5	5220.5	standard ATAC-Seq in frozen liver
peak_104257	chrUn_random	5249058	5249770	259.568970286551	4.39089537113276	0.274071293951293	16.0209969742876	9.11765882252458e-58	2.32150789719513e-54	294	4506.5	standard ATAC-Seq in frozen liver
peak_40536	chr16	57391098	57391930	328.54771822687	3.29818066096086	0.207368931869176	15.9048929424085	5.86033998208426e-57	1.45743929614909e-53	873.5	6324.5	standard ATAC-Seq in frozen liver
peak_104283	chrUn_random	5495437	5497270	259.065928281047	4.14956353781729	0.262680646482653	15.7969899700674	3.26330492809409e-56	7.9312401296694e-53	889.5	11476	standard ATAC-Seq in frozen liver
peak_35771	chr15	74915844	74917575	243.774358086943	3.89265561771787	0.259495910295364	15.0008360952092	7.25002593797629e-51	1.72291227506944e-47	923.5	10091.5	standard ATAC-Seq in frozen liver
peak_104158	chrUn_random	3632173	3632586	221.881862587674	4.57872493611955	0.305862359872782	14.9698869060711	1.15517522098112e-50	2.68550615122825e-47	129	2246.5	standard ATAC-Seq in frozen liver
peak_98585	chr9	3037061	3037549	240.151798608497	3.86961511061121	0.259545955465175	14.9091713013822	2.87296055426733e-50	6.53684103644242e-47	261	2798	standard ATAC-Seq in frozen liver
peak_53644	chr2	22442917	22443944	219.000841788159	4.25214604009926	0.289252118381662	14.7004836607234	6.4000949806723e-49	1.42587449403774e-45	389	5438.5	standard ATAC-Seq in frozen liver
peak_53645	chr2	22444042	22445766	222.537230643614	3.96735411549329	0.275472778270266	14.4019824405333	5.02803178852258e-47	1.09733202333228e-43	804	9180	standard ATAC-Seq in frozen liver
peak_106411	chrX	139917395	139917813	190.14243320517	4.63532727479795	0.32864374008824	14.1044137142347	3.56741705971385e-45	7.6299202589748e-42	108	1946.5	standard ATAC-Seq in frozen liver
peak_42248	chr17	13743520	13746069	176.813972178757	4.72044806228937	0.344113386832111	13.7177112048606	7.95367544454021e-43	1.6677609771837e-39	576	11078.5	standard ATAC-Seq in frozen liver
peak_47573	chr18	40467582	40468103	184.155177362534	4.37471258287929	0.319555351020932	13.689999459883	1.16510125292659e-42	2.39605313243685e-39	155	2336.5	standard ATAC-Seq in frozen liver
peak_7743	chr10	11211758	11212132	165.3499490246	4.51971067975018	0.339619236871929	13.3081704127807	2.07500924936626e-40	4.18678139845243e-37	92	1507.5	standard ATAC-Seq in frozen liver
peak_43822	chr17	36368059	36368683	197.203553904088	3.6566367128007	0.275847327147622	13.2560164733582	4.16435933874874e-40	8.24689672826761e-37	311.5	2898.5	standard ATAC-Seq in frozen liver
peak_106863	chrX	166649836	166650392	175.715957810468	5.89919797531348	0.45537874959544	12.9544867443954	2.21613355349478e-38	4.30892920140324e-35	58	2446	standard ATAC-Seq in frozen liver
peak_104013	chr9	123370615	123371434	212.298524992779	3.10786500845963	0.248795715439342	12.4916339615075	8.29326995839597e-36	1.58370356443019e-32	627	3967	standard ATAC-Seq in frozen liver
peak_27611	chr13	77578020	77578444	148.513695501512	3.8940738773205	0.315000967994939	12.362101304346	4.19057220897872e-35	7.86202809571887e-32	139	1506	standard ATAC-Seq in frozen liver
peak_19717	chr11	121843553	121843962	147.613672260215	5.76064180012973	0.473145209062154	12.1752089840415	4.21313580677394e-34	7.76807810414825e-31	38.5	1511	standard ATAC-Seq in frozen liver
peak_93497	chr8	19783838	19785434	190.201177587823	3.19520920657945	0.262882360370024	12.1545211404903	5.42788970410169e-34	9.83818808588017e-31	1042.5	6986.5	standard ATAC-Seq in frozen liver
peak_41719	chr17	3083689	3084663	196.653604366567	3.12029213730005	0.258011642992157	12.0936098119994	1.14158327169131e-33	2.03466289152328e-30	689.5	4372	standard ATAC-Seq in frozen liver
peak_38498	chr16	17222252	17222756	164.728754961566	3.39919381728322	0.283078543577249	12.0079528964922	3.22735280324621e-33	5.65786690862863e-30	250	1932	standard ATAC-Seq in frozen liver
peak_104066	chr9_random	241895	243677	128.450037438366	4.13744557110914	0.345796510338689	11.9649720208476	5.42158611836091e-33	9.35127415986124e-30	436.5	5534	standard ATAC-Seq in frozen liver
peak_99188	chr9	24346313	24346756	121.692182556615	4.96001941750439	0.416097671637995	11.9203248554094	9.27461973446005e-33	1.5743151742594e-29	57.5	1333	standard ATAC-Seq in frozen liver
peak_46051	chr18	3004710	3006118	123.903468170818	3.76918263646443	0.324799731401749	11.6046359404229	3.90345308610916e-31	6.52236514961606e-28	422.5	4155.5	standard ATAC-Seq in frozen liver
peak_105526	chrX	73843834	73844584	113.14339731854	4.09934718259949	0.355036078207058	11.5462834180158	7.70822022440137e-31	1.26816825011886e-27	161	2052	standard ATAC-Seq in frozen liver
peak_55830	chr2	69193457	69193863	112.381878395293	3.98284888364956	0.345962055973392	11.5123864449339	1.14271749145882e-30	1.85153130028962e-27	94	1094	standard ATAC-Seq in frozen liver
peak_15067	chr11	53953457	53954279	103.328200866606	4.07298838838802	0.362628286209727	11.2318551620995	2.8444271213078e-29	4.54000286456023e-26	165	2055	standard ATAC-Seq in frozen liver
peak_95840	chr8	86280629	86281010	152.342983949557	6.59497614923148	0.59002980936918	11.1773609477162	5.26318836634953e-29	8.27706030454488e-26	19.5	1468	standard ATAC-Seq in frozen liver
peak_32712	chr14	86598674	86599083	106.229526952708	5.275987422222	0.472506138281622	11.1659658886324	5.98372348924466e-29	9.27381748139615e-26	38.5	1079.5	standard ATAC-Seq in frozen liver
peak_27510	chr13	74665952	74668181	108.230635202764	3.64320931446674	0.326446448734856	11.1602050767775	6.38441303830239e-29	9.75346779861456e-26	616	5699.5	standard ATAC-Seq in frozen liver
peak_42231	chr17	13498724	13499239	95.3894382514929	4.51015058574606	0.404543070567879	11.1487525405266	7.2617255064289e-29	1.09374882243944e-25	73	1199.5	standard ATAC-Seq in frozen liver
peak_24206	chr13	3372014	3373027	96.1911832371224	4.02415434739475	0.366268695504185	10.9868913090029	4.41884707405811e-28	6.56315398962083e-25	196.5	2347.5	standard ATAC-Seq in frozen liver
peak_52843	chr1_random	272401	272996	137.108101765135	3.21001565543743	0.292674368107739	10.9678742152636	5.4539575308182e-28	7.98959951216668e-25	275	1880	standard ATAC-Seq in frozen liver
peak_55309	chr2	57481785	57482266	99.9024198026322	5.31325567777262	0.487598895327316	10.8967754617367	1.19414457171843e-27	1.7256841399324e-24	40.5	1192.5	standard ATAC-Seq in frozen liver
peak_24405	chr13	9010868	9011225	89.2973228585486	4.03790155083355	0.372673519421542	10.8349569808478	2.35075876425832e-27	3.35183721988027e-24	65.5	764	standard ATAC-Seq in frozen liver
peak_45009	chr17	71312859	71313379	131.072673852288	3.16434655891539	0.293745058484489	10.7724248204927	4.64601172777289e-27	6.53736642310928e-24	237.5	1566.5	standard ATAC-Seq in frozen liver
peak_75600	chr5	60433961	60434437	86.7171318441811	3.86475053835974	0.362263204902952	10.6683496586276	1.43146198993951e-26	1.98804043820962e-23	90	984	standard ATAC-Seq in frozen liver
peak_98588	chr9	3258483	3259066	94.9371020886606	3.39402789796344	0.323026705955682	10.5069575839624	8.02404606900726e-26	1.07260432821696e-22	167	1287.5	standard ATAC-Seq in frozen liver
peak_13148	chr11	3080056	3080265	85.0462387817279	5.21719911309253	0.5067034151891	10.2963567181514	7.31805893862996e-25	9.5437305468067e-22	16.5	441.5	standard ATAC-Seq in frozen liver
peak_104073	chrM	12642	16232	2451.16291156905	14.8680863655328	1.44692420560203	10.2756497596545	9.0730974569252e-25	1.16899755294714e-21	0	224338	standard ATAC-Seq in frozen liver
peak_104072	chrM	62	3412	2387.7359603957	14.8302679556266	1.44690612648684	10.2496407224671	1.18784233042866e-24	1.51222227349655e-21	0	203855	standard ATAC-Seq in frozen liver
peak_106852	chrX	166443060	166443710	74.5055447204196	4.22234746743463	0.414431318738653	10.188292429939	2.23658065453507e-24	2.81385527782737e-21	86.5	1175.5	standard ATAC-Seq in frozen liver
peak_60919	chr2	181652005	181652898	78.7362770663052	3.65377108445746	0.360723386785843	10.1290108107869	4.10783917290902e-24	5.1080024803688e-21	180.5	1664	standard ATAC-Seq in frozen liver
peak_80332	chr5	152536969	152537389	73.9679165462814	4.86677038331937	0.487279865854113	9.987628720897	1.7266268332789e-23	2.09822439686377e-20	37	765	standard ATAC-Seq in frozen liver
peak_13146	chr11	3074152	3074644	70.0946392060181	3.73321824349382	0.380022033070475	9.82368894069229	8.90248408826498e-23	1.05780305101663e-19	84	819.5	standard ATAC-Seq in frozen liver
peak_61800	chr3	35579283	35579975	69.8163234376468	3.72705863678882	0.379874045415281	9.81130109248283	1.00662161416199e-22	1.18293526150406e-19	118	1147.5	standard ATAC-Seq in frozen liver
peak_81159	chr6	29697744	29699060	66.0697653904739	3.86898753019189	0.398149308920293	9.71742872211397	2.5411732011665e-22	2.95381001042983e-19	194.5	2071.5	standard ATAC-Seq in frozen liver
peak_11685	chr10	95540109	95540510	79.7232791102296	3.11578202098691	0.324207430558847	9.6104583896061	7.22267199722689e-22	8.30521850227362e-19	115	729	standard ATAC-Seq in frozen liver
peak_98525	chr8_random	679992	680267	65.3422114081289	3.55434222885353	0.374908594570222	9.48055680859508	2.52929782789259e-21	2.76000592262251e-18	47.5	424	standard ATAC-Seq in frozen liver
peak_80081	chr5	148422913	148423256	71.1275776381233	5.28173019006908	0.55737770147482	9.47603425126917	2.64130980981918e-21	2.85312151264902e-18	20.5	607	standard ATAC-Seq in frozen liver
peak_104162	chrUn_random	3658473	3659025	63.0816119728313	3.79669620952595	0.401028104782617	9.46740680826846	2.86876971667722e-21	3.03745905674995e-18	83	832.5	standard ATAC-Seq in frozen liver
peak_80592	chr6	9839801	9840295	83.3507786502132	3.02156925944095	0.319582500810835	9.45473939209661	3.23827618697854e-21	3.39507859960096e-18	157.5	928.5	standard ATAC-Seq in frozen liver
peak_106847	chrX	166432426	166433021	61.0049485358867	4.01012950667073	0.424602697467695	9.44442776879869	3.57351513678188e-21	3.7101760700225e-18	74.5	872.5	standard ATAC-Seq in frozen liver
peak_106851	chrX	166440496	166441048	60.2684855743041	3.64600477009095	0.394980399875206	9.23084986303853	2.68493035763541e-20	2.68339969640349e-17	86	788.5	standard ATAC-Seq in frozen liver
peak_8232	chr10	21862016	21862960	70.5375376940325	3.05507035517649	0.331577831275612	9.21373525914968	3.14969362361856e-20	3.1187508001495e-17	249	1520	standard ATAC-Seq in frozen liver
peak_37824	chr16	3116155	3116729	57.591858416947	3.73933386427281	0.408534926710667	9.15303348572957	5.53568150418151e-20	5.38163858523333e-17	78	782.5	standard ATAC-Seq in frozen liver
peak_60920	chr2	181653185	181653976	56.5786231796575	3.89450527394845	0.425703082621964	9.14840750027379	5.77789775537247e-20	5.56650998253853e-17	99	1066.5	standard ATAC-Seq in frozen liver
peak_69209	chr4	70039008	70039414	63.7485286933382	3.26176499518034	0.356957467972636	9.137685264594	6.38033122618489e-20	6.09202000890166e-17	83	597	standard ATAC-Seq in frozen liver
peak_98526	chr8_random	681513	681941	61.422682714812	3.39031767245665	0.371170093339123	9.1341348166191	6.59318415900934e-20	6.23954443168407e-17	79.5	614	standard ATAC-Seq in frozen liver
peak_44947	chr17	68090569	68091013	73.1645005846044	5.74754692772564	0.630072917346292	9.12203456059159	7.37270096087148e-20	6.79680403495375e-17	22	817.5	standard ATAC-Seq in frozen liver
peak_3306	chr1	102076591	102076984	59.8159864472706	3.41546407714671	0.376240660532003	9.07787072326862	1.10719562247758e-19	1.01198626215496e-16	70.5	549.5	standard ATAC-Seq in frozen liver
peak_41425	chr16	93789322	93789741	55.3709721637241	4.30079067528762	0.476217111409948	9.03115526981833	1.69868868239701e-19	1.53945821192249e-16	37	561.5	standard ATAC-Seq in frozen liver
peak_26456	chr13	52282427	52282644	53.6702733506587	4.01781329058424	0.448892569037195	8.95050078285285	3.53873269062314e-19	3.18007172439116e-16	23	279	standard ATAC-Seq in frozen liver
peak_93523	chr8	19924219	19925023	54.283250623822	3.64730312600024	0.41012422664804	8.89316672611559	5.93915997169623e-19	5.29273190177686e-16	110.5	1032	standard ATAC-Seq in frozen liver
peak_106848	chrX	166435871	166436335	52.4828465822775	4.49496413777833	0.510559065066989	8.80400416979877	1.3201948224647e-18	1.16677945553349e-15	34	593	standard ATAC-Seq in frozen liver
peak_93524	chr8	19926412	19927080	52.1831293346542	3.34348133754846	0.390216395615951	8.56827487289665	1.05046813471539e-17	9.13300909417306e-15	109.5	811.5	standard ATAC-Seq in frozen liver
peak_13152	chr11	3096593	3096837	55.9540080304628	3.24075791317949	0.381390204376315	8.49722377762451	1.94178870503369e-17	1.67462050264192e-14	44	317	standard ATAC-Seq in frozen liver
peak_105503	chrX	72979849	72980996	55.7241514592024	5.34653800008828	0.63097000745878	8.47352162049883	2.38083627857462e-17	2.02066865709913e-14	56.5	1587.5	standard ATAC-Seq in frozen liver
peak_37840	chr16	3349860	3350515	47.2459027419994	3.71531469631398	0.44020165019708	8.44002900636701	3.17258923160257e-17	2.67144503809722e-14	77	734.5	standard ATAC-Seq in frozen liver
peak_13491	chr11	7101085	7104239	54.3103001692516	5.30884711665464	0.632301200646784	8.39607312341682	4.61658204351237e-17	3.85697396211851e-14	165	4227.5	standard ATAC-Seq in frozen liver
peak_41261	chr16	91534734	91535102	51.4887858442233	3.17759833203366	0.379697709869903	8.36875822380495	5.82285847926679e-17	4.82705940243652e-14	63.5	433.5	standard ATAC-Seq in frozen liver
peak_26457	chr13	52283339	52284012	45.5018444368754	4.13478422799259	0.495649430833957	8.34215469800014	7.2948934158624e-17	6.00083543845315e-14	58	737	standard ATAC-Seq in frozen liver
peak_106850	chrX	166437834	166438057	49.2163937411226	3.32855678628433	0.401285092709235	8.29474318074445	1.08820046796717e-16	8.81599013969252e-14	35.5	255.5	standard ATAC-Seq in frozen liver
peak_105507	chrX	72995537	72996183	66.326500370533	6.19827265714915	0.754540023491207	8.21463734749305	2.12806399144089e-16	1.68572618652368e-13	22	1076.5	standard ATAC-Seq in frozen liver
peak_93525	chr8	19928704	19929329	44.0595952331644	3.82901516581672	0.46762751827449	8.18817331354983	2.65220714910243e-16	2.07234583803698e-13	61.5	655.5	standard ATAC-Seq in frozen liver
peak_73632	chr4	152527042	152527447	45.1218025478718	4.60396158897672	0.562278040787553	8.18805155991545	2.65489091735537e-16	2.07234583803698e-13	23.5	448.5	standard ATAC-Seq in frozen liver
peak_98524	chr8_random	676759	677348	45.9851832475645	3.38764215256372	0.414295288267494	8.1768783003307	2.91291950887264e-16	2.25728043014008e-13	83.5	631	standard ATAC-Seq in frozen liver
peak_60992	chr3	8245243	8246620	47.265777073446	3.26396740837645	0.399642420691798	8.16721959277092	3.15578158110285e-16	2.42788580216948e-13	213.5	1505.5	standard ATAC-Seq in frozen liver
peak_105505	chrX	72989746	72990670	64.387198971171	6.15491491629135	0.754709578460507	8.15534225608537	3.48192417026415e-16	2.65966777745627e-13	27.5	1495.5	standard ATAC-Seq in frozen liver
peak_105506	chrX	72994917	72995403	54.1308186605173	5.57240527887036	0.684162580517795	8.14485538605896	3.79735471391491e-16	2.88003770036416e-13	18.5	658	standard ATAC-Seq in frozen liver
peak_93526	chr8	19929840	19930205	42.7113485749774	3.90504917384989	0.481359568899355	8.11254086582078	4.95720922986957e-16	3.73323237910579e-13	36.5	374.5	standard ATAC-Seq in frozen liver
peak_106889	chrY	2652085	2652445	46.8783615254397	5.09111576105124	0.634094047637211	8.02896002575956	9.83023785778777e-16	7.20024524845182e-13	19.5	418	standard ATAC-Seq in frozen liver
peak_23350	chr12	105586537	105587026	43.2996471109698	3.47889497633108	0.433880944534668	8.01808657456058	1.07405098103705e-15	7.70858643363229e-13	63.5	496	standard ATAC-Seq in frozen liver
peak_93522	chr8	19920794	19921016	41.7965976812194	3.6324969213286	0.457712894003497	7.93619093741511	2.08484978971156e-15	1.47650166663553e-12	25.5	219.5	standard ATAC-Seq in frozen liver
peak_26455	chr13	52280630	52281160	46.2703243138133	5.07179195870714	0.639482600684353	7.93108671491528	2.17236458858999e-15	1.52835853117911e-12	25.5	604	standard ATAC-Seq in frozen liver
peak_94754	chr8	56202112	56202332	41.0378540991133	3.71764568964871	0.470948855869762	7.893947810496	2.92774636663651e-15	2.03305369286846e-12	21.5	214.5	standard ATAC-Seq in frozen liver
peak_46053	chr18	3008479	3009059	39.4768963043186	3.91653959832949	0.50131864259091	7.81247547086633	5.60755596962851e-15	3.86881566345873e-12	47	547	standard ATAC-Seq in frozen liver
peak_98231	chr8	128302857	128303194	40.0854190878631	3.45811720330279	0.447039228745766	7.73560122006528	1.02915580494859e-14	6.83583184008678e-12	40.5	316.5	standard ATAC-Seq in frozen liver
peak_98527	chr8_random	682486	683368	43.9138370966512	3.0672830309948	0.397488652527055	7.7166555862523	1.19421778235384e-14	7.88323798932945e-12	143	885.5	standard ATAC-Seq in frozen liver
peak_67413	chr4	28103934	28104308	43.1489489129196	3.11771170315981	0.406490583049756	7.66982516487519	1.72230949073514e-14	1.12995125539709e-11	56.5	371.5	standard ATAC-Seq in frozen liver
peak_88925	chr7	67006608	67006915	36.6439037467744	3.66728858576327	0.487019361217798	7.5300673398141	5.07141616470526e-14	3.24749804333782e-11	29.5	266.5	standard ATAC-Seq in frozen liver
peak_60922	chr2	181663864	181664150	35.6983213417905	4.07083499313398	0.544185807832937	7.48059749912425	7.39854542806428e-14	4.68161567770276e-11	19	245.5	standard ATAC-Seq in frozen liver
peak_98552	chr8_random	818090	818540	35.7181875008075	4.07073298494022	0.545414340112202	7.46356060990768	8.42151112857613e-14	5.29757634458119e-11	29.5	387.5	standard ATAC-Seq in frozen liver
peak_98555	chr8_random	821597	821797	35.3766733897493	3.89488066248435	0.523250045347874	7.44363177244429	9.7954298116517e-14	6.12580975805977e-11	15	169	standard ATAC-Seq in frozen liver
peak_29160	chr13	116982962	116983339	35.460931468012	4.24009886589396	0.569774443041567	7.44171473058616	9.9386665841856e-14	6.15892390999302e-11	24	323.5	standard ATAC-Seq in frozen liver
peak_96455	chr8	96704453	96705145	36.2801171876223	3.52758955623341	0.474050181765616	7.44138424985892	9.96356648583578e-14	6.15892390999302e-11	68.5	584.5	standard ATAC-Seq in frozen liver
peak_94755	chr8	56205639	56206958	34.8787857060746	4.03453750175489	0.545274839181923	7.39908980177393	1.37121102831252e-13	8.42735265268465e-11	90.5	1107.5	standard ATAC-Seq in frozen liver
peak_88926	chr7	67007390	67007717	35.03961376831	3.73323270675574	0.50504135245125	7.3919347171004	1.44707575530874e-13	8.84279052554065e-11	27.5	272.5	standard ATAC-Seq in frozen liver
peak_106854	chrX	166445717	166445961	34.261362115722	3.84630949581406	0.524541485631825	7.33270790046486	2.2554818574725e-13	1.35505041773175e-10	20	200	standard ATAC-Seq in frozen liver
peak_94756	chr8	56207223	56207607	34.0916250742491	4.18000858262698	0.571485518822856	7.31428609291265	2.58753333317683e-13	1.54585601741116e-10	21.5	316	standard ATAC-Seq in frozen liver
peak_20132	chr12	16754488	16754860	33.9696828784943	3.83340993687211	0.524350689175965	7.31077505189598	2.6560586113611e-13	1.57797917689081e-10	30	301	standard ATAC-Seq in frozen liver
peak_88927	chr7	67011053	67011293	34.0592500703587	3.99730689315169	0.546898487199079	7.30904726693203	2.69043125550326e-13	1.58956921564787e-10	15.5	197	standard ATAC-Seq in frozen liver
peak_52832	chr19	61340182	61340522	34.2245326222128	3.69582574348436	0.506747042189833	7.29323594571641	3.02597471510324e-13	1.77799291240893e-10	29.5	277.5	standard ATAC-Seq in frozen liver
peak_66473	chr3	148715441	148715971	37.3029612363606	5.02179360063656	0.692901112845933	7.24748958767102	4.24567078142209e-13	2.47871499309445e-10	22	492.5	standard ATAC-Seq in frozen liver
peak_98554	chr8_random	819433	819840	36.9352330678966	3.12901220953892	0.431773853191608	7.24687747164338	4.2648945541793e-13	2.47871499309445e-10	54	346	standard ATAC-Seq in frozen liver
peak_60923	chr2	181664805	181666471	35.9487247683198	3.28622334018995	0.453740037002852	7.2425245122667	4.40408807531639e-13	2.54577716046627e-10	188	1382.5	standard ATAC-Seq in frozen liver
peak_46054	chr18	3010239	3010612	33.1590562220159	3.79512897666135	0.525523786800374	7.22161217433717	5.13748169172646e-13	2.90686325201871e-10	30	295	standard ATAC-Seq in frozen liver
peak_98551	chr8_random	817592	817796	33.0682872811631	4.33560755918288	0.606557750625117	7.14788914116522	8.8122430707743e-13	4.95985506181859e-10	10.5	165	standard ATAC-Seq in frozen liver
peak_22844	chr12	94815358	94815743	47.9231281061664	6.14353841133799	0.867070112325618	7.0853998125481	1.38643442088329e-12	7.76250840496537e-10	10.5	468	standard ATAC-Seq in frozen liver
peak_88924	chr7	67004306	67004868	31.7654291796173	3.72952125382862	0.527604982697844	7.06877564870249	1.56306613078589e-12	8.70587130000586e-10	42	422	standard ATAC-Seq in frozen liver
peak_56699	chr2	91933647	91934087	45.9437363002352	6.08228896211756	0.865622603354496	7.02649045732774	2.11793058145838e-12	1.16148399205425e-09	10.5	507	standard ATAC-Seq in frozen liver
peak_98523	chr8_random	675583	676457	31.5203430391192	3.71621288696338	0.529972796394439	7.01208234129349	2.34796941448552e-12	1.2810688837534e-09	65	655.5	standard ATAC-Seq in frozen liver
peak_61833	chr3	36373999	36375139	33.7108833530343	3.1835924073312	0.45410139898851	7.01075225582327	2.37040145348814e-12	1.28674294941405e-09	137	885.5	standard ATAC-Seq in frozen liver
peak_67562	chr4	34882904	34883234	33.9988079328545	4.88349351733152	0.696931123346996	7.00713937681339	2.43239933239012e-12	1.31372905154781e-09	13	278.5	standard ATAC-Seq in frozen liver
peak_32765	chr14	91310836	91311203	31.9805384328723	4.5188692912186	0.645053813411697	7.00541442785718	2.46255808455418e-12	1.32333416584995e-09	16.5	289	standard ATAC-Seq in frozen liver
peak_9421	chr10	57690676	57690909	30.9414390542825	3.68797451890382	0.528661895126579	6.97605511745989	3.03583665797219e-12	1.61517082769596e-09	18	170.5	standard ATAC-Seq in frozen liver
peak_102488	chr9	95326194	95326586	33.12822471079	4.84553649503697	0.695615512907951	6.96582581199303	3.26482897785053e-12	1.72840369337801e-09	15	319	standard ATAC-Seq in frozen liver
peak_94757	chr8	56208270	56208970	31.6654013434213	3.43880271225783	0.493746484035603	6.964713316338	3.29073169810393e-12	1.73353476385978e-09	62.5	518	standard ATAC-Seq in frozen liver
peak_98550	chr8_random	816873	817190	32.6700856900083	3.24443065154575	0.467546047156538	6.93927511798531	3.9411694884467e-12	2.06600354865197e-09	35.5	238.5	standard ATAC-Seq in frozen liver
peak_106853	chrX	166445088	166445288	30.9705722810722	3.68951473522335	0.532962745298386	6.92265034989965	4.43270924002544e-12	2.30111404572369e-09	16	147.5	standard ATAC-Seq in frozen liver
peak_103549	chr9	115259811	115260182	30.8806388282432	4.46604184811837	0.646525776858397	6.90775527902352	4.92382403619516e-12	2.54371409954915e-09	17.5	278.5	standard ATAC-Seq in frozen liver
peak_56976	chr2	102492264	102492469	87.3152452794859	10.0567246317099	1.46051293899129	6.88574839922719	5.74845120947777e-12	2.94130920521695e-09	1	457	standard ATAC-Seq in frozen liver
peak_7225	chr1	194277784	194278160	29.9780386908234	4.18841453864593	0.608954836945264	6.87803804902268	6.06824648676249e-12	3.09015338594235e-09	22.5	271.5	standard ATAC-Seq in frozen liver
peak_98553	chr8_random	818653	818976	32.0615547340342	4.79526461164279	0.697777003013817	6.87220213754714	6.32182861110721e-12	3.20402857745589e-09	12	255.5	standard ATAC-Seq in frozen liver
peak_80404	chr6	4873716	4874330	30.3195528018816	4.43856878527487	0.647321588738627	6.8568218061812	7.04093658142754e-12	3.55165432585509e-09	28.5	454.5	standard ATAC-Seq in frozen liver
peak_46615	chr18	14261677	14262012	29.1175771605147	3.93889005556462	0.57866698921884	6.80683385945661	9.97700353359104e-12	4.93949435591987e-09	21	234	standard ATAC-Seq in frozen liver
peak_23436	chr12	106762820	106763168	29.4890599863863	4.39667845722305	0.648619738998277	6.77851473347581	1.21417596722867e-11	5.98353750043627e-09	17	248.5	standard ATAC-Seq in frozen liver
peak_9420	chr10	57687932	57688358	28.7894265183129	3.73989845621982	0.554108852494559	6.74939308293499	1.48464864992897e-11	7.21667463521611e-09	31	291	standard ATAC-Seq in frozen liver
peak_13153	chr11	3098952	3099945	28.8704428194748	3.92513406399868	0.582267886059496	6.74111376906266	1.57177069640279e-11	7.60559214943971e-09	63.5	690	standard ATAC-Seq in frozen liver
peak_90294	chr7	104565037	104565240	35.6820239474481	-3.16092960339693	0.47129918516907	-6.70684292030551	1.98880143036205e-11	9.53723928975279e-09	226	18	FFPE-ATAC in frozen liver
peak_93521	chr8	19919155	19919521	28.0630579400972	4.08668595019528	0.611730732625973	6.68053071757959	2.38078470350153e-11	1.13154993514555e-08	18.5	246	standard ATAC-Seq in frozen liver
peak_53650	chr2	22595012	22595326	29.2897123186351	4.66075841468051	0.70114683342871	6.64733575403702	2.98445719847717e-11	1.40596858303062e-08	13.5	225.5	standard ATAC-Seq in frozen liver
peak_28827	chr13	111534130	111534817	28.1108446133858	4.32422108907048	0.650813806477492	6.64432906313894	3.04601378348717e-11	1.42243523140757e-08	34	467.5	standard ATAC-Seq in frozen liver
peak_82471	chr6	56183522	56183876	27.7417680765912	3.86498837084437	0.582262079595213	6.6378843931092	3.1821727962505e-11	1.47955815938362e-08	22.5	236.5	standard ATAC-Seq in frozen liver
peak_56979	chr2	102499504	102500398	54.8551308657617	6.93189719554065	1.04537318159777	6.63102642918944	3.33360533800066e-11	1.54272091204223e-08	13	1241.5	standard ATAC-Seq in frozen liver
peak_88928	chr7	67013631	67013871	29.1917408554104	3.30985840975835	0.499191354096083	6.63044017609584	3.34687299856737e-11	1.54272091204223e-08	21.5	162.5	standard ATAC-Seq in frozen liver
peak_88931	chr7	67027845	67028099	30.4617192451885	5.05177686793037	0.771249817943537	6.55011742031972	5.74918607379228e-11	2.59414434407288e-08	8.5	192	standard ATAC-Seq in frozen liver
peak_60921	chr2	181663009	181663209	27.4355317939482	3.66369381440278	0.559391084412028	6.5494319028228	5.77563697357675e-11	2.59512958956859e-08	15	130.5	standard ATAC-Seq in frozen liver
peak_64040	chr3	95848444	95848960	29.6086122379232	3.08724531285321	0.472697573994155	6.53112155149624	6.52789913731309e-11	2.90869585768802e-08	59	346	standard ATAC-Seq in frozen liver
peak_49280	chr18	82390247	82390908	26.7346774409271	4.24724738752637	0.653637459549304	6.49786410719932	8.14683410155771e-11	3.61499706218456e-08	31.5	429.5	standard ATAC-Seq in frozen liver
peak_88639	chr7	52966082	52966570	31.1344480552457	-3.91696991966522	0.60374401835417	-6.4877991343799	8.70992919376149e-11	3.83304986852535e-08	495.5	22.5	FFPE-ATAC in frozen liver
peak_9544	chr10	59432427	59433282	27.791253034316	3.23207527360448	0.501662754961335	6.44272520062525	1.17347054064522e-10	5.0753544716152e-08	79.5	545	standard ATAC-Seq in frozen liver
peak_47826	chr18	48169935	48170302	25.90213642489	4.20002374191394	0.65508838193168	6.41138487226592	1.4420363644014e-10	6.16839707090885e-08	18	228.5	standard ATAC-Seq in frozen liver
peak_73834	chr4_random	142955	143404	25.7413165350841	3.5659161427603	0.560764354208093	6.35902784476388	2.03034604033288e-10	8.5819436840774e-08	33.5	271.5	standard ATAC-Seq in frozen liver
peak_105508	chrX	72999468	72999998	27.6696525822372	4.90932432662254	0.773118303607793	6.35002987733307	2.15273113764532e-10	9.06342185545877e-08	16	362.5	standard ATAC-Seq in frozen liver
peak_98522	chr8_random	674708	675357	25.9721955462725	4.48011863145252	0.706496931528393	6.34131364415201	2.27814209438948e-10	9.51649364968425e-08	26.5	412.5	standard ATAC-Seq in frozen liver
peak_32173	chr14	69779924	69780608	25.0716436093946	4.15047195643484	0.657037652626804	6.31694689009291	2.66781212851853e-10	1.10151799695615e-07	33.5	411.5	standard ATAC-Seq in frozen liver
peak_56975	chr2	102489414	102491317	47.2356372220017	9.17035410803438	1.46190252966175	6.27289023855522	3.54406757644601e-10	1.44656123113572e-07	3.5	2299.5	standard ATAC-Seq in frozen liver
peak_93378	chr8	14306692	14307459	25.1348419520814	4.43013011476204	0.707488525949082	6.26176955848027	3.80633147272652e-10	1.53536261434631e-07	30.5	466.5	standard ATAC-Seq in frozen liver
peak_56980	chr2	102501191	102501960	46.6790056852589	9.15329579404218	1.46189613412004	6.2612490589503	3.81905998200955e-10	1.53536261434631e-07	3	920	standard ATAC-Seq in frozen liver
peak_46520	chr18	12809701	12810275	31.2017346265866	-3.07268660821234	0.49264299976929	-6.23714659429101	4.45624356909474e-10	1.75847317725248e-07	557.5	50.5	FFPE-ATAC in frozen liver
peak_78834	chr5	125964881	125965086	28.1757504721096	-4.00069756170487	0.647442930739522	-6.17922811688622	6.44157635376042e-10	2.52328107580507e-07	189.5	9.5	FFPE-ATAC in frozen liver
peak_5599	chr1	164914537	164914950	26.648021246017	3.03517444889616	0.491456508403066	6.17587598698942	6.57976202618524e-10	2.56800427488403e-07	41	249	standard ATAC-Seq in frozen liver
peak_105504	chrX	72985102	72985302	29.0936064279845	5.41175365132314	0.876949731995377	6.17111044553198	6.78120304180787e-10	2.63700026213779e-07	6	145	standard ATAC-Seq in frozen liver
peak_82777	chr6	71153492	71154689	28.2973345793293	-3.5621473829394	0.577684581727675	-6.16624970721242	6.99286266958169e-10	2.69967415531551e-07	1083	73	FFPE-ATAC in frozen liver
peak_98512	chr8_random	386675	386888	24.4619354217208	3.6684928443254	0.59611221370418	6.15403066736338	7.55380675484756e-10	2.9057429516426e-07	14	124	standard ATAC-Seq in frozen liver
peak_9422	chr10	57693958	57694329	25.8632669032685	3.11746463906861	0.507076190873473	6.14792154547537	7.85048445683996e-10	3.00904285781365e-07	35	221	standard ATAC-Seq in frozen liver
peak_81580	chr6	37567050	37568150	24.0239851676729	4.36280203981944	0.710098217383115	6.14394168724635	8.04984048794058e-10	3.0744353283567e-07	40.5	642	standard ATAC-Seq in frozen liver
peak_104930	chrX	34670458	34670701	23.8895341270447	3.63129348873906	0.591907644989733	6.1348987793561	8.52134326212914e-10	3.24293212494245e-07	15	138	standard ATAC-Seq in frozen liver
peak_93482	chr8	19713388	19713606	26.1683096093526	3.13557890718794	0.511256571257376	6.13308284620451	8.61922328113719e-10	3.26855006546642e-07	21	132.5	standard ATAC-Seq in frozen liver
peak_46521	chr18	12812387	12812942	28.3605329220161	-3.37953070171171	0.55209607220546	-6.12127285784063	9.28307802208288e-10	3.4832388793106e-07	499	34	FFPE-ATAC in frozen liver
peak_94753	chr8	56200205	56200630	24.0596210846232	4.36411941133616	0.714101985438707	6.11133913688124	9.87985583587438e-10	3.69420245885514e-07	17.5	248	standard ATAC-Seq in frozen liver
peak_88930	chr7	67024130	67024480	25.5935020255995	3.09893867023153	0.507714659783372	6.10370138131085	1.03639840325908e-09	3.82177271883184e-07	30.5	203	standard ATAC-Seq in frozen liver
peak_58769	chr2	144993462	144994265	24.6393605574836	4.73589369081504	0.778538371274303	6.08305751592356	1.17912024661032e-09	4.2889095255871e-07	25.5	484.5	standard ATAC-Seq in frozen liver
peak_93516	chr8	19899393	19900185	24.8330683314868	3.19015095685296	0.526141899511501	6.06329007405582	1.33364818275327e-09	4.80198663351691e-07	64.5	453.5	standard ATAC-Seq in frozen liver
peak_81334	chr6	31546023	31546318	22.8828015799158	4.00946257507093	0.662972300031409	6.04770753601769	1.46921347295382e-09	5.23720731947362e-07	12.5	161.5	standard ATAC-Seq in frozen liver
peak_26529	chr13	53365135	53365507	23.18458337294	4.3092932855339	0.712697900709781	6.04645149262014	1.48070785175198e-09	5.26064508167791e-07	15	208.5	standard ATAC-Seq in frozen liver
peak_97599	chr8	121966688	121966990	28.9082554795212	-3.09028830872985	0.511768982274292	-6.03844393811572	1.55607470530142e-09	5.51010175199431e-07	271.5	23	FFPE-ATAC in frozen liver
peak_10651	chr10	79719087	79719291	28.9216189483776	-3.08948019106296	0.513360698484259	-6.01814708485654	1.76424854401449e-09	6.22663283988004e-07	183	15	FFPE-ATAC in frozen liver
peak_104220	chrUn_random	4523788	4525284	22.9374490319001	4.29221557935945	0.713905779365823	6.01229980680688	1.8290964303004e-09	6.41317190688179e-07	60.5	836	standard ATAC-Seq in frozen liver
peak_98562	chr8_random	843471	843751	23.3531268378541	3.59622761476899	0.598413018405298	6.00960791988204	1.85972534000632e-09	6.47808365260378e-07	18	155	standard ATAC-Seq in frozen liver
peak_98561	chr8_random	839977	840456	23.7566347515105	3.27348395657862	0.546057786713454	5.99475739789494	2.03789442205574e-09	7.05276348220772e-07	36.5	264	standard ATAC-Seq in frozen liver
peak_10650	chr10	79718501	79718982	26.7322722110214	-3.47255063049817	0.579985066931785	-5.98731041278101	2.13339389707845e-09	7.35945193418297e-07	411.5	27	FFPE-ATAC in frozen liver
peak_88932	chr7	67030693	67030941	22.5656081174934	3.74961528565846	0.626881592967269	5.98137722932667	2.21258793119827e-09	7.57853166033545e-07	13.5	134	standard ATAC-Seq in frozen liver
peak_90293	chr7	104560722	104561161	27.2411170744756	-3.3153660011478	0.554295881410287	-5.98122070240278	2.21471549722128e-09	7.57853166033545e-07	378	28.5	FFPE-ATAC in frozen liver
peak_105110	chrX	47955606	47956405	23.5350064632357	4.66718703121364	0.780929815108562	5.97644876776133	2.28054228502051e-09	7.76684431266906e-07	28	458	standard ATAC-Seq in frozen liver
peak_70608	chr4	107744608	107745149	26.5082458060992	-3.45979003753116	0.580931364959178	-5.95559173806062	2.59132488678879e-09	8.68694959461774e-07	459.5	33	FFPE-ATAC in frozen liver
peak_46533	chr18	12857426	12857682	25.9365606884935	-3.87413978522402	0.651721761759892	-5.94446896289361	2.77354512496452e-09	9.23987981677822e-07	218	11	FFPE-ATAC in frozen liver
peak_9546	chr10	59436901	59437342	23.9782548673557	3.1355319905332	0.527658728798421	5.94234837671198	2.80967500261195e-09	9.33117500323973e-07	37	241.5	standard ATAC-Seq in frozen liver
peak_42585	chr17	24479650	24480037	23.0027037475583	3.38842838456621	0.570608463327199	5.93827221700918	2.88041494047813e-09	9.53649205324431e-07	28	205.5	standard ATAC-Seq in frozen liver
peak_97296	chr8	116669678	116669879	26.2845774897122	-3.44555896760785	0.580966850264461	-5.93073247817738	3.01586242823758e-09	9.95411457448452e-07	169	12.5	FFPE-ATAC in frozen liver
peak_8637	chr10	33507278	33507715	24.4716880614116	3.02855754671786	0.511351066118789	5.92265812547326	3.16778960240073e-09	1.03596407428481e-06	42.5	243	standard ATAC-Seq in frozen liver
peak_28697	chr13	108860284	108860955	24.4737362619534	3.0278693886925	0.511336408976873	5.92148209189901	3.19053053866895e-09	1.04021995510585e-06	63.5	369.5	standard ATAC-Seq in frozen liver
peak_46529	chr18	12832983	12833346	25.8519363492661	-3.41906950607291	0.58257448971092	-5.86889671013486	4.38704622790978e-09	1.40884785755689e-06	297.5	21	FFPE-ATAC in frozen liver
peak_61373	chr3	21597226	21597592	21.9392755479032	3.49937052306468	0.597236275982293	5.85927322868852	4.6489725230649e-09	1.47963235905964e-06	23	187.5	standard ATAC-Seq in frozen liver
peak_46544	chr18	12890178	12891281	25.1235195705086	-3.5847024916901	0.61501332009193	-5.82865829825324	5.58747797322927e-09	1.76259382589724e-06	894.5	57	FFPE-ATAC in frozen liver
peak_65587	chr3	127912820	127913191	21.4235699057533	3.67099559004271	0.63054218577994	5.82196667063906	5.81591493522337e-09	1.82925919781721e-06	20	187	standard ATAC-Seq in frozen liver
peak_105509	chrX	73003311	73004852	21.2740571118325	4.17712650359329	0.717776054254448	5.81954006243919	5.90097793488677e-09	1.85057090726937e-06	53	796.5	standard ATAC-Seq in frozen liver
peak_97293	chr8	116663487	116663693	26.0650137468384	-4.49778005193199	0.772967690521274	-5.8188461265422	5.92552507408905e-09	1.85283545584213e-06	179	6.5	FFPE-ATAC in frozen liver
peak_106840	chrX	166413684	166414007	21.2565972418925	4.17827664761492	0.718699175252658	5.81366556618915	6.11194622877157e-09	1.90555515381517e-06	13.5	167.5	standard ATAC-Seq in frozen liver
peak_13482	chr11	7056345	7056782	21.6431418210567	3.47867333466444	0.599614990600419	5.80151161861563	6.57197420466895e-09	2.04302427172411e-06	28	220	standard ATAC-Seq in frozen liver
peak_23219	chr12	104896153	104896469	25.1497499727736	-3.37686249098237	0.583215658661466	-5.79007514772937	7.03549398887375e-09	2.18077881645267e-06	253	18.5	FFPE-ATAC in frozen liver
peak_56978	chr2	102498835	102499390	76.448779556664	8.41814412446731	1.4542505846008	5.78864757807756	7.09553922445591e-09	2.19303430382685e-06	6	1080	standard ATAC-Seq in frozen liver
peak_93519	chr8	19917272	19917731	20.6854086597345	3.8547175009365	0.672578835881422	5.73125007105651	9.96931608207017e-09	2.92084573287809e-06	19	228.5	standard ATAC-Seq in frozen liver
peak_52807	chr19	61000458	61000813	21.0257100582746	4.49849191887241	0.78880267532653	5.7029369442874	1.17760553644722e-08	3.39439241137813e-06	10.5	182	standard ATAC-Seq in frozen liver
peak_56977	chr2	102498246	102498624	69.8295157698723	8.28732589018736	1.4547264589465	5.69682763327819	1.2205721467647e-08	3.49937707246302e-06	2.5	671	standard ATAC-Seq in frozen liver
peak_46530	chr18	12841295	12841551	25.0039754914012	-3.17978403596364	0.559140787561826	-5.68691125151023	1.29357636839887e-08	3.69876372353495e-06	201.5	16.5	FFPE-ATAC in frozen liver
peak_69732	chr4	89152510	89153244	21.3328091373301	3.26929955655611	0.57537510273189	5.68203167122357	1.33104004233982e-08	3.78564072041961e-06	48	357.5	standard ATAC-Seq in frozen liver
peak_67423	chr4	31281199	31281560	20.163200327424	4.09650444523424	0.721780005729487	5.67555822094849	1.38237116112228e-08	3.91083041267871e-06	14	174.5	standard ATAC-Seq in frozen liver
peak_36890	chr15	87798302	87798669	20.1563395487282	4.09524989701401	0.722091721487204	5.67137079009785	1.41659422549165e-08	3.99707572242353e-06	15	179	standard ATAC-Seq in frozen liver
peak_46543	chr18	12886214	12886494	24.521149561019	-4.40678731149516	0.778033655738265	-5.66400602209633	1.47879213202391e-08	4.16159346859222e-06	227	9	FFPE-ATAC in frozen liver
peak_84600	chr6	114564456	114564865	20.8008481653287	4.4807039552841	0.792398939561323	5.65460619844424	1.5620399336426e-08	4.38433040587417e-06	11.5	209.5	standard ATAC-Seq in frozen liver
peak_46531	chr18	12841801	12842079	23.4498784753023	-3.99778587033266	0.708491402186244	-5.64267379674107	1.67429384416117e-08	4.66883702134661e-06	215	10	FFPE-ATAC in frozen liver
peak_27637	chr13	81032264	81033002	23.2780932332875	-3.70548055500123	0.657930695375839	-5.63202261430361	1.78108321518056e-08	4.92163457230475e-06	556	30	FFPE-ATAC in frozen liver
peak_78833	chr5	125959115	125959394	23.2364511616244	-3.98508705053661	0.710343655839744	-5.61008325727294	2.02229299807434e-08	5.53099721025758e-06	209.5	10.5	FFPE-ATAC in frozen liver
peak_98559	chr8_random	836536	836810	21.0853167077551	3.24791692015936	0.579536161550147	5.60433866882751	2.09051602370195e-08	5.67405312331632e-06	19.5	134	standard ATAC-Seq in frozen liver
peak_96716	chr8	107577058	107577983	23.0670722086866	-3.69152312112006	0.658965216985935	-5.60199996291891	2.11892601453138e-08	5.7313433379936e-06	685.5	42	FFPE-ATAC in frozen liver
peak_17796	chr11	98514324	98514625	20.0809904497032	3.56871550583533	0.637124579810487	5.60128367186343	2.12770205928937e-08	5.7313433379936e-06	15.5	143	standard ATAC-Seq in frozen liver
peak_62256	chr3	52409439	52409780	19.5587821173926	3.76889579118877	0.67452286377414	5.58749894718285	2.30363154472184e-08	6.18964959198514e-06	15	156.5	standard ATAC-Seq in frozen liver
peak_60535	chr2	172966024	172967127	19.7804022332378	3.54596687619037	0.63605811079124	5.57491024173763	2.47657524709238e-08	6.63765614909304e-06	61.5	513	standard ATAC-Seq in frozen liver
peak_46523	chr18	12817720	12818228	24.1126824498665	-3.12151199519083	0.56164061556562	-5.55784590480017	2.73124343167421e-08	7.17632534004443e-06	382.5	33.5	FFPE-ATAC in frozen liver
peak_29207	chr13	120283067	120283317	19.7581297851439	3.54495372988698	0.639770888816899	5.54097379523239	3.007942320653e-08	7.82643172331659e-06	12.5	114.5	standard ATAC-Seq in frozen liver
peak_43712	chr17	35468380	35468826	21.0022522060513	3.07498441988339	0.556325234791398	5.52731428952059	3.25170136931828e-08	8.37899953918862e-06	36.5	213.5	standard ATAC-Seq in frozen liver
peak_94101	chr8	36197824	36198168	19.0633007227949	4.01057161755403	0.726491981867052	5.5204623280866	3.3810887755703e-08	8.65000604236154e-06	15	157.5	standard ATAC-Seq in frozen liver
peak_97297	chr8	116671743	116672271	22.3933028819134	-3.64499104032655	0.660646768060774	-5.51730700359868	3.44233786443338e-08	8.78568422159048e-06	379.5	21.5	FFPE-ATAC in frozen liver
peak_36536	chr15	82282526	82282926	23.1671000448826	-3.24584714565041	0.589124341464785	-5.50961302597005	3.59623418486875e-08	9.13486193576436e-06	292	21	FFPE-ATAC in frozen liver
peak_46540	chr18	12872496	12872891	22.1757791671519	-3.63015468350568	0.661574177088575	-5.48714688272915	4.0847747127144e-08	1.02540310564076e-05	282.5	17	FFPE-ATAC in frozen liver
peak_28696	chr13	108855221	108855919	19.2217224959533	3.50225470673625	0.63874878856365	5.48299232725239	4.18191162604367e-08	1.04002197064531e-05	37	311.5	standard ATAC-Seq in frozen liver
peak_37052	chr15	91739809	91740348	19.1042266173877	4.35347412037948	0.79440010800761	5.4802033339323	4.24837307942457e-08	1.05409923141667e-05	16	250.5	standard ATAC-Seq in frozen liver
peak_77266	chr5	104058207	104058967	18.7371982811349	3.70208494111623	0.67866928276691	5.4549174909213	4.89955903600094e-08	1.19080441761569e-05	40	337	standard ATAC-Seq in frozen liver
peak_104254	chrUn_random	5187514	5187875	18.7303375024391	3.70073960160928	0.678907343672289	5.45102308304923	5.00808687487906e-08	1.21277254222815e-05	15	159.5	standard ATAC-Seq in frozen liver
peak_97393	chr8	118173807	118174640	18.5066691860521	3.96529726213321	0.72875004960963	5.44123086407652	5.29136876410289e-08	1.2715813129537e-05	31	372.5	standard ATAC-Seq in frozen liver
peak_84297	chr6	103264487	103264822	21.2521345798442	8.01854475162026	1.47640491499285	5.43112845953854	5.59988041671811e-08	1.33969935544389e-05	1	181	standard ATAC-Seq in frozen liver
peak_23315	chr12	105324688	105326174	21.7236299562239	-3.59817989430239	0.662575116179973	-5.43059919763879	5.61651488385842e-08	1.34067965438602e-05	1039.5	63.5	FFPE-ATAC in frozen liver
peak_47616	chr18	43135412	43135809	19.9869605957904	4.85397359970423	0.893901117199689	5.43010127888664	5.63220795783349e-08	1.34143137372551e-05	12	196	standard ATAC-Seq in frozen liver
peak_27670	chr13	81467873	81468259	23.1953786476894	-3.05971516119579	0.563783932782812	-5.42710599447767	5.72751183561724e-08	1.34926546226994e-05	279	24.5	FFPE-ATAC in frozen liver
peak_79054	chr5	134854662	134854966	19.4700695495112	3.31025420798963	0.609950687619435	5.42708496798185	5.72818634801665e-08	1.34926546226994e-05	19.5	137.5	standard ATAC-Seq in frozen liver
peak_46421	chr18	11288492	11288957	53.2419319080596	7.89471329686616	1.45557521831062	5.42377556140931	5.83531435849451e-08	1.37147842238032e-05	3.5	631.5	standard ATAC-Seq in frozen liver
peak_19122	chr11	116042383	116042971	23.2213894083318	-3.06078723317227	0.564390020730426	-5.42317744954285	5.85488173346937e-08	1.37305964406904e-05	426	35	FFPE-ATAC in frozen liver
peak_89092	chr7	72952655	72952902	21.4910526605993	-3.58164061780285	0.66293806391232	-5.40267758448783	6.56534057523773e-08	1.53219567313342e-05	171	10.5	FFPE-ATAC in frozen liver
peak_105114	chrX	47967545	47968398	19.7240564968172	4.83276681423312	0.894563423146386	5.40237471059924	6.57643903504091e-08	1.53219567313342e-05	18.5	419	standard ATAC-Seq in frozen liver
peak_88935	chr7	67038244	67038502	19.728510986436	4.83295447757656	0.894742302539895	5.40150439278137	6.60843206273535e-08	1.53630242686273e-05	6	125	standard ATAC-Seq in frozen liver
peak_74793	chr5	33071469	33071777	19.1783903122835	3.28683446114629	0.609299050156011	5.39445196952908	6.87330090333102e-08	1.58752467667671e-05	19.5	136	standard ATAC-Seq in frozen liver
peak_88934	chr7	67036411	67036886	19.1629786428853	3.28712461084987	0.609986497237683	5.3888481560421	7.09106846541043e-08	1.62727847773074e-05	30.5	212.5	standard ATAC-Seq in frozen liver
peak_104303	chrUn_random	5810835	5811320	19.6783261965	3.13919632085919	0.582785810659389	5.38653526465815	7.18288414445354e-08	1.64481894544693e-05	35.5	218.5	standard ATAC-Seq in frozen liver
peak_36794	chr15	85592257	85592473	21.6020458490043	-4.2136535353637	0.782494323409243	-5.38489981244243	7.24850116754171e-08	1.6527664527841e-05	154.5	6.5	FFPE-ATAC in frozen liver
peak_98560	chr8_random	837083	837596	19.6851869751958	3.14045356718324	0.584088852118044	5.37667095647385	7.58756540392257e-08	1.72628974952923e-05	36	234.5	standard ATAC-Seq in frozen liver
peak_9424	chr10	57696127	57696755	19.4412862388271	4.81141390322798	0.895474519038583	5.37303273396736	7.74232668904595e-08	1.75043694249447e-05	14.5	302.5	standard ATAC-Seq in frozen liver
peak_8645	chr10	33577284	33577541	19.4258745694289	4.81177640497881	0.896234341622571	5.36888197819716	7.92262420490245e-08	1.78365791546961e-05	6	122.5	standard ATAC-Seq in frozen liver
peak_97298	chr8	116676468	116676728	21.2824379250754	-3.56541263627628	0.664360843826857	-5.36668087742613	8.0198770135913e-08	1.80175972259756e-05	177	11	FFPE-ATAC in frozen liver
peak_82417	chr6	55121735	55122047	21.030352558969	-3.54762298121589	0.664975066486343	-5.33497142977277	9.55596024036508e-08	2.11137362013306e-05	212	15	FFPE-ATAC in frozen liver
peak_46537	chr18	12866154	12866773	21.062866009772	-3.54907250462604	0.665333074815057	-5.33427938422057	9.59247338504967e-08	2.11507115736871e-05	415.5	27	FFPE-ATAC in frozen liver
peak_1868	chr1	64352054	64352543	17.9767645870221	3.9198796879333	0.735167574674277	5.33195399657016	9.7161556025585e-08	2.1379340822675e-05	21.5	212	standard ATAC-Seq in frozen liver
peak_20949	chr12	42241579	42241932	19.3845987587305	3.11664260581924	0.584953614412712	5.32801666495954	9.92910158292803e-08	2.18030430015758e-05	26	155.5	standard ATAC-Seq in frozen liver
peak_74532	chr5	28405302	28406198	21.330224598364	-3.32657131861219	0.625533606451073	-5.31797378159312	1.04929184230693e-07	2.28534053613974e-05	607	49	FFPE-ATAC in frozen liver
peak_90931	chr7	116586174	116586686	22.811044174097	5.64941201095471	1.06416968175806	5.30875113978216	1.10378918892382e-07	2.37928008887769e-05	8.5	291.5	standard ATAC-Seq in frozen liver
peak_105502	chrX	72979072	72979635	22.8065896844782	5.64925036520061	1.0641465650624	5.30871456120272	1.10401069385876e-07	2.37928008887769e-05	11	320	standard ATAC-Seq in frozen liver
peak_105113	chrX	47964877	47965743	22.8154986637158	5.64957412160361	1.06428538063853	5.30832634214526	1.1063642425217e-07	2.37928008887769e-05	17.5	491.5	standard ATAC-Seq in frozen liver
peak_23217	chr12	104894355	104894979	21.8257059929617	-3.15106486670399	0.593976733740647	-5.30503079953948	1.12653973636857e-07	2.40461143448142e-05	425.5	35.5	FFPE-ATAC in frozen liver
peak_82418	chr6	55122587	55122897	20.5475184561572	-3.79554799518383	0.716433574985748	-5.29783657230097	1.17182773741121e-07	2.48146705764392e-05	206	11	FFPE-ATAC in frozen liver
peak_5598	chr1	164907143	164907365	17.7369684241666	4.23929439339141	0.800378316674929	5.29661324535006	1.17970187978995e-07	2.48877419021316e-05	6	95.5	standard ATAC-Seq in frozen liver
peak_82416	chr6	55120832	55121289	20.5584756359366	-3.79546852343381	0.716637588978022	-5.29621747701852	1.18226024988852e-07	2.48877419021316e-05	303.5	15.5	FFPE-ATAC in frozen liver
peak_14823	chr11	50463321	50464167	17.7215567547684	4.23967492993301	0.800646660632227	5.29531332408877	1.18812513485207e-07	2.49131203521462e-05	30.5	359	standard ATAC-Seq in frozen liver
peak_98548	chr8_random	790019	791272	18.6262132651595	3.24029401694347	0.612263777052466	5.2923170345676	1.20776280224838e-07	2.52753319588336e-05	75	540	standard ATAC-Seq in frozen liver
peak_68385	chr4	53605215	53605542	18.6327159553201	3.239583679968	0.612670712752839	5.2876424685162	1.23902852306589e-07	2.56287178390993e-05	20.5	141	standard ATAC-Seq in frozen liver
peak_76321	chr5	80929781	80930128	18.1129139120866	3.40893958000471	0.644926583804178	5.28577928963117	1.25170738692239e-07	2.5840991554072e-05	18.5	147.5	standard ATAC-Seq in frozen liver
peak_70404	chr4	104933558	104934158	17.7029033082695	3.89618225553902	0.73746046585826	5.28324220201367	1.26917417798293e-07	2.61008110421762e-05	24	257.5	standard ATAC-Seq in frozen liver
peak_18991	chr11	115027411	115027722	21.5955349864141	-3.13318422095169	0.594223763056888	-5.27273464264291	1.34405830101021e-07	2.72220171688885e-05	209.5	18	FFPE-ATAC in frozen liver
peak_74087	chr5	14989058	14989314	17.4112240710418	3.87113612941767	0.7351808834948	5.26555602345862	1.39765687937467e-07	2.79895185437168e-05	9	106.5	standard ATAC-Seq in frozen liver
peak_9416	chr10	57684170	57684653	17.4566044552534	4.21636128654605	0.801406284051664	5.26120317553466	1.43115781278382e-07	2.86068383815493e-05	12.5	204.5	standard ATAC-Seq in frozen liver
peak_88929	chr7	67020529	67020851	17.465513434491	4.21679524821882	0.801913110257784	5.25841914077609	1.45299048182243e-07	2.89890576745539e-05	10	135.5	standard ATAC-Seq in frozen liver
peak_70600	chr4	107730806	107731070	21.6191394579796	-3.13532559755411	0.596289696584871	-5.25805764464999	1.45584889029686e-07	2.89919971097684e-05	177	15	FFPE-ATAC in frozen liver
peak_105111	chrX	47958216	47959041	18.3348839440374	4.72490856651305	0.899580008518751	5.2523494539336	1.50171196742786e-07	2.97391807564385e-05	21	370	standard ATAC-Seq in frozen liver
peak_50605	chr19	23139018	23139349	20.3866903939219	-3.49868215410958	0.667244626077173	-5.24347745545563	1.57578070925865e-07	3.09765465565094e-05	217	16	FFPE-ATAC in frozen liver
peak_51968	chr19	44478061	44478274	20.9020379475366	-3.29325567096712	0.628884104335054	-5.2366654654902	1.63503660541839e-07	3.20824182654748e-05	140.5	12	FFPE-ATAC in frozen liver
peak_23956	chr12	116306003	116306619	18.3568064760257	3.21676505849969	0.614401233018533	5.23560970523419	1.6444111523931e-07	3.22072681732171e-05	39.5	261.5	standard ATAC-Seq in frozen liver
peak_37051	chr15	91738809	91739498	17.1827431765008	4.19222338813838	0.802849436737288	5.2216806742435	1.77306522234141e-07	3.42255996050484e-05	22.5	287	standard ATAC-Seq in frozen liver
peak_94790	chr8	58814149	58814766	18.0675253554454	4.70149497289835	0.900494120581795	5.22101684557451	1.77943351976108e-07	3.42358781854029e-05	17.5	273	standard ATAC-Seq in frozen liver
peak_96718	chr8	107581529	107581902	20.6585034721326	-3.27580569310241	0.627898211962937	-5.21709670562937	1.81749381576334e-07	3.48942497601286e-05	242	17	FFPE-ATAC in frozen liver
peak_46545	chr18	12896165	12896924	20.1650702780767	-3.48088344397557	0.668274429925947	-5.20876347814369	1.90103258235987e-07	3.63025934508897e-05	489	36.5	FFPE-ATAC in frozen liver
peak_96719	chr8	107582651	107582988	21.1519366661886	-3.10026071967013	0.595641444779709	-5.20491101960967	1.94089583455195e-07	3.69977646436989e-05	223	18	FFPE-ATAC in frozen liver
peak_68963	chr4	61745864	61746179	21.1171635456508	-4.61379942788375	0.887540052503275	-5.19841264050079	2.00997547355009e-07	3.80433216222961e-05	223	6.5	FFPE-ATAC in frozen liver
peak_8651	chr10	33606393	33606714	17.1041249919863	7.70556298529578	1.48554094548815	5.18704180366011	2.1366078324679e-07	4.00853868414535e-05	1.5	137.5	standard ATAC-Seq in frozen liver
peak_44448	chr17	53291724	53292080	17.7737979176758	4.6786979432591	0.902116091435889	5.18635903701935	2.14445201384e-07	4.01620935040343e-05	10	155	standard ATAC-Seq in frozen liver
peak_36798	chr15	85605657	85606038	20.4324288666687	-3.25837894151701	0.628677890435191	-5.18290684480959	2.18454162534429e-07	4.08413805721491e-05	244	18.5	FFPE-ATAC in frozen liver
peak_97299	chr8	116677154	116677502	19.8345133467979	-4.08365616683547	0.788044044874991	-5.18201513404403	2.1950139994119e-07	4.09655501017642e-05	226.5	9.5	FFPE-ATAC in frozen liver
peak_8351	chr10	24213227	24214149	16.8610952244596	3.82035018034877	0.737691796250758	5.17878902783696	2.23330858599626e-07	4.1535267283105e-05	33.5	371.5	standard ATAC-Seq in frozen liver
peak_104110	chrUn_random	2430156	2430451	17.5830093130566	3.36113309952255	0.64913147589259	5.17789265248741	2.2440628486006e-07	4.15455485557385e-05	17.5	121	standard ATAC-Seq in frozen liver
peak_97300	chr8	116677642	116677958	20.8910889401868	-4.59771815211974	0.888022858276938	-5.17747725665627	2.24906351076274e-07	4.15455485557385e-05	222.5	6	FFPE-ATAC in frozen liver
peak_93496	chr8	19774015	19774366	17.5895120032172	3.36035707802046	0.649037185967376	5.17744922890962	2.24940130483477e-07	4.15455485557385e-05	19.5	145	standard ATAC-Seq in frozen liver
peak_59755	chr2	161167120	161167791	17.080667139763	3.55772508069531	0.687852823133591	5.17221847616718	2.31330877009055e-07	4.25056574853459e-05	31	268.5	standard ATAC-Seq in frozen liver
peak_36537	chr15	82286548	82288826	20.660559845104	-4.5818408239501	0.888649908961952	-5.15595711848126	2.5233864351604e-07	4.59707703559826e-05	1576.5	59.5	FFPE-ATAC in frozen liver
peak_104192	chrUn_random	4058746	4059088	17.5177545973984	4.65620976818443	0.903663333064871	5.15259344693383	2.5690852610537e-07	4.67237089679969e-05	6.5	148	standard ATAC-Seq in frozen liver
peak_40171	chr16	45352977	45353342	20.6023359856012	5.49939432206782	1.06874230499754	5.14566916304533	2.66568860008578e-07	4.83162835939954e-05	6.5	186.5	standard ATAC-Seq in frozen liver
peak_15465	chr11	60747728	60748008	20.1868461907229	-3.2398234452962	0.630049173116151	-5.14217553730355	2.7157519281487e-07	4.91404053205235e-05	180.5	15	FFPE-ATAC in frozen liver
peak_75253	chr5	44246960	44247459	16.6305661293769	4.14247368694206	0.805831603863264	5.14061953773281	2.73834042289408e-07	4.94654369060591e-05	16.5	198.5	standard ATAC-Seq in frozen liver
peak_98558	chr8_random	833177	833475	18.1007631557483	3.19353962610049	0.621773846146741	5.13617554982653	2.80385762221934e-07	5.03935681113468e-05	20	125	standard ATAC-Seq in frozen liver
peak_93490	chr8	19752803	19753054	16.5718222763089	3.7953132938951	0.739178295274771	5.13450316135742	2.82890339174759e-07	5.06849142141358e-05	9.5	100	standard ATAC-Seq in frozen liver
peak_98029	chr8	126064969	126065173	16.5738704768507	3.79423693465573	0.739127140808502	5.13340225946156	2.8455083295927e-07	5.08006369379489e-05	7	80.5	standard ATAC-Seq in frozen liver
peak_66790	chr4	3017935	3018693	17.7957204496642	3.16743254590045	0.617095997144383	5.13280358413889	2.85457763802943e-07	5.08774375942424e-05	45.5	309.5	standard ATAC-Seq in frozen liver
peak_25835	chr13	41293174	41293414	20.6997874552606	-3.06561376391932	0.59732837366682	-5.13220851221319	2.86362001887624e-07	5.08774375942424e-05	155.5	13.5	FFPE-ATAC in frozen liver
peak_10086	chr10	69685001	69685309	16.5807312555465	3.79578070243877	0.739796779015637	5.13084242876724	2.88448301956287e-07	5.10984298472359e-05	12	122.5	standard ATAC-Seq in frozen liver
peak_93056	chr8	8488366	8489170	16.5872339457071	3.79492840648119	0.739645684864651	5.13073824959262	2.88608006692885e-07	5.10984298472359e-05	32.5	319	standard ATAC-Seq in frozen liver
peak_76893	chr5	93718526	93718880	17.8066776294436	3.16690659962246	0.617728765445495	5.12669439529589	2.94873574145496e-07	5.17791217496636e-05	21.5	143.5	standard ATAC-Seq in frozen liver
peak_104250	chrUn_random	5168985	5169270	16.7978968817729	3.53185174893314	0.689233711700206	5.12431659824176	2.98618853886729e-07	5.22651417607085e-05	13	113	standard ATAC-Seq in frozen liver
peak_93548	chr8	22130821	22131026	16.5759186773925	3.79312583248404	0.740526936365238	5.12219832421223	3.01994011551611e-07	5.25710719201624e-05	7.5	80	standard ATAC-Seq in frozen liver
peak_102208	chr9	85190633	85191218	17.2349843394082	4.63204515050565	0.904345404614638	5.12198671754125	3.02333192108584e-07	5.25710719201624e-05	13	244	standard ATAC-Seq in frozen liver
peak_46244	chr18	7033577	7033938	16.7869397019935	3.53244242156067	0.690029554039475	5.11926250242694	3.0673277245757e-07	5.32495064185715e-05	18	142	standard ATAC-Seq in frozen liver
peak_13369	chr11	5423111	5423471	20.7038838563443	-3.06694167194661	0.599381493881432	-5.11684411890318	3.10690182775233e-07	5.3761969993205e-05	232.5	19.5	FFPE-ATAC in frozen liver
peak_46539	chr18	12869084	12869464	19.1692949107272	-4.03136992972781	0.790628629414897	-5.09894251199988	3.41556255977687e-07	5.83477387507954e-05	237.5	9.5	FFPE-ATAC in frozen liver
peak_33707	chr15	7020172	7020722	16.3611593402431	4.11729108481139	0.807950365080106	5.09597032535925	3.46959477510251e-07	5.91316537124817e-05	16.5	219	standard ATAC-Seq in frozen liver
peak_52444	chr19	55196064	55196791	20.4846700295761	-3.04791826555144	0.598631850890345	-5.09147360104256	3.55291345717835e-07	6.02131556572418e-05	466.5	43	FFPE-ATAC in frozen liver
peak_64646	chr3	104857820	104858295	16.3024154871751	3.76968164936614	0.741323411235208	5.08507028408157	3.67489957772419e-07	6.21819756237733e-05	16	183.5	standard ATAC-Seq in frozen liver
peak_79986	chr5	147478060	147478279	17.5263136605304	3.14267349121423	0.619253472585755	5.07493882608633	3.87620685584547e-07	6.51757366284998e-05	13.5	88	standard ATAC-Seq in frozen liver
peak_74123	chr5	15149435	15149834	17.5109019911322	3.14298311227599	0.619480514286076	5.07357865145789	3.9040300063697e-07	6.55405125355054e-05	26	160	standard ATAC-Seq in frozen liver
peak_70190	chr4	101418004	101418547	17.5307681501492	3.14289744584741	0.619892955306089	5.07006478932401	3.97680300522421e-07	6.64492713399487e-05	35.5	217.5	standard ATAC-Seq in frozen liver
peak_98511	chr8_random	381998	382284	17.281577436138	4.63326370543695	0.915067590801165	5.06330215605211	4.12055980126909e-07	6.84236870478129e-05	8	122	standard ATAC-Seq in frozen liver
peak_69077	chr4	62893212	62893702	20.2606436246539	-3.03072593295739	0.599274110515679	-5.0573283240109	4.25170883348889e-07	7.02741098832254e-05	309.5	27.5	FFPE-ATAC in frozen liver
peak_89093	chr7	72953653	72954113	20.2606436246539	-3.03072593295739	0.599274110515679	-5.0573283240109	4.25170883348889e-07	7.02741098832254e-05	290	27.5	FFPE-ATAC in frozen liver
peak_37050	chr15	91737351	91738525	16.0739345926341	4.09070987171291	0.809106738471835	5.05583463491981	4.28512525406252e-07	7.07171311024987e-05	34.5	447.5	standard ATAC-Seq in frozen liver
peak_94761	chr8	57988514	57988768	17.0397412451702	3.31103274083719	0.655296975634585	5.0527209249376	4.35560090061322e-07	7.15489408157722e-05	14.5	102	standard ATAC-Seq in frozen liver
peak_11546	chr10	94263592	94264120	16.5418535614954	3.50692680506262	0.694284920425229	5.05113491866528	4.39192705843477e-07	7.20350134512202e-05	23	206.5	standard ATAC-Seq in frozen liver
peak_33045	chr14	106296141	106296906	16.0261479193455	3.7419834348925	0.7427052816772	5.03831536843556	4.69647154965163e-07	7.58892945176581e-05	33	291.5	standard ATAC-Seq in frozen liver
peak_90932	chr7	116587818	116588348	16.6560803545715	4.58179826752022	0.909412621918067	5.03819515706371	4.69942151260784e-07	7.58892945176581e-05	14	214	standard ATAC-Seq in frozen liver
peak_82415	chr6	55120188	55120604	19.5431840256758	-3.18781487305023	0.632757964727614	-5.03796878230131	4.70498155632718e-07	7.58892945176581e-05	253	21.5	FFPE-ATAC in frozen liver
peak_9548	chr10	59443623	59444034	16.7456557188655	3.28294228170464	0.653077596099747	5.02687934988237	4.98525776227225e-07	7.98081556646155e-05	22.5	159.5	standard ATAC-Seq in frozen liver
peak_1010	chr1	39957351	39958162	16.0439658778207	3.74294450895275	0.745220670530489	5.02259888509039	5.09769360931652e-07	8.13140254607438e-05	35	309.5	standard ATAC-Seq in frozen liver
peak_74100	chr5	15031369	15031761	17.2390889129214	3.11657973382585	0.620798070949874	5.02027934632145	5.15963896830214e-07	8.19861265425352e-05	24	155.5	standard ATAC-Seq in frozen liver
peak_68962	chr4	61745065	61745314	19.3150693920995	-4.4801420013111	0.892473671786193	-5.01991503272535	5.16943400973616e-07	8.20198966716878e-05	160	6	FFPE-ATAC in frozen liver
peak_94763	chr8	57993482	57993734	16.2546288138865	3.47986065830955	0.693674011149202	5.01656484512733	5.26035272867084e-07	8.33330542264289e-05	13	96.5	standard ATAC-Seq in frozen liver
peak_40579	chr16	58650145	58650515	16.2368108554113	3.47890595115921	0.693521209019198	5.01629352630643	5.26778300312009e-07	8.33330542264289e-05	18.5	139.5	standard ATAC-Seq in frozen liver
peak_98533	chr8_random	716388	716774	17.2411371134632	3.11558018518566	0.621695511985067	5.01142460436564	5.40285518597073e-07	8.5092184202139e-05	23	150.5	standard ATAC-Seq in frozen liver
peak_105501	chrX	72975299	72975626	15.791164334644	4.06386998373061	0.811421451475992	5.00833441898578	5.49030793257869e-07	8.62155712190944e-05	9	124.5	standard ATAC-Seq in frozen liver
peak_105109	chrX	47953012	47953752	18.9547138234669	5.37605985544912	1.07356871070022	5.00765326137593	5.50976756234897e-07	8.63942864149613e-05	11.5	354	standard ATAC-Seq in frozen liver
peak_66794	chr4	3103892	3104238	18.9680772923233	5.37667075398037	1.07530255184924	5.0001469304931	5.72866415338617e-07	8.90432581248493e-05	6	165	standard ATAC-Seq in frozen liver
peak_42641	chr17	24880825	24881209	19.3020558393488	-3.16794138629701	0.633615117602266	-4.99978819679235	5.73933261271243e-07	8.90796067156538e-05	233.5	18.5	FFPE-ATAC in frozen liver
peak_83657	chr6	90462504	90462845	19.2996495502718	-3.16903250526492	0.634418149821336	-4.99517945089903	5.87810831971804e-07	9.05954591976828e-05	208.5	14.5	FFPE-ATAC in frozen liver
peak_6775	chr1	186558845	186559365	15.7502384400511	3.71627436861906	0.745317514667546	4.98616266957946	6.15902943453467e-07	9.43610958022497e-05	20.5	195.5	standard ATAC-Seq in frozen liver
peak_55712	chr2	66027262	66027574	35.064634249157	7.28834544250424	1.46274761852601	4.98264044336549	6.27224350128348e-07	9.55835500488409e-05	2.5	279.5	standard ATAC-Seq in frozen liver
peak_22599	chr12	86873361	86874369	15.7546929296699	3.71652663861501	0.745965301494013	4.98217092828792	6.28748567909879e-07	9.56440157947575e-05	42	372	standard ATAC-Seq in frozen liver
peak_104193	chrUn_random	4062755	4064499	16.1415874249397	4.53187743917056	0.910021225372705	4.97996894227879	6.35944780441654e-07	9.64642537243262e-05	50	690	standard ATAC-Seq in frozen liver
peak_38031	chr16	5709127	5709475	15.7591474192887	3.71678456708223	0.746929782112943	4.97608296802418	6.48838452962745e-07	9.78637430812973e-05	13	130.5	standard ATAC-Seq in frozen liver
peak_79137	chr5	135589562	135589815	18.5996498212337	-3.35476561315678	0.675400939502266	-4.96707276662816	6.79710884646758e-07	0.000101344946962896	149	11	FFPE-ATAC in frozen liver
peak_81581	chr6	37568973	37569473	15.9718585558963	3.45253679403187	0.69511735288275	4.96684017412845	6.80526284787896e-07	0.000101344946962896	21.5	183.5	standard ATAC-Seq in frozen liver
peak_49165	chr18	78394942	78395194	15.9674040662775	3.45229411267445	0.695080487725728	4.96675446029309	6.80827009620584e-07	0.000101344946962896	13	92.5	standard ATAC-Seq in frozen liver
peak_68542	chr4	57688192	57688715	15.9674040662775	3.45229411267445	0.695080487725728	4.96675446029309	6.80827009620584e-07	0.000101344946962896	22.5	197.5	standard ATAC-Seq in frozen liver
peak_59701	chr2	160447366	160447981	15.5351210143665	4.03801075553486	0.813895081624338	4.96134065274847	7.00082893075849e-07	0.000103121438708868	20	231	standard ATAC-Seq in frozen liver
peak_73937	chr5	5944774	5945327	18.3936277971053	5.33194782495176	1.07480668135198	4.96084358002392	7.01876956323748e-07	0.000103243493579512	11.5	252.5	standard ATAC-Seq in frozen liver
peak_52994	chr2	4427710	4428076	15.9698103553545	3.45365309144999	0.696241951427197	4.96042084848591	7.03406187997422e-07	0.000103326310904198	18.5	137.5	standard ATAC-Seq in frozen liver
peak_70601	chr4	107731363	107731762	19.0800776349684	-3.15058149308311	0.635451773717367	-4.95801825314349	7.12158738546744e-07	0.000104182685829617	239	20	FFPE-ATAC in frozen liver
peak_5776	chr1	167614636	167615317	15.5395755039853	4.03826505178691	0.814792336976722	4.95618928716346	7.18891829821453e-07	0.000104880727679777	23	253.5	standard ATAC-Seq in frozen liver
peak_5597	chr1	164906695	164907103	15.9540405974211	3.4515561515269	0.696898164796937	4.95274105440156	7.31753224497764e-07	0.000106611659502134	17	150.5	standard ATAC-Seq in frozen liver
peak_35555	chr15	66918840	66919360	15.5440299936041	4.03852454394265	0.815995182218206	4.94920145602367	7.45185851017621e-07	0.000108273681687464	18.5	197	standard ATAC-Seq in frozen liver
peak_40218	chr16	45970095	45970659	18.3605698354485	-3.33482655643956	0.675954087247507	-4.93351045485799	8.07647168956187e-07	0.000115466551605623	329	21.5	FFPE-ATAC in frozen liver
peak_86372	chr6	142486851	142487493	15.4763771612985	3.68893982512778	0.747841642483157	4.93278204310595	8.1066598575784e-07	0.000115655741413572	28	234	standard ATAC-Seq in frozen liver
peak_105112	chrX	47960906	47961163	18.1019485598776	5.30886063269785	1.07626522851852	4.93266946847805	8.11133506580194e-07	0.000115655741413572	3	115.5	standard ATAC-Seq in frozen liver
peak_73348	chr4	149263928	149264462	15.465061892984	3.68700836597994	0.747541565120344	4.93217840721189	8.1317591581351e-07	0.000115792568923011	18	197	standard ATAC-Seq in frozen liver
peak_83300	chr6	85797072	85797290	18.4323272412673	-4.40993001981607	0.895615114690379	-4.92391201028425	8.48309920222203e-07	0.00012031487341995	134.5	4	FFPE-ATAC in frozen liver
peak_78842	chr5	126003146	126004123	17.8303071478833	-3.91961868291908	0.796141949586819	-4.92326611473404	8.51115857155715e-07	0.000120552951852152	568.5	32	FFPE-ATAC in frozen liver
peak_57584	chr2	118372319	118372783	17.8671366413925	-3.57846873143952	0.727260690188618	-4.92047594448069	8.63340112726921e-07	0.000121961331987984	264.5	17.5	FFPE-ATAC in frozen liver
peak_92558	chr7	147947068	147947329	18.8738691885214	-3.13070391239916	0.636407394042114	-4.91933931269188	8.68368223065947e-07	0.00012250980132777	153.5	13	FFPE-ATAC in frozen liver
peak_46598	chr18	13380339	13380775	15.2503025558346	4.01139145274604	0.816614997293402	4.91221869062096	9.00515303578111e-07	0.000126483068949208	14	162	standard ATAC-Seq in frozen liver
peak_8708	chr10	36860784	36861274	15.261259735614	4.01067307713567	0.816495773880015	4.91205613726182	9.0126238827085e-07	0.000126483068949208	15.5	181.5	standard ATAC-Seq in frozen liver
peak_104108	chrUn_random	2427705	2428021	15.7044999673043	3.4242945630694	0.698024153270108	4.90569638174731	9.3096440656921e-07	0.000129001936914024	15.5	114	standard ATAC-Seq in frozen liver
peak_87902	chr7	30018868	30019109	15.6955909880668	3.42379716886892	0.697951490919866	4.90549445543346	9.31922733407374e-07	0.000129001936914024	10.5	89	standard ATAC-Seq in frozen liver
peak_29517	chr14	15177762	15179075	16.695820845035	3.06457038836053	0.624791531325106	4.9049486664151	9.34517761700524e-07	0.000129001936914024	82	497.5	standard ATAC-Seq in frozen liver
peak_94774	chr8	58693563	58694405	16.6869118657975	3.06410226580059	0.624706123263443	4.90486990874017	9.34892799711689e-07	0.000129001936914024	50.5	319.5	standard ATAC-Seq in frozen liver
peak_64922	chr3	110382079	110382656	15.6781311181268	3.42532612661171	0.698687606916116	4.9025145039147	9.46176266279179e-07	0.000129721979153371	27.5	210	standard ATAC-Seq in frozen liver
peak_26927	chr13	60998610	60999131	15.7069062563813	3.42568476600849	0.698904319556568	4.90150750274655	9.51040168363404e-07	0.000130095743754947	24.5	191.5	standard ATAC-Seq in frozen liver
peak_104253	chrUn_random	5186536	5186748	15.2592115350721	4.01194032839301	0.818521699791987	4.90144650949703	9.51335542845629e-07	0.000130095743754947	6	78	standard ATAC-Seq in frozen liver
peak_80333	chr6	3000373	3001045	16.2047939400561	3.23129738486698	0.659389677876695	4.90043671182736	9.56238584858819e-07	0.000130432650543645	37	249	standard ATAC-Seq in frozen liver
peak_83325	chr6	85884962	85885199	18.1389497196033	-3.31487877773745	0.676561822302286	-4.8995947871507	9.60345113200829e-07	0.000130584460897529	137	11	FFPE-ATAC in frozen liver
peak_41146	chr16	89830360	89830876	15.2701687148515	4.01120439772326	0.819005269624539	4.89765395473235	9.69876396938816e-07	0.000131454514590925	16.5	193.5	standard ATAC-Seq in frozen liver
peak_78830	chr5	125951099	125951542	18.1499068993827	-3.31480178910657	0.676962622334433	-4.89658022429043	9.75188465901506e-07	0.000131649391243885	254	16.5	FFPE-ATAC in frozen liver
peak_40221	chr16	45977405	45977657	18.6518909841411	-3.11288607781626	0.637025033646552	-4.88659929107813	1.02592599148549e-06	0.000137828517089783	146.5	13	FFPE-ATAC in frozen liver
peak_9253	chr10	52028903	52029520	15.2045640830878	3.65987161454595	0.749764859263876	4.88135922793079	1.05357119377234e-06	0.000140323078698067	22.5	222	standard ATAC-Seq in frozen liver
peak_74127	chr5	15160891	15161299	15.1846979240708	3.66004489399914	0.74984116648624	4.8810935669885	1.05499168005354e-06	0.000140323078698067	18.5	146.5	standard ATAC-Seq in frozen liver
peak_51295	chr19	36806665	36807011	17.6366075463098	-3.55911388960207	0.729466966775308	-4.8790610839248	1.06592050742163e-06	0.000141369474727496	196.5	13	FFPE-ATAC in frozen liver
peak_98547	chr8_random	785707	786091	15.2069703721648	3.66135022004495	0.751679857141645	4.87089042663413	1.11096440787169e-06	0.000146312097060826	14.5	139	standard ATAC-Seq in frozen liver
peak_9689	chr10	61391482	61392459	15.3045919192838	4.45329886851479	0.915331901793203	4.86522851414929	1.14324640626532e-06	0.000149459202248908	23.5	363	standard ATAC-Seq in frozen liver
peak_78841	chr5	125995897	125996441	17.9258804944605	-3.29576034341147	0.677752286841943	-4.86278011508956	1.15748406167948e-06	0.000150951448868222	309	23.5	FFPE-ATAC in frozen liver
peak_46541	chr18	12874799	12875626	17.3781579369554	-3.88027725473106	0.798002824296173	-4.86248561607963	1.15920805010184e-06	0.00015099214332502	466.5	28	FFPE-ATAC in frozen liver
peak_24095	chr12	118016431	118016933	14.9873984568614	3.98280990484366	0.81937025708433	4.86081825695773	1.16901540949227e-06	0.000151729173348082	14	180	standard ATAC-Seq in frozen liver
peak_97281	chr8	116616428	116616709	17.9214260048417	-3.29618306970334	0.678320201694007	-4.85933201085799	1.17782472444003e-06	0.000152303988158274	160	10.5	FFPE-ATAC in frozen liver
peak_37588	chr15	100504280	100504855	15.4196815087724	3.39704566238067	0.699755730437193	4.85461642487482	1.20619988255778e-06	0.000155131050563436	26	206.5	standard ATAC-Seq in frozen liver
peak_104338	chrX	4253434	4253865	15.4152270191536	3.39679220967166	0.699721060693534	4.85449474152587	1.2069407238592e-06	0.000155131050563436	19	156	standard ATAC-Seq in frozen liver
peak_90150	chr7	97171453	97172094	15.4107725295348	3.3965380213056	0.700031451235752	4.85197917223541	1.22235462553216e-06	0.00015636050394711	27.5	227.5	standard ATAC-Seq in frozen liver
peak_47614	chr18	43073454	43073808	15.8997512339719	3.20222312259044	0.660881430494911	4.84538220447866	1.26368170351342e-06	0.000160685918777672	18	128	standard ATAC-Seq in frozen liver
peak_71290	chr4	120694549	120694829	15.9017994345138	3.20110135533004	0.66196857744992	4.83573006994009	1.32657839132456e-06	0.00016768672173742	15.5	101	standard ATAC-Seq in frozen liver
peak_101327	chr9	66468372	66469075	14.9108366453182	3.63160855823292	0.752202776249275	4.82796484259376	1.37935437136698e-06	0.000173537384846604	30	243	standard ATAC-Seq in frozen liver
peak_53560	chr2	19430818	19431166	14.686810240396	3.95279024688455	0.820394888190841	4.8181556269827	1.44891340200317e-06	0.000180378754711079	11.5	123.5	standard ATAC-Seq in frozen liver
peak_98034	chr8	126081811	126082218	14.8974731764618	3.63081944291028	0.754743553995123	4.81066638289401	1.50427921138692e-06	0.000184479489204708	16	141.5	standard ATAC-Seq in frozen liver
peak_104151	chrUn_random	3549363	3549886	15.9463443307017	3.20361120345623	0.665990729128805	4.81029399260097	1.50708461302449e-06	0.000184611822946422	27.5	192.5	standard ATAC-Seq in frozen liver
peak_54007	chr2	27426811	27427810	18.2041962628319	-3.07316175535904	0.639022140279148	-4.80916319114791	1.51563436652901e-06	0.000185446708835522	566.5	52.5	FFPE-ATAC in frozen liver
peak_101982	chr9	77953395	77953819	18.1846881923501	-3.07213563231365	0.639410223394918	-4.80463952547129	1.55030560134862e-06	0.000189255856966461	241.5	20.5	FFPE-ATAC in frozen liver
peak_74085	chr5	14982241	14982443	14.937563583031	3.63324494419781	0.756651094468823	4.80174412058227	1.57289602376627e-06	0.000191140827142661	8	72.5	standard ATAC-Seq in frozen liver
peak_74135	chr5	15184079	15184523	15.6392534240757	3.17507956440072	0.661913032332243	4.7968228593617	1.61202038310255e-06	0.000194568676917159	23.5	158.5	standard ATAC-Seq in frozen liver
peak_103645	chr9	118583244	118583831	15.1458202300198	3.36860859958891	0.702481500041815	4.79529866535758	1.62432639192733e-06	0.000195832965080402	26.5	205	standard ATAC-Seq in frozen liver
peak_29974	chr14	25613968	25614275	12.4083928466233	7.24274337334615	1.51061860496393	4.79455459475099	1.63036660731488e-06	0.000196118981574405	0.5	97.5	standard ATAC-Seq in frozen liver
peak_75692	chr5	64727966	64728777	15.1502747196386	3.36886990222891	0.703057227938057	4.79174350018306	1.65338195947319e-06	0.000197996655502915	40.5	282.5	standard ATAC-Seq in frozen liver
peak_55247	chr2	52814090	52814552	15.1393175398592	3.36953916319255	0.703344509925176	4.79073784702039	1.66169116315559e-06	0.000198769117781538	21.5	164	standard ATAC-Seq in frozen liver
peak_68354	chr4	53325362	53325987	15.6258899552194	3.1743269332841	0.662879886888796	4.78869097715831	1.67872757097805e-06	0.000200582623142818	34	223.5	standard ATAC-Seq in frozen liver
peak_25863	chr13	41439882	41440457	16.1391893082923	3.00988695984623	0.628872596311832	4.78616333021728	1.6999972911185e-06	0.00020289733294076	36.5	212	standard ATAC-Seq in frozen liver
peak_8644	chr10	33570506	33570995	14.7345969136847	4.39679837549859	0.920006740899139	4.77909365229381	1.76087164926471e-06	0.000207843105188432	11.5	176	standard ATAC-Seq in frozen liver
peak_49865	chr19	7164353	7164902	16.1415955973693	3.01120434061542	0.630377283284248	4.77682876661914	1.78081292007767e-06	0.000209789553509921	34	203	standard ATAC-Seq in frozen liver
peak_95552	chr8	77678597	77679448	14.647932546345	3.6018811772889	0.754656861202354	4.77287276173467	1.81616538639795e-06	0.000213369898039445	32.5	293.5	standard ATAC-Seq in frozen liver
peak_102111	chr9	81118609	81118912	14.647932546345	3.6018811772889	0.754656861202354	4.77287276173467	1.81616538639795e-06	0.000213369898039445	11	104.5	standard ATAC-Seq in frozen liver
peak_11552	chr10	94334648	94334998	14.6434780567262	3.60161242118921	0.754626939231039	4.77270586822574	1.81767154278546e-06	0.000213369898039445	15	120.5	standard ATAC-Seq in frozen liver
peak_95373	chr8	73956863	73957203	14.6458843458032	3.60314324546862	0.755230826861836	4.77091654274831	1.83389518768346e-06	0.000214744229623666	13	117.5	standard ATAC-Seq in frozen liver
peak_103910	chr9	121937457	121937973	14.6458843458032	3.60314324546862	0.755230826861836	4.77091654274831	1.83389518768346e-06	0.000214744229623666	22	177.5	standard ATAC-Seq in frozen liver
peak_572	chr1	26743682	26745258	14.6523870359638	3.6021487004496	0.755048573511222	4.77075095142347	1.83540360276448e-06	0.000214744229623666	63.5	550	standard ATAC-Seq in frozen liver
peak_68800	chr4	60735572	60735980	17.9716189672073	-3.05274326756943	0.640202836283803	-4.76840009845902	1.85694716628264e-06	0.000216429469513789	229	18	FFPE-ATAC in frozen liver
peak_68961	chr4	61743917	61744730	17.9846243475285	-3.0534349442433	0.640361810898885	-4.76829644159628	1.85790266426335e-06	0.000216429469513789	455.5	42	FFPE-ATAC in frozen liver
peak_104339	chrX	4261120	4261411	14.650338835422	3.60342028326291	0.755990279027589	4.76649023569178	1.87462810564223e-06	0.000217903103249212	10.5	100	standard ATAC-Seq in frozen liver
peak_66075	chr3	138075424	138075646	16.7105332118077	-3.82122771941232	0.802102212838696	-4.76401592995079	1.89777512732057e-06	0.000219876678592128	120	6.5	FFPE-ATAC in frozen liver
peak_93494	chr8	19766877	19767191	15.1680926781137	3.36996487639331	0.709193553208838	4.75182672085141	2.01587097283452e-06	0.00022933534677016	13	111.5	standard ATAC-Seq in frozen liver
peak_105116	chrX	47973133	47973560	16.1849196086095	5.14248399371856	1.0831795572717	4.74758220758095	2.05862726177571e-06	0.000233702272555237	6	173.5	standard ATAC-Seq in frozen liver
peak_28598	chr13	105299662	105300627	14.4761473043303	4.36783497675157	0.9212016079592	4.74145392171854	2.1218992123606e-06	0.000240374766812108	26	336	standard ATAC-Seq in frozen liver
peak_97301	chr8	116679058	116679348	16.747720793852	-3.47654414413735	0.733268712588405	-4.74115980193033	2.1249823745402e-06	0.000240469301747041	155	9	FFPE-ATAC in frozen liver
peak_104114	chrUn_random	2439955	2440168	14.480601793949	4.36810240590576	0.921373829227027	4.74085790950923	2.12815148917951e-06	0.000240573353172693	6	75.5	standard ATAC-Seq in frozen liver
peak_58661	chr2	141809613	141810264	14.8630499720296	3.33906905216226	0.70504941299414	4.73593622038802	2.18046157893931e-06	0.000245448821884411	27	226	standard ATAC-Seq in frozen liver
peak_571	chr1	26742825	26743524	15.3609376557044	3.14639332192657	0.664437198728917	4.73542620423072	2.18595234779588e-06	0.000245808157855882	37.5	246.5	standard ATAC-Seq in frozen liver
peak_6437	chr1	181481905	181482335	15.3564831660856	3.14613697757999	0.664587355507403	4.7339705630992	2.20169672262628e-06	0.000246800048030327	22.5	151	standard ATAC-Seq in frozen liver
peak_24024	chr12	116855501	116855743	16.1594135558444	3.01229006395325	0.636492354440958	4.73264139456788	2.21616822871283e-06	0.000247384983518081	16.5	89	standard ATAC-Seq in frozen liver
peak_84584	chr6	114504444	114504758	15.3763493251025	3.14602135828434	0.665146844547433	4.72981475304885	2.24724796516526e-06	0.000249544233919796	16	112	standard ATAC-Seq in frozen liver
peak_83320	chr6	85869137	85869536	17.7475925622852	-3.03314828677525	0.641477134702198	-4.72838098614906	2.26317221161506e-06	0.000249852089113013	220.5	20	FFPE-ATAC in frozen liver
peak_29208	chr13	120283872	120284203	14.8784616414278	3.33864620492284	0.706105172475962	4.72825626417075	2.2645625574472e-06	0.000249852089113013	15.5	114	standard ATAC-Seq in frozen liver
peak_15438	chr11	60544528	60545461	17.7585497420646	-3.03308381544805	0.641501628461245	-4.72809994687533	2.26630627217033e-06	0.000249852089113013	518	46.5	FFPE-ATAC in frozen liver
peak_70619	chr4	107788045	107788353	17.7410898721246	-3.03279771303049	0.64161678524282	-4.72680544335	2.28079605034265e-06	0.000250932148999581	171.5	15.5	FFPE-ATAC in frozen liver
peak_98556	chr8_random	824336	825152	14.4919170622636	4.37030506027152	0.925419630418463	4.72251173048417	2.32949648871059e-06	0.000255501564108946	23	285.5	standard ATAC-Seq in frozen liver
peak_30780	chr14	42011091	42012020	14.1479966621285	3.89470667202705	0.825398229132099	4.71857890478189	2.37497850718833e-06	0.00025971667201879	26	317	standard ATAC-Seq in frozen liver
peak_2881	chr1	90004374	90004612	17.7499988513621	-3.03195486753509	0.642559515900172	-4.71855881441203	2.37521302082848e-06	0.00025971667201879	132.5	12.5	FFPE-ATAC in frozen liver
peak_38030	chr16	5661946	5662483	14.1524511517473	3.89498759606678	0.825959592176248	4.71571204325411	2.40866893172211e-06	0.000262302084408789	19	181.5	standard ATAC-Seq in frozen liver
peak_98530	chr8_random	709353	709639	14.3675685774318	3.57327912842501	0.757893292928075	4.7147522768276	2.42004995710856e-06	0.000263273369647235	12	97.5	standard ATAC-Seq in frozen liver
peak_102292	chr9	88255859	88256542	14.3651622883549	3.57170833416294	0.757648159460135	4.71420446227702	2.42656913228716e-06	0.00026344657506361	26.5	233.5	standard ATAC-Seq in frozen liver
peak_996	chr1	39770654	39771566	14.156905641366	3.89527211683852	0.826885875071469	4.71077355929178	2.46778308083109e-06	0.000267649345721091	31	311.5	standard ATAC-Seq in frozen liver
peak_28486	chr13	103156847	103157091	11.6046269688407	7.14504063178486	1.51686350490715	4.71040446860922	2.47225662951855e-06	0.000267862869001099	0	72.5	standard ATAC-Seq in frozen liver
peak_51969	chr19	44479989	44481144	17.0410901430864	-3.21483529308837	0.683053644798405	-4.70656341206874	2.51927644789716e-06	0.000272405363055282	618.5	49	FFPE-ATAC in frozen liver
peak_51242	chr19	34955621	34956061	16.5366997692511	-3.45687070081674	0.7347265581688	-4.70497583404701	2.53896027129894e-06	0.000274109776152794	232.5	18	FFPE-ATAC in frozen liver
peak_97280	chr8	116614701	116615154	16.5236943889299	-3.45612393292535	0.734582959657921	-4.70487898948104	2.54016577831678e-06	0.000274109776152794	242	13	FFPE-ATAC in frozen liver
peak_94400	chr8	42303173	42303751	14.2002378250359	4.34018242581275	0.924335266622314	4.69546341304552	2.66002978691349e-06	0.000284460925382742	12.5	197.5	standard ATAC-Seq in frozen liver
peak_23285	chr12	105189212	105189418	17.541026027303	-3.01357852566383	0.643403014708129	-4.68381163403609	2.8158880112649e-06	0.000297851877385418	112	10.5	FFPE-ATAC in frozen liver
peak_49695	chr19	5148986	5149237	15.6461060303419	5.09169359530809	1.08725237273576	4.68308345236929	2.82591393892192e-06	0.000298617006634755	4	97.5	standard ATAC-Seq in frozen liver
peak_8560	chr10	29690636	29690979	14.5936431828958	3.30972614466187	0.708181591530869	4.673555743672	2.96029309572913e-06	0.000310059533167656	17	115	standard ATAC-Seq in frozen liver
peak_95458	chr8	74819471	74820120	15.0870763769518	3.11738829416487	0.667273468910963	4.6718301257394	2.98527813876779e-06	0.000311760409064149	39	223	standard ATAC-Seq in frozen liver
peak_66411	chr3	146515019	146515704	15.0980335567312	3.11674475674932	0.66758365908787	4.6686953976791	3.03118400996867e-06	0.000314586628551683	40.5	237	standard ATAC-Seq in frozen liver
peak_42642	chr17	24881357	24882014	16.8150155376225	-3.19359630194083	0.684239385749142	-4.66736696024055	3.0508416601256e-06	0.000316137554546677	346	28.5	FFPE-ATAC in frozen liver
peak_83722	chr6	91108067	91108397	16.3171278539477	-3.43569740922333	0.736283252382438	-4.66627129994635	3.06714674538268e-06	0.000316937042584639	171.5	12.5	FFPE-ATAC in frozen liver
peak_68462	chr4	55663882	55664866	13.8696808937571	3.86419640462093	0.82820792270188	4.6657322378838	3.07519945499213e-06	0.000316937042584639	32	327	standard ATAC-Seq in frozen liver
peak_14723	chr11	49426803	49427347	13.8652264041383	3.86391016950705	0.828182714122656	4.66552863712004	3.07824619237783e-06	0.000316937042584639	18	182	standard ATAC-Seq in frozen liver
peak_83442	chr6	87407241	87408057	13.8652264041383	3.86391016950705	0.828182714122656	4.66552863712004	3.07824619237783e-06	0.000316937042584639	24	271	standard ATAC-Seq in frozen liver
peak_70612	chr4	107759709	107760006	16.2996679840077	-3.43542190582229	0.737211714841708	-4.66002077376094	3.16177471976251e-06	0.000322016215958746	156	10	FFPE-ATAC in frozen liver
peak_93488	chr8	19737146	19737505	15.1069425359688	3.11727213680053	0.66963128891346	4.6552068106892	3.23655668400453e-06	0.000327759597756402	19	125.5	standard ATAC-Seq in frozen liver
peak_42505	chr17	23668626	23669001	13.9239702572063	4.3089075821501	0.926263304905364	4.65192517001453	3.28850419285487e-06	0.000330827234129545	8.5	127	standard ATAC-Seq in frozen liver
peak_84587	chr6	114514237	114514458	13.9085585878081	4.30947174456271	0.927178014093439	4.64794427721235	3.3525944572918e-06	0.00033601040175101	6	74	standard ATAC-Seq in frozen liver
peak_97282	chr8	116616978	116617784	15.8106892795705	-3.73512580446736	0.80620741288544	-4.63295889465868	3.60476133812251e-06	0.000354636221469626	410	24	FFPE-ATAC in frozen liver
peak_99092	chr9	22015953	22016487	15.8106892795705	-3.73512580446736	0.80620741288544	-4.63295889465868	3.60476133812251e-06	0.000354636221469626	272.5	12.5	FFPE-ATAC in frozen liver
peak_37246	chr15	96873829	96874134	16.0715451780019	-3.41266556768565	0.737713452375754	-4.62600425232236	3.72787647141262e-06	0.000364068841987575	159.5	10.5	FFPE-ATAC in frozen liver
peak_70323	chr4	104478016	104478297	15.9954799019065	-4.19374128121376	0.906781653364665	-4.62486340085581	3.74845351680918e-06	0.000365411003312723	147.5	6	FFPE-ATAC in frozen liver
peak_47822	chr18	47745033	47745670	15.0850200039804	5.03777749602068	1.08940024173942	4.62435870950145	3.75759111435e-06	0.000365968156810086	10	238	standard ATAC-Seq in frozen liver
peak_80401	chr6	4712303	4712678	10.7696796637266	7.03761624525524	1.52402870053797	4.61777146504591	3.87883084804024e-06	0.000375383069736267	1.5	102	standard ATAC-Seq in frozen liver
peak_87332	chr7	20026648	20027454	13.5913651253857	3.83302568168629	0.831279645147478	4.61099427137576	4.00747582788283e-06	0.000385745769889178	21.5	256.5	standard ATAC-Seq in frozen liver
peak_6580	chr1	182887074	182887633	14.3108729249057	3.27893945136073	0.711113926743469	4.61099034633812	4.00755150456688e-06	0.000385745769889178	23	185	standard ATAC-Seq in frozen liver
peak_77449	chr5	106605655	106606023	14.3108729249057	3.27893945136073	0.711113926743469	4.61099034633812	4.00755150456688e-06	0.000385745769889178	15.5	122.5	standard ATAC-Seq in frozen liver
peak_23339	chr12	105499361	105499693	13.5958196150045	3.83331998707694	0.831500334451498	4.61012440795421	4.02428075401039e-06	0.000387007697439854	11.5	107.5	standard ATAC-Seq in frozen liver
peak_28819	chr13	111393120	111393471	13.5869106357669	3.83273142757041	0.831451297570665	4.60968843126337	4.03272879237748e-06	0.000387412190664556	12	113.5	standard ATAC-Seq in frozen liver
peak_27097	chr13	64461646	64461853	14.3064184352869	3.27865926850958	0.711496047203302	4.60812014542752	4.06325864894769e-06	0.000389704768304769	8.5	68.5	standard ATAC-Seq in frozen liver
peak_28977	chr13	113543588	113544309	13.6002741046233	3.83361625787119	0.832116169073872	4.60706858050592	4.08385340919928e-06	0.000391329032012869	22	233	standard ATAC-Seq in frozen liver
peak_102532	chr9	96019433	96020171	14.815263298741	3.08659236495247	0.67004774079805	4.60652603839277	4.09451810853144e-06	0.000391999706363692	39.5	247.5	standard ATAC-Seq in frozen liver
peak_90676	chr7	108602315	108602631	14.8197177883598	3.08686085612818	0.670285262432304	4.60529423685477	4.11883069427834e-06	0.000392936161099257	17	107	standard ATAC-Seq in frozen liver
peak_81579	chr6	37562614	37563282	13.6456544888349	4.27837007128936	0.929064623988541	4.60502957579205	4.12407244679597e-06	0.000392936161099257	16	221.5	standard ATAC-Seq in frozen liver
peak_55098	chr2	49965510	49966117	13.6436062882931	4.27982383383953	0.929399965750683	4.60493220524566	4.12600253016779e-06	0.000392936161099257	14	201	standard ATAC-Seq in frozen liver
peak_24374	chr13	8643098	8643761	13.5893169248439	3.83446897655757	0.832691449576585	4.6049097519944	4.12644772233338e-06	0.000392936161099257	20.5	214.5	standard ATAC-Seq in frozen liver
peak_58742	chr2	144102660	144103142	13.6391517986743	4.27953334773503	0.929377764148233	4.60472965119537	4.13002033940438e-06	0.000392936161099257	13.5	161	standard ATAC-Seq in frozen liver
peak_8180	chr10	21119795	21120602	13.8109370406891	3.51162967113511	0.764023700036311	4.59623133545232	4.30201053878975e-06	0.000406048283325363	33.5	257.5	standard ATAC-Seq in frozen liver
peak_20089	chr12	15804795	15805479	13.8174397308497	3.5105529275908	0.763826396484763	4.59600891478333	4.30660280835125e-06	0.000406123278414704	27	221.5	standard ATAC-Seq in frozen liver
peak_2869	chr1	89968703	89969697	15.578111983946	-3.71250674508116	0.807895299402965	-4.59528202209457	4.32164357952148e-06	0.000406768246514107	501	25	FFPE-ATAC in frozen liver
peak_93489	chr8	19751748	19752238	13.8153915303079	3.51192201457888	0.76425972742126	4.59519439344095	4.32346017635736e-06	0.000406768246514107	18.5	157.5	standard ATAC-Seq in frozen liver
peak_29926	chr14	22806863	22807785	13.8218942204685	3.51084243828215	0.76406214434294	4.59496974725966	4.32812057499447e-06	0.000406768246514107	41.5	302.5	standard ATAC-Seq in frozen liver
peak_11535	chr10	94055044	94055394	13.8064825510703	3.51133981076938	0.764205147954735	4.59476073953032	4.33246086815444e-06	0.000406768246514107	14.5	114.5	standard ATAC-Seq in frozen liver
peak_104351	chrX	4666227	4666429	13.8064825510703	3.51133981076938	0.764205147954735	4.59476073953032	4.33246086815444e-06	0.000406768246514107	7.5	64.5	standard ATAC-Seq in frozen liver
peak_36915	chr15	88670500	88670949	14.8018998298846	3.08576791924527	0.671791248063691	4.5933434353892	4.36200308063171e-06	0.000408723833201775	24	149.5	standard ATAC-Seq in frozen liver
peak_105115	chrX	47970201	47970538	14.8111587252278	5.01043603243418	1.09140579589896	4.5908094416039	4.41530318026393e-06	0.000411470773280296	5	124	standard ATAC-Seq in frozen liver
peak_95193	chr8	72573535	72574070	13.8020280614515	3.5110505106957	0.76480671581992	4.59076840993955	4.416171353952e-06	0.000411470773280296	18.5	172.5	standard ATAC-Seq in frozen liver
peak_106312	chrX	137082364	137082564	13.8020280614515	3.5110505106957	0.76480671581992	4.59076840993955	4.416171353952e-06	0.000411470773280296	8.5	63.5	standard ATAC-Seq in frozen liver
peak_39864	chr16	37851389	37851819	13.8085307516121	3.50996469637857	0.76460837166445	4.59053919163591	4.4210243082417e-06	0.000411470773280296	18	139.5	standard ATAC-Seq in frozen liver
peak_6059	chr1	173006411	173006667	13.6026803937003	3.83541780006487	0.83582736689347	4.58876791067516	4.45869811077895e-06	0.000413701187284353	10	83	standard ATAC-Seq in frozen liver
peak_98531	chr8_random	709753	710484	13.6136375734797	3.83453567888042	0.836441945640529	4.58434168547587	4.5541898959573e-06	0.000420973895020926	19.5	240	standard ATAC-Seq in frozen liver
peak_99711	chr9	42061826	42062127	15.8673849320967	-3.39022661443938	0.740043682657525	-4.58111689064753	4.62499232702838e-06	0.000426372460741455	152.5	11	FFPE-ATAC in frozen liver
peak_33711	chr15	7038599	7039348	13.3717932100823	4.24746889283815	0.93196536650622	4.55753941668582	5.17563795809907e-06	0.000465498357948828	12	246	standard ATAC-Seq in frozen liver
peak_77635	chr5	110503377	110503707	13.3697450095405	4.24897012248886	0.932490891279762	4.55658083336077	5.19930356203101e-06	0.000466449935922847	8	105.5	standard ATAC-Seq in frozen liver
peak_96725	chr8	107603402	107604002	15.369497248422	-3.69020739487205	0.809900888548936	-4.5563691150946	5.20454443627846e-06	0.000466528732163606	301	17.5	FFPE-ATAC in frozen liver
peak_83789	chr6	91922133	91922646	13.3130493570143	3.80116495245822	0.834629281149203	4.55431535690239	5.25564638399382e-06	0.000468751933826451	15	164.5	standard ATAC-Seq in frozen liver
peak_23024	chr12	101770000	101770357	13.3741994991593	4.24927515290155	0.933058924981939	4.55413376275652	5.26018788471177e-06	0.000468766026835994	9.5	116.5	standard ATAC-Seq in frozen liver
peak_97380	chr8	118060668	118061138	13.3085948673956	3.80086174371744	0.835019073378944	4.55182625749741	5.31822467139788e-06	0.000472756133112733	13.5	147.5	standard ATAC-Seq in frozen liver
peak_11201	chr10	87394773	87394973	15.3890053189038	-3.6914192380789	0.81114257885124	-4.55088825851896	5.34199140996497e-06	0.000474474434709505	98	6	FFPE-ATAC in frozen liver
peak_33668	chr15	6395981	6397105	15.6324013473952	-3.36865193301651	0.740670167012582	-4.54811342895532	5.41289605084012e-06	0.00047878386334226	567.5	37	FFPE-ATAC in frozen liver
peak_74740	chr5	32069114	32069874	14.0325571565343	3.24776428343335	0.714583234383623	4.54497688605131	5.49412827693489e-06	0.000484366515916851	34.5	246	standard ATAC-Seq in frozen liver
peak_74075	chr5	14957178	14957378	13.3896111685575	4.24865851658363	0.93499209799863	4.54405820720622	5.51814094078558e-06	0.000486082762822627	5.5	64.5	standard ATAC-Seq in frozen liver
peak_63647	chr3	88944170	88944911	16.1432944113911	-3.1283249759362	0.688537062958482	-4.54343730240827	5.53442717424647e-06	0.000487116137931476	371.5	32	FFPE-ATAC in frozen liver
peak_52894	chr1_random	1033572	1033993	14.0459206253907	3.24862709475839	0.715323726528024	4.54147817873495	5.58611686986592e-06	0.000489650616349666	21	137.5	standard ATAC-Seq in frozen liver
peak_98510	chr8_random	375508	376054	14.0459206253907	3.24862709475839	0.715323726528024	4.54147817873495	5.58611686986592e-06	0.000489650616349666	27	176	standard ATAC-Seq in frozen liver
peak_73687	chr4	154289323	154290256	16.1388399217723	-3.12879779072132	0.689231313038351	-4.53954678426983	5.63752712761828e-06	0.00049173859176213	470.5	39	FFPE-ATAC in frozen liver
peak_46094	chr18	4313771	4314314	14.0524233155513	3.2475880583963	0.716055233011696	4.53538764703539	5.74977803551267e-06	0.000501121037766658	27	174.5	standard ATAC-Seq in frozen liver
peak_89944	chr7	89919543	89920647	14.0236481772967	3.24718268120114	0.716270331958555	4.53345969575776	5.80253422722477e-06	0.000504896019304467	57.5	353.5	standard ATAC-Seq in frozen liver
peak_64308	chr3	98436056	98436608	15.3302614658358	-4.1288735681919	0.911211975874481	-4.53118887537608	5.8652669281253e-06	0.000509939658558367	277.5	11.5	FFPE-ATAC in frozen liver
peak_51055	chr19	32379338	32379753	13.5459847411741	3.48069673579553	0.768930801981304	4.52667096548456	5.99201255761853e-06	0.000518430283899003	17.5	134.5	standard ATAC-Seq in frozen liver
peak_74088	chr5	14990647	14991097	14.0548296046282	3.24921849733336	0.718035643134086	4.5251493131332	6.03528805559205e-06	0.000521330912259255	22	148	standard ATAC-Seq in frozen liver
peak_105117	chrX	47976024	47976614	14.2456182092475	4.95306133163577	1.09494271486472	4.523580333833	6.08022264910893e-06	0.000524365266026661	9.5	207.5	standard ATAC-Seq in frozen liver
peak_12012	chr10	107888978	107889409	15.143422642958	-3.66727138730451	0.81164493641853	-4.51831980063443	6.23322897317049e-06	0.000533687168264115	212.5	14	FFPE-ATAC in frozen liver
peak_6751	chr1	186099649	186100394	13.0914292411692	4.21713452462111	0.935452811520609	4.5081210646703	6.54042547029706e-06	0.000554660237405311	19.5	234.5	standard ATAC-Seq in frozen liver
peak_99459	chr9	32713767	32714585	13.0914292411692	4.21713452462111	0.935452811520609	4.5081210646703	6.54042547029706e-06	0.000554660237405311	25	255	standard ATAC-Seq in frozen liver
peak_68233	chr4	49386245	49386445	13.5213060040032	3.47742694366434	0.771698027815289	4.50620167257534	6.59983644017772e-06	0.000557928781878391	7.5	63.5	standard ATAC-Seq in frozen liver
peak_51296	chr19	36807066	36807449	15.41078123155	-3.345218811518	0.742464018157497	-4.50556354208183	6.6197026048327e-06	0.000559166174453558	190.5	12.5	FFPE-ATAC in frozen liver
peak_11118	chr10	86455319	86455859	13.1068409105673	4.21650114349813	0.936312549449711	4.50330516874547	6.69047037440146e-06	0.000562571944352007	13	170.5	standard ATAC-Seq in frozen liver
peak_34733	chr15	41278248	41279222	13.1003382204067	4.21776248679961	0.936649015976082	4.50303413003032	6.69901205013916e-06	0.000562571944352007	26.5	307.5	standard ATAC-Seq in frozen liver
peak_58984	chr2	148356238	148356691	13.1003382204067	4.21776248679961	0.936649015976082	4.50303413003032	6.69901205013916e-06	0.000562571944352007	11.5	144.5	standard ATAC-Seq in frozen liver
peak_33564	chr15	3459155	3459486	15.9172198059271	-3.10576352044689	0.69011929135347	-4.5003285074901	6.78485245061894e-06	0.000568179589832998	163.5	16	FFPE-ATAC in frozen liver
peak_70617	chr4	107782845	107783199	15.9172198059271	-3.10576352044689	0.69011929135347	-4.5003285074901	6.78485245061894e-06	0.000568179589832998	177	15	FFPE-ATAC in frozen liver
peak_50579	chr19	21988250	21989032	13.0391880782618	3.76889379832879	0.838079262547184	4.4970612766076	6.88991361489847e-06	0.000574727357303921	25	242	standard ATAC-Seq in frozen liver
peak_59864	chr2	163568999	163569492	13.0436425678805	3.76920495620128	0.838320272657595	4.4961395771241	6.91983208856017e-06	0.000576773128385453	16.5	154.5	standard ATAC-Seq in frozen liver
peak_1761	chr1	61430372	61431412	13.0480970574993	3.7695182215374	0.838999679103013	4.49287206589572	7.02690018634933e-06	0.000583423663841623	35.5	323.5	standard ATAC-Seq in frozen liver
peak_62501	chr3	58942873	58943407	13.0480970574993	3.7695182215374	0.838999679103013	4.49287206589572	7.02690018634933e-06	0.000583423663841623	16.5	167.5	standard ATAC-Seq in frozen liver
peak_94568	chr8	47623452	47623704	15.9086689152247	-3.10449148732164	0.691050009013948	-4.49242666496945	7.04161698724162e-06	0.000584191993016782	125.5	11	FFPE-ATAC in frozen liver
peak_69770	chr4	93510968	93511321	13.0302790990242	3.76826950377279	0.838905905411814	4.49188577582246	7.05952851939671e-06	0.000584770658664419	10	109.5	standard ATAC-Seq in frozen liver
peak_42066	chr17	10233755	10234278	13.0282308984824	3.76980365916123	0.83960052682413	4.48999677670627	7.12242513790858e-06	0.000589054463664828	17	163	standard ATAC-Seq in frozen liver
peak_92985	chr8	3736855	3737578	13.9762114201137	4.9243256124913	1.09704340164889	4.48872451635904	7.1650883117713e-06	0.000591224829454098	12.5	251	standard ATAC-Seq in frozen liver
peak_76961	chr5	97340587	97341374	13.7676048570193	3.21678417359353	0.718469219510935	4.47727485915571	7.5601888295326e-06	0.000619049795743787	37	253.5	standard ATAC-Seq in frozen liver
peak_15107	chr11	54694436	54694936	14.2565835614564	3.02614136517499	0.676673876337756	4.47208244768197	7.74615490684883e-06	0.000629457492084732	28	162	standard ATAC-Seq in frozen liver
peak_53874	chr2	26330409	26330975	14.2565835614564	3.02614136517499	0.676673876337756	4.47208244768197	7.74615490684883e-06	0.000629457492084732	31	183.5	standard ATAC-Seq in frozen liver
peak_58292	chr2	131030235	131030803	13.7720593466381	3.21708277697461	0.719414596784234	4.47180637056142	7.75616406847811e-06	0.000629792277387229	29	180.5	standard ATAC-Seq in frozen liver
peak_95948	chr8	87334758	87335194	14.2610380510752	3.02642635107125	0.676929053141652	4.47081763890248	7.79211202165571e-06	0.000631196872250834	23.5	141	standard ATAC-Seq in frozen liver
peak_41855	chr17	5566072	5566495	13.7607440783235	3.21482975029467	0.719151917793155	4.47030685833383	7.81074514469957e-06	0.000631196872250834	21	133.5	standard ATAC-Seq in frozen liver
peak_41584	chr16	96082709	96083574	14.2675407412358	3.0254476177971	0.676804177169462	4.47019643178055	7.81477906900293e-06	0.000631196872250834	42.5	281	standard ATAC-Seq in frozen liver
peak_84932	chr6	119361619	119361994	14.8651068745866	-4.0825654263264	0.913634017389217	-4.46849104633019	7.87733092643231e-06	0.000633855449166098	183.5	9.5	FFPE-ATAC in frozen liver
peak_36686	chr15	84066089	84066452	13.7655566564775	3.21816274451721	0.720524220699249	4.46641854925304	7.95399250187657e-06	0.000638103529000884	18	114.5	standard ATAC-Seq in frozen liver
peak_73133	chr4	146797849	146798082	14.0029383578264	4.92607419933726	1.10303830744936	4.46591398147196	7.97276411439266e-06	0.000638163559763196	4	82	standard ATAC-Seq in frozen liver
peak_5366	chr1	159380122	159380643	13.2676689728027	3.44815398030039	0.772116910504162	4.46584439919712	7.9753561287613e-06	0.000638163559763196	19.5	162	standard ATAC-Seq in frozen liver
peak_52884	chr1_random	872822	873079	13.2676689728027	3.44815398030039	0.772116910504162	4.46584439919712	7.9753561287613e-06	0.000638163559763196	9.5	78.5	standard ATAC-Seq in frozen liver
peak_24025	chr12	116859609	116859890	14.2476745822189	3.02557589080706	0.677505707172831	4.46575705381511	7.97861097825296e-06	0.000638163559763196	14.5	90	standard ATAC-Seq in frozen liver
peak_79184	chr5	136156739	136157510	15.1867548266278	-3.3228436885509	0.744309585535155	-4.46433010285873	8.03196523177889e-06	0.000641255995171726	373.5	27	FFPE-ATAC in frozen liver
peak_54659	chr2	34957490	34958032	15.1912093162466	-3.32232635607352	0.744208359153597	-4.46424219132941	8.03526340745764e-06	0.000641255995171726	261.5	20	FFPE-ATAC in frozen liver
peak_78588	chr5	123847722	123848207	13.7765138362569	3.21738641431357	0.720834538379442	4.46341877783325	8.06621831850711e-06	0.000642767005039368	25.5	154.5	standard ATAC-Seq in frozen liver
peak_68754	chr4	60512166	60512504	14.8692032756703	-4.08454744517764	0.915678268570861	-4.46067967906737	8.17001275873262e-06	0.000649210646117432	164	8	FFPE-ATAC in frozen liver
peak_6753	chr1	186113561	186114283	12.8131134727978	4.18457984127949	0.938664773110003	4.45801308534788	8.27228534058825e-06	0.000655767177195824	15.5	227.5	standard ATAC-Seq in frozen liver
peak_53182	chr2	6399317	6400424	12.8131134727978	4.18457984127949	0.938664773110003	4.45801308534788	8.27228534058825e-06	0.000655767177195824	28.5	344.5	standard ATAC-Seq in frozen liver
peak_21623	chr12	73036306	73036759	15.6911452004632	-3.08284330041031	0.691870295943241	-4.45581103638422	8.35766251030778e-06	0.000661554456839233	224.5	20	FFPE-ATAC in frozen liver
peak_50193	chr19	11044973	11045398	12.828525142196	4.18392288392323	0.939170764255067	4.45491176169846	8.39277056200234e-06	0.00066335143468586	9.5	132.5	standard ATAC-Seq in frozen liver
peak_105104	chrX	47930126	47930457	12.828525142196	4.18392288392323	0.939170764255067	4.45491176169846	8.39277056200234e-06	0.00066335143468586	8.5	103	standard ATAC-Seq in frozen liver
peak_54939	chr2	41751532	41751946	12.8220224520354	4.18522027068786	0.939515728778877	4.45465694983898	8.40274412224725e-06	0.00066364922724446	9	129.5	standard ATAC-Seq in frozen liver
peak_45102	chr17	73228106	73228795	12.8042044935602	4.18395228394044	0.939432237895855	4.45370311467241	8.44017873068338e-06	0.000665132110007775	12.5	213.5	standard ATAC-Seq in frozen liver
peak_87860	chr7	29607414	29607738	15.710653270945	-3.08405121442802	0.6928899002694	-4.45099750079908	8.54723366870084e-06	0.000672082809777352	159.5	14	FFPE-ATAC in frozen liver
peak_98546	chr8_random	785390	785609	13.6889866725047	4.89386513656172	1.09982894421519	4.44966025153472	8.60062357832718e-06	0.00067429771616036	3.5	73	standard ATAC-Seq in frozen liver
peak_20231	chr12	19129019	19129260	9.40037326996364	6.84082113290068	1.53921448569486	4.44435859750402	8.81544640722637e-06	0.000688113155724365	0.5	57.5	standard ATAC-Seq in frozen liver
peak_66068	chr3	138040450	138041062	14.6933216325719	-3.62125781426948	0.814832624695947	-4.44417381498531	8.82302549204503e-06	0.000688202423846683	293.5	17.5	FFPE-ATAC in frozen liver
peak_14354	chr11	34495184	34495800	12.8374341214335	4.18455358012132	0.94167716981464	4.44372414905738	8.84149512149204e-06	0.00068914041311752	12.5	193	standard ATAC-Seq in frozen liver
peak_87002	chr7	12595678	12596258	20.9418018961175	6.53902109418011	1.472342398472	4.44123669940248	8.94433424158627e-06	0.000694120580160373	6	308	standard ATAC-Seq in frozen liver
peak_92174	chr7	139470126	139470891	12.7653267995092	3.73588605534896	0.841815775833584	4.43789028739644	9.08449004120129e-06	0.000700759683620815	25.5	232.5	standard ATAC-Seq in frozen liver
peak_80094	chr5	148563233	148563717	12.7608723098904	3.73556612359607	0.841792763489774	4.43763154735346	9.0954136551276e-06	0.000700759683620815	13	144.5	standard ATAC-Seq in frozen liver
peak_84714	chr6	115830752	115831284	12.7608723098904	3.73556612359607	0.841792763489774	4.43763154735346	9.0954136551276e-06	0.000700759683620815	15	158.5	standard ATAC-Seq in frozen liver
peak_92547	chr7	147905941	147906310	14.6847707418694	-3.61983590108127	0.816104483838768	-4.43550546868018	9.18564996959982e-06	0.000706693684963334	175	12	FFPE-ATAC in frozen liver
peak_98060	chr8	126184804	126185055	14.6390322691226	-4.05926019854882	0.915428294175736	-4.43427434390569	9.23829249949243e-06	0.000710232754567376	121	7	FFPE-ATAC in frozen liver
peak_13102	chr10	128394160	128394440	14.6280750893433	-4.05941102176568	0.915875819703759	-4.432272295472	9.32451550526678e-06	0.000715318768735814	134.5	7	FFPE-ATAC in frozen liver
peak_101255	chr9	65722307	65722517	12.7742357787468	3.73653139229628	0.843248241621825	4.43111673154489	9.37463201980563e-06	0.000718647866355552	6.5	64	standard ATAC-Seq in frozen liver
peak_61906	chr3	37667997	37668813	12.7786902683655	3.73686107280145	0.844677323031289	4.42401017632508	9.6885453442488e-06	0.000735391844322618	26.5	250.5	standard ATAC-Seq in frozen liver
peak_92159	chr7	138593844	138594386	14.9781400911038	-3.29948549600488	0.746182248625497	-4.42182255351516	9.78718208342646e-06	0.000741765744025189	260.5	19.5	FFPE-ATAC in frozen liver
peak_66069	chr3	138042226	138042542	14.9846427812644	-3.29990649401714	0.746520759381565	-4.42038141946763	9.85268402335317e-06	0.000746201258338077	151.5	12	FFPE-ATAC in frozen liver
peak_58176	chr2	129209522	129210083	13.4195798833709	4.8639180957273	1.10176896574211	4.41464431016275	1.01176205086444e-05	0.000763024132280625	10.5	183	standard ATAC-Seq in frozen liver
peak_93518	chr8	19908522	19909540	12.7831447579843	3.7371982113321	0.846605617324696	4.41433193313999	1.01322395104783e-05	0.000763238157883565	34.5	315	standard ATAC-Seq in frozen liver
peak_58555	chr2	135518424	135519154	9.1086940327359	6.79619190647218	1.53974882184073	4.41383153542376	1.01556997852481e-05	0.000764278943937122	5	174	standard ATAC-Seq in frozen liver
peak_25864	chr13	41440659	41440994	13.4151253937522	4.86362368117341	1.10204780258732	4.4132601777844	1.01825503274835e-05	0.000765222592741222	4.5	109	standard ATAC-Seq in frozen liver
peak_104281	chrUn_random	5483855	5484330	13.4329433522273	4.86480377672445	1.10271940891095	4.41164246989084	1.025894157616e-05	0.000769881370675774	7	158	standard ATAC-Seq in frozen liver
peak_71069	chr4	117652762	117653082	15.4715732851598	-3.05996002667217	0.69373485664147	-4.4108494727887	1.02965880189021e-05	0.000772024721736076	154	14	FFPE-ATAC in frozen liver
peak_19357	chr11	118300259	118300962	13.4892890886479	3.18422187390553	0.721925138136209	4.41073693891062	1.03019410871373e-05	0.000772024721736076	32.5	217	standard ATAC-Seq in frozen liver
peak_76225	chr5	76329508	76330175	13.4803801094103	3.18361564899276	0.721869601859987	4.41023647593661	1.03257795708791e-05	0.000772579261320037	30	206	standard ATAC-Seq in frozen liver
peak_90679	chr7	108613920	108615147	13.4803801094103	3.18361564899276	0.721869601859987	4.41023647593661	1.03257795708791e-05	0.000772579261320037	56.5	377	standard ATAC-Seq in frozen liver
peak_73036	chr4	145029702	145030159	9.12205750159227	6.79756029488688	1.54140550941448	4.40997534611707	1.03382388366169e-05	0.000772579261320037	3	107.5	standard ATAC-Seq in frozen liver
peak_9425	chr10	57701857	57702501	12.9869469153544	3.41304256581216	0.774819760105968	4.40495034012217	1.05808113964351e-05	0.000784131247348147	26	198	standard ATAC-Seq in frozen liver
peak_5541	chr1	163971068	163971312	12.543706683664	4.15192683109956	0.942606372287427	4.40473028102289	1.05915575837795e-05	0.000784384055714541	6.5	74.5	standard ATAC-Seq in frozen liver
peak_103915	chr9	121973993	121974667	12.5303432148076	4.15094986521163	0.942544347430576	4.4039836178821	1.06280972500864e-05	0.000786001446630008	21	202.5	standard ATAC-Seq in frozen liver
peak_42800	chr17	26225122	26225781	14.4672470271079	-3.59719028694725	0.816932986469039	-4.40328686260434	1.06623031066843e-05	0.00078744201099842	306.5	21	FFPE-ATAC in frozen liver
peak_8676	chr10	33917804	33918357	12.9958558945919	3.41367265221754	0.775357802143434	4.40270626384441	1.06908867525801e-05	0.000789008101058771	24	169	standard ATAC-Seq in frozen liver
peak_70870	chr4	115218783	115219385	12.5546638634434	4.15091257554369	0.94312966436571	4.40121091762641	1.0764841912626e-05	0.000791877445533866	16.5	184.5	standard ATAC-Seq in frozen liver
peak_16286	chr11	75282180	75282562	14.4692952276497	-3.59819700872645	0.817768506831011	-4.40001905022005	1.08241375361017e-05	0.000795548071459228	178	9.5	FFPE-ATAC in frozen liver
peak_87003	chr7	12597912	12598223	9.13096648082985	6.79851037144739	1.545265446109	4.3995744475916	1.08463363592282e-05	0.000796632118076586	1.5	72.5	standard ATAC-Seq in frozen liver
peak_91096	chr7	119282000	119282806	12.5526156629016	4.15260754377279	0.944810458429183	4.39517525099882	1.10683420777673e-05	0.000808495514654619	17	246	standard ATAC-Seq in frozen liver
peak_80319	chr5	152209731	152210039	14.7476109960211	-3.2759619547617	0.74830410659547	-4.37784842537644	1.19856656206556e-05	0.000860595601249761	142.5	11	FFPE-ATAC in frozen liver
peak_1369	chr1	54035198	54035730	12.4870110311378	3.70177785430886	0.845588270613912	4.37775449702171	1.19908307152876e-05	0.000860595601249761	18	160	standard ATAC-Seq in frozen liver
peak_2627	chr1	85245549	85245778	12.5680273322998	4.15189840220605	0.948494919832763	4.37735439103681	1.20128562415745e-05	0.000861223262589951	6	70	standard ATAC-Seq in frozen liver
peak_65752	chr3	131004570	131004892	14.7411083058605	-3.27553336386749	0.748380335144001	-4.37682981506619	1.2041792249151e-05	0.000862516558159382	150.5	12.5	FFPE-ATAC in frozen liver
peak_57660	chr2	119152894	119153264	12.482556541519	3.70144817148682	0.845807721837526	4.3762288708424	1.20750225381477e-05	0.000862585728261174	11	107.5	standard ATAC-Seq in frozen liver
peak_106128	chrX	125590956	125591336	12.482556541519	3.70144817148682	0.845807721837526	4.3762288708424	1.20750225381477e-05	0.000862585728261174	10.5	112	standard ATAC-Seq in frozen liver
peak_18364	chr11	104479757	104480469	13.1501730942372	4.83333976826324	1.10449517361587	4.37606237104685	1.20842449148481e-05	0.000862668268991282	11	230	standard ATAC-Seq in frozen liver
peak_66547	chr3	150961304	150961736	13.1412641149996	4.83273575977538	1.10445941973213	4.37565715266159	1.21067179435863e-05	0.000863696004115524	6	141.5	standard ATAC-Seq in frozen liver
peak_64995	chr3	115471598	115472098	13.1546275838559	4.83364380400715	1.10498438099298	4.37440011565001	1.21766860837841e-05	0.000866952485428621	8.5	164.5	standard ATAC-Seq in frozen liver
peak_104100	chrUn_random	2382650	2382964	12.4959200103754	3.70243952234226	0.84660683895606	4.37326909254323	1.22399698113107e-05	0.00086916911598018	11	93	standard ATAC-Seq in frozen liver
peak_38735	chr16	21637343	21637782	12.4805083409772	3.70308128200654	0.84706680854022	4.37165196968134	1.23309975417826e-05	0.000872709825361142	14.5	130	standard ATAC-Seq in frozen liver
peak_35312	chr15	59616881	59617228	15.2389959895352	-3.03587790826802	0.695918368823757	-4.3624051961716	1.28640335304937e-05	0.000905044001129911	166.5	13.5	FFPE-ATAC in frozen liver
peak_91684	chr7	130338252	130338477	15.2650067501776	-3.03754601236045	0.696774940263432	-4.35943636436184	1.30397864850649e-05	0.000914401132410728	106	9	FFPE-ATAC in frozen liver
peak_36971	chr15	89308398	89308598	15.2694612397964	-3.03703837068436	0.697410636002709	-4.35473480601258	1.33228106799513e-05	0.000927564051839843	94	9	FFPE-ATAC in frozen liver
peak_99447	chr9	32568220	32568736	12.2674391158344	4.11613505234366	0.945319161127068	4.35422788578214	1.33536738596404e-05	0.000929101189899857	12	152	standard ATAC-Seq in frozen liver
peak_105629	chrX	86308952	86309175	12.2718936054532	4.1164677541079	0.945564062323342	4.35345199561978	1.34010450492105e-05	0.000931790868997085	3.5	66	standard ATAC-Seq in frozen liver
peak_104350	chrX	4664863	4665071	12.2629846262156	4.11579889488764	0.945522796959313	4.35293459673691	1.34327233617664e-05	0.000932469238592356	5.5	61	standard ATAC-Seq in frozen liver
peak_8636	chr10	33506134	33506748	12.256481936055	4.11717658540623	0.945885205354637	4.35272331367377	1.34456799288325e-05	0.000932469238592356	15.5	182.5	standard ATAC-Seq in frozen liver
peak_98564	chr8_random	848364	848617	12.256481936055	4.11717658540623	0.945885205354637	4.35272331367377	1.34456799288325e-05	0.000932469238592356	6.5	75	standard ATAC-Seq in frozen liver
peak_17003	chr11	85305570	85306240	12.276348095072	4.11679921192519	0.946260741265196	4.35059707372075	1.35767332802354e-05	0.000940015272602447	17	201.5	standard ATAC-Seq in frozen liver
peak_82194	chr6	52035964	52036924	12.2698454049114	4.1181887422418	0.946625497794926	4.35038856637047	1.3589650281407e-05	0.000940015272602447	21	287	standard ATAC-Seq in frozen liver
peak_93517	chr8	19906562	19907277	12.2698454049114	4.1181887422418	0.946625497794926	4.35038856637047	1.3589650281407e-05	0.000940015272602447	16	212.5	standard ATAC-Seq in frozen liver
peak_11548	chr10	94272632	94273191	12.2742998945302	4.1185392399321	0.947787188414209	4.34542615713454	1.39005528935265e-05	0.000959658635171613	13.5	168	standard ATAC-Seq in frozen liver
peak_14177	chr11	30061037	30061580	13.2109733202765	3.15090652270204	0.72565932425524	4.34212917464526	1.41108524020955e-05	0.000971042757418077	27	165	standard ATAC-Seq in frozen liver
peak_81552	chr6	37375813	37376246	13.2109733202765	3.15090652270204	0.72565932425524	4.34212917464526	1.41108524020955e-05	0.000971042757418077	21	130.5	standard ATAC-Seq in frozen liver
peak_87246	chr7	17643487	17644294	13.2109733202765	3.15090652270204	0.72565932425524	4.34212917464526	1.41108524020955e-05	0.000971042757418077	37.5	241.5	standard ATAC-Seq in frozen liver
peak_55250	chr2	52853551	52853856	12.7065829464412	3.38045212330313	0.779021881524041	4.33935452068403	1.42901830102837e-05	0.000978973658511677	12.5	90	standard ATAC-Seq in frozen liver
peak_73131	chr4	146790547	146790800	12.7130856366018	3.37923341940488	0.778804586788115	4.33900040745939	1.43132257373882e-05	0.000979924485999077	8.5	75.5	standard ATAC-Seq in frozen liver
peak_96217	chr8	92039572	92040856	13.2020643410389	3.1502823005219	0.726108217225074	4.3385851114055	1.43402948791454e-05	0.000980964202700397	53.5	386.5	standard ATAC-Seq in frozen liver
peak_29937	chr14	23089021	23089495	8.56097147523073	6.70646180610771	1.54582425395843	4.33843743163837	1.4349932459821e-05	0.000980964202700397	2.5	104.5	standard ATAC-Seq in frozen liver
peak_1149	chr1	44257951	44258164	12.71103743606	3.38077949101458	0.779303741445087	4.33820513262967	1.43651047927213e-05	0.000980964202700397	9.5	63	standard ATAC-Seq in frozen liver
peak_88862	chr7	59145831	59146051	15.0303894264408	-4.71192406198021	1.08623067326258	-4.33786688036304	1.43872246955235e-05	0.000981847748381997	111.5	4	FFPE-ATAC in frozen liver
peak_73089	chr4	146131285	146131485	8.56988045446831	6.70743678970795	1.54766375651912	4.33391087789882	1.46483495500757e-05	0.000993105035030724	0.5	43.5	standard ATAC-Seq in frozen liver
peak_55241	chr2	52777151	52777542	12.7219946158394	3.37988081744654	0.779884726443948	4.33382101590556	1.46543332673625e-05	0.000993105035030724	14	117.5	standard ATAC-Seq in frozen liver
peak_75464	chr5	52867507	52868013	12.7219946158394	3.37988081744654	0.779884726443948	4.33382101590556	1.46543332673625e-05	0.000993105035030724	21.5	149.5	standard ATAC-Seq in frozen liver
peak_82198	chr6	52120588	52121177	12.7219946158394	3.37988081744654	0.779884726443948	4.33382101590556	1.46543332673625e-05	0.000993105035030724	26	174.5	standard ATAC-Seq in frozen liver
peak_44995	chr17	71095847	71096474	13.2219305000559	3.15008779307583	0.727036193890011	4.33277988021651	1.47238304175829e-05	0.000997182837888471	28	190	standard ATAC-Seq in frozen liver
peak_36293	chr15	79563093	79563337	14.5280390807177	-3.25193964478803	0.750571541573851	-4.33261783143167	1.47346756078572e-05	0.000997285743562428	112	9.5	FFPE-ATAC in frozen liver
peak_86039	chr6	137093538	137094664	13.1976098514202	3.14996641071677	0.727069636539204	4.33241364019872	1.47483520476305e-05	0.000997580025061071	46	338.5	standard ATAC-Seq in frozen liver
peak_25620	chr13	37756057	37756378	13.9823647237543	-3.98940277731535	0.92169176884724	-4.32834805751265	1.50231921158021e-05	0.0010116908952593	146.5	6.5	FFPE-ATAC in frozen liver
peak_79075	chr5	135031375	135031786	13.2133796093535	3.15268188126781	0.72843493958082	4.32802122737554	1.50454971730077e-05	0.00101194526522394	19.5	124.5	standard ATAC-Seq in frozen liver
peak_58142	chr2	128579058	128579542	12.7199464152975	3.38145227108767	0.781431570148991	4.32725321097911	1.50980360544337e-05	0.00101417643066902	16.5	142	standard ATAC-Seq in frozen liver
peak_6537	chr1	182335804	182336008	12.4537814032645	3.70113202894202	0.856222400109549	4.3226292940578	1.54180673288294e-05	0.00102536859581946	7	60	standard ATAC-Seq in frozen liver
peak_64097	chr3	96302692	96302997	14.5064828096941	-3.24962348225132	0.751975160094506	-4.32145056738698	1.55006781278539e-05	0.00103022188832478	142.5	11	FFPE-ATAC in frozen liver
peak_4081	chr1	133515659	133516660	15.0259267643924	-3.01265465973319	0.69779015103506	-4.31742215802903	1.57862053851895e-05	0.00104621373813352	473	40	FFPE-ATAC in frozen liver
peak_37591	chr15	100511354	100511918	15.0259267643924	-3.01265465973319	0.69779015103506	-4.31742215802903	1.57862053851895e-05	0.00104621373813352	264	23.5	FFPE-ATAC in frozen liver
peak_61202	chr3	14857860	14858157	14.0325576861199	-3.54811615239362	0.821951541751802	-4.31669748417482	1.5838098351658e-05	0.00104621373813352	135	9	FFPE-ATAC in frozen liver
peak_37905	chr16	4369115	4369787	15.032429454553	-3.01307842088787	0.698007469368431	-4.31668506873452	1.58389888206674e-05	0.00104621373813352	313	25.5	FFPE-ATAC in frozen liver
peak_89038	chr7	71897782	71898107	15.032429454553	-3.01307842088787	0.698007469368431	-4.31668506873452	1.58389888206674e-05	0.00104621373813352	152.5	15	FFPE-ATAC in frozen liver
peak_21610	chr12	72978014	72978338	15.0194240742318	-3.01223145999867	0.697866670411696	-4.31634234404926	1.58635888142452e-05	0.00104621373813352	152	13.5	FFPE-ATAC in frozen liver
peak_13115	chr10	129172391	129172730	12.2131497523852	3.66718114062836	0.84967082400431	4.31600219405646	1.58880400109299e-05	0.00104621373813352	11.5	99	standard ATAC-Seq in frozen liver
peak_21729	chr12	74684483	74685978	12.2131497523852	3.66718114062836	0.84967082400431	4.31600219405646	1.58880400109299e-05	0.00104621373813352	51	423.5	standard ATAC-Seq in frozen liver
peak_37420	chr15	98946880	98947441	12.2131497523852	3.66718114062836	0.84967082400431	4.31600219405646	1.58880400109299e-05	0.00104621373813352	17	164.5	standard ATAC-Seq in frozen liver
peak_52366	chr19	53511720	53512521	12.2131497523852	3.66718114062836	0.84967082400431	4.31600219405646	1.58880400109299e-05	0.00104621373813352	19.5	234	standard ATAC-Seq in frozen liver
peak_71708	chr4	129249524	129250249	12.2131497523852	3.66718114062836	0.84967082400431	4.31600219405646	1.58880400109299e-05	0.00104621373813352	21.5	209	standard ATAC-Seq in frozen liver
peak_76228	chr5	76357788	76358753	12.2131497523852	3.66718114062836	0.84967082400431	4.31600219405646	1.58880400109299e-05	0.00104621373813352	29	279	standard ATAC-Seq in frozen liver
peak_77487	chr5	107540780	107541275	12.217604242004	3.66752163896289	0.850206712117765	4.31368229242453	1.60557634033523e-05	0.0010559577383709	16	142.5	standard ATAC-Seq in frozen liver
peak_13978	chr11	22399374	22399664	15.0368839441718	-3.01256358713341	0.698656118771442	-4.31194046139734	1.61828015385181e-05	0.00105975052892075	135	12	FFPE-ATAC in frozen liver
peak_57866	chr2	122507077	122508101	12.2220587316228	3.66786566671263	0.851263070655835	4.3087334493282	1.64192107116664e-05	0.0010710964254619	34.5	292.5	standard ATAC-Seq in frozen liver
peak_104196	chrUn_random	4076908	4077230	12.2220587316228	3.66786566671263	0.851263070655835	4.3087334493282	1.64192107116664e-05	0.0010710964254619	9.5	95	standard ATAC-Seq in frozen liver
peak_7400	chr10	3074966	3075379	11.9935778370818	4.08151654960084	0.949109092208043	4.30036608342404	1.70516189442363e-05	0.00110648245041122	10	120.5	standard ATAC-Seq in frozen liver
peak_20840	chr12	40647038	40647592	11.9891233474631	4.08117234618699	0.949088137495028	4.30009836279127	1.70722316859427e-05	0.00110714820149365	15	159.5	standard ATAC-Seq in frozen liver
peak_7515	chr10	6238490	6238983	11.9826206573024	4.08259564514436	0.949459503458053	4.29991551011394	1.70863237937493e-05	0.00110739053344228	11.5	145	standard ATAC-Seq in frozen liver
peak_46861	chr18	24259898	24260602	11.9980323267006	4.08185826432584	0.949605230392799	4.29847912972994	1.71974090784985e-05	0.00111280175399727	13.5	205.5	standard ATAC-Seq in frozen liver
peak_72552	chr4	138284792	138285494	11.99152963654	4.08328982587501	0.949978223963228	4.29829834292398	1.72114392421052e-05	0.00111280175399727	15	202	standard ATAC-Seq in frozen liver
peak_24324	chr13	5591347	5592202	11.9959841261588	4.08364661837991	0.95095945321908	4.29423841842721	1.7529402098579e-05	0.00113130762282434	19.5	251	standard ATAC-Seq in frozen liver
peak_68799	chr4	60733365	60733870	13.7607446079092	-3.96389900715404	0.923469894511171	-4.29239656941095	1.76754893542555e-05	0.00113790794756919	227.5	10.5	FFPE-ATAC in frozen liver
peak_29973	chr14	25612789	25613398	12.580178088638	4.76794040916477	1.11143039879091	4.28991362333769	1.78742623474538e-05	0.00114871138291729	6	185.5	standard ATAC-Seq in frozen liver
peak_104112	chrUn_random	2436576	2437089	12.0069413059382	4.08254345319155	0.952057651977875	4.28812629645922	1.80186636941078e-05	0.00115383106394263	10.5	150	standard ATAC-Seq in frozen liver
peak_3623	chr1	121317489	121317971	12.6113595159696	4.77020573548214	1.11280670089996	4.28664361171111	1.81392951874002e-05	0.00115808841077336	6	148.5	standard ATAC-Seq in frozen liver
peak_22645	chr12	87819323	87819705	12.6113595159696	4.77020573548214	1.11280670089996	4.28664361171111	1.81392951874002e-05	0.00115808841077336	6	118	standard ATAC-Seq in frozen liver
peak_96400	chr8	95749952	95750447	14.3084671654143	-3.22751278643946	0.753033668855387	-4.2860139193315	1.81907594936108e-05	0.00115869148279158	226.5	17	FFPE-ATAC in frozen liver
peak_70318	chr4	104439574	104440241	14.2999162747119	-3.22605561862994	0.752794734058409	-4.28543860985568	1.82379006992629e-05	0.00115869148279158	303	23.5	FFPE-ATAC in frozen liver
peak_29925	chr14	22805183	22805576	12.4327216676886	3.3458734464398	0.783324735779182	4.27137468487016	1.94271684992327e-05	0.00121325723333678	18	113.5	standard ATAC-Seq in frozen liver
peak_31752	chr14	63175157	63175709	12.4327216676886	3.3458734464398	0.783324735779182	4.27137468487016	1.94271684992327e-05	0.00121325723333678	23	157.5	standard ATAC-Seq in frozen liver
peak_5782	chr1	167647777	167648553	12.9326575519052	3.11680220022635	0.729709778627319	4.27129016427527	1.94345340867775e-05	0.00121325723333678	36.5	229.5	standard ATAC-Seq in frozen liver
peak_38161	chr16	10689837	10690977	12.9326575519052	3.11680220022635	0.729709778627319	4.27129016427527	1.94345340867775e-05	0.00121325723333678	49.5	335.5	standard ATAC-Seq in frozen liver
peak_46440	chr18	11952621	11953269	12.4371761573074	3.34621311854356	0.783892976190079	4.26871169940444	1.96605180891388e-05	0.00122308094469716	25.5	188	standard ATAC-Seq in frozen liver
peak_73042	chr4	145147777	145148059	12.0093475950152	4.08478394900303	0.956973693506486	4.26843911877641	1.96845535534944e-05	0.00122316505756103	7	83	standard ATAC-Seq in frozen liver
peak_93769	chr8	26353594	26354006	12.443678847468	3.34494726667209	0.783670669738831	4.26830733347063	1.96961840780266e-05	0.00122316505756103	17	121	standard ATAC-Seq in frozen liver
peak_68478	chr4	56126275	56127159	12.9415665311427	3.11744643069563	0.730825305052795	4.26565200895777	1.99319249914389e-05	0.00123279359552313	38.5	263	standard ATAC-Seq in frozen liver
peak_89024	chr7	71628426	71628736	12.9237485726676	3.11615786746779	0.730718909751329	4.26450968475449	2.00341654817832e-05	0.00123483205905269	16.5	90.5	standard ATAC-Seq in frozen liver
peak_104113	chrUn_random	2438458	2438658	12.9237485726676	3.11615786746779	0.730718909751329	4.26450968475449	2.00341654817832e-05	0.00123483205905269	9	59.5	standard ATAC-Seq in frozen liver
peak_72907	chr4	141644765	141645097	12.9436147316845	3.1159594084589	0.730897475455604	4.26319629372994	2.01523339903191e-05	0.00123944911582922	15	97	standard ATAC-Seq in frozen liver
peak_41139	chr16	88848759	88849145	12.4416306469262	3.34655948048659	0.785012711580199	4.2630640639565	2.01642676815435e-05	0.00123944911582922	15.5	113.5	standard ATAC-Seq in frozen liver
peak_15514	chr11	61347042	61347508	12.4481333370868	3.34528076216063	0.784789218301671	4.26264872674985	2.02017954992129e-05	0.00123944911582922	17	138	standard ATAC-Seq in frozen liver
peak_73132	chr4	146791346	146791589	12.4193581988322	3.34487062545762	0.784888053086535	4.26158942323568	2.0297810278762e-05	0.00124405468443185	8.5	68.5	standard ATAC-Seq in frozen liver
peak_70411	chr4	104978548	104978970	12.9350638409821	3.11862197250434	0.732082377673866	4.25993312721652	2.04488075309775e-05	0.00125101546256019	22	125	standard ATAC-Seq in frozen liver
peak_36288	chr15	79519807	79520040	14.3542138105907	-4.64407786130898	1.09042949385827	-4.25894373498357	2.05395157163649e-05	0.00125584635288299	112.5	3.5	FFPE-ATAC in frozen liver
peak_86969	chr7	6836077	6836836	12.315225789123	4.73557519535225	1.11292934413071	4.25505466301737	2.08997949809129e-05	0.00126661096481573	14.5	226.5	standard ATAC-Seq in frozen liver
peak_1403	chr1	54747364	54747926	11.9392884736326	3.63173651762526	0.85405012323079	4.2523692917305	2.11520676565207e-05	0.00127516244263247	18	160	standard ATAC-Seq in frozen liver
peak_3605	chr1	121130895	121131502	11.9392884736326	3.63173651762526	0.85405012323079	4.2523692917305	2.11520676565207e-05	0.00127516244263247	18.5	171.5	standard ATAC-Seq in frozen liver
peak_52343	chr19	53273230	53274043	11.9392884736326	3.63173651762526	0.85405012323079	4.2523692917305	2.11520676565207e-05	0.00127516244263247	27	231.5	standard ATAC-Seq in frozen liver
peak_98509	chr8_random	374817	375334	11.9392884736326	3.63173651762526	0.85405012323079	4.2523692917305	2.11520676565207e-05	0.00127516244263247	14.5	146.5	standard ATAC-Seq in frozen liver
peak_41031	chr16	86454390	86454729	8.01770340734435	6.61130603617388	1.55475879799763	4.25230334421556	2.11582993059043e-05	0.00127516244263247	1.5	71	standard ATAC-Seq in frozen liver
peak_18935	chr11	113668316	113668822	11.9303794943951	3.63103662164285	0.854003346688666	4.2517826607143	2.12075622248018e-05	0.00127516244263247	17	142	standard ATAC-Seq in frozen liver
peak_28979	chr13	113551971	113552468	11.9303794943951	3.63103662164285	0.854003346688666	4.2517826607143	2.12075622248018e-05	0.00127516244263247	14	140	standard ATAC-Seq in frozen liver
peak_30558	chr14	34500541	34501274	11.9303794943951	3.63103662164285	0.854003346688666	4.2517826607143	2.12075622248018e-05	0.00127516244263247	22.5	203.5	standard ATAC-Seq in frozen liver
peak_34734	chr15	41443627	41444184	11.9303794943951	3.63103662164285	0.854003346688666	4.2517826607143	2.12075622248018e-05	0.00127516244263247	14	156.5	standard ATAC-Seq in frozen liver
peak_41366	chr16	92632217	92632847	11.9303794943951	3.63103662164285	0.854003346688666	4.2517826607143	2.12075622248018e-05	0.00127516244263247	23.5	179	standard ATAC-Seq in frozen liver
peak_47445	chr18	39034457	39034671	12.3330437475982	4.73690491855186	1.11524003274828	4.24743084847729	2.16235875959579e-05	0.0012932990779001	3	65.5	standard ATAC-Seq in frozen liver
peak_98508	chr8_random	374138	374482	11.9259250047763	3.63068420542659	0.854795637158415	4.24742949963575	2.16237177389481e-05	0.0012932990779001	11.5	97	standard ATAC-Seq in frozen liver
peak_73046	chr4	145167603	145167836	8.02215789696315	6.61184225051139	1.55688245757988	4.2468474214741	2.16799491970156e-05	0.00129593744392378	0.5	49	standard ATAC-Seq in frozen liver
peak_55251	chr2	52856964	52857429	11.7152620687105	4.04569552479859	0.9528896770785	4.2457124073402	2.17899974207573e-05	0.00130076840684793	12	129	standard ATAC-Seq in frozen liver
peak_8729	chr10	37540139	37540471	11.7043048889311	4.04681401163828	0.953499781816304	4.24416878620525	2.19405167640147e-05	0.00130763199066389	9.5	93	standard ATAC-Seq in frozen liver
peak_9250	chr10	51994740	51995328	11.9481974528702	3.63244622618261	0.856285879652692	4.24209520733417	2.21442708321722e-05	0.00131633472958403	19.5	165	standard ATAC-Seq in frozen liver
peak_34056	chr15	25469378	25469927	11.7241710479481	4.04640015530481	0.953940286652961	4.24177510051725	2.217588520384e-05	0.00131748165989636	14	156.5	standard ATAC-Seq in frozen liver
peak_79084	chr5	135120495	135120961	11.6998503993123	4.04646204249961	0.954236654691232	4.24052253977704	2.23000039461237e-05	0.00132118566315486	13.5	132	standard ATAC-Seq in frozen liver
peak_11269	chr10	88986013	88986402	14.0758898697897	-3.20175328107241	0.755260232077801	-4.23927163788837	2.24246180075234e-05	0.00132493534438628	173	14	FFPE-ATAC in frozen liver
peak_27675	chr13	81476750	81477017	14.0758898697897	-3.20175328107241	0.755260232077801	-4.23927163788837	2.24246180075234e-05	0.00132493534438628	118	8	FFPE-ATAC in frozen liver
peak_26928	chr13	61037826	61038426	11.7221228474062	4.04826118563966	0.955622316381521	4.23625643336634	2.27277205830497e-05	0.00133396251999493	15	172	standard ATAC-Seq in frozen liver
peak_15055	chr11	53819836	53820255	13.5824566757338	-3.498090206816	0.826074840812647	-4.23459235651671	2.28966670298913e-05	0.00134036549079448	181.5	13	FFPE-ATAC in frozen liver
peak_8647	chr10	33585833	33586153	11.6953959096935	4.04610920051962	0.955491664603528	4.23458346148788	2.28975733063387e-05	0.00134036549079448	7.5	89	standard ATAC-Seq in frozen liver
peak_87082	chr7	15029109	15029674	13.5759539855732	-3.49761869443006	0.826173261045733	-4.23351718016501	2.30064598159548e-05	0.00134221920690583	243.5	15.5	FFPE-ATAC in frozen liver
peak_68805	chr4	60743933	60744176	13.5694512954126	-3.49714553532574	0.826582229595043	-4.23085013216296	2.32809751747642e-05	0.00135306750229027	108	6.5	FFPE-ATAC in frozen liver
peak_95136	chr8	71994449	71994666	11.7330800271856	4.04710846062725	0.95706529564816	4.22866493961251	2.35082141250295e-05	0.00136215541173976	4.5	60.5	standard ATAC-Seq in frozen liver
peak_24376	chr13	8644535	8644891	11.726577337025	4.04864497199802	0.957457878050468	4.22853586023198	2.35217029401835e-05	0.00136215541173976	8.5	101.5	standard ATAC-Seq in frozen liver
peak_17932	chr11	100385908	100386168	13.5564459150914	-3.49618572039589	0.828349524060831	-4.22066485081863	2.43582852612329e-05	0.00139657783190927	115.5	8	FFPE-ATAC in frozen liver
peak_98820	chr9	14938936	14940724	7.7304786597354	6.55937934080814	1.55627641805815	4.21479067901871	2.50009959441551e-05	0.00142895858111812	12.5	361.5	standard ATAC-Seq in frozen liver
peak_61625	chr3	29142401	29142925	7.73493314935419	6.55991379462165	1.55666378145935	4.21408519473088	2.50792613126104e-05	0.00143113720678188	3.5	103	standard ATAC-Seq in frozen liver
peak_46008	chr17	91789367	91789979	12.0413645103704	4.70179175323237	1.11601104118092	4.21303336592182	2.51963825300874e-05	0.00143552261661428	9	179.5	standard ATAC-Seq in frozen liver
peak_85485	chr6	125607590	125608347	12.0413645103704	4.70179175323237	1.11601104118092	4.21303336592182	2.51963825300874e-05	0.00143552261661428	13	228.5	standard ATAC-Seq in frozen liver
peak_41000	chr16	85541874	85542362	7.73938763897298	6.56045331993214	1.55778205437445	4.21140640406631	2.53785701902084e-05	0.00144206106140845	3	96	standard ATAC-Seq in frozen liver
peak_8728	chr10	37269272	37269743	7.74384212859177	6.56100264395477	1.55965819340124	4.20669264055016	2.59135197050312e-05	0.00146467541423696	3	93.5	standard ATAC-Seq in frozen liver
peak_84571	chr6	114456979	114457265	12.0437707994474	4.70397692419621	1.11855073969045	4.20542113762133	2.60596447404064e-05	0.00147137927607937	5.5	85	standard ATAC-Seq in frozen liver
peak_63044	chr3	79022431	79022631	12.1544058993172	3.31010075318825	0.787642759971372	4.20254069663328	2.63935778148273e-05	0.00148542935342807	9	56	standard ATAC-Seq in frozen liver
peak_105102	chrX	47922440	47922655	12.0591824688456	4.70316883408568	1.1192558387474	4.20204985425779	2.64508860510089e-05	0.00148718785668183	3.5	63.5	standard ATAC-Seq in frozen liver
peak_75705	chr5	64770145	64770581	12.158860388936	3.31044829678925	0.787954229625101	4.20132054924601	2.65362545416037e-05	0.00149120363868868	18.5	124	standard ATAC-Seq in frozen liver
peak_53900	chr2	26439221	26439575	12.1499514096984	3.30975644300305	0.787904218847444	4.20070912660502	2.66080262088516e-05	0.00149393128363266	13	100.5	standard ATAC-Seq in frozen liver
peak_27229	chr13	66811953	66812391	7.74829661821056	6.56156631325461	1.56233045997157	4.1998581486877	2.67082253171403e-05	0.00149850519789594	2.5	87	standard ATAC-Seq in frozen liver
peak_16301	chr11	75377575	75378135	12.6587962731526	3.08220065381722	0.734118345435149	4.1985065119034	2.68681128487759e-05	0.00150195981178005	26	159	standard ATAC-Seq in frozen liver
peak_18143	chr11	101911346	101911819	12.6587962731526	3.08220065381722	0.734118345435149	4.1985065119034	2.68681128487759e-05	0.00150195981178005	21.5	138.5	standard ATAC-Seq in frozen liver
peak_75443	chr5	52326161	52327194	12.6587962731526	3.08220065381722	0.734118345435149	4.1985065119034	2.68681128487759e-05	0.00150195981178005	55	295	standard ATAC-Seq in frozen liver
peak_89021	chr7	71620430	71620924	12.1698175687154	3.30948845537479	0.788616355533432	4.19657598039062	2.70980580189149e-05	0.00151165322195344	19	141	standard ATAC-Seq in frozen liver
peak_54238	chr2	30327377	30327942	12.1519996102402	3.30810118382424	0.788516296282579	4.19534916325778	2.72451550454163e-05	0.00151669424018833	23.5	158.5	standard ATAC-Seq in frozen liver
peak_44908	chr17	67057242	67057843	12.649887293915	3.08153879753441	0.73462526075767	4.19470846177574	2.73222775004017e-05	0.00152019616733375	26.5	174.5	standard ATAC-Seq in frozen liver
peak_70330	chr4	104512194	104513208	13.8607724441052	-3.17586352192522	0.757690160851588	-4.19150687974592	2.77107783629539e-05	0.00153781158658844	439	42.5	FFPE-ATAC in frozen liver
peak_13398	chr11	5806419	5806922	13.8498152643258	-3.17598800386301	0.757909714919234	-4.19045691240606	2.78393279084855e-05	0.00154174515132342	219	19.5	FFPE-ATAC in frozen liver
peak_89073	chr7	72617101	72617406	11.4414007899579	4.00932586673088	0.956927475687577	4.18979072980434	2.79211837135187e-05	0.00154467846101396	8	84.5	standard ATAC-Seq in frozen liver
peak_39582	chr16	33584030	33584585	12.6677052523902	3.08286706757371	0.735830174679682	4.18964480345716	2.79391446370313e-05	0.0015448728998653	23.5	158.5	standard ATAC-Seq in frozen liver
peak_64921	chr3	110381385	110381930	11.6609727052613	3.59503984655045	0.858162841151931	4.18922805108265	2.79904999027286e-05	0.00154691269720821	17	150	standard ATAC-Seq in frozen liver
peak_27193	chr13	66400947	66401237	11.6565182156425	3.59467942324319	0.858138701086107	4.18892589122663	2.80277903525181e-05	0.00154737422432005	9.5	79	standard ATAC-Seq in frozen liver
peak_68683	chr4	59876647	59877156	11.6565182156425	3.59467942324319	0.858138701086107	4.18892589122663	2.80277903525181e-05	0.00154737422432005	15.5	139.5	standard ATAC-Seq in frozen liver
peak_12061	chr10	110229852	110230914	11.4458552795767	4.00968856958201	0.957482312710486	4.18774165992811	2.81743956808697e-05	0.00155386369247887	31.5	293	standard ATAC-Seq in frozen liver
peak_57836	chr2	122081842	122082083	13.8477670637839	-3.17492910128302	0.758224317195693	-4.18732165307696	2.82265665556188e-05	0.00155433614875969	105.5	8	FFPE-ATAC in frozen liver
peak_59700	chr2	160445565	160446219	11.6654271948801	3.5954014973865	0.85873421291106	4.18686182910809	2.82837885984133e-05	0.00155480584272906	22.5	180.5	standard ATAC-Seq in frozen liver
peak_52904	chr1_random	1133360	1133589	11.4259891205597	4.01012033703567	0.957804021932343	4.18678586141805	2.82932528820238e-05	0.00155480584272906	5.5	61.5	standard ATAC-Seq in frozen liver
peak_57905	chr2	124684132	124684729	11.4259891205597	4.01012033703567	0.957804021932343	4.18678586141805	2.82932528820238e-05	0.00155480584272906	11.5	164	standard ATAC-Seq in frozen liver
peak_92488	chr7	146552474	146552821	11.6520637260237	3.59431770168431	0.85868747449742	4.18582756641237	2.84128989889757e-05	0.00155977772329675	9.5	94.5	standard ATAC-Seq in frozen liver
peak_47634	chr18	43519565	43520461	11.6698816844988	3.59576701022419	0.859913910977083	4.18154301764752	2.89537456258328e-05	0.00157953039742583	31	248.5	standard ATAC-Seq in frozen liver
peak_4907	chr1	152887925	152888583	12.1722238577924	3.31153544789575	0.792413199566666	4.17905134556904	2.92727596951969e-05	0.0015906502281731	25.5	186.5	standard ATAC-Seq in frozen liver
peak_104099	chrUn_random	2378029	2378239	11.6585664161843	3.59286494882229	0.859827882437684	4.17858622895109	2.93326784172706e-05	0.00159228796815457	5.5	58	standard ATAC-Seq in frozen liver
peak_102889	chr9	103974504	103974823	13.0825207915172	-3.88655064396249	0.930320787268443	-4.17764570796485	2.94541975804956e-05	0.00159645333758775	138	7.5	FFPE-ATAC in frozen liver
peak_27220	chr13	66694228	66694428	11.6633789943382	3.59723723143542	0.861704756814297	4.17455886484174	2.98564016135416e-05	0.00160915495835146	6.5	54.5	standard ATAC-Seq in frozen liver
peak_52286	chr19	48000189	48000835	7.45661738098281	6.50718821124633	1.56004406335894	4.17115667696953	3.0305739371274e-05	0.00162583970453865	3	122	standard ATAC-Seq in frozen liver
peak_78204	chr5	119244129	119244774	7.45661738098281	6.50718821124633	1.56004406335894	4.17115667696953	3.0305739371274e-05	0.00162583970453865	3.5	123.5	standard ATAC-Seq in frozen liver
peak_41150	chr16	90071422	90071764	7.45216289136402	6.50663559316745	1.560014767497	4.17088076903732	3.03424597770293e-05	0.00162583970453865	1	64	standard ATAC-Seq in frozen liver
peak_39581	chr16	33582615	33582826	11.7675032316179	4.66720014637239	1.11930579560963	4.16972749062772	3.04964071059002e-05	0.00163049307933386	4	61	standard ATAC-Seq in frozen liver
peak_60148	chr2	166943495	166944226	11.7675032316179	4.66720014637239	1.11930579560963	4.16972749062772	3.04964071059002e-05	0.00163049307933386	13.5	215	standard ATAC-Seq in frozen liver
peak_57384	chr2	113237893	113238704	11.7630487419991	4.66685164773313	1.11928762008268	4.1694838431148	3.05290256452987e-05	0.00163049307933386	15.5	233.5	standard ATAC-Seq in frozen liver
peak_73145	chr4	146893399	146894022	11.7630487419991	4.66685164773313	1.11928762008268	4.1694838431148	3.05290256452987e-05	0.00163049307933386	11.5	178.5	standard ATAC-Seq in frozen liver
peak_106121	chrX	123304229	123304483	11.7585942523803	4.66650206925782	1.1196827031935	4.16770041722379	3.07687949844287e-05	0.00164108936001986	3	73	standard ATAC-Seq in frozen liver
peak_105702	chrX	92139963	92140183	11.4527160582724	4.01239307636761	0.962865281980087	4.16713859296735	3.0844698315108e-05	0.00164431764362878	5	61	standard ATAC-Seq in frozen liver
peak_915	chr1	38535001	38535550	11.7764122108554	4.66790311188866	1.12058796994966	4.16558381587691	3.10556797609659e-05	0.00165309275159678	7.5	159.5	standard ATAC-Seq in frozen liver
peak_28988	chr13	113616187	113616551	11.7764122108554	4.66790311188866	1.12058796994966	4.16558381587691	3.10556797609659e-05	0.00165309275159678	7.5	106.5	standard ATAC-Seq in frozen liver
peak_104336	chrX	4229590	4229900	7.4655263602204	6.50830729175725	1.56245197479636	4.16544469637572	3.10746248115613e-05	0.00165327826006147	1.5	58	standard ATAC-Seq in frozen liver
peak_104282	chrUn_random	5484851	5485067	11.4126256517033	4.00902331572274	0.962659036722406	4.1645309115597	3.1199335667354e-05	0.00165538380556088	5.5	57.5	standard ATAC-Seq in frozen liver
peak_2612	chr1	85007776	85008027	7.44325391212644	6.50551817537567	1.56230528324262	4.16405055090977	3.12650845457381e-05	0.00165763851077674	0.5	47.5	standard ATAC-Seq in frozen liver
peak_19076	chr11	115670654	115671127	11.6787906637364	3.59651959835634	0.86409882636921	4.16216234602271	3.15248088144499e-05	0.0016664515718282	16.5	132	standard ATAC-Seq in frozen liver
peak_85725	chr6	129375907	129376188	11.7808667004742	4.6682621149139	1.12186995625725	4.16114371267059	3.16657727132286e-05	0.00167142451538991	4	82	standard ATAC-Seq in frozen liver
peak_49407	chr18	85073499	85073812	13.1368101549664	-3.44562376117211	0.831365854722691	-4.14453365097779	3.40505953466491e-05	0.00176678147296231	133	9.5	FFPE-ATAC in frozen liver
peak_43621	chr17	34960031	34962133	13.1303074648058	-3.44513092279379	0.83147816654364	-4.14338110297568	3.42222533036482e-05	0.00177310733819711	887	65	FFPE-ATAC in frozen liver
peak_86292	chr6	141602601	141602976	13.1303074648058	-3.44513092279379	0.83147816654364	-4.14338110297568	3.42222533036482e-05	0.00177310733819711	156.5	10	FFPE-ATAC in frozen liver
peak_33557	chr15	3434688	3434984	13.6412005288018	-3.15009919752549	0.76043924349223	-4.14247321463713	3.43580505796136e-05	0.00177722534947771	127	10.5	FFPE-ATAC in frozen liver
peak_24407	chr13	9014426	9014684	13.6302433490224	-3.15022786271509	0.760497695910199	-4.1423240065767	3.43804172635491e-05	0.00177722534947771	110	8	FFPE-ATAC in frozen liver
peak_52470	chr19	55333295	55334198	13.6346978386412	-3.14962368748686	0.760377579755124	-4.14218379308498	3.44014482407621e-05	0.00177722534947771	385.5	33	FFPE-ATAC in frozen liver
peak_70165	chr4	101099026	101099736	13.6237406588618	-3.14975238719302	0.760778655018658	-4.14016924162492	3.47049680969553e-05	0.00179193257337406	305.5	27.5	FFPE-ATAC in frozen liver
peak_66027	chr3	137876611	137876904	13.6281951484806	-3.14914646833427	0.760658300291973	-4.14002774586893	3.47263816896802e-05	0.00179193257337406	127.5	9.5	FFPE-ATAC in frozen liver
peak_9371	chr10	56159720	56160241	11.1565823314259	3.97321580035648	0.961288373631893	4.13321944729766	3.57716879348037e-05	0.00183471872233092	12.5	140	standard ATAC-Seq in frozen liver
peak_38425	chr16	15948280	15949011	11.1675395112053	3.97201747452605	0.961198054690123	4.13236112489488	3.59055709550226e-05	0.00183857103976975	16	198.5	standard ATAC-Seq in frozen liver
peak_104195	chrUn_random	4074336	4074727	11.1675395112053	3.97201747452605	0.961198054690123	4.13236112489488	3.59055709550226e-05	0.00183857103976975	7.5	103	standard ATAC-Seq in frozen liver
peak_3945	chr1	132325191	132325750	11.1610368210447	3.97359550978248	0.961594812382152	4.13229715740533	3.59155677730203e-05	0.00183857103976975	15	149.5	standard ATAC-Seq in frozen liver
peak_16935	chr11	83995474	83995899	13.6257888594036	-3.15084981278912	0.762549471066495	-4.13199396543069	3.59629864747477e-05	0.00183923759475038	181.5	15	FFPE-ATAC in frozen liver
peak_31830	chr14	63962318	63963119	11.8870473107252	3.27243071978116	0.792061682340805	4.13153519825633	3.6034849912732e-05	0.00184203193824935	30.5	223	standard ATAC-Seq in frozen liver
peak_87900	chr7	30015564	30015995	11.1654913106635	3.9739822520908	0.962469327542817	4.12894430852812	3.64432653266546e-05	0.00185669668926494	11.5	116	standard ATAC-Seq in frozen liver
peak_97806	chr8	123873012	123873346	11.8716356413271	3.27306278594858	0.792845988079769	4.12824537824271	3.65541917983909e-05	0.00185963983128528	13.5	92	standard ATAC-Seq in frozen liver
peak_49863	chr19	7141097	7141434	11.1541760423489	3.9708771752284	0.961972137235995	4.12785050785129	3.6617002892054e-05	0.0018611148632478	8	91	standard ATAC-Seq in frozen liver
peak_23981	chr12	116546606	116546806	7.17830161261144	6.45246398832079	1.56367689307538	4.12646884845265	3.68375876952016e-05	0.00186779437492872	0	36.5	standard ATAC-Seq in frozen liver
peak_31980	chr14	66135118	66135714	7.17830161261144	6.45246398832079	1.56367689307538	4.12646884845265	3.68375876952016e-05	0.00186779437492872	4	111	standard ATAC-Seq in frozen liver
peak_73124	chr4	146711028	146711287	11.7986846589494	4.6697973128701	1.1317257725391	4.12626223258407	3.68706825898366e-05	0.00186779437492872	4	74.5	standard ATAC-Seq in frozen liver
peak_91085	chr7	118884984	118885549	11.4891874632465	4.63140149114566	1.12257831438653	4.12568230812176	3.69637234190554e-05	0.00186846845357614	8	159.5	standard ATAC-Seq in frozen liver
peak_30477	chr14	32774766	32775118	7.18275610223023	6.45303738356428	1.56412157062032	4.12566229171371	3.69669387500423e-05	0.00186846845357614	1	65.5	standard ATAC-Seq in frozen liver
peak_85631	chr6	128577026	128577228	7.17384712299265	6.4518908844998	1.56406253415995	4.12508499090485	3.70597876807844e-05	0.00186846845357614	1	37	standard ATAC-Seq in frozen liver
peak_74157	chr5	15975567	15976754	12.3804805047812	3.04641025151197	0.738553451874657	4.12483381369259	3.71002543093355e-05	0.00186846845357614	53	336	standard ATAC-Seq in frozen liver
peak_99251	chr9	27020629	27021000	12.3804805047812	3.04641025151197	0.738553451874657	4.12483381369259	3.71002543093355e-05	0.00186846845357614	17	106.5	standard ATAC-Seq in frozen liver
peak_94055	chr8	35317993	35318470	11.4847329736277	4.63104221487435	1.12277759290744	4.12463006398467	3.71331108058708e-05	0.00186846845357614	9	134	standard ATAC-Seq in frozen liver
peak_20090	chr12	15807032	15807437	11.3826569368899	3.55738382970631	0.862490226630549	4.12454972806333	3.71460732969531e-05	0.00186846845357614	13	107.5	standard ATAC-Seq in frozen liver
peak_47090	chr18	34277470	34278374	11.3826569368899	3.55738382970631	0.862490226630549	4.12454972806333	3.71460732969531e-05	0.00186846845357614	33	240.5	standard ATAC-Seq in frozen liver
peak_49769	chr19	5951927	5952591	11.3826569368899	3.55738382970631	0.862490226630549	4.12454972806333	3.71460732969531e-05	0.00186846845357614	23.5	178	standard ATAC-Seq in frozen liver
peak_68565	chr4	57878951	57879375	11.3826569368899	3.55738382970631	0.862490226630549	4.12454972806333	3.71460732969531e-05	0.00186846845357614	10	112.5	standard ATAC-Seq in frozen liver
peak_97382	chr8	118063549	118063976	11.3826569368899	3.55738382970631	0.862490226630549	4.12454972806333	3.71460732969531e-05	0.00186846845357614	14	112.5	standard ATAC-Seq in frozen liver
peak_11063	chr10	85735927	85736968	11.3871114265087	3.55775573417297	0.862818194302318	4.12341297119934	3.73299542093971e-05	0.00187331204748884	29	283.5	standard ATAC-Seq in frozen liver
peak_28627	chr13	107550229	107551097	11.3871114265087	3.55775573417297	0.862818194302318	4.12341297119934	3.73299542093971e-05	0.00187331204748884	24.5	232	standard ATAC-Seq in frozen liver
peak_69022	chr4	62280387	62280922	11.3871114265087	3.55775573417297	0.862818194302318	4.12341297119934	3.73299542093971e-05	0.00187331204748884	15.5	144.5	standard ATAC-Seq in frozen liver
peak_71573	chr4	126939036	126939471	11.3871114265087	3.55775573417297	0.862818194302318	4.12341297119934	3.73299542093971e-05	0.00187331204748884	14	116.5	standard ATAC-Seq in frozen liver
peak_90391	chr7	105720889	105721533	11.3871114265087	3.55775573417297	0.862818194302318	4.12341297119934	3.73299542093971e-05	0.00187331204748884	21.5	174	standard ATAC-Seq in frozen liver
peak_31196	chr14	51607268	51607765	11.1764484904429	3.97276489966427	0.963521673741921	4.12317128709279	3.73691600802711e-05	0.00187393802541571	9	136	standard ATAC-Seq in frozen liver
peak_73047	chr4	145175024	145175429	11.1699458002823	3.97437876640704	0.96392506361611	4.12312006028496	3.7377475085906e-05	0.00187393802541571	11.5	110	standard ATAC-Seq in frozen liver
peak_11117	chr10	86453364	86453846	11.4980964424841	4.63212266096783	1.12349312918023	4.12296483232408	3.7402682021715e-05	0.00187432306125594	8	139.5	standard ATAC-Seq in frozen liver
peak_94990	chr8	67404674	67405173	11.3782024472711	3.55701191201285	0.862767222029222	4.12279444697352	3.74303688925566e-05	0.00187483195269373	15.5	135	standard ATAC-Seq in frozen liver
peak_56765	chr2	93027504	93027981	11.8959562899628	3.27313863493714	0.79394055617159	4.12264949748925	3.74539378623484e-05	0.00187513420461689	19	131	standard ATAC-Seq in frozen liver
peak_68848	chr4	61098109	61098337	13.1522218243646	-3.44475006649805	0.83563628225024	-4.12230792231982	3.75095341492982e-05	0.00187703887337005	95.5	6	FFPE-ATAC in frozen liver
peak_39992	chr16	41705795	41706119	11.8671811517083	3.27270810338576	0.794043043225434	4.12157518576309	3.76290620030123e-05	0.00187921770797591	14	88.5	standard ATAC-Seq in frozen liver
peak_3042	chr1	92797078	92797441	7.16939263337386	6.45131242209133	1.56528997601253	4.12148069747793	3.76445017244963e-05	0.00187921770797591	1	66.5	standard ATAC-Seq in frozen liver
peak_98249	chr8	128644704	128645012	7.16939263337386	6.45131242209133	1.56528997601253	4.12148069747793	3.76445017244963e-05	0.00187921770797591	2	55	standard ATAC-Seq in frozen liver
peak_6247	chr1	175696818	175697479	11.3915659161275	3.55813024791964	0.863728831676143	4.1194992194654	3.79696710693028e-05	0.00189033456912485	17.5	177	standard ATAC-Seq in frozen liver
peak_84569	chr6	114452310	114452550	12.3893894840188	3.04709404067671	0.739788909813354	4.1188695859816	3.80735537296854e-05	0.001892862743979	10.5	67	standard ATAC-Seq in frozen liver
peak_35556	chr15	66919751	66920098	12.3695233250018	3.04730569830196	0.740197842877353	4.1168800039409	3.84035891590995e-05	0.00190339837956963	17	98.5	standard ATAC-Seq in frozen liver
peak_52883	chr1_random	872325	872575	11.1809029800617	3.9731426037048	0.9655750548711	4.11479416712479	3.87525064003511e-05	0.00191327529175768	5.5	66.5	standard ATAC-Seq in frozen liver
peak_81532	chr6	36555714	36556264	11.893908089421	3.27488085808436	0.796054294643736	4.11389132640757	3.89044641460427e-05	0.00191900576167604	19.5	154	standard ATAC-Seq in frozen liver
peak_74064	chr5	14923107	14923323	11.9004107795816	3.27349566094665	0.79582200707399	4.1133515181144	3.89955896372402e-05	0.00192172781576813	8	60	standard ATAC-Seq in frozen liver
peak_88315	chr7	39201456	39201675	12.3828867938582	3.04834540940896	0.741183113810354	4.11281011751293	3.90871873866794e-05	0.00192446810862988	11	61	standard ATAC-Seq in frozen liver
peak_97358	chr8	117613492	117614418	11.3960204057463	3.55851015449162	0.865291488518657	4.11249873794974	3.91399611097712e-05	0.00192570041760561	30	248	standard ATAC-Seq in frozen liver
peak_98532	chr8_random	710904	711253	11.1452670631113	3.97007295282323	0.965379025747967	4.11244997761087	3.91482313082654e-05	0.00192570041760561	8	94	standard ATAC-Seq in frozen liver
peak_33242	chr14	119686029	119686375	11.3850632259669	3.55963916613892	0.865602317681609	4.11232628821155	3.9169217599741e-05	0.00192584687857412	11	94	standard ATAC-Seq in frozen liver
peak_52866	chr1_random	535328	535573	12.365068835383	3.0469695631026	0.741076252553029	4.11154662236943	3.93017489261797e-05	0.00193032064194019	12	69	standard ATAC-Seq in frozen liver
peak_105101	chrX	47919505	47920044	11.5114599113404	4.63324637801825	1.12829545332327	4.10641234472013	4.01851856018322e-05	0.00196326756396558	9	150.5	standard ATAC-Seq in frozen liver
peak_92158	chr7	138592507	138593222	12.6368742707499	-3.83308201873235	0.93552657587532	-4.09724546322583	4.18095495239921e-05	0.0020304593172326	293	18.5	FFPE-ATAC in frozen liver
peak_61208	chr3	14872754	14873594	12.6454251614523	-3.83483159026994	0.936152703449188	-4.09637399554664	4.19671744341416e-05	0.00203626482160285	345	17.5	FFPE-ATAC in frozen liver
peak_98059	chr8	126184251	126184705	12.6259170909705	-3.83329225922216	0.936003337672518	-4.0953831091608	4.21470839249735e-05	0.00204145679589776	189.5	9	FFPE-ATAC in frozen liver
peak_88684	chr7	53985638	53986413	13.410671433719	-3.1240013695708	0.763288124897254	-4.09282061081629	4.26157409430387e-05	0.00205932432024745	325.5	28.5	FFPE-ATAC in frozen liver
peak_88762	chr7	56146990	56147240	13.410671433719	-3.1240013695708	0.763288124897254	-4.09282061081629	4.26157409430387e-05	0.00205932432024745	105	10	FFPE-ATAC in frozen liver
peak_70597	chr4	107714599	107715026	12.9151900391212	-3.41772307465137	0.835126790487196	-4.09246010735393	4.26820690018989e-05	0.00206066716794315	177	13	FFPE-ATAC in frozen liver
peak_68753	chr4	60511261	60511480	12.6238688904287	-3.83204984515073	0.936402710575696	-4.0923096461295	4.2709780913917e-05	0.00206107457633275	91.5	5	FFPE-ATAC in frozen liver
peak_2758	chr1	88919872	88921345	13.4086232331772	-3.12289543600694	0.763282186547439	-4.09140353469109	4.28770295569541e-05	0.00206821229760537	627	52	FFPE-ATAC in frozen liver
peak_13484	chr11	7073731	7073955	11.3603844887959	3.55547046767737	0.870138730595635	4.08609609325578	4.38692149847082e-05	0.00210279246134008	7	58.5	standard ATAC-Seq in frozen liver
peak_63492	chr3	87569042	87569404	11.9093197588192	3.27422770688957	0.801605838679614	4.0845856515751	4.41555371951808e-05	0.00211272885553264	16	99.5	standard ATAC-Seq in frozen liver
peak_20017	chr12	12313067	12313676	11.2153261844939	4.5950600377966	1.12605648842182	4.08066565491456	4.49069114927494e-05	0.0021419715468881	6.5	169.5	standard ATAC-Seq in frozen liver
peak_52914	chr2	3031174	3031444	11.2153261844939	4.5950600377966	1.12605648842182	4.08066565491456	4.49069114927494e-05	0.0021419715468881	4	74.5	standard ATAC-Seq in frozen liver
peak_20230	chr12	19128296	19128577	11.2108716948751	4.59469015685164	1.12603605703341	4.08041121609956	4.49560983963573e-05	0.0021424065090945	3	76.5	standard ATAC-Seq in frozen liver
peak_38734	chr16	21590762	21591323	11.2108716948751	4.59469015685164	1.12603605703341	4.08041121609956	4.49560983963573e-05	0.0021424065090945	11	152.5	standard ATAC-Seq in frozen liver
peak_27235	chr13	66846973	66847173	6.90444033385886	6.39617744107838	1.56784526450442	4.07959738494994	4.51137676840563e-05	0.00214650410450262	0.5	35	standard ATAC-Seq in frozen liver
peak_4142	chr1	134027643	134028319	6.89998584424007	6.39558336213547	1.56781928635206	4.07928606173514	4.51742211100818e-05	0.00214650410450262	3.5	116.5	standard ATAC-Seq in frozen liver
peak_77104	chr5	100651886	100652876	6.89998584424007	6.39558336213547	1.56781928635206	4.07928606173514	4.51742211100818e-05	0.00214650410450262	7	172.5	standard ATAC-Seq in frozen liver
peak_90151	chr7	97174599	97174823	11.2197806741127	4.59543124876402	1.12654020390172	4.07924300690554	4.51825876362731e-05	0.00214650410450262	2.5	62	standard ATAC-Seq in frozen liver
peak_93547	chr8	22128883	22129097	11.2197806741127	4.59543124876402	1.12654020390172	4.07924300690554	4.51825876362731e-05	0.00214650410450262	3	59	standard ATAC-Seq in frozen liver
peak_101652	chr9	71454248	71454942	11.2064172052563	4.59431908389192	1.12647889096638	4.07847774222433	4.53315412727293e-05	0.0021514156218288	11	188	standard ATAC-Seq in frozen liver
peak_1841	chr1	63480566	63481114	15.132806677269	6.06479861142758	1.48711392937578	4.07823401531401	4.53790787790679e-05	0.00215201476964734	4.5	206	standard ATAC-Seq in frozen liver
peak_65403	chr3	122011260	122011513	6.90889482347765	6.39677486864731	1.56876816360159	4.07757820248057	4.55072260969773e-05	0.00215547300793725	0	45	standard ATAC-Seq in frozen liver
peak_41536	chr16	95594495	95594972	10.8892237428339	3.9333356233228	0.965070475609952	4.07569780936135	4.58765646280064e-05	0.002159292126453	11	124.5	standard ATAC-Seq in frozen liver
peak_84581	chr6	114498003	114498232	10.8892237428339	3.9333356233228	0.965070475609952	4.07569780936135	4.58765646280064e-05	0.002159292126453	5.5	60.5	standard ATAC-Seq in frozen liver
peak_103759	chr9	120269589	120270165	10.8827210526733	3.93496112549095	0.965472695369008	4.07568349096293	4.5879387859368e-05	0.002159292126453	13	150.5	standard ATAC-Seq in frozen liver
peak_32148	chr14	68666350	68666815	10.8847692532151	3.93294735903434	0.965043650585659	4.07540877207735	4.59335874947375e-05	0.002159292126453	8.5	121	standard ATAC-Seq in frozen liver
peak_90635	chr7	108222700	108223386	10.8782665630545	3.93457233485356	0.965445718063877	4.07539467132758	4.59363710870736e-05	0.002159292126453	20.5	181	standard ATAC-Seq in frozen liver
peak_71605	chr4	128401450	128401650	10.8936782324527	3.93372075539344	0.965693473752818	4.07346726710957	4.63183639372294e-05	0.00216497887023742	5	53	standard ATAC-Seq in frozen liver
peak_33708	chr15	7023309	7023618	10.8871755422921	3.93535589492403	0.966097473369093	4.07345635756626	4.63205346515604e-05	0.00216497887023742	7.5	80	standard ATAC-Seq in frozen liver
peak_62403	chr3	57348060	57348522	10.8871755422921	3.93535589492403	0.966097473369093	4.07345635756626	4.63205346515604e-05	0.00216497887023742	13.5	121.5	standard ATAC-Seq in frozen liver
peak_85718	chr6	129319320	129320089	10.8871755422921	3.93535589492403	0.966097473369093	4.07345635756626	4.63205346515604e-05	0.00216497887023742	21.5	202.5	standard ATAC-Seq in frozen liver
peak_92264	chr7	140314923	140315172	10.8871755422921	3.93535589492403	0.966097473369093	4.07345635756626	4.63205346515604e-05	0.00216497887023742	6.5	64	standard ATAC-Seq in frozen liver
peak_98798	chr9	14412979	14413338	10.8871755422921	3.93535589492403	0.966097473369093	4.07345635756626	4.63205346515604e-05	0.00216497887023742	9.5	93.5	standard ATAC-Seq in frozen liver
peak_11380	chr10	92586878	92587384	10.8803147635963	3.93255314864586	0.965612951138317	4.07259776705558	4.64916746256617e-05	0.00216823950841414	11.5	133	standard ATAC-Seq in frozen liver
peak_39952	chr16	38625781	38626491	10.8803147635963	3.93255314864586	0.965612951138317	4.07259776705558	4.64916746256617e-05	0.00216823950841414	17	186	standard ATAC-Seq in frozen liver
peak_95553	chr8	77679823	77680062	11.2286896533503	4.59618761697623	1.12893263699856	4.0712682637964	4.67578636022631e-05	0.00217401703294018	4.5	66	standard ATAC-Seq in frozen liver
peak_82973	chr6	72644173	72644697	11.2084654057981	4.59225844005278	1.12835482089553	4.06987089079665	4.70391986150225e-05	0.00218256670655084	7	142	standard ATAC-Seq in frozen liver
peak_45149	chr17	74194949	74195506	10.8916300319109	3.93575950303428	0.967329594823899	4.06868509357535	4.72791949703347e-05	0.00219158640265827	16	145	standard ATAC-Seq in frozen liver
peak_79164	chr5	135936042	135936446	10.8960845215297	3.93617467437755	0.969188220531388	4.06131088986969	4.87979374682725e-05	0.00224834236747936	11.5	103.5	standard ATAC-Seq in frozen liver
peak_36841	chr15	86000158	86000505	11.6022288521933	3.23614037047602	0.796931186351585	4.06075257926764	4.89147873670783e-05	0.00225178581414033	15.5	94	standard ATAC-Seq in frozen liver
peak_57658	chr2	119151288	119151648	11.6087315423539	3.2347554657181	0.796699210516773	4.06019665015095	4.90314023629978e-05	0.00225424296530379	14	97	standard ATAC-Seq in frozen liver
peak_91086	chr7	118923373	118923802	11.6087315423539	3.2347554657181	0.796699210516773	4.06019665015095	4.90314023629978e-05	0.00225424296530379	15.5	114.5	standard ATAC-Seq in frozen liver
peak_13296	chr11	4874450	4875152	11.6066833418121	3.23650991800152	0.797277541180405	4.05945201116506	4.91880152393056e-05	0.00225950049900176	24.5	188.5	standard ATAC-Seq in frozen liver
peak_84586	chr6	114511169	114511371	11.6131860319727	3.23512116972477	0.797017394428461	4.0590345861205	4.92760156035924e-05	0.0022620782912309	7.5	54	standard ATAC-Seq in frozen liver
peak_24123	chr12	118902031	118902561	11.1087956581373	3.51910009051132	0.867075704460165	4.05858458772326	4.9371050147588e-05	0.0022620782912309	18.5	138	standard ATAC-Seq in frozen liver
peak_70577	chr4	107290198	107290661	11.1087956581373	3.51910009051132	0.867075704460165	4.05858458772326	4.9371050147588e-05	0.0022620782912309	14	118.5	standard ATAC-Seq in frozen liver
peak_75773	chr5	65548926	65549677	11.1087956581373	3.51910009051132	0.867075704460165	4.05858458772326	4.9371050147588e-05	0.0022620782912309	22.5	194	standard ATAC-Seq in frozen liver
peak_96171	chr8	91458556	91458973	11.1087956581373	3.51910009051132	0.867075704460165	4.05858458772326	4.9371050147588e-05	0.0022620782912309	11	108.5	standard ATAC-Seq in frozen liver
peak_97391	chr8	118138056	118138538	11.1087956581373	3.51910009051132	0.867075704460165	4.05858458772326	4.9371050147588e-05	0.0022620782912309	18	126.5	standard ATAC-Seq in frozen liver
peak_65371	chr3	121781162	121781391	11.1043411685185	3.51871698631854	0.8670482448533	4.05827127522055	4.94373207539429e-05	0.00226251601123879	7	59.5	standard ATAC-Seq in frozen liver
peak_104356	chrX	4780880	4781278	11.1043411685185	3.51871698631854	0.8670482448533	4.05827127522055	4.94373207539429e-05	0.00226251601123879	13	103.5	standard ATAC-Seq in frozen liver
peak_65375	chr3	121823142	121823504	11.6042770527351	3.2343862404708	0.79699247602438	4.05823936582791	4.94440748301841e-05	0.00226251601123879	15.5	95.5	standard ATAC-Seq in frozen liver
peak_73155	chr4	147115191	147115426	6.92225829233402	6.39864736717118	1.57730099998735	4.05670659387302	4.97695398726056e-05	0.00227060786025451	1	40.5	standard ATAC-Seq in frozen liver
peak_46909	chr18	25839373	25839870	11.1132501477561	3.51948459710544	0.867744455901466	4.05589983683524	4.99416593742363e-05	0.00227444806671321	17.5	131.5	standard ATAC-Seq in frozen liver
peak_43152	chr17	29561078	29561379	12.4238050456071	-3.80637132995973	0.938483035689327	-4.05587654247144	4.99466375367891e-05	0.00227444806671321	122	7.5	FFPE-ATAC in frozen liver
peak_70614	chr4	107769170	107769595	12.4107996652859	-3.80532318326307	0.938383019489798	-4.05519186113581	5.00931688171716e-05	0.00227856800516355	174	11	FFPE-ATAC in frozen liver
peak_25895	chr13	41757736	41758337	11.6111378314308	3.23688553822526	0.798240789711334	4.05502397264841	5.0129161433995e-05	0.00227923571198554	23.5	162.5	standard ATAC-Seq in frozen liver
peak_6825	chr1	187100864	187101337	10.9005390111485	3.9366045069352	0.971702665661783	4.0512439103521	5.09460653701377e-05	0.00230852596805812	11	124.5	standard ATAC-Seq in frozen liver
peak_10712	chr10	80079084	80079511	12.6911636341991	-3.39117694092217	0.8371142529936	-4.05103237556283	5.09921506367025e-05	0.00230963557684808	173.5	12	FFPE-ATAC in frozen liver
peak_11555	chr10	94394599	94395257	11.1177046373749	3.51987322887993	0.869036680043358	4.0503160680218	5.11485000031144e-05	0.00231475642904488	22.5	170	standard ATAC-Seq in frozen liver
peak_99946	chr9	44529278	44529818	12.1021647364098	3.00970751902233	0.743317061287029	4.04902251780838	5.14319966029845e-05	0.00232561787937698	27	148	standard ATAC-Seq in frozen liver
peak_4908	chr1	152909410	152910027	11.0954321892809	3.51794372580411	0.868898732184679	4.04873847261684	5.14944475060118e-05	0.00232745761700989	19.5	161.5	standard ATAC-Seq in frozen liver
peak_45408	chr17	80652401	80652833	11.6155923210496	3.23727043320027	0.799893531919563	4.04712665375798	5.18501892822751e-05	0.00233760851250304	15.5	118	standard ATAC-Seq in frozen liver
peak_87901	chr7	30016414	30016845	12.1110737156474	3.01041056582965	0.743993584972071	4.04628564901223	5.20367294037648e-05	0.00234305507608809	21.5	116.5	standard ATAC-Seq in frozen liver
peak_99265	chr9	29239141	29239597	12.1110737156474	3.01041056582965	0.743993584972071	4.04628564901223	5.20367294037648e-05	0.00234305507608809	21	126	standard ATAC-Seq in frozen liver
peak_57835	chr2	122078693	122078969	12.7021208139785	-3.39099474528326	0.838337154374309	-4.04490571316039	5.23441864009975e-05	0.00235590696529304	112	9	FFPE-ATAC in frozen liver
peak_1867	chr1	64349336	64349692	11.5912716724139	3.23720666945758	0.800447875939802	4.04424418723929	5.24921875608562e-05	0.00236088031167528	16.5	95	standard ATAC-Seq in frozen liver
peak_47511	chr18	39588675	39588948	12.6891154336573	-3.38995838546901	0.838224181224221	-4.04421449703109	5.24988393491974e-05	0.00236088031167528	111	8.5	FFPE-ATAC in frozen liver
peak_2648	chr1	87500944	87501178	12.100116535868	3.0113344999495	0.744788034018888	4.04321009791241	5.27243358743038e-05	0.00236803349603619	12	64.5	standard ATAC-Seq in frozen liver
peak_12538	chr10	120332206	120332774	12.0956620462492	3.01098150912644	0.744761152423888	4.04288206940835	5.27981797949319e-05	0.00237035455461387	28	157	standard ATAC-Seq in frozen liver
peak_24768	chr13	21263048	21263600	13.1910995184156	-3.09729163690863	0.766291862613502	-4.0419216071864	5.3014957592515e-05	0.00237609662614667	229	23	FFPE-ATAC in frozen liver
peak_57860	chr2	122407008	122407786	11.1221591269937	3.52026892276328	0.871030768709457	4.04149778541004	5.3110882765037e-05	0.00237812217016257	21.5	202.5	standard ATAC-Seq in frozen liver
peak_63634	chr3	88900208	88900457	13.1890513178738	-3.09615900840944	0.766105344542954	-4.04142724034454	5.3126865451504e-05	0.00237812217016257	104	9	FFPE-ATAC in frozen liver
peak_36781	chr15	85554750	85555444	13.202056698195	-3.09715400051522	0.766599051256453	-4.04012240223751	5.3423312523045e-05	0.00238839281684862	285	25.5	FFPE-ATAC in frozen liver
peak_104252	chrUn_random	5176870	5177340	12.1155282052662	3.0107665947308	0.745277041910821	4.03979517068106	5.34979019330833e-05	0.00239072801288007	21.5	129.5	standard ATAC-Seq in frozen liver
peak_33080	chr14	115265738	115266037	11.0909776996621	3.51754783835969	0.870837339853362	4.03927079993148	5.3617633189767e-05	0.00239507772584816	11	76.5	standard ATAC-Seq in frozen liver
peak_801	chr1	36628370	36628923	11.6200468106684	3.2376671616188	0.80223228640005	4.03582256225009	5.44113275646231e-05	0.00242046348743746	21	149.5	standard ATAC-Seq in frozen liver
peak_55177	chr2	51801867	51803393	10.9370104161225	4.55739981734802	1.12944710014085	4.03507151134363	5.45856699898786e-05	0.00242716713640234	18.5	409	standard ATAC-Seq in frozen liver
peak_21730	chr12	74692673	74693049	10.9414649057413	4.55778126597407	1.12971425661899	4.03445494227416	5.47291904165633e-05	0.00243051698254022	7	102	standard ATAC-Seq in frozen liver
peak_43929	chr17	43502235	43502751	10.9414649057413	4.55778126597407	1.12971425661899	4.03445494227416	5.47291904165633e-05	0.00243051698254022	8	139.5	standard ATAC-Seq in frozen liver
peak_105703	chrX	92156859	92157075	10.9414649057413	4.55778126597407	1.12971425661899	4.03445494227416	5.47291904165633e-05	0.00243051698254022	4	58	standard ATAC-Seq in frozen liver
peak_74154	chr5	15821677	15822424	10.9459193953601	4.55816542205217	1.13047484450079	4.03208036359716	5.5285274123369e-05	0.00245012512618274	17	199.5	standard ATAC-Seq in frozen liver
peak_105105	chrX	47933415	47933803	10.9459193953601	4.55816542205217	1.13047484450079	4.03208036359716	5.5285274123369e-05	0.00245012512618274	5	103	standard ATAC-Seq in frozen liver
peak_11107	chr10	86334965	86335724	10.928101436885	4.5566344859205	1.13038537408255	4.03104515539117	5.55293729855841e-05	0.00245962479879455	8	201	standard ATAC-Seq in frozen liver
peak_75308	chr5	45150526	45150812	6.63057905510628	6.33760561378516	1.57285881129858	4.02935442663968	5.59302382985282e-05	0.00246949783377634	1.5	48.5	standard ATAC-Seq in frozen liver
peak_6256	chr1	176500133	176500519	6.62167007586869	6.33636790856411	1.5728241603795	4.02865626570437	5.60965679777945e-05	0.00247275798968564	1	63.5	standard ATAC-Seq in frozen liver
peak_11450	chr10	93198872	93199324	10.9503738849789	4.55855488574851	1.13174034440379	4.02791586275913	5.62734732714176e-05	0.00247733324282023	7.5	120.5	standard ATAC-Seq in frozen liver
peak_98505	chr8_random	159976	160176	10.9236469472662	4.5562453287828	1.13160605263844	4.02635291509754	5.66486467865624e-05	0.00248654431081962	3	53	standard ATAC-Seq in frozen liver
peak_9719	chr10	61992976	61993464	6.63503354472507	6.33823153555901	1.57434129190387	4.02595775652565	5.67438760956934e-05	0.00248654431081962	2.5	85	standard ATAC-Seq in frozen liver
peak_81461	chr6	34847796	34848006	12.5846331078425	-4.44563086036916	1.10566026685852	-4.02079281821385	5.80026014874027e-05	0.00252451778610556	89	3.5	FFPE-ATAC in frozen liver
peak_92931	chr8	3311313	3311899	10.604405284302	3.89526188433951	0.969482271963227	4.01787840478146	5.87244849852619e-05	0.00254397194480799	11.5	148	standard ATAC-Seq in frozen liver
peak_93780	chr8	26555568	26556027	10.604405284302	3.89526188433951	0.969482271963227	4.01787840478146	5.87244849852619e-05	0.00254397194480799	9.5	115	standard ATAC-Seq in frozen liver
peak_80908	chr6	23107417	23107808	10.6109079744626	3.89358767129318	0.969075800822418	4.01783603304183	5.87350427040737e-05	0.00254397194480799	10.5	98.5	standard ATAC-Seq in frozen liver
peak_100492	chr9	55107556	55107860	10.6109079744626	3.89358767129318	0.969075800822418	4.01783603304183	5.87350427040737e-05	0.00254397194480799	7	76	standard ATAC-Seq in frozen liver
peak_19311	chr11	117843720	117844148	10.6088597739207	3.89566534208475	0.969828110011749	4.01686164988304	5.89783251947869e-05	0.0025457864748855	12.5	107.5	standard ATAC-Seq in frozen liver
peak_99584	chr9	37208164	37208567	10.6088597739207	3.89566534208475	0.969828110011749	4.01686164988304	5.89783251947869e-05	0.0025457864748855	9	101	standard ATAC-Seq in frozen liver
peak_102578	chr9	96753348	96753707	10.6088597739207	3.89566534208475	0.969828110011749	4.01686164988304	5.89783251947869e-05	0.0025457864748855	10	92	standard ATAC-Seq in frozen liver
peak_24029	chr12	116876104	116876816	10.6153624640813	3.893985764996	0.969420628184253	4.01681752150202	5.89893656573071e-05	0.0025457864748855	15	184.5	standard ATAC-Seq in frozen liver
peak_36173	chr15	78583451	78583796	10.6153624640813	3.893985764996	0.969420628184253	4.01681752150202	5.89893656573071e-05	0.0025457864748855	8	88.5	standard ATAC-Seq in frozen liver
peak_104268	chrUn_random	5331605	5332037	10.6153624640813	3.893985764996	0.969420628184253	4.01681752150202	5.89893656573071e-05	0.0025457864748855	12	112	standard ATAC-Seq in frozen liver
peak_17280	chr11	88964496	88964788	10.5999507946832	3.89486323999632	0.969767709553045	4.01628472636135	5.91228200295633e-05	0.0025457864748855	6	72	standard ATAC-Seq in frozen liver
peak_31829	chr14	63957289	63957816	10.5999507946832	3.89486323999632	0.969767709553045	4.01628472636135	5.91228200295633e-05	0.0025457864748855	11	132.5	standard ATAC-Seq in frozen liver
peak_32467	chr14	75373933	75374372	10.5999507946832	3.89486323999632	0.969767709553045	4.01628472636135	5.91228200295633e-05	0.0025457864748855	12.5	112.5	standard ATAC-Seq in frozen liver
peak_40974	chr16	84972240	84972660	10.5999507946832	3.89486323999632	0.969767709553045	4.01628472636135	5.91228200295633e-05	0.0025457864748855	11.5	106	standard ATAC-Seq in frozen liver
peak_71579	chr4	126991081	126991605	10.5999507946832	3.89486323999632	0.969767709553045	4.01628472636135	5.91228200295633e-05	0.0025457864748855	15	133	standard ATAC-Seq in frozen liver
peak_25707	chr13	38441842	38442358	10.6064534848438	3.89318480209249	0.969360586780847	4.01624004027374	5.91340259738315e-05	0.0025457864748855	14.5	129.5	standard ATAC-Seq in frozen liver
peak_56746	chr2	92582102	92582769	10.6064534848438	3.89318480209249	0.969360586780847	4.01624004027374	5.91340259738315e-05	0.0025457864748855	16.5	166	standard ATAC-Seq in frozen liver
peak_93637	chr8	23738660	23739393	12.1977304401431	-3.77809142368871	0.941182010545086	-4.01419850927731	5.96481316983202e-05	0.00256025597971799	290.5	19.5	FFPE-ATAC in frozen liver
peak_68723	chr4	60234864	60235261	12.1867732603637	-3.77831821546131	0.941342470995362	-4.01375517612222	5.97603314223804e-05	0.00256243387408899	158.5	9.5	FFPE-ATAC in frozen liver
peak_36403	chr15	81192983	81193321	12.1997786406849	-3.77939486285691	0.94179839942851	-4.01295528337092	5.99632757892856e-05	0.00256701871482403	135.5	8	FFPE-ATAC in frozen liver
peak_97185	chr8	113973514	113973986	10.5954963050644	3.89446647594298	0.970689534735874	4.01206187620295	6.01907175728513e-05	0.00257366459277215	13.5	116.5	standard ATAC-Seq in frozen liver
peak_77446	chr5	106404716	106405010	6.64394252396265	6.33953062589761	1.58049792293806	4.01109709408081	6.0437247112981e-05	0.0025794405785012	1	52	standard ATAC-Seq in frozen liver
peak_52896	chr1_random	1056649	1056909	10.6177687531583	3.89649870590902	0.972445073522552	4.00690878282151	6.15186079415519e-05	0.00261212531861751	6	67	standard ATAC-Seq in frozen liver
peak_52882	chr1_random	868243	868499	10.5910418154456	3.8940687232988	0.972263361562116	4.00515835240595	6.19759494355618e-05	0.00262897503240363	6	63.5	standard ATAC-Seq in frozen liver
peak_70623	chr4	107797457	107797781	12.4650890287351	-3.36289907641702	0.84017463494511	-4.0026191419558	6.26451032026126e-05	0.00264686080260142	128.5	8	FFPE-ATAC in frozen liver
peak_9246	chr10	51864141	51864420	10.8304798897659	3.4793790018381	0.871514421939337	3.99233668915727	6.54253894935024e-05	0.00274588921783581	8.5	70	standard ATAC-Seq in frozen liver
peak_16599	chr11	78380129	78380808	10.8304798897659	3.4793790018381	0.871514421939337	3.99233668915727	6.54253894935024e-05	0.00274588921783581	22	172	standard ATAC-Seq in frozen liver
peak_35818	chr15	75423265	75423882	10.8304798897659	3.4793790018381	0.871514421939337	3.99233668915727	6.54253894935024e-05	0.00274588921783581	21	153.5	standard ATAC-Seq in frozen liver
peak_83825	chr6	92893270	92893851	10.8304798897659	3.4793790018381	0.871514421939337	3.99233668915727	6.54253894935024e-05	0.00274588921783581	21	147	standard ATAC-Seq in frozen liver
peak_73129	chr4	146777764	146777972	10.9681918434541	4.56021442087867	1.14232321646955	3.99205264773694	6.55038248589013e-05	0.00274810259968068	4	56	standard ATAC-Seq in frozen liver
peak_5363	chr1	159373363	159374028	10.8260254001471	3.47898363077168	0.871822813548424	3.9904709726645	6.59422196266588e-05	0.00276216021333931	17.5	168	standard ATAC-Seq in frozen liver
peak_19290	chr11	117743153	117743730	10.8260254001471	3.47898363077168	0.871822813548424	3.9904709726645	6.59422196266588e-05	0.00276216021333931	16.5	147	standard ATAC-Seq in frozen liver
peak_57891	chr2	124510114	124510781	10.8260254001471	3.47898363077168	0.871822813548424	3.9904709726645	6.59422196266588e-05	0.00276216021333931	21.5	169	standard ATAC-Seq in frozen liver
peak_91507	chr7	126772536	126773053	12.9715276031123	-3.07008081401246	0.769520350161074	-3.98960315132647	6.6183932942397e-05	0.00277119953207791	208.5	19.5	FFPE-ATAC in frozen liver
peak_33655	chr15	6198435	6198906	10.66314913737	4.51912136454279	1.13299449049537	3.98865255078773	6.64496648442418e-05	0.00278014894709639	8.5	120	standard ATAC-Seq in frozen liver
peak_58141	chr2	128576732	128577041	10.66314913737	4.51912136454279	1.13299449049537	3.98865255078773	6.64496648442418e-05	0.00278014894709639	5.5	79	standard ATAC-Seq in frozen liver
peak_47821	chr18	47741044	47741594	10.6586946477512	4.51872878712887	1.13296953503295	3.98839390416395	6.65221417480511e-05	0.00278150864505385	9.5	142	standard ATAC-Seq in frozen liver
peak_94401	chr8	42305068	42305364	14.0195436037835	5.95327498151392	1.49284363154287	3.98787579336837	6.66675497238163e-05	0.00278381925025974	3	105	standard ATAC-Seq in frozen liver
peak_105103	chrX	47925352	47926212	14.0195436037835	5.95327498151392	1.49284363154287	3.98787579336837	6.66675497238163e-05	0.00278381925025974	12	300.5	standard ATAC-Seq in frozen liver
peak_23338	chr12	105485738	105486335	11.3348702636013	3.19644694748416	0.801611520042823	3.98752621134163	6.67658299247002e-05	0.00278658388929259	23.5	153.5	standard ATAC-Seq in frozen liver
peak_97192	chr8	114034206	114034760	11.3304157739825	3.19606837178022	0.801583596358371	3.98719283465891	6.68596819218012e-05	0.00278658388929259	19.5	145.5	standard ATAC-Seq in frozen liver
peak_74202	chr5	17541671	17542516	10.6676036269887	4.51951540449282	1.13353880267478	3.98708486540402	6.68901041136917e-05	0.00278658388929259	15.5	221	standard ATAC-Seq in frozen liver
peak_105701	chrX	92124351	92124558	10.6676036269887	4.51951540449282	1.13353880267478	3.98708486540402	6.68901041136917e-05	0.00278658388929259	3	53.5	standard ATAC-Seq in frozen liver
peak_81531	chr6	36546148	36546985	10.6542401581324	4.51833489212161	1.13346388808007	3.98630687720898	6.71097032260194e-05	0.00279355568442479	12	216.5	standard ATAC-Seq in frozen liver
peak_4411	chr1	137092397	137092952	11.3328220630595	3.19826073667454	0.802551109601928	3.98511783039077	6.74466485223263e-05	0.00280321692434087	20	144.5	standard ATAC-Seq in frozen liver
peak_18145	chr11	101914526	101914799	11.3328220630595	3.19826073667454	0.802551109601928	3.98511783039077	6.74466485223263e-05	0.00280321692434087	11	71	standard ATAC-Seq in frozen liver
peak_59084	chr2	151369407	151369713	11.3328220630595	3.19826073667454	0.802551109601928	3.98511783039077	6.74466485223263e-05	0.00280321692434087	11	78.5	standard ATAC-Seq in frozen liver
peak_12207	chr10	114174301	114174641	11.3194585942031	3.19712098854532	0.802467112423124	3.9841146622088	6.77321649843777e-05	0.00280962373594428	15	89.5	standard ATAC-Seq in frozen liver
peak_32416	chr14	73907496	73908039	11.3194585942031	3.19712098854532	0.802467112423124	3.9841146622088	6.77321649843777e-05	0.00280962373594428	21.5	144	standard ATAC-Seq in frozen liver
peak_68234	chr4	49386684	49387815	11.3194585942031	3.19712098854532	0.802467112423124	3.9841146622088	6.77321649843777e-05	0.00280962373594428	44.5	297.5	standard ATAC-Seq in frozen liver
peak_6532	chr1	182297983	182298294	11.3259612843637	3.19568451559435	0.80223324759825	3.98348550768955	6.79118148019858e-05	0.00281380145800448	11	80.5	standard ATAC-Seq in frozen liver
peak_54471	chr2	32493261	32493859	11.3259612843637	3.19568451559435	0.80223324759825	3.98348550768955	6.79118148019858e-05	0.00281380145800448	26	152.5	standard ATAC-Seq in frozen liver
peak_96190	chr8	91646146	91646567	11.3259612843637	3.19568451559435	0.80223324759825	3.98348550768955	6.79118148019858e-05	0.00281380145800448	15.5	108.5	standard ATAC-Seq in frozen liver
peak_16181	chr11	74335928	74336485	10.8414370695453	3.47818670480471	0.873289074009721	3.98285837796476	6.80913350894625e-05	0.0028194757327272	18	138.5	standard ATAC-Seq in frozen liver
peak_73187	chr4	147459291	147459587	10.8325280903077	3.4773919467165	0.873227493028346	3.98222911495484	6.82719173000454e-05	0.00282325234499209	10	74	standard ATAC-Seq in frozen liver
peak_92486	chr7	146550082	146550433	10.6611009368281	4.52129586011743	1.13581005429765	3.98067955377736	6.87185350853674e-05	0.00283514329610112	6	90	standard ATAC-Seq in frozen liver
peak_52898	chr1_random	1078101	1078325	11.6334102795248	3.23895437315122	0.813725924510692	3.9803996352935	6.87995079970202e-05	0.00283738935044093	7.5	60	standard ATAC-Seq in frozen liver
peak_69331	chr4	76013296	76013552	12.9455168424698	-3.06803974412198	0.770837531218891	-3.98013799259441	6.88752758335291e-05	0.00283832490264423	104.5	8	FFPE-ATAC in frozen liver
peak_24028	chr12	116875307	116875596	10.8438433586223	3.4805767772984	0.874656633560164	3.97936360824386	6.90999889178452e-05	0.00284539226603213	9	74	standard ATAC-Seq in frozen liver
peak_40922	chr16	79086707	79087300	10.8438433586223	3.4805767772984	0.874656633560164	3.97936360824386	6.90999889178452e-05	0.00284539226603213	16	148	standard ATAC-Seq in frozen liver
peak_80033	chr5	147847527	147848052	11.3372765526783	3.19865267914381	0.803917343284611	3.97883278158286	6.92544262515951e-05	0.00285065399881421	21.5	137.5	standard ATAC-Seq in frozen liver
peak_1372	chr1	54062806	54063275	10.6765126062263	4.52031883956045	1.13622738768837	3.97835757924912	6.93929573642013e-05	0.00285525720183545	5.5	122	standard ATAC-Seq in frozen liver
peak_51208	chr19	34791735	34791963	12.9540677331723	-3.06973156434799	0.771761607319936	-3.97756449042357	6.96247429035799e-05	0.00286259145765703	92	7.5	FFPE-ATAC in frozen liver
peak_41148	chr16	89939974	89940245	6.3522632867349	6.27590891996505	1.57812966213291	3.9768018246884	6.98483278004183e-05	0.00286833883841085	0	44	standard ATAC-Seq in frozen liver
peak_102935	chr9	105220305	105220638	6.3522632867349	6.27590891996505	1.57812966213291	3.9768018246884	6.98483278004183e-05	0.00286833883841085	2	54	standard ATAC-Seq in frozen liver
peak_38283	chr16	12233477	12233699	6.34780879711611	6.27526345660449	1.57812800858753	3.97639698583198	6.99672871357803e-05	0.00286895387998973	1	35.5	standard ATAC-Seq in frozen liver
peak_81542	chr6	37173092	37173292	6.34780879711611	6.27526345660449	1.57812800858753	3.97639698583198	6.99672871357803e-05	0.00286895387998973	0.5	32.5	standard ATAC-Seq in frozen liver
peak_11918	chr10	105941915	105942209	6.35671777635369	6.27655821117898	1.5791892218591	3.97454473745073	7.05140074035366e-05	0.00288105058217528	0.5	46.5	standard ATAC-Seq in frozen liver
peak_47941	chr18	53665001	53665282	6.35671777635369	6.27655821117898	1.5791892218591	3.97454473745073	7.05140074035366e-05	0.00288105058217528	0.5	46.5	standard ATAC-Seq in frozen liver
peak_104261	chrUn_random	5264481	5264686	6.34335430749732	6.27461453221096	1.57918484301144	3.97332494671461	7.08762522570385e-05	0.00289070768120345	0.5	32.5	standard ATAC-Seq in frozen liver
peak_18501	chr11	106520854	106521397	11.3218648832801	3.19935917831241	0.805240283453408	3.97317328014369	7.0921415980251e-05	0.00289144693233399	25	141.5	standard ATAC-Seq in frozen liver
peak_27062	chr13	64198113	64198411	11.9781585248397	-3.74979286316707	0.944287177545103	-3.9710301615188	7.15625176545469e-05	0.00290540018050858	114.5	6.5	FFPE-ATAC in frozen liver
peak_8743	chr10	38692430	38692694	6.36117226597248	6.27721859903169	1.58134240805882	3.96955053316841	7.20083347520263e-05	0.00291906721381612	0.5	42.5	standard ATAC-Seq in frozen liver
peak_15524	chr11	61421511	61421937	6.36117226597248	6.27721859903169	1.58134240805882	3.96955053316841	7.20083347520263e-05	0.00291906721381612	1.5	68.5	standard ATAC-Seq in frozen liver
peak_104366	chrX	5195257	5195492	6.33889981787853	6.2739547783404	1.58133713487149	3.9674998075918	7.26305707546148e-05	0.00293538949581548	1	38	standard ATAC-Seq in frozen liver
peak_27201	chr13	66532813	66533031	10.8126619312908	3.47776770720088	0.876894133282111	3.96600635721441	7.30869137450233e-05	0.00294445785988312	7	55	standard ATAC-Seq in frozen liver
peak_85497	chr6	126084095	126084423	6.36562675559127	6.27789719747927	1.58465896448942	3.96167083149151	7.44271020425122e-05	0.00297984270510079	2	53	standard ATAC-Seq in frozen liver
peak_11142	chr10	86915756	86916176	10.3305440055494	3.85485018170126	0.973625790004429	3.95927287596165	7.51783010325828e-05	0.00299981057243409	11.5	103.5	standard ATAC-Seq in frozen liver
peak_50575	chr19	21960679	21961022	10.3305440055494	3.85485018170126	0.973625790004429	3.95927287596165	7.51783010325828e-05	0.00299981057243409	7.5	86	standard ATAC-Seq in frozen liver
peak_64374	chr3	100120241	100120584	10.3305440055494	3.85485018170126	0.973625790004429	3.95927287596165	7.51783010325828e-05	0.00299981057243409	7.5	84.5	standard ATAC-Seq in frozen liver
peak_92172	chr7	139437440	139437792	10.3260895159306	3.85443735760129	0.973591399197125	3.9589887100275	7.52677943539047e-05	0.00300171425358278	8.5	87	standard ATAC-Seq in frozen liver
peak_73123	chr4	146709992	146710428	10.3325922060912	3.85271373490449	0.973182245747908	3.95888206113297	7.53014076370039e-05	0.00300171425358278	10	107	standard ATAC-Seq in frozen liver
peak_90347	chr7	105322006	105322238	10.6364221996572	4.51669128031063	1.14093439851132	3.95876510183579	7.53382868421827e-05	0.00300171425358278	2.5	60.5	standard ATAC-Seq in frozen liver
peak_15246	chr11	58035772	58036095	12.2520198035923	-3.33513554198768	0.843556777071828	-3.95365864235561	7.69651926929585e-05	0.0030443896972007	125	9.5	FFPE-ATAC in frozen liver
peak_99093	chr9	22016663	22017206	12.2390144232711	-3.33405357756831	0.843443897344686	-3.95290497455079	7.7208104255707e-05	0.00304782482871947	210.5	14	FFPE-ATAC in frozen liver
peak_23340	chr12	105500966	105501404	10.339452984787	3.85569896241561	0.975713517607862	3.95167115432463	7.76073371300451e-05	0.00305906783094356	11	110	standard ATAC-Seq in frozen liver
peak_87689	chr7	27821320	27821616	12.2585224937529	-3.33567986973038	0.844213347231494	-3.95122853798674	7.77510316191965e-05	0.00305970815441784	114.5	8	FFPE-ATAC in frozen liver
peak_101147	chr9	64881784	64882174	12.2585224937529	-3.33567986973038	0.844213347231494	-3.95122853798674	7.77510316191965e-05	0.00305970815441784	151.5	9.5	FFPE-ATAC in frozen liver
peak_81427	chr6	34560381	34560926	10.3236832268536	3.8518663156601	0.975127179523417	3.95011686326153	7.81130446484247e-05	0.00306882104395955	12.5	135.5	standard ATAC-Seq in frozen liver
peak_79278	chr5	137436606	137436979	12.2499716030505	-3.33385632166618	0.84439821856941	-3.94820387863257	7.87397348164004e-05	0.00308550696281826	143.5	11.5	FFPE-ATAC in frozen liver
peak_86096	chr6	138022126	138022395	12.2434689128899	-3.33331187623302	0.844544155177739	-3.94687697001646	7.91772163352516e-05	0.00310092426064082	105.5	7.5	FFPE-ATAC in frozen liver
peak_37310	chr15	97593203	97593555	10.3439074744057	3.85614114516192	0.977801461407842	3.94368519311664	8.02389748250815e-05	0.00312251664076397	8	87.5	standard ATAC-Seq in frozen liver
peak_46491	chr18	12453390	12453866	10.3439074744057	3.85614114516192	0.977801461407842	3.94368519311664	8.02389748250815e-05	0.00312251664076397	10	118.5	standard ATAC-Seq in frozen liver
peak_101767	chr9	72918748	72919132	10.3504101645663	3.85435394353342	0.97738132288163	3.94355186998004	8.02836168713319e-05	0.0031231173898157	10	96.5	standard ATAC-Seq in frozen liver
peak_68560	chr4	57852070	57852638	10.3848333689986	4.47939606524333	1.13635310914107	3.94190505504856	8.08369775784729e-05	0.00313270440924349	9	142.5	standard ATAC-Seq in frozen liver
peak_91656	chr7	129964134	129965121	10.3892878586174	4.47980078616718	1.13665571307564	3.94121169201307	8.1071037400947e-05	0.00313776897163224	17.5	250.5	standard ATAC-Seq in frozen liver
peak_84570	chr6	114454692	114454892	10.3803788793798	4.47899142438825	1.13659892872551	3.94069650356842	8.12453651656174e-05	0.00314110560572884	4	49.5	standard ATAC-Seq in frozen liver
peak_93369	chr8	13977772	13978054	10.3803788793798	4.47899142438825	1.13659892872551	3.94069650356842	8.12453651656174e-05	0.00314110560572884	4.5	71	standard ATAC-Seq in frozen liver
peak_8650	chr10	33604210	33604459	13.4783237364389	5.89404576843203	1.49605230810775	3.93973241208857	8.15725435984561e-05	0.00315033811479787	2	84.5	standard ATAC-Seq in frozen liver
peak_11140	chr10	86831899	86832400	13.4673665566596	5.89438689353271	1.49632673135791	3.93923784826298	8.1740863903626e-05	0.0031556990054115	4.5	169	standard ATAC-Seq in frozen liver
peak_9373	chr10	56164205	56164828	10.3937423482362	4.48020850815727	1.13751136317126	3.93860549723822	8.19565570663939e-05	0.00315928055466143	10	159.5	standard ATAC-Seq in frozen liver
peak_28978	chr13	113550514	113551057	10.3937423482362	4.48020850815727	1.13751136317126	3.93860549723822	8.19565570663939e-05	0.00315928055466143	10	138	standard ATAC-Seq in frozen liver
peak_54470	chr2	32489259	32489559	10.3937423482362	4.48020850815727	1.13751136317126	3.93860549723822	8.19565570663939e-05	0.00315928055466143	5	75.5	standard ATAC-Seq in frozen liver
peak_99453	chr9	32640925	32641322	10.3937423482362	4.48020850815727	1.13751136317126	3.93860549723822	8.19565570663939e-05	0.00315928055466143	5.5	102.5	standard ATAC-Seq in frozen liver
peak_86297	chr6	141627511	141628017	12.7454529976483	-3.04182571709316	0.772519772189446	-3.93753768718713	8.2322005736494e-05	0.00316898235113569	201	20.5	FFPE-ATAC in frozen liver
peak_100645	chr9	57529405	57530357	12.7499074872671	-3.04115707030699	0.772389037678411	-3.9373384679926	8.23903570200034e-05	0.00317037697715969	378.5	33	FFPE-ATAC in frozen liver
peak_88056	chr7	31721920	31722398	12.7389503074877	-3.04130450415111	0.772458948512248	-3.93717298506108	8.24471743094763e-05	0.00317037697715969	189	15.5	FFPE-ATAC in frozen liver
peak_94976	chr8	67213530	67214190	12.7434047971065	-3.04063631562563	0.772328244682691	-3.93697412539259	8.25155002333242e-05	0.00317186379563316	263.5	21	FFPE-ATAC in frozen liver
peak_75255	chr5	44256664	44256938	10.3913360591592	4.47757602728797	1.13755552494433	3.93613843817171	8.28032183023611e-05	0.00317835368343008	5.5	69.5	standard ATAC-Seq in frozen liver
peak_46916	chr18	26068371	26068957	10.398196837855	4.48062211005184	1.13893385071837	3.93404946847944	8.35265808912503e-05	0.00320381959610094	12	148	standard ATAC-Seq in frozen liver
peak_74155	chr5	15823343	15823873	10.398196837855	4.48062211005184	1.13893385071837	3.93404946847944	8.35265808912503e-05	0.00320381959610094	6.5	132	standard ATAC-Seq in frozen liver
peak_48255	chr18	60811558	60811765	10.3483619640245	3.85659965362822	0.980628635884675	3.93278302560376	8.39680246263273e-05	0.00321729007005189	6	52.5	standard ATAC-Seq in frozen liver
peak_37834	chr16	3247196	3247427	10.4026513274737	4.48104439611394	1.14094647259821	3.92747995084248	8.58405741655554e-05	0.00326755033010996	3	59	standard ATAC-Seq in frozen liver
peak_6594	chr1	182966766	182967049	12.7694155577489	-3.0427325509194	0.775018174150541	-3.92601445024742	8.63649693633839e-05	0.00328446111553287	111	11	FFPE-ATAC in frozen liver
peak_49245	chr18	80911508	80912371	10.5566186110133	3.43893940616128	0.876143011894469	3.92508912297927	8.6697633540529e-05	0.00328837375909864	30.5	213	standard ATAC-Seq in frozen liver
peak_58768	chr2	144992727	144993230	10.5566186110133	3.43893940616128	0.876143011894469	3.92508912297927	8.6697633540529e-05	0.00328837375909864	14	124.5	standard ATAC-Seq in frozen liver
peak_58811	chr2	145681600	145681918	10.5566186110133	3.43893940616128	0.876143011894469	3.92508912297927	8.6697633540529e-05	0.00328837375909864	11	77.5	standard ATAC-Seq in frozen liver
peak_62233	chr3	52208449	52209037	10.5566186110133	3.43893940616128	0.876143011894469	3.92508912297927	8.6697633540529e-05	0.00328837375909864	20	144.5	standard ATAC-Seq in frozen liver
peak_79461	chr5	139490957	139491431	10.5566186110133	3.43893940616128	0.876143011894469	3.92508912297927	8.6697633540529e-05	0.00328837375909864	12.5	114.5	standard ATAC-Seq in frozen liver
peak_103081	chr9	107496238	107496466	12.7608646670465	-3.04099305791804	0.775078484305366	-3.92346468066832	8.72845665860174e-05	0.00330411478447508	88.5	9	FFPE-ATAC in frozen liver
peak_35223	chr15	58917232	58917432	12.7279931277083	-3.0414703413702	0.775289098165561	-3.92301445817661	8.74479013032011e-05	0.00330795582506651	78.5	6.5	FFPE-ATAC in frozen liver
peak_11515	chr10	93925163	93925880	10.5610731006321	3.43934814299986	0.876894642555144	3.92219084949373	8.77474431292481e-05	0.00331459689890451	27	182	standard ATAC-Seq in frozen liver
peak_19495	chr11	119903000	119903539	10.5610731006321	3.43934814299986	0.876894642555144	3.92219084949373	8.77474431292481e-05	0.00331459689890451	16	132.5	standard ATAC-Seq in frozen liver
peak_21686	chr12	73945059	73945626	10.5610731006321	3.43934814299986	0.876894642555144	3.92219084949373	8.77474431292481e-05	0.00331459689890451	19.5	138	standard ATAC-Seq in frozen liver
peak_11572	chr10	94654519	94654982	10.5477096317758	3.43812345061903	0.876793024070114	3.92124863706043	8.80913092329075e-05	0.00332054864929781	16.5	112	standard ATAC-Seq in frozen liver
peak_89211	chr7	74608586	74608913	10.5477096317758	3.43812345061903	0.876793024070114	3.92124863706043	8.80913092329075e-05	0.00332054864929781	11.5	80.5	standard ATAC-Seq in frozen liver
peak_914	chr1	38532379	38532736	6.07394751836353	6.21145602615027	1.5848238332604	3.9193353202997	8.87935069818066e-05	0.00333409018368238	1.5	55	standard ATAC-Seq in frozen liver
peak_1760	chr1	61373678	61373980	6.07394751836353	6.21145602615027	1.5848238332604	3.9193353202997	8.87935069818066e-05	0.00333409018368238	0	46.5	standard ATAC-Seq in frozen liver
peak_15620	chr11	63163620	63163970	6.07394751836353	6.21145602615027	1.5848238332604	3.9193353202997	8.87935069818066e-05	0.00333409018368238	2	55.5	standard ATAC-Seq in frozen liver
peak_20088	chr12	15783860	15784226	6.07394751836353	6.21145602615027	1.5848238332604	3.9193353202997	8.87935069818066e-05	0.00333409018368238	2	55.5	standard ATAC-Seq in frozen liver
peak_33144	chr14	118169065	118169364	6.07394751836353	6.21145602615027	1.5848238332604	3.9193353202997	8.87935069818066e-05	0.00333409018368238	0.5	46.5	standard ATAC-Seq in frozen liver
peak_42728	chr17	25570461	25570960	6.07394751836353	6.21145602615027	1.5848238332604	3.9193353202997	8.87935069818066e-05	0.00333409018368238	3	76.5	standard ATAC-Seq in frozen liver
peak_91637	chr7	129401049	129401560	6.07394751836353	6.21145602615027	1.5848238332604	3.9193353202997	8.87935069818066e-05	0.00333409018368238	3	80	standard ATAC-Seq in frozen liver
peak_105898	chrX	99994979	99995192	6.07394751836353	6.21145602615027	1.5848238332604	3.9193353202997	8.87935069818066e-05	0.00333409018368238	0.5	32.5	standard ATAC-Seq in frozen liver
peak_23991	chr12	116618299	116618613	6.07840200798232	6.21213412505363	1.58540235018621	3.91833285999861	8.91635231760614e-05	0.00334243276898561	1	48.5	standard ATAC-Seq in frozen liver
peak_80077	chr5	148391305	148391603	6.07840200798232	6.21213412505363	1.58540235018621	3.91833285999861	8.91635231760614e-05	0.00334243276898561	2	46.5	standard ATAC-Seq in frozen liver
peak_84590	chr6	114523036	114523267	6.07840200798232	6.21213412505363	1.58540235018621	3.91833285999861	8.91635231760614e-05	0.00334243276898561	1	36	standard ATAC-Seq in frozen liver
peak_33563	chr15	3452334	3452534	12.734853906404	-3.03887757765896	0.775669345830814	-3.9177487082515	8.93798095051226e-05	0.00334786726777956	80.5	7	FFPE-ATAC in frozen liver
peak_23470	chr12	107121154	107121444	6.06949302874474	6.21077810565577	1.58540281436213	3.91747639741298	8.94808038088077e-05	0.00334786726777956	0.5	45.5	standard ATAC-Seq in frozen liver
peak_29276	chr14	7919651	7919908	6.06949302874474	6.21077810565577	1.58540281436213	3.91747639741298	8.94808038088077e-05	0.00334786726777956	1.5	38.5	standard ATAC-Seq in frozen liver
peak_3599	chr1	121106117	121106672	10.5655275902509	3.43976157146583	0.878375751484424	3.91604796199435	9.00123484423571e-05	0.00335980123213865	17	141	standard ATAC-Seq in frozen liver
peak_61103	chr3	10146174	10147054	10.5655275902509	3.43976157146583	0.878375751484424	3.91604796199435	9.00123484423571e-05	0.00335980123213865	30	220.5	standard ATAC-Seq in frozen liver
peak_37311	chr15	97597932	97598859	11.0500518050693	3.15817874519915	0.80663961045447	3.9152289377654	9.03184649455336e-05	0.00336652712541318	40.5	235	standard ATAC-Seq in frozen liver
peak_104331	chrX	3908004	3908204	6.08285649760111	6.21282037200542	1.58715881250718	3.91442892988839	9.06184231335552e-05	0.00337417950956799	0	32	standard ATAC-Seq in frozen liver
peak_8654	chr10	33621395	33621650	13.2000079680676	5.86351167659181	1.49796160197218	3.91432708880659	9.06566752889645e-05	0.00337442888921913	2.5	84	standard ATAC-Seq in frozen liver
peak_1218	chr1	51321954	51323181	11.0545062946881	3.15857196734105	0.807027904140083	3.91383241042529	9.08426966936084e-05	0.00337782584899784	47.5	315.5	standard ATAC-Seq in frozen liver
peak_22287	chr12	82379578	82379887	11.0545062946881	3.15857196734105	0.807027904140083	3.91383241042529	9.08426966936084e-05	0.00337782584899784	14	79	standard ATAC-Seq in frozen liver
peak_60035	chr2	165761545	165761927	11.0545062946881	3.15857196734105	0.807027904140083	3.91383241042529	9.08426966936084e-05	0.00337782584899784	16.5	98.5	standard ATAC-Seq in frozen liver
peak_7410	chr10	3171659	3172071	10.5412069416152	3.43975864904564	0.878916090451312	3.9136371337557	9.0916228745208e-05	0.00337938497941738	15.5	103	standard ATAC-Seq in frozen liver
peak_37637	chr15	101058474	101058775	11.0610089848487	3.1570953564961	0.80679408802343	3.91313645372723	9.11050183529507e-05	0.00338167491183938	13	75.5	standard ATAC-Seq in frozen liver
peak_89209	chr7	74604761	74605155	11.0610089848487	3.1570953564961	0.80679408802343	3.91313645372723	9.11050183529507e-05	0.00338167491183938	13	100	standard ATAC-Seq in frozen liver
peak_93075	chr8	8994468	8995020	11.0610089848487	3.1570953564961	0.80679408802343	3.91313645372723	9.11050183529507e-05	0.00338167491183938	22	143	standard ATAC-Seq in frozen liver
peak_97706	chr8	122885149	122885455	11.0610089848487	3.1570953564961	0.80679408802343	3.91313645372723	9.11050183529507e-05	0.00338167491183938	13.5	76.5	standard ATAC-Seq in frozen liver
peak_70191	chr4	101423609	101423951	6.06503853912595	6.21009238559368	1.5871611451455	3.91270439336793	9.126823137254e-05	0.00338177149071413	2	51	standard ATAC-Seq in frozen liver
peak_6143	chr1	173495995	173496322	10.5542123219364	3.4364776585751	0.878303945955157	3.9126291922074	9.12966671999149e-05	0.00338177149071413	9.5	80.5	standard ATAC-Seq in frozen liver
peak_10919	chr10	82254501	82254705	11.7236668696564	-3.72032444177225	0.951524077506965	-3.90985843628852	9.23502268679118e-05	0.00340985076771721	79	5	FFPE-ATAC in frozen liver
peak_962	chr1	39474406	39475084	11.0589607843069	3.15897214782565	0.808137955633135	3.90895159150242	9.26975348493947e-05	0.00341356118431798	25	176.5	standard ATAC-Seq in frozen liver
peak_16455	chr11	77223371	77223758	11.0589607843069	3.15897214782565	0.808137955633135	3.90895159150242	9.26975348493947e-05	0.00341356118431798	15	97.5	standard ATAC-Seq in frozen liver
peak_20250	chr12	20280813	20281024	11.0589607843069	3.15897214782565	0.808137955633135	3.90895159150242	9.26975348493947e-05	0.00341356118431798	8.5	53	standard ATAC-Seq in frozen liver
peak_39580	chr16	33580661	33581210	11.0589607843069	3.15897214782565	0.808137955633135	3.90895159150242	9.26975348493947e-05	0.00341356118431798	21	139.5	standard ATAC-Seq in frozen liver
peak_45165	chr17	74319675	74320176	11.0589607843069	3.15897214782565	0.808137955633135	3.90895159150242	9.26975348493947e-05	0.00341356118431798	19	129	standard ATAC-Seq in frozen liver
peak_4213	chr1	134969843	134970494	11.0654634744675	3.1574832579035	0.807872971213703	3.90839076242379	9.2912940956145e-05	0.00341796250186075	22	161.5	standard ATAC-Seq in frozen liver
peak_47338	chr18	38159020	38159383	11.0654634744675	3.1574832579035	0.807872971213703	3.90839076242379	9.2912940956145e-05	0.00341796250186075	14	92.5	standard ATAC-Seq in frozen liver
peak_87340	chr7	20077099	20077501	10.5699820798697	3.44018263527277	0.880582949065022	3.90671047960384	9.35611460054934e-05	0.00343118497691408	14	99	standard ATAC-Seq in frozen liver
peak_78601	chr5	124104998	124105380	10.5497578323176	3.43604316895799	0.879750594326299	3.90570144665746	9.39524519380869e-05	0.00344317383749386	13	93	standard ATAC-Seq in frozen liver
peak_91024	chr7	117926744	117927022	6.06058404950715	6.20939086730655	1.59017720842857	3.90484207319429	9.42869376613995e-05	0.00345306535156589	0.5	43	standard ATAC-Seq in frozen liver
peak_91495	chr7	126686976	126687230	12.032447888289	-3.30628088845875	0.847101255426273	-3.90305275464972	9.49869887007585e-05	0.00347513294035936	97	7.5	FFPE-ATAC in frozen liver
peak_43947	chr17	43717903	43718440	10.052228237178	3.81284488446826	0.977453903211932	3.90079253040903	9.58782931910157e-05	0.00349459059153171	12	128	standard ATAC-Seq in frozen liver
peak_55237	chr2	52731690	52732027	10.052228237178	3.81284488446826	0.977453903211932	3.90079253040903	9.58782931910157e-05	0.00349459059153171	8	79.5	standard ATAC-Seq in frozen liver
peak_17305	chr11	90086134	90086784	10.0566827267968	3.81327312709889	0.97784538092192	3.89966880398178	9.63243608552894e-05	0.00350368395425299	16	158	standard ATAC-Seq in frozen liver
peak_67003	chr4	8866021	8866511	10.0566827267968	3.81327312709889	0.97784538092192	3.89966880398178	9.63243608552894e-05	0.00350368395425299	10.5	119	standard ATAC-Seq in frozen liver
peak_79089	chr5	135156100	135156452	10.0631854169574	3.81149858493424	0.977433494349454	3.89949659692298	9.63928920410384e-05	0.00350498452294342	9.5	83.5	standard ATAC-Seq in frozen liver
peak_24568	chr13	13630832	13631320	10.0477737475592	3.81242199291948	0.977768185380744	3.89910619911909	9.65484245156082e-05	0.00350706248956339	12.5	118.5	standard ATAC-Seq in frozen liver
peak_106463	chrX	145326223	145326469	6.09176547683869	6.21424838507717	1.59449191691801	3.89732197394182	9.7262271622044e-05	0.00352461201795654	0.5	38	standard ATAC-Seq in frozen liver
peak_1870	chr1	64420780	64421752	10.110972090246	4.4389615377966	1.13978695443271	3.89455373263675	9.83796830505407e-05	0.00355438237588902	19	233.5	standard ATAC-Seq in frozen liver
peak_24322	chr13	4770396	4771300	10.110972090246	4.4389615377966	1.13978695443271	3.89455373263675	9.83796830505407e-05	0.00355438237588902	15	224	standard ATAC-Seq in frozen liver
peak_15356	chr11	59715575	59716234	10.1065176006272	4.43854531297392	1.13975428767557	3.89430016712283	9.84826394464055e-05	0.00355438237588902	9.5	158.5	standard ATAC-Seq in frozen liver
peak_19912	chr12	8407102	8407627	10.1065176006272	4.43854531297392	1.13975428767557	3.89430016712283	9.84826394464055e-05	0.00355438237588902	9.5	128.5	standard ATAC-Seq in frozen liver
peak_27217	chr13	66690508	66690792	10.1065176006272	4.43854531297392	1.13975428767557	3.89430016712283	9.84826394464055e-05	0.00355438237588902	5.5	69	standard ATAC-Seq in frozen liver
peak_59513	chr2	156904742	156905278	10.1065176006272	4.43854531297392	1.13975428767557	3.89430016712283	9.84826394464055e-05	0.00355438237588902	9.5	133.5	standard ATAC-Seq in frozen liver
peak_11412	chr10	92798728	92799344	10.1154265798648	4.43937940066036	1.1404008779508	3.89282355572851	9.90842187510765e-05	0.00356526489536385	9.5	150.5	standard ATAC-Seq in frozen liver
peak_43942	chr17	43691362	43691851	10.1154265798648	4.43937940066036	1.1404008779508	3.89282355572851	9.90842187510765e-05	0.00356526489536385	6	120.5	standard ATAC-Seq in frozen liver
peak_70836	chr4	114725200	114725582	10.1154265798648	4.43937940066036	1.1404008779508	3.89282355572851	9.90842187510765e-05	0.00356526489536385	7.5	94	standard ATAC-Seq in frozen liver
peak_73148	chr4	146973069	146973269	10.1154265798648	4.43937940066036	1.1404008779508	3.89282355572851	9.90842187510765e-05	0.00356526489536385	3	49.5	standard ATAC-Seq in frozen liver
peak_80076	chr5	148386075	148386549	10.1020631110084	4.43812762734772	1.14030274587484	3.892060808766	9.93963230862767e-05	0.00356928925269421	10.5	116	standard ATAC-Seq in frozen liver
peak_21735	chr12	74783971	74784262	10.1198810694836	4.43980197188393	1.14160617587724	3.88908370127927	0.000100623412577765	0.00360126074888006	4	73	standard ATAC-Seq in frozen liver
peak_55127	chr2	50545683	50546255	10.1198810694836	4.43980197188393	1.14160617587724	3.88908370127927	0.000100623412577765	0.00360126074888006	6	144.5	standard ATAC-Seq in frozen liver
peak_30808	chr14	42768089	42768289	10.0655917060344	3.81415896546159	0.980783929668706	3.88888811295059	0.000100704527775818	0.00360175300863484	4.5	49.5	standard ATAC-Seq in frozen liver
peak_35533	chr15	66763922	66764281	10.072094396195	3.81234038657853	0.980364946128271	3.8886951248456	0.000100784625094226	0.00360323712123904	7	87	standard ATAC-Seq in frozen liver
peak_42093	chr17	10583065	10583976	11.0743724537051	3.15826723965775	0.8123437247839	3.88784592445509	0.000101137790212182	0.00360819724295435	40	237	standard ATAC-Seq in frozen liver
peak_70405	chr4	104935009	104935398	10.0976086213896	4.43770538615701	1.14144223329257	3.88780549441925	0.000101154633336548	0.00360819724295435	8.5	97	standard ATAC-Seq in frozen liver
peak_48830	chr18	69941626	69942219	10.0388647683216	3.8115792022862	0.980551124236082	3.88718049276185	0.000101415345654667	0.0036150852163215	15.5	140	standard ATAC-Seq in frozen liver
peak_103334	chr9	110557382	110557594	11.5260093139118	-3.69032916114811	0.950161191367011	-3.88389801086148	0.000102795040612675	0.00365500366926362	78.5	5.5	FFPE-ATAC in frozen liver
peak_68822	chr4	60888607	60889159	12.5238328818031	-3.01231927963546	0.775598166679627	-3.8838659102707	0.000102808620214748	0.00365500366926362	214	21	FFPE-ATAC in frozen liver
peak_8378	chr10	24560707	24561400	11.5195066237512	-3.68975228948272	0.950309146169641	-3.88268628619939	0.000103308815802875	0.00366731227781087	260	15	FFPE-ATAC in frozen liver
peak_86295	chr6	141614576	141614897	12.5128757020237	-3.01247177074028	0.775881304108833	-3.88264513500601	0.000103326306520953	0.00366731227781087	127	11	FFPE-ATAC in frozen liver
peak_37833	chr16	3246504	3246737	10.0931541317708	4.43727553158262	1.14319298380797	3.88147547652197	0.000103824623167206	0.00367767518280152	4.5	57	standard ATAC-Seq in frozen liver
peak_26286	chr13	48952032	48952641	12.5368382621243	-3.01338738254802	0.77656636095	-3.88039906706961	0.000104285215689092	0.00369032319013097	237.5	20.5	FFPE-ATAC in frozen liver
peak_84596	chr6	114551940	114552217	10.0700461956532	3.81462345994197	0.983382352768718	3.87908472142283	0.00010485023537259	0.0037078635319145	7	67	standard ATAC-Seq in frozen liver
peak_104297	chrUn_random	5728794	5729028	10.130838249263	4.43829725012431	1.14482820709204	3.87682380869872	0.000105828936337547	0.0037350629118815	3.5	58	standard ATAC-Seq in frozen liver
peak_2311	chr1	75118164	75118393	12.5149239025655	-3.01371495440918	0.778324124840929	-3.87205645851606	0.000107920944930212	0.00379636774009604	88.5	6.5	FFPE-ATAC in frozen liver
peak_65319	chr3	121493454	121493837	12.5084212124049	-3.01317768237664	0.778480121440159	-3.8705903970963	0.000108572086715961	0.00381676212403622	148.5	14	FFPE-ATAC in frozen liver
peak_3242	chr1	95954997	95955197	5.80008623961094	6.14469675851196	1.59161930628942	3.86065734075394	0.000113082395048736	0.00393777865324543	1	29	standard ATAC-Seq in frozen liver
peak_20849	chr12	40735104	40735416	5.80008623961094	6.14469675851196	1.59161930628942	3.86065734075394	0.000113082395048736	0.00393777865324543	0.5	45	standard ATAC-Seq in frozen liver
peak_63112	chr3	79818760	79818960	5.80008623961094	6.14469675851196	1.59161930628942	3.86065734075394	0.000113082395048736	0.00393777865324543	0	29.5	standard ATAC-Seq in frozen liver
peak_66660	chr3	153373638	153373838	5.80008623961094	6.14469675851196	1.59161930628942	3.86065734075394	0.000113082395048736	0.00393777865324543	0.5	30.5	standard ATAC-Seq in frozen liver
peak_65109	chr3	117210907	117211602	5.79563174999215	6.14398706296518	1.59161213935693	3.86022882776428	0.000113280892186592	0.00393827871571584	4	103	standard ATAC-Seq in frozen liver
peak_80392	chr6	4347585	4348002	5.79563174999215	6.14398706296518	1.59161213935693	3.86022882776428	0.000113280892186592	0.00393827871571584	1.5	63	standard ATAC-Seq in frozen liver
peak_104148	chrUn_random	3479532	3479773	5.79563174999215	6.14398706296518	1.59161213935693	3.86022882776428	0.000113280892186592	0.00393827871571584	1.5	35.5	standard ATAC-Seq in frozen liver
peak_20012	chr12	12268699	12269909	10.278302842642	3.39691443612764	0.880486185466136	3.85799856056718	0.000114319321141811	0.00395134459158439	37	282.5	standard ATAC-Seq in frozen liver
peak_27391	chr13	70420396	70420668	10.278302842642	3.39691443612764	0.880486185466136	3.85799856056718	0.000114319321141811	0.00395134459158439	8	66.5	standard ATAC-Seq in frozen liver
peak_27704	chr13	82339634	82340200	10.278302842642	3.39691443612764	0.880486185466136	3.85799856056718	0.000114319321141811	0.00395134459158439	14.5	135	standard ATAC-Seq in frozen liver
peak_55534	chr2	60850984	60851442	10.278302842642	3.39691443612764	0.880486185466136	3.85799856056718	0.000114319321141811	0.00395134459158439	13.5	107.5	standard ATAC-Seq in frozen liver
peak_82104	chr6	50840679	50841371	10.278302842642	3.39691443612764	0.880486185466136	3.85799856056718	0.000114319321141811	0.00395134459158439	22	166	standard ATAC-Seq in frozen liver
peak_27212	chr13	66622082	66622322	5.80454072922974	6.14541104398951	1.59290353006525	3.85799323562161	0.000114321811185462	0.00395134459158439	0.5	35.5	standard ATAC-Seq in frozen liver
peak_29257	chr14	5071848	5072468	5.80454072922974	6.14541104398951	1.59290353006525	3.85799323562161	0.000114321811185462	0.00395134459158439	3.5	95.5	standard ATAC-Seq in frozen liver
peak_65018	chr3	115840926	115841296	5.80454072922974	6.14541104398951	1.59290353006525	3.85799323562161	0.000114321811185462	0.00395134459158439	1.5	56	standard ATAC-Seq in frozen liver
peak_65604	chr3	129085709	129086143	5.80454072922974	6.14541104398951	1.59290353006525	3.85799323562161	0.000114321811185462	0.00395134459158439	1.5	65	standard ATAC-Seq in frozen liver
peak_73977	chr5	8863595	8863939	5.80454072922974	6.14541104398951	1.59290353006525	3.85799323562161	0.000114321811185462	0.00395134459158439	1	50.5	standard ATAC-Seq in frozen liver
peak_89395	chr7	78741720	78741926	5.80454072922974	6.14541104398951	1.59290353006525	3.85799323562161	0.000114321811185462	0.00395134459158439	1	30	standard ATAC-Seq in frozen liver
peak_92191	chr7	139652021	139652602	5.80454072922974	6.14541104398951	1.59290353006525	3.85799323562161	0.000114321811185462	0.00395134459158439	4	87	standard ATAC-Seq in frozen liver
peak_1217	chr1	51193682	51193903	5.79117726037336	6.14327321123213	1.59288260955912	3.85670178980262	0.00011492722828038	0.00396162151192636	0.5	32.5	standard ATAC-Seq in frozen liver
peak_14701	chr11	48933232	48933432	5.79117726037336	6.14327321123213	1.59288260955912	3.85670178980262	0.00011492722828038	0.00396162151192636	0	29	standard ATAC-Seq in frozen liver
peak_33883	chr15	10710040	10710264	5.79117726037336	6.14327321123213	1.59288260955912	3.85670178980262	0.00011492722828038	0.00396162151192636	0	33.5	standard ATAC-Seq in frozen liver
peak_53139	chr2	5999585	6000429	5.79117726037336	6.14327321123213	1.59288260955912	3.85670178980262	0.00011492722828038	0.00396162151192636	4	125.5	standard ATAC-Seq in frozen liver
peak_57904	chr2	124677776	124678102	5.79117726037336	6.14327321123213	1.59288260955912	3.85670178980262	0.00011492722828038	0.00396162151192636	2	48	standard ATAC-Seq in frozen liver
peak_4905	chr1	152883679	152884137	10.2827573322608	3.39733446390413	0.880903456373573	3.85664789861307	0.000114952557546896	0.00396162151192636	16.5	110	standard ATAC-Seq in frozen liver
peak_18129	chr11	101814016	101814683	10.2827573322608	3.39733446390413	0.880903456373573	3.85664789861307	0.000114952557546896	0.00396162151192636	21.5	163	standard ATAC-Seq in frozen liver
peak_44932	chr17	67696362	67696950	10.2827573322608	3.39733446390413	0.880903456373573	3.85664789861307	0.000114952557546896	0.00396162151192636	17.5	143.5	standard ATAC-Seq in frozen liver
peak_5931	chr1	171447629	171448365	10.2738483530232	3.39649439342321	0.880826211146133	3.85603238237391	0.000115242228558038	0.00396681949392811	24.5	173	standard ATAC-Seq in frozen liver
peak_10381	chr10	76669350	76669848	10.2738483530232	3.39649439342321	0.880826211146133	3.85603238237391	0.000115242228558038	0.00396681949392811	13	119	standard ATAC-Seq in frozen liver
peak_29483	chr14	13370068	13370412	10.2738483530232	3.39649439342321	0.880826211146133	3.85603238237391	0.000115242228558038	0.00396681949392811	12	80.5	standard ATAC-Seq in frozen liver
peak_32979	chr14	104284134	104284833	12.6680551684958	5.80341738450044	1.50626147102827	3.8528618676933	0.000116745257467034	0.00399241172574357	4	222	standard ATAC-Seq in frozen liver
peak_27676	chr13	81481021	81481346	11.7933679025038	-3.27513398458177	0.850066286894611	-3.85279834652214	0.000116775558665526	0.00399241172574357	123	10.5	FFPE-ATAC in frozen liver
peak_30876	chr14	44669324	44669535	5.80899521884853	6.1461386500971	1.59551510582016	3.85213441582413	0.000117092714531906	0.00399431078765442	1	31	standard ATAC-Seq in frozen liver
peak_66106	chr3	138544965	138545290	5.80899521884853	6.1461386500971	1.59551510582016	3.85213441582413	0.000117092714531906	0.00399431078765442	2	49.5	standard ATAC-Seq in frozen liver
peak_73105	chr4	146405777	146406091	5.80899521884853	6.1461386500971	1.59551510582016	3.85213441582413	0.000117092714531906	0.00399431078765442	2	45	standard ATAC-Seq in frozen liver
peak_104811	chrX	30445663	30446114	5.80899521884853	6.1461386500971	1.59551510582016	3.85213441582413	0.000117092714531906	0.00399431078765442	2	68	standard ATAC-Seq in frozen liver
peak_24020	chr12	116812569	116812982	10.2872118218796	3.39775781215469	0.882084530464077	3.8519639499483	0.000117174276055352	0.00399431078765442	15	102	standard ATAC-Seq in frozen liver
peak_27963	chr13	94928817	94929606	10.2872118218796	3.39775781215469	0.882084530464077	3.8519639499483	0.000117174276055352	0.00399431078765442	28.5	190.5	standard ATAC-Seq in frozen liver
peak_71762	chr4	129849673	129849978	10.2872118218796	3.39775781215469	0.882084530464077	3.8519639499483	0.000117174276055352	0.00399431078765442	11.5	73	standard ATAC-Seq in frozen liver
peak_466	chr1	21622822	21623068	10.2718001524814	3.39858864114758	0.882681261712332	3.8503011093207	0.000117972698055372	0.00401396193361228	8	57.5	standard ATAC-Seq in frozen liver
peak_78594	chr5	123948053	123948613	10.2848055328026	3.39523724510066	0.882075222049089	3.84914705711086	0.000118529835307856	0.00402523406096755	16	134.5	standard ATAC-Seq in frozen liver
peak_1842	chr1	63484193	63484480	9.83265632187462	4.39693254109077	1.14303801703776	3.84670717469717	0.000119715905702303	0.00404887412001917	5	68	standard ATAC-Seq in frozen liver
peak_2640	chr1	87420754	87420977	9.83265632187462	4.39693254109077	1.14303801703776	3.84670717469717	0.000119715905702303	0.00404887412001917	4.5	53	standard ATAC-Seq in frozen liver
peak_40742	chr16	72721318	72721696	9.83265632187462	4.39693254109077	1.14303801703776	3.84670717469717	0.000119715905702303	0.00404887412001917	4	88	standard ATAC-Seq in frozen liver
peak_51933	chr19	44101318	44101885	11.7978223921226	-3.27435114914834	0.851272075710541	-3.84642142339193	0.000119855544265154	0.00405007353360481	211.5	16.5	FFPE-ATAC in frozen liver
peak_40963	chr16	84796872	84797460	9.83711081149341	4.39736148885865	1.14337796789883	3.84593862425006	0.000120091823518953	0.00405638013748998	9.5	140	standard ATAC-Seq in frozen liver
peak_64415	chr3	101234255	101235109	9.82820183225583	4.39650368090202	1.14331133409173	3.84541248722482	0.000120349812152636	0.00406124599614728	13	205.5	standard ATAC-Seq in frozen liver
peak_71763	chr4	129854381	129854679	9.82820183225583	4.39650368090202	1.14331133409173	3.84541248722482	0.000120349812152636	0.00406124599614728	5.5	71.5	standard ATAC-Seq in frozen liver
peak_28980	chr13	113553894	113554229	9.8415653011122	4.39779379923057	1.14433683035568	3.84309381868244	0.000121492998011284	0.00408476363090688	5.5	79.5	standard ATAC-Seq in frozen liver
peak_39955	chr16	38651873	38652370	9.8415653011122	4.39779379923057	1.14433683035568	3.84309381868244	0.000121492998011284	0.00408476363090688	9.5	118.5	standard ATAC-Seq in frozen liver
peak_44581	chr17	56418128	56418340	11.7913197019619	-3.27377420940578	0.85188154561397	-3.84299228720385	0.000121543289852586	0.00408476363090688	79	6	FFPE-ATAC in frozen liver
peak_64306	chr3	98423422	98423770	11.7913197019619	-3.27377420940578	0.85188154561397	-3.84299228720385	0.000121543289852586	0.00408476363090688	131	9.5	FFPE-ATAC in frozen liver
peak_63119	chr3	79903611	79903998	5.81344970846732	6.14688828272605	1.59957047535002	3.84283679741024	0.00012162034704802	0.00408478589603273	1.5	58	standard ATAC-Seq in frozen liver
peak_73143	chr4	146873302	146873683	5.81344970846732	6.14688828272605	1.59957047535002	3.84283679741024	0.00012162034704802	0.00408478589603273	2	57.5	standard ATAC-Seq in frozen liver
peak_54256	chr2	30540539	30541145	10.2649393737856	3.39564103014482	0.883784366483289	3.84216010027038	0.000121956239438062	0.00409092794519036	19.5	144.5	standard ATAC-Seq in frozen liver
peak_106461	chrX	145312159	145312565	10.2649393737856	3.39564103014482	0.883784366483289	3.84216010027038	0.000121956239438062	0.00409092794519036	12	96.5	standard ATAC-Seq in frozen liver
peak_26262	chr13	48412730	48413221	9.82374734263704	4.39607162024598	1.14420329667228	3.8420371913201	0.000122017341570882	0.0040916941016772	7	118	standard ATAC-Seq in frozen liver
peak_56773	chr2	93107876	93108394	10.7761905263167	3.11775905126727	0.811676571197444	3.84113471042748	0.00012246687966704	0.00410166675634919	20.5	127	standard ATAC-Seq in frozen liver
peak_49935	chr19	8032476	8032802	10.7717360366979	3.11735587069761	0.81164319584354	3.84079591458626	0.000122636041257359	0.00410166675634919	13	78.5	standard ATAC-Seq in frozen liver
peak_27434	chr13	73603831	73604252	9.78486964858602	3.76820174455206	0.981120419629082	3.84071279035926	0.000122677579027287	0.00410166675634919	9.5	97.5	standard ATAC-Seq in frozen liver
peak_85960	chr6	136279088	136279300	9.78486964858602	3.76820174455206	0.981120419629082	3.84071279035926	0.000122677579027287	0.00410166675634919	5	49.5	standard ATAC-Seq in frozen liver
peak_92187	chr7	139615120	139615754	9.78486964858602	3.76820174455206	0.981120419629082	3.84071279035926	0.000122677579027287	0.00410166675634919	14.5	148	standard ATAC-Seq in frozen liver
peak_8254	chr10	22096267	22096655	9.77391246880662	3.76957966704342	0.981499171690686	3.84063458815774	0.000122716669334376	0.00410166675634919	8	90.5	standard ATAC-Seq in frozen liver
peak_9372	chr10	56160901	56161142	9.77391246880662	3.76957966704342	0.981499171690686	3.84063458815774	0.000122716669334376	0.00410166675634919	5.5	56	standard ATAC-Seq in frozen liver
peak_62611	chr3	60757958	60758492	9.77391246880662	3.76957966704342	0.981499171690686	3.84063458815774	0.000122716669334376	0.00410166675634919	13.5	123.5	standard ATAC-Seq in frozen liver
peak_29929	chr14	22833924	22834437	9.78041515896723	3.76776451927869	0.981081303917441	3.84042026306491	0.000122823862499333	0.00410166675634919	12	118	standard ATAC-Seq in frozen liver
peak_103636	chr9	118520241	118520750	9.78041515896723	3.76776451927869	0.981081303917441	3.84042026306491	0.000122823862499333	0.00410166675634919	13.5	119	standard ATAC-Seq in frozen liver
peak_56688	chr2	91824589	91825225	10.7826932164773	3.11624230597089	0.811444384621946	3.84036462021086	0.000122851706305337	0.00410166675634919	29	157.5	standard ATAC-Seq in frozen liver
peak_47336	chr18	38157052	38157446	10.7782387268585	3.1158395533179	0.811411118568896	3.84002570585103	0.000123021428337966	0.00410605134988569	14.5	96.5	standard ATAC-Seq in frozen liver
peak_50285	chr19	12776157	12776814	11.3019829089896	-3.66109121266216	0.953617368294789	-3.83916163272985	0.000123455140883618	0.00411409811619938	244	13	FFPE-ATAC in frozen liver
peak_27154	chr13	65762102	65762575	9.7828214480442	3.77046290904112	0.982325758420153	3.83830198559086	0.000123888061942573	0.00411409811619938	13.5	108.5	standard ATAC-Seq in frozen liver
peak_27218	chr13	66691118	66691421	9.7828214480442	3.77046290904112	0.982325758420153	3.83830198559086	0.000123888061942573	0.00411409811619938	7.5	71.5	standard ATAC-Seq in frozen liver
peak_501	chr1	23209297	23209935	9.846019790731	4.39823269974816	1.14593139991089	3.83812914114245	0.000123975279585353	0.00411409811619938	12	153.5	standard ATAC-Seq in frozen liver
peak_46055	chr18	3117875	3118239	9.846019790731	4.39823269974816	1.14593139991089	3.83812914114245	0.000123975279585353	0.00411409811619938	6	89	standard ATAC-Seq in frozen liver
peak_67338	chr4	20118896	20119220	9.846019790731	4.39823269974816	1.14593139991089	3.83812914114245	0.000123975279585353	0.00411409811619938	5	76.5	standard ATAC-Seq in frozen liver
peak_72397	chr4	136736084	136736320	9.846019790731	4.39823269974816	1.14593139991089	3.83812914114245	0.000123975279585353	0.00411409811619938	3	57	standard ATAC-Seq in frozen liver
peak_74640	chr5	30833482	30833783	9.846019790731	4.39823269974816	1.14593139991089	3.83812914114245	0.000123975279585353	0.00411409811619938	3.5	72.5	standard ATAC-Seq in frozen liver
peak_94869	chr8	63679084	63679760	9.846019790731	4.39823269974816	1.14593139991089	3.83812914114245	0.000123975279585353	0.00411409811619938	11	166	standard ATAC-Seq in frozen liver
peak_58556	chr2	135536826	135537222	9.78932413820481	3.76863513448441	0.981905861515773	3.83808192026347	0.000123999117396918	0.00411409811619938	9.5	93.5	standard ATAC-Seq in frozen liver
peak_74997	chr5	36065288	36065717	10.7806450159355	3.11816795091316	0.812469053068307	3.83789134999952	0.000124095364050786	0.00411492531355876	16	107	standard ATAC-Seq in frozen liver
peak_43931	chr17	43511046	43511402	9.76945797918783	3.76914562695902	0.982207868636159	3.83742153500832	0.000124332942896118	0.00411897167917222	7.5	82	standard ATAC-Seq in frozen liver
peak_15108	chr11	54698138	54698894	10.7871477060961	3.11664240991841	0.812236237504694	3.8371132264342	0.000124489083147486	0.00412031509214143	28.5	191.5	standard ATAC-Seq in frozen liver
peak_86893	chr7	4787800	4788335	10.7871477060961	3.11664240991841	0.812236237504694	3.8371132264342	0.000124489083147486	0.00412031509214143	21	129.5	standard ATAC-Seq in frozen liver
peak_24131	chr12	118989989	118990563	10.7672815470791	3.11695521373875	0.81236888139855	3.83687175261157	0.000124611504566862	0.00412181555424549	22	140	standard ATAC-Seq in frozen liver
peak_89066	chr7	72566398	72566685	10.7737842372397	3.11543095356076	0.812136394152065	3.83609326708417	0.000125006951123429	0.00412978632875761	11.5	70	standard ATAC-Seq in frozen liver
peak_14353	chr11	34444699	34445048	12.3674669520304	5.76919360718753	1.50444930499862	3.83475441014798	0.000125689816979074	0.00414466337894702	2.5	109	standard ATAC-Seq in frozen liver
peak_69726	chr4	88910523	88910883	12.3630124624116	5.76887006122245	1.50457023407	3.83423115158748	0.000125957652311613	0.00415205995545374	4	111	standard ATAC-Seq in frozen liver
peak_23432	chr12	106674226	106674543	12.376375931268	5.769848665474	1.50501261851324	3.83375434497943	0.000126202179091957	0.00415643203877882	2.5	99	standard ATAC-Seq in frozen liver
peak_11545	chr10	94260896	94261257	9.787275937663	3.77091923431311	0.983875259414971	3.83272086397961	0.000126733729090614	0.00416583590321265	9.5	85.5	standard ATAC-Seq in frozen liver
peak_11415	chr10	92839158	92839426	9.7937786278236	3.76906811692694	0.983451658750493	3.83248946035199	0.000126853035646894	0.00416583590321265	6	61.5	standard ATAC-Seq in frozen liver
peak_21839	chr12	76866777	76867191	9.7937786278236	3.76906811692694	0.983451658750493	3.83248946035199	0.000126853035646894	0.00416583590321265	8.5	98.5	standard ATAC-Seq in frozen liver
peak_32692	chr14	80020973	80021585	9.7937786278236	3.76906811692694	0.983451658750493	3.83248946035199	0.000126853035646894	0.00416583590321265	13.5	141.5	standard ATAC-Seq in frozen liver
peak_37307	chr15	97550558	97551059	9.7937786278236	3.76906811692694	0.983451658750493	3.83248946035199	0.000126853035646894	0.00416583590321265	14.5	117.5	standard ATAC-Seq in frozen liver
peak_73035	chr4	145019748	145019958	9.7937786278236	3.76906811692694	0.983451658750493	3.83248946035199	0.000126853035646894	0.00416583590321265	4.5	50	standard ATAC-Seq in frozen liver
peak_85959	chr6	136277015	136277241	9.7937786278236	3.76906811692694	0.983451658750493	3.83248946035199	0.000126853035646894	0.00416583590321265	5.5	53	standard ATAC-Seq in frozen liver
peak_57892	chr2	124515918	124516491	10.2961208011171	3.39862741012593	0.88680454131855	3.83244249637317	0.000126877262147239	0.00416583590321265	19	139	standard ATAC-Seq in frozen liver
peak_88106	chr7	31953384	31953973	10.2961208011171	3.39862741012593	0.88680454131855	3.83244249637317	0.000126877262147239	0.00416583590321265	15.5	144.5	standard ATAC-Seq in frozen liver
peak_1866	chr1	64347945	64348727	10.7850995055543	3.11858550764302	0.814000932981499	3.83118173614415	0.000127529261102628	0.00418210722264763	32	190	standard ATAC-Seq in frozen liver
peak_23007	chr12	101677121	101677842	10.7850995055543	3.11858550764302	0.814000932981499	3.83118173614415	0.000127529261102628	0.00418210722264763	28.5	181	standard ATAC-Seq in frozen liver
peak_9252	chr10	52013846	52014398	9.85047428034978	4.39868133462884	1.1481901370575	3.83096944718707	0.000127639355946267	0.00418315203356966	10	135	standard ATAC-Seq in frozen liver
peak_8648	chr10	33590638	33591596	12.3561516837159	5.76713357711024	1.50635940590043	3.82852429142759	0.00012891390905691	0.0042170003802256	7.5	293	standard ATAC-Seq in frozen liver
peak_29975	chr14	25625965	25626167	5.77781379151699	6.14101946544551	1.60511723126293	3.825900903583	0.000130294699692629	0.00425458189655492	1	29.5	standard ATAC-Seq in frozen liver
peak_2614	chr1	85071576	85071900	9.79823311744239	3.7695041679855	0.985786141144039	3.82385591626482	0.000131380709730064	0.00428475807191928	8	74	standard ATAC-Seq in frozen liver
peak_92269	chr7	140507172	140507683	9.85492876996858	4.39914277657781	1.15116028217284	3.82148589097805	0.000132650004336583	0.00431562482925154	11	123.5	standard ATAC-Seq in frozen liver
peak_31992	chr14	66338623	66339836	11.2411908553798	-4.27512577024093	1.120883009068	-3.81406956449064	0.00013669696238731	0.00441840171160654	450.5	18	FFPE-ATAC in frozen liver
peak_104358	chrX	4782074	4782310	10.256030394548	3.39474770528907	0.890068090037071	3.81403146937633	0.000136718047332648	0.00441840171160654	7.5	55.5	standard ATAC-Seq in frozen liver
peak_83221	chr6	84588217	84588540	10.8005111749525	3.11785748725681	0.8193337807394	3.80535693822258	0.000141599840531568	0.0045242143252481	11	80	standard ATAC-Seq in frozen liver
peak_8653	chr10	33611634	33611883	12.1134718322948	5.73645418100615	1.50834210301383	3.8031519305495	0.000142866675632466	0.00454838327640972	1.5	74.5	standard ATAC-Seq in frozen liver
peak_64309	chr3	98439480	98440609	11.5737959872004	-3.24503748655442	0.853349319855213	-3.80270706386103	0.000143123553903162	0.00455249545831357	410	38	FFPE-ATAC in frozen liver
peak_64311	chr3	98448831	98449843	11.5737959872004	-3.24503748655442	0.853349319855213	-3.80270706386103	0.000143123553903162	0.00455249545831357	374	29.5	FFPE-ATAC in frozen liver
peak_25296	chr13	32328120	32328651	5.52177047123957	6.07395256882987	1.59849944115595	3.79978398017925	0.000144822272278169	0.00458335275973813	2.5	77	standard ATAC-Seq in frozen liver
peak_47734	chr18	46586613	46586975	5.52177047123957	6.07395256882987	1.59849944115595	3.79978398017925	0.000144822272278169	0.00458335275973813	2	52	standard ATAC-Seq in frozen liver
peak_63183	chr3	81933574	81933784	5.52177047123957	6.07395256882987	1.59849944115595	3.79978398017925	0.000144822272278169	0.00458335275973813	1	29	standard ATAC-Seq in frozen liver
peak_66656	chr3	153187284	153188057	5.52177047123957	6.07395256882987	1.59849944115595	3.79978398017925	0.000144822272278169	0.00458335275973813	2.5	109	standard ATAC-Seq in frozen liver
peak_73111	chr4	146545682	146545987	5.52177047123957	6.07395256882987	1.59849944115595	3.79978398017925	0.000144822272278169	0.00458335275973813	2	42.5	standard ATAC-Seq in frozen liver
peak_78213	chr5	119775770	119776238	5.52177047123957	6.07395256882987	1.59849944115595	3.79978398017925	0.000144822272278169	0.00458335275973813	1	64	standard ATAC-Seq in frozen liver
peak_78985	chr5	131651140	131651495	5.52177047123957	6.07395256882987	1.59849944115595	3.79978398017925	0.000144822272278169	0.00458335275973813	2	48.5	standard ATAC-Seq in frozen liver
peak_92258	chr7	140229181	140229551	5.52177047123957	6.07395256882987	1.59849944115595	3.79978398017925	0.000144822272278169	0.00458335275973813	2	52.5	standard ATAC-Seq in frozen liver
peak_102795	chr9	102715984	102716334	5.52177047123957	6.07395256882987	1.59849944115595	3.79978398017925	0.000144822272278169	0.00458335275973813	2.5	50.5	standard ATAC-Seq in frozen liver
peak_8346	chr10	24173404	24173625	5.52622496085836	6.07469898818392	1.59919621729885	3.79859514578174	0.000145518566746752	0.00459315525659118	0.5	31	standard ATAC-Seq in frozen liver
peak_23870	chr12	114021935	114022860	5.52622496085836	6.07469898818392	1.59919621729885	3.79859514578174	0.000145518566746752	0.00459315525659118	5.5	131	standard ATAC-Seq in frozen liver
peak_27626	chr13	78622479	78623195	5.52622496085836	6.07469898818392	1.59919621729885	3.79859514578174	0.000145518566746752	0.00459315525659118	5.5	105	standard ATAC-Seq in frozen liver
peak_46937	chr18	31602241	31602726	5.52622496085836	6.07469898818392	1.59919621729885	3.79859514578174	0.000145518566746752	0.00459315525659118	3	68.5	standard ATAC-Seq in frozen liver
peak_74937	chr5	35038116	35038464	5.52622496085836	6.07469898818392	1.59919621729885	3.79859514578174	0.000145518566746752	0.00459315525659118	0.5	49	standard ATAC-Seq in frozen liver
peak_94070	chr8	35625289	35625758	5.52622496085836	6.07469898818392	1.59919621729885	3.79859514578174	0.000145518566746752	0.00459315525659118	1.5	66	standard ATAC-Seq in frozen liver
peak_95647	chr8	80559231	80559431	5.52622496085836	6.07469898818392	1.59919621729885	3.79859514578174	0.000145518566746752	0.00459315525659118	1	28	standard ATAC-Seq in frozen liver
peak_14040	chr11	23125281	23125503	5.51731598162078	6.07320632580047	1.59920306326011	3.79764550564312	0.00014607702984195	0.00460312983844406	0.5	31	standard ATAC-Seq in frozen liver
peak_27171	chr13	66031137	66031340	5.51731598162078	6.07320632580047	1.59920306326011	3.79764550564312	0.00014607702984195	0.00460312983844406	0	28.5	standard ATAC-Seq in frozen liver
peak_89309	chr7	76617095	76617538	5.51731598162078	6.07320632580047	1.59920306326011	3.79764550564312	0.00014607702984195	0.00460312983844406	2	64	standard ATAC-Seq in frozen liver
peak_35325	chr15	60533966	60534513	9.55879504312204	4.35408378512262	1.14659615998107	3.79739958765821	0.000146221977587171	0.00460312983844406	10	126	standard ATAC-Seq in frozen liver
peak_51378	chr19	37614713	37615080	9.55879504312204	4.35408378512262	1.14659615998107	3.79739958765821	0.000146221977587171	0.00460312983844406	6	86	standard ATAC-Seq in frozen liver
peak_73043	chr4	145149107	145149630	9.55879504312204	4.35408378512262	1.14659615998107	3.79739958765821	0.000146221977587171	0.00460312983844406	6.5	119	standard ATAC-Seq in frozen liver
peak_102482	chr9	95050432	95050900	9.55879504312204	4.35408378512262	1.14659615998107	3.79739958765821	0.000146221977587171	0.00460312983844406	7	108	standard ATAC-Seq in frozen liver
peak_5591	chr1	164880678	164882037	9.55434055350325	4.35364240840891	1.14656240018166	3.79712644311301	0.000146383131822318	0.00460421547568313	19.5	316	standard ATAC-Seq in frozen liver
peak_29270	chr14	7469512	7470040	9.55434055350325	4.35364240840891	1.14656240018166	3.79712644311301	0.000146383131822318	0.00460421547568313	7	122	standard ATAC-Seq in frozen liver
peak_70856	chr4	114998508	114999072	11.5782504768192	-3.24423598349105	0.854621359836966	-3.79610917296748	0.000146984789778769	0.00461762821214799	207	16.5	FFPE-ATAC in frozen liver
peak_26588	chr13	54764365	54764911	11.5607906068792	-3.24386912411883	0.85460292405636	-3.79576178925513	0.000147190780448181	0.00462153636281692	200	16	FFPE-ATAC in frozen liver
peak_29093	chr13	115240846	115242181	9.56324953274083	4.35452699011923	1.14728073104644	3.79552002599003	0.000147334300966985	0.00462317570748488	16.5	311	standard ATAC-Seq in frozen liver
peak_73049	chr4	145184275	145184525	9.54988606388446	4.35319936841089	1.14717931131095	3.79469828778228	0.000147823103900534	0.00463443415655795	4.5	57.5	standard ATAC-Seq in frozen liver
peak_1845	chr1	63613642	63613953	5.53067945047715	6.07545531186448	1.60132253819803	3.79402348180348	0.00014822564698337	0.00463482528150718	2	45	standard ATAC-Seq in frozen liver
peak_5011	chr1	154336398	154336639	5.53067945047715	6.07545531186448	1.60132253819803	3.79402348180348	0.00014822564698337	0.00463482528150718	1	35	standard ATAC-Seq in frozen liver
peak_58550	chr2	135386274	135386543	5.53067945047715	6.07545531186448	1.60132253819803	3.79402348180348	0.00014822564698337	0.00463482528150718	1.5	37.5	standard ATAC-Seq in frozen liver
peak_71752	chr4	129636889	129637134	5.53067945047715	6.07545531186448	1.60132253819803	3.79402348180348	0.00014822564698337	0.00463482528150718	1.5	34	standard ATAC-Seq in frozen liver
peak_95643	chr8	80485694	80486110	5.53067945047715	6.07545531186448	1.60132253819803	3.79402348180348	0.00014822564698337	0.00463482528150718	2.5	57.5	standard ATAC-Seq in frozen liver
peak_104373	chrX	5981117	5981349	5.53067945047715	6.07545531186448	1.60132253819803	3.79402348180348	0.00014822564698337	0.00463482528150718	0.5	32.5	standard ATAC-Seq in frozen liver
peak_52995	chr2	4430372	4430582	9.75164002071267	3.76738135067975	0.993001947045543	3.79393148411114	0.000148280606390139	0.00463518847318183	6	49	standard ATAC-Seq in frozen liver
peak_14963	chr11	52557475	52557755	5.51286149200199	6.07245052718047	1.60133806407557	3.79211027540647	0.000149372553545229	0.00466386905213818	1	40.5	standard ATAC-Seq in frozen liver
peak_35341	chr15	60838083	60838292	5.51286149200199	6.07245052718047	1.60133806407557	3.79211027540647	0.000149372553545229	0.00466386905213818	1	30.5	standard ATAC-Seq in frozen liver
peak_101615	chr9	70825276	70825500	5.51286149200199	6.07245052718047	1.60133806407557	3.79211027540647	0.000149372553545229	0.00466386905213818	0	31	standard ATAC-Seq in frozen liver
peak_12632	chr10	121445739	121446150	9.56770402235962	4.35497548310265	1.14862848448904	3.79145697839797	0.0001497660942441	0.00467235085614021	6	97	standard ATAC-Seq in frozen liver
peak_4181	chr1	134285410	134285884	10.0044415638894	3.35406063948358	0.884937977560738	3.79016464942412	0.000150547459579114	0.00468438132261438	15.5	109.5	standard ATAC-Seq in frozen liver
peak_34505	chr15	36805810	36806360	10.0044415638894	3.35406063948358	0.884937977560738	3.79016464942412	0.000150547459579114	0.00468438132261438	18.5	126	standard ATAC-Seq in frozen liver
peak_37601	chr15	100638449	100639260	10.0044415638894	3.35406063948358	0.884937977560738	3.79016464942412	0.000150547459579114	0.00468438132261438	23	187	standard ATAC-Seq in frozen liver
peak_60163	chr2	167079631	167080139	10.0044415638894	3.35406063948358	0.884937977560738	3.79016464942412	0.000150547459579114	0.00468438132261438	16.5	116.5	standard ATAC-Seq in frozen liver
peak_66165	chr3	142250355	142250659	10.0044415638894	3.35406063948358	0.884937977560738	3.79016464942412	0.000150547459579114	0.00468438132261438	8.5	71.5	standard ATAC-Seq in frozen liver
peak_71439	chr4	124382327	124382688	10.0044415638894	3.35406063948358	0.884937977560738	3.79016464942412	0.000150547459579114	0.00468438132261438	12	84	standard ATAC-Seq in frozen liver
peak_92182	chr7	139530063	139530482	10.0044415638894	3.35406063948358	0.884937977560738	3.79016464942412	0.000150547459579114	0.00468438132261438	13.5	95.5	standard ATAC-Seq in frozen liver
peak_44295	chr17	48156603	48156943	9.54543157426567	4.35275117733522	1.14845901516819	3.79007968055156	0.000150598967515577	0.00468438132261438	6	77	standard ATAC-Seq in frozen liver
peak_32092	chr14	67466082	67466903	9.9999870742706	3.35362837014085	0.884895674562388	3.78985734312616	0.000150733826470732	0.0046844884245724	30	189	standard ATAC-Seq in frozen liver
peak_62502	chr3	58945344	58945908	9.9999870742706	3.35362837014085	0.884895674562388	3.78985734312616	0.000150733826470732	0.0046844884245724	16	130	standard ATAC-Seq in frozen liver
peak_5039	chr1	154524712	154525280	10.0088960535082	3.35449467136539	0.885782401075421	3.78704145317488	0.000152451674349843	0.0047241465092141	20	133	standard ATAC-Seq in frozen liver
peak_49490	chr19	3645388	3646252	10.0088960535082	3.35449467136539	0.885782401075421	3.78704145317488	0.000152451674349843	0.0047241465092141	32	201	standard ATAC-Seq in frozen liver
peak_64639	chr3	104822752	104823670	10.0088960535082	3.35449467136539	0.885782401075421	3.78704145317488	0.000152451674349843	0.0047241465092141	31	209.5	standard ATAC-Seq in frozen liver
peak_76229	chr5	76366305	76366778	10.0088960535082	3.35449467136539	0.885782401075421	3.78704145317488	0.000152451674349843	0.0047241465092141	13	109.5	standard ATAC-Seq in frozen liver
peak_55402	chr2	59239809	59240381	9.99553258465181	3.35319430818494	0.885655349495511	3.78611647306709	0.000153019972681173	0.00473324107807609	17	134	standard ATAC-Seq in frozen liver
peak_35357	chr15	61230411	61230800	5.53513394009594	6.07623095613428	1.60495669744316	3.78591582303389	0.000153143512938622	0.00473324107807609	1	54.5	standard ATAC-Seq in frozen liver
peak_106454	chrX	144615585	144615829	5.53513394009594	6.07623095613428	1.60495669744316	3.78591582303389	0.000153143512938622	0.00473324107807609	1	34.5	standard ATAC-Seq in frozen liver
peak_11553	chr10	94376125	94376528	9.57215851197841	4.35543265520857	1.150664402295	3.78514590919965	0.000153618420839061	0.00473703303380555	4.5	95	standard ATAC-Seq in frozen liver
peak_26084	chr13	45369886	45370798	9.57215851197841	4.35543265520857	1.150664402295	3.78514590919965	0.000153618420839061	0.00473703303380555	18.5	213	standard ATAC-Seq in frozen liver
peak_104355	chrX	4754260	4754549	9.57215851197841	4.35543265520857	1.150664402295	3.78514590919965	0.000153618420839061	0.00473703303380555	4	66.5	standard ATAC-Seq in frozen liver
peak_1381	chr1	54467352	54467566	5.5084070023832	6.07167544837277	1.60500893310942	3.78295430207355	0.000154977876150367	0.00476514637655091	0.5	30	standard ATAC-Seq in frozen liver
peak_20346	chr12	24432563	24432763	5.5084070023832	6.07167544837277	1.60500893310942	3.78295430207355	0.000154977876150367	0.00476514637655091	0	27.5	standard ATAC-Seq in frozen liver
peak_23965	chr12	116395405	116395629	5.5084070023832	6.07167544837277	1.60500893310942	3.78295430207355	0.000154977876150367	0.00476514637655091	0.5	31.5	standard ATAC-Seq in frozen liver
peak_81328	chr6	31495721	31496043	5.5084070023832	6.07167544837277	1.60500893310942	3.78295430207355	0.000154977876150367	0.00476514637655091	1	44	standard ATAC-Seq in frozen liver
peak_40445	chr16	55898669	55899017	10.0064897644312	3.35190612746858	0.88657796385153	3.78072348302794	0.000156373278481511	0.00478466438556059	12.5	82.5	standard ATAC-Seq in frozen liver
peak_54283	chr2	30767828	30768311	10.013350543127	3.35493398885517	0.887443224528562	3.78044915564871	0.000156545687508385	0.00478583169710096	15.5	111	standard ATAC-Seq in frozen liver
peak_99050	chr9	21662535	21662907	10.013350543127	3.35493398885517	0.887443224528562	3.78044915564871	0.000156545687508385	0.00478583169710096	10.5	89	standard ATAC-Seq in frozen liver
peak_1025	chr1	40174457	40174819	9.50005119005404	3.72542611219098	0.985541476254927	3.78008049579776	0.000156777664300125	0.00478608239868428	9.5	82	standard ATAC-Seq in frozen liver
peak_22446	chr12	85288015	85288730	9.50005119005404	3.72542611219098	0.985541476254927	3.78008049579776	0.000156777664300125	0.00478608239868428	22.5	157.5	standard ATAC-Seq in frozen liver
peak_56702	chr2	92008132	92008471	9.50005119005404	3.72542611219098	0.985541476254927	3.78008049579776	0.000156777664300125	0.00478608239868428	10	76	standard ATAC-Seq in frozen liver
peak_57444	chr2	114608099	114608683	9.50005119005404	3.72542611219098	0.985541476254927	3.78008049579776	0.000156777664300125	0.00478608239868428	15.5	131	standard ATAC-Seq in frozen liver
peak_57478	chr2	115735920	115736316	9.50005119005404	3.72542611219098	0.985541476254927	3.78008049579776	0.000156777664300125	0.00478608239868428	10	89.5	standard ATAC-Seq in frozen liver
peak_38475	chr16	16907912	16908300	9.50655388021464	3.7235652815986	0.985116643436626	3.77982171594296	0.000156940693039559	0.00478695971847046	8	86.5	standard ATAC-Seq in frozen liver
peak_47372	chr18	38437473	38437795	9.50655388021464	3.7235652815986	0.985116643436626	3.77982171594296	0.000156940693039559	0.00478695971847046	5.5	72.5	standard ATAC-Seq in frozen liver
peak_53898	chr2	26431530	26432116	9.50655388021464	3.7235652815986	0.985116643436626	3.77982171594296	0.000156940693039559	0.00478695971847046	16	131.5	standard ATAC-Seq in frozen liver
peak_376	chr1	19166220	19166563	9.99107809503302	3.35275490086283	0.887231073408877	3.7788970667822	0.000157524517335771	0.00479247847003999	9	81	standard ATAC-Seq in frozen liver
peak_14189	chr11	30163713	30163963	9.50450567967283	3.72588089289578	0.985976215710195	3.7788750210491	0.00015753846194688	0.00479247847003999	4.5	56	standard ATAC-Seq in frozen liver
peak_45250	chr17	75839913	75840302	9.50450567967283	3.72588089289578	0.985976215710195	3.7788750210491	0.00015753846194688	0.00479247847003999	9.5	88.5	standard ATAC-Seq in frozen liver
peak_66410	chr3	146511192	146511410	9.50450567967283	3.72588089289578	0.985976215710195	3.7788750210491	0.00015753846194688	0.00479247847003999	4.5	49.5	standard ATAC-Seq in frozen liver
peak_28833	chr13	111693194	111693892	9.51100836983343	3.72401344255368	0.985550343447003	3.77861310415538	0.000157704221435311	0.00479247847003999	18	158	standard ATAC-Seq in frozen liver
peak_30807	chr14	42767278	42767488	9.51100836983343	3.72401344255368	0.985550343447003	3.77861310415538	0.000157704221435311	0.00479247847003999	4	47.5	standard ATAC-Seq in frozen liver
peak_36840	chr15	85999004	85999333	9.51100836983343	3.72401344255368	0.985550343447003	3.77861310415538	0.000157704221435311	0.00479247847003999	9	73.5	standard ATAC-Seq in frozen liver
peak_60149	chr2	166946631	166947131	9.51100836983343	3.72401344255368	0.985550343447003	3.77861310415538	0.000157704221435311	0.00479247847003999	12.5	113	standard ATAC-Seq in frozen liver
peak_18102	chr11	101534579	101534968	9.49559670043525	3.72497726519356	0.985896803575199	3.77826284828749	0.00015792614458795	0.0047958947198208	11.5	89.5	standard ATAC-Seq in frozen liver
peak_23975	chr12	116489323	116489528	9.49559670043525	3.72497726519356	0.985896803575199	3.77826284828749	0.00015792614458795	0.0047958947198208	5.5	45.5	standard ATAC-Seq in frozen liver
peak_53347	chr2	11944984	11945807	9.50896016929162	3.72634540259962	0.987208869047529	3.77462715280794	0.000160247156432515	0.00485711201150692	19.5	187	standard ATAC-Seq in frozen liver
peak_81405	chr6	34317963	34318346	9.50896016929162	3.72634540259962	0.987208869047529	3.77462715280794	0.000160247156432515	0.00485711201150692	8.5	87	standard ATAC-Seq in frozen liver
peak_27155	chr13	65762684	65762963	9.51546285945222	3.72445940419776	0.986780105880213	3.77435599076608	0.000160421545223374	0.00485711201150692	7	62	standard ATAC-Seq in frozen liver
peak_78045	chr5	116316173	116316867	9.51546285945222	3.72445940419776	0.986780105880213	3.77435599076608	0.000160421545223374	0.00485711201150692	17	157	standard ATAC-Seq in frozen liver
peak_105099	chrX	47902975	47903923	9.51546285945222	3.72445940419776	0.986780105880213	3.77435599076608	0.000160421545223374	0.00485711201150692	18	210	standard ATAC-Seq in frozen liver
peak_105440	chrX	71093470	71093787	9.53652259502808	4.35182562616888	1.15311973606215	3.77395815028729	0.000160677726251335	0.00485873542139594	6	72.5	standard ATAC-Seq in frozen liver
peak_722	chr1	35872906	35873211	5.53958842971473	6.07703557885876	1.61027145229196	3.77391996250639	0.000160702336710437	0.00485873542139594	1.5	43.5	standard ATAC-Seq in frozen liver
peak_88730	chr7	55241537	55241749	5.53958842971473	6.07703557885876	1.61027145229196	3.77391996250639	0.000160702336710437	0.00485873542139594	0.5	31	standard ATAC-Seq in frozen liver
peak_14482	chr11	43383165	43383578	9.49114221081646	3.72453063876341	0.987049691004567	3.77339729975781	0.000161039528123623	0.00486343013216948	11.5	92	standard ATAC-Seq in frozen liver
peak_33490	chr14	124965662	124966165	9.49114221081646	3.72453063876341	0.987049691004567	3.77339729975781	0.000161039528123623	0.00486343013216948	8.5	114	standard ATAC-Seq in frozen liver
peak_9056	chr10	43144277	43144749	9.49764490097706	3.7226474474024	0.986621393959942	3.77312662201763	0.000161214415117606	0.00486459038890001	11	106	standard ATAC-Seq in frozen liver
peak_92984	chr8	3720537	3720839	9.49764490097706	3.7226474474024	0.986621393959942	3.77312662201763	0.000161214415117606	0.00486459038890001	7	68.5	standard ATAC-Seq in frozen liver
peak_41579	chr16	96046517	96047142	10.0068478529664	3.35669170312603	0.889798266599614	3.77241879325491	0.00016167259389643	0.0048660584066114	19	147.5	standard ATAC-Seq in frozen liver
peak_4996	chr1	154015301	154015892	10.0178050327458	3.35538190716887	0.889919836424547	3.77043163870789	0.000162965439601625	0.0048939514590166	16.5	140	standard ATAC-Seq in frozen liver
peak_24051	chr12	117089218	117089481	10.0178050327458	3.35538190716887	0.889919836424547	3.77043163870789	0.000162965439601625	0.0048939514590166	9	61.5	standard ATAC-Seq in frozen liver
peak_44425	chr17	50892901	50893441	9.98662360541423	3.35230679331505	0.889620365346824	3.76824421280883	0.000164399826951623	0.00493148754400551	17	125.5	standard ATAC-Seq in frozen liver
peak_89023	chr7	71622792	71623012	9.98662360541423	3.35230679331505	0.889620365346824	3.76824421280883	0.000164399826951623	0.00493148754400551	6.5	50	standard ATAC-Seq in frozen liver
peak_30825	chr14	43569218	43569434	9.51341465891041	3.72682333743326	0.989262799222772	3.76727330731662	0.0001650402894319	0.00494931113616321	6	48.5	standard ATAC-Seq in frozen liver
peak_34603	chr15	38314065	38314890	10.4978747579453	3.07575638178273	0.816466875195773	3.76715391061667	0.000165119211927955	0.00495028971246527	38.5	202.5	standard ATAC-Seq in frozen liver
peak_24582	chr13	13952801	13953401	10.504377448106	3.07419875779643	0.81623798189191	3.76630201730007	0.000165683353848283	0.00496024976964767	19.5	144	standard ATAC-Seq in frozen liver
peak_64290	chr3	98221289	98221625	10.5023292475641	3.07617476741456	0.816905003465911	3.7656456434508	0.000166119254884417	0.00496677764121274	14	81	standard ATAC-Seq in frozen liver
peak_77642	chr5	110610782	110611168	10.5023292475641	3.07617476741456	0.816905003465911	3.7656456434508	0.000166119254884417	0.00496677764121274	17	93	standard ATAC-Seq in frozen liver
peak_61404	chr3	21968263	21968780	9.48668772119767	3.72408248658387	0.989023227899429	3.76541458434034	0.000166272958934922	0.00496677764121274	11	117	standard ATAC-Seq in frozen liver
peak_2626	chr1	85243844	85244321	9.58106749121599	4.35638603300346	1.15697030010772	3.76533955331252	0.000166322899491337	0.00496688202979729	5	113	standard ATAC-Seq in frozen liver
peak_1854	chr1	64087239	64087951	10.4934202683266	3.07534232620762	0.816829964243426	3.76497246774744	0.0001665674346451	0.00497140800823678	32	173	standard ATAC-Seq in frozen liver
peak_67404	chr4	25399284	25399633	10.4934202683266	3.07534232620762	0.816829964243426	3.76497246774744	0.0001665674346451	0.00497140800823678	15.5	83	standard ATAC-Seq in frozen liver
peak_37653	chr15	101151129	101151514	10.5088319377247	3.07461228810272	0.816675730130466	3.76478959110434	0.000166689384655012	0.00497365962768481	12	91.5	standard ATAC-Seq in frozen liver
peak_98910	chr9	20565212	20565689	10.5132864273435	3.07502471143046	0.817921083948224	3.75956161514614	0.000170211354573529	0.00505484798661277	17.5	114.5	standard ATAC-Seq in frozen liver
peak_74094	chr5	15019445	15019927	9.5178691485292	3.72731883079694	0.992177834518509	3.75670439423368	0.000172165662235056	0.00509864961333555	12.5	109	standard ATAC-Seq in frozen liver
peak_57450	chr2	114637871	114638358	9.52437183868981	3.7253590179825	0.991737741002292	3.75639532908921	0.000172378319678667	0.00510212154113394	9	109	standard ATAC-Seq in frozen liver
peak_69638	chr4	86528400	86528683	9.98216911579543	3.35184620817567	0.89293819210076	3.75372700801383	0.000174224603893764	0.0051453755635999	8	65	standard ATAC-Seq in frozen liver
peak_12616	chr10	121050579	121051012	10.5112382268017	3.07703783118904	0.820194104483119	3.75159710898943	0.000175711669384551	0.00517832067660764	16.5	107	standard ATAC-Seq in frozen liver
peak_102484	chr9	95086344	95086626	10.5112382268017	3.07703783118904	0.820194104483119	3.75159710898943	0.000175711669384551	0.00517832067660764	11.5	68.5	standard ATAC-Seq in frozen liver
peak_86774	chr6	149116254	149117435	11.354224071897	-3.21430143530181	0.85680308818643	-3.75150542711678	0.00017577594755969	0.00517832067660764	423.5	29.5	FFPE-ATAC in frozen liver
peak_94360	chr8	42131106	42131545	11.354224071897	-3.21430143530181	0.85680308818643	-3.75150542711678	0.00017577594755969	0.00517832067660764	156.5	14.5	FFPE-ATAC in frozen liver
peak_93552	chr8	22150022	22150293	10.5177409169623	3.07543932582404	0.819963918512422	3.7507008008395	0.000176341020550952	0.00519067778604411	10.5	66.5	standard ATAC-Seq in frozen liver
peak_5327	chr1	158921069	158921613	10.484511289089	3.07451380846853	0.819967201976809	3.74955705674126	0.000177147189716799	0.00520316164893098	23	128.5	standard ATAC-Seq in frozen liver
peak_66793	chr4	3103005	3103273	11.5479313163145	5.666718416468	1.5114606056887	3.7491671269103	0.000177422823403916	0.00520818537249284	1.5	78.5	standard ATAC-Seq in frozen liver
peak_2871	chr1	89975164	89975690	10.8563363882223	-3.59839324397087	0.960026599234008	-3.7482224417969	0.000178092275611405	0.00522024055888047	184.5	13.5	FFPE-ATAC in frozen liver
peak_46393	chr18	10839336	10840237	9.28047927475066	4.30946819559115	1.1500977922045	3.7470450119992	0.000178929987814718	0.00522803113850223	14	203.5	standard ATAC-Seq in frozen liver
peak_52281	chr19	47961156	47961615	9.28047927475066	4.30946819559115	1.1500977922045	3.7470450119992	0.000178929987814718	0.00522803113850223	7	103.5	standard ATAC-Seq in frozen liver
peak_105106	chrX	47936918	47937484	9.28047927475066	4.30946819559115	1.1500977922045	3.7470450119992	0.000178929987814718	0.00522803113850223	7.5	128	standard ATAC-Seq in frozen liver
peak_68836	chr4	60962310	60962679	11.3412186915758	-3.2131072360384	0.857634786654084	-3.74647494019428	0.000179336909712659	0.0052285916564188	134.5	10.5	FFPE-ATAC in frozen liver
peak_1374	chr1	54074491	54075094	9.28493376436946	4.30992364831922	1.15047588014079	3.74620947967356	0.00017952669438375	0.0052285916564188	13	137	standard ATAC-Seq in frozen liver
peak_27153	chr13	65761570	65761844	9.28493376436946	4.30992364831922	1.15047588014079	3.74620947967356	0.00017952669438375	0.0052285916564188	3.5	62.5	standard ATAC-Seq in frozen liver
peak_28976	chr13	113541850	113542467	9.28493376436946	4.30992364831922	1.15047588014079	3.74620947967356	0.00017952669438375	0.0052285916564188	7.5	141.5	standard ATAC-Seq in frozen liver
peak_28981	chr13	113554761	113555070	9.28493376436946	4.30992364831922	1.15047588014079	3.74620947967356	0.00017952669438375	0.0052285916564188	5	69.5	standard ATAC-Seq in frozen liver
peak_39863	chr16	37847256	37847544	9.28493376436946	4.30992364831922	1.15047588014079	3.74620947967356	0.00017952669438375	0.0052285916564188	3.5	64.5	standard ATAC-Seq in frozen liver
peak_71574	chr4	126940632	126941408	9.28493376436946	4.30992364831922	1.15047588014079	3.74620947967356	0.00017952669438375	0.0052285916564188	14	178.5	standard ATAC-Seq in frozen liver
peak_94632	chr8	48448573	48449059	9.28493376436946	4.30992364831922	1.15047588014079	3.74620947967356	0.00017952669438375	0.0052285916564188	7.5	112.5	standard ATAC-Seq in frozen liver
peak_106462	chrX	145316759	145317215	9.28493376436946	4.30992364831922	1.15047588014079	3.74620947967356	0.00017952669438375	0.0052285916564188	8	103	standard ATAC-Seq in frozen liver
peak_1687	chr1	59959449	59960122	9.27602478513187	4.309012822749	1.15040784514691	3.74563928864614	0.000179934977480123	0.0052285916564188	10.5	154	standard ATAC-Seq in frozen liver
peak_5590	chr1	164880187	164880637	9.27602478513187	4.309012822749	1.15040784514691	3.74563928864614	0.000179934977480123	0.0052285916564188	6	99.5	standard ATAC-Seq in frozen liver
peak_18720	chr11	109448287	109448733	9.27602478513187	4.309012822749	1.15040784514691	3.74563928864614	0.000179934977480123	0.0052285916564188	9	101	standard ATAC-Seq in frozen liver
peak_46657	chr18	16688986	16689485	9.27602478513187	4.309012822749	1.15040784514691	3.74563928864614	0.000179934977480123	0.0052285916564188	10.5	113.5	standard ATAC-Seq in frozen liver
peak_48633	chr18	65854991	65855369	9.27602478513187	4.309012822749	1.15040784514691	3.74563928864614	0.000179934977480123	0.0052285916564188	7	86	standard ATAC-Seq in frozen liver
peak_39500	chr16	32664369	32664591	10.8477854975198	-3.59625450880627	0.960132324149333	-3.74558216440896	0.000179975929149119	0.0052285916564188	78	6	FFPE-ATAC in frozen liver
peak_3624	chr1	121318336	121319135	9.28938825398825	4.31038288733225	1.15154902094113	3.74311714824741	0.000181751440403745	0.0052530587257665	11	181	standard ATAC-Seq in frozen liver
peak_27226	chr13	66776488	66776780	9.28938825398825	4.31038288733225	1.15154902094113	3.74311714824741	0.000181751440403745	0.0052530587257665	5	65.5	standard ATAC-Seq in frozen liver
peak_32569	chr14	77093655	77094104	9.28938825398825	4.31038288733225	1.15154902094113	3.74311714824741	0.000181751440403745	0.0052530587257665	9	100.5	standard ATAC-Seq in frozen liver
peak_42070	chr17	10286583	10287534	9.28938825398825	4.31038288733225	1.15154902094113	3.74311714824741	0.000181751440403745	0.0052530587257665	21	212.5	standard ATAC-Seq in frozen liver
peak_94067	chr8	35565790	35566281	9.28938825398825	4.31038288733225	1.15154902094113	3.74311714824741	0.000181751440403745	0.0052530587257665	9	109.5	standard ATAC-Seq in frozen liver
peak_50829	chr19	29115382	29115639	11.3627749625994	-3.21633460018672	0.859607955903777	-3.74162963255165	0.000182830827351445	0.00527712438492204	92.5	6.5	FFPE-ATAC in frozen liver
peak_37622	chr15	100978405	100978633	10.5221954065811	3.07585911304661	0.822907238242871	3.73779567137408	0.000185640716513957	0.00533544206132495	7.5	55	standard ATAC-Seq in frozen liver
peak_62174	chr3	51516423	51516640	9.29384274360704	4.31084956647383	1.15333788340173	3.73771609214736	0.000185699467474462	0.00533544206132495	3	49	standard ATAC-Seq in frozen liver
peak_53283	chr2	11161184	11161436	5.24790919248699	6.0003456177467	1.60754954831652	3.7326038404418	0.000189510529880642	0.00539552821557465	0	34.5	standard ATAC-Seq in frozen liver
peak_93407	chr8	15142111	15142553	5.24790919248699	6.0003456177467	1.60754954831652	3.7326038404418	0.000189510529880642	0.00539552821557465	1	58	standard ATAC-Seq in frozen liver
peak_104826	chrX	31039824	31040039	5.24790919248699	6.0003456177467	1.60754954831652	3.7326038404418	0.000189510529880642	0.00539552821557465	1	29.5	standard ATAC-Seq in frozen liver
peak_1516	chr1	57882190	57882531	5.2434547028682	5.99955872402475	1.60759065679904	3.73201890583937	0.000189951241205033	0.00539552821557465	2	45	standard ATAC-Seq in frozen liver
peak_4281	chr1	135467988	135468212	5.2434547028682	5.99955872402475	1.60759065679904	3.73201890583937	0.000189951241205033	0.00539552821557465	0.5	30	standard ATAC-Seq in frozen liver
peak_40594	chr16	59245376	59245579	5.2434547028682	5.99955872402475	1.60759065679904	3.73201890583937	0.000189951241205033	0.00539552821557465	1	26.5	standard ATAC-Seq in frozen liver
peak_47827	chr18	48196783	48197062	5.2434547028682	5.99955872402475	1.60759065679904	3.73201890583937	0.000189951241205033	0.00539552821557465	0.5	37.5	standard ATAC-Seq in frozen liver
peak_47861	chr18	50662935	50664098	5.2434547028682	5.99955872402475	1.60759065679904	3.73201890583937	0.000189951241205033	0.00539552821557465	5	153.5	standard ATAC-Seq in frozen liver
peak_51573	chr19	40009946	40010208	5.2434547028682	5.99955872402475	1.60759065679904	3.73201890583937	0.000189951241205033	0.00539552821557465	1	35	standard ATAC-Seq in frozen liver
peak_62267	chr3	52548244	52548538	5.2434547028682	5.99955872402475	1.60759065679904	3.73201890583937	0.000189951241205033	0.00539552821557465	1.5	38.5	standard ATAC-Seq in frozen liver
peak_71907	chr4	132002019	132002354	5.2434547028682	5.99955872402475	1.60759065679904	3.73201890583937	0.000189951241205033	0.00539552821557465	1	44.5	standard ATAC-Seq in frozen liver
peak_77396	chr5	105974741	105975115	5.2434547028682	5.99955872402475	1.60759065679904	3.73201890583937	0.000189951241205033	0.00539552821557465	2	49.5	standard ATAC-Seq in frozen liver
peak_38747	chr16	21792852	21793057	10.8388765182823	-3.59808902508611	0.964178420264389	-3.73176680732957	0.000190141478409315	0.00539780715678622	71.5	4.5	FFPE-ATAC in frozen liver
peak_36176	chr15	78616408	78616760	9.29829723322583	4.31132724807826	1.15587767483664	3.72991653177106	0.000191543213144497	0.0054195499177561	5.5	80	standard ATAC-Seq in frozen liver
peak_47903	chr18	52909393	52909987	9.29829723322583	4.31132724807826	1.15587767483664	3.72991653177106	0.000191543213144497	0.0054195499177561	12	135	standard ATAC-Seq in frozen liver
peak_13561	chr11	9089526	9089887	5.25236368210578	6.00113787961978	1.60907689260812	3.72955320357169	0.000191819602191033	0.0054195499177561	2.5	50	standard ATAC-Seq in frozen liver
peak_18831	chr11	110818111	110818548	5.25236368210578	6.00113787961978	1.60907689260812	3.72955320357169	0.000191819602191033	0.0054195499177561	2	58	standard ATAC-Seq in frozen liver
peak_18981	chr11	114933088	114933579	5.25236368210578	6.00113787961978	1.60907689260812	3.72955320357169	0.000191819602191033	0.0054195499177561	3	67	standard ATAC-Seq in frozen liver
peak_23952	chr12	116106868	116107119	5.25236368210578	6.00113787961978	1.60907689260812	3.72955320357169	0.000191819602191033	0.0054195499177561	1	33.5	standard ATAC-Seq in frozen liver
peak_24722	chr13	19025427	19025679	5.25236368210578	6.00113787961978	1.60907689260812	3.72955320357169	0.000191819602191033	0.0054195499177561	1.5	33	standard ATAC-Seq in frozen liver
peak_43263	chr17	31019250	31019487	5.25236368210578	6.00113787961978	1.60907689260812	3.72955320357169	0.000191819602191033	0.0054195499177561	0.5	31.5	standard ATAC-Seq in frozen liver
peak_80507	chr6	6647565	6647876	5.25236368210578	6.00113787961978	1.60907689260812	3.72955320357169	0.000191819602191033	0.0054195499177561	1.5	41.5	standard ATAC-Seq in frozen liver
peak_87452	chr7	25240776	25241079	5.25236368210578	6.00113787961978	1.60907689260812	3.72955320357169	0.000191819602191033	0.0054195499177561	1	42.5	standard ATAC-Seq in frozen liver
peak_104824	chrX	30923098	30923453	5.25236368210578	6.00113787961978	1.60907689260812	3.72955320357169	0.000191819602191033	0.0054195499177561	2.5	46	standard ATAC-Seq in frozen liver
peak_105141	chrX	48641702	48642162	5.25236368210578	6.00113787961978	1.60907689260812	3.72955320357169	0.000191819602191033	0.0054195499177561	1.5	60.5	standard ATAC-Seq in frozen liver
peak_1068	chr1	41422192	41422431	5.2390002132494	5.99876647422813	1.60920220267711	3.72778912696517	0.00019316689688894	0.00543750323411593	1	31.5	standard ATAC-Seq in frozen liver
peak_11062	chr10	85712963	85713269	5.2390002132494	5.99876647422813	1.60920220267711	3.72778912696517	0.00019316689688894	0.00543750323411593	0.5	40	standard ATAC-Seq in frozen liver
peak_11110	chr10	86349331	86349628	5.2390002132494	5.99876647422813	1.60920220267711	3.72778912696517	0.00019316689688894	0.00543750323411593	0	40.5	standard ATAC-Seq in frozen liver
peak_39761	chr16	35643757	35644227	5.2390002132494	5.99876647422813	1.60920220267711	3.72778912696517	0.00019316689688894	0.00543750323411593	1	62.5	standard ATAC-Seq in frozen liver
peak_73142	chr4	146867620	146867977	5.2390002132494	5.99876647422813	1.60920220267711	3.72778912696517	0.00019316689688894	0.00543750323411593	1.5	47	standard ATAC-Seq in frozen liver
peak_77329	chr5	104501391	104501707	5.2390002132494	5.99876647422813	1.60920220267711	3.72778912696517	0.00019316689688894	0.00543750323411593	1.5	43	standard ATAC-Seq in frozen liver
peak_90781	chr7	110979272	110979474	5.2390002132494	5.99876647422813	1.60920220267711	3.72778912696517	0.00019316689688894	0.00543750323411593	0	27.5	standard ATAC-Seq in frozen liver
peak_91475	chr7	126073414	126073790	5.2390002132494	5.99876647422813	1.60920220267711	3.72778912696517	0.00019316689688894	0.00543750323411593	1.5	49	standard ATAC-Seq in frozen liver
peak_95500	chr8	75166839	75167097	5.2390002132494	5.99876647422813	1.60920220267711	3.72778912696517	0.00019316689688894	0.00543750323411593	1	34.5	standard ATAC-Seq in frozen liver
peak_104842	chrX	31680237	31680446	5.2390002132494	5.99876647422813	1.60920220267711	3.72778912696517	0.00019316689688894	0.00543750323411593	0.5	28.5	standard ATAC-Seq in frozen liver
peak_5929	chr1	171383815	171384078	5.25681817172457	6.00194631926372	1.61225884354283	3.72269399749412	0.00019710835441277	0.00551060520939173	1	35	standard ATAC-Seq in frozen liver
peak_9322	chr10	53598948	53599236	5.25681817172457	6.00194631926372	1.61225884354283	3.72269399749412	0.00019710835441277	0.00551060520939173	1	38	standard ATAC-Seq in frozen liver
peak_27392	chr13	70615369	70615621	5.25681817172457	6.00194631926372	1.61225884354283	3.72269399749412	0.00019710835441277	0.00551060520939173	0.5	33.5	standard ATAC-Seq in frozen liver
peak_30790	chr14	42260666	42261097	5.25681817172457	6.00194631926372	1.61225884354283	3.72269399749412	0.00019710835441277	0.00551060520939173	1.5	57.5	standard ATAC-Seq in frozen liver
peak_58973	chr2	148116821	148117142	5.25681817172457	6.00194631926372	1.61225884354283	3.72269399749412	0.00019710835441277	0.00551060520939173	1	43	standard ATAC-Seq in frozen liver
peak_27961	chr13	94913180	94913642	9.72612579551802	3.30944914471709	0.889234806451847	3.72168196825559	0.000197900175547441	0.00552276797308657	13.5	106.5	standard ATAC-Seq in frozen liver
peak_53753	chr2	24961642	24961978	9.72612579551802	3.30944914471709	0.889234806451847	3.72168196825559	0.000197900175547441	0.00552276797308657	11	74.5	standard ATAC-Seq in frozen liver
peak_64039	chr3	95799747	95800119	9.72612579551802	3.30944914471709	0.889234806451847	3.72168196825559	0.000197900175547441	0.00552276797308657	11.5	86	standard ATAC-Seq in frozen liver
peak_104464	chrX	9324541	9325007	9.72612579551802	3.30944914471709	0.889234806451847	3.72168196825559	0.000197900175547441	0.00552276797308657	16	105	standard ATAC-Seq in frozen liver
peak_12276	chr10	115738193	115738724	9.73058028513681	3.30989508196467	0.889700871533718	3.72023360644672	0.000199038588052214	0.00554585397803954	17	122.5	standard ATAC-Seq in frozen liver
peak_35684	chr15	73277176	73277766	9.73058028513681	3.30989508196467	0.889700871533718	3.72023360644672	0.000199038588052214	0.00554585397803954	18	130	standard ATAC-Seq in frozen liver
peak_40964	chr16	84805098	84805473	9.73058028513681	3.30989508196467	0.889700871533718	3.72023360644672	0.000199038588052214	0.00554585397803954	13	84.5	standard ATAC-Seq in frozen liver
peak_9688	chr10	61383772	61384074	5.23454572363061	5.99795807675879	1.61246054503313	3.71975493926616	0.000199416171232064	0.00554933909004149	0	40	standard ATAC-Seq in frozen liver
peak_11233	chr10	88175248	88175448	5.23454572363061	5.99795807675879	1.61246054503313	3.71975493926616	0.000199416171232064	0.00554933909004149	1	26	standard ATAC-Seq in frozen liver
peak_2649	chr1	87505557	87505769	9.30275172284462	4.31181935108312	1.15921814743355	3.7195926932556	0.00019954430708572	0.00554933909004149	3.5	47.5	standard ATAC-Seq in frozen liver
peak_6826	chr1	187103072	187103483	9.72167130589922	3.30900318681323	0.889614979355636	3.71959023128185	0.000199546252056535	0.00554933909004149	13.5	93	standard ATAC-Seq in frozen liver
peak_35819	chr15	75429533	75429857	9.72167130589922	3.30900318681323	0.889614979355636	3.71959023128185	0.000199546252056535	0.00554933909004149	9	72.5	standard ATAC-Seq in frozen liver
peak_57202	chr2	105237072	105237304	9.72167130589922	3.30900318681323	0.889614979355636	3.71959023128185	0.000199546252056535	0.00554933909004149	6.5	53	standard ATAC-Seq in frozen liver
peak_103788	chr9	120687481	120687853	9.72167130589922	3.30900318681323	0.889614979355636	3.71959023128185	0.000199546252056535	0.00554933909004149	12	84	standard ATAC-Seq in frozen liver
peak_66863	chr4	5983447	5984121	11.2631128577825	5.6317461267817	1.51419271296223	3.71930605567654	0.000199770871834965	0.00555323557659457	7.5	192.5	standard ATAC-Seq in frozen liver
peak_105108	chrX	47950327	47950729	11.2740700375619	5.63126585240012	1.51413765517245	3.71912410550199	0.000199914814695585	0.00555434927740483	3.5	112	standard ATAC-Seq in frozen liver
peak_7833	chr10	13774901	13775427	9.22618991130146	3.67987893788651	0.989949069488742	3.71724066550917	0.000201410561451226	0.00557692854390835	14.5	115.5	standard ATAC-Seq in frozen liver
peak_52160	chr19	46809648	46810107	9.22618991130146	3.67987893788651	0.989949069488742	3.71724066550917	0.000201410561451226	0.00557692854390835	9	100.5	standard ATAC-Seq in frozen liver
peak_6627	chr1	183673078	183673952	9.23269260146206	3.67796801982904	0.989516387207706	3.71693492637127	0.000201654355884283	0.00557692854390835	22	193	standard ATAC-Seq in frozen liver
peak_46614	chr18	14130966	14131580	9.23269260146206	3.67796801982904	0.989516387207706	3.71693492637127	0.000201654355884283	0.00557692854390835	13.5	130.5	standard ATAC-Seq in frozen liver
peak_66498	chr3	148989692	148990136	9.23269260146206	3.67796801982904	0.989516387207706	3.71693492637127	0.000201654355884283	0.00557692854390835	9.5	97.5	standard ATAC-Seq in frozen liver
peak_79516	chr5	140178189	140178707	9.23269260146206	3.67796801982904	0.989516387207706	3.71693492637127	0.000201654355884283	0.00557692854390835	15	113	standard ATAC-Seq in frozen liver
peak_20410	chr12	25804156	25804591	9.22173542168266	3.6794134309668	0.989909215359767	3.71692007092749	0.000201666208579598	0.00557692854390835	10.5	94	standard ATAC-Seq in frozen liver
peak_27959	chr13	94900331	94900771	9.22173542168266	3.6794134309668	0.989909215359767	3.71692007092749	0.000201666208579598	0.00557692854390835	10	94	standard ATAC-Seq in frozen liver
peak_57474	chr2	115602528	115603208	9.22173542168266	3.6794134309668	0.989909215359767	3.71692007092749	0.000201666208579598	0.00557692854390835	17	150.5	standard ATAC-Seq in frozen liver
peak_99245	chr9	26917002	26917548	9.22173542168266	3.6794134309668	0.989909215359767	3.71692007092749	0.000201666208579598	0.00557692854390835	12	117.5	standard ATAC-Seq in frozen liver
peak_2531	chr1	82970919	82971408	9.7350347747556	3.31034477241049	0.891021153543402	3.71522579373784	0.000203022321759851	0.00559914395704925	15.5	111.5	standard ATAC-Seq in frozen liver
peak_28655	chr13	108397315	108397897	9.7350347747556	3.31034477241049	0.891021153543402	3.71522579373784	0.000203022321759851	0.00559914395704925	15.5	134	standard ATAC-Seq in frozen liver
peak_85969	chr6	136397697	136398317	9.7350347747556	3.31034477241049	0.891021153543402	3.71522579373784	0.000203022321759851	0.00559914395704925	16.5	139	standard ATAC-Seq in frozen liver
peak_95079	chr8	70735879	70736275	9.7350347747556	3.31034477241049	0.891021153543402	3.71522579373784	0.000203022321759851	0.00559914395704925	12.5	88	standard ATAC-Seq in frozen liver
peak_104267	chrUn_random	5327639	5327942	9.7350347747556	3.31034477241049	0.891021153543402	3.71522579373784	0.000203022321759851	0.00559914395704925	8.5	69	standard ATAC-Seq in frozen liver
peak_8649	chr10	33601455	33601890	11.2497493889261	5.63065304324983	1.51568048802354	3.71493404298703	0.000203256704264599	0.0056025931939211	3.5	121.5	standard ATAC-Seq in frozen liver
peak_97366	chr8	117846305	117846912	9.23064440092025	3.68035271822073	0.990828643323918	3.71441897952637	0.000203671109114297	0.00560902596047867	15.5	133	standard ATAC-Seq in frozen liver
peak_98860	chr9	15541955	15542482	9.23064440092025	3.68035271822073	0.990828643323918	3.71441897952637	0.000203671109114297	0.00560902596047867	12	115.5	standard ATAC-Seq in frozen liver
peak_24122	chr12	118896166	118896637	9.23714709108085	3.67842856646083	0.990393937949176	3.71410650400163	0.000203922904366559	0.00560902596047867	9.5	102.5	standard ATAC-Seq in frozen liver
peak_83215	chr6	84538858	84539189	9.23714709108085	3.67842856646083	0.990393937949176	3.71410650400163	0.000203922904366559	0.00560902596047867	8	72.5	standard ATAC-Seq in frozen liver
peak_89381	chr7	78455836	78456796	9.23714709108085	3.67842856646083	0.990393937949176	3.71410650400163	0.000203922904366559	0.00560902596047867	21	205.5	standard ATAC-Seq in frozen liver
peak_75357	chr5	46826879	46827212	9.71721681628043	3.30855341851411	0.890849093749145	3.71393251868287	0.000204063229820802	0.00560902596047867	10.5	74.5	standard ATAC-Seq in frozen liver
peak_11120	chr10	86474824	86475223	9.21728093206387	3.67895219037187	0.990708895760038	3.71345428118873	0.000204449413138341	0.00561613557451864	10.5	84.5	standard ATAC-Seq in frozen liver
peak_3606	chr1	121135013	121135399	9.22378362222448	3.67703016064095	0.990274518485443	3.71314225702254	0.000204701746884576	0.00561873719458155	9	82.5	standard ATAC-Seq in frozen liver
peak_53421	chr2	14154407	14154920	9.22378362222448	3.67703016064095	0.990274518485443	3.71314225702254	0.000204701746884576	0.00561873719458155	11.5	114.5	standard ATAC-Seq in frozen liver
peak_74770	chr5	32630427	32630920	9.22378362222448	3.67703016064095	0.990274518485443	3.71314225702254	0.000204701746884576	0.00561873719458155	11	106.5	standard ATAC-Seq in frozen liver
peak_36973	chr15	89327952	89328566	9.7240775949762	3.31166325325291	0.892093332154225	3.71223854487951	0.000205434229962302	0.00563305926100989	17	136.5	standard ATAC-Seq in frozen liver
peak_24048	chr12	117076625	117076862	5.26127266134336	6.00278164472409	1.61724249326493	3.71173875885831	0.00020584037658447	0.00563408344805904	1	32	standard ATAC-Seq in frozen liver
peak_29261	chr14	6277743	6277956	5.26127266134336	6.00278164472409	1.61724249326493	3.71173875885831	0.00020584037658447	0.00563408344805904	0.5	29	standard ATAC-Seq in frozen liver
peak_95418	chr8	74381895	74382095	5.26127266134336	6.00278164472409	1.61724249326493	3.71173875885831	0.00020584037658447	0.00563408344805904	0.5	27.5	standard ATAC-Seq in frozen liver
peak_102291	chr9	88253725	88254010	5.26127266134336	6.00278164472409	1.61724249326493	3.71173875885831	0.00020584037658447	0.00563408344805904	1	37.5	standard ATAC-Seq in frozen liver
peak_104850	chrX	31954388	31954589	5.26127266134336	6.00278164472409	1.61724249326493	3.71173875885831	0.00020584037658447	0.00563408344805904	1	28	standard ATAC-Seq in frozen liver
peak_5508	chr1	163124889	163125322	9.71516861573862	3.31076397289032	0.892005021621329	3.71159790880168	0.000205954973274734	0.00563577760671104	16	98	standard ATAC-Seq in frozen liver
peak_94369	chr8	42160216	42160483	11.3436249806528	-3.21072070113528	0.865204879701986	-3.71093688496208	0.000206493588376271	0.00564329615317404	96.5	7.5	FFPE-ATAC in frozen liver
peak_43278	chr17	31216190	31216815	9.73708297529741	3.30812957988154	0.891481611489415	3.71082200378153	0.00020658733064454	0.00564441557276352	18	141	standard ATAC-Seq in frozen liver
peak_84072	chr6	97409251	97409451	9.72817399605983	3.30723276999237	0.891393577167913	3.7101824095479	0.000207109966414268	0.00565018692408119	7	45.5	standard ATAC-Seq in frozen liver
peak_73130	chr4	146787740	146787940	11.2853853058765	5.63364860659357	1.51861401457028	3.7097304203318	0.000207480051912775	0.00565436016093277	1	56	standard ATAC-Seq in frozen liver
peak_45122	chr17	73416729	73417140	9.23509889053904	3.6808388754124	0.992565248291618	3.70840998286791	0.000208564777528911	0.00567668840523394	10	89	standard ATAC-Seq in frozen liver
peak_50580	chr19	21993524	21993971	9.23509889053904	3.6808388754124	0.992565248291618	3.70840998286791	0.000208564777528911	0.00567668840523394	9.5	100	standard ATAC-Seq in frozen liver
peak_56206	chr2	75798464	75798933	9.24160158069964	3.67888875609314	0.992126593374235	3.70808400930086	0.000208833379973751	0.00568255288066488	12	101.5	standard ATAC-Seq in frozen liver
peak_13712	chr11	16897480	16897838	5.23009123401182	5.99712260239338	1.61754154076449	3.70755399552768	0.000209270805380132	0.00569300703549885	2	45.5	standard ATAC-Seq in frozen liver
peak_89397	chr7	78849840	78850788	9.73948926437439	3.31080179841125	0.893185759530241	3.70673374836665	0.000209949459872736	0.00570711369835551	29.5	218	standard ATAC-Seq in frozen liver
peak_15158	chr11	55231380	55231826	9.21932913260569	3.67654470813388	0.991926988474727	3.70646705942264	0.000210170557346616	0.00571022084148621	11	95	standard ATAC-Seq in frozen liver
peak_87135	chr7	16829478	16829689	9.7415374649162	3.30856536179424	0.892834779541725	3.70568602120592	0.000210819332801418	0.00572348530856837	7	47.5	standard ATAC-Seq in frozen liver
peak_34835	chr15	46455171	46455800	10.6412189625377	-3.56538832703858	0.96321600070802	-3.70154599219471	0.000214289802834246	0.00579839652818436	214.5	13	FFPE-ATAC in frozen liver
peak_70284	chr4	103059868	103060623	10.6412189625377	-3.56538832703858	0.96321600070802	-3.70154599219471	0.000214289802834246	0.00579839652818436	258	17	FFPE-ATAC in frozen liver
peak_73050	chr4	145184824	145185036	9.23955338015783	3.68134133507455	0.995193896275481	3.69911968798442	0.000216348564511356	0.00583655376899089	4.5	47.5	standard ATAC-Seq in frozen liver
peak_52903	chr1_random	1132605	1132881	9.24605607031843	3.67935249488128	0.994749434637895	3.69877314503891	0.0002166441235016	0.00584175941388302	6.5	61	standard ATAC-Seq in frozen liver
peak_77117	chr5	100842653	100843031	11.1216467762724	-3.18167592138181	0.860795421200915	-3.69620451389366	0.000218846701995055	0.00589205625998217	134	12	FFPE-ATAC in frozen liver
peak_12531	chr10	120188914	120189539	9.00661799599808	4.26389834833234	1.15396817471504	3.69498781834713	0.000219897329711845	0.00590202826203141	11.5	136	standard ATAC-Seq in frozen liver
peak_16763	chr11	80634813	80635470	9.00661799599808	4.26389834833234	1.15396817471504	3.69498781834713	0.000219897329711845	0.00590202826203141	13	142	standard ATAC-Seq in frozen liver
peak_37292	chr15	97402020	97402742	9.00661799599808	4.26389834833234	1.15396817471504	3.69498781834713	0.000219897329711845	0.00590202826203141	10.5	154.5	standard ATAC-Seq in frozen liver
peak_60763	chr2	179317651	179318038	9.00661799599808	4.26389834833234	1.15396817471504	3.69498781834713	0.000219897329711845	0.00590202826203141	3.5	84.5	standard ATAC-Seq in frozen liver
peak_73561	chr4	151276678	151277182	9.00661799599808	4.26389834833234	1.15396817471504	3.69498781834713	0.000219897329711845	0.00590202826203141	9.5	112	standard ATAC-Seq in frozen liver
peak_92189	chr7	139627098	139627719	9.00661799599808	4.26389834833234	1.15396817471504	3.69498781834713	0.000219897329711845	0.00590202826203141	8	135	standard ATAC-Seq in frozen liver
peak_98821	chr9	15038371	15039207	9.00661799599808	4.26389834833234	1.15396817471504	3.69498781834713	0.000219897329711845	0.00590202826203141	9.5	185	standard ATAC-Seq in frozen liver
peak_100608	chr9	57165325	57165958	9.00661799599808	4.26389834833234	1.15396817471504	3.69498781834713	0.000219897329711845	0.00590202826203141	9	137	standard ATAC-Seq in frozen liver
peak_3835	chr1	129153529	129153963	9.00216350637929	4.26342905809519	1.15393421496858	3.69468987295022	0.000220155329087081	0.00590202826203141	5	96	standard ATAC-Seq in frozen liver
peak_43939	chr17	43557284	43557806	9.00216350637929	4.26342905809519	1.15393421496858	3.69468987295022	0.000220155329087081	0.00590202826203141	7.5	112.5	standard ATAC-Seq in frozen liver
peak_48257	chr18	60828628	60829191	9.00216350637929	4.26342905809519	1.15393421496858	3.69468987295022	0.000220155329087081	0.00590202826203141	9.5	124	standard ATAC-Seq in frozen liver
peak_58974	chr2	148163931	148164556	9.00216350637929	4.26342905809519	1.15393421496858	3.69468987295022	0.000220155329087081	0.00590202826203141	6.5	137.5	standard ATAC-Seq in frozen liver
peak_70204	chr4	101718037	101718736	9.00216350637929	4.26342905809519	1.15393421496858	3.69468987295022	0.000220155329087081	0.00590202826203141	7	152.5	standard ATAC-Seq in frozen liver
peak_73090	chr4	146140955	146141719	9.00216350637929	4.26342905809519	1.15393421496858	3.69468987295022	0.000220155329087081	0.00590202826203141	12	167	standard ATAC-Seq in frozen liver
peak_76975	chr5	97451239	97451693	9.00216350637929	4.26342905809519	1.15393421496858	3.69468987295022	0.000220155329087081	0.00590202826203141	8.5	96	standard ATAC-Seq in frozen liver
peak_24559	chr13	13531684	13531891	9.74394375399318	3.31127006868079	0.896310179727272	3.69433500095731	0.000220462993635337	0.00590731447666482	6	47.5	standard ATAC-Seq in frozen liver
peak_46918	chr18	26166407	26166640	9.74394375399318	3.31127006868079	0.896310179727272	3.69433500095731	0.000220462993635337	0.00590731447666482	7	54.5	standard ATAC-Seq in frozen liver
peak_9987	chr10	68331536	68332016	9.01107248561687	4.26436969545047	1.1547345298089	3.6929437765719	0.000221673045462498	0.00591749720636897	8	103	standard ATAC-Seq in frozen liver
peak_58559	chr2	135551115	135551567	9.01107248561687	4.26436969545047	1.1547345298089	3.6929437765719	0.000221673045462498	0.00591749720636897	8.5	100	standard ATAC-Seq in frozen liver
peak_70403	chr4	104930324	104930743	9.01107248561687	4.26436969545047	1.1547345298089	3.6929437765719	0.000221673045462498	0.00591749720636897	8.5	94	standard ATAC-Seq in frozen liver
peak_78681	chr5	124716722	124717199	9.01107248561687	4.26436969545047	1.1547345298089	3.6929437765719	0.000221673045462498	0.00591749720636897	6.5	105	standard ATAC-Seq in frozen liver
peak_94286	chr8	40759425	40759995	9.01107248561687	4.26436969545047	1.1547345298089	3.6929437765719	0.000221673045462498	0.00591749720636897	10.5	126.5	standard ATAC-Seq in frozen liver
peak_8762	chr10	39137429	39137822	10.2240134791928	3.03292122474636	0.821402236405923	3.6923703032719	0.000222173650514827	0.00592051532828436	15	91	standard ATAC-Seq in frozen liver
peak_29753	chr14	21457248	21457525	10.2240134791928	3.03292122474636	0.821402236405923	3.6923703032719	0.000222173650514827	0.00592051532828436	10	66	standard ATAC-Seq in frozen liver
peak_55556	chr2	61500907	61501227	10.2240134791928	3.03292122474636	0.821402236405923	3.6923703032719	0.000222173650514827	0.00592051532828436	13	74.5	standard ATAC-Seq in frozen liver
peak_94834	chr8	60278633	60279548	10.2240134791928	3.03292122474636	0.821402236405923	3.6923703032719	0.000222173650514827	0.00592051532828436	36.5	217.5	standard ATAC-Seq in frozen liver
peak_90333	chr7	105225858	105226361	8.9977090167605	4.26295785531712	1.15463251086608	3.69204730959766	0.000222456070079923	0.00592375981988461	9	110.5	standard ATAC-Seq in frozen liver
peak_78402	chr5	122499883	122500764	10.219558989574	3.03249255105438	0.82135939063099	3.69204100622109	0.000222461584984492	0.00592375981988461	33	208	standard ATAC-Seq in frozen liver
peak_36554	chr15	82464865	82465246	11.1326039560518	-3.18144330950624	0.861778853929607	-3.69171661035687	0.000222745576393375	0.00592542019749531	132.5	11	FFPE-ATAC in frozen liver
peak_7612	chr10	7913260	7913618	10.2305161693534	3.03132195870409	0.821178464203281	3.69142895344329	0.000222997689460402	0.00593065155762396	15	82.5	standard ATAC-Seq in frozen liver
peak_85540	chr6	127215908	127216586	10.2260616797346	3.03089379466584	0.821135782709368	3.69109939974275	0.000223286851635226	0.00593686539707097	23.5	156.5	standard ATAC-Seq in frozen liver
peak_4236	chr1	135125603	135126070	10.2284679688116	3.03335625612407	0.822294042276353	3.68889484803616	0.000225230275457758	0.00597654173764813	19.5	110	standard ATAC-Seq in frozen liver
peak_6527	chr1	182287024	182287373	10.2284679688116	3.03335625612407	0.822294042276353	3.68889484803616	0.000225230275457758	0.00597654173764813	14.5	82.5	standard ATAC-Seq in frozen liver
peak_90494	chr7	106633291	106633524	10.2284679688116	3.03335625612407	0.822294042276353	3.68889484803616	0.000225230275457758	0.00597654173764813	10.5	53.5	standard ATAC-Seq in frozen liver
peak_106861	chrX	166580880	166581085	10.2284679688116	3.03335625612407	0.822294042276353	3.68889484803616	0.000225230275457758	0.00597654173764813	8.5	48.5	standard ATAC-Seq in frozen liver
peak_29976	chr14	25626367	25627231	10.9912997795717	5.59417307215392	1.51657612184753	3.68868597597262	0.00022541522786351	0.00597654173764813	6	235.5	standard ATAC-Seq in frozen liver
peak_45147	chr17	74188789	74189465	9.01552697523566	4.26484703341154	1.15624857852529	3.68852088782764	0.000225561511264813	0.00597654173764813	10.5	149.5	standard ATAC-Seq in frozen liver
peak_61027	chr3	9407102	9407503	9.01552697523566	4.26484703341154	1.15624857852529	3.68852088782764	0.000225561511264813	0.00597654173764813	6.5	88.5	standard ATAC-Seq in frozen liver
peak_78737	chr5	125473134	125473718	9.01552697523566	4.26484703341154	1.15624857852529	3.68852088782764	0.000225561511264813	0.00597654173764813	6.5	129.5	standard ATAC-Seq in frozen liver
peak_96634	chr8	106625334	106625684	10.2151044999552	3.03206664571008	0.822165357417432	3.68790367820209	0.000226109205912811	0.00598277469995147	14	80.5	standard ATAC-Seq in frozen liver
peak_104255	chrUn_random	5188585	5188822	10.9803425997923	5.59467319812235	1.51716227750047	3.68759049779408	0.000226387590647098	0.00598656344119932	1.5	64	standard ATAC-Seq in frozen liver
peak_18823	chr11	110412887	110413365	8.99325452714171	4.26248077348771	1.15607811776355	3.68701795146294	0.000226897356514006	0.00599411472535852	8.5	103.5	standard ATAC-Seq in frozen liver
peak_54567	chr2	33438859	33439071	8.99325452714171	4.26248077348771	1.15607811776355	3.68701795146294	0.000226897356514006	0.00599411472535852	3	46.5	standard ATAC-Seq in frozen liver
peak_28193	chr13	98067573	98067969	10.2216071901158	3.03045915102807	0.821941465156634	3.68695251364471	0.000226955687545701	0.00599417492478383	14	91.5	standard ATAC-Seq in frozen liver
peak_23951	chr12	116076165	116076446	9.25051055993722	3.67982279511967	0.998316577652841	3.68602793692093	0.000227781357663886	0.00599635157139067	7	61	standard ATAC-Seq in frozen liver
peak_73048	chr4	145177998	145178233	9.25051055993722	3.67982279511967	0.998316577652841	3.68602793692093	0.000227781357663886	0.00599635157139067	5.5	52	standard ATAC-Seq in frozen liver
peak_58557	chr2	135537548	135538010	9.01757517577748	4.26227058439148	1.15645439705443	3.68563654152537	0.000228131732187449	0.00599709422526882	7	100	standard ATAC-Seq in frozen liver
peak_5153	chr1	155874452	155874821	9.01998146485445	4.26533422114083	1.15854136471573	3.68164171866873	0.000231736916515615	0.00605556357068848	8	80.5	standard ATAC-Seq in frozen liver
peak_61627	chr3	29438011	29438590	9.01998146485445	4.26533422114083	1.15854136471573	3.68164171866873	0.000231736916515615	0.00605556357068848	8	128	standard ATAC-Seq in frozen liver
peak_104337	chrX	4232662	4232982	9.01998146485445	4.26533422114083	1.15854136471573	3.68164171866873	0.000231736916515615	0.00605556357068848	4.5	71.5	standard ATAC-Seq in frozen liver
peak_19291	chr11	117747325	117747596	10.2329224584303	3.03380126168725	0.824049901241229	3.68157469240343	0.00023179785890619	0.00605556357068848	12	64	standard ATAC-Seq in frozen liver
peak_93184	chr8	11340300	11340658	10.2329224584303	3.03380126168725	0.824049901241229	3.68157469240343	0.00023179785890619	0.00605556357068848	15.5	84	standard ATAC-Seq in frozen liver
peak_64638	chr3	104821005	104821402	10.239425148591	3.03217312719391	0.82382446019681	3.68060584953927	0.000232680442988366	0.00606893021773973	15	91.5	standard ATAC-Seq in frozen liver
peak_27147	chr13	65728618	65728913	8.98880003752292	4.26199388758435	1.15830193475555	3.6795189230896	0.000233674350525578	0.00608446588041267	6	64	standard ATAC-Seq in frozen liver
peak_27228	chr13	66811426	66811632	8.98880003752292	4.26199388758435	1.15830193475555	3.6795189230896	0.000233674350525578	0.00608446588041267	3	45.5	standard ATAC-Seq in frozen liver
peak_23972	chr12	116443482	116443736	9.74839824361197	3.31175310769977	0.900432923903191	3.67795648047165	0.000235110061299429	0.00610549656272453	7	59	standard ATAC-Seq in frozen liver
peak_86373	chr6	142488519	142489059	9.74839824361197	3.31175310769977	0.900432923903191	3.67795648047165	0.000235110061299429	0.00610549656272453	15	124	standard ATAC-Seq in frozen liver
peak_27134	chr13	65569539	65569757	9.01347877469385	4.26752622205665	1.16171419851905	3.67347341325163	0.000239275583630029	0.00620011912716542	3.5	48	standard ATAC-Seq in frozen liver
peak_30166	chr14	27991340	27991905	10.2373769480491	3.03425955231169	0.826669957743455	3.67046065227077	0.000242113739870852	0.00624943307459547	23.5	132	standard ATAC-Seq in frozen liver
peak_8646	chr10	33582594	33582984	10.7109358106586	5.55777456557492	1.51939274245891	3.65789200531556	0.000254298146715653	0.00647662082382173	4	105.5	standard ATAC-Seq in frozen liver
peak_89313	chr7	76952029	76952785	10.721892990438	5.55725590460684	1.51935017977839	3.65765310628879	0.000254535216584116	0.00647675107589635	7	202	standard ATAC-Seq in frozen liver
peak_104191	chrUn_random	4055803	4056119	10.7153903002773	5.55816299462178	1.51960058000407	3.65764732375063	0.000254540957415796	0.00647675107589635	2	86	standard ATAC-Seq in frozen liver
peak_74536	chr5	28425698	28426027	10.7129840112004	5.55648257236547	1.51931365628457	3.65723203328117	0.000254953570254232	0.00648465859759611	2	88	standard ATAC-Seq in frozen liver
peak_47039	chr18	33363229	33363438	10.4106898674549	-3.53284237878796	0.966409816881418	-3.65563585662691	0.000256545300805017	0.0064995730686538	71	4.5	FFPE-ATAC in frozen liver
peak_68862	chr4	61179913	61180367	10.4041871772943	-3.53219160680771	0.96633750019612	-3.65523598752076	0.000256945513193509	0.00650508907088083	154.5	10.5	FFPE-ATAC in frozen liver
peak_64310	chr3	98447733	98448483	10.4086416669131	-3.53125114853603	0.966101540570981	-3.65515528155457	0.000257026359416556	0.00650559570405848	251	17	FFPE-ATAC in frozen liver
peak_3247	chr1	96478635	96478927	4.96959342411561	5.92195027952527	1.62036332132111	3.65470521432008	0.000257477646395276	0.00650623866442922	2	38	standard ATAC-Seq in frozen liver
peak_23990	chr12	116612735	116613095	4.96959342411561	5.92195027952527	1.62036332132111	3.65470521432008	0.000257477646395276	0.00650623866442922	2.5	47	standard ATAC-Seq in frozen liver
peak_55991	chr2	71811824	71812682	4.96959342411561	5.92195027952527	1.62036332132111	3.65470521432008	0.000257477646395276	0.00650623866442922	6	107	standard ATAC-Seq in frozen liver
peak_60762	chr2	179305476	179305936	4.96959342411561	5.92195027952527	1.62036332132111	3.65470521432008	0.000257477646395276	0.00650623866442922	1.5	58	standard ATAC-Seq in frozen liver
peak_66292	chr3	145362398	145362750	4.96959342411561	5.92195027952527	1.62036332132111	3.65470521432008	0.000257477646395276	0.00650623866442922	1	43.5	standard ATAC-Seq in frozen liver
peak_104374	chrX	5995325	5995588	4.96959342411561	5.92195027952527	1.62036332132111	3.65470521432008	0.000257477646395276	0.00650623866442922	1	33	standard ATAC-Seq in frozen liver
peak_104818	chrX	30631991	30632306	4.96959342411561	5.92195027952527	1.62036332132111	3.65470521432008	0.000257477646395276	0.00650623866442922	0	41	standard ATAC-Seq in frozen liver
peak_66792	chr4	3092224	3092582	10.7242992795149	5.55895850656284	1.52117101386628	3.65439418440792	0.000257789953280758	0.00651105333346504	3	94.5	standard ATAC-Seq in frozen liver
peak_21013	chr12	47808947	47809213	4.9740479137344	5.92279202074345	1.62112782892634	3.65350092390065	0.00025868885727093	0.00652305650786109	0.5	34.5	standard ATAC-Seq in frozen liver
peak_43910	chr17	43308080	43308530	4.9740479137344	5.92279202074345	1.62112782892634	3.65350092390065	0.00025868885727093	0.00652305650786109	2.5	57.5	standard ATAC-Seq in frozen liver
peak_80724	chr6	17029248	17029535	4.9740479137344	5.92279202074345	1.62112782892634	3.65350092390065	0.00025868885727093	0.00652305650786109	1	36.5	standard ATAC-Seq in frozen liver
peak_7551	chr10	6822942	6823423	8.94787414293008	3.63236349505014	0.994303221571833	3.65317482257369	0.000259017750552164	0.0065281874207631	11.5	100	standard ATAC-Seq in frozen liver
peak_15928	chr11	69789863	69790121	8.94787414293008	3.63236349505014	0.994303221571833	3.65317482257369	0.000259017750552164	0.0065281874207631	7.5	55	standard ATAC-Seq in frozen liver
peak_68798	chr4	60732497	60732739	10.3976844871337	-3.5315418445384	0.966774427078798	-3.65291193645791	0.000259283172791554	0.0065325232259939	83	6.5	FFPE-ATAC in frozen liver
peak_55487	chr2	60384159	60384533	8.95437683309069	3.63040456461961	0.993862713925782	3.65282298425245	0.000259373040869749	0.0065325232259939	7.5	79	standard ATAC-Seq in frozen liver
peak_81843	chr6	47279210	47279620	8.95437683309069	3.63040456461961	0.993862713925782	3.65282298425245	0.000259373040869749	0.0065325232259939	9	87.5	standard ATAC-Seq in frozen liver
peak_9798	chr10	63055905	63056271	4.96513893449682	5.92110817309365	1.62137555609093	3.65190418151437	0.000260303014229653	0.00653342602620998	2.5	46.5	standard ATAC-Seq in frozen liver
peak_27340	chr13	69565851	69566070	4.96513893449682	5.92110817309365	1.62137555609093	3.65190418151437	0.000260303014229653	0.00653342602620998	0	27	standard ATAC-Seq in frozen liver
peak_62288	chr3	52969920	52970266	4.96513893449682	5.92110817309365	1.62137555609093	3.65190418151437	0.000260303014229653	0.00653342602620998	1.5	44	standard ATAC-Seq in frozen liver
peak_75942	chr5	67240461	67240801	4.96513893449682	5.92110817309365	1.62137555609093	3.65190418151437	0.000260303014229653	0.00653342602620998	1	41.5	standard ATAC-Seq in frozen liver
peak_103563	chr9	115452758	115453088	4.96513893449682	5.92110817309365	1.62137555609093	3.65190418151437	0.000260303014229653	0.00653342602620998	1	41	standard ATAC-Seq in frozen liver
peak_14847	chr11	51269081	51269397	8.95232863254887	3.63284783314423	0.994787474858231	3.65188336700958	0.000260324117962706	0.00653342602620998	7.5	65	standard ATAC-Seq in frozen liver
peak_22992	chr12	101537451	101538082	8.95232863254887	3.63284783314423	0.994787474858231	3.65188336700958	0.000260324117962706	0.00653342602620998	20	134	standard ATAC-Seq in frozen liver
peak_23998	chr12	116648992	116649195	8.95232863254887	3.63284783314423	0.994787474858231	3.65188336700958	0.000260324117962706	0.00653342602620998	5.5	43	standard ATAC-Seq in frozen liver
peak_82971	chr6	72621060	72621527	8.95232863254887	3.63284783314423	0.994787474858231	3.65188336700958	0.000260324117962706	0.00653342602620998	11.5	97	standard ATAC-Seq in frozen liver
peak_23723	chr12	112699648	112700054	8.95883132270948	3.63088158325645	0.994345875075256	3.65152777747647	0.000260684896488059	0.00653342602620998	11.5	85	standard ATAC-Seq in frozen liver
peak_91578	chr7	127972617	127972875	8.94341965331129	3.63188576590404	0.994708067910728	3.65120770914466	0.000261010036303268	0.00653342602620998	5.5	54	standard ATAC-Seq in frozen liver
peak_96511	chr8	97428721	97429203	8.94341965331129	3.63188576590404	0.994708067910728	3.65120770914466	0.000261010036303268	0.00653342602620998	9	103.5	standard ATAC-Seq in frozen liver
peak_12270	chr10	115697732	115698478	9.45226451676543	3.26387385225691	0.893948291009665	3.65107678495648	0.000261143144528454	0.00653342602620998	24.5	158	standard ATAC-Seq in frozen liver
peak_37296	chr15	97421027	97421566	9.45226451676543	3.26387385225691	0.893948291009665	3.65107678495648	0.000261143144528454	0.00653342602620998	14	116.5	standard ATAC-Seq in frozen liver
peak_42065	chr17	10230877	10231358	9.45226451676543	3.26387385225691	0.893948291009665	3.65107678495648	0.000261143144528454	0.00653342602620998	16	105.5	standard ATAC-Seq in frozen liver
peak_43953	chr17	43812190	43812420	9.45226451676543	3.26387385225691	0.893948291009665	3.65107678495648	0.000261143144528454	0.00653342602620998	7	51.5	standard ATAC-Seq in frozen liver
peak_4441	chr1	137527996	137528465	9.44781002714664	3.26341447104746	0.893904991932499	3.65073973240983	0.000261486112570519	0.00653342602620998	14.5	103.5	standard ATAC-Seq in frozen liver
peak_19707	chr11	121546971	121547566	9.44781002714664	3.26341447104746	0.893904991932499	3.65073973240983	0.000261486112570519	0.00653342602620998	18.5	127	standard ATAC-Seq in frozen liver
peak_23713	chr12	112624866	112625476	9.44781002714664	3.26341447104746	0.893904991932499	3.65073973240983	0.000261486112570519	0.00653342602620998	15.5	133.5	standard ATAC-Seq in frozen liver
peak_32967	chr14	104076342	104077301	9.44781002714664	3.26341447104746	0.893904991932499	3.65073973240983	0.000261486112570519	0.00653342602620998	33	210	standard ATAC-Seq in frozen liver
peak_67009	chr4	8942726	8943285	9.44781002714664	3.26341447104746	0.893904991932499	3.65073973240983	0.000261486112570519	0.00653342602620998	16.5	121	standard ATAC-Seq in frozen liver
peak_73125	chr4	146717199	146717782	9.44781002714664	3.26341447104746	0.893904991932499	3.65073973240983	0.000261486112570519	0.00653342602620998	15.5	129.5	standard ATAC-Seq in frozen liver
peak_81981	chr6	48735061	48735744	9.44781002714664	3.26341447104746	0.893904991932499	3.65073973240983	0.000261486112570519	0.00653342602620998	25.5	150	standard ATAC-Seq in frozen liver
peak_84199	chr6	99961601	99962097	9.44781002714664	3.26341447104746	0.893904991932499	3.65073973240983	0.000261486112570519	0.00653342602620998	15	107	standard ATAC-Seq in frozen liver
peak_7050	chr1	192126395	192126635	4.9785024033532	5.92364529542566	1.62370976049017	3.64821684242227	0.000264066724036234	0.00656690684882816	0	30.5	standard ATAC-Seq in frozen liver
peak_12452	chr10	118476867	118477119	4.9785024033532	5.92364529542566	1.62370976049017	3.64821684242227	0.000264066724036234	0.00656690684882816	1	32.5	standard ATAC-Seq in frozen liver
peak_24209	chr13	3434862	3435062	4.9785024033532	5.92364529542566	1.62370976049017	3.64821684242227	0.000264066724036234	0.00656690684882816	1	24.5	standard ATAC-Seq in frozen liver
peak_54627	chr2	34698718	34699466	4.9785024033532	5.92364529542566	1.62370976049017	3.64821684242227	0.000264066724036234	0.00656690684882816	5	97	standard ATAC-Seq in frozen liver
peak_59649	chr2	158522261	158522464	4.9785024033532	5.92364529542566	1.62370976049017	3.64821684242227	0.000264066724036234	0.00656690684882816	1	25.5	standard ATAC-Seq in frozen liver
peak_66415	chr3	147690423	147690623	4.9785024033532	5.92364529542566	1.62370976049017	3.64821684242227	0.000264066724036234	0.00656690684882816	0	25.5	standard ATAC-Seq in frozen liver
peak_73037	chr4	145052680	145053038	4.9785024033532	5.92364529542566	1.62370976049017	3.64821684242227	0.000264066724036234	0.00656690684882816	0.5	45	standard ATAC-Seq in frozen liver
peak_98760	chr9	13658389	13658589	4.9785024033532	5.92364529542566	1.62370976049017	3.64821684242227	0.000264066724036234	0.00656690684882816	0.5	26	standard ATAC-Seq in frozen liver
peak_104324	chrX	3245448	3245679	4.9785024033532	5.92364529542566	1.62370976049017	3.64821684242227	0.000264066724036234	0.00656690684882816	0.5	29	standard ATAC-Seq in frozen liver
peak_106450	chrX	143866659	143866863	4.9785024033532	5.92364529542566	1.62370976049017	3.64821684242227	0.000264066724036234	0.00656690684882816	0.5	26.5	standard ATAC-Seq in frozen liver
peak_11902	chr10	104937480	104938059	9.45671900638422	3.26433522298555	0.89488974601408	3.64775128726772	0.00026454553254427	0.00656690684882816	19.5	128	standard ATAC-Seq in frozen liver
peak_23737	chr12	112830488	112831303	9.45671900638422	3.26433522298555	0.89488974601408	3.64775128726772	0.00026454553254427	0.00656690684882816	27.5	181.5	standard ATAC-Seq in frozen liver
peak_26447	chr13	52180411	52180929	9.45671900638422	3.26433522298555	0.89488974601408	3.64775128726772	0.00026454553254427	0.00656690684882816	20	115	standard ATAC-Seq in frozen liver
peak_36302	chr15	79664508	79665052	9.45671900638422	3.26433522298555	0.89488974601408	3.64775128726772	0.00026454553254427	0.00656690684882816	19.5	119.5	standard ATAC-Seq in frozen liver
peak_53348	chr2	11954963	11955691	9.45671900638422	3.26433522298555	0.89488974601408	3.64775128726772	0.00026454553254427	0.00656690684882816	23.5	159	standard ATAC-Seq in frozen liver
peak_76308	chr5	77832019	77832237	9.45671900638422	3.26433522298555	0.89488974601408	3.64775128726772	0.00026454553254427	0.00656690684882816	7	48	standard ATAC-Seq in frozen liver
peak_81686	chr6	38888446	38888783	9.45671900638422	3.26433522298555	0.89488974601408	3.64775128726772	0.00026454553254427	0.00656690684882816	11	74	standard ATAC-Seq in frozen liver
peak_93867	chr8	27951291	27951615	9.45671900638422	3.26433522298555	0.89488974601408	3.64775128726772	0.00026454553254427	0.00656690684882816	9.5	73	standard ATAC-Seq in frozen liver
peak_18144	chr11	101912867	101913414	8.95678312216766	3.63334312117398	0.996170542931793	3.64731033953365	0.000264999783522257	0.00656934327817918	15	113.5	standard ATAC-Seq in frozen liver
peak_38633	chr16	18733136	18733659	8.95678312216766	3.63334312117398	0.996170542931793	3.64731033953365	0.000264999783522257	0.00656934327817918	11	111	standard ATAC-Seq in frozen liver
peak_83194	chr6	84008652	84009065	8.95678312216766	3.63334312117398	0.996170542931793	3.64731033953365	0.000264999783522257	0.00656934327817918	9	87	standard ATAC-Seq in frozen liver
peak_94943	chr8	64356323	64356799	8.95678312216766	3.63334312117398	0.996170542931793	3.64731033953365	0.000264999783522257	0.00656934327817918	13.5	103	standard ATAC-Seq in frozen liver
peak_16804	chr11	82384998	82385366	9.44335553752785	3.26295303741986	0.894759696984733	3.64673671424377	0.000265591809295729	0.00657913423541255	11	78.5	standard ATAC-Seq in frozen liver
peak_20734	chr12	35705918	35706425	9.44335553752785	3.26295303741986	0.894759696984733	3.64673671424377	0.000265591809295729	0.00657913423541255	16	112.5	standard ATAC-Seq in frozen liver
peak_51949	chr19	44203661	44204339	10.9085775511297	-3.15017138276569	0.863884928629081	-3.64651735244967	0.000265818535238018	0.00658017785643944	231.5	20.5	FFPE-ATAC in frozen liver
peak_68849	chr4	61100076	61100630	10.9085775511297	-3.15017138276569	0.863884928629081	-3.64651735244967	0.000265818535238018	0.00658017785643944	187	17	FFPE-ATAC in frozen liver
peak_38299	chr16	13232915	13233492	8.9389651636925	3.63141040678497	0.996011373379366	3.64595275098513	0.000266402925591609	0.00658815602986477	17	120	standard ATAC-Seq in frozen liver
peak_51888	chr19	43850022	43850463	10.9150802412903	-3.15079788995068	0.864215141776521	-3.64584897630208	0.000266510468446451	0.00658815602986477	149.5	14.5	FFPE-ATAC in frozen liver
peak_70858	chr4	115006382	115007064	10.9150802412903	-3.15079788995068	0.864215141776521	-3.64584897630208	0.000266510468446451	0.00658815602986477	231	23	FFPE-ATAC in frozen liver
peak_99895	chr9	44184350	44184591	10.9150802412903	-3.15079788995068	0.864215141776521	-3.64584897630208	0.000266510468446451	0.00658815602986477	83	8	FFPE-ATAC in frozen liver
peak_22862	chr12	98200586	98200800	4.96068444487803	5.92025383610111	1.62421405356222	3.64499606632318	0.00026739589156127	0.00659658508804725	0	26.5	standard ATAC-Seq in frozen liver
peak_34027	chr15	21888264	21888466	4.96068444487803	5.92025383610111	1.62421405356222	3.64499606632318	0.00026739589156127	0.00659658508804725	0.5	25	standard ATAC-Seq in frozen liver
peak_52325	chr19	50393409	50393706	4.96068444487803	5.92025383610111	1.62421405356222	3.64499606632318	0.00026739589156127	0.00659658508804725	0.5	36	standard ATAC-Seq in frozen liver
peak_92370	chr7	143881173	143881530	4.96068444487803	5.92025383610111	1.62421405356222	3.64499606632318	0.00026739589156127	0.00659658508804725	2.5	45	standard ATAC-Seq in frozen liver
peak_103781	chr9	120637411	120637776	4.96068444487803	5.92025383610111	1.62421405356222	3.64499606632318	0.00026739589156127	0.00659658508804725	0.5	48	standard ATAC-Seq in frozen liver
peak_105230	chrX	53050258	53050461	4.96068444487803	5.92025383610111	1.62421405356222	3.64499606632318	0.00026739589156127	0.00659658508804725	0	25	standard ATAC-Seq in frozen liver
peak_24278	chr13	4233954	4234167	10.9020748609691	-3.1495454158928	0.864077314782089	-3.64498102428147	0.000267411531725569	0.00659658508804725	73.5	6.5	FFPE-ATAC in frozen liver
peak_96399	chr8	95745718	95746366	10.9020748609691	-3.1495454158928	0.864077314782089	-3.64498102428147	0.000267411531725569	0.00659658508804725	222.5	15.5	FFPE-ATAC in frozen liver
peak_1368	chr1	54031869	54032195	8.72830222762671	4.21635712224046	1.15781343213635	3.64165504148679	0.000270890903131551	0.0066577645469499	4	68.5	standard ATAC-Seq in frozen liver
peak_27136	chr13	65585891	65586325	8.72830222762671	4.21635712224046	1.15781343213635	3.64165504148679	0.000270890903131551	0.0066577645469499	7.5	90.5	standard ATAC-Seq in frozen liver
peak_39587	chr16	33676353	33676853	8.72830222762671	4.21635712224046	1.15781343213635	3.64165504148679	0.000270890903131551	0.0066577645469499	9	104	standard ATAC-Seq in frozen liver
peak_83796	chr6	91991229	91991794	8.72830222762671	4.21635712224046	1.15781343213635	3.64165504148679	0.000270890903131551	0.0066577645469499	8.5	119.5	standard ATAC-Seq in frozen liver
peak_13131	chr11	3012891	3013108	9.45876720692604	3.26206743145482	0.895813488732615	3.64145826389592	0.000271098079536746	0.0066577645469499	6.5	47	standard ATAC-Seq in frozen liver
peak_53885	chr2	26398784	26399098	9.45876720692604	3.26206743145482	0.895813488732615	3.64145826389592	0.000271098079536746	0.0066577645469499	9	69	standard ATAC-Seq in frozen liver
peak_92732	chr7	149578981	149579353	9.45876720692604	3.26206743145482	0.895813488732615	3.64145826389592	0.000271098079536746	0.0066577645469499	11.5	81.5	standard ATAC-Seq in frozen liver
peak_71572	chr4	126935241	126935898	9.45431271730725	3.26160543164363	0.895769081402181	3.64112302976356	0.000271451371351693	0.0066577645469499	19.5	143	standard ATAC-Seq in frozen liver
peak_1840	chr1	63477059	63477703	8.7327567172455	4.21684219109636	1.15823532321781	3.64074735640173	0.000271847793433031	0.0066577645469499	10.5	135.5	standard ATAC-Seq in frozen liver
peak_49706	chr19	5408235	5409096	8.7327567172455	4.21684219109636	1.15823532321781	3.64074735640173	0.000271847793433031	0.0066577645469499	15	181	standard ATAC-Seq in frozen liver
peak_57903	chr2	124674395	124674935	8.7327567172455	4.21684219109636	1.15823532321781	3.64074735640173	0.000271847793433031	0.0066577645469499	9	113	standard ATAC-Seq in frozen liver
peak_58462	chr2	133293095	133293765	8.7327567172455	4.21684219109636	1.15823532321781	3.64074735640173	0.000271847793433031	0.0066577645469499	13	139	standard ATAC-Seq in frozen liver
peak_83516	chr6	88097452	88098033	8.7327567172455	4.21684219109636	1.15823532321781	3.64074735640173	0.000271847793433031	0.0066577645469499	12	123.5	standard ATAC-Seq in frozen liver
peak_85872	chr6	134525200	134525768	8.7327567172455	4.21684219109636	1.15823532321781	3.64074735640173	0.000271847793433031	0.0066577645469499	12	121	standard ATAC-Seq in frozen liver
peak_89408	chr7	79310808	79311460	8.7327567172455	4.21684219109636	1.15823532321781	3.64074735640173	0.000271847793433031	0.0066577645469499	12.5	138	standard ATAC-Seq in frozen liver
peak_89496	chr7	80910159	80910773	8.7327567172455	4.21684219109636	1.15823532321781	3.64074735640173	0.000271847793433031	0.0066577645469499	13	128.5	standard ATAC-Seq in frozen liver
peak_52371	chr19	53581876	53582306	9.46117349600302	3.26480258945516	0.896746927426186	3.64071789889004	0.000271878900836273	0.0066577645469499	12.5	94	standard ATAC-Seq in frozen liver
peak_61102	chr3	10143185	10143529	9.46117349600302	3.26480258945516	0.896746927426186	3.64071789889004	0.000271878900836273	0.0066577645469499	12.5	76.5	standard ATAC-Seq in frozen liver
peak_104853	chrX	32068898	32069115	9.46117349600302	3.26480258945516	0.896746927426186	3.64071789889004	0.000271878900836273	0.0066577645469499	7	46.5	standard ATAC-Seq in frozen liver
peak_27152	chr13	65761022	65761311	8.72384773800792	4.215872120148	1.15816815432594	3.64012091370416	0.000272510042081039	0.00666229828265567	6	61	standard ATAC-Seq in frozen liver
peak_39585	chr16	33595338	33595627	8.72384773800792	4.215872120148	1.15816815432594	3.64012091370416	0.000272510042081039	0.00666229828265567	5	61	standard ATAC-Seq in frozen liver
peak_76958	chr5	97275520	97276466	8.72384773800792	4.215872120148	1.15816815432594	3.64012091370416	0.000272510042081039	0.00666229828265567	13.5	195.5	standard ATAC-Seq in frozen liver
peak_94801	chr8	58929087	58929460	8.72384773800792	4.215872120148	1.15816815432594	3.64012091370416	0.000272510042081039	0.00666229828265567	5.5	78.5	standard ATAC-Seq in frozen liver
peak_13250	chr11	4132579	4133036	8.96123761178645	3.63385360698248	0.998481517861359	3.63937994041773	0.00027329531960956	0.0066725863433166	8.5	96	standard ATAC-Seq in frozen liver
peak_24375	chr13	8644063	8644431	8.96123761178645	3.63385360698248	0.998481517861359	3.63937994041773	0.00027329531960956	0.0066725863433166	10	77	standard ATAC-Seq in frozen liver
peak_32976	chr14	104216049	104216543	8.96774030194706	3.63183277045387	0.998031838035595	3.63899490180827	0.000273704217338202	0.00667647246759353	11.5	105	standard ATAC-Seq in frozen liver
peak_95879	chr8	86713575	86713799	8.96774030194706	3.63183277045387	0.998031838035595	3.63899490180827	0.000273704217338202	0.00667647246759353	6	47	standard ATAC-Seq in frozen liver
peak_76208	chr5	75879812	75880204	4.98295689297199	5.92452170512216	1.62825157091991	3.63857883568631	0.000274146709730251	0.00667812642183218	2	50	standard ATAC-Seq in frozen liver
peak_93869	chr8	27975309	27975674	4.98295689297199	5.92452170512216	1.62825157091991	3.63857883568631	0.000274146709730251	0.00667812642183218	1	47.5	standard ATAC-Seq in frozen liver
peak_104808	chrX	30284958	30285333	4.98295689297199	5.92452170512216	1.62825157091991	3.63857883568631	0.000274146709730251	0.00667812642183218	0.5	48.5	standard ATAC-Seq in frozen liver
peak_104843	chrX	31727514	31727905	4.98295689297199	5.92452170512216	1.62825157091991	3.63857883568631	0.000274146709730251	0.00667812642183218	1.5	49.5	standard ATAC-Seq in frozen liver
peak_33372	chr14	121992715	121993009	8.73721120686429	4.21733156036339	1.15944240652435	3.63737908552583	0.000275426418510662	0.00670166684166365	4.5	64	standard ATAC-Seq in frozen liver
peak_50574	chr19	21956595	21957077	8.73721120686429	4.21733156036339	1.15944240652435	3.63737908552583	0.000275426418510662	0.00670166684166365	9	103.5	standard ATAC-Seq in frozen liver
peak_50576	chr19	21965089	21965654	8.73721120686429	4.21733156036339	1.15944240652435	3.63737908552583	0.000275426418510662	0.00670166684166365	8	121	standard ATAC-Seq in frozen liver
peak_28812	chr13	111353172	111353410	8.94101336423431	3.62891656065402	0.997792884337098	3.63694371609491	0.000275892186406432	0.00670990640154473	4.5	51	standard ATAC-Seq in frozen liver
peak_27123	chr13	65476894	65477291	8.71939324838912	4.21538293370067	1.15930781352869	3.63612052339225	0.000276774874287377	0.00672376835107174	8	83.5	standard ATAC-Seq in frozen liver
peak_37649	chr15	101129915	101130364	8.71939324838912	4.21538293370067	1.15930781352869	3.63612052339225	0.000276774874287377	0.00672376835107174	9	93.5	standard ATAC-Seq in frozen liver
peak_51168	chr19	34494742	34495341	8.71939324838912	4.21538293370067	1.15930781352869	3.63612052339225	0.000276774874287377	0.00672376835107174	6.5	125	standard ATAC-Seq in frozen liver
peak_27185	chr13	66324214	66324594	4.95622995525924	5.91937559893259	1.62901381742345	3.63371724390591	0.000279367013478377	0.00677144593879336	2	47.5	standard ATAC-Seq in frozen liver
peak_78047	chr5	116334565	116334797	4.95622995525924	5.91937559893259	1.62901381742345	3.63371724390591	0.000279367013478377	0.00677144593879336	1	29	standard ATAC-Seq in frozen liver
peak_94672	chr8	49332411	49333308	4.95622995525924	5.91937559893259	1.62901381742345	3.63371724390591	0.000279367013478377	0.00677144593879336	5	107	standard ATAC-Seq in frozen liver
peak_8214	chr10	21389527	21389882	8.7217995374661	4.21850096348979	1.16093371962648	3.63371387373181	0.000279370664415754	0.00677144593879336	6	75.5	standard ATAC-Seq in frozen liver
peak_82543	chr6	58556706	58556944	9.45467080584241	3.26665086962732	0.899307903757653	3.63240538193649	0.000280791547884994	0.00679972086487169	7	52.5	standard ATAC-Seq in frozen liver
peak_57201	chr2	105236276	105236807	8.74166569648308	4.21782940627005	1.16146049299878	3.63148762415501	0.000281792172956185	0.00682086310180206	10	114	standard ATAC-Seq in frozen liver
peak_93696	chr8	24394357	24394905	8.74166569648308	4.21782940627005	1.16146049299878	3.63148762415501	0.000281792172956185	0.00682086310180206	9.5	119	standard ATAC-Seq in frozen liver
peak_64305	chr3	98422708	98423122	10.1368285887023	-4.11734090267665	1.13421592585398	-3.63012086924861	0.000283288531298123	0.00684776666369582	136	7.5	FFPE-ATAC in frozen liver
peak_52877	chr1_random	780561	780761	8.71493875877033	4.21488533364339	1.16125804135367	3.62958548707241	0.000283876708263518	0.00685735064490454	2.5	41.5	standard ATAC-Seq in frozen liver
peak_93889	chr8	28199528	28199731	8.96569210140525	3.63438402264662	1.0017702703295	3.62796154995816	0.000285667790712671	0.00688972211795722	5.5	42.5	standard ATAC-Seq in frozen liver
peak_102370	chr9	90121216	90121746	8.96569210140525	3.63438402264662	1.0017702703295	3.62796154995816	0.000285667790712671	0.00688972211795722	14.5	113	standard ATAC-Seq in frozen liver
peak_85186	chr6	122089368	122089579	10.8935239702666	-3.14739264182119	0.867585128414775	-3.62776232410992	0.00028588824975451	0.00689193046449448	73.5	6	FFPE-ATAC in frozen liver
peak_18739	chr11	109564479	109564823	10.8825667904872	-3.14763814192153	0.86784105179579	-3.62697539533102	0.000286760607471042	0.00690566122813331	118.5	10.5	FFPE-ATAC in frozen liver
peak_57655	chr2	119137197	119137664	10.4435772220666	5.51857948757302	1.52179111757098	3.62637120420412	0.000287432081327868	0.00691200794808205	5.5	120.5	standard ATAC-Seq in frozen liver
peak_46056	chr18	3118947	3119255	10.4415290215248	5.51991645719141	1.52246835379646	3.62563625275154	0.000288250862718897	0.00691811493192763	2	81	standard ATAC-Seq in frozen liver
peak_73085	chr4	146032651	146032851	10.4415290215248	5.51991645719141	1.52246835379646	3.62563625275154	0.000288250862718897	0.00691811493192763	2	53	standard ATAC-Seq in frozen liver
peak_73116	chr4	146606506	146606736	10.4415290215248	5.51991645719141	1.52246835379646	3.62563625275154	0.000288250862718897	0.00691811493192763	2	60.5	standard ATAC-Seq in frozen liver
peak_70282	chr4	103054434	103054902	10.1173205182205	-4.11536360885902	1.13534435359561	-3.62477128267364	0.000289217291917435	0.0069300040287606	157.5	6.5	FFPE-ATAC in frozen liver
peak_92362	chr7	143126925	143127187	4.98741138259078	5.92543282389795	1.63493477086061	3.62426252686453	0.00028978714057689	0.00693926116999521	0	35	standard ATAC-Seq in frozen liver
peak_1844	chr1	63525471	63525881	8.74612018610187	4.21833980624247	1.16433382705692	3.62296422917227	0.000291246112113461	0.00695679427815533	7.5	86	standard ATAC-Seq in frozen liver
peak_23025	chr12	101772262	101772703	8.74612018610187	4.21833980624247	1.16433382705692	3.62296422917227	0.000291246112113461	0.00695679427815533	6	93	standard ATAC-Seq in frozen liver
peak_48804	chr18	69575176	69575575	8.74612018610187	4.21833980624247	1.16433382705692	3.62296422917227	0.000291246112113461	0.00695679427815533	9	84	standard ATAC-Seq in frozen liver
peak_94181	chr8	37272911	37273365	8.74612018610187	4.21833980624247	1.16433382705692	3.62296422917227	0.000291246112113461	0.00695679427815533	9	97	standard ATAC-Seq in frozen liver
peak_49707	chr19	5414574	5415135	10.4302137532102	5.51737089514126	1.52293790602541	3.62284691536808	0.000291378282774217	0.0069583970928075	5.5	147	standard ATAC-Seq in frozen liver
peak_26653	chr13	55584776	55585000	4.95177546564045	5.91846145723001	1.63603238090788	3.6175698759371	0.000297382059859546	0.00704669623295368	0.5	27.5	standard ATAC-Seq in frozen liver
peak_4758	chr1	141980937	141981158	10.9174865303672	-3.14836695227474	0.870817254068471	-3.61541636613828	0.000299865274604412	0.00707106782820755	75.5	6.5	FFPE-ATAC in frozen liver
peak_7397	chr10	3056110	3056702	8.97014659102404	3.63493840437374	1.00609298028327	3.61292492404657	0.000302762385554354	0.00711931382948582	15.5	123	standard ATAC-Seq in frozen liver
peak_52576	chr19	56608291	56608663	10.1846152619909	-3.49857959107785	0.969408552765648	-3.60898362315525	0.000307399012635525	0.00718220297405078	122	10	FFPE-ATAC in frozen liver
peak_16724	chr11	79994229	79994510	10.1781125718303	-3.49791394057913	0.969595983244238	-3.60759945485255	0.000309043091762852	0.00720487446915799	92.5	5	FFPE-ATAC in frozen liver
peak_70851	chr4	114971484	114973470	10.1825670614491	-3.49695134000897	0.9693597793621	-3.60748549141392	0.00030917882076524	0.00720646772315039	650	42	FFPE-ATAC in frozen liver
peak_87083	chr7	15031691	15032251	10.1760643712885	-3.49627908210249	0.970081238372369	-3.60410957742946	0.000313224897862802	0.00728290542915777	183	11.5	FFPE-ATAC in frozen liver
peak_30864	chr14	44517736	44517943	9.42348937851087	3.2634195828063	0.905717034560936	3.60313371426022	0.000314403686132631	0.00729166688054068	7.5	44	standard ATAC-Seq in frozen liver
peak_104146	chrUn_random	3396405	3396695	8.75502916533945	4.21941343403504	1.17288653507671	3.59746088632441	0.000321338799413199	0.00741394819211394	4	62	standard ATAC-Seq in frozen liver
peak_188	chr1	10980877	10981248	10.1652614536952	5.47883767267003	1.52426112737553	3.59442196239925	0.000325112569913179	0.00748647999869626	3.5	93	standard ATAC-Seq in frozen liver
peak_93067	chr8	8819118	8819936	10.1652614536952	5.47883767267003	1.52426112737553	3.59442196239925	0.000325112569913179	0.00748647999869626	10	209	standard ATAC-Seq in frozen liver
peak_93773	chr8	26371717	26372159	10.1632132531534	5.48021135235005	1.52475440614145	3.59416003670932	0.000325439766411583	0.00749240111523968	4.5	113	standard ATAC-Seq in frozen liver
peak_13485	chr11	7074827	7075363	10.1608069640764	5.47842644406809	1.52444889111427	3.59370948806537	0.00032600331104503	0.00749891763386632	6	135	standard ATAC-Seq in frozen liver
peak_48997	chr18	75278828	75279556	10.6890056358263	-3.11732532854861	0.867543829816416	-3.59327704423681	0.000326545069113699	0.00750589439276702	242.5	24	FFPE-ATAC in frozen liver
peak_68290	chr4	52673526	52674092	10.1676677427722	5.4806290687905	1.52541953812047	3.59286670442374	0.000327059914632214	0.00751103268871184	4	143.5	standard ATAC-Seq in frozen liver
peak_69891	chr4	96323978	96324387	10.6825029456657	-3.11668385843069	0.867470460043052	-3.59284148796952	0.000327091577998502	0.00751103268871184	136	13	FFPE-ATAC in frozen liver
peak_83562	chr6	88700146	88700461	10.6825029456657	-3.11668385843069	0.867470460043052	-3.59284148796952	0.000327091577998502	0.00751103268871184	105.5	8	FFPE-ATAC in frozen liver
peak_100249	chr9	50478215	50478535	10.6760002555051	-3.11604123612526	0.867944785423717	-3.5901376313979	0.000330503405377415	0.00757310984950834	109.5	8	FFPE-ATAC in frozen liver
peak_106190	chrX	131588476	131589018	10.1765767220098	5.48149399627247	1.52808654194076	3.58716201329191	0.000334296629384747	0.00761808017200478	5	137.5	standard ATAC-Seq in frozen liver
peak_14725	chr11	49432063	49432341	8.6740128641775	3.5837278062164	0.999149552638538	3.58677817224914	0.000334788893450603	0.00761808017200478	5.5	57	standard ATAC-Seq in frozen liver
peak_27151	chr13	65751352	65751736	8.6740128641775	3.5837278062164	0.999149552638538	3.58677817224914	0.000334788893450603	0.00761808017200478	9	78.5	standard ATAC-Seq in frozen liver
peak_83230	chr6	84836209	84837107	8.6740128641775	3.5837278062164	0.999149552638538	3.58677817224914	0.000334788893450603	0.00761808017200478	23.5	184	standard ATAC-Seq in frozen liver
peak_99448	chr9	32568945	32569332	8.66955837455871	3.58323138008751	0.999110479811197	3.58642157448358	0.000335246826550271	0.00761808017200478	7	80.5	standard ATAC-Seq in frozen liver
peak_32414	chr14	73903164	73903761	8.6805155543381	3.58171469702769	0.9986998964798	3.5863773588567	0.000335303647871882	0.00761808017200478	13.5	119.5	standard ATAC-Seq in frozen liver
peak_7343	chr1	196478249	196478801	8.45444094887412	4.16769697738334	1.16211277133848	3.58631027915057	0.000335389868934229	0.00761808017200478	11.5	111.5	standard ATAC-Seq in frozen liver
peak_11121	chr10	86477294	86477747	8.45444094887412	4.16769697738334	1.16211277133848	3.58631027915057	0.000335389868934229	0.00761808017200478	7	93	standard ATAC-Seq in frozen liver
peak_24121	chr12	118895403	118895801	8.45444094887412	4.16769697738334	1.16211277133848	3.58631027915057	0.000335389868934229	0.00761808017200478	7.5	81.5	standard ATAC-Seq in frozen liver
peak_35694	chr15	73366034	73366691	8.45444094887412	4.16769697738334	1.16211277133848	3.58631027915057	0.000335389868934229	0.00761808017200478	12	134.5	standard ATAC-Seq in frozen liver
peak_41001	chr16	85546776	85547348	8.45444094887412	4.16769697738334	1.16211277133848	3.58631027915057	0.000335389868934229	0.00761808017200478	9	119	standard ATAC-Seq in frozen liver
peak_57887	chr2	124380588	124381237	8.45444094887412	4.16769697738334	1.16211277133848	3.58631027915057	0.000335389868934229	0.00761808017200478	11.5	131	standard ATAC-Seq in frozen liver
peak_61955	chr3	38836094	38836555	8.45444094887412	4.16769697738334	1.16211277133848	3.58631027915057	0.000335389868934229	0.00761808017200478	7.5	95	standard ATAC-Seq in frozen liver
peak_66551	chr3	151087189	151088136	8.45444094887412	4.16769697738334	1.16211277133848	3.58631027915057	0.000335389868934229	0.00761808017200478	16.5	194	standard ATAC-Seq in frozen liver
peak_76698	chr5	91201089	91201722	8.45444094887412	4.16769697738334	1.16211277133848	3.58631027915057	0.000335389868934229	0.00761808017200478	13.5	125.5	standard ATAC-Seq in frozen liver
peak_77145	chr5	101139030	101139420	8.45444094887412	4.16769697738334	1.16211277133848	3.58631027915057	0.000335389868934229	0.00761808017200478	7.5	79	standard ATAC-Seq in frozen liver
peak_81587	chr6	37682293	37682924	8.45444094887412	4.16769697738334	1.16211277133848	3.58631027915057	0.000335389868934229	0.00761808017200478	12.5	128.5	standard ATAC-Seq in frozen liver
peak_82446	chr6	55285236	55285610	8.45444094887412	4.16769697738334	1.16211277133848	3.58631027915057	0.000335389868934229	0.00761808017200478	5	77.5	standard ATAC-Seq in frozen liver
peak_87264	chr7	19510543	19510992	8.45444094887412	4.16769697738334	1.16211277133848	3.58631027915057	0.000335389868934229	0.00761808017200478	6.5	92.5	standard ATAC-Seq in frozen liver
peak_22646	chr12	87823032	87823304	8.67606106471931	3.5812189761328	0.998660911397289	3.58602097595078	0.000335761963222773	0.00761808017200478	7	56	standard ATAC-Seq in frozen liver
peak_46613	chr18	14070040	14070505	8.67606106471931	3.5812189761328	0.998660911397289	3.58602097595078	0.000335761963222773	0.00761808017200478	9	93.5	standard ATAC-Seq in frozen liver
peak_28810	chr13	111328245	111328658	8.44998645925533	4.16719626866454	1.16208003939796	3.58598042078363	0.00033581415508683	0.00761808017200478	6	82	standard ATAC-Seq in frozen liver
peak_45123	chr17	73421616	73422123	8.44998645925533	4.16719626866454	1.16208003939796	3.58598042078363	0.00033581415508683	0.00761808017200478	8.5	101.5	standard ATAC-Seq in frozen liver
peak_64640	chr3	104826339	104826694	8.44998645925533	4.16719626866454	1.16208003939796	3.58598042078363	0.00033581415508683	0.00761808017200478	6.5	72.5	standard ATAC-Seq in frozen liver
peak_65020	chr3	115864862	115865510	8.44998645925533	4.16719626866454	1.16208003939796	3.58598042078363	0.00033581415508683	0.00761808017200478	11	132.5	standard ATAC-Seq in frozen liver
peak_67424	chr4	31353646	31354216	8.44998645925533	4.16719626866454	1.16208003939796	3.58598042078363	0.00033581415508683	0.00761808017200478	8.5	116.5	standard ATAC-Seq in frozen liver
peak_80085	chr5	148469443	148469976	8.44998645925533	4.16719626866454	1.16208003939796	3.58598042078363	0.00033581415508683	0.00761808017200478	7	110	standard ATAC-Seq in frozen liver
peak_92986	chr8	3742704	3743160	8.44998645925533	4.16719626866454	1.16208003939796	3.58598042078363	0.00033581415508683	0.00761808017200478	6	95	standard ATAC-Seq in frozen liver
peak_96520	chr8	97523878	97524184	8.44998645925533	4.16719626866454	1.16208003939796	3.58598042078363	0.00033581415508683	0.00761808017200478	4	62	standard ATAC-Seq in frozen liver
peak_36459	chr15	81705131	81705476	10.6869574352845	-3.11579719035261	0.869041977868523	-3.58532414969717	0.00033665978932956	0.00763078872639124	116.5	8.5	FFPE-ATAC in frozen liver
peak_2749	chr1	88755439	88755902	8.45889543849291	4.16820001872085	1.16297517873123	3.58408338797758	0.00033826401246609	0.00765443945187232	7	94	standard ATAC-Seq in frozen liver
peak_77078	chr5	100001455	100002203	8.45889543849291	4.16820001872085	1.16297517873123	3.58408338797758	0.00033826401246609	0.00765443945187232	8.5	157	standard ATAC-Seq in frozen liver
peak_89308	chr7	76219595	76220223	8.45889543849291	4.16820001872085	1.16297517873123	3.58408338797758	0.00033826401246609	0.00765443945187232	7	127	standard ATAC-Seq in frozen liver
peak_103538	chr9	114957422	114957985	8.45889543849291	4.16820001872085	1.16297517873123	3.58408338797758	0.00033826401246609	0.00765443945187232	6.5	115	standard ATAC-Seq in frozen liver
peak_23438	chr12	106787110	106787501	8.67846735379629	3.58423353542899	1.00013686783656	3.58374303627282	0.000338705313180971	0.00765443945187232	10	81.5	standard ATAC-Seq in frozen liver
peak_41064	chr16	87324773	87325186	8.67846735379629	3.58423353542899	1.00013686783656	3.58374303627282	0.000338705313180971	0.00765443945187232	9	84.5	standard ATAC-Seq in frozen liver
peak_84447	chr6	112277806	112278154	8.67846735379629	3.58423353542899	1.00013686783656	3.58374303627282	0.000338705313180971	0.00765443945187232	9	71.5	standard ATAC-Seq in frozen liver
peak_85961	chr6	136280604	136280839	8.67846735379629	3.58423353542899	1.00013686783656	3.58374303627282	0.000338705313180971	0.00765443945187232	5.5	47.5	standard ATAC-Seq in frozen liver
peak_24069	chr12	117237370	117237672	8.68497004395689	3.58220568501607	0.999685059126485	3.5833342234265	0.000339236092805753	0.00766037293930051	7	61	standard ATAC-Seq in frozen liver
peak_27182	chr13	66246015	66246545	8.68497004395689	3.58220568501607	0.999685059126485	3.5833342234265	0.000339236092805753	0.00766037293930051	13	107.5	standard ATAC-Seq in frozen liver
peak_54255	chr2	30532475	30533050	8.68497004395689	3.58220568501607	0.999685059126485	3.5833342234265	0.000339236092805753	0.00766037293930051	15.5	115	standard ATAC-Seq in frozen liver
peak_106337	chrX	137711014	137711325	8.44553196963654	4.166693336813	1.16287686462024	3.58309074983079	0.000339552574877155	0.00766037293930051	6.5	63	standard ATAC-Seq in frozen liver
peak_69038	chr4	62393261	62393481	8.66510388493992	3.58273965712175	1.00001947225858	3.58266989444716	0.000340100280293046	0.00766672858695916	5.5	45	standard ATAC-Seq in frozen liver
peak_47453	chr18	39066030	39066464	8.67160657510052	3.58071392046148	0.999567926165307	3.58226172202058	0.00034063226943229	0.0076768965776227	10	90.5	standard ATAC-Seq in frozen liver
peak_106916	chrY_random	17610751	17611725	5.34775824920823	-5.71836178278994	1.59656849069394	-3.58165767151305	0.000341420983839884	0.00768981014971638	179	0	FFPE-ATAC in frozen liver
peak_2031	chr1	69503236	69503573	9.17394874839406	3.21633710775182	0.89858311971436	3.57934289793272	0.000344459250873255	0.00772019923115538	12	70.5	standard ATAC-Seq in frozen liver
peak_7673	chr10	8637220	8637905	9.17394874839406	3.21633710775182	0.89858311971436	3.57934289793272	0.000344459250873255	0.00772019923115538	20	145.5	standard ATAC-Seq in frozen liver
peak_25860	chr13	41429979	41430260	9.17394874839406	3.21633710775182	0.89858311971436	3.57934289793272	0.000344459250873255	0.00772019923115538	9	59.5	standard ATAC-Seq in frozen liver
peak_33064	chr14	112917982	112918337	9.17394874839406	3.21633710775182	0.89858311971436	3.57934289793272	0.000344459250873255	0.00772019923115538	12.5	74	standard ATAC-Seq in frozen liver
peak_35495	chr15	65664861	65665228	9.17394874839406	3.21633710775182	0.89858311971436	3.57934289793272	0.000344459250873255	0.00772019923115538	10	77	standard ATAC-Seq in frozen liver
peak_41541	chr16	95625040	95625511	9.17394874839406	3.21633710775182	0.89858311971436	3.57934289793272	0.000344459250873255	0.00772019923115538	11.5	99.5	standard ATAC-Seq in frozen liver
peak_43691	chr17	35355507	35356113	9.17394874839406	3.21633710775182	0.89858311971436	3.57934289793272	0.000344459250873255	0.00772019923115538	20	129.5	standard ATAC-Seq in frozen liver
peak_51053	chr19	32377484	32377869	9.17394874839406	3.21633710775182	0.89858311971436	3.57934289793272	0.000344459250873255	0.00772019923115538	13.5	80.5	standard ATAC-Seq in frozen liver
peak_72431	chr4	137054292	137054585	9.17394874839406	3.21633710775182	0.89858311971436	3.57934289793272	0.000344459250873255	0.00772019923115538	10	62	standard ATAC-Seq in frozen liver
peak_93553	chr8	22151228	22152160	9.17394874839406	3.21633710775182	0.89858311971436	3.57934289793272	0.000344459250873255	0.00772019923115538	31.5	194	standard ATAC-Seq in frozen liver
peak_95824	chr8	86180783	86181158	9.17394874839406	3.21633710775182	0.89858311971436	3.57934289793272	0.000344459250873255	0.00772019923115538	13.5	79.5	standard ATAC-Seq in frozen liver
peak_102543	chr9	96279911	96280267	9.17394874839406	3.21633710775182	0.89858311971436	3.57934289793272	0.000344459250873255	0.00772019923115538	12	74	standard ATAC-Seq in frozen liver
peak_102779	chr9	102611976	102612714	9.17394874839406	3.21633710775182	0.89858311971436	3.57934289793272	0.000344459250873255	0.00772019923115538	24	159.5	standard ATAC-Seq in frozen liver
peak_9376	chr10	56188790	56189308	8.46334992811171	4.16870990937908	1.16468646293897	3.57925505449746	0.000344575046805231	0.00772019923115538	9.5	108	standard ATAC-Seq in frozen liver
peak_46169	chr18	5389862	5390740	8.46334992811171	4.16870990937908	1.16468646293897	3.57925505449746	0.000344575046805231	0.00772019923115538	11.5	176.5	standard ATAC-Seq in frozen liver
peak_102203	chr9	84871019	84871675	8.46334992811171	4.16870990937908	1.16468646293897	3.57925505449746	0.000344575046805231	0.00772019923115538	8	133	standard ATAC-Seq in frozen liver
peak_4923	chr1	152984055	152984275	10.2061715330146	-3.5023946892804	0.978600861989172	-3.57898181507953	0.000344935466069775	0.00772665559405858	71	5.5	FFPE-ATAC in frozen liver
peak_26652	chr13	55580415	55580806	9.17840323801285	3.2168117046166	0.899101379986082	3.57780754898451	0.000346488411968369	0.00774907960995076	12	81.5	standard ATAC-Seq in frozen liver
peak_32235	chr14	70591477	70592201	9.17840323801285	3.2168117046166	0.899101379986082	3.57780754898451	0.000346488411968369	0.00774907960995076	21.5	152	standard ATAC-Seq in frozen liver
peak_41533	chr16	95568778	95569195	9.17840323801285	3.2168117046166	0.899101379986082	3.57780754898451	0.000346488411968369	0.00774907960995076	10.5	88	standard ATAC-Seq in frozen liver
peak_77858	chr5	114368484	114369114	9.17840323801285	3.2168117046166	0.899101379986082	3.57780754898451	0.000346488411968369	0.00774907960995076	16.5	132	standard ATAC-Seq in frozen liver
peak_98859	chr9	15536665	15537248	9.17840323801285	3.2168117046166	0.899101379986082	3.57780754898451	0.000346488411968369	0.00774907960995076	21	123.5	standard ATAC-Seq in frozen liver
peak_14724	chr11	49429367	49429584	8.44348376909473	4.16940150794831	1.16536267403075	3.57777162497166	0.000346536023772488	0.00774907960995076	3.5	44	standard ATAC-Seq in frozen liver
peak_12274	chr10	115725071	115725530	8.68292184341508	3.58475329627649	1.00209408992639	3.57726218756544	0.000347211864500185	0.00775333140125288	11	96.5	standard ATAC-Seq in frozen liver
peak_58790	chr2	145530464	145530872	8.68292184341508	3.58475329627649	1.00209408992639	3.57726218756544	0.000347211864500185	0.00775333140125288	9.5	82.5	standard ATAC-Seq in frozen liver
peak_76142	chr5	74669242	74669731	8.68292184341508	3.58475329627649	1.00209408992639	3.57726218756544	0.000347211864500185	0.00775333140125288	11	101.5	standard ATAC-Seq in frozen liver
peak_2652	chr1	87544185	87544507	9.16949425877527	3.21586247139375	0.89901463158184	3.57709692192146	0.000347431377465694	0.00775333140125288	9.5	68.5	standard ATAC-Seq in frozen liver
peak_11880	chr10	102131133	102131481	9.16949425877527	3.21586247139375	0.89901463158184	3.57709692192146	0.000347431377465694	0.00775333140125288	10	73.5	standard ATAC-Seq in frozen liver
peak_31112	chr14	48691750	48692158	9.16949425877527	3.21586247139375	0.89901463158184	3.57709692192146	0.000347431377465694	0.00775333140125288	11	85.5	standard ATAC-Seq in frozen liver
peak_84715	chr6	115834165	115834513	9.16949425877527	3.21586247139375	0.89901463158184	3.57709692192146	0.000347431377465694	0.00775333140125288	11.5	73.5	standard ATAC-Seq in frozen liver
peak_104558	chrX	11737028	11737385	9.16949425877527	3.21586247139375	0.89901463158184	3.57709692192146	0.000347431377465694	0.00775333140125288	11.5	75.5	standard ATAC-Seq in frozen liver
peak_80963	chr6	24521117	24521610	8.68942453357569	3.58269641174356	1.00163804937678	3.57683737550978	0.000347776380256045	0.00775779272594934	11	100	standard ATAC-Seq in frozen liver
peak_83813	chr6	92415564	92416037	8.68942453357569	3.58269641174356	1.00163804937678	3.57683737550978	0.000347776380256045	0.00775779272594934	9.5	96.5	standard ATAC-Seq in frozen liver
peak_27146	chr13	65718740	65718948	8.46539812865352	4.16597810355222	1.16494177228749	3.57612560786781	0.000348724144475474	0.00777445327983747	4	43	standard ATAC-Seq in frozen liver
peak_74732	chr5	32029870	32030199	8.66064939532112	3.58224813868933	1.00189789421864	3.57546228948114	0.00034960956974211	0.0077856929984697	8.5	66	standard ATAC-Seq in frozen liver
peak_85873	chr6	134544822	134545265	8.66064939532112	3.58224813868933	1.00189789421864	3.57546228948114	0.00034960956974211	0.0077856929984697	12.5	90	standard ATAC-Seq in frozen liver
peak_4602	chr1	139458221	139458726	8.66715208548173	3.58019476977887	1.00144228950465	3.57503852922945	0.000350176323047118	0.00779506782063608	12.5	103.5	standard ATAC-Seq in frozen liver
peak_20550	chr12	30636966	30637371	9.18285772763164	3.21729057365069	0.900579279141965	3.57246790834006	0.000353632830228578	0.00784587992361284	12.5	84.5	standard ATAC-Seq in frozen liver
peak_80803	chr6	17981244	17982137	9.18285772763164	3.21729057365069	0.900579279141965	3.57246790834006	0.000353632830228578	0.00784587992361284	23.5	189.5	standard ATAC-Seq in frozen liver
peak_90334	chr7	105232978	105233369	9.16744605823346	3.21818467224762	0.901167728061906	3.57112729632341	0.000355448078032243	0.00787621736507355	14	81.5	standard ATAC-Seq in frozen liver
peak_9538	chr10	59391811	59392344	9.16503976915648	3.21538346539403	0.900405501872229	3.57103933584171	0.000355567484521332	0.00787621736507355	18	109.5	standard ATAC-Seq in frozen liver
peak_75033	chr5	36732972	36733537	9.16503976915648	3.21538346539403	0.900405501872229	3.57103933584171	0.000355567484521332	0.00787621736507355	19.5	119.5	standard ATAC-Seq in frozen liver
peak_97188	chr8	114015021	114015491	9.16503976915648	3.21538346539403	0.900405501872229	3.57103933584171	0.000355567484521332	0.00787621736507355	15.5	99.5	standard ATAC-Seq in frozen liver
peak_20272	chr12	21160912	21161334	8.68737633303387	3.58529161925684	1.00506529238241	3.56722259382598	0.000360784994709488	0.00796029013607954	11	85.5	standard ATAC-Seq in frozen liver
peak_32415	chr14	73906100	73906459	9.17599694893587	3.21400225131217	0.900984335036608	3.5672121326966	0.000360799393014499	0.00796029013607954	12.5	75	standard ATAC-Seq in frozen liver
peak_23948	chr12	116049737	116049960	8.69387902319448	3.58319130456407	1.00460300908909	3.56677341412015	0.000361403712766856	0.00796857378947325	4	45.5	standard ATAC-Seq in frozen liver
peak_66864	chr4	5984870	5985336	8.65619490570233	3.58175240071382	1.00478965665257	3.56467881312228	0.000364302022712893	0.00800444562773571	10	96.5	standard ATAC-Seq in frozen liver
peak_79165	chr5	135941643	135942174	8.65619490570233	3.58175240071382	1.00478965665257	3.56467881312228	0.000364302022712893	0.00800444562773571	11	106.5	standard ATAC-Seq in frozen liver
peak_84582	chr6	114501474	114501738	8.66269759586294	3.5796569891467	1.00432798024669	3.56423106749196	0.000364924383392264	0.00800682895809937	5	53	standard ATAC-Seq in frozen liver
peak_85536	chr6	127102505	127102744	9.18731221725043	3.21777781653492	0.903009906679589	3.56339148965358	0.000366094066388282	0.00802248634538863	8	52	standard ATAC-Seq in frozen liver
peak_27132	chr13	65551882	65552184	9.15853707899587	3.21724708749386	0.903040776688381	3.56268196358985	0.000367085295842223	0.00804194860005476	9.5	63.5	standard ATAC-Seq in frozen liver
peak_106120	chrX	123302261	123303690	9.88044299516323	5.43896006114849	1.52706293617886	3.56171309792791	0.000368442883640228	0.00805624621058323	16.5	352	standard ATAC-Seq in frozen liver
peak_28953	chr13	113225967	113226278	9.88694568532383	5.43797016466584	1.52680041219066	3.56167716569019	0.000368493322540096	0.00805624621058323	1.5	77	standard ATAC-Seq in frozen liver
peak_6418	chr1	181038559	181039143	4.69573214536303	5.83994589967554	1.64120648248596	3.55832490426779	0.000373227466296184	0.00811231138582269	3.5	72	standard ATAC-Seq in frozen liver
peak_20324	chr12	22159970	22160177	4.69573214536303	5.83994589967554	1.64120648248596	3.55832490426779	0.000373227466296184	0.00811231138582269	0.5	24	standard ATAC-Seq in frozen liver
peak_29263	chr14	6301684	6301884	4.69573214536303	5.83994589967554	1.64120648248596	3.55832490426779	0.000373227466296184	0.00811231138582269	1	23.5	standard ATAC-Seq in frozen liver
peak_41988	chr17	8103915	8104527	4.69573214536303	5.83994589967554	1.64120648248596	3.55832490426779	0.000373227466296184	0.00811231138582269	3	72	standard ATAC-Seq in frozen liver
peak_55034	chr2	46376750	46377281	4.69573214536303	5.83994589967554	1.64120648248596	3.55832490426779	0.000373227466296184	0.00811231138582269	3.5	63.5	standard ATAC-Seq in frozen liver
peak_72548	chr4	138125921	138126274	4.69573214536303	5.83994589967554	1.64120648248596	3.55832490426779	0.000373227466296184	0.00811231138582269	2.5	42.5	standard ATAC-Seq in frozen liver
peak_72957	chr4	144347106	144347312	4.69573214536303	5.83994589967554	1.64120648248596	3.55832490426779	0.000373227466296184	0.00811231138582269	0.5	24.5	standard ATAC-Seq in frozen liver
peak_102476	chr9	94893581	94893974	4.69573214536303	5.83994589967554	1.64120648248596	3.55832490426779	0.000373227466296184	0.00811231138582269	1.5	45.5	standard ATAC-Seq in frozen liver
peak_104364	chrX	4917730	4918389	4.69573214536303	5.83994589967554	1.64120648248596	3.55832490426779	0.000373227466296184	0.00811231138582269	3.5	82	standard ATAC-Seq in frozen liver
peak_106426	chrX	140961344	140961631	4.69573214536303	5.83994589967554	1.64120648248596	3.55832490426779	0.000373227466296184	0.00811231138582269	1	36	standard ATAC-Seq in frozen liver
peak_581	chr1	28912246	28912708	4.69127765574424	5.83903277576891	1.64147067176588	3.55719591961234	0.000374834602218965	0.00812742042309284	0.5	52.5	standard ATAC-Seq in frozen liver
peak_6252	chr1	175891650	175891947	4.69127765574424	5.83903277576891	1.64147067176588	3.55719591961234	0.000374834602218965	0.00812742042309284	2	35.5	standard ATAC-Seq in frozen liver
peak_9959	chr10	67838052	67838800	4.69127765574424	5.83903277576891	1.64147067176588	3.55719591961234	0.000374834602218965	0.00812742042309284	5	92.5	standard ATAC-Seq in frozen liver
peak_66698	chr3	154509392	154509780	4.69127765574424	5.83903277576891	1.64147067176588	3.55719591961234	0.000374834602218965	0.00812742042309284	1.5	46.5	standard ATAC-Seq in frozen liver
peak_66722	chr3	157104261	157104591	4.69127765574424	5.83903277576891	1.64147067176588	3.55719591961234	0.000374834602218965	0.00812742042309284	2	39	standard ATAC-Seq in frozen liver
peak_94195	chr8	37441065	37441460	4.69127765574424	5.83903277576891	1.64147067176588	3.55719591961234	0.000374834602218965	0.00812742042309284	1	46	standard ATAC-Seq in frozen liver
peak_104487	chrX	10096319	10096663	4.69127765574424	5.83903277576891	1.64147067176588	3.55719591961234	0.000374834602218965	0.00812742042309284	1.5	40	standard ATAC-Seq in frozen liver
peak_106460	chrX	145293580	145294146	4.69127765574424	5.83903277576891	1.64147067176588	3.55719591961234	0.000374834602218965	0.00812742042309284	3	69	standard ATAC-Seq in frozen liver
peak_198	chr1	11200584	11201123	4.70018663498182	5.84086444792288	1.64304029974706	3.55491246856334	0.000378104941245383	0.00814004202570429	3.5	66	standard ATAC-Seq in frozen liver
peak_3031	chr1	92386890	92387140	4.70018663498182	5.84086444792288	1.64304029974706	3.55491246856334	0.000378104941245383	0.00814004202570429	1.5	30.5	standard ATAC-Seq in frozen liver
peak_3740	chr1	125830742	125831110	4.70018663498182	5.84086444792288	1.64304029974706	3.55491246856334	0.000378104941245383	0.00814004202570429	2	44	standard ATAC-Seq in frozen liver
peak_9696	chr10	61529018	61529317	4.70018663498182	5.84086444792288	1.64304029974706	3.55491246856334	0.000378104941245383	0.00814004202570429	1.5	37.5	standard ATAC-Seq in frozen liver
peak_23927	chr12	115010918	115011185	4.70018663498182	5.84086444792288	1.64304029974706	3.55491246856334	0.000378104941245383	0.00814004202570429	1	31.5	standard ATAC-Seq in frozen liver
peak_27604	chr13	77079653	77079949	4.70018663498182	5.84086444792288	1.64304029974706	3.55491246856334	0.000378104941245383	0.00814004202570429	1	34.5	standard ATAC-Seq in frozen liver
peak_58479	chr2	134156327	134156527	4.70018663498182	5.84086444792288	1.64304029974706	3.55491246856334	0.000378104941245383	0.00814004202570429	0.5	24	standard ATAC-Seq in frozen liver
peak_73144	chr4	146882018	146882467	4.70018663498182	5.84086444792288	1.64304029974706	3.55491246856334	0.000378104941245383	0.00814004202570429	2.5	56	standard ATAC-Seq in frozen liver
peak_82113	chr6	51028299	51028533	4.70018663498182	5.84086444792288	1.64304029974706	3.55491246856334	0.000378104941245383	0.00814004202570429	1.5	27	standard ATAC-Seq in frozen liver
peak_97774	chr8	123304775	123305289	4.70018663498182	5.84086444792288	1.64304029974706	3.55491246856334	0.000378104941245383	0.00814004202570429	3	60.5	standard ATAC-Seq in frozen liver
peak_27216	chr13	66690075	66690275	8.69183082265266	3.58585391225911	1.00913750615052	3.55338483646077	0.000380307671523647	0.00816169417721599	4	41	standard ATAC-Seq in frozen liver
peak_84106	chr6	98540309	98541370	9.69118206793498	-4.04864374114515	1.13943927284366	-3.55318957107832	0.000380590092431031	0.00816284073294867	337	14.5	FFPE-ATAC in frozen liver
peak_97289	chr8	116649658	116649929	11.647601593561	-5.36419632458463	1.5098008095604	-3.55291657721823	0.000380985264067409	0.0081675580129861	108	1.5	FFPE-ATAC in frozen liver
peak_36532	chr15	82273699	82274477	9.68467937777438	-4.04795488242498	1.13936885925713	-3.55280456327747	0.000381147520524374	0.00816824342632385	249.5	15	FFPE-ATAC in frozen liver
peak_15692	chr11	64433537	64433737	4.68682316612545	5.83811236677547	1.64384117000865	3.55150635796811	0.00038303273824021	0.00818166767722073	0.5	24	standard ATAC-Seq in frozen liver
peak_22381	chr12	84266039	84266327	4.68682316612545	5.83811236677547	1.64384117000865	3.55150635796811	0.00038303273824021	0.00818166767722073	1	34.5	standard ATAC-Seq in frozen liver
peak_27189	chr13	66370430	66370683	4.68682316612545	5.83811236677547	1.64384117000865	3.55150635796811	0.00038303273824021	0.00818166767722073	0	30.5	standard ATAC-Seq in frozen liver
peak_28946	chr13	113195359	113195813	4.68682316612545	5.83811236677547	1.64384117000865	3.55150635796811	0.00038303273824021	0.00818166767722073	2.5	53.5	standard ATAC-Seq in frozen liver
peak_29729	chr14	21074560	21075114	4.68682316612545	5.83811236677547	1.64384117000865	3.55150635796811	0.00038303273824021	0.00818166767722073	2	66.5	standard ATAC-Seq in frozen liver
peak_52322	chr19	49520355	49520630	4.68682316612545	5.83811236677547	1.64384117000865	3.55150635796811	0.00038303273824021	0.00818166767722073	0.5	33.5	standard ATAC-Seq in frozen liver
peak_66723	chr3	157104870	157105118	4.68682316612545	5.83811236677547	1.64384117000865	3.55150635796811	0.00038303273824021	0.00818166767722073	0.5	28.5	standard ATAC-Seq in frozen liver
peak_70808	chr4	113713816	113714053	4.68682316612545	5.83811236677547	1.64384117000865	3.55150635796811	0.00038303273824021	0.00818166767722073	1	28.5	standard ATAC-Seq in frozen liver
peak_71216	chr4	119479963	119480268	4.68682316612545	5.83811236677547	1.64384117000865	3.55150635796811	0.00038303273824021	0.00818166767722073	1.5	35	standard ATAC-Seq in frozen liver
peak_72546	chr4	138111591	138111825	4.68682316612545	5.83811236677547	1.64384117000865	3.55150635796811	0.00038303273824021	0.00818166767722073	1	27.5	standard ATAC-Seq in frozen liver
peak_103960	chr9	122345464	122345664	4.68682316612545	5.83811236677547	1.64384117000865	3.55150635796811	0.00038303273824021	0.00818166767722073	1	25	standard ATAC-Seq in frozen liver
peak_12021	chr10	107984545	107984829	4.70464112460061	5.84180126067034	1.64709595692207	3.54672794631037	0.000390047150180013	0.00828755259151608	1	34.5	standard ATAC-Seq in frozen liver
peak_36891	chr15	87899311	87899522	4.70464112460061	5.84180126067034	1.64709595692207	3.54672794631037	0.000390047150180013	0.00828755259151608	0.5	25.5	standard ATAC-Seq in frozen liver
peak_70207	chr4	101903637	101903837	4.70464112460061	5.84180126067034	1.64709595692207	3.54672794631037	0.000390047150180013	0.00828755259151608	1	24	standard ATAC-Seq in frozen liver
peak_85511	chr6	126510219	126510423	4.70464112460061	5.84180126067034	1.64709595692207	3.54672794631037	0.000390047150180013	0.00828755259151608	0.5	24.5	standard ATAC-Seq in frozen liver
peak_52452	chr19	55224870	55225203	9.68022488815559	-4.04902626275949	1.14174783911724	-3.54634020230776	0.000390621568185321	0.00829481332012907	106.5	5	FFPE-ATAC in frozen liver
peak_86340	chr6	141956662	141956867	9.70213924771438	-4.04826365265454	1.14170426906822	-3.54580758111595	0.000391411901285471	0.00830547685753491	65.5	3.5	FFPE-ATAC in frozen liver
peak_54062	chr2	28263533	28263733	4.68236867650666	5.83717182650393	1.64846133943315	3.5409819368352	0.00039864086854649	0.00840686800000315	1	23.5	standard ATAC-Seq in frozen liver
peak_104817	chrX	30589411	30589622	4.68236867650666	5.83717182650393	1.64846133943315	3.5409819368352	0.00039864086854649	0.00840686800000315	1	26	standard ATAC-Seq in frozen liver
peak_50286	chr19	12780420	12780919	10.4629310303623	-3.08305708509747	0.87096200387097	-3.53982960381153	0.000400385453465841	0.00843016735738995	163.5	12	FFPE-ATAC in frozen liver
peak_40976	chr16	84993198	84993547	9.19826939702983	3.21633946742668	0.908724182996845	3.53940120402612	0.000401035850012288	0.00844053783988666	12	73.5	standard ATAC-Seq in frozen liver
peak_45786	chr17	86845512	86845910	10.4499256500411	-3.0817388443205	0.871952312143871	-3.53429746260253	0.000408860654087151	0.00855830516396189	130.5	11	FFPE-ATAC in frozen liver
peak_2872	chr1	89977583	89977784	10.4738882101417	-3.08281122130219	0.872982774719122	-3.53135400901131	0.000413438015923631	0.00863359656021424	65.5	5.5	FFPE-ATAC in frozen liver
peak_92161	chr7	138598868	138599139	10.4519738505829	-3.08330363796251	0.87318289554823	-3.53110860700799	0.000413821793967804	0.00863823713158754	88.5	8	FFPE-ATAC in frozen liver
peak_104812	chrX	30479215	30479467	8.65378861662536	3.57850441872517	1.01343783658664	3.53105468291764	0.000413906169078344	0.00863831221995882	4.5	50.5	standard ATAC-Seq in frozen liver
peak_2969	chr1	91325048	91325736	8.17612518050275	4.11681958163515	1.16644231964981	3.52938118952259	0.000416532687618234	0.00866775424814289	10	136	standard ATAC-Seq in frozen liver
peak_6245	chr1	175671759	175672315	8.17612518050275	4.11681958163515	1.16644231964981	3.52938118952259	0.000416532687618234	0.00866775424814289	9	110.5	standard ATAC-Seq in frozen liver
peak_11141	chr10	86834522	86835052	8.17612518050275	4.11681958163515	1.16644231964981	3.52938118952259	0.000416532687618234	0.00866775424814289	9	102.5	standard ATAC-Seq in frozen liver
peak_23530	chr12	109688122	109688753	8.17612518050275	4.11681958163515	1.16644231964981	3.52938118952259	0.000416532687618234	0.00866775424814289	8.5	125.5	standard ATAC-Seq in frozen liver
peak_48032	chr18	55255306	55256177	8.17612518050275	4.11681958163515	1.16644231964981	3.52938118952259	0.000416532687618234	0.00866775424814289	11	172	standard ATAC-Seq in frozen liver
peak_48431	chr18	63623107	63623510	8.17612518050275	4.11681958163515	1.16644231964981	3.52938118952259	0.000416532687618234	0.00866775424814289	5.5	79.5	standard ATAC-Seq in frozen liver
peak_64152	chr3	96757707	96758166	8.17612518050275	4.11681958163515	1.16644231964981	3.52938118952259	0.000416532687618234	0.00866775424814289	6.5	89	standard ATAC-Seq in frozen liver
peak_66105	chr3	138540671	138541122	8.17612518050275	4.11681958163515	1.16644231964981	3.52938118952259	0.000416532687618234	0.00866775424814289	7	89.5	standard ATAC-Seq in frozen liver
peak_68546	chr4	57707259	57708149	8.17612518050275	4.11681958163515	1.16644231964981	3.52938118952259	0.000416532687618234	0.00866775424814289	15.5	176.5	standard ATAC-Seq in frozen liver
peak_80232	chr5	151270991	151271453	8.17612518050275	4.11681958163515	1.16644231964981	3.52938118952259	0.000416532687618234	0.00866775424814289	7	92	standard ATAC-Seq in frozen liver
peak_89494	chr7	80865775	80866159	8.17612518050275	4.11681958163515	1.16644231964981	3.52938118952259	0.000416532687618234	0.00866775424814289	3.5	73.5	standard ATAC-Seq in frozen liver
peak_102757	chr9	101289553	101289783	8.17612518050275	4.11681958163515	1.16644231964981	3.52938118952259	0.000416532687618234	0.00866775424814289	3.5	46	standard ATAC-Seq in frozen liver
peak_105107	chrX	47943883	47945057	9.60658171641064	5.39736367951095	1.52960975345789	3.52858869218732	0.000417781921831266	0.00867311329154251	8.5	288.5	standard ATAC-Seq in frozen liver
peak_23950	chr12	116067623	116067847	8.18057967012154	4.11733826288589	1.16691520742741	3.52839541097678	0.000418087126331036	0.00867311329154251	3.5	44.5	standard ATAC-Seq in frozen liver
peak_46905	chr18	25688951	25689381	8.18057967012154	4.11733826288589	1.16691520742741	3.52839541097678	0.000418087126331036	0.00867311329154251	9.5	86.5	standard ATAC-Seq in frozen liver
peak_57890	chr2	124442575	124442793	8.18057967012154	4.11733826288589	1.16691520742741	3.52839541097678	0.000418087126331036	0.00867311329154251	3.5	43	standard ATAC-Seq in frozen liver
peak_76187	chr5	75375661	75376091	8.18057967012154	4.11733826288589	1.16691520742741	3.52839541097678	0.000418087126331036	0.00867311329154251	6.5	86.5	standard ATAC-Seq in frozen liver
peak_91927	chr7	134569920	134570323	8.18057967012154	4.11733826288589	1.16691520742741	3.52839541097678	0.000418087126331036	0.00867311329154251	4.5	77.5	standard ATAC-Seq in frozen liver
peak_94283	chr8	40721185	40721579	8.18057967012154	4.11733826288589	1.16691520742741	3.52839541097678	0.000418087126331036	0.00867311329154251	8	75.5	standard ATAC-Seq in frozen liver
peak_105704	chrX	92167727	92168076	8.18057967012154	4.11733826288589	1.16691520742741	3.52839541097678	0.000418087126331036	0.00867311329154251	4	68.5	standard ATAC-Seq in frozen liver
peak_70448	chr4	105817158	105817772	9.60212722679185	5.3969306665904	1.52982233444783	3.52781531885424	0.00041900438294768	0.00867651958187122	8	143.5	standard ATAC-Seq in frozen liver
peak_22633	chr12	87428996	87429384	8.17167069088396	4.11630094491845	1.16685250616756	3.52769602255742	0.000419193250159415	0.00867651958187122	5.5	76.5	standard ATAC-Seq in frozen liver
peak_38635	chr16	18774084	18774329	8.17167069088396	4.11630094491845	1.16685250616756	3.52769602255742	0.000419193250159415	0.00867651958187122	5	47	standard ATAC-Seq in frozen liver
peak_43933	chr17	43515735	43516001	8.17167069088396	4.11630094491845	1.16685250616756	3.52769602255742	0.000419193250159415	0.00867651958187122	4.5	51.5	standard ATAC-Seq in frozen liver
peak_82818	chr6	71687197	71687631	8.17167069088396	4.11630094491845	1.16685250616756	3.52769602255742	0.000419193250159415	0.00867651958187122	8	86	standard ATAC-Seq in frozen liver
peak_86971	chr7	6867342	6867542	8.17167069088396	4.11630094491845	1.16685250616756	3.52769602255742	0.000419193250159415	0.00867651958187122	4	39.5	standard ATAC-Seq in frozen liver
peak_11039	chr10	84793988	84794242	4.67791418688787	5.83619825378261	1.65558941278471	3.5251483300839	0.000423245727460498	0.00872535039808913	1	29	standard ATAC-Seq in frozen liver
peak_20232	chr12	19191321	19191545	4.67791418688787	5.83619825378261	1.65558941278471	3.5251483300839	0.000423245727460498	0.00872535039808913	1	26.5	standard ATAC-Seq in frozen liver
peak_27194	chr13	66465646	66465939	4.67791418688787	5.83619825378261	1.65558941278471	3.5251483300839	0.000423245727460498	0.00872535039808913	1.5	35	standard ATAC-Seq in frozen liver
peak_63725	chr3	89623935	89624222	4.67791418688787	5.83619825378261	1.65558941278471	3.5251483300839	0.000423245727460498	0.00872535039808913	1	34	standard ATAC-Seq in frozen liver
peak_7561	chr10	7098337	7098552	8.18503415974033	4.11786187233146	1.16828197416749	3.52471574789623	0.000423937435122972	0.00872674598163917	3.5	41.5	standard ATAC-Seq in frozen liver
peak_30880	chr14	44682884	44683118	8.18503415974033	4.11786187233146	1.16828197416749	3.52471574789623	0.000423937435122972	0.00872674598163917	2.5	47	standard ATAC-Seq in frozen liver
peak_36983	chr15	89939922	89940456	8.18503415974033	4.11786187233146	1.16828197416749	3.52471574789623	0.000423937435122972	0.00872674598163917	5	105.5	standard ATAC-Seq in frozen liver
peak_41546	chr16	95670890	95671378	8.18503415974033	4.11786187233146	1.16828197416749	3.52471574789623	0.000423937435122972	0.00872674598163917	6	98.5	standard ATAC-Seq in frozen liver
peak_63113	chr3	79846694	79847363	8.18503415974033	4.11786187233146	1.16828197416749	3.52471574789623	0.000423937435122972	0.00872674598163917	9	128.5	standard ATAC-Seq in frozen liver
peak_103539	chr9	114959526	114959851	8.18503415974033	4.11786187233146	1.16828197416749	3.52471574789623	0.000423937435122972	0.00872674598163917	4	64	standard ATAC-Seq in frozen liver
peak_106887	chrY	1900315	1901008	5.12168364374425	-5.6563299276346	1.60508426520883	-3.52400808495788	0.000425071278784559	0.00874503606809194	123.5	1	FFPE-ATAC in frozen liver
peak_7429	chr10	4752729	4752988	8.16721620126517	4.11577744868802	1.16815639622444	3.52331028789508	0.000426192087136122	0.00876135248101687	3.5	51.5	standard ATAC-Seq in frozen liver
peak_60969	chr3	6115990	6116283	8.16721620126517	4.11577744868802	1.16815639622444	3.52331028789508	0.000426192087136122	0.00876135248101687	5	58	standard ATAC-Seq in frozen liver
peak_102471	chr9	94545994	94546460	8.16721620126517	4.11577744868802	1.16815639622444	3.52331028789508	0.000426192087136122	0.00876135248101687	7.5	91	standard ATAC-Seq in frozen liver
peak_28199	chr13	98090190	98090551	8.17817338104456	4.1140124322644	1.16893628967219	3.51944966429102	0.000432443085966624	0.00886259700463487	5.5	71	standard ATAC-Seq in frozen liver
peak_4176	chr1	134258483	134258997	8.39569709580612	3.53287873041177	1.00399334434081	3.51882684315137	0.000433459520745178	0.00886746165952472	11.5	102.5	standard ATAC-Seq in frozen liver
peak_7518	chr10	6266088	6267145	8.39569709580612	3.53287873041177	1.00399334434081	3.51882684315137	0.000433459520745178	0.00886746165952472	26.5	210	standard ATAC-Seq in frozen liver
peak_36619	chr15	83123469	83124635	8.39569709580612	3.53287873041177	1.00399334434081	3.51882684315137	0.000433459520745178	0.00886746165952472	28	231	standard ATAC-Seq in frozen liver
peak_54253	chr2	30495596	30495880	8.39569709580612	3.53287873041177	1.00399334434081	3.51882684315137	0.000433459520745178	0.00886746165952472	6	55.5	standard ATAC-Seq in frozen liver
peak_100527	chr9	55818735	55818978	8.39569709580612	3.53287873041177	1.00399334434081	3.51882684315137	0.000433459520745178	0.00886746165952472	5	48.5	standard ATAC-Seq in frozen liver
peak_15359	chr11	59754930	59755245	8.40219978596673	3.53081300393886	1.00353421280134	3.5183783062888	0.000434192907247511	0.00886746165952472	8.5	61.5	standard ATAC-Seq in frozen liver
peak_43932	chr17	43513499	43513946	8.40219978596673	3.53081300393886	1.00353421280134	3.5183783062888	0.000434192907247511	0.00886746165952472	9	88.5	standard ATAC-Seq in frozen liver
peak_75309	chr5	45156192	45156638	8.40219978596673	3.53081300393886	1.00353421280134	3.5183783062888	0.000434192907247511	0.00886746165952472	9.5	87.5	standard ATAC-Seq in frozen liver
peak_91026	chr7	117930888	117931150	8.40219978596673	3.53081300393886	1.00353421280134	3.5183783062888	0.000434192907247511	0.00886746165952472	5	51	standard ATAC-Seq in frozen liver
peak_97766	chr8	123223078	123223278	8.40219978596673	3.53081300393886	1.00353421280134	3.5183783062888	0.000434192907247511	0.00886746165952472	5	39	standard ATAC-Seq in frozen liver
peak_8204	chr10	21265164	21265699	8.18948864935912	4.11839523214333	1.17057538415944	3.51826570750985	0.000434377195280767	0.00886746165952472	9	105.5	standard ATAC-Seq in frozen liver
peak_39319	chr16	30939971	30940389	8.18948864935912	4.11839523214333	1.17057538415944	3.51826570750985	0.000434377195280767	0.00886746165952472	7.5	82.5	standard ATAC-Seq in frozen liver
peak_41206	chr16	90916179	90916638	8.18948864935912	4.11839523214333	1.17057538415944	3.51826570750985	0.000434377195280767	0.00886746165952472	6.5	92.5	standard ATAC-Seq in frozen liver
peak_53273	chr2	10451305	10452113	8.18948864935912	4.11839523214333	1.17057538415944	3.51826570750985	0.000434377195280767	0.00886746165952472	12.5	157.5	standard ATAC-Seq in frozen liver
peak_66409	chr3	146509199	146509590	8.18948864935912	4.11839523214333	1.17057538415944	3.51826570750985	0.000434377195280767	0.00886746165952472	5	77	standard ATAC-Seq in frozen liver
peak_4992	chr1	153855574	153856025	8.40015158542491	3.53339647156447	1.00453498879767	3.51744489835401	0.000435722804187852	0.00887707391065817	9.5	88.5	standard ATAC-Seq in frozen liver
peak_17271	chr11	88890387	88890723	8.40015158542491	3.53339647156447	1.00453498879767	3.51744489835401	0.000435722804187852	0.00887707391065817	7.5	67.5	standard ATAC-Seq in frozen liver
peak_72217	chr4	134838637	134839404	8.40015158542491	3.53339647156447	1.00453498879767	3.51744489835401	0.000435722804187852	0.00887707391065817	24	149.5	standard ATAC-Seq in frozen liver
peak_17898	chr11	99847030	99847634	8.40665427558552	3.53132262025483	1.00407471019723	3.5169918975065	0.00043646710508934	0.00888446529283982	13.5	117	standard ATAC-Seq in frozen liver
peak_20137	chr12	16843021	16843432	8.40665427558552	3.53132262025483	1.00407471019723	3.5169918975065	0.00043646710508934	0.00888446529283982	9.5	83	standard ATAC-Seq in frozen liver
peak_97183	chr8	113966265	113966582	8.40665427558552	3.53132262025483	1.00407471019723	3.5169918975065	0.00043646710508934	0.00888446529283982	7.5	62.5	standard ATAC-Seq in frozen liver
peak_7539	chr10	6711950	6712532	8.39124260618733	3.53236839090201	1.00445910146072	3.51668712620067	0.000436968525841179	0.00888446529283982	13	113	standard ATAC-Seq in frozen liver
peak_24969	chr13	24227119	24227742	8.39124260618733	3.53236839090201	1.00445910146072	3.51668712620067	0.000436968525841179	0.00888446529283982	16.5	123.5	standard ATAC-Seq in frozen liver
peak_80231	chr5	151268750	151269233	8.39124260618733	3.53236839090201	1.00445910146072	3.51668712620067	0.000436968525841179	0.00888446529283982	13	94	standard ATAC-Seq in frozen liver
peak_103526	chr9	114816573	114817008	8.39124260618733	3.53236839090201	1.00445910146072	3.51668712620067	0.000436968525841179	0.00888446529283982	10	83	standard ATAC-Seq in frozen liver
peak_8724	chr10	37203407	37203715	8.39774529634794	3.53029592926548	1.00399896678565	3.51623462379436	0.000437713991122071	0.0088905406451288	7	60.5	standard ATAC-Seq in frozen liver
peak_66662	chr3	153386706	153386982	8.39774529634794	3.53029592926548	1.00399896678565	3.51623462379436	0.000437713991122071	0.0088905406451288	5.5	53.5	standard ATAC-Seq in frozen liver
peak_105794	chrX	96488061	96488488	8.39774529634794	3.53029592926548	1.00399896678565	3.51623462379436	0.000437713991122071	0.0088905406451288	7.5	84	standard ATAC-Seq in frozen liver
peak_73053	chr4	145278047	145278289	8.16276171164638	4.1152442087904	1.17038666795654	3.51614070927133	0.000437868857259847	0.00889199728950072	2.5	46.5	standard ATAC-Seq in frozen liver
peak_56472	chr2	84647982	84648450	9.73896874122359	-3.42820986960519	0.975557128531267	-3.51410467859168	0.000441238896129417	0.00895193441722324	143.5	12.5	FFPE-ATAC in frozen liver
peak_35511	chr15	66441050	66441621	9.465107462471	-4.01267508201902	1.14206703808694	-3.51351973938465	0.000442211555452374	0.00896996614729162	181	9.5	FFPE-ATAC in frozen liver
peak_51597	chr19	40231039	40231845	9.73246605106298	-3.42751133368552	0.975765557326482	-3.51263816185173	0.000443681258117375	0.00899807131837929	248.5	15	FFPE-ATAC in frozen liver
peak_46911	chr18	25840985	25841284	8.41110876520431	3.53182965315058	1.00563265811819	3.51204749034263	0.00044466853256956	0.00901467454112913	7	59	standard ATAC-Seq in frozen liver
peak_74159	chr5	16060439	16060736	8.41110876520431	3.53182965315058	1.00563265811819	3.51204749034263	0.00044466853256956	0.00901467454112913	6	59	standard ATAC-Seq in frozen liver
peak_31563	chr14	58695147	58695438	8.18298595919852	4.12076369796712	1.17421488657767	3.50937783626417	0.000449156341045888	0.00909875543760299	6.5	58.5	standard ATAC-Seq in frozen liver
peak_4445	chr1	137570125	137570427	8.19394313897791	4.11894306075203	1.17385203802334	3.50891162372386	0.000449944387693837	0.00911161980549876	5	60.5	standard ATAC-Seq in frozen liver
peak_93636	chr8	23737753	23738511	9.73041785052117	-3.42580230358897	0.976317649409874	-3.50890133519522	0.000449961793104844	0.00911161980549876	243	16	FFPE-ATAC in frozen liver
peak_82972	chr6	72640659	72640928	8.15830722202759	4.11469640112521	1.17359998072139	3.50604675248543	0.000454815323472052	0.00917861782917112	5	51	standard ATAC-Seq in frozen liver
peak_5933	chr1	171492966	171493228	8.4188050319238	4.1633797915678	1.18764942768358	3.5055629165655	0.000455642796165961	0.00918101609945948	4.5	51.5	standard ATAC-Seq in frozen liver
peak_7514	chr10	6234438	6234711	8.90008746964148	3.16767092797458	0.903719271203675	3.50514925254999	0.000456351372259764	0.00918101609945948	9	55	standard ATAC-Seq in frozen liver
peak_26764	chr13	58216467	58217082	8.90008746964148	3.16767092797458	0.903719271203675	3.50514925254999	0.000456351372259764	0.00918101609945948	18	126.5	standard ATAC-Seq in frozen liver
peak_39361	chr16	31290342	31290769	8.90008746964148	3.16767092797458	0.903719271203675	3.50514925254999	0.000456351372259764	0.00918101609945948	12	84.5	standard ATAC-Seq in frozen liver
peak_46095	chr18	4333667	4333997	8.90008746964148	3.16767092797458	0.903719271203675	3.50514925254999	0.000456351372259764	0.00918101609945948	10.5	67.5	standard ATAC-Seq in frozen liver
peak_47337	chr18	38158124	38158544	8.90008746964148	3.16767092797458	0.903719271203675	3.50514925254999	0.000456351372259764	0.00918101609945948	15.5	85.5	standard ATAC-Seq in frozen liver
peak_66695	chr3	154355106	154355917	8.90008746964148	3.16767092797458	0.903719271203675	3.50514925254999	0.000456351372259764	0.00918101609945948	24.5	165	standard ATAC-Seq in frozen liver
peak_77855	chr5	114339289	114339588	8.90008746964148	3.16767092797458	0.903719271203675	3.50514925254999	0.000456351372259764	0.00918101609945948	9	59.5	standard ATAC-Seq in frozen liver
peak_89501	chr7	81669293	81669979	8.90008746964148	3.16767092797458	0.903719271203675	3.50514925254999	0.000456351372259764	0.00918101609945948	22	139	standard ATAC-Seq in frozen liver
peak_94218	chr8	37708051	37708589	8.90008746964148	3.16767092797458	0.903719271203675	3.50514925254999	0.000456351372259764	0.00918101609945948	18.5	109.5	standard ATAC-Seq in frozen liver
peak_10082	chr10	69646173	69646554	8.89563298002269	3.16718127057621	0.903676258052257	3.50477424006094	0.000456994629624579	0.00918101609945948	12.5	77.5	standard ATAC-Seq in frozen liver
peak_25865	chr13	41447748	41448015	8.89563298002269	3.16718127057621	0.903676258052257	3.50477424006094	0.000456994629624579	0.00918101609945948	7	55	standard ATAC-Seq in frozen liver
peak_27389	chr13	70415798	70416269	8.89563298002269	3.16718127057621	0.903676258052257	3.50477424006094	0.000456994629624579	0.00918101609945948	15	95.5	standard ATAC-Seq in frozen liver
peak_36177	chr15	78618582	78618802	8.89563298002269	3.16718127057621	0.903676258052257	3.50477424006094	0.000456994629624579	0.00918101609945948	7	44	standard ATAC-Seq in frozen liver
peak_46453	chr18	12098290	12098668	8.89563298002269	3.16718127057621	0.903676258052257	3.50477424006094	0.000456994629624579	0.00918101609945948	11.5	77.5	standard ATAC-Seq in frozen liver
peak_89131	chr7	73341396	73341909	8.89563298002269	3.16718127057621	0.903676258052257	3.50477424006094	0.000456994629624579	0.00918101609945948	14	102	standard ATAC-Seq in frozen liver
peak_92676	chr7	148736245	148736821	8.89563298002269	3.16718127057621	0.903676258052257	3.50477424006094	0.000456994629624579	0.00918101609945948	18	115	standard ATAC-Seq in frozen liver
peak_20054	chr12	13152261	13152858	8.4090605646625	3.53447414404202	1.00871392031989	3.50394108065955	0.000458426773664244	0.00919424245102786	14.5	119.5	standard ATAC-Seq in frozen liver
peak_27230	chr13	66816801	66817145	8.4090605646625	3.53447414404202	1.00871392031989	3.50394108065955	0.000458426773664244	0.00919424245102786	8	69.5	standard ATAC-Seq in frozen liver
peak_76179	chr5	75270620	75271223	8.4090605646625	3.53447414404202	1.00871392031989	3.50394108065955	0.000458426773664244	0.00919424245102786	13	122.5	standard ATAC-Seq in frozen liver
peak_50195	chr19	11050877	11051083	8.4155632548231	3.53233902828314	1.00824495285897	3.5034532216272	0.000459267312931491	0.00919902363318612	5.5	40	standard ATAC-Seq in frozen liver
peak_9249	chr10	51992921	51993240	8.90454195926027	3.16816285181422	0.904773519419269	3.50160872728427	0.000462458232308264	0.00923051824424834	9	63.5	standard ATAC-Seq in frozen liver
peak_10685	chr10	79875932	79876327	8.90454195926027	3.16816285181422	0.904773519419269	3.50160872728427	0.000462458232308264	0.00923051824424834	13	82	standard ATAC-Seq in frozen liver
peak_25292	chr13	32260878	32261372	8.90454195926027	3.16816285181422	0.904773519419269	3.50160872728427	0.000462458232308264	0.00923051824424834	13	103	standard ATAC-Seq in frozen liver
peak_37718	chr15	102070987	102071388	8.90454195926027	3.16816285181422	0.904773519419269	3.50160872728427	0.000462458232308264	0.00923051824424834	11	81.5	standard ATAC-Seq in frozen liver
peak_53396	chr2	13312681	13313075	8.90454195926027	3.16816285181422	0.904773519419269	3.50160872728427	0.000462458232308264	0.00923051824424834	13	82	standard ATAC-Seq in frozen liver
peak_64907	chr3	109144564	109144801	8.90454195926027	3.16816285181422	0.904773519419269	3.50160872728427	0.000462458232308264	0.00923051824424834	7	47.5	standard ATAC-Seq in frozen liver
peak_77395	chr5	105956920	105957338	8.38883631711036	3.52921939613425	1.00801659445399	3.50115207978885	0.000463251406934852	0.00924419522414744	11	80	standard ATAC-Seq in frozen liver
peak_18422	chr11	105984110	105984522	8.8911784904039	3.16668923858334	0.904644331483473	3.50047983320745	0.000464421376678665	0.00925428318496682	12.5	83	standard ATAC-Seq in frozen liver
peak_53006	chr2	4507305	4507751	8.8911784904039	3.16668923858334	0.904644331483473	3.50047983320745	0.000464421376678665	0.00925428318496682	12.5	90.5	standard ATAC-Seq in frozen liver
peak_60445	chr2	170116012	170116215	8.89358477948087	3.16956869868962	0.906418939511921	3.49680325567374	0.00047086896547157	0.00933350441122598	7	42	standard ATAC-Seq in frozen liver
peak_68212	chr4	49078760	49079206	8.88913028986208	3.16907479932344	0.906374662686454	3.49642915869961	0.000471529676515594	0.00933798297270879	14.5	92.5	standard ATAC-Seq in frozen liver
peak_92686	chr7	148810174	148810508	8.88913028986208	3.16907479932344	0.906374662686454	3.49642915869961	0.000471529676515594	0.00933798297270879	11.5	68	standard ATAC-Seq in frozen liver
peak_104147	chrUn_random	3400170	3400382	8.88913028986208	3.16907479932344	0.906374662686454	3.49642915869961	0.000471529676515594	0.00933798297270879	6.5	44.5	standard ATAC-Seq in frozen liver
peak_104107	chrUn_random	2423612	2423927	8.90659015980208	3.16577280085395	0.905783684527434	3.49506494202928	0.000473946421222937	0.00936153608037674	10	64	standard ATAC-Seq in frozen liver
peak_21398	chr12	66367956	66368465	9.33272043765806	5.35453283049913	1.5323814032773	3.49425594636387	0.000475385030262604	0.00937470715856369	6.5	119	standard ATAC-Seq in frozen liver
peak_2530	chr1	82968405	82969031	8.90899644887906	3.16866164386976	0.906860954255098	3.49409865867752	0.000475665202053195	0.00937470715856369	23	128.5	standard ATAC-Seq in frozen liver
peak_24021	chr12	116814377	116814797	8.90899644887906	3.16866164386976	0.906860954255098	3.49409865867752	0.000475665202053195	0.00937470715856369	12.5	85	standard ATAC-Seq in frozen liver
peak_42435	chr17	17963744	17964362	8.90899644887906	3.16866164386976	0.906860954255098	3.49409865867752	0.000475665202053195	0.00937470715856369	22.5	123.5	standard ATAC-Seq in frozen liver
peak_48362	chr18	61927435	61928082	8.90899644887906	3.16866164386976	0.906860954255098	3.49409865867752	0.000475665202053195	0.00937470715856369	16	136.5	standard ATAC-Seq in frozen liver
peak_75978	chr5	68334334	68334791	8.90899644887906	3.16866164386976	0.906860954255098	3.49409865867752	0.000475665202053195	0.00937470715856369	11.5	93.5	standard ATAC-Seq in frozen liver
[truncated: 52 more rows]

## Sheet: README
Supplemental Table S3: List of differential accessible chromatin peaks between FFPE-ATAC on frozen mouse liver and standard ATAC-Seq on frozen mouse liver.
