# Supplementary material for: Profiling chromatin accessibility in formalin-fixed paraffin-embedded samples
Source: HighWire-hosted journal article supplement (doi:10.1101/gr.275269.121), 2021-07-14
Supplement: Supplemental_Table_S4.xlsx [file Supplemental_Table_S4.xlsx]

## Sheet: Supplemental_Table_S4
	chr	start	end	baseMean	log2FoldChange	lfcSE	stat	pvalue	padj	readcounts (FFPE-ATAC in frozen liver)	readcounts (FFPE-ATAC in FFPE liver)	Group
peak_43207	chr17	13743494	13746078	78.8042717555699	3.37926515945292	0.344333731482963	9.81392425569006	9.80784675801128e-23	1.07671522494124e-17	577	2947	FFPE-ATAC in FFPE liver
peak_48686	chr18	42717427	42718487	54.6014958431559	3.03906814279137	0.373103884509167	8.14536719924367	3.78132640815042e-16	1.72602321849585e-12	196	817	FFPE-ATAC in FFPE liver
peak_43192	chr17	13498697	13499263	48.8823098173406	3.5085517846054	0.430989957524588	8.14068106077678	3.93060552029916e-16	1.72602321849585e-12	73	403.5	FFPE-ATAC in FFPE liver
peak_83251	chr6	29697621	29699126	48.6268253052457	3.31437379126339	0.414190033287106	8.00206070860704	1.22354030965007e-15	5.1662107205267e-12	209.5	1056	FFPE-ATAC in FFPE liver
peak_107024	chrUn_random	5552408	5552643	45.3891488627066	3.49368353809985	0.444608725860839	7.85788342623164	3.90678630920094e-15	1.47893416486341e-11	27	155.5	FFPE-ATAC in FFPE liver
peak_43009	chr17	9223557	9224216	49.371187177694	3.09188216983752	0.393986755062699	7.84768048698865	4.23802252950782e-15	1.55084783770633e-11	106	463	FFPE-ATAC in FFPE liver
peak_106903	chrUn_random	3919754	3919969	44.6432102616689	3.5756434077275	0.45592533280583	7.84260744127219	4.41285871067976e-15	1.56273561973269e-11	24.5	140.5	FFPE-ATAC in FFPE liver
peak_63223	chr3	35579274	35579996	48.8656918548146	3.07571733799238	0.3937057666119	7.81222323579603	5.61879272555926e-15	1.92761463813944e-11	118	500.5	FFPE-ATAC in FFPE liver
peak_13406	chr11	3096037	3096264	45.6145787318556	3.04400550880906	0.404153276849616	7.53180954646008	5.00419134128243e-14	1.48477062064142e-10	36	146.5	FFPE-ATAC in FFPE liver
peak_33397	chr14	99863885	99864424	44.1297342510166	3.07271956520702	0.412207633923002	7.45430048435489	9.03458798337994e-14	2.61006869316693e-10	83.5	338.5	FFPE-ATAC in FFPE liver
peak_106904	chrUn_random	3921933	3922705	40.8939631729761	3.32911077021027	0.448646987341942	7.42033461527058	1.16824804234367e-13	3.28849841888541e-10	93.5	457	FFPE-ATAC in FFPE liver
peak_10305	chr10	71759786	71760226	38.4260770124506	4.40886405692292	0.601793604793298	7.32620623051861	2.36759362904608e-13	6.18849514738827e-10	24	258	FFPE-ATAC in FFPE liver
peak_106939	chrUn_random	4527725	4528043	40.1500575751326	3.19631005816673	0.439951010140743	7.26514994736393	3.72624688915613e-13	9.51328162182439e-10	39	183	FFPE-ATAC in FFPE liver
peak_78902	chr5	99186115	99186675	39.3962836336811	3.16644362500213	0.440680258421407	7.18535392609798	6.7033309644309e-13	1.63532972579153e-09	71	315	FFPE-ATAC in FFPE liver
peak_106812	chrM	12773	16234	126.81499700534	10.4480149631985	1.45660522636701	7.17285285956124	7.3450785918419e-13	1.75293494106738e-09	0	6964	FFPE-ATAC in FFPE liver
peak_106811	chrM	52	3352	125.566986070876	10.4337464403267	1.45662977675934	7.162936393858	7.89669955739765e-13	1.84448420023547e-09	0	6588.5	FFPE-ATAC in FFPE liver
peak_88384	chr6	140640952	140641535	39.1415874858809	3.05866895649569	0.432427013756792	7.07326059471382	1.51334904517068e-12	3.39055043934454e-09	78	324	FFPE-ATAC in FFPE liver
peak_106938	chrUn_random	4526125	4526339	35.181910367004	4.27529868776599	0.605897832050002	7.05613795200569	1.71193876364067e-12	3.75876698822472e-09	11	113.5	FFPE-ATAC in FFPE liver
peak_107058	chrUn_random	5888548	5888986	34.4265596969631	3.85784760861276	0.54923392274788	7.02405195460525	2.1552460593551e-12	4.46424655928418e-09	30.5	224.5	FFPE-ATAC in FFPE liver
peak_106940	chrUn_random	4528241	4528844	34.9195207723683	3.56832731944114	0.508828608878961	7.01282761459265	2.3354914507678e-12	4.74801086956925e-09	52.5	308.5	FFPE-ATAC in FFPE liver
peak_106956	chrUn_random	4763247	4763696	35.6625653322376	3.33845886702711	0.478426437952859	6.97799829230185	2.99415298168541e-12	5.9763837905892e-09	44	232	FFPE-ATAC in FFPE liver
peak_107025	chrUn_random	5553018	5553255	33.9270670236786	4.2207439745175	0.606964576030826	6.95385553160047	3.55435605658551e-12	6.96787075442881e-09	12.5	121	FFPE-ATAC in FFPE liver
peak_13407	chr11	3098279	3098516	34.1642427760069	3.53467700595256	0.511150413052079	6.9151406625048	4.67399361705831e-12	9.00202970656628e-09	21	118.5	FFPE-ATAC in FFPE liver
peak_106937	chrUn_random	4524918	4525302	33.1780198142145	4.1867945322948	0.608026377499472	6.88587648041378	5.74328090091082e-12	1.08707434583257e-08	21	191.5	FFPE-ATAC in FFPE liver
peak_107046	chrUn_random	5810984	5811350	33.6721114598681	3.51131355413231	0.51092000842363	6.87253091724859	6.3072704494481e-12	1.17359060544214e-08	33	180.5	FFPE-ATAC in FFPE liver
peak_90841	chr7	52966082	52966570	36.0802316065103	-3.11012318461336	0.455074409738049	-6.83431790067832	8.23961252713213e-12	1.48287361121491e-08	495.5	28	FFPE-ATAC in frozen liver
peak_106941	chrUn_random	4531428	4531973	32.4235715771195	3.76580616343941	0.55221984213471	6.81939668969875	9.14236309656096e-12	1.61180812387505e-08	41	260	FFPE-ATAC in FFPE liver
peak_106990	chrUn_random	5245167	5245492	32.4352033916477	4.15169692289735	0.608956810022307	6.81771983590309	9.2496799814292e-12	1.61180812387505e-08	17	158.5	FFPE-ATAC in FFPE liver
peak_22177	chr12	75904751	75905616	32.9177358964526	3.476308367267	0.511960570727111	6.79018769420032	1.11987752062506e-11	1.89140421679599e-08	75.5	415.5	FFPE-ATAC in FFPE liver
peak_106902	chrUn_random	3916534	3916906	31.6853678178889	3.91115201559528	0.578947823910885	6.75562089373585	1.42224858594294e-11	2.33038614945376e-08	24	175.5	FFPE-ATAC in FFPE liver
peak_21807	chr12	68160050	68160964	31.9244211097886	3.57741708169021	0.531589326223819	6.72966311626804	1.70056351291745e-11	2.74543475017045e-08	67	426.5	FFPE-ATAC in FFPE liver
peak_106975	chrUn_random	5171685	5171886	31.4247416941733	3.71730169293615	0.554053170347815	6.70928692746683	1.95577767768822e-11	3.11169897441001e-08	14.5	94	FFPE-ATAC in FFPE liver
peak_106871	chrUn_random	3558812	3559211	32.6674656696578	3.32655026520965	0.496763557447814	6.69644585504666	2.13549520919946e-11	3.29740989054903e-08	38	189	FFPE-ATAC in FFPE liver
peak_95821	chr8	19929736	19930107	32.4126554532064	3.31471338259104	0.497533474037684	6.66229219853451	2.69589350424357e-11	4.05421759985429e-08	34.5	173	FFPE-ATAC in FFPE liver
peak_106935	chrUn_random	4521552	4521810	30.6767836599859	3.86256316794495	0.58066149402892	6.65200501094804	2.89126856355628e-11	4.23208472234363e-08	16	118	FFPE-ATAC in FFPE liver
peak_106934	chrUn_random	4520415	4520771	30.432516082786	4.05502604423237	0.611940555386416	6.62650319306224	3.4373204165946e-11	4.9006814630412e-08	20.5	162	FFPE-ATAC in FFPE liver
peak_107061	chrUn_random	5893651	5894263	30.9258920378244	3.5276637071105	0.533342893855629	6.61425088390773	3.73437945628822e-11	5.24333847290387e-08	50	277.5	FFPE-ATAC in FFPE liver
peak_107057	chrUn_random	5883810	5884025	31.4249698314757	3.40258735182969	0.514551749463688	6.61272137423723	3.7731824209964e-11	5.24333847290387e-08	19	98	FFPE-ATAC in FFPE liver
peak_75645	chr4_random	142921	143432	30.4265134331911	3.66712748575942	0.555597450876052	6.60033173294294	4.10238773448837e-11	5.62955284849835e-08	33.5	227.5	FFPE-ATAC in FFPE liver
peak_107029	chrUn_random	5557521	5557881	31.9196217041216	3.28974518243886	0.498607739163287	6.59786225532597	4.17128534864265e-11	5.65343057851036e-08	32.5	165.5	FFPE-ATAC in FFPE liver
peak_13733	chr11	7056257	7056789	29.4341010794731	3.79807373245989	0.58257490304817	6.51945992281416	7.05609888029176e-11	9.33283844791939e-08	31	232	FFPE-ATAC in FFPE liver
peak_106957	chrUn_random	4764489	4765002	29.434702701437	3.79809312943662	0.583014579064067	6.51457659177894	7.28949800510956e-11	9.5267664345111e-08	34	222.5	FFPE-ATAC in FFPE liver
peak_92532	chr7	104560722	104561161	29.6466242825415	-3.79105042191247	0.582293610794249	-6.5105478604539	7.4877206407295e-11	9.67069952541088e-08	378	15	FFPE-ATAC in frozen liver
peak_100142	chr8	121966688	121966990	32.1411108178522	-3.15400667198867	0.485556548305331	-6.49565263406837	8.26742179959787e-11	1.05535561928099e-07	271.5	16.5	FFPE-ATAC in frozen liver
peak_58242	chr2	102498903	102499113	54.911592253524	6.78486128818417	1.04564156237243	6.48870658200521	8.65763872688377e-11	1.09246464031727e-07	3	181.5	FFPE-ATAC in FFPE liver
peak_58241	chr2	102497963	102498173	54.1625450440599	6.76486659195708	1.04589297355229	6.46802948582851	9.9289127143536e-11	1.22472580527467e-07	3.5	179	FFPE-ATAC in FFPE liver
peak_58244	chr2	102501288	102502121	62.90703072276	9.43659055991375	1.45947990696351	6.46572146344024	1.00816631694396e-10	1.22975007156028e-07	2.5	834	FFPE-ATAC in FFPE liver
peak_99804	chr8	116663487	116663693	30.3853155950848	-3.33130415605058	0.516322472147525	-6.4519836647721	1.10395481095889e-10	1.33179410002063e-07	179	9	FFPE-ATAC in frozen liver
peak_97167	chr8	56206703	56207078	28.4404854818271	3.95061455867274	0.615362943513441	6.41997474874995	1.36296951523672e-10	1.60890490701293e-07	19.5	158	FFPE-ATAC in FFPE liver
peak_99807	chr8	116669678	116669879	28.653983791521	-3.94446155105321	0.615018811226643	-6.41356244565278	1.42157845813849e-10	1.64986558864965e-07	169	6	FFPE-ATAC in frozen liver
peak_36231	chr15	64870602	64871255	30.4212264742114	3.21310542705468	0.501037439877422	6.41290484767119	1.42772639092117e-10	1.64986558864965e-07	64	284.5	FFPE-ATAC in FFPE liver
peak_106972	chrUn_random	5168279	5168573	29.6776943610295	3.311982964154	0.517991937332603	6.39388902693939	1.61718817740489e-10	1.83027355983181e-07	25	125.5	FFPE-ATAC in FFPE liver
peak_106898	chrUn_random	3907172	3907962	30.9197026458988	3.11049539677262	0.486655059995525	6.39158133237374	1.6417891477621e-10	1.83915565745378e-07	80.5	348	FFPE-ATAC in FFPE liver
peak_10788	chr10	79718501	79718982	30.4008857773057	-3.1932287982319	0.501375960335716	-6.368930804129	1.9035045506653e-10	2.08968633076587e-07	411.5	22.5	FFPE-ATAC in frozen liver
peak_107053	chrUn_random	5880587	5881165	28.9332598149016	3.4222950195676	0.537758095743014	6.36400464569308	1.96560190376921e-10	2.1364925009672e-07	44	243	FFPE-ATAC in FFPE liver
peak_106971	chrUn_random	5167197	5167412	28.4306585331907	3.56124156140337	0.559725678784832	6.36247664951668	1.98526227186774e-10	2.13670664184228e-07	16	89.5	FFPE-ATAC in FFPE liver
peak_84875	chr6	71155173	71155631	30.1515906571364	-3.18009354789797	0.501716274949336	-6.3384301181362	2.32118077573725e-10	2.40397685604917e-07	386.5	20.5	FFPE-ATAC in frozen liver
peak_106992	chrUn_random	5250568	5250896	27.6868256090268	3.70321964267662	0.586068564578751	6.31874812350392	2.63690651183611e-10	2.70544143715775e-07	20	134.5	FFPE-ATAC in FFPE liver
peak_106907	chrUn_random	3927749	3928539	27.4422572208449	3.89565321935031	0.617295586068186	6.31083925962172	2.77526324251684e-10	2.8210293891365e-07	43.5	323.5	FFPE-ATAC in FFPE liver
peak_106900	chrUn_random	3910854	3911339	27.9355191072321	3.53307794082105	0.560371053676741	6.30489015740482	2.88398354011459e-10	2.90431110857345e-07	32	197.5	FFPE-ATAC in FFPE liver
peak_106977	chrUn_random	5174826	5175159	28.9239204195779	3.27171385205677	0.519677634796866	6.29566029589792	3.06094058115444e-10	3.02732538684429e-07	28	138.5	FFPE-ATAC in FFPE liver
peak_106993	chrUn_random	5251009	5251324	28.9292487735293	3.27135208995632	0.519922088542663	6.29200444075359	3.13392516006519e-10	3.04545578881189e-07	25.5	132	FFPE-ATAC in FFPE liver
peak_107062	chrUn_random	5896435	5897501	27.4367421245628	3.68912897010531	0.586451430676701	6.29059590808475	3.16249587747019e-10	3.04545578881189e-07	67.5	430	FFPE-ATAC in FFPE liver
peak_106901	chrUn_random	3916051	3916391	27.6857364337501	3.51899616518047	0.560957830732481	6.2731919805549	3.53720313681272e-10	3.37667563097772e-07	22	137.5	FFPE-ATAC in FFPE liver
peak_106960	chrUn_random	4770245	4771496	26.9431794271936	4.10416952367893	0.657005135975381	6.24678453629733	4.18988403094793e-10	3.86417631205706e-07	57	507	FFPE-ATAC in FFPE liver
peak_47594	chr18	12886214	12886494	28.9300660288062	-3.25270166880239	0.521276342674174	-6.23987970011428	4.37907541484602e-10	3.9730518852662e-07	227	12	FFPE-ATAC in frozen liver
peak_106943	chrUn_random	4533515	4533741	28.4240542616319	3.24395015613363	0.520644335499494	6.2306452504116	4.64517912382054e-10	4.17993778190281e-07	19	92.5	FFPE-ATAC in FFPE liver
peak_106869	chrUn_random	3556479	3556836	26.6985383653322	3.85258941359281	0.619505533097337	6.21881356625025	5.00928062154057e-10	4.43486964446246e-07	19	142.5	FFPE-ATAC in FFPE liver
peak_95788	chr8	19756671	19757005	26.6829681831112	3.64647335057814	0.588476763863402	6.19646105759337	5.77468087104063e-10	4.90119464871039e-07	21	132	FFPE-ATAC in FFPE liver
peak_13377	chr11	3000321	3000648	26.4390014168933	3.8389306930539	0.619550705224878	6.19631397507729	5.78007703848438e-10	4.90119464871039e-07	17.5	129	FFPE-ATAC in FFPE liver
peak_107028	chrUn_random	5557046	5557367	29.4216082269706	3.03030864539746	0.48997829673299	6.18457728761158	6.22690999970029e-10	5.2182931807412e-07	32.5	134	FFPE-ATAC in FFPE liver
peak_85033	chr6	72455223	72455662	28.6683218388318	3.11859902828118	0.505074967449323	6.17452700938716	6.63618365615468e-10	5.51914301482058e-07	41	179.5	FFPE-ATAC in FFPE liver
peak_47581	chr18	12841295	12841551	27.6777745206956	-3.33424091661736	0.540493397899549	-6.16888370806156	6.87737836107434e-10	5.65752194606975e-07	201.5	9.5	FFPE-ATAC in frozen liver
peak_106959	chrUn_random	4767706	4768031	28.6792793577165	3.11789028752431	0.505475261953665	6.16823516837134	6.90563886987135e-10	5.65752194606975e-07	30	132.5	FFPE-ATAC in FFPE liver
peak_107005	chrUn_random	5332810	5333069	28.4232658973372	3.10413997226905	0.505574736608653	6.13982413973319	8.26128875741654e-10	6.43591573740702e-07	22.5	105	FFPE-ATAC in FFPE liver
peak_47582	chr18	12841801	12842079	26.9243740639056	-3.4573364491555	0.563108777445505	-6.13973105665199	8.26613092406145e-10	6.43591573740702e-07	215	10.5	FFPE-ATAC in frozen liver
peak_97165	chr8	56200116	56200530	25.6945668707654	4.03164022583245	0.659680223677812	6.11150688034193	9.86947465600911e-10	7.5241722028565e-07	19	160.5	FFPE-ATAC in FFPE liver
peak_106936	chrUn_random	4523902	4524689	25.6945668707654	4.03164022583245	0.659680223677812	6.11150688034193	9.86947465600911e-10	7.5241722028565e-07	36	304	FFPE-ATAC in FFPE liver
peak_106952	chrUn_random	4747026	4747536	25.6893525854653	3.79451303430468	0.621132781799699	6.1090207206747	1.00244314449156e-09	7.58960074796053e-07	27	193	FFPE-ATAC in FFPE liver
peak_58239	chr2	102492220	102492584	44.4342428914231	8.93504338539589	1.46294295573385	6.10758153650212	1.01152140577355e-09	7.60587886624837e-07	1	256.5	FFPE-ATAC in FFPE liver
peak_28072	chr13	81032264	81033002	26.4361397204878	-3.42834743542745	0.563708115444623	-6.08177768156371	1.18857299639248e-09	8.83132308155356e-07	556	26	FFPE-ATAC in frozen liver
peak_58243	chr2	102499579	102500405	41.6821348884358	6.3830149694835	1.04977727881192	6.08035161201761	1.19919285821531e-09	8.83132308155356e-07	12	539	FFPE-ATAC in FFPE liver
peak_106976	chrUn_random	5172650	5173100	25.4398707229652	3.77941272257495	0.621662163032686	6.07952831508621	1.20536596454351e-09	8.83132308155356e-07	25	170.5	FFPE-ATAC in FFPE liver
peak_107027	chrUn_random	5556011	5556348	25.4448982659346	3.77898643417529	0.621609823351139	6.0793544313739	1.2066737069557e-09	8.83132308155356e-07	18.5	127.5	FFPE-ATAC in FFPE liver
peak_62586	chr3	14860383	14860635	26.4317137994823	-3.42811802981097	0.564276429183924	-6.07524584142002	1.23797912481159e-09	9.00043617887026e-07	190	8.5	FFPE-ATAC in frozen liver
peak_107017	chrUn_random	5488212	5488547	25.6947950080679	3.58615514570875	0.590872874358984	6.06924992046595	1.2850903100813e-09	9.22081694974088e-07	21	127	FFPE-ATAC in FFPE liver
peak_106987	chrUn_random	5241300	5241638	25.1956031457653	4.00159366812467	0.660650714050237	6.05704888078027	1.38641469826521e-09	9.88324623313334e-07	15	128.5	FFPE-ATAC in FFPE liver
peak_106905	chrUn_random	3922782	3923243	25.4512017265115	4.29448837899247	0.71077777419123	6.04195648053152	1.52256538722119e-09	1.07440078462063e-06	16.5	177	FFPE-ATAC in FFPE liver
peak_68333	chr4	3016690	3018306	25.4390823586705	3.57126929444813	0.5912822207213	6.03987261800562	1.54235940511934e-09	1.07848253409813e-06	95	599.5	FFPE-ATAC in FFPE liver
peak_106973	chrUn_random	5168959	5169277	24.9458204722833	3.98632115167028	0.661257339816969	6.02839607462605	1.65594826078155e-09	1.14349092304568e-06	13.5	119.5	FFPE-ATAC in FFPE liver
peak_106974	chrUn_random	5169468	5169986	24.9464220942472	3.98634358043706	0.66126334266042	6.02837526786083	1.65616141922795e-09	1.14349092304568e-06	26	194	FFPE-ATAC in FFPE liver
peak_13380	chr11	3003778	3004135	24.9459345409345	3.74829774357057	0.62279989268728	6.01846241077094	1.76081590250117e-09	1.20815081620301e-06	17.5	131	FFPE-ATAC in FFPE liver
peak_108155	chrX	72979947	72980408	26.6770796021676	3.14243491376969	0.524894458147642	5.98679384968051	2.14017758185847e-09	1.42394445523639e-06	39.5	175.5	FFPE-ATAC in FFPE liver
peak_80774	chr5	125959115	125959394	26.9507876963601	-3.13936395969107	0.52537522972792	-5.97547006796814	2.29427663589615e-09	1.51727700822479e-06	209.5	11.5	FFPE-ATAC in frozen liver
peak_99223	chr8	107580291	107580588	26.1870313426493	-3.24642676877376	0.543688369315502	-5.97111682352334	2.35634931797889e-09	1.53709099384436e-06	221.5	12	FFPE-ATAC in frozen liver
peak_107019	chrUn_random	5490453	5490817	24.4462551253192	3.9552823499066	0.662609090674912	5.96925458097455	2.3833997307128e-09	1.53709099384436e-06	16.5	132	FFPE-ATAC in FFPE liver
peak_106899	chrUn_random	3909443	3909856	25.9279183240523	3.24975304860561	0.544648498573279	5.9666978925278	2.4210306704326e-09	1.53709099384436e-06	33	154	FFPE-ATAC in FFPE liver
peak_97168	chr8	56207316	56207551	24.9392162007245	3.5402185116154	0.593416513487265	5.96582405637988	2.43402454660347e-09	1.53709099384436e-06	15	85.5	FFPE-ATAC in FFPE liver
peak_91166	chr7	67027888	67028113	24.696525352114	4.24958181823083	0.712338816424216	5.96567492919	2.43624883111757e-09	1.53709099384436e-06	8.5	84	FFPE-ATAC in FFPE liver
peak_25519	chr13	25142147	25142663	24.4466700049524	3.71693050214513	0.62403458048572	5.95628931212762	2.5802938278681e-09	1.61866992409822e-06	29	187	FFPE-ATAC in FFPE liver
peak_106958	chrUn_random	4765576	4765856	24.2027032387345	3.93910354385106	0.663402172066112	5.93773085123167	2.88993959527123e-09	1.80261624266176e-06	12.5	101.5	FFPE-ATAC in FFPE liver
peak_58238	chr2	102491654	102492030	37.689221844507	6.23588992109492	1.05177989436727	5.92889249403871	3.04984671264758e-09	1.87755706036706e-06	6	222.5	FFPE-ATAC in FFPE liver
peak_99808	chr8	116671743	116672271	25.2050475595315	-3.35287541146139	0.566929424456984	-5.9140966526351	3.33701900072529e-09	2.01286419186057e-06	379.5	19	FFPE-ATAC in frozen liver
peak_99811	chr8	116677642	116677958	24.2068919722289	-3.68391866985315	0.624500885833972	-5.89898069549343	3.65754021941584e-09	2.1704239071767e-06	222.5	9.5	FFPE-ATAC in frozen liver
peak_107026	chrUn_random	5554197	5554950	23.9474054689704	3.68486610394892	0.625319730012693	5.8927712130147	3.79772054663017e-09	2.24149225446025e-06	38.5	265.5	FFPE-ATAC in FFPE liver
peak_80801	chr5	127400549	127401044	26.6765920488548	3.0015954042998	0.509658352702588	5.88942649204728	3.8753813463822e-09	2.26299595525098e-06	46	186	FFPE-ATAC in FFPE liver
peak_13742	chr11	7102325	7104321	23.698411159783	3.90749412945337	0.664332965696946	5.88183084570259	4.05752909651023e-09	2.34441895654731e-06	94.5	701	FFPE-ATAC in FFPE liver
peak_23722	chr12	105324688	105326174	24.4667297316497	-3.49165074257359	0.59393244969691	-5.87886845440994	4.13080468884881e-09	2.36228446252008e-06	1039.5	46.5	FFPE-ATAC in frozen liver
peak_106955	chrUn_random	4755325	4755676	23.9459014140605	3.68480133998176	0.626790422535255	5.87884116843617	4.13148556493251e-09	2.36228446252008e-06	17.5	124.5	FFPE-ATAC in FFPE liver
peak_9533	chr10	57687985	57688492	24.6845200529243	3.3388066529196	0.568964747463738	5.86821357175981	4.40515592548347e-09	2.48001242387437e-06	34.5	182	FFPE-ATAC in FFPE liver
peak_100382	chr8	124235603	124236010	25.1851019014854	3.20259425031487	0.546701487537457	5.85803097910072	4.68387292372742e-09	2.61015357076e-06	31	146	FFPE-ATAC in FFPE liver
peak_106926	chrUn_random	4258499	4259148	23.448628486301	3.89118646096349	0.664877388572422	5.85248728238206	4.84275287868628e-09	2.65821126887529e-06	25.5	227.5	FFPE-ATAC in FFPE liver
peak_106874	chrUn_random	3567550	3568026	24.4528593968781	4.57130909284357	0.782272603541928	5.84362672570388	5.10764093755775e-09	2.78966134211954e-06	17	176	FFPE-ATAC in FFPE liver
peak_58237	chr2	102490811	102491298	34.4495537937454	8.56784973909612	1.46674005423719	5.84142344401442	5.17566621946486e-09	2.80056505109022e-06	2	267.5	FFPE-ATAC in FFPE liver
peak_106942	chrUn_random	4532760	4532961	24.4572853178835	4.57082332636069	0.782497258505432	5.84132823045407	5.17862567631298e-09	2.80056505109022e-06	6	75.5	FFPE-ATAC in FFPE liver
peak_63793	chr3	56379257	56379796	23.4484417439702	3.65208425292223	0.626814803633523	5.82641672109818	5.66301057516213e-09	3.04750472525428e-06	28	187	FFPE-ATAC in FFPE liver
peak_101944	chr9	32094311	32094942	24.1858571389061	3.30640904613756	0.569744130019183	5.80332270562617	6.50134923848426e-09	3.43136836899058e-06	47.5	220	FFPE-ATAC in FFPE liver
peak_107048	chrUn_random	5813585	5813934	25.4340962106728	3.06487659043452	0.528330276690171	5.80106180860019	6.58963029914013e-09	3.46132154961676e-06	28	125.5	FFPE-ATAC in FFPE liver
peak_37264	chr15	82286548	82288826	23.2140647388776	-4.13728761469103	0.715490455715979	-5.78244976105366	7.36205592036441e-09	3.8486374333025e-06	1576.5	47	FFPE-ATAC in frozen liver
peak_91163	chr7	67005073	67005289	24.6790049566421	3.17088518546663	0.549002950079811	5.77571611410407	7.66264759543961e-09	3.96798639469319e-06	16.5	77	FFPE-ATAC in FFPE liver
peak_13379	chr11	3002643	3002987	22.9483474487218	4.13791968018696	0.717135028615238	5.77007050984127	7.92383705805676e-09	4.08397538061282e-06	13.5	118	FFPE-ATAC in FFPE liver
peak_107021	chrUn_random	5547285	5548166	22.9485755860242	3.61850464653499	0.628049839657969	5.76149282755266	8.33732070048022e-09	4.27700655990383e-06	48	297.5	FFPE-ATAC in FFPE liver
peak_84502	chr6	55122587	55122897	22.9757998112726	-3.60246933036833	0.627914864609738	-5.73719389906041	9.62580344557651e-09	4.84738682595796e-06	206	8.5	FFPE-ATAC in frozen liver
peak_70630	chr4	61745864	61746179	25.2107493981444	-3.0320077979303	0.528852841978928	-5.73317860330437	9.85657453129416e-09	4.91847549372729e-06	223	13.5	FFPE-ATAC in frozen liver
peak_107063	chrUn_random	5898424	5898804	22.4507010363008	3.82409715542143	0.66817253014974	5.72321815529357	1.04524905208921e-08	5.16885072916241e-06	16.5	126.5	FFPE-ATAC in FFPE liver
peak_107023	chrUn_random	5549231	5549574	22.4505869676496	4.10442892500023	0.717729804785771	5.71862683928157	1.07388339635416e-08	5.2866364634599e-06	12.5	115.5	FFPE-ATAC in FFPE liver
peak_58236	chr2	102489357	102490588	30.2050532104428	8.37816701770008	1.46924069555453	5.70237881583994	1.18146902367068e-08	5.7645711505596e-06	2	587.5	FFPE-ATAC in FFPE liver
peak_91334	chr7	72952655	72952902	24.9614542779751	-3.01597135861441	0.52943117905827	-5.69662588436725	1.22201671458771e-08	5.89173930453155e-06	171	11	FFPE-ATAC in frozen liver
peak_106986	chrUn_random	5240137	5240525	22.1997151188909	3.80676304131155	0.668341225813034	5.69583753670236	1.22767740727854e-08	5.89173930453155e-06	16	127.5	FFPE-ATAC in FFPE liver
peak_106868	chrUn_random	3554134	3554348	22.2008042941675	4.08735082881637	0.718291855276651	5.69037613163819	1.26759837970606e-08	6.05035729228308e-06	8.5	71	FFPE-ATAC in FFPE liver
peak_13381	chr11	3004554	3004773	22.1999018612216	4.08731428283274	0.718500977325393	5.68866906492973	1.28033314940975e-08	6.08468629763429e-06	9.5	73.5	FFPE-ATAC in FFPE liver
peak_106985	chrUn_random	5187523	5187894	21.9563499746369	4.06959201195292	0.718967309840527	5.66032969267488	1.51082457635367e-08	7.08802704344796e-06	15	123	FFPE-ATAC in FFPE liver
peak_106979	chrUn_random	5176968	5177337	22.1948016445727	3.56713388058967	0.630291525802386	5.65949839806044	1.51816066462493e-08	7.09213599673148e-06	20	120.5	FFPE-ATAC in FFPE liver
peak_99810	chr8	116677154	116677502	21.9880001208907	-4.05416598112457	0.71897333387081	-5.63882662976907	1.71212806243267e-08	7.86439877915988e-06	226.5	8	FFPE-ATAC in frozen liver
peak_59211	chr2	124958990	124959401	23.6914334035627	3.10372685180852	0.550962443954279	5.63328206099303	1.76811919641455e-08	8.08774556256609e-06	33	139	FFPE-ATAC in FFPE liver
peak_106906	chrUn_random	3926437	3926903	21.7012389472035	4.05257640659789	0.719561396547258	5.63200920177731	1.7812217714979e-08	8.11387167206684e-06	19	151.5	FFPE-ATAC in FFPE liver
peak_106996	chrUn_random	5256125	5256532	22.444096764742	3.37425337656486	0.599336944224964	5.62997727585155	1.80233366007367e-08	8.15273170396521e-06	22.5	132	FFPE-ATAC in FFPE liver
peak_106911	chrUn_random	4058769	4059021	24.2038650876907	4.98659576606512	0.886876272764936	5.6226510046535	1.88049062915613e-08	8.46074351472905e-06	6.5	94	FFPE-ATAC in FFPE liver
peak_91167	chr7	67030570	67030784	22.937244582478	3.22200578690832	0.573969825173182	5.61354560047848	1.98222333096734e-08	8.81014006060429e-06	15	70.5	FFPE-ATAC in FFPE liver
peak_98926	chr8	96698349	96698587	21.7083721670467	4.05215879400336	0.723285822447896	5.60243083472754	2.11366388247751e-08	9.27577997906849e-06	8.5	77	FFPE-ATAC in FFPE liver
peak_107004	chrUn_random	5332254	5332562	21.4517570847034	4.03488285201963	0.720277121437942	5.60184786095176	2.120786634068e-08	9.27577997906849e-06	12	99.5	FFPE-ATAC in FFPE liver
peak_106912	chrUn_random	4062747	4064283	21.9556342840217	4.40900061529961	0.787957517631714	5.59548010729221	2.20012074757737e-08	9.58458157895998e-06	47.5	515	FFPE-ATAC in FFPE liver
peak_95966	chr8	24205806	24206376	21.6999630295961	3.53101128996439	0.632132541625841	5.58587172380441	2.32530831772969e-08	1.00899080011337e-05	31	181.5	FFPE-ATAC in FFPE liver
peak_106924	chrUn_random	4252368	4253505	22.6930910739293	3.20409100599705	0.574271145951611	5.57940448268147	2.41343430570954e-08	1.0420554512816e-05	82.5	371	FFPE-ATAC in FFPE liver
peak_61895	chr2	172966425	172966730	22.6877627199779	3.20452527069237	0.574575189671798	5.57720787165005	2.44409744552037e-08	1.04810727213544e-05	21	99.5	FFPE-ATAC in FFPE liver
peak_85574	chr6	87407132	87408137	21.7058516105397	4.39171588091528	0.788730403007136	5.5680824070827	2.57558018114795e-08	1.08333244393334e-05	26	330	FFPE-ATAC in FFPE liver
peak_43544	chr17	24479630	24480121	21.4454536241266	3.51334888220073	0.632841127148031	5.55170757949002	2.82892529343481e-08	1.17703259345683e-05	28	153.5	FFPE-ATAC in FFPE liver
peak_13927	chr11	16740331	16740556	23.4595668387133	-3.0703649007918	0.55305851565235	-5.55160948416137	2.83051351939411e-08	1.17703259345683e-05	148.5	9	FFPE-ATAC in frozen liver
peak_106925	chrUn_random	4257576	4257996	21.4451528131446	3.51333691959331	0.633199266223302	5.54854862758844	2.8805077227052e-08	1.19330195587283e-05	22	132	FFPE-ATAC in FFPE liver
peak_70629	chr4	61745065	61745314	22.7215498218134	-3.18820526425771	0.574799181550643	-5.54664196921237	2.91208188927437e-08	1.20184684919711e-05	160	9	FFPE-ATAC in frozen liver
peak_106875	chrUn_random	3569978	3570297	20.9521917377394	3.99880456833738	0.721708849909792	5.54074481536039	3.01187848747214e-08	1.22165836588733e-05	13.5	100	FFPE-ATAC in FFPE liver
peak_91164	chr7	67007269	67007834	21.94332817385	3.33856350543911	0.603236881431137	5.53441543149451	3.12268050597987e-08	1.25113499498896e-05	36	178.5	FFPE-ATAC in FFPE liver
peak_47590	chr18	12869084	12869464	21.9989162448038	-3.32375762439666	0.601291129512806	-5.52770107732958	3.24454258665896e-08	1.29054032502176e-05	237.5	13	FFPE-ATAC in frozen liver
peak_88235	chr6	138096938	138097315	23.2413394093063	-3.05435674698054	0.553214570153554	-5.52110683949042	3.36870860644251e-08	1.33509097301034e-05	242	14.5	FFPE-ATAC in frozen liver
peak_107022	chrUn_random	5548250	5549153	21.1956709506446	3.49496583657593	0.633823822217971	5.51409668438435	3.50575848069262e-08	1.36962872515629e-05	47.5	281	FFPE-ATAC in FFPE liver
peak_106978	chrUn_random	5176050	5176252	21.2059854525937	4.3564990342204	0.791019830071343	5.50744604446576	3.64076945666534e-08	1.40867855226667e-05	6	65	FFPE-ATAC in FFPE liver
peak_83661	chr6	37567019	37568009	20.7033114972033	3.98046258374363	0.72276381391457	5.50727984316896	3.64420718379076e-08	1.40867855226667e-05	37	308	FFPE-ATAC in FFPE liver
peak_106954	chrUn_random	4754425	4754909	20.7022223219266	3.69852159804083	0.672729924572708	5.49778070358619	3.84600796615975e-08	1.47628881305239e-05	20	148.5	FFPE-ATAC in FFPE liver
peak_106997	chrUn_random	5262691	5263467	20.9568044010756	4.33859658210991	0.790884102345755	5.48575520640973	4.1170669933874e-08	1.56258956067636e-05	27.5	246	FFPE-ATAC in FFPE liver
peak_106867	chrUn_random	3553588	3553788	21.4461693147418	3.3021292164321	0.602999575701123	5.47617170806901	4.34625966472204e-08	1.61741265170458e-05	12.5	62	FFPE-ATAC in FFPE liver
peak_107051	chrUn_random	5872437	5873836	22.6932051425805	3.03418542035017	0.554215698501385	5.47473741461077	4.38160841055441e-08	1.6250586247266e-05	110	449	FFPE-ATAC in FFPE liver
peak_106953	chrUn_random	4750766	4751108	20.7085257825034	4.3205083918261	0.791076293524492	5.46155715598162	4.71976239163718e-08	1.71694860969035e-05	9.5	107	FFPE-ATAC in FFPE liver
peak_92531	chr7	104559790	104560234	20.9965214788265	-3.4613996524062	0.633881361863157	-5.46064273325873	4.74413894582031e-08	1.7188657346901e-05	266.5	13.5	FFPE-ATAC in frozen liver
peak_106994	chrUn_random	5254600	5255105	20.2078712602627	3.94241771349502	0.724196840567567	5.4438482642444	5.21416404138529e-08	1.87064098897817e-05	17	153	FFPE-ATAC in FFPE liver
peak_888	chr1	37624174	37624561	21.1960858302778	3.28349382505602	0.603499677572299	5.44075489528768	5.30552683589861e-08	1.89221059174725e-05	25.5	118.5	FFPE-ATAC in FFPE liver
peak_107049	chrUn_random	5816676	5816962	20.2025429063114	3.94292610803134	0.724716478515395	5.44064641128148	5.30875891327418e-08	1.89221059174725e-05	13	86.5	FFPE-ATAC in FFPE liver
peak_106949	chrUn_random	4737855	4738117	22.4383949261291	3.01669772947984	0.554648655226198	5.4389345418129	5.36001419638931e-08	1.90429682360458e-05	20.5	82.5	FFPE-ATAC in FFPE liver
peak_97169	chr8	56207943	56208161	22.4428208471346	3.01622612638382	0.555431058385945	5.43042395783343	5.62203313784241e-08	1.99094329001767e-05	16.5	70	FFPE-ATAC in FFPE liver
peak_107001	chrUn_random	5324510	5324810	20.2023561639806	3.66052569275155	0.674924057839846	5.42361122000509	5.84068450474665e-08	2.05511597953715e-05	12.5	89.5	FFPE-ATAC in FFPE liver
peak_91335	chr7	72953653	72954113	22.4878248838651	-3.00142182803914	0.55472579442046	-5.41064046097733	6.27997434130868e-08	2.18864083543876e-05	290	18	FFPE-ATAC in frozen liver
peak_87593	chr6	125542565	125542790	20.2089604355394	4.28350097877	0.792301925715966	5.40639980762283	6.43041713284937e-08	2.23397982044727e-05	7.5	68.5	FFPE-ATAC in FFPE liver
peak_84499	chr6	55120188	55120604	21.7498078669653	-3.11756532520833	0.577469832359471	-5.39866353272574	6.71391532632617e-08	2.31779980641325e-05	253	15	FFPE-ATAC in frozen liver
peak_106989	chrUn_random	5242795	5243138	21.2076762498343	4.78955843915779	0.892736853506918	5.36502825031036	8.09365505657994e-08	2.74752692103069e-05	9.5	112.5	FFPE-ATAC in FFPE liver
peak_9537	chr10	57695876	57696395	19.7026767483653	3.9044325956476	0.727802160679263	5.36468948100341	8.10885966072403e-08	2.74752692103069e-05	21	152.5	FFPE-ATAC in FFPE liver
peak_34364	chr15	6394596	6394796	21.5008135577779	-3.09905174292129	0.578188874062669	-5.35992974258683	8.32543232352682e-08	2.81222857202799e-05	121	7.5	FFPE-ATAC in frozen liver
peak_107009	chrUn_random	5341133	5342139	19.7033924389805	3.62154468938488	0.676273461091186	5.35514832053503	8.54862636763553e-08	2.86995948399204e-05	45.5	294	FFPE-ATAC in FFPE liver
peak_80783	chr5	126003146	126004123	20.7574681869267	-3.23152153655187	0.604971035783991	-5.34161364000525	9.21228363338173e-08	3.064647604716e-05	568.5	31	FFPE-ATAC in frozen liver
peak_62305	chr2	181663755	181664151	19.9476600161804	3.39940261264814	0.638028767421493	5.32797702270756	9.93126838948031e-08	3.2740677929896e-05	23.5	114	FFPE-ATAC in FFPE liver
peak_106866	chrUn_random	3552954	3553302	19.9580159131012	3.39839898663946	0.638682765447892	5.32094988386957	1.03226839306742e-07	3.37272191843257e-05	18	101	FFPE-ATAC in FFPE liver
peak_63685	chr3	52409305	52409888	19.4605148480392	4.22618875783944	0.794799630140182	5.31730086121712	1.05317847520384e-07	3.43083045063361e-05	16.5	170.5	FFPE-ATAC in FFPE liver
peak_108158	chrX	72994880	72995276	19.2105454322264	3.86446109170583	0.727492106315602	5.31203164702015	1.08409770654616e-07	3.51228136648198e-05	14.5	113.5	FFPE-ATAC in FFPE liver
peak_106873	chrUn_random	3565270	3565572	20.7072084699244	4.7538917337979	0.894942774218801	5.31195051878885	1.08458055878284e-07	3.51228136648198e-05	7.5	96.5	FFPE-ATAC in FFPE liver
peak_107008	chrUn_random	5338944	5339460	19.2095289306293	4.2064962567701	0.795748985121455	5.28621001775838	1.24876518991446e-07	4.00849974602336e-05	19	151	FFPE-ATAC in FFPE liver
peak_107056	chrUn_random	5883293	5883630	20.4568241744784	4.73572118422228	0.89735853518825	5.27740139366793	1.3102866926229e-07	4.15548789052954e-05	8	107	FFPE-ATAC in FFPE liver
peak_99793	chr8	116616428	116616709	19.7651285068882	-3.36593918388239	0.638284512555114	-5.27341509573562	1.33908218764523e-07	4.20016518976804e-05	160	7.5	FFPE-ATAC in frozen liver
peak_24433	chr12	116852373	116853030	20.2138739098576	4.71686576290594	0.8950451445771	5.269975253745	1.36442152530382e-07	4.26745183673445e-05	15.5	205	FFPE-ATAC in FFPE liver
peak_106995	chrUn_random	5255632	5255984	18.9656762330626	4.18607636207494	0.796358721372569	5.25652102467089	1.46806000441716e-07	4.53986184070199e-05	11	101	FFPE-ATAC in FFPE liver
peak_107055	chrUn_random	5882763	5883038	18.705651731311	3.82433322829125	0.728953184772847	5.24633585280648	1.5515395612893e-07	4.73137679383058e-05	9.5	76.5	FFPE-ATAC in FFPE liver
peak_91161	chr7	67003295	67003503	19.9468716518857	3.1865821797503	0.609025514748129	5.23226384212844	1.67446510610013e-07	5.03628640582953e-05	14	59.5	FFPE-ATAC in FFPE liver
peak_93000	chr7	111576369	111576748	19.7098826418881	4.67994783863048	0.89638820186355	5.22089406007473	1.7806138568242e-07	5.32636430016396e-05	8.5	114.5	FFPE-ATAC in FFPE liver
peak_106981	chrUn_random	5183266	5183484	18.7020141746003	4.16767792620437	0.800204654676238	5.20826503801157	1.90614525550423e-07	5.6863731601769e-05	7	61.5	FFPE-ATAC in FFPE liver
peak_88238	chr6	138102435	138102751	20.5080589981062	-3.02293735471889	0.582647168905308	-5.18828120352574	2.12243938756439e-07	6.16411424355042e-05	180	11.5	FFPE-ATAC in frozen liver
peak_106927	chrUn_random	4259906	4260260	18.206086384347	3.78250348429106	0.730909706164556	5.17506259992047	2.27834578968229e-07	6.53052425945461e-05	16.5	95.5	FFPE-ATAC in FFPE liver
peak_106999	chrUn_random	5321601	5322445	18.206086384347	3.78250348429106	0.730909706164556	5.17506259992047	2.27834578968229e-07	6.53052425945461e-05	36.5	225.5	FFPE-ATAC in FFPE liver
peak_29638	chr13	120282928	120283264	18.9547601091496	3.31761763827788	0.641613977097214	5.17073779048179	2.33171554668107e-07	6.62823902611052e-05	20	92.5	FFPE-ATAC in FFPE liver
peak_106870	chrUn_random	3557451	3557726	19.2153448378934	4.6409058363189	0.897646806242553	5.17008004043951	2.33993752039034e-07	6.62823902611052e-05	7	80	FFPE-ATAC in FFPE liver
peak_106929	chrUn_random	4262207	4262728	18.4556823154982	3.51920338287147	0.680727411473749	5.1697688730538	2.34383691247017e-07	6.62823902611052e-05	23.5	140	FFPE-ATAC in FFPE liver
peak_107000	chrUn_random	5322735	5323592	18.2105123053524	3.78191171110236	0.731644222263118	5.16905839754214	2.35276377840847e-07	6.62823902611052e-05	32.5	231	FFPE-ATAC in FFPE liver
peak_106988	chrUn_random	5241758	5242104	19.2100164839421	4.64145212913921	0.898012655815923	5.16858208966113	2.35876679651842e-07	6.62823902611052e-05	9.5	102	FFPE-ATAC in FFPE liver
peak_106918	chrUn_random	4076908	4077265	18.2106990476832	4.12517861410673	0.799634713563321	5.15882883038452	2.48499362211078e-07	6.9416052119324e-05	11.5	98.5	FFPE-ATAC in FFPE liver
peak_42119	chr16	91358546	91358866	20.1908384181036	3.01688683794388	0.584998090513419	5.1570883509998	2.50819472236253e-07	6.98863260953503e-05	22	92	FFPE-ATAC in FFPE liver
peak_47592	chr18	12874799	12875626	20.2643930428703	-3.00336835153778	0.582717377396183	-5.15407377236294	2.54887591984071e-07	7.07105262342758e-05	466.5	28.5	FFPE-ATAC in frozen liver
peak_99812	chr8	116679058	116679348	18.518165352729	-3.50655233471741	0.680363061329914	-5.15394284907695	2.55065707078394e-07	7.07105262342758e-05	155	7.5	FFPE-ATAC in frozen liver
peak_71901	chr4	101417969	101418582	19.4491111708134	3.14601135174725	0.610491869057114	5.15324038075423	2.56023437912641e-07	7.073067312749e-05	36	168.5	FFPE-ATAC in FFPE liver
peak_12318	chr10	110945738	110946024	19.5160201290497	-3.13299187284341	0.609488444864252	-5.14036303599031	2.74208144629968e-07	7.46968841826862e-05	158	9	FFPE-ATAC in frozen liver
peak_106876	chrUn_random	3571229	3571788	17.956303710865	3.76112518384697	0.732015374289838	5.13804124332199	2.77616961206602e-07	7.52688724134622e-05	21	149.5	FFPE-ATAC in FFPE liver
peak_15091	chr11	50463288	50464370	17.9621196181291	4.10416965136363	0.799371544989592	5.13424536698647	2.83278330114654e-07	7.65974836411745e-05	32.5	293.5	FFPE-ATAC in FFPE liver
peak_63613	chr3	51569888	51570873	18.2062004529982	3.49783713571529	0.681771756667513	5.13051046997407	2.88957486112828e-07	7.79411346018486e-05	50	259.5	FFPE-ATAC in FFPE liver
peak_109493	chrX	166579742	166581018	18.7113535699239	4.60195565674529	0.899121843647751	5.11827811687356	3.08337698771575e-07	8.23591749606868e-05	29.5	366	FFPE-ATAC in FFPE liver
peak_53163	chr19	44479989	44481144	18.7827298441373	-3.28492481615421	0.642434456446568	-5.1132450683355	3.16671030205189e-07	8.4379763026592e-05	618.5	34.5	FFPE-ATAC in frozen liver
peak_107018	chrUn_random	5489205	5489677	17.712938566611	4.08281880473569	0.80050567108499	5.10029966333895	3.39116150163429e-07	8.92770025925454e-05	15.5	125	FFPE-ATAC in FFPE liver
peak_69970	chr4	53325312	53325975	18.45076884118	3.27572370316022	0.643992111168923	5.08658979877003	3.64559147312211e-07	9.55171068044914e-05	34	178	FFPE-ATAC in FFPE liver
peak_13378	chr11	3001105	3002496	18.2120890339418	4.56131928437548	0.900606957557312	5.06471690685913	4.09007697372568e-07	0.000105155208490065	36	386	FFPE-ATAC in FFPE liver
peak_108157	chrX	72989799	72990513	17.4637575150929	4.06114730292013	0.80214158733452	5.06288087669802	4.12967914199332e-07	0.000105925305113825	25.5	186.5	FFPE-ATAC in FFPE liver
peak_107064	chrUn_random	5899449	5900401	17.7066351060341	3.45410010564273	0.683896155495865	5.05062073808312	4.40376654662903e-07	0.000111651246017432	46.5	246.5	FFPE-ATAC in FFPE liver
peak_27660	chr13	66815010	66815536	18.9477409579576	3.10408601387781	0.615118166962205	5.04632472360149	4.50389685282001e-07	0.000113664896643548	32	142.5	FFPE-ATAC in FFPE liver
peak_58240	chr2	102493013	102493406	40.9383019642718	7.36528101076799	1.46049555049047	5.0430013349199	4.58286052965767e-07	0.000115392433900539	2	254	FFPE-ATAC in FFPE liver
peak_106872	chrUn_random	3564502	3564777	17.2072565014008	3.69503643114398	0.735350072298667	5.02486716237545	5.03781116460079e-07	0.000125409511895927	11	69.5	FFPE-ATAC in FFPE liver
peak_83660	chr6	37562666	37563337	17.7178520409292	4.51891195895681	0.902034769316334	5.00968711259518	5.45185982104667e-07	0.000133894993962936	15	181.5	FFPE-ATAC in FFPE liver
peak_72048	chr4	104478016	104478297	18.7882449404194	-3.071331233591	0.613188959544179	-5.00878430015131	5.47749187011011e-07	0.000133961992161015	147.5	8	FFPE-ATAC in frozen liver
peak_47589	chr18	12867904	12868679	18.7778890434986	-3.0708586150016	0.61310105860053	-5.00873154910411	5.47899312998567e-07	0.000133961992161015	409.5	25	FFPE-ATAC in frozen liver
peak_107003	chrUn_random	5331601	5332072	17.7172504189652	4.51887954885596	0.902375056488228	5.00776203460463	5.50665562233093e-07	0.000134339146861136	12	127	FFPE-ATAC in FFPE liver
peak_65747	chr3	98436056	98436608	17.3019690783502	-3.68442497269682	0.736256301773993	-5.00426952383196	5.60742559612834e-07	0.000136494188330059	277.5	10	FFPE-ATAC in frozen liver
peak_95646	chr8	14306635	14307453	16.9628021818702	3.67173726579493	0.736170205475817	4.98762003471974	6.11276405966095e-07	0.000147811751373048	30.5	205	FFPE-ATAC in FFPE liver
peak_86428	chr6	103264465	103264838	15.4768998044625	7.41349848421467	1.48886885268101	4.97928240681855	6.38204603103292e-07	0.000153448423008173	1.5	92.5	FFPE-ATAC in FFPE liver
peak_44054	chr17	29241268	29241638	17.2067689480881	3.40897933143854	0.686916850538131	4.96272486075708	6.95110184420371e-07	0.000164107292808286	16.5	92	FFPE-ATAC in FFPE liver
peak_107014	chrUn_random	5473900	5475898	17.7067491746853	3.20908771880017	0.647148464978624	4.95881222387845	7.09254793103772e-07	0.000166018551048454	109.5	507	FFPE-ATAC in FFPE liver
peak_69124	chr4	34855333	34855783	17.7020224426979	3.20965132028188	0.647597473933692	4.9562443484925	7.18688236542491e-07	0.000167512342454079	22	114.5	FFPE-ATAC in FFPE liver
peak_29639	chr13	120283777	120284196	17.2136013569493	3.40849207952696	0.688209547309689	4.95269513893153	7.31925968895624e-07	0.000169622904890725	20.5	104.5	FFPE-ATAC in FFPE liver
peak_106933	chrUn_random	4516821	4517964	17.2129583400137	4.47641347385361	0.904239105727149	4.95047542790563	7.40324044987464e-07	0.000170742676434388	26.5	297.5	FFPE-ATAC in FFPE liver
peak_106950	chrUn_random	4739715	4740698	16.7133203193701	3.64865861498026	0.737182533188408	4.94946427881213	7.44180339811861e-07	0.000171272247138126	36	240.5	FFPE-ATAC in FFPE liver
peak_107052	chrUn_random	5879997	5880314	16.7130195083882	3.64864059840619	0.737545577834023	4.94700355891399	7.53645991372914e-07	0.000173087888240397	12.5	77.5	FFPE-ATAC in FFPE liver
peak_93133	chr7	116586190	116586741	19.9660828445981	5.30216525546393	1.07272287358941	4.94271669412855	7.70413985764166e-07	0.00017620170368995	8	170	FFPE-ATAC in FFPE liver
peak_99794	chr8	116616978	116617784	18.2846271571114	-3.02775874693174	0.614780472041837	-4.92494294243896	8.43849733426962e-07	0.000190223136725555	410	26	FFPE-ATAC in frozen liver
peak_109495	chrX	166612409	166613215	19.7141944942423	5.28344720304591	1.07303695232979	4.92382596104862	8.48683225288803e-07	0.000190920682695554	17	245	FFPE-ATAC in FFPE liver
peak_94415	chr7	138593844	138594386	17.0475323465602	-3.37581767308318	0.68671903476906	-4.91586442513342	8.83915553064856e-07	0.000197631636112043	260.5	13.5	FFPE-ATAC in frozen liver
peak_39973	chr16	27702195	27702549	14.4780699215164	7.31726394727127	1.49231675267723	4.90329143202611	9.42440012020361e-07	0.000207665007058149	2	81	FFPE-ATAC in FFPE liver
peak_11354	chr10	87394773	87394973	17.5563644151684	-3.17683124716297	0.648907331329482	-4.89566243712223	9.7975122821631e-07	0.000214259102758595	98	6	FFPE-ATAC in frozen liver
peak_44055	chr17	29243261	29243509	16.719623779947	4.43145045949291	0.905638603975589	4.89317752140826	9.92208323783997e-07	0.000215694300976893	5	63	FFPE-ATAC in FFPE liver
peak_53051	chr19	43577583	43577839	16.7090084670159	3.36251782983847	0.689423034166889	4.8772925521727	1.07551862818865e-06	0.000229711109963383	11.5	62	FFPE-ATAC in FFPE liver
peak_53358	chr19	46801478	46803042	16.21435659437	3.60136227307097	0.739518079952326	4.86987724938806	1.11667596674358e-06	0.000237051783331321	62	371.5	FFPE-ATAC in FFPE liver
peak_67560	chr3	138040450	138041062	16.797936415409	-3.35263306535374	0.688464261994437	-4.86972708741827	1.11752487163609e-06	0.000237051783331321	293.5	14.5	FFPE-ATAC in frozen liver
peak_108159	chrX	72995609	72996162	16.2096298623826	3.60198739219357	0.739753706409101	4.86917113221138	1.12067324091688e-06	0.000237051783331321	21	131.5	FFPE-ATAC in FFPE liver
peak_106865	chrUn_random	3549401	3550449	16.2090282404187	3.60195369861236	0.739747090827456	4.86916912992971	1.1206845952301e-06	0.000237051783331321	39.5	246.5	FFPE-ATAC in FFPE liver
peak_109494	chrX	166610864	166611231	18.9660497177241	5.22614789387685	1.07405939993607	4.86579037824902	1.1400029706462e-06	0.000240020991494731	7.5	107.5	FFPE-ATAC in FFPE liver
peak_48706	chr18	43135334	43135849	16.4642119415316	4.40931598990422	0.906884335755883	4.86204890310414	1.16176910393421e-06	0.000242933664760002	12	127.5	FFPE-ATAC in FFPE liver
peak_70407	chr4	60512166	60512504	17.3020417520297	-3.1537116506743	0.64915049001856	-4.85821346385201	1.18449669100783e-06	0.000246278847036991	164	10	FFPE-ATAC in frozen liver
peak_91171	chr7	67048209	67048451	15.9647606632188	3.92357939988264	0.807777084372613	4.8572551459912	1.19024182377821e-06	0.000247005553225324	8.5	57.5	FFPE-ATAC in FFPE liver
peak_107045	chrUn_random	5807381	5807780	16.2150308900135	4.38625952882105	0.907671469116416	4.8324307616399	1.34876026508326e-06	0.000273693624142525	10	98.5	FFPE-ATAC in FFPE liver
peak_11267	chr10	86410018	86410913	15.9598471889006	3.57773479739839	0.740963889892246	4.82848738812181	1.37574045306934e-06	0.000278142432556495	38.5	208	FFPE-ATAC in FFPE liver
peak_107002	chrUn_random	5327268	5328266	15.9595463779186	3.57771769653748	0.740960586666043	4.82848583436191	1.37575118534334e-06	0.000278142432556495	39	234	FFPE-ATAC in FFPE liver
peak_37814	chr15	91740582	91740822	15.7149779897367	3.89932276576778	0.80917250100085	4.81890173102123	1.44350626267155e-06	0.000290769836738249	8.5	56	FFPE-ATAC in FFPE liver
peak_108156	chrX	72985776	72985991	15.7143763677728	3.89928759121256	0.810411028529347	4.8114937407609	1.49806427053594e-06	0.000300656295582643	7	50.5	FFPE-ATAC in FFPE liver
peak_106984	chrUn_random	5186443	5186771	18.2131782092185	5.1670962318658	1.07685668953429	4.79831372371419	1.60007020069563e-06	0.000316499651716337	6	92	FFPE-ATAC in FFPE liver
peak_93134	chr7	116587727	116588731	15.4663985601826	3.87472136386354	0.81071237334882	4.77940326463525	1.75816238501586e-06	0.000339836799474668	32	230	FFPE-ATAC in FFPE liver
peak_108154	chrX	72979226	72979574	15.4651953162547	3.87465127215621	0.810700266095526	4.77938818352337	1.75829425949492e-06	0.000339836799474668	9.5	80	FFPE-ATAC in FFPE liver
peak_31149	chr14	36610893	36611260	16.7079192917392	3.11595072870813	0.652057590170586	4.77864344450458	1.76481835420858e-06	0.000340498284259002	17.5	87.5	FFPE-ATAC in FFPE liver
peak_106982	chrUn_random	5184541	5184978	17.9666182128141	5.14593131619921	1.07757073913319	4.7754928092597	1.79267697280643e-06	0.000345266439915198	8.5	121	FFPE-ATAC in FFPE liver
peak_106915	chrUn_random	4074260	4074494	17.717737972278	5.12521026786347	1.0772834426092	4.75753182973846	1.9597436309219e-06	0.0003748129190701	2.5	64	FFPE-ATAC in FFPE liver
peak_33658	chr14	106730536	106730922	17.7189412162058	5.12527058509175	1.07757791005586	4.75628772385104	1.97185376218904e-06	0.000376473178898912	6.5	105.5	FFPE-ATAC in FFPE liver
peak_105413	chr9	102548040	102548523	15.9593596355878	3.28971972721431	0.692635357619611	4.74956943942355	2.03850193195439e-06	0.000380593164271913	22.5	110.5	FFPE-ATAC in FFPE liver
peak_106944	chrUn_random	4536139	4536834	15.9596604465698	3.28973693280865	0.692782846554203	4.7485831226499	2.04846693852367e-06	0.000381804327636785	31	159.5	FFPE-ATAC in FFPE liver
peak_50419	chr18	82390226	82390945	15.9643871785573	3.28911384969833	0.693187607632897	4.74491149795656	2.08597517489834e-06	0.000384874690210949	31.5	164.5	FFPE-ATAC in FFPE liver
peak_42252	chr16	92632238	92632896	15.465008573924	3.52732116803899	0.743931429244244	4.74146007196171	2.1218347872418e-06	0.000389526997956842	25.5	150	FFPE-ATAC in FFPE liver
peak_70458	chr4	60733365	60733870	15.5666575121219	-3.51969368739011	0.743026516512845	-4.73696915139537	2.16938172460372e-06	0.000396267712327323	227.5	10.5	FFPE-ATAC in frozen liver
peak_109492	chrX	166578616	166579304	17.4682561097779	5.10415595477504	1.07788595794126	4.73533950152191	2.18688709764947e-06	0.000398801748284146	10	185	FFPE-ATAC in FFPE liver
peak_12617	chr10	117653229	117653463	16.4537106972517	3.09230146853418	0.653839922132077	4.72944732167872	2.25131858680572e-06	0.000409331804849621	11.5	55	FFPE-ATAC in FFPE liver
peak_106983	chrUn_random	5185836	5186061	15.4701087905729	4.31398731295656	0.912168009860157	4.72937799432139	2.25208742978449e-06	0.000409331804849621	4.5	53	FFPE-ATAC in FFPE liver
peak_37018	chr15	79563093	79563337	16.5541563915218	-3.08291665602905	0.652641986517973	-4.72374857841627	2.31536638567543e-06	0.000418064534845123	112	7	FFPE-ATAC in frozen liver
peak_24272	chr12	113535297	113536212	17.2184734362959	5.08277427335075	1.078693865171	4.71197105820657	2.45332228719587e-06	0.000440798975467511	19.5	244	FFPE-ATAC in FFPE liver
peak_8726	chr10	32536273	32536496	12.23183072607	7.07401842218244	1.50315107795028	4.70612603480197	2.52468466725882e-06	0.000452140958330083	0.5	43.5	FFPE-ATAC in FFPE liver
peak_109712	chrY_random	39577290	39577661	15.7101785840698	3.26465475036144	0.694444259401495	4.70110409318534	2.5875855817827e-06	0.00046040151175638	17.5	83	FFPE-ATAC in FFPE liver
peak_101635	chr9	22017586	22017786	15.8111118316526	-3.25638253942522	0.693222769172395	-4.69745467725023	2.63423612966589e-06	0.000466653793722927	90	4.5	FFPE-ATAC in frozen liver
peak_109488	chrX	166505312	166505655	16.9692923847778	5.06110238503226	1.07926872517534	4.6893811216572	2.7403257811347e-06	0.000480568218176914	7.5	89.5	FFPE-ATAC in FFPE liver
peak_3104	chr1	93144864	93145121	16.2036272127877	3.06761609943495	0.654945717935433	4.68377151789757	2.81643945849705e-06	0.000492343216868255	13.5	59	FFPE-ATAC in FFPE liver
peak_53349	chr19	46754171	46754892	14.7170505397365	3.7980737443101	0.814568638611019	4.66268103666067	3.12116310355473e-06	0.000531231638250143	21.5	158	FFPE-ATAC in FFPE liver
peak_53350	chr19	46755584	46756351	14.7173513507185	3.79809213208367	0.814852195391183	4.66108105686619	3.14552803762644e-06	0.000532900020831278	20.5	166.5	FFPE-ATAC in FFPE liver
peak_97980	chr8	77678587	77679606	14.7173513507185	3.79809213208367	0.814852195391183	4.66108105686619	3.14552803762644e-06	0.000532900020831278	37.5	222.5	FFPE-ATAC in FFPE liver
peak_106916	chrUn_random	4074554	4074972	14.7220780827059	3.7973914935773	0.815116002078794	4.65871297323669	3.1819249877364e-06	0.000536582038523332	12.5	91	FFPE-ATAC in FFPE liver
peak_107080	chrX	4240352	4240552	15.4594934776418	3.23905732724104	0.696249214942706	4.65215221464571	3.28488453833603e-06	0.000550561693897814	8.5	44.5	FFPE-ATAC in FFPE liver
peak_854	chr1	37081239	37081451	15.4553683676183	3.23973317307011	0.696554647657928	4.65108255893961	3.30197097308789e-06	0.000552581822250855	10.5	46.5	FFPE-ATAC in FFPE liver
peak_109475	chrX	166413830	166414082	14.9571930069129	3.47721516332151	0.750270385021424	4.63461604341776	3.57600589991974e-06	0.000589333336718489	10.5	55	FFPE-ATAC in FFPE liver
peak_51781	chr19	23431783	23432147	14.7222648250367	4.23875219568125	0.914638185980339	4.63434859888123	3.58063176315785e-06	0.000589333336718489	10	80.5	FFPE-ATAC in FFPE liver
peak_20848	chr12	28065729	28066124	11.4830843275878	6.98288153123055	1.5081143719495	4.63020687363648	3.65300580821402e-06	0.000600345255436443	1	72	FFPE-ATAC in FFPE liver
peak_8798	chr10	36637579	36638122	15.2109140480877	3.21312485305992	0.697615149491052	4.60587023576548	4.10744479018151e-06	0.000667796313043221	29	118.5	FFPE-ATAC in FFPE liver
peak_54260	chr2	4427638	4428156	14.7109338214905	3.44995704939777	0.749123141146645	4.60532702823343	4.11818168836375e-06	0.000667796313043221	23.5	112.5	FFPE-ATAC in FFPE liver
peak_46102	chr17	73228079	73228895	14.4674546085853	4.213447813564	0.916317970156558	4.59823767599375	4.26079759120939e-06	0.000683851784152863	14.5	180	FFPE-ATAC in FFPE liver
peak_68878	chr4	20118868	20119245	15.9704625018317	4.97088767149171	1.08262875529506	4.59149791392428	4.40076041858035e-06	0.000699160462390983	5	92	FFPE-ATAC in FFPE liver
peak_109489	chrX	166508582	166508840	15.9704625018317	4.97088767149171	1.08262875529506	4.59149791392428	4.40076041858035e-06	0.000699160462390983	4	64	FFPE-ATAC in FFPE liver
peak_106897	chrUn_random	3903496	3903850	15.709691030757	3.01641739396597	0.658114663774153	4.58342225147733	4.57427012984415e-06	0.00072150567402934	20	78	FFPE-ATAC in FFPE liver
peak_96766	chr8	42303133	42303960	14.2177860037544	3.74463436470823	0.81798821738537	4.57785856216565	4.69760129573814e-06	0.000737805499171133	23	174.5	FFPE-ATAC in FFPE liver
peak_97839	chr8	74352586	74353021	14.2174851927725	3.74461526522731	0.817985399193099	4.57785098477453	4.69777141691752e-06	0.000737805499171133	15	92.5	FFPE-ATAC in FFPE liver
peak_63501	chr3	43826936	43827289	10.9835189806238	6.91872658903712	1.51188378408315	4.57622911355771	4.73432042841989e-06	0.000742483472789091	0.5	61	FFPE-ATAC in FFPE liver
peak_37813	chr15	91739841	91740348	14.2168835708085	3.74457662187156	0.818887600545473	4.57276019245772	4.81340929821014e-06	0.000749211043154819	14.5	107	FFPE-ATAC in FFPE liver
peak_3823	chr1	125215318	125215688	15.7215822612956	4.94747059351466	1.0836601584775	4.56551858514913	4.98261048231827e-06	0.000768400272071556	4	90	FFPE-ATAC in FFPE liver
peak_97626	chr8	72573426	72574099	14.4620535809543	3.42303978559266	0.750364163444394	4.56183804125172	5.07077557082013e-06	0.000780750088275182	25	141.5	FFPE-ATAC in FFPE liver
peak_8543	chr10	25584246	25584613	14.4673819349057	3.42238560101445	0.750573454740423	4.55969443017145	5.12281077513545e-06	0.000786625803057123	14	76.5	FFPE-ATAC in FFPE liver
peak_87876	chr6	131297502	131298419	14.4664795019598	3.4223286955073	0.750564057721977	4.55967570029179	5.12326768007071e-06	0.000786625803057123	38	193	FFPE-ATAC in FFPE liver
peak_83662	chr6	37568966	37569478	14.9608305636237	3.186625248384	0.698952663507039	4.559143150546	5.13627527378031e-06	0.000787521558423012	22.5	111	FFPE-ATAC in FFPE liver
peak_70507	chr4	61098109	61098337	14.5798329283655	-3.41658284252674	0.750855314015312	-4.55025459466492	5.35810451175695e-06	0.000815836437455186	95.5	4.5	FFPE-ATAC in frozen liver
peak_106896	chrUn_random	3903014	3903280	13.9683041412544	3.71716328735463	0.819991596569825	4.53317241652744	5.81043484876092e-06	0.000867857616505881	7.5	54.5	FFPE-ATAC in FFPE liver
peak_106913	chrUn_random	4068509	4068808	14.4652762580319	3.42222982315502	0.755204653156807	4.53152639996306	5.85590172189712e-06	0.000873460253983135	11.5	63.5	FFPE-ATAC in FFPE liver
peak_6716	chr1	183673053	183674025	13.9729168045906	4.15926656212214	0.919647472803765	4.52267492177369	6.1062985871905e-06	0.000908138834853663	22	206.5	FFPE-ATAC in FFPE liver
peak_51790	chr19	23719608	23719822	10.4845552556237	6.85163712416865	1.51550399288231	4.521028751061	6.15398283918001e-06	0.000911727921819191	1	36	FFPE-ATAC in FFPE liver
peak_53352	chr19	46767423	46767790	14.2175992614237	3.39489031656458	0.752316123773116	4.51258481546039	6.40423112990246e-06	0.000939923659989067	13	76.5	FFPE-ATAC in FFPE liver
peak_106914	chrUn_random	4070878	4071236	14.2179000724057	3.39490754899812	0.752823420915939	4.50956685814534	6.49601202510513e-06	0.000948322734212854	15	74.5	FFPE-ATAC in FFPE liver
peak_106910	chrUn_random	4056425	4056754	14.2182008833876	3.39492351639406	0.753673343403351	4.50450257543097	6.65285911582622e-06	0.000962139870925139	12.5	68	FFPE-ATAC in FFPE liver
peak_30448	chr14	25613676	25614449	10.2353742041056	6.81691166403422	1.51768255182667	4.49165845375862	7.0670692825992e-06	0.00100107088117809	4	124.5	FFPE-ATAC in FFPE liver
peak_62525	chr3	11724290	11724641	10.2353742041056	6.81691166403422	1.51768255182667	4.49165845375862	7.0670692825992e-06	0.00100107088117809	1.5	56	FFPE-ATAC in FFPE liver
peak_107050	chrUn_random	5821854	5822506	13.7179198458084	3.68909919842595	0.82219806594503	4.48687408937859	7.22757584430355e-06	0.00102117181951543	21.5	132	FFPE-ATAC in FFPE liver
peak_37130	chr15	81192983	81193321	13.8412142895018	-3.68446934864795	0.821371895030628	-4.48575045109203	7.26577422822782e-06	0.00102138799529466	135.5	5	FFPE-ATAC in frozen liver
peak_20568	chr12	19178763	19179789	14.9716326188855	4.87465303695006	1.08686022730918	4.48507813099261	7.2887221681975e-06	0.00102138799529466	20.5	233.5	FFPE-ATAC in FFPE liver
peak_106961	chrUn_random	4774182	4774532	14.9716326188855	4.87465303695006	1.08686022730918	4.48507813099261	7.2887221681975e-06	0.00102138799529466	5.5	80.5	FFPE-ATAC in FFPE liver
peak_106980	chrUn_random	5182825	5183191	13.7234349420906	4.13178822626295	0.92126303457473	4.48491697940561	7.29423295753378e-06	0.00102138799529466	8.5	76.5	FFPE-ATAC in FFPE liver
peak_94414	chr7	138592507	138593222	13.8256441072808	-4.12618019446246	0.920220916017737	-4.48390177036894	7.32904108279104e-06	0.00102495472498074	293	10	FFPE-ATAC in frozen liver
peak_75497	chr4	154290489	154290751	13.8409134785198	-3.68451631511444	0.822176522062741	-4.48141757425818	7.4148870281398e-06	0.00103564085602572	105	5	FFPE-ATAC in frozen liver
peak_70406	chr4	60511261	60511480	13.815889832324	-4.1254763471763	0.920961743476582	-4.47953063891975	7.48073521702507e-06	0.00104351028317691	91.5	3	FFPE-ATAC in frozen liver
peak_106917	chrUn_random	4076439	4076639	13.7222316981627	4.13168720067771	0.924762467236823	4.4678361709717	7.90147807191261e-06	0.00108197989277981	4	41	FFPE-ATAC in FFPE liver
peak_671	chr1	33155581	33156024	14.080941877045	-3.36185544039484	0.753008424482977	-4.46456550961315	8.02313985099184e-06	0.00109550785569868	178.5	9.5	FFPE-ATAC in frozen liver
peak_77466	chr5	61883667	61883961	9.98438828669567	6.78116540504356	1.52062207825056	4.45946793883536	8.21633622692804e-06	0.0011169495017484	1.5	47.5	FFPE-ATAC in FFPE liver
peak_50397	chr18	81552944	81553300	14.4615660276416	3.13217685799458	0.702724201211165	4.45719224212883	8.30401290459346e-06	0.00112582972894754	18.5	72.5	FFPE-ATAC in FFPE liver
peak_67836	chr3	145763953	145764732	14.4612652166596	3.13215768363582	0.702895863889951	4.45607641835009	8.34732874313092e-06	0.00112993600092436	33	162	FFPE-ATAC in FFPE liver
peak_89181	chr7	6836064	6836931	14.7236548112953	4.84966118048023	1.08887027572355	4.45384660469095	8.43453709426965e-06	0.00113702104115993	17	194	FFPE-ATAC in FFPE liver
peak_74899	chr4	146777714	146777946	13.4686247256391	4.10452272770669	0.923548963412747	4.44429357869608	8.81811252480016e-06	0.00116915605203513	5.5	47	FFPE-ATAC in FFPE liver
peak_95925	chr8	23738660	23739393	13.5868916263631	-3.65595891551577	0.822751000949742	-4.44357881217467	8.84747260151871e-06	0.00117163376316927	290.5	12.5	FFPE-ATAC in frozen liver
peak_99801	chr8	116649658	116649929	13.5919191693325	-3.65629824132668	0.82312581212724	-4.44196766455125	8.91399581375249e-06	0.00117618674811245	108	5	FFPE-ATAC in frozen liver
peak_108233	chrX	79499261	79499470	9.73580885714153	6.74473598504184	1.52089816641654	4.43470584288586	9.21980900722273e-06	0.00120495220550228	0.5	32	FFPE-ATAC in FFPE liver
peak_4889	chr1	144973991	144974699	14.4723680829035	4.82402545057029	1.08924591186105	4.42877535553759	9.47696697207183e-06	0.00122977649073406	11	158.5	FFPE-ATAC in FFPE liver
peak_41010	chr16	45352973	45353362	14.4723680829035	4.82402545057029	1.08924591186105	4.42877535553759	9.47696697207183e-06	0.00122977649073406	6.5	86.5	FFPE-ATAC in FFPE liver
peak_109560	chrY_random	5294796	5295155	13.7130063714902	3.33898418411407	0.756539448267979	4.41349646969281	1.0171437747529e-05	0.00129991921695166	14	71	FFPE-ATAC in FFPE liver
peak_26601	chr13	46479919	46480363	13.7127055605083	3.33896473856421	0.75671739423719	4.4124329161616	1.0221547070341e-05	0.00130480425456872	17	86.5	FFPE-ATAC in FFPE liver
peak_71063	chr4	78524988	78525212	13.7124047495263	3.33894659503865	0.757259343947952	4.40925109967101	1.03728699209983e-05	0.00131799077870036	8	44.5	FFPE-ATAC in FFPE liver
peak_85116	chr6	73405330	73405867	13.7124047495263	3.33894659503865	0.757259343947952	4.40925109967101	1.03728699209983e-05	0.00131799077870036	19.5	106.5	FFPE-ATAC in FFPE liver
peak_1196	chr1	44899852	44900197	9.4860261836595	6.70724737995392	1.52264935486574	4.40498487620963	1.05791258346643e-05	0.00133804495897954	2	53	FFPE-ATAC in FFPE liver
peak_82881	chr6	18112147	18112498	9.48632699464147	6.70727598883839	1.52283841775925	4.40445677664718	1.06049282006336e-05	0.00133804495897954	1	52.5	FFPE-ATAC in FFPE liver
peak_109540	chrY	2536847	2537198	9.48632699464147	6.70727598883839	1.52283841775925	4.40445677664718	1.06049282006336e-05	0.00133804495897954	1	53.5	FFPE-ATAC in FFPE liver
peak_4886	chr1	143456197	143456428	14.2117833541596	3.10415238132606	0.704851179164536	4.40398267476183	1.06281434798565e-05	0.00133804495897954	12	46.5	FFPE-ATAC in FFPE liver
peak_6681	chr1	182966766	182967049	13.8514561177713	-3.33507098713721	0.757479682013064	-4.40285207158823	1.06837015718463e-05	0.00134079880003479	111	6	FFPE-ATAC in frozen liver
peak_49504	chr18	62913088	62914083	9.48542456169556	6.7071899395106	1.52339510832328	4.40279078150174	1.06867212908467e-05	0.00134079880003479	7	150	FFPE-ATAC in FFPE liver
peak_75852	chr5	9844344	9844697	9.48542456169556	6.7071899395106	1.52339510832328	4.40279078150174	1.06867212908467e-05	0.00134079880003479	1	53	FFPE-ATAC in FFPE liver
peak_72336	chr4	107769170	107769595	14.3250953855937	-3.09855453178566	0.704385850680134	-4.39894488055628	1.08778447464394e-05	0.00136011466299415	174	10.5	FFPE-ATAC in frozen liver
peak_58723	chr2	114179465	114180176	14.2073574331541	3.10486527269161	0.706094054507058	4.39724035753168	1.09635914294926e-05	0.00136927648546203	37.5	143.5	FFPE-ATAC in FFPE liver
peak_106909	chrUn_random	4055679	4056145	14.2222845984395	4.79800063359864	1.09147726162127	4.39587777254445	1.10326005335449e-05	0.00137320852513956	7	102.5	FFPE-ATAC in FFPE liver
peak_26328	chr13	41429884	41430266	13.2192569317903	3.63142340657891	0.826258656652756	4.39502010337794	1.10762502699328e-05	0.0013770802161761	11	75	FFPE-ATAC in FFPE liver
peak_39960	chr16	26976760	26976986	13.2236828527958	3.63061076807505	0.827312937500576	4.38843707562898	1.14168156120753e-05	0.00140667725556592	6.5	44	FFPE-ATAC in FFPE liver
peak_7341	chr1	194488957	194489436	9.23624351017748	6.66875861608053	1.5245781916919	4.37416634477754	1.21897405267991e-05	0.00148187059832206	2.5	69	FFPE-ATAC in FFPE liver
peak_21802	chr12	67175569	67175773	9.23624351017748	6.66875861608053	1.5245781916919	4.37416634477754	1.21897405267991e-05	0.00148187059832206	1	30	FFPE-ATAC in FFPE liver
peak_109621	chrY_random	16473216	16473567	9.23624351017748	6.66875861608053	1.5245781916919	4.37416634477754	1.21897405267991e-05	0.00148187059832206	0.5	50.5	FFPE-ATAC in FFPE liver
peak_8742	chr10	33590469	33590717	9.23564188821354	6.66869942237579	1.52576166454304	4.37073468114236	1.23829184256159e-05	0.00149879731828284	1.5	36.5	FFPE-ATAC in FFPE liver
peak_95816	chr8	19906903	19907206	12.9749893545904	4.04606240032598	0.92717779922109	4.36384736964693	1.27794756207855e-05	0.00153663046344519	6	59	FFPE-ATAC in FFPE liver
peak_94517	chr7	140680710	140680989	21.4684891158806	6.42593997404543	1.47399346657292	4.35954440760578	1.30333504204015e-05	0.0015603208751386	1	94	FFPE-ATAC in FFPE liver
peak_100549	chr8	126061906	126062358	13.4679504299956	3.30908750637879	0.759166258474697	4.35884428402725	1.30751101923242e-05	0.00156361511113675	19.5	89	FFPE-ATAC in FFPE liver
peak_21619	chr12	56639336	56639939	13.4676496190137	3.30906342391206	0.759921744759273	4.35447919043336	1.33383649871878e-05	0.00158990124501462	20.5	116	FFPE-ATAC in FFPE liver
peak_34388	chr15	6822589	6823310	13.9620006806776	3.07557266552605	0.707211965820381	4.34886966591171	1.36841003097995e-05	0.00161880842253243	36	141.5	FFPE-ATAC in FFPE liver
peak_86348	chr6	100265184	100265543	13.9629031136235	3.07563240492362	0.707789263830106	4.34540697647807	1.39017676500358e-05	0.0016315957989913	18	70.5	FFPE-ATAC in FFPE liver
peak_8739	chr10	33570590	33570946	12.9700758802722	3.60170783992196	0.82933379955078	4.34289286397453	1.40618717946546e-05	0.0016315957989913	10.5	68	FFPE-ATAC in FFPE liver
peak_65805	chr3	99784968	99785305	12.9700758802722	3.60170783992196	0.82933379955078	4.34289286397453	1.40618717946546e-05	0.0016315957989913	10	64	FFPE-ATAC in FFPE liver
peak_100340	chr8	123872942	123873420	12.9688726363443	3.60162256856099	0.829323249381107	4.34284529132488	1.40649182112833e-05	0.0016315957989913	15	91	FFPE-ATAC in FFPE liver
peak_53534	chr19	49929389	49929602	8.98676164767742	6.62924495804073	1.52656044014013	4.34260235214282	1.40804851601876e-05	0.0016315957989913	0	30	FFPE-ATAC in FFPE liver
peak_102751	chr9	48594982	48595215	12.9644467153389	3.60244931645397	0.8296623397216	4.34206681921081	1.41148588588582e-05	0.0016315957989913	8.5	44.5	FFPE-ATAC in FFPE liver
peak_107854	chrX	49663287	49663493	8.98706245865939	6.62927508455683	1.52676958962159	4.34202719887805	1.41174051052036e-05	0.0016315957989913	0	29.5	FFPE-ATAC in FFPE liver
peak_109566	chrY_random	6521840	6522047	8.98646083669545	6.62921482291252	1.52676533641448	4.34199982459705	1.41191646008119e-05	0.0016315957989913	1	29.5	FFPE-ATAC in FFPE liver
peak_5668	chr1	164880006	164880230	8.98616002571348	6.62918445555805	1.52738794079032	4.34021002688282	1.4234659712232e-05	0.00164321259502475	1	32.5	FFPE-ATAC in FFPE liver
peak_2667	chr1	85253707	85253952	13.7289500383727	4.74383991712473	1.09346055454642	4.33837315612406	1.435412900847e-05	0.00164833748606574	4	51.5	FFPE-ATAC in FFPE liver
peak_17150	chr11	83368667	83369722	12.719577516175	4.01707549305953	0.930261646009597	4.31822112659484	1.57291801363822e-05	0.00177104115338685	26	198.5	FFPE-ATAC in FFPE liver
peak_78094	chr5	76426895	76427122	12.7261091140543	4.01635113423514	0.93090939643381	4.31443827897887	1.60009228545421e-05	0.00179709339101402	4.5	42.5	FFPE-ATAC in FFPE liver
peak_107016	chrUn_random	5483612	5484164	12.7192767051931	4.01705812408499	0.931116447755253	4.31423817479475	1.60154213508225e-05	0.00179709339101402	12	104.5	FFPE-ATAC in FFPE liver
peak_83827	chr6	39826656	39826862	8.73758059615934	6.58864955100195	1.52931792695329	4.30822750121543	1.645680665787e-05	0.00183452672684121	1	29	FFPE-ATAC in FFPE liver
peak_8744	chr10	33592523	33592828	8.73667816321343	6.58855646075604	1.52931214579087	4.30818291667253	1.64601235727366e-05	0.00183452672684121	1	42	FFPE-ATAC in FFPE liver
peak_71470	chr4	91539691	91539922	13.2140426464901	3.28012663768947	0.76154635521044	4.3071923530946	1.65339821625125e-05	0.00184088954947544	8.5	44	FFPE-ATAC in FFPE liver
peak_64276	chr3	68047491	68047699	8.73637735223146	6.58852501740584	1.53019548079548	4.30567538598451	1.66477031045402e-05	0.00184979908352179	1	28.5	FFPE-ATAC in FFPE liver
peak_29029	chr13	105299693	105300327	12.7196915848262	3.57128045882447	0.831141381035878	4.29683870916578	1.73251159690752e-05	0.00190715809837059	19	120	FFPE-ATAC in FFPE liver
peak_27533	chr13	64198113	64198411	13.8418885851453	-3.04259594785021	0.708127453702254	-4.29667841847229	1.73376429634805e-05	0.00190715809837059	114.5	7.5	FFPE-ATAC in frozen liver
peak_71898	chr4	101391697	101392073	13.7128196291595	3.04645603693804	0.709435433208611	4.29419774419729	1.75326157383607e-05	0.00192098921049367	16	73	FFPE-ATAC in FFPE liver
peak_79622	chr5	112316706	112316927	13.7125188181775	3.04643571405143	0.709432283205228	4.29418816449623	1.7533372704882e-05	0.00192098921049367	9	42.5	FFPE-ATAC in FFPE liver
peak_109097	chrX	145317018	145317218	12.7146640418568	3.57208338131501	0.832259323040582	4.29203168102069	1.77045680122065e-05	0.00193470632907402	7	37.5	FFPE-ATAC in FFPE liver
peak_74943	chr4	147505386	147505757	13.7131204401414	3.04647633479242	0.709831073892802	4.29183286959412	1.7720430854275e-05	0.00193470632907402	15	72	FFPE-ATAC in FFPE liver
peak_15541	chr11	58035772	58036095	13.8421893961272	-3.0425568548923	0.708935697075935	-4.29172471839347	1.77290657495238e-05	0.00193470632907402	125	8.5	FFPE-ATAC in frozen liver
peak_97381	chr8	66077286	66077845	12.7190899628623	3.57123643213383	0.832295432338811	4.2908278639694	1.78008260900617e-05	0.00194060823137345	14	104.5	FFPE-ATAC in FFPE liver
peak_62569	chr3	14785440	14785704	13.8265051452551	-3.04161806737024	0.709363259328812	-4.28781449753708	1.80439680723475e-05	0.00195602142981683	102.5	6.5	FFPE-ATAC in frozen liver
peak_81369	chr5	138129597	138129805	13.7119171962136	3.04639448462864	0.710608227001964	4.2870239449398	1.81082780492385e-05	0.00195663865405852	10	40	FFPE-ATAC in FFPE liver
peak_42468	chr16	95725413	95725838	13.7068896532442	3.04709964682042	0.711554064038952	4.28231641250751	1.84957718436563e-05	0.00198096032074969	20.5	82	FFPE-ATAC in FFPE liver
peak_2215	chr1	74030792	74031004	12.4754240076264	3.98589937828887	0.931760068366356	4.2778173411931	1.88734787738126e-05	0.00200575931584503	6	39.5	FFPE-ATAC in FFPE liver
peak_109096	chrX	145312870	145313321	12.4754240076264	3.98589937828887	0.931760068366356	4.2778173411931	1.88734787738126e-05	0.00200575931584503	10	83	FFPE-ATAC in FFPE liver
peak_87598	chr6	125607554	125608336	13.2246579594212	4.6891219003623	1.09630800176979	4.27719390243669	1.8926393811721e-05	0.00200943756193863	13	156	FFPE-ATAC in FFPE liver
peak_23239	chr12	94815358	94815737	12.470095653675	3.98672034674787	0.932335388619154	4.27605816041419	1.90231545416943e-05	0.0020177593514413	10.5	70.5	FFPE-ATAC in FFPE liver
peak_3386	chr1	104490482	104490704	8.48749711169534	6.5467828788401	1.53141799661206	4.27498102629295	1.91153573018546e-05	0.00201973343595274	1	30	FFPE-ATAC in FFPE liver
peak_4950	chr1	149524651	149525002	8.48749711169534	6.5467828788401	1.53141799661206	4.27498102629295	1.91153573018546e-05	0.00201973343595274	0.5	47	FFPE-ATAC in FFPE liver
peak_109615	chrY_random	15129175	15129395	8.48749711169534	6.5467828788401	1.53141799661206	4.27498102629295	1.91153573018546e-05	0.00201973343595274	0.5	29.5	FFPE-ATAC in FFPE liver
peak_59620	chr2	131788240	131788450	8.48779792267731	6.54681479167898	1.53165170947339	4.27434954773753	1.91696096642739e-05	0.00202351819091697	0.5	28.5	FFPE-ATAC in FFPE liver
peak_20605	chr12	20928584	20929093	8.48659467874943	6.5466860774126	1.53352918348881	4.26903260003096	1.96322577102219e-05	0.00206441463954585	3.5	68	FFPE-ATAC in FFPE liver
peak_32500	chr14	66338623	66339836	13.0887889393372	-3.24601952916229	0.762382458230766	-4.25773113496763	2.06512103014698e-05	0.00214891992237503	450.5	25.5	FFPE-ATAC in frozen liver
peak_65745	chr3	98423422	98423770	13.0837613963678	-3.24566019112256	0.762929350860894	-4.25420805669638	2.09790171543528e-05	0.00217376347099162	131	6.5	FFPE-ATAC in frozen liver
peak_43413	chr17	20300885	20301266	12.9642599730081	3.24974993138934	0.764008692723074	4.25355099011584	2.10406998904388e-05	0.00217376347099162	16	71.5	FFPE-ATAC in FFPE liver
peak_12665	chr10	118388585	118389732	12.9692875159775	3.24899298605345	0.763873981116484	4.25331018776776	2.10633486377653e-05	0.00217376347099162	42	213.5	FFPE-ATAC in FFPE liver
peak_96785	chr8	43370789	43371158	12.9692875159775	3.24899298605345	0.763873981116484	4.25331018776776	2.10633486377653e-05	0.00217376347099162	15	69	FFPE-ATAC in FFPE liver
peak_108153	chrX	72975435	72975653	12.9692875159775	3.24899298605345	0.763873981116484	4.25331018776776	2.10633486377653e-05	0.00217376347099162	8.5	40.5	FFPE-ATAC in FFPE liver
peak_18215	chr11	99503161	99503558	12.9689867049955	3.24897149212123	0.763871125571761	4.2532979495584	2.10645003262906e-05	0.00217376347099162	15.5	73.5	FFPE-ATAC in FFPE liver
peak_61032	chr2	161167034	161167775	12.9695883269595	3.24901278395418	0.764286685394583	4.2510393626402	2.12780763935659e-05	0.00219130253711263	32.5	138	FFPE-ATAC in FFPE liver
peak_106970	chrUn_random	5161726	5162571	12.4696081003622	3.5402192198133	0.834526311952561	4.24219005333716	2.2134911897754e-05	0.00225835758647521	27.5	154.5	FFPE-ATAC in FFPE liver
peak_98615	chr8	91443289	91443590	12.965162405954	3.2498250816681	0.766504876082608	4.23979700987298	2.23722002701428e-05	0.00226954359975834	12.5	55.5	FFPE-ATAC in FFPE liver
peak_389	chr1	19819717	19819919	8.23801524919529	6.50373065472014	1.53454404296117	4.23821700299333	2.25301947304964e-05	0.00226954359975834	0	26.5	FFPE-ATAC in FFPE liver
peak_109599	chrY_random	10887564	10887765	8.23801524919529	6.50373065472014	1.53454404296117	4.23821700299333	2.25301947304964e-05	0.00226954359975834	0	26	FFPE-ATAC in FFPE liver
peak_109672	chrY_random	27597970	27598310	8.23801524919529	6.50373065472014	1.53454404296117	4.23821700299333	2.25301947304964e-05	0.00226954359975834	1	43.5	FFPE-ATAC in FFPE liver
peak_48002	chr18	28219238	28219444	8.23771443821332	6.50369771940305	1.534542924388	4.23819862972997	2.25320382153238e-05	0.00226954359975834	1	27	FFPE-ATAC in FFPE liver
peak_84824	chr6	69996861	69997061	8.23771443821332	6.50369771940305	1.534542924388	4.23819862972997	2.25320382153238e-05	0.00226954359975834	0	26	FFPE-ATAC in FFPE liver
peak_88720	chr6	145131920	145132265	13.4630369556774	3.01669812641521	0.711884696480734	4.23762182461364	2.25899851151408e-05	0.00226954359975834	16.5	66	FFPE-ATAC in FFPE liver
peak_22136	chr12	74719426	74719629	8.23831606017726	6.50376371255356	1.53504141470147	4.23686530556467	2.2666201428739e-05	0.00226954359975834	0	26	FFPE-ATAC in FFPE liver
peak_109686	chrY_random	30930939	30931140	8.23741362723135	6.5036646401896	1.53503806184048	4.23681001915473	2.26717809019584e-05	0.00226954359975834	0	27	FFPE-ATAC in FFPE liver
peak_9467	chr10	55543556	55543929	13.4627361446955	3.01667729503776	0.712085543506193	4.23639732971426	2.2713470600023e-05	0.00226954359975834	16.5	71	FFPE-ATAC in FFPE liver
peak_75318	chr4	151239738	151240275	13.4627361446955	3.01667729503776	0.712085543506193	4.23639732971426	2.2713470600023e-05	0.00226954359975834	24	102.5	FFPE-ATAC in FFPE liver
peak_11919	chr10	98206141	98206348	8.23861687115923	6.50379715935595	1.53604500257131	4.23411888874918	2.29449541158057e-05	0.00227482938590618	1	27	FFPE-ATAC in FFPE liver
peak_24777	chr13	8695429	8695667	13.5772100250858	-3.01228250059099	0.712249529369894	-4.22925165462147	2.34469950253712e-05	0.00230441769102979	91	5.5	FFPE-ATAC in frozen liver
peak_97173	chr8	57977238	57977567	13.4618337117496	3.01661292268389	0.715187168098385	4.21793490885019	2.46549963905398e-05	0.00239738720881298	15.5	62.5	FFPE-ATAC in FFPE liver
peak_88981	chr6	149116254	149117435	12.8445213621373	-3.21582021587874	0.764899638774857	-4.20423811551217	2.61963047770774e-05	0.00251605996039574	423.5	22	FFPE-ATAC in frozen liver
peak_3006	chr1	91307958	91308290	7.98853338669524	6.4593542498649	1.53845215751146	4.19860586390498	2.68563293986268e-05	0.0025664599244161	1	42.5	FFPE-ATAC in FFPE liver
peak_84725	chr6	63132666	63132868	7.98853338669524	6.4593542498649	1.53845215751146	4.19860586390498	2.68563293986268e-05	0.0025664599244161	0.5	25.5	FFPE-ATAC in FFPE liver
peak_56186	chr2	39466158	39466358	7.98793176473129	6.45928591843852	1.53845129953272	4.19856378970228	2.68613189272652e-05	0.0025664599244161	0	25.5	FFPE-ATAC in FFPE liver
peak_63087	chr3	30782304	30783637	12.7195048424955	3.21794647714645	0.766565311006128	4.19787646394127	2.69429529806536e-05	0.00257202114884273	52.5	241.5	FFPE-ATAC in FFPE liver
peak_49142	chr18	56098974	56099432	12.7198056534775	3.2179675806612	0.766781822640448	4.19671865665774	2.70810000448761e-05	0.00257913318391709	16.5	83.5	FFPE-ATAC in FFPE liver
peak_60101	chr2	146044475	146044836	12.2207278598261	3.50856618664535	0.836535496382407	4.19416295162384	2.73881051593416e-05	0.00259661802953766	12	63.5	FFPE-ATAC in FFPE liver
peak_10391	chr10	74881913	74882290	12.2204270488442	3.50854338837518	0.836532919511594	4.19414861811251	2.7389836840661e-05	0.00259661802953766	14	67	FFPE-ATAC in FFPE liver
peak_87977	chr6	134520078	134520427	12.7189032205315	3.21789861328861	0.767417163400442	4.19315434519346	2.75102128157109e-05	0.00260577970070885	12	64.5	FFPE-ATAC in FFPE liver
peak_12404	chr10	114234603	114234881	12.3356892935291	-3.50572806014938	0.837473504917172	-4.18607638279387	2.83817873434629e-05	0.00267678779755387	101.5	4	FFPE-ATAC in frozen liver
peak_91157	chr7	66929867	66930149	12.2195246158983	3.50847347500019	0.839079197083434	4.1813376939809	2.8979908197479e-05	0.0027076847962306	8	50.5	FFPE-ATAC in FFPE liver
peak_43196	chr17	13560555	13560957	11.9749562277164	3.92302368551443	0.940747291010118	4.17011425172654	3.04446971062708e-05	0.00279686133307407	8.5	72.5	FFPE-ATAC in FFPE liver
peak_58155	chr2	99023302	99023503	7.73875071321321	6.41353416069033	1.5428339587171	4.15698275530785	3.22478321999716e-05	0.00291405617623937	0.5	24.5	FFPE-ATAC in FFPE liver
peak_68985	chr4	30828738	30828939	7.73844990223124	6.41349864860866	1.54283449606363	4.15695829006415	3.22512844128842e-05	0.00291405617623937	0.5	24.5	FFPE-ATAC in FFPE liver
peak_75066	chr4	148996707	148997378	7.73844990223124	6.41349864860866	1.54283449606363	4.15695829006415	3.22512844128842e-05	0.00291405617623937	4	82.5	FFPE-ATAC in FFPE liver
peak_34121	chr14	122891202	122891406	7.73905152419518	6.41356980845255	1.54340952923387	4.15545562404047	3.2463995209581e-05	0.00292219521642323	1	25.5	FFPE-ATAC in FFPE liver
peak_10475	chr10	75773487	75774277	7.73814909124927	6.41346297461334	1.54341117542837	4.15538197255395	3.24744551792782e-05	0.00292219521642323	2.5	96.5	FFPE-ATAC in FFPE liver
peak_53610	chr19	53821348	53821554	7.73814909124927	6.41346297461334	1.54341117542837	4.15538197255395	3.24744551792782e-05	0.00292219521642323	1	25.5	FFPE-ATAC in FFPE liver
peak_90690	chr7	51253800	51254000	7.73814909124927	6.41346297461334	1.54341117542837	4.15538197255395	3.24744551792782e-05	0.00292219521642323	1	24.5	FFPE-ATAC in FFPE liver
peak_101801	chr9	29641868	29642077	7.73814909124927	6.41346297461334	1.54341117542837	4.15538197255395	3.24744551792782e-05	0.00292219521642323	1	26	FFPE-ATAC in FFPE liver
peak_82491	chr6	4942939	4943144	7.7378482802673	6.41342684146505	1.54457642041762	4.15222371433781	3.29260148872724e-05	0.0029531461113886	0	25	FFPE-ATAC in FFPE liver
peak_54088	chr19	61000454	61000817	11.9709451863441	3.47613290312355	0.839360043565348	4.141408600245	3.45179420681308e-05	0.00305844568053388	10.5	64	FFPE-ATAC in FFPE liver
peak_59934	chr2	141809481	141810364	11.9709451863441	3.47613290312355	0.839360043565348	4.141408600245	3.45179420681308e-05	0.00305844568053388	29.5	154	FFPE-ATAC in FFPE liver
peak_33312	chr14	91826649	91827008	12.4700229799954	3.18623911065458	0.769503946544254	4.14064037613268	3.46337582066676e-05	0.00306533457421135	14.5	64	FFPE-ATAC in FFPE liver
peak_31676	chr14	51360633	51360864	11.9712459973261	3.47615624932503	0.839582739222369	4.14033791659972	3.46794576581603e-05	0.00306533457421135	7.5	40.5	FFPE-ATAC in FFPE liver
peak_8731	chr10	33506332	33506619	12.465296248008	3.18705592004579	0.770095175131794	4.13852212423011	3.49550169758645e-05	0.00307730290186639	12	50.5	FFPE-ATAC in FFPE liver
peak_98669	chr8	92039559	92040860	12.465296248008	3.18705592004579	0.770095175131794	4.13852212423011	3.49550169758645e-05	0.00307730290186639	53.5	234	FFPE-ATAC in FFPE liver
peak_106878	chrUn_random	3577935	3578776	11.7260759871803	3.8906667753745	0.940241416651386	4.1379444751869	3.50431143935818e-05	0.00308258665163606	18	146	FFPE-ATAC in FFPE liver
peak_68537	chr4	8948686	8949252	12.4640930040801	3.18696869225109	0.770985741657731	4.1336285745034	3.57080383287493e-05	0.00313354448902353	22	100.5	FFPE-ATAC in FFPE liver
peak_34172	chr14	123790518	123790813	12.2249256435292	4.57119217056454	1.10709383875353	4.12900154490176	3.64341955756335e-05	0.00317932641507867	4	55	FFPE-ATAC in FFPE liver
peak_86738	chr6	114528582	114528794	12.4637921930981	3.18695071473215	0.772350704897971	4.12630000143931	3.68646308196219e-05	0.00318774319818257	8	38	FFPE-ATAC in FFPE liver
peak_27638	chr13	66399584	66399913	11.9668200763206	3.47708632997658	0.842680679259999	4.1262205430294	3.68773636757897e-05	0.00318774319818257	11.5	56.5	FFPE-ATAC in FFPE liver
peak_33596	chr14	105082166	105082371	7.48866722874922	6.36617350783243	1.5487990020555	4.11039360135402	3.94985252995934e-05	0.00334066841749974	0.5	24	FFPE-ATAC in FFPE liver
peak_107616	chrX	35334075	35334339	7.48866722874922	6.36617350783243	1.5487990020555	4.11039360135402	3.94985252995934e-05	0.00334066841749974	1	31	FFPE-ATAC in FFPE liver
peak_42085	chr16	90905669	90905948	7.48956966169513	6.3662852822787	1.54974156096031	4.10796576839159	3.99159246089153e-05	0.00335694761922443	1	33	FFPE-ATAC in FFPE liver
peak_83677	chr6	37743831	37744034	7.48956966169513	6.3662852822787	1.54974156096031	4.10796576839159	3.99159246089153e-05	0.00335694761922443	1	24.5	FFPE-ATAC in FFPE liver
peak_18657	chr11	104497663	104498272	7.48836641776725	6.3661360118013	1.54974824302407	4.10785173685944	3.99356317642134e-05	0.00335694761922443	3.5	72	FFPE-ATAC in FFPE liver
peak_80078	chr5	118817762	118818071	7.48836641776725	6.3661360118013	1.54974824302407	4.10785173685944	3.99356317642134e-05	0.00335694761922443	1.5	37	FFPE-ATAC in FFPE liver
peak_81981	chr5	146345315	146345813	7.48836641776725	6.3661360118013	1.54974824302407	4.10785173685944	3.99356317642134e-05	0.00335694761922443	2.5	59.5	FFPE-ATAC in FFPE liver
peak_74894	chr4	146711053	146711269	11.976647024957	4.54026766298287	1.10610940404899	4.1047184359548	4.04807616775102e-05	0.0033891276039316	3	39	FFPE-ATAC in FFPE liver
peak_27611	chr13	65690528	65690909	11.4768949356622	3.85752726651901	0.942262851767165	4.09389721698613	4.24182406584649e-05	0.00351185284896451	8	64	FFPE-ATAC in FFPE liver
peak_71997	chr4	103059868	103060623	12.3610137507069	-3.15384284811671	0.771132713417671	-4.08988335372109	4.31590185993554e-05	0.00355708725289477	258	16	FFPE-ATAC in frozen liver
peak_78313	chr5	87566704	87566952	12.3610137507069	-3.15384284811671	0.771132713417671	-4.08988335372109	4.31590185993554e-05	0.00355708725289477	86.5	5	FFPE-ATAC in frozen liver
peak_86837	chr6	115724367	115724635	11.4762933136983	3.85747105658831	0.94354501544296	4.08827453216672	4.34593659249877e-05	0.00357647125233214	6	46	FFPE-ATAC in FFPE liver
peak_74896	chr4	146717876	146718097	11.7208617018801	3.44292948006738	0.842871668408597	4.0847611909508	4.41221708137873e-05	0.00362136665236655	6	38	FFPE-ATAC in FFPE liver
peak_41566	chr16	72352956	72353345	12.2202403065134	3.15379663521358	0.772464050265894	4.0827746406166	4.45011727152962e-05	0.00363495776923953	16	68.5	FFPE-ATAC in FFPE liver
peak_81582	chr5	140347378	140348428	12.215513574526	3.15463163502185	0.77284399690992	4.08184788603532	4.46790369702968e-05	0.00364677275660681	42	184.5	FFPE-ATAC in FFPE liver
peak_9538	chr10	57701833	57702589	12.2205411174954	3.15381875541051	0.772700649486024	4.08155313122661	4.47357479771217e-05	0.00364868881773878	27.5	131.5	FFPE-ATAC in FFPE liver
peak_82421	chr5	152442634	152442858	12.2158143855079	3.1546576404381	0.773551995536723	4.07814556570211	4.53963420466072e-05	0.00368982808413668	7.5	39.5	FFPE-ATAC in FFPE liver
peak_74907	chr4	146893078	146893308	12.2146111415801	3.15456475797418	0.773540741583402	4.07808482267778	4.54082012522081e-05	0.00368982808413668	9	40.5	FFPE-ATAC in FFPE liver
peak_78954	chr5	99852334	99853091	12.2196386845495	3.15374624730167	0.773396838974435	4.077785282241	4.54667252132862e-05	0.00369185100639036	32.5	133	FFPE-ATAC in FFPE liver
peak_2672	chr1	85323395	85323618	11.72236575679	3.44305006621665	0.845228527514601	4.07351379435921	4.63091073120538e-05	0.00374363778337598	7	38	FFPE-ATAC in FFPE liver
peak_25172	chr13	20328262	20328837	12.2193378735675	3.15371762497435	0.774579083705955	4.07152438184293	4.67064723269213e-05	0.00376190993288463	21.5	100.5	FFPE-ATAC in FFPE liver
peak_101370	chr9	15294786	15295184	12.2193378735675	3.15371762497435	0.774579083705955	4.07152438184293	4.67064723269213e-05	0.00376190993288463	16.5	70.5	FFPE-ATAC in FFPE liver
peak_47032	chr17	90991895	90993488	11.7271651624569	4.50857024732812	1.10840158868649	4.06763242975049	4.74932185075063e-05	0.00380413530871953	29	288	FFPE-ATAC in FFPE liver
peak_104506	chr9	76355490	76355709	11.7274659734389	4.50859363925901	1.10873932170545	4.06641448625087	4.77419923056204e-05	0.00380413530871953	3.5	38.5	FFPE-ATAC in FFPE liver
peak_74901	chr4	146797775	146798074	11.726563540493	4.50852338890485	1.10873338344363	4.06637290463985	4.77505074231016e-05	0.00380413530871953	6	53	FFPE-ATAC in FFPE liver
peak_27621	chr13	65883457	65884056	11.726262729511	4.50849963210641	1.10940733127474	4.06388123190608	4.82633907808067e-05	0.00382948712536144	11.5	108.5	FFPE-ATAC in FFPE liver
peak_6838	chr1	186017795	186018158	7.23948617723113	6.31732050823213	1.5553541504657	4.06166049471151	4.87249027818919e-05	0.00382948712536144	1	42	FFPE-ATAC in FFPE liver
peak_10476	chr10	75774538	75775428	7.23948617723113	6.31732050823213	1.5553541504657	4.06166049471151	4.87249027818919e-05	0.00382948712536144	1.5	104	FFPE-ATAC in FFPE liver
peak_20673	chr12	22809260	22809555	7.23948617723113	6.31732050823213	1.5553541504657	4.06166049471151	4.87249027818919e-05	0.00382948712536144	2	33.5	FFPE-ATAC in FFPE liver
peak_34289	chr15	4363739	4364083	7.23948617723113	6.31732050823213	1.5553541504657	4.06166049471151	4.87249027818919e-05	0.00382948712536144	1	38.5	FFPE-ATAC in FFPE liver
peak_70953	chr4	72963452	72963652	7.23948617723113	6.31732050823213	1.5553541504657	4.06166049471151	4.87249027818919e-05	0.00382948712536144	1	23.5	FFPE-ATAC in FFPE liver
peak_75459	chr4	153761544	153761744	7.23948617723113	6.31732050823213	1.5553541504657	4.06166049471151	4.87249027818919e-05	0.00382948712536144	0	23	FFPE-ATAC in FFPE liver
peak_92986	chr7	110172599	110172873	7.23948617723113	6.31732050823213	1.5553541504657	4.06166049471151	4.87249027818919e-05	0.00382948712536144	0.5	31.5	FFPE-ATAC in FFPE liver
peak_107873	chrX	50412322	50412522	7.23948617723113	6.31732050823213	1.5553541504657	4.06166049471151	4.87249027818919e-05	0.00382948712536144	0	23.5	FFPE-ATAC in FFPE liver
peak_61806	chr2	171186087	171186287	7.23918536624916	6.31728157135988	1.55535667678297	4.06162886343617	4.87315064913777e-05	0.00382948712536144	0.5	23.5	FFPE-ATAC in FFPE liver
peak_67366	chr3	134165924	134166274	7.23918536624916	6.31728157135988	1.55535667678297	4.06162886343617	4.87315064913777e-05	0.00382948712536144	1	41	FFPE-ATAC in FFPE liver
peak_107015	chrUn_random	5482192	5483061	11.7259619185291	4.50847546455586	1.11043035997906	4.06011545347236	4.90484567025465e-05	0.00382955107731172	18	155	FFPE-ATAC in FFPE liver
peak_43368	chr17	16047705	16048075	7.2397869882131	6.31735959279727	1.55604236411537	4.05988920255957	4.90960075268623e-05	0.00382955107731172	2	43.5	FFPE-ATAC in FFPE liver
peak_88864	chr6	146750652	146750903	7.2397869882131	6.31735959279727	1.55604236411537	4.05988920255957	4.90960075268623e-05	0.00382955107731172	1	29	FFPE-ATAC in FFPE liver
peak_107719	chrX	42435159	42435510	7.2397869882131	6.31735959279727	1.55604236411537	4.05988920255957	4.90960075268623e-05	0.00382955107731172	1	39.5	FFPE-ATAC in FFPE liver
peak_23122	chr12	89385196	89385538	7.23888455526719	6.31724245386912	1.55605001860727	4.05979395156159	4.9116039358859e-05	0.00382955107731172	1.5	40	FFPE-ATAC in FFPE liver
peak_36073	chr15	59811087	59811419	7.23888455526719	6.31724245386912	1.55605001860727	4.05979395156159	4.9116039358859e-05	0.00382955107731172	0.5	39	FFPE-ATAC in FFPE liver
peak_68230	chr3	154509268	154509981	7.23888455526719	6.31724245386912	1.55605001860727	4.05979395156159	4.9116039358859e-05	0.00382955107731172	3.5	82	FFPE-ATAC in FFPE liver
peak_104204	chr9	70804020	70804332	7.23888455526719	6.31724245386912	1.55605001860727	4.05979395156159	4.9116039358859e-05	0.00382955107731172	1	36	FFPE-ATAC in FFPE liver
peak_107530	chrX	31532938	31533191	7.23888455526719	6.31724245386912	1.55605001860727	4.05979395156159	4.9116039358859e-05	0.00382955107731172	1	29	FFPE-ATAC in FFPE liver
peak_109645	chrY_random	21009570	21009885	7.23888455526719	6.31724245386912	1.55605001860727	4.05979395156159	4.9116039358859e-05	0.00382955107731172	1.5	36.5	FFPE-ATAC in FFPE liver
peak_50645	chr19	3509956	3510237	7.24008779919507	6.31739915442428	1.5574369089823	4.05627933818029	4.98606235939376e-05	0.00385922815274124	1	33	FFPE-ATAC in FFPE liver
peak_24471	chr12	117513956	117514158	7.23828293330325	6.3171623731165	1.5595886466448	4.0505311363396	5.11015091009323e-05	0.00392031779916803	0.5	23.5	FFPE-ATAC in FFPE liver
peak_27847	chr13	71383761	71383965	7.23828293330325	6.3171623731165	1.5595886466448	4.0505311363396	5.11015091009323e-05	0.00392031779916803	1	23	FFPE-ATAC in FFPE liver
peak_2660	chr1	85093511	85093781	11.2274130731621	3.82357969177081	0.945082114854593	4.04576452318018	5.21526373297527e-05	0.00399623400383807	6	46	FFPE-ATAC in FFPE liver
peak_108005	chrX	66770633	66770851	11.2223855301927	3.82453597461121	0.945330282476212	4.04571401710857	5.21638838004751e-05	0.00399623400383807	5	37	FFPE-ATAC in FFPE liver
peak_20552	chr12	18136483	18136794	11.2277138841441	3.82360337586239	0.9453083142565	4.04482148120079	5.23630093645104e-05	0.00400869144424359	5.5	52	FFPE-ATAC in FFPE liver
peak_65749	chr3	98447733	98448483	11.6076132939169	-3.4094270659385	0.843446276815878	-4.04225753276135	5.29390429499543e-05	0.00404714559476945	251	12	FFPE-ATAC in frozen liver
peak_2370	chr1	75510277	75510495	11.2232879631386	3.82462225612998	0.947375190207603	4.03707242459228	5.41223643380977e-05	0.0041220978676772	5	36	FFPE-ATAC in FFPE liver
peak_27601	chr13	65551549	65552211	11.2214830972468	3.82447108755633	0.947360522644718	4.03697536063639	5.41447529644522e-05	0.0041220978676772	15	108.5	FFPE-ATAC in FFPE liver
peak_106720	chr9	122759693	122759925	11.5975582079781	-3.40860684904322	0.844762141497277	-4.03499006596309	5.46046077878193e-05	0.00414560750176666	79	3	FFPE-ATAC in frozen liver
peak_98871	chr8	95745718	95746366	12.1013627336169	-3.12050020700215	0.773787620357106	-4.03276057267759	5.51254367268477e-05	0.00417936848709259	222.5	14	FFPE-ATAC in frozen liver
peak_3224	chr1	95186237	95186612	11.471680650362	3.40901782905743	0.845461307167207	4.03213937782635	5.5271389423413e-05	0.004184654070546	11	62.5	FFPE-ATAC in FFPE liver
peak_98618	chr8	91458579	91458979	11.471981461344	3.40904239086579	0.84570598990958	4.03100182751487	5.55396117910129e-05	0.00419687108160069	11.5	66.5	FFPE-ATAC in FFPE liver
peak_72302	chr4	107290118	107290732	11.4713798393801	3.40899317551231	0.845700731000257	4.03096869915237	5.55474415569707e-05	0.00419687108160069	19.5	102	FFPE-ATAC in FFPE liver
peak_106921	chrUn_random	4233395	4234390	11.477081677993	4.47611284537468	1.11086750939643	4.0293849694161	5.59229724720529e-05	0.00421653835230388	18	175	FFPE-ATAC in FFPE liver
peak_4505	chr1	137092375	137093013	11.472282272326	3.40906702906298	0.846438270871118	4.02754358632025	5.63626212206822e-05	0.00423344321678005	20.5	106.5	FFPE-ATAC in FFPE liver
peak_106919	chrUn_random	4078127	4078355	11.472282272326	3.40906702906298	0.846438270871118	4.02754358632025	5.63626212206822e-05	0.00423344321678005	6	38.5	FFPE-ATAC in FFPE liver
peak_54175	chr1_random	1139194	1139394	11.4710790283981	3.40896826095691	0.84642771777046	4.02747711279627	5.63785535104657e-05	0.00423344321678005	6	34	FFPE-ATAC in FFPE liver
peak_49141	chr18	56088086	56088465	11.4770090043134	3.40813066006942	0.846716122081913	4.02511605860235	5.69472226864946e-05	0.00425943454865689	12	63.5	FFPE-ATAC in FFPE liver
peak_19313	chr11	114890490	114890839	11.9657309010439	3.12146219540928	0.775822245901441	4.02342445308771	5.73579886241761e-05	0.00426656575392789	12.5	60	FFPE-ATAC in FFPE liver
peak_77492	chr5	63468880	63469261	11.9657309010439	3.12146219540928	0.775822245901441	4.02342445308771	5.73579886241761e-05	0.00426656575392789	13	64.5	FFPE-ATAC in FFPE liver
peak_38849	chr16	7898916	7899276	11.965430090062	3.12143848569857	0.775819443454053	4.02340842580782	5.73618938525641e-05	0.00426656575392789	14	61	FFPE-ATAC in FFPE liver
peak_85178	chr6	81631351	81631728	11.965430090062	3.12143848569857	0.775819443454053	4.02340842580782	5.73618938525641e-05	0.00426656575392789	14.5	63	FFPE-ATAC in FFPE liver
peak_95310	chr8	8488355	8489155	11.9704576330314	3.12060729690959	0.775673683269777	4.02309291164163	5.74388237511622e-05	0.00426656575392789	32.5	134.5	FFPE-ATAC in FFPE liver
peak_86228	chr6	98538909	98539464	12.1060894656043	-3.12094397452813	0.775805122384088	-4.02284527967193	5.7499270781119e-05	0.00426695739157145	189.5	11	FFPE-ATAC in frozen liver
peak_54499	chr2	7761903	7762263	11.9660317120259	3.12148786547875	0.776316096146167	4.02089803493013	5.79766977528704e-05	0.00428467370146501	12.5	60.5	FFPE-ATAC in FFPE liver
peak_13735	chr11	7073781	7074038	11.96512927908	3.12141657338563	0.776307668068624	4.02084985344973	5.79885583888169e-05	0.00428467370146501	11	44.5	FFPE-ATAC in FFPE liver
peak_108160	chrX	73003366	73004515	11.9710592549953	3.12065266285037	0.776169951552601	4.02057907112742	5.80552585145829e-05	0.00428605536986511	42.5	194	FFPE-ATAC in FFPE liver
peak_86740	chr6	114580189	114580398	11.9663325230079	3.12151567944988	0.77730792980327	4.01580320972657	5.92436760924206e-05	0.00433299800473153	8.5	35.5	FFPE-ATAC in FFPE liver
peak_20592	chr12	20334262	20334466	6.98970350374911	6.26667491645762	1.56310898597693	4.00910939203706	6.09481793115639e-05	0.00442023131861637	0.5	23	FFPE-ATAC in FFPE liver
peak_68926	chr4	23908182	23908399	6.98970350374911	6.26667491645762	1.56310898597693	4.00910939203706	6.09481793115639e-05	0.00442023131861637	1	23.5	FFPE-ATAC in FFPE liver
peak_80040	chr5	118115884	118116150	6.98970350374911	6.26667491645762	1.56310898597693	4.00910939203706	6.09481793115639e-05	0.00442023131861637	0.5	29	FFPE-ATAC in FFPE liver
peak_405	chr1	20712160	20712409	6.99000431473108	6.26671589619897	1.56348572864778	4.00816955433222	6.1191182964014e-05	0.00442023131861637	1	27.5	FFPE-ATAC in FFPE liver
peak_76783	chr5	35601951	35602285	6.99000431473108	6.26671589619897	1.56348572864778	4.00816955433222	6.1191182964014e-05	0.00442023131861637	0	38	FFPE-ATAC in FFPE liver
peak_28042	chr13	77079481	77079973	6.98940269276714	6.26663391791332	1.56349259414623	4.00809952114633	6.12093273628135e-05	0.00442023131861637	2.5	55.5	FFPE-ATAC in FFPE liver
peak_47269	chr18	6621231	6621962	6.98940269276714	6.26663391791332	1.56349259414623	4.00809952114633	6.12093273628135e-05	0.00442023131861637	4	80.5	FFPE-ATAC in FFPE liver
peak_50989	chr19	6633925	6634766	6.98940269276714	6.26663391791332	1.56349259414623	4.00809952114633	6.12093273628135e-05	0.00442023131861637	3.5	92	FFPE-ATAC in FFPE liver
peak_78233	chr5	83818933	83819188	6.98940269276714	6.26663391791332	1.56349259414623	4.00809952114633	6.12093273628135e-05	0.00442023131861637	0	28	FFPE-ATAC in FFPE liver
peak_107615	chrX	35333342	35333542	6.98940269276714	6.26663391791332	1.56349259414623	4.00809952114633	6.12093273628135e-05	0.00442023131861637	0.5	22.5	FFPE-ATAC in FFPE liver
peak_54155	chr1_random	809979	810185	11.9645276571161	3.12137759777986	0.778791735481356	4.00797473261655	6.12416705587988e-05	0.00442023131861637	7	34.5	FFPE-ATAC in FFPE liver
peak_51421	chr19	12780420	12780919	11.113863854217	-3.79069268081457	0.946209559563474	-4.00618725788754	6.17067350172907e-05	0.00444211611602176	163.5	7.5	FFPE-ATAC in frozen liver
peak_101039	chr8_random	49890	50197	6.99030512571305	6.26675720175855	1.56463154638797	4.00526067381531	6.19491271996394e-05	0.00444764139290532	2	35	FFPE-ATAC in FFPE liver
peak_8747	chr10	33613818	33614165	6.98910188178517	6.2665925575749	1.56464546958608	4.00511980470099	6.19860570694851e-05	0.00444764139290532	0.5	39	FFPE-ATAC in FFPE liver
peak_34772	chr15	22954919	22955119	6.98910188178517	6.2665925575749	1.56464546958608	4.00511980470099	6.19860570694851e-05	0.00444764139290532	0.5	22.5	FFPE-ATAC in FFPE liver
peak_89298	chr7	15031691	15032251	11.1038087682782	-3.78984219024255	0.947032899627848	-4.00180626431439	6.2860760740097e-05	0.00449571151453328	183	7	FFPE-ATAC in frozen liver
peak_631	chr1	31064621	31064821	6.9888010708032	6.26655049503314	1.56659470840575	4.00010957614579	6.33131608922625e-05	0.00449584871663226	0.5	22.5	FFPE-ATAC in FFPE liver
peak_13711	chr11	6599738	6600284	6.9888010708032	6.26655049503314	1.56659470840575	4.00010957614579	6.33131608922625e-05	0.00449584871663226	3.5	61	FFPE-ATAC in FFPE liver
peak_55827	chr2	33409413	33409631	6.9888010708032	6.26655049503314	1.56659470840575	4.00010957614579	6.33131608922625e-05	0.00449584871663226	0.5	24.5	FFPE-ATAC in FFPE liver
peak_68088	chr3	151792056	151792632	6.9888010708032	6.26655049503314	1.56659470840575	4.00010957614579	6.33131608922625e-05	0.00449584871663226	2.5	64.5	FFPE-ATAC in FFPE liver
peak_80085	chr5	118921179	118921550	6.9888010708032	6.26655049503314	1.56659470840575	4.00010957614579	6.33131608922625e-05	0.00449584871663226	1.5	41.5	FFPE-ATAC in FFPE liver
peak_81557	chr5	140128238	140129090	6.9888010708032	6.26655049503314	1.56659470840575	4.00010957614579	6.33131608922625e-05	0.00449584871663226	2.5	94	FFPE-ATAC in FFPE liver
peak_86736	chr6	114508758	114508987	11.9692543891035	3.1204889469298	0.780672771824201	3.99717917615871	6.4101781279114e-05	0.00454010171006608	7.5	39.5	FFPE-ATAC in FFPE liver
peak_80348	chr5	122458255	122458632	10.9776303996801	3.78878821557057	0.948090214208101	3.99623174967076	6.43587325749029e-05	0.00454713237882093	8	61.5	FFPE-ATAC in FFPE liver
peak_103621	chr9	63323818	63324295	10.9726028567107	3.78977024638717	0.948342935397981	3.9962023282187	6.43667275456384e-05	0.00454713237882093	11	78	FFPE-ATAC in FFPE liver
peak_9805	chr10	61686449	61686894	10.9773295886981	3.78875991689611	0.948558763568499	3.99422794075795	6.49054000856573e-05	0.00456515838365517	9.5	71	FFPE-ATAC in FFPE liver
peak_102544	chr9	45518634	45519528	10.9723020457287	3.7897470256817	0.948812473685154	3.99420025641364	6.49129834569344e-05	0.00456515838365517	21	143.5	FFPE-ATAC in FFPE liver
peak_10812	chr10	79824494	79825632	10.9720012347468	3.78972604792727	0.949760940695908	3.99018941034832	6.60205511604188e-05	0.00460563797860639	30.5	183.5	FFPE-ATAC in FFPE liver
peak_38844	chr16	7376212	7376565	11.2272990045109	4.44293273608744	1.11351959902806	3.98999060273879	6.60759131024956e-05	0.00460563797860639	5.5	60	FFPE-ATAC in FFPE liver
peak_11613	chr10	93037080	93037557	11.226998193529	4.44290773867528	1.11426272066382	3.98730717296945	6.68274794141164e-05	0.00463821116915368	9	81.5	FFPE-ATAC in FFPE liver
peak_72565	chr4	114971484	114973470	11.3583181737476	-3.3752655397382	0.846718507574189	-3.98629002383352	6.7114467890963e-05	0.00465144785324357	650	26	FFPE-ATAC in frozen liver
peak_43195	chr17	13555434	13555636	10.9767279667342	3.78869428365418	0.950943511268693	3.98414231629756	6.77242789167591e-05	0.00467599941117027	5	33	FFPE-ATAC in FFPE liver
peak_43190	chr17	13413778	13414064	11.226697382547	4.44288229295317	1.11539130427768	3.98324989258399	6.79792086951869e-05	0.00468476177637559	4.5	50	FFPE-ATAC in FFPE liver
peak_24486	chr12	118016417	118016994	11.222198787862	3.37426455863204	0.848731761195241	3.97565486871868	7.01858514344496e-05	0.00477424379167448	16.5	92.5	FFPE-ATAC in FFPE liver
peak_42799	chr17	5464090	5464414	11.222198787862	3.37426455863204	0.848731761195241	3.97565486871868	7.01858514344496e-05	0.00477424379167448	10	53	FFPE-ATAC in FFPE liver
peak_27644	chr13	66518510	66519007	11.22189797688	3.37423932497648	0.848729083208936	3.9756376819549	7.01909208311331e-05	0.00477424379167448	12.5	81	FFPE-ATAC in FFPE liver
peak_67872	chr3	146222862	146223468	11.22189797688	3.37423932497648	0.848729083208936	3.9756376819549	7.01909208311331e-05	0.00477424379167448	21	97	FFPE-ATAC in FFPE liver
peak_22901	chr12	85726983	85727331	11.8573959673989	-3.08747599038658	0.776794229363053	-3.97463816501085	7.04863342790369e-05	0.00479136858420245	117	6.5	FFPE-ATAC in frozen liver
peak_25406	chr13	24227132	24227605	11.2224995988439	3.37428978459754	0.849243566512234	3.97328860371053	7.08870721057142e-05	0.00480181546744766	14.5	76.5	FFPE-ATAC in FFPE liver
peak_20342	chr12	12377309	12378066	11.221597165898	3.37421390670005	0.849235514318831	3.9732369287529	7.09024591936005e-05	0.00480181546744766	23	122.5	FFPE-ATAC in FFPE liver
peak_53653	chr19	54268602	54268910	11.221597165898	3.37421390670005	0.849235514318831	3.9732369287529	7.09024591936005e-05	0.00480181546744766	11	50	FFPE-ATAC in FFPE liver
peak_70120	chr4	56703561	56704329	11.221597165898	3.37421390670005	0.849235514318831	3.9732369287529	7.09024591936005e-05	0.00480181546744766	24	128	FFPE-ATAC in FFPE liver
peak_76905	chr5	37699985	37700334	11.221597165898	3.37421390670005	0.849235514318831	3.9732369287529	7.09024591936005e-05	0.00480181546744766	11	56	FFPE-ATAC in FFPE liver
peak_109490	chrX	166511927	166512153	11.226095760583	4.44282944059152	1.11887796614733	3.97079000124533	7.16347008328484e-05	0.00484542765996977	2	39	FFPE-ATAC in FFPE liver
peak_27606	chr13	65632694	65633152	11.2171712448926	3.37519722646396	0.850182232901116	3.96996913820066	7.18819418545667e-05	0.00485019757758831	17.5	73	FFPE-ATAC in FFPE liver
peak_43191	chr17	13423242	13423442	11.2272263308314	3.37333103039855	0.849794435260251	3.96958474947587	7.19979956537874e-05	0.00485504420200764	5	32	FFPE-ATAC in FFPE liver
peak_74893	chr4	146710091	146710395	11.2275271418134	3.3733516111965	0.850316530523372	3.96717162386599	7.27306198723806e-05	0.00489542622943581	9.5	49.5	FFPE-ATAC in FFPE liver
peak_45920	chr17	68264255	68264632	11.7159482275619	3.08751248335751	0.779038995326038	3.9632322667819	7.39417788645555e-05	0.00495668240941533	17.5	63.5	FFPE-ATAC in FFPE liver
peak_48012	chr18	29421297	29421640	11.7209757705313	3.08666132540429	0.778890955397625	3.96289275669987	7.4047049593656e-05	0.00495668240941533	13.5	56.5	FFPE-ATAC in FFPE liver
peak_102504	chr9	44866350	44866910	11.7209757705313	3.08666132540429	0.778890955397625	3.96289275669987	7.4047049593656e-05	0.00495668240941533	20	93.5	FFPE-ATAC in FFPE liver
peak_88544	chr6	142668343	142668700	11.7162490385439	3.08753780710997	0.779298746865356	3.96194375973176	7.43420541658685e-05	0.00497212842911381	15	59	FFPE-ATAC in FFPE liver
peak_24765	chr13	8450215	8450823	11.7212765815133	3.08668455738279	0.779150511487904	3.961602427095	7.44484321300607e-05	0.00497212842911381	25	101	FFPE-ATAC in FFPE liver
peak_68673	chr4	11629389	11629660	11.7212765815133	3.08668455738279	0.779150511487904	3.961602427095	7.44484321300607e-05	0.00497212842911381	11	45	FFPE-ATAC in FFPE liver
peak_55528	chr2	30327335	30327820	11.7206749595494	3.08663592091402	0.779144873631487	3.96156867018534	7.44589604527477e-05	0.00497212842911381	19	79.5	FFPE-ATAC in FFPE liver
peak_94043	chr7	133768516	133769550	11.715346605598	3.08746755425803	0.780064769547134	3.95796307536163	7.55916395976616e-05	0.00502636328689939	45	171.5	FFPE-ATAC in FFPE liver
peak_48078	chr18	32153845	32154056	11.7215773924953	3.08670577475233	0.779927278067307	3.95768408357419	7.56799592438468e-05	0.00502918983398835	8.5	35	FFPE-ATAC in FFPE liver
peak_6336	chr1	176500195	176500511	6.74022164124905	6.21422899589144	1.57212315551433	3.95276220828795	7.72542002477348e-05	0.00503705271727799	1	34	FFPE-ATAC in FFPE liver
peak_36317	chr15	67364359	67364559	6.74022164124905	6.21422899589144	1.57212315551433	3.95276220828795	7.72542002477348e-05	0.00503705271727799	0	21.5	FFPE-ATAC in FFPE liver
peak_57403	chr2	74022501	74022708	6.74022164124905	6.21422899589144	1.57212315551433	3.95276220828795	7.72542002477348e-05	0.00503705271727799	1	22.5	FFPE-ATAC in FFPE liver
peak_73215	chr4	125124001	125124325	6.74022164124905	6.21422899589144	1.57212315551433	3.95276220828795	7.72542002477348e-05	0.00503705271727799	1.5	34.5	FFPE-ATAC in FFPE liver
peak_98564	chr8	90421797	90422096	6.74022164124905	6.21422899589144	1.57212315551433	3.95276220828795	7.72542002477348e-05	0.00503705271727799	1.5	31.5	FFPE-ATAC in FFPE liver
peak_109673	chrY_random	27821159	27821500	6.74022164124905	6.21422899589144	1.57212315551433	3.95276220828795	7.72542002477348e-05	0.00503705271727799	0	37	FFPE-ATAC in FFPE liver
peak_16083	chr11	68109260	68109557	6.73992083026708	6.21418585028038	1.57212742116331	3.95272403917625	7.72665285968987e-05	0.00503705271727799	1.5	31	FFPE-ATAC in FFPE liver
peak_21197	chr12	39686236	39686494	6.73992083026708	6.21418585028038	1.57212742116331	3.95272403917625	7.72665285968987e-05	0.00503705271727799	0.5	28	FFPE-ATAC in FFPE liver
peak_50217	chr18	76514064	76514328	6.73992083026708	6.21418585028038	1.57212742116331	3.95272403917625	7.72665285968987e-05	0.00503705271727799	1.5	28	FFPE-ATAC in FFPE liver
peak_51509	chr19	17451946	17452151	6.73992083026708	6.21418585028038	1.57212742116331	3.95272403917625	7.72665285968987e-05	0.00503705271727799	1	21.5	FFPE-ATAC in FFPE liver
peak_79626	chr5	112548722	112548994	6.73992083026708	6.21418585028038	1.57212742116331	3.95272403917625	7.72665285968987e-05	0.00503705271727799	0.5	29.5	FFPE-ATAC in FFPE liver
peak_81556	chr5	140127572	140128167	6.73992083026708	6.21418585028038	1.57212742116331	3.95272403917625	7.72665285968987e-05	0.00503705271727799	3	65.5	FFPE-ATAC in FFPE liver
peak_82142	chr5	148019446	148019847	6.73992083026708	6.21418585028038	1.57212742116331	3.95272403917625	7.72665285968987e-05	0.00503705271727799	1	43.5	FFPE-ATAC in FFPE liver
peak_82358	chr5	151799368	151799604	6.73992083026708	6.21418585028038	1.57212742116331	3.95272403917625	7.72665285968987e-05	0.00503705271727799	0.5	25.5	FFPE-ATAC in FFPE liver
peak_95349	chr8	10116595	10116888	6.73992083026708	6.21418585028038	1.57212742116331	3.95272403917625	7.72665285968987e-05	0.00503705271727799	2	31	FFPE-ATAC in FFPE liver
peak_20553	chr12	18140392	18141000	10.9784187639748	4.40904735076121	1.11578329340167	3.95152658839284	7.76542425295979e-05	0.00504085730682531	9	103	FFPE-ATAC in FFPE liver
peak_93367	chr7	120316254	120316752	10.9784187639748	4.40904735076121	1.11578329340167	3.95152658839284	7.76542425295979e-05	0.00504085730682531	5.5	83	FFPE-ATAC in FFPE liver
peak_27605	chr13	65631445	65632056	10.9778171420109	4.40899688956106	1.11577908346388	3.95149627278685	7.76640820332006e-05	0.00504085730682531	12.5	102	FFPE-ATAC in FFPE liver
peak_7146	chr1	192126413	192126676	6.74052245223102	6.21427230059833	1.57296372083907	3.95067744937146	7.79302929974686e-05	0.00504085730682531	0.5	27.5	FFPE-ATAC in FFPE liver
peak_42701	chr17	4072344	4072552	6.74052245223102	6.21427230059833	1.57296372083907	3.95067744937146	7.79302929974686e-05	0.00504085730682531	1	22.5	FFPE-ATAC in FFPE liver
peak_70910	chr4	71396640	71396840	6.74052245223102	6.21427230059833	1.57296372083907	3.95067744937146	7.79302929974686e-05	0.00504085730682531	0.5	21.5	FFPE-ATAC in FFPE liver
peak_28178	chr13	88908694	88908894	6.73962001928511	6.21414250435531	1.57297663352034	3.95056250164887	7.79677330957942e-05	0.00504085730682531	1	22	FFPE-ATAC in FFPE liver
peak_46101	chr17	73216160	73216624	6.73962001928511	6.21414250435531	1.57297663352034	3.95056250164887	7.79677330957942e-05	0.00504085730682531	2	50.5	FFPE-ATAC in FFPE liver
peak_108148	chrX	72900627	72900880	6.73962001928511	6.21414250435531	1.57297663352034	3.95056250164887	7.79677330957942e-05	0.00504085730682531	0.5	26.5	FFPE-ATAC in FFPE liver
peak_97524	chr8	71246500	71246848	10.9828446849803	4.407963334387	1.11661842574795	3.94760039127456	7.89384204026429e-05	0.00506618740689249	5.5	57	FFPE-ATAC in FFPE liver
peak_17062	chr11	81084620	81084857	6.74082326321299	6.21431612623993	1.57466929937471	3.9464261662481	7.93263684800561e-05	0.00506618740689249	0.5	25	FFPE-ATAC in FFPE liver
peak_15123	chr11	51350839	51351420	10.7281485371801	3.75316432561308	0.951046924359562	3.94635031088553	7.93514919450077e-05	0.00506618740689249	15.5	93	FFPE-ATAC in FFPE liver
peak_58132	chr2	94396761	94398000	10.7281485371801	3.75316432561308	0.951046924359562	3.94635031088553	7.93514919450077e-05	0.00506618740689249	25.5	197	FFPE-ATAC in FFPE liver
peak_29585	chr13	117538097	117538301	6.73931920830314	6.21409859984315	1.57469120925723	3.94623311752297	7.93903214358025e-05	0.00506618740689249	0.5	22.5	FFPE-ATAC in FFPE liver
peak_37854	chr15	93502422	93502897	6.73931920830314	6.21409859984315	1.57469120925723	3.94623311752297	7.93903214358025e-05	0.00506618740689249	2.5	49.5	FFPE-ATAC in FFPE liver
peak_37858	chr15	93843429	93843634	6.73931920830314	6.21409859984315	1.57469120925723	3.94623311752297	7.93903214358025e-05	0.00506618740689249	0.5	22	FFPE-ATAC in FFPE liver
peak_41496	chr16	66896874	66897191	6.73931920830314	6.21409859984315	1.57469120925723	3.94623311752297	7.93903214358025e-05	0.00506618740689249	0.5	33	FFPE-ATAC in FFPE liver
peak_80171	chr5	120548936	120549276	6.73931920830314	6.21409859984315	1.57469120925723	3.94623311752297	7.93903214358025e-05	0.00506618740689249	1	37	FFPE-ATAC in FFPE liver
peak_80788	chr5	126203338	126203538	6.73931920830314	6.21409859984315	1.57469120925723	3.94623311752297	7.93903214358025e-05	0.00506618740689249	0.5	21.5	FFPE-ATAC in FFPE liver
peak_78870	chr5	97607427	97607663	10.7234218051926	3.75419876529199	0.951553690713238	3.94533571981422	7.96882507376481e-05	0.00506618740689249	6	37.5	FFPE-ATAC in FFPE liver
peak_104829	chr9	85190514	85191349	10.7234218051926	3.75419876529199	0.951553690713238	3.94533571981422	7.96882507376481e-05	0.00506618740689249	19.5	132	FFPE-ATAC in FFPE liver
peak_29706	chr14	4955516	4955909	10.7278477261981	3.75313666960991	0.951291420292182	3.94530696855982	7.96978133894147e-05	0.00506618740689249	9	62.5	FFPE-ATAC in FFPE liver
peak_91172	chr7	67050089	67050407	10.7275469152161	3.75310605277258	0.952033788343777	3.94219837438935	8.07381536236049e-05	0.00510636809262473	8.5	51.5	FFPE-ATAC in FFPE liver
peak_72954	chr4	119892900	119893311	10.7225193722467	3.75412355251563	0.952292413026955	3.94219622162355	8.07388785084975e-05	0.00510636809262473	10	66.5	FFPE-ATAC in FFPE liver
peak_106109	chr9	112889464	112890197	10.7225193722467	3.75412355251563	0.952292413026955	3.94219622162355	8.07388785084975e-05	0.00510636809262473	23	117	FFPE-ATAC in FFPE liver
peak_3762	chr1	122356010	122356210	6.73901839732117	6.21405378540557	1.57731335706732	3.93964443245398	8.16024626921409e-05	0.00511908568960338	1	21	FFPE-ATAC in FFPE liver
peak_81698	chr5	142440834	142441264	6.73901839732117	6.21405378540557	1.57731335706732	3.93964443245398	8.16024626921409e-05	0.00511908568960338	2.5	47	FFPE-ATAC in FFPE liver
peak_83212	chr6	29275006	29275208	6.73901839732117	6.21405378540557	1.57731335706732	3.93964443245398	8.16024626921409e-05	0.00511908568960338	1	22	FFPE-ATAC in FFPE liver
peak_87078	chr6	119403673	119403963	10.976613898083	4.40889199317441	1.12056712017484	3.93451843606342	8.33636701258751e-05	0.00520065195304524	6	49.5	FFPE-ATAC in FFPE liver
peak_86229	chr6	98540309	98541370	11.1190781395171	-3.34113263560122	0.849808261370442	-3.93163115431844	8.43714459686443e-05	0.00523199694775885	337	17.5	FFPE-ATAC in frozen liver
peak_21696	chr12	58796762	58797114	14.4778831791856	5.84933939631673	1.48859924602605	3.92942520421937	8.5149156627333e-05	0.00525450228426377	2	79.5	FFPE-ATAC in FFPE liver
peak_73593	chr4	131192069	131192434	10.9724161143799	3.33862757889571	0.851959229053399	3.91876449604896	8.90040246112896e-05	0.0054072777121483	13	58	FFPE-ATAC in FFPE liver
peak_3000	chr1	91102853	91103190	10.9727169253619	3.338653457658	0.852228858686625	3.91755503656989	8.94516271513183e-05	0.0054248183567536	10.5	54.5	FFPE-ATAC in FFPE liver
peak_106734	chr9	122952182	122952546	10.9727169253619	3.338653457658	0.852228858686625	3.91755503656989	8.94516271513183e-05	0.0054248183567536	10	57.5	FFPE-ATAC in FFPE liver
peak_2159	chr1	72599688	72600196	10.972115303398	3.33860159962646	0.852223350484505	3.9175195067448	8.94648082947045e-05	0.0054248183567536	15	80	FFPE-ATAC in FFPE liver
peak_69809	chr4	48796587	48796799	10.971814492416	3.33857533367965	0.853025253045245	3.9138059767412	9.08526470930604e-05	0.00548920993424505	6.5	33.5	FFPE-ATAC in FFPE liver
peak_97137	chr8	54534187	54534460	10.971814492416	3.33857533367965	0.853025253045245	3.9138059767412	9.08526470930604e-05	0.00548920993424505	9	44	FFPE-ATAC in FFPE liver
peak_72575	chr4	115084128	115086137	11.6078000362477	-3.05336719778494	0.780262462541918	-3.91325655707922	9.10596976870822e-05	0.00549869343882595	648	36	FFPE-ATAC in frozen liver
peak_42527	chr16	96335582	96335985	10.7286360904928	4.3742693992106	1.11817414951688	3.91197507213035	9.15443629387336e-05	0.00551617814100901	8.5	65	FFPE-ATAC in FFPE liver
peak_106879	chrUn_random	3580818	3581422	10.7286360904928	4.3742693992106	1.11817414951688	3.91197507213035	9.15443629387336e-05	0.00551617814100901	6	98	FFPE-ATAC in FFPE liver
peak_89184	chr7	6867265	6867468	10.7283352795108	4.37424353030948	1.11817196494166	3.91195957997184	9.15502370439185e-05	0.00551617814100901	4	33	FFPE-ATAC in FFPE liver
peak_30443	chr14	25361121	25361439	10.7280344685289	4.37421751527061	1.11857844056205	3.91051477183191	9.20996272041346e-05	0.00553712441078702	6.5	52	FFPE-ATAC in FFPE liver
peak_47656	chr18	13454931	13455502	10.7280344685289	4.37421751527061	1.11857844056205	3.91051477183191	9.20996272041346e-05	0.00553712441078702	6	94.5	FFPE-ATAC in FFPE liver
peak_54159	chr1_random	867756	867956	10.7277336575469	4.37419118051877	1.1193995626509	3.90762273495987	9.32086959523461e-05	0.00559861546499836	4	33	FFPE-ATAC in FFPE liver
peak_27623	chr13	65968510	65968993	10.971513681434	3.33854859490158	0.854377106761334	3.90758198982758	9.32244110548911e-05	0.00559861546499836	16	77	FFPE-ATAC in FFPE liver
peak_27655	chr13	66740539	66741072	10.7274328465649	4.37416435398777	1.12064738879307	3.90324770996766	9.49104770157467e-05	0.0056453407156041	4.5	86.5	FFPE-ATAC in FFPE liver
peak_34658	chr15	12004527	12005364	11.4661655540799	3.05274483867981	0.782503295970639	3.90125492684744	9.56953101269877e-05	0.00568173436508969	30.5	136.5	FFPE-ATAC in FFPE liver
peak_7718	chr10	7913289	7913595	11.4711930970493	3.05187209176699	0.782353178382338	3.900887957121	9.58405031664694e-05	0.00568727906925307	12	49.5	FFPE-ATAC in FFPE liver
peak_83613	chr6	36555732	36556244	11.4667671760438	3.05279690362362	0.783049110890048	3.89860209425904	9.67496078392315e-05	0.00572047105836125	19	82	FFPE-ATAC in FFPE liver
peak_101046	chr8_random	113681	114014	11.4658647430979	3.05272183667147	0.783040534985024	3.89854892598868	9.67708498363973e-05	0.00572047105836125	13	55	FFPE-ATAC in FFPE liver
peak_3144	chr1	93615437	93615867	11.4717947190132	3.05191978091977	0.782898597424865	3.89823125364925	9.68978593269282e-05	0.00572218606496477	14.5	70	FFPE-ATAC in FFPE liver
peak_40098	chr16	30311406	30311657	11.6234842871198	-3.05451632125846	0.783620787200555	-3.89795213596945	9.70095840511163e-05	0.0057241933048085	80.5	5.5	FFPE-ATAC in frozen liver
peak_76465	chr5	30833494	30833743	10.7298393344207	4.3743748491286	1.12236023000261	3.89747848524391	9.71994544867525e-05	0.00573074828840504	3.5	40	FFPE-ATAC in FFPE liver
peak_109213	chrX	154160058	154160413	10.4733383207286	3.71764414544162	0.954362564198725	3.89542117943711	9.80282374575628e-05	0.00577031524736124	7	54	FFPE-ATAC in FFPE liver
peak_80025	chr5	117879452	117879670	10.4739399426926	3.71770092363493	0.954889595490234	3.89333064387018	9.88772383178243e-05	0.0057767673552878	5.5	33.5	FFPE-ATAC in FFPE liver
peak_53612	chr19	53840388	53840607	10.4780650527161	3.71658190181814	0.95462253586495	3.89324760540109	9.89111045294375e-05	0.0057767673552878	4.5	33.5	FFPE-ATAC in FFPE liver
peak_93754	chr7	127189253	127189872	11.4670679870258	3.05282634744327	0.784140217163355	3.89321486211604	9.89244614829528e-05	0.0057767673552878	24.5	100.5	FFPE-ATAC in FFPE liver
peak_20587	chr12	20288128	20288445	11.465563932116	3.05270064107457	0.784125856177622	3.89312585093874	9.89607803793585e-05	0.0057767673552878	14	52.5	FFPE-ATAC in FFPE liver
peak_96636	chr8	40238164	40238755	11.465563932116	3.05270064107457	0.784125856177622	3.89312585093874	9.89607803793585e-05	0.0057767673552878	19.5	96	FFPE-ATAC in FFPE liver
peak_101794	chr9	29239038	29239672	11.4720955299952	3.05194050100987	0.783988920522376	3.89283626479867	9.90790262395535e-05	0.0057767673552878	22	103	FFPE-ATAC in FFPE liver
peak_15426	chr11	55164396	55164596	6.490739778749	6.15980511432256	1.58242098115635	3.89264626017615	9.91566827259748e-05	0.0057767673552878	1	20	FFPE-ATAC in FFPE liver
peak_23901	chr12	108090329	108090529	6.490739778749	6.15980511432256	1.58242098115635	3.89264626017615	9.91566827259748e-05	0.0057767673552878	1	20.5	FFPE-ATAC in FFPE liver
peak_29747	chr14	7833095	7833345	6.490739778749	6.15980511432256	1.58242098115635	3.89264626017615	9.91566827259748e-05	0.0057767673552878	1.5	25.5	FFPE-ATAC in FFPE liver
peak_39225	chr16	14630884	14631614	6.490739778749	6.15980511432256	1.58242098115635	3.89264626017615	9.91566827259748e-05	0.0057767673552878	2	75.5	FFPE-ATAC in FFPE liver
peak_95307	chr8	8167187	8167513	6.490739778749	6.15980511432256	1.58242098115635	3.89264626017615	9.91566827259748e-05	0.0057767673552878	2	33	FFPE-ATAC in FFPE liver
peak_97949	chr8	76034484	76034784	6.490739778749	6.15980511432256	1.58242098115635	3.89264626017615	9.91566827259748e-05	0.0057767673552878	1.5	30.5	FFPE-ATAC in FFPE liver
peak_107984	chrX	58274836	58275149	6.490739778749	6.15980511432256	1.58242098115635	3.89264626017615	9.91566827259748e-05	0.0057767673552878	1	32.5	FFPE-ATAC in FFPE liver
peak_26711	chr13	48538615	48539307	6.49013815678506	6.15971397015402	1.58243095116361	3.89256413723746	9.91902648428918e-05	0.0057767673552878	3.5	72	FFPE-ATAC in FFPE liver
peak_26992	chr13	54014461	54014661	6.49013815678506	6.15971397015402	1.58243095116361	3.89256413723746	9.91902648428918e-05	0.0057767673552878	1	21	FFPE-ATAC in FFPE liver
peak_89604	chr7	20629854	20630098	6.49013815678506	6.15971397015402	1.58243095116361	3.89256413723746	9.91902648428918e-05	0.0057767673552878	0.5	25	FFPE-ATAC in FFPE liver
peak_38440	chr15	101528587	101529017	6.49104058973097	6.15985102826129	1.58383069962473	3.88921052592351	0.000100570848304234	0.0057805945623731	1	43.5	FFPE-ATAC in FFPE liver
peak_43870	chr17	27573417	27573763	6.49104058973097	6.15985102826129	1.58383069962473	3.88921052592351	0.000100570848304234	0.0057805945623731	1	35	FFPE-ATAC in FFPE liver
peak_84198	chr6	50842967	50843175	6.49104058973097	6.15985102826129	1.58383069962473	3.88921052592351	0.000100570848304234	0.0057805945623731	1	21	FFPE-ATAC in FFPE liver
peak_109216	chrX	154627281	154627481	6.49104058973097	6.15985102826129	1.58383069962473	3.88921052592351	0.000100570848304234	0.0057805945623731	0.5	21	FFPE-ATAC in FFPE liver
peak_99888	chr8	117914420	117914644	10.4742407536745	3.71773376516937	0.955943200557064	3.88907391464566	0.000100627469864571	0.0057805945623731	5	34.5	FFPE-ATAC in FFPE liver
peak_23927	chr12	109323352	109324710	6.48983734580309	6.1596679879063	1.58385090856506	3.88904533538881	0.000100639318974024	0.0057805945623731	6	140.5	FFPE-ATAC in FFPE liver
peak_27505	chr13	63873029	63873372	6.48983734580309	6.1596679879063	1.58385090856506	3.88904533538881	0.000100639318974024	0.0057805945623731	0.5	35	FFPE-ATAC in FFPE liver
peak_29679	chr14	3651397	3651831	6.48983734580309	6.1596679879063	1.58385090856506	3.88904533538881	0.000100639318974024	0.0057805945623731	1.5	45	FFPE-ATAC in FFPE liver
peak_37913	chr15	95979494	95980288	6.48983734580309	6.1596679879063	1.58385090856506	3.88904533538881	0.000100639318974024	0.0057805945623731	3	80.5	FFPE-ATAC in FFPE liver
peak_42013	chr16	89558240	89559396	6.48983734580309	6.1596679879063	1.58385090856506	3.88904533538881	0.000100639318974024	0.0057805945623731	4	118.5	FFPE-ATAC in FFPE liver
peak_107911	chrX	53621259	53621835	6.48983734580309	6.1596679879063	1.58385090856506	3.88904533538881	0.000100639318974024	0.0057805945623731	1	58	FFPE-ATAC in FFPE liver
peak_31303	chr14	43544374	43544627	10.4777642417341	3.71654873799356	0.955668249616525	3.88895282383283	0.000100677683781869	0.0057805945623731	6	39	FFPE-ATAC in FFPE liver
peak_96637	chr8	40240613	40241318	10.4777642417341	3.71654873799356	0.955668249616525	3.88895282383283	0.000100677683781869	0.0057805945623731	17.5	108.5	FFPE-ATAC in FFPE liver
peak_3337	chr1	101631713	101631929	6.49134140071294	6.15989766464706	1.5862228929868	3.88337458240071	0.000103016679408326	0.00585362939419795	0.5	22	FFPE-ATAC in FFPE liver
peak_108501	chrX	99117144	99117346	6.49134140071294	6.15989766464706	1.5862228929868	3.88337458240071	0.000103016679408326	0.00585362939419795	0	21	FFPE-ATAC in FFPE liver
peak_27747	chr13	68739533	68739830	6.48953653482112	6.15962123552185	1.58625388446629	3.88312444548831	0.000103122755744426	0.00585362939419795	0	30	FFPE-ATAC in FFPE liver
peak_40012	chr16	29009539	29009846	6.48953653482112	6.15962123552185	1.58625388446629	3.88312444548831	0.000103122755744426	0.00585362939419795	2	32	FFPE-ATAC in FFPE liver
peak_49274	chr18	60031825	60032027	6.48953653482112	6.15962123552185	1.58625388446629	3.88312444548831	0.000103122755744426	0.00585362939419795	1	21	FFPE-ATAC in FFPE liver
peak_86309	chr6	99780792	99781043	6.48953653482112	6.15962123552185	1.58625388446629	3.88312444548831	0.000103122755744426	0.00585362939419795	1.5	26	FFPE-ATAC in FFPE liver
peak_91182	chr7	67847427	67847696	6.48953653482112	6.15962123552185	1.58625388446629	3.88312444548831	0.000103122755744426	0.00585362939419795	0.5	27	FFPE-ATAC in FFPE liver
peak_101667	chr9	22414997	22415687	6.48953653482112	6.15962123552185	1.58625388446629	3.88312444548831	0.000103122755744426	0.00585362939419795	4	72.5	FFPE-ATAC in FFPE liver
peak_108637	chrX	103664460	103664679	6.48953653482112	6.15962123552185	1.58625388446629	3.88312444548831	0.000103122755744426	0.00585362939419795	0.5	23	FFPE-ATAC in FFPE liver
peak_36252	chr15	66441050	66441621	10.6198136035351	-4.34113724113894	1.11906395542222	-3.8792574991847	0.00010477579593716	0.00591686813465914	181	5.5	FFPE-ATAC in frozen liver
peak_81997	chr5	146576852	146577060	6.48923572383915	6.1595733471739	1.58970973610091	3.8746528421481	0.000106776809462305	0.00600208137203344	0.5	21.5	FFPE-ATAC in FFPE liver
peak_99774	chr8	115851932	115852143	6.48923572383915	6.1595733471739	1.58970973610091	3.8746528421481	0.000106776809462305	0.00600208137203344	0.5	21.5	FFPE-ATAC in FFPE liver
peak_46087	chr17	73044320	73044528	10.4788534170108	4.33863231197802	1.1206408883036	3.87156345735854	0.000108139495934118	0.00605388169461672	2.5	33.5	FFPE-ATAC in FFPE liver
peak_47725	chr18	16688962	16689606	10.4791542279927	4.33865884489507	1.12085763437604	3.87083846496732	0.000108461649051297	0.00606340451449445	12	102.5	FFPE-ATAC in FFPE liver
peak_20668	chr12	22375075	22375466	10.4785526060288	4.33860571690117	1.12085278920838	3.87080779802082	0.000108475295966215	0.00606340451449445	4.5	63	FFPE-ATAC in FFPE liver
peak_27603	chr13	65573617	65573973	10.4785526060288	4.33860571690117	1.12085278920838	3.87080779802082	0.000108475295966215	0.00606340451449445	7.5	57.5	FFPE-ATAC in FFPE liver
peak_58669	chr2	112758090	112758370	6.48893491285718	6.15952401503635	1.59424441007157	3.86360082313843	0.000111727746845267	0.00619235669411543	0.5	29.5	FFPE-ATAC in FFPE liver
peak_61271	chr2	164928243	164928458	6.48893491285718	6.15952401503635	1.59424441007157	3.86360082313843	0.000111727746845267	0.00619235669411543	0	22.5	FFPE-ATAC in FFPE liver
peak_48018	chr18	30161600	30161955	10.7226334408979	3.30208791307139	0.855414345109216	3.8602204089175	0.000113284795281212	0.00624009940329489	11.5	54.5	FFPE-ATAC in FFPE liver
peak_42948	chr17	8236213	8236536	10.7232350628619	3.30214111586067	0.855957070816537	3.85783496444583	0.000114395845093388	0.00625712619458438	9.5	50.5	FFPE-ATAC in FFPE liver
peak_92652	chr7	106106176	106106527	10.7232350628619	3.30214111586067	0.855957070816537	3.85783496444583	0.000114395845093388	0.00625712619458438	10.5	53.5	FFPE-ATAC in FFPE liver
peak_37812	chr15	91737158	91739511	10.722332629916	3.30206111397377	0.855948492049502	3.85778016392931	0.00011442148946062	0.00625712619458438	68	370	FFPE-ATAC in FFPE liver
peak_87651	chr6	127215961	127216486	10.7235358738438	3.30216789546898	0.857092648166183	3.85275489474123	0.000116796290531212	0.00636012577917015	19	81	FFPE-ATAC in FFPE liver
peak_109524	chrY	745929	746275	10.7282626058313	3.30115447151967	0.857151862601705	3.85130642019456	0.000117489381520248	0.00638519890726454	9.5	53.5	FFPE-ATAC in FFPE liver
peak_51610	chr19	20623927	20624149	11.3735875449866	-3.01965366364804	0.78413671638223	-3.85092752393972	0.000117671321249902	0.00638557188799615	70	5	FFPE-ATAC in frozen liver
peak_30449	chr14	25626267	25627291	13.4799557291854	5.74439091335111	1.4926765110235	3.84838300256516	0.000118900058970406	0.00643848212294134	8	213	FFPE-ATAC in FFPE liver
peak_86735	chr6	114453338	114453586	10.7270593619034	3.30103623899058	0.858296514586257	3.8460324408772	0.000120045875824379	0.00649199817432324	8	38.5	FFPE-ATAC in FFPE liver
peak_39363	chr16	17560234	17560699	10.2238564582286	3.68019391132146	0.957201415621722	3.84474348999066	0.000120678606259539	0.00650549598359072	11.5	69.5	FFPE-ATAC in FFPE liver
peak_81637	chr5	141096484	141096693	10.2238564582286	3.68019391132146	0.957201415621722	3.84474348999066	0.000120678606259539	0.00650549598359072	4.5	31.5	FFPE-ATAC in FFPE liver
peak_18218	chr11	99846924	99847630	10.228884001198	3.67913893664278	0.95694334588164	3.84467790332265	0.000120710885883761	0.00650549598359072	14	108	FFPE-ATAC in FFPE liver
peak_60154	chr2	146603955	146604206	10.2241572692105	3.68022304052997	0.957477656636447	3.84366466937551	0.000121210602164448	0.00650549598359072	7	37.5	FFPE-ATAC in FFPE liver
peak_12619	chr10	117719993	117720350	10.2235556472466	3.68016762491634	0.957471421528314	3.84363182249562	0.000121226834491774	0.00650549598359072	9	54	FFPE-ATAC in FFPE liver
peak_45412	chr17	53291708	53292092	10.2235556472466	3.68016762491634	0.957471421528314	3.84363182249562	0.000121226834491774	0.00650549598359072	10	59	FFPE-ATAC in FFPE liver
peak_69202	chr4	36780829	36781236	10.2235556472466	3.68016762491634	0.957471421528314	3.84363182249562	0.000121226834491774	0.00650549598359072	9.5	61	FFPE-ATAC in FFPE liver
peak_106840	chrUn_random	2461448	2461656	10.22918481218	3.67916509124519	0.957219044735839	3.84359788021196	0.00012124361030075	0.00650549598359072	5.5	31.5	FFPE-ATAC in FFPE liver
peak_58183	chr2	101720579	101720797	10.2232548362646	3.68014399725435	0.958292066179861	3.84031562728562	0.000122876227398667	0.00657250291513375	5	32.5	FFPE-ATAC in FFPE liver
peak_46973	chr17	88719409	88720168	10.228282379234	3.67907731466792	0.958031889082196	3.84024514903415	0.000122911510049732	0.00657250291513375	22.5	115	FFPE-ATAC in FFPE liver
peak_3412	chr1	106728484	106728838	11.2166836915798	3.01714339005001	0.785943920939044	3.83887871598413	0.000123597460975964	0.00659953933044857	13.5	56.5	FFPE-ATAC in FFPE liver
peak_12398	chr10	113353075	113353570	11.2166836915798	3.01714339005001	0.785943920939044	3.83887871598413	0.000123597460975964	0.00659953933044857	20	78	FFPE-ATAC in FFPE liver
peak_104764	chr9	83219764	83219990	11.2166836915798	3.01714339005001	0.785943920939044	3.83887871598413	0.000123597460975964	0.00659953933044857	8	35.5	FFPE-ATAC in FFPE liver
peak_3832	chr1	125843972	125844307	11.2217112345492	3.0162496075017	0.785792195971328	3.83848251861712	0.000123797026388304	0.00660377130900603	11	54	FFPE-ATAC in FFPE liver
peak_17669	chr11	93682524	93682899	11.2217112345492	3.0162496075017	0.785792195971328	3.83848251861712	0.000123797026388304	0.00660377130900603	15	59.5	FFPE-ATAC in FFPE liver
peak_12396	chr10	113140382	113140738	11.2220120455312	3.01627404719287	0.786077884386816	3.83711856942233	0.000124486375663486	0.00662324605626654	13.5	57.5	FFPE-ATAC in FFPE liver
peak_109549	chrY_random	1974862	1975212	11.2220120455312	3.01627404719287	0.786077884386816	3.83711856942233	0.000124486375663486	0.00662324605626654	12.5	55	FFPE-ATAC in FFPE liver
peak_62216	chr2	180525805	180526041	11.2214104235673	3.01622279450419	0.786072074094916	3.837081730676	0.000124505044307523	0.00662324605626654	9.5	37.5	FFPE-ATAC in FFPE liver
peak_64650	chr3	82463775	82464017	10.2229540252827	3.68012288422594	0.959676636661752	3.83475302371359	0.000125690525930091	0.00663983093939445	5	36.5	FFPE-ATAC in FFPE liver
peak_81294	chr5	137396607	137396860	11.2211096125853	3.01619340651522	0.78692181927998	3.8329009726468	0.000126640942275387	0.00663983093939445	9.5	40	FFPE-ATAC in FFPE liver
peak_62325	chr3	5048870	5049210	6.24095710526697	6.10319995512168	1.59290235923898	3.83149658842712	0.0001273661408491	0.00663983093939445	0	33.5	FFPE-ATAC in FFPE liver
peak_62887	chr3	26798231	26798470	6.24095710526697	6.10319995512168	1.59290235923898	3.83149658842712	0.0001273661408491	0.00663983093939445	1.5	24.5	FFPE-ATAC in FFPE liver
peak_65260	chr3	93030539	93030739	6.24095710526697	6.10319995512168	1.59290235923898	3.83149658842712	0.0001273661408491	0.00663983093939445	0	20	FFPE-ATAC in FFPE liver
peak_68268	chr3	157104847	157105133	6.24095710526697	6.10319995512168	1.59290235923898	3.83149658842712	0.0001273661408491	0.00663983093939445	0.5	28	FFPE-ATAC in FFPE liver
peak_79532	chr5	110884647	110885019	6.24095710526697	6.10319995512168	1.59290235923898	3.83149658842712	0.0001273661408491	0.00663983093939445	2	37.5	FFPE-ATAC in FFPE liver
peak_98136	chr8	82088010	82088249	6.24095710526697	6.10319995512168	1.59290235923898	3.83149658842712	0.0001273661408491	0.00663983093939445	1	24	FFPE-ATAC in FFPE liver
peak_98559	chr8	89980366	89980648	6.24095710526697	6.10319995512168	1.59290235923898	3.83149658842712	0.0001273661408491	0.00663983093939445	0.5	27.5	FFPE-ATAC in FFPE liver
peak_10119	chr10	68109382	68109703	6.240656294285	6.10315188788998	1.59290774046778	3.83145346892325	0.00012738846879114	0.00663983093939445	0.5	32	FFPE-ATAC in FFPE liver
peak_12471	chr10	115726574	115726915	6.240656294285	6.10315188788998	1.59290774046778	3.83145346892325	0.00012738846879114	0.00663983093939445	1	35	FFPE-ATAC in FFPE liver
peak_20083	chr12	4058002	4058300	6.240656294285	6.10315188788998	1.59290774046778	3.83145346892325	0.00012738846879114	0.00663983093939445	1	29.5	FFPE-ATAC in FFPE liver
peak_20744	chr12	25614332	25614686	6.240656294285	6.10315188788998	1.59290774046778	3.83145346892325	0.00012738846879114	0.00663983093939445	1.5	35.5	FFPE-ATAC in FFPE liver
peak_21187	chr12	38730087	38730432	6.240656294285	6.10315188788998	1.59290774046778	3.83145346892325	0.00012738846879114	0.00663983093939445	0	33	FFPE-ATAC in FFPE liver
peak_29881	chr14	11420070	11420363	6.240656294285	6.10315188788998	1.59290774046778	3.83145346892325	0.00012738846879114	0.00663983093939445	1.5	29.5	FFPE-ATAC in FFPE liver
peak_45967	chr17	70506463	70506805	6.240656294285	6.10315188788998	1.59290774046778	3.83145346892325	0.00012738846879114	0.00663983093939445	1	33	FFPE-ATAC in FFPE liver
peak_57269	chr2	71811869	71812636	6.240656294285	6.10315188788998	1.59290774046778	3.83145346892325	0.00012738846879114	0.00663983093939445	5	76	FFPE-ATAC in FFPE liver
peak_75424	chr4	153166043	153166251	6.240656294285	6.10315188788998	1.59290774046778	3.83145346892325	0.00012738846879114	0.00663983093939445	1	20.5	FFPE-ATAC in FFPE liver
peak_75478	chr4	154130615	154130929	6.240656294285	6.10315188788998	1.59290774046778	3.83145346892325	0.00012738846879114	0.00663983093939445	0	31	FFPE-ATAC in FFPE liver
peak_80154	chr5	120060197	120060695	6.240656294285	6.10315188788998	1.59290774046778	3.83145346892325	0.00012738846879114	0.00663983093939445	2	49	FFPE-ATAC in FFPE liver
peak_80163	chr5	120178469	120179137	6.240656294285	6.10315188788998	1.59290774046778	3.83145346892325	0.00012738846879114	0.00663983093939445	2.5	65	FFPE-ATAC in FFPE liver
peak_82072	chr5	147157409	147157822	6.240656294285	6.10315188788998	1.59290774046778	3.83145346892325	0.00012738846879114	0.00663983093939445	1	41.5	FFPE-ATAC in FFPE liver
peak_95647	chr8	14448334	14448669	6.240656294285	6.10315188788998	1.59290774046778	3.83145346892325	0.00012738846879114	0.00663983093939445	1.5	32.5	FFPE-ATAC in FFPE liver
peak_100115	chr8	121799340	121799797	6.240656294285	6.10315188788998	1.59290774046778	3.83145346892325	0.00012738846879114	0.00663983093939445	1.5	46	FFPE-ATAC in FFPE liver
peak_106371	chr9	118760921	118761156	6.240656294285	6.10315188788998	1.59290774046778	3.83145346892325	0.00012738846879114	0.00663983093939445	1.5	23	FFPE-ATAC in FFPE liver
peak_37393	chr15	83910282	83910708	10.2293715545107	4.30211980415136	1.12313757270982	3.83044776408959	0.000127910285864011	0.00664264468652975	7	65	FFPE-ATAC in FFPE liver
peak_37383	chr15	83568043	83569521	10.2290707435287	4.30209258500809	1.1231349378801	3.83043251519556	0.000127918213342961	0.00664264468652975	28	227.5	FFPE-ATAC in FFPE liver
peak_48828	chr18	46585007	46585221	10.2290707435287	4.30209258500809	1.1231349378801	3.83043251519556	0.000127918213342961	0.00664264468652975	3	33	FFPE-ATAC in FFPE liver
peak_100788	chr8	128829901	128830120	10.2290707435287	4.30209258500809	1.1231349378801	3.83043251519556	0.000127918213342961	0.00664264468652975	4	34	FFPE-ATAC in FFPE liver
peak_87682	chr6	127853693	127853982	6.24125791624894	6.1032481935592	1.59394025095757	3.82903197901717	0.000128648291014539	0.00664264468652975	1.5	29	FFPE-ATAC in FFPE liver
peak_94336	chr7	137533472	137533835	10.2296723654927	4.30214705390552	1.12359117869863	3.82892562300853	0.000128703892873892	0.00664264468652975	6	56.5	FFPE-ATAC in FFPE liver
peak_16374	chr11	71820884	71821263	6.24035548330303	6.10310359822336	1.59395654329226	3.82890212653956	0.000128716179647284	0.00664264468652975	1.5	38	FFPE-ATAC in FFPE liver
peak_23884	chr12	107429152	107429756	6.24035548330303	6.10310359822336	1.59395654329226	3.82890212653956	0.000128716179647284	0.00664264468652975	4.5	58.5	FFPE-ATAC in FFPE liver
peak_49273	chr18	60031282	60031673	6.24035548330303	6.10310359822336	1.59395654329226	3.82890212653956	0.000128716179647284	0.00664264468652975	1	39	FFPE-ATAC in FFPE liver
peak_50241	chr18	77223856	77224131	6.24035548330303	6.10310359822336	1.59395654329226	3.82890212653956	0.000128716179647284	0.00664264468652975	1.5	27.5	FFPE-ATAC in FFPE liver
peak_71352	chr4	86639618	86639937	6.24035548330303	6.10310359822336	1.59395654329226	3.82890212653956	0.000128716179647284	0.00664264468652975	1	30.5	FFPE-ATAC in FFPE liver
peak_86704	chr6	113731406	113731606	6.24035548330303	6.10310359822336	1.59395654329226	3.82890212653956	0.000128716179647284	0.00664264468652975	0.5	19.5	FFPE-ATAC in FFPE liver
peak_109099	chrX	145326330	145326641	6.24035548330303	6.10310359822336	1.59395654329226	3.82890212653956	0.000128716179647284	0.00664264468652975	1.5	30.5	FFPE-ATAC in FFPE liver
peak_90942	chr7	54851089	54851385	10.2287699325468	4.30206520473452	1.12358325571118	3.82887977625787	0.000128727868082292	0.00664264468652975	5	45.5	FFPE-ATAC in FFPE liver
peak_106841	chrUn_random	2483698	2483908	10.2287699325468	4.30206520473452	1.12358325571118	3.82887977625787	0.000128727868082292	0.00664264468652975	4	32	FFPE-ATAC in FFPE liver
peak_106836	chrUn_random	2429591	2429800	11.2226136674952	3.01631646993049	0.788372010977706	3.82600653997062	0.000130238830903862	0.00670311725056583	8	33	FFPE-ATAC in FFPE liver
peak_7423	chr1	195459608	195459844	6.24155872723091	6.10329700247028	1.59604842017563	3.8240049144616	0.000131301295606431	0.0067259434625733	0.5	23	FFPE-ATAC in FFPE liver
peak_17323	chr11	85858130	85858330	6.24155872723091	6.10329700247028	1.59604842017563	3.8240049144616	0.000131301295606431	0.0067259434625733	0.5	20	FFPE-ATAC in FFPE liver
peak_68723	chr4	14426561	14426763	6.24155872723091	6.10329700247028	1.59604842017563	3.8240049144616	0.000131301295606431	0.0067259434625733	0.5	20.5	FFPE-ATAC in FFPE liver
peak_100762	chr8	128368356	128368558	6.24155872723091	6.10329700247028	1.59604842017563	3.8240049144616	0.000131301295606431	0.0067259434625733	1	20.5	FFPE-ATAC in FFPE liver
peak_42704	chr17	4515192	4515394	6.24005467232106	6.10305469488268	1.5960760728623	3.82378684741377	0.000131417537891072	0.0067259434625733	0.5	20	FFPE-ATAC in FFPE liver
peak_7342	chr1	194490968	194491493	10.2281683105828	4.30200919485224	1.12586816926272	3.82105943866361	0.000132879618923414	0.0067755027612779	8	82.5	FFPE-ATAC in FFPE liver
peak_81380	chr5	138324910	138325178	11.2273403994826	3.01536127254412	0.789412172609648	3.81975522695058	0.000133584171445993	0.00679759238597825	11	42.5	FFPE-ATAC in FFPE liver
peak_78279	chr5	87367322	87367697	10.6204878991786	-3.26854279362628	0.856399203105242	-3.81661120395112	0.000135297111416822	0.00685103883231094	113.5	6.5	FFPE-ATAC in frozen liver
peak_45462	chr17	54302784	54302992	6.23975386133909	6.10300478337022	1.59933777208649	3.8159573855423	0.000135655917078423	0.00685474812459564	0.5	20.5	FFPE-ATAC in FFPE liver
peak_97437	chr8	68415050	68415377	6.23975386133909	6.10300478337022	1.59933777208649	3.8159573855423	0.000135655917078423	0.00685474812459564	2	32.5	FFPE-ATAC in FFPE liver
peak_88982	chr6	149117684	149118021	10.6207887101605	-3.2684834129612	0.857768109597967	-3.81045107225207	0.000138713464478694	0.00695664816991115	102	6	FFPE-ATAC in frozen liver
peak_7176	chr1	192791500	192791704	6.24216034919485	6.10339781735211	1.60376798378705	3.80566134194791	0.000141425785950389	0.00705721100337256	1	20	FFPE-ATAC in FFPE liver
peak_86437	chr6	104206930	104207292	12.9803903822213	5.68886531114005	1.4952079039521	3.80473196811185	0.000141957823827591	0.00707090374665009	1.5	73	FFPE-ATAC in FFPE liver
peak_104015	chr9	68684911	68685123	11.21517963667	3.01703879061589	0.793221046677018	3.80352841525693	0.000142649622277406	0.00709442123629579	7.5	33.5	FFPE-ATAC in FFPE liver
peak_11525	chr10	91586701	91586923	10.4731515783979	3.26462606788323	0.858683757501122	3.80189567971299	0.00014359318996046	0.00709442123629579	7.5	34	FFPE-ATAC in FFPE liver
peak_16485	chr11	74409078	74409611	10.4731515783979	3.26462606788323	0.858683757501122	3.80189567971299	0.00014359318996046	0.00709442123629579	17	81.5	FFPE-ATAC in FFPE liver
peak_18197	chr11	99122804	99123715	10.4731515783979	3.26462606788323	0.858683757501122	3.80189567971299	0.00014359318996046	0.00709442123629579	31	138	FFPE-ATAC in FFPE liver
peak_21781	chr12	64212357	64212712	10.4731515783979	3.26462606788323	0.858683757501122	3.80189567971299	0.00014359318996046	0.00709442123629579	12.5	53	FFPE-ATAC in FFPE liver
peak_50259	chr18	77825870	77826342	10.4731515783979	3.26462606788323	0.858683757501122	3.80189567971299	0.00014359318996046	0.00709442123629579	14	71	FFPE-ATAC in FFPE liver
peak_80244	chr5	121364321	121364664	10.4731515783979	3.26462606788323	0.858683757501122	3.80189567971299	0.00014359318996046	0.00709442123629579	11.5	52	FFPE-ATAC in FFPE liver
peak_100793	chr8	128885817	128886025	10.4731515783979	3.26462606788323	0.858683757501122	3.80189567971299	0.00014359318996046	0.00709442123629579	5.5	31	FFPE-ATAC in FFPE liver
peak_80985	chr5	132476445	132476873	10.4734523893798	3.26465335493676	0.85898127294321	3.80061062769245	0.000144339959454478	0.00710994716673187	14	64	FFPE-ATAC in FFPE liver
peak_12850	chr10	121431257	121431866	10.4728507674159	3.26459867075217	0.858974967040339	3.80057486657683	0.000144360793166808	0.00710994716673187	18.5	92	FFPE-ATAC in FFPE liver
peak_31576	chr14	48203831	48204474	10.4728507674159	3.26459867075217	0.858974967040339	3.80057486657683	0.000144360793166808	0.00710994716673187	20.5	96.5	FFPE-ATAC in FFPE liver
peak_41741	chr16	78252644	78253453	10.4728507674159	3.26459867075217	0.858974967040339	3.80057486657683	0.000144360793166808	0.00710994716673187	26	122	FFPE-ATAC in FFPE liver
peak_60084	chr2	145681593	145681945	10.4728507674159	3.26459867075217	0.858974967040339	3.80057486657683	0.000144360793166808	0.00710994716673187	12	53	FFPE-ATAC in FFPE liver
peak_97256	chr8	61826997	61827355	10.4728507674159	3.26459867075217	0.858974967040339	3.80057486657683	0.000144360793166808	0.00710994716673187	11.5	54.5	FFPE-ATAC in FFPE liver
peak_101300	chr9	13883035	13883442	10.4728507674159	3.26459867075217	0.858974967040339	3.80057486657683	0.000144360793166808	0.00710994716673187	13.5	62	FFPE-ATAC in FFPE liver
peak_5585	chr1	163124866	163125218	10.4737532003618	3.26468073527668	0.859847179269291	3.79681507829223	0.000146567039850093	0.00718844366120435	12	53	FFPE-ATAC in FFPE liver
peak_12054	chr10	101813539	101813878	10.4737532003618	3.26468073527668	0.859847179269291	3.79681507829223	0.000146567039850093	0.00718844366120435	10.5	50	FFPE-ATAC in FFPE liver
peak_106775	chr9	123684167	123684557	10.4725499564339	3.26457096811379	0.859834494343047	3.79674343096467	0.000146609389215224	0.00718844366120435	13.5	59	FFPE-ATAC in FFPE liver
peak_92296	chr7	94378140	94378449	6.15696485969128	-6.06785449971207	1.59922262922343	-3.79425252546518	0.000148088899640832	0.00723835596236428	59.5	0.5	FFPE-ATAC in frozen liver
peak_29719	chr14	6174236	6174598	9.97437459572852	3.64174514231877	0.960120959258904	3.7930066073443	0.000148834194655294	0.00724265121932583	7.5	53.5	FFPE-ATAC in FFPE liver
peak_86583	chr6	111490461	111490806	9.97407378474655	3.64171674721698	0.960117649573865	3.79299010786158	0.000148844088122749	0.00724265121932583	10	50	FFPE-ATAC in FFPE liver
peak_90880	chr7	53487560	53487979	9.97940213869793	3.64066708766571	0.9598613776567	3.79290923920039	0.000148892587777963	0.00724265121932583	9.5	60.5	FFPE-ATAC in FFPE liver
peak_11292	chr10	86834577	86835146	9.97910132771596	3.64063873292779	0.959858077811521	3.79289273808943	0.000148902485876594	0.00724265121932583	10.5	85.5	FFPE-ATAC in FFPE liver
peak_80830	chr5	128301159	128301384	6.23915223937515	6.10290051693206	1.60959596609368	3.79157294469566	0.000149696165925757	0.00725945958997791	0.5	22.5	FFPE-ATAC in FFPE liver
peak_42253	chr16	92636723	92637237	9.97467540671049	3.64177662802776	0.960698816328081	3.79075790053236	0.000150188293984953	0.00725945958997791	11.5	74	FFPE-ATAC in FFPE liver
peak_78174	chr5	77865682	77865925	9.97377297376458	3.64169122716505	0.960688860828609	3.79070828824228	0.000150218299278515	0.00725945958997791	6.5	36	FFPE-ATAC in FFPE liver
peak_57999	chr2	92238628	92238842	9.9797029496799	3.64069237161769	0.960438136445713	3.79065786068302	0.000150248803426647	0.00725945958997791	5.5	31	FFPE-ATAC in FFPE liver
peak_68721	chr4	14017481	14017710	9.9797029496799	3.64069237161769	0.960438136445713	3.79065786068302	0.000150248803426647	0.00725945958997791	5	34	FFPE-ATAC in FFPE liver
peak_27661	chr13	66833640	66834035	9.97880051673399	3.64060709198249	0.960428210499329	3.7906082434727	0.000150278823078101	0.00725945958997791	9	58.5	FFPE-ATAC in FFPE liver
peak_9076	chr10	42031899	42032104	10.472249145452	3.26454273503793	0.861328174196924	3.79012649630519	0.000150570585860756	0.00725945958997791	7.5	30.5	FFPE-ATAC in FFPE liver
peak_17665	chr11	93438714	93438952	10.472249145452	3.26454273503793	0.861328174196924	3.79012649630519	0.000150570585860756	0.00725945958997791	8	36	FFPE-ATAC in FFPE liver
peak_47109	chr18	3777754	3778111	10.472249145452	3.26454273503793	0.861328174196924	3.79012649630519	0.000150570585860756	0.00725945958997791	12.5	54.5	FFPE-ATAC in FFPE liver
peak_87670	chr6	127473727	127473936	9.97988969201066	4.26465917651621	1.12570929729641	3.78841960953732	0.000151608633335882	0.00727033749185765	2.5	31	FFPE-ATAC in FFPE liver
peak_5222	chr1	156054137	156054385	9.97928807004672	4.26460330939843	1.1257036831959	3.7883888744959	0.000151627386528185	0.00727033749185765	3.5	37	FFPE-ATAC in FFPE liver
peak_27598	chr13	65482049	65482267	9.97928807004672	4.26460330939843	1.1257036831959	3.7883888744959	0.000151627386528185	0.00727033749185765	3.5	32.5	FFPE-ATAC in FFPE liver
peak_55829	chr2	33438269	33438846	9.97928807004672	4.26460330939843	1.1257036831959	3.7883888744959	0.000151627386528185	0.00727033749185765	10	88	FFPE-ATAC in FFPE liver
peak_81976	chr5	146230408	146230780	9.97928807004672	4.26460330939843	1.1257036831959	3.7883888744959	0.000151627386528185	0.00727033749185765	4.5	56	FFPE-ATAC in FFPE liver
peak_27746	chr13	68738821	68739449	9.97898725906475	4.26457507085486	1.12641332173466	3.78597712630697	0.000153105758546755	0.00732379227844066	6.5	95	FFPE-ATAC in FFPE liver
peak_8740	chr10	33579710	33580151	9.9804913139746	4.26471557390934	1.12762780583982	3.78202413227396	0.00015555827713457	0.00741525975775522	5	65.5	FFPE-ATAC in FFPE liver
peak_1156	chr1	43276644	43277052	9.97819889477005	3.64053286715271	0.963337105692779	3.77908506341053	0.00015740565080909	0.00748706661675592	7	60.5	FFPE-ATAC in FFPE liver
peak_23083	chr12	88418538	88418753	9.98060538262581	3.64075130775579	0.965755424053931	3.76984815935394	0.000163346895694233	0.00762128034151379	4.5	31.5	FFPE-ATAC in FFPE liver
peak_21940	chr12	71746294	71746780	5.99117443178495	6.04428212958006	1.6041656829847	3.76786649514539	0.000164648711822582	0.00762128034151379	2	46.5	FFPE-ATAC in FFPE liver
peak_46747	chr17	85908675	85908875	5.99117443178495	6.04428212958006	1.6041656829847	3.76786649514539	0.000164648711822582	0.00762128034151379	0	19	FFPE-ATAC in FFPE liver
peak_78114	chr5	77187033	77187760	5.99117443178495	6.04428212958006	1.6041656829847	3.76786649514539	0.000164648711822582	0.00762128034151379	1.5	69	FFPE-ATAC in FFPE liver
peak_82303	chr5	150518749	150519090	5.99117443178495	6.04428212958006	1.6041656829847	3.76786649514539	0.000164648711822582	0.00762128034151379	0.5	32.5	FFPE-ATAC in FFPE liver
peak_97962	chr8	77381803	77382029	5.99117443178495	6.04428212958006	1.6041656829847	3.76786649514539	0.000164648711822582	0.00762128034151379	0.5	21.5	FFPE-ATAC in FFPE liver
peak_109658	chrY_random	23233666	23234009	5.99117443178495	6.04428212958006	1.6041656829847	3.76786649514539	0.000164648711822582	0.00762128034151379	0	32.5	FFPE-ATAC in FFPE liver
peak_10026	chr10	67405652	67405962	5.99147524276692	6.04433291120176	1.60473822387287	3.76655383493912	0.000165516406335075	0.00762128034151379	0.5	30	FFPE-ATAC in FFPE liver
peak_17079	chr11	81528751	81528989	5.99147524276692	6.04433291120176	1.60473822387287	3.76655383493912	0.000165516406335075	0.00762128034151379	0	23	FFPE-ATAC in FFPE liver
peak_21398	chr12	51599621	51599881	5.99147524276692	6.04433291120176	1.60473822387287	3.76655383493912	0.000165516406335075	0.00762128034151379	0.5	24.5	FFPE-ATAC in FFPE liver
peak_37602	chr15	86583890	86584151	5.99147524276692	6.04433291120176	1.60473822387287	3.76655383493912	0.000165516406335075	0.00762128034151379	1	25.5	FFPE-ATAC in FFPE liver
peak_42359	chr16	94017122	94017419	5.99147524276692	6.04433291120176	1.60473822387287	3.76655383493912	0.000165516406335075	0.00762128034151379	1	28	FFPE-ATAC in FFPE liver
peak_49760	chr18	67286336	67286777	5.99147524276692	6.04433291120176	1.60473822387287	3.76655383493912	0.000165516406335075	0.00762128034151379	2	41.5	FFPE-ATAC in FFPE liver
peak_68143	chr3	152252339	152252700	5.99147524276692	6.04433291120176	1.60473822387287	3.76655383493912	0.000165516406335075	0.00762128034151379	1	33.5	FFPE-ATAC in FFPE liver
peak_79661	chr5	113038386	113038860	5.99147524276692	6.04433291120176	1.60473822387287	3.76655383493912	0.000165516406335075	0.00762128034151379	1	44	FFPE-ATAC in FFPE liver
peak_80831	chr5	128301402	128301602	5.99147524276692	6.04433291120176	1.60473822387287	3.76655383493912	0.000165516406335075	0.00762128034151379	0	19	FFPE-ATAC in FFPE liver
peak_86571	chr6	110598890	110599234	5.99147524276692	6.04433291120176	1.60473822387287	3.76655383493912	0.000165516406335075	0.00762128034151379	1.5	33.5	FFPE-ATAC in FFPE liver
peak_102777	chr9	49308115	49308367	5.99147524276692	6.04433291120176	1.60473822387287	3.76655383493912	0.000165516406335075	0.00762128034151379	0.5	23.5	FFPE-ATAC in FFPE liver
peak_103287	chr9	58196366	58196571	5.99147524276692	6.04433291120176	1.60473822387287	3.76655383493912	0.000165516406335075	0.00762128034151379	1	20	FFPE-ATAC in FFPE liver
peak_1846	chr1	63439210	63439603	5.99087362080298	6.04423131875913	1.60474883582012	3.76646561994242	0.00016557487220397	0.00762128034151379	2	38.5	FFPE-ATAC in FFPE liver
peak_9627	chr10	59115929	59116272	5.99087362080298	6.04423131875913	1.60474883582012	3.76646561994242	0.00016557487220397	0.00762128034151379	1.5	33	FFPE-ATAC in FFPE liver
peak_13031	chr10	125804255	125804652	5.99087362080298	6.04423131875913	1.60474883582012	3.76646561994242	0.00016557487220397	0.00762128034151379	2	37	FFPE-ATAC in FFPE liver
peak_17080	chr11	81680574	81680974	5.99087362080298	6.04423131875913	1.60474883582012	3.76646561994242	0.00016557487220397	0.00762128034151379	1	37	FFPE-ATAC in FFPE liver
peak_34724	chr15	16911094	16911398	5.99087362080298	6.04423131875913	1.60474883582012	3.76646561994242	0.00016557487220397	0.00762128034151379	1.5	28	FFPE-ATAC in FFPE liver
peak_39371	chr16	17710542	17710768	5.99087362080298	6.04423131875913	1.60474883582012	3.76646561994242	0.00016557487220397	0.00762128034151379	0.5	22	FFPE-ATAC in FFPE liver
peak_48223	chr18	34897720	34897920	5.99087362080298	6.04423131875913	1.60474883582012	3.76646561994242	0.00016557487220397	0.00762128034151379	1	19	FFPE-ATAC in FFPE liver
peak_73223	chr4	125573630	125573856	5.99087362080298	6.04423131875913	1.60474883582012	3.76646561994242	0.00016557487220397	0.00762128034151379	1	21.5	FFPE-ATAC in FFPE liver
peak_74881	chr4	146345941	146346173	5.99087362080298	6.04423131875913	1.60474883582012	3.76646561994242	0.00016557487220397	0.00762128034151379	0.5	22	FFPE-ATAC in FFPE liver
peak_74955	chr4	147673230	147673559	5.99087362080298	6.04423131875913	1.60474883582012	3.76646561994242	0.00016557487220397	0.00762128034151379	1.5	31	FFPE-ATAC in FFPE liver
peak_76948	chr5	38681000	38681200	5.99087362080298	6.04423131875913	1.60474883582012	3.76646561994242	0.00016557487220397	0.00762128034151379	0	19	FFPE-ATAC in FFPE liver
peak_103455	chr9	61536231	61536759	5.99087362080298	6.04423131875913	1.60474883582012	3.76646561994242	0.00016557487220397	0.00762128034151379	3	48.5	FFPE-ATAC in FFPE liver
peak_107204	chrX	10096236	10096473	5.99087362080298	6.04423131875913	1.60474883582012	3.76646561994242	0.00016557487220397	0.00762128034151379	1	23	FFPE-ATAC in FFPE liver
peak_24325	chr12	114027765	114027965	5.99177605374889	6.04438408031486	1.60648201668447	3.76249719420422	0.000168225196248773	0.00766530118970129	0.5	18.5	FFPE-ATAC in FFPE liver
peak_92169	chr7	89354551	89354839	5.99177605374889	6.04438408031486	1.60648201668447	3.76249719420422	0.000168225196248773	0.00766530118970129	1.5	27	FFPE-ATAC in FFPE liver
peak_7151	chr1	192308097	192308297	5.99057280982101	6.04418006571404	1.60650355450056	3.76231975882125	0.000168344624009344	0.00766530118970129	0	19.5	FFPE-ATAC in FFPE liver
peak_11198	chr10	84969823	84970194	5.99057280982101	6.04418006571404	1.60650355450056	3.76231975882125	0.000168344624009344	0.00766530118970129	2.5	35	FFPE-ATAC in FFPE liver
peak_32638	chr14	68085466	68085947	5.99057280982101	6.04418006571404	1.60650355450056	3.76231975882125	0.000168344624009344	0.00766530118970129	3.5	46.5	FFPE-ATAC in FFPE liver
peak_55118	chr2	25617161	25617361	5.99057280982101	6.04418006571404	1.60650355450056	3.76231975882125	0.000168344624009344	0.00766530118970129	1	19	FFPE-ATAC in FFPE liver
peak_55333	chr2	27923764	27923964	5.99057280982101	6.04418006571404	1.60650355450056	3.76231975882125	0.000168344624009344	0.00766530118970129	0.5	19.5	FFPE-ATAC in FFPE liver
peak_92508	chr7	104009452	104009729	5.99057280982101	6.04418006571404	1.60650355450056	3.76231975882125	0.000168344624009344	0.00766530118970129	1.5	26.5	FFPE-ATAC in FFPE liver
peak_95618	chr8	13557168	13557400	5.99057280982101	6.04418006571404	1.60650355450056	3.76231975882125	0.000168344624009344	0.00766530118970129	1	22.5	FFPE-ATAC in FFPE liver
peak_98504	chr8	89080852	89081089	5.99057280982101	6.04418006571404	1.60650355450056	3.76231975882125	0.000168344624009344	0.00766530118970129	1	23	FFPE-ATAC in FFPE liver
peak_101448	chr9	20509811	20510052	5.99057280982101	6.04418006571404	1.60650355450056	3.76231975882125	0.000168344624009344	0.00766530118970129	1	23	FFPE-ATAC in FFPE liver
peak_102015	chr9	34278345	34278742	5.99057280982101	6.04418006571404	1.60650355450056	3.76231975882125	0.000168344624009344	0.00766530118970129	2	37.5	FFPE-ATAC in FFPE liver
peak_88486	chr6	141924774	141925364	10.3762203219787	-3.23129393792743	0.859603647500168	-3.75905098509578	0.000170559081506385	0.00774685416915697	172.5	10.5	FFPE-ATAC in frozen liver
peak_7326	chr1	194019240	194019494	5.99207686473086	6.04443604228787	1.60944577228121	3.75560093194102	0.00017292605206174	0.00777911194484736	0.5	23.5	FFPE-ATAC in FFPE liver
peak_78191	chr5	80536527	80536731	5.99207686473086	6.04443604228787	1.60944577228121	3.75560093194102	0.00017292605206174	0.00777911194484736	0.5	19.5	FFPE-ATAC in FFPE liver
peak_42460	chr16	95623231	95623458	5.99027199883904	6.04412796032509	1.6094788701789	3.7553322832087	0.000173111653940683	0.00777911194484736	1	21.5	FFPE-ATAC in FFPE liver
peak_53072	chr19	43789831	43790179	5.99027199883904	6.04412796032509	1.6094788701789	3.7553322832087	0.000173111653940683	0.00777911194484736	1.5	32.5	FFPE-ATAC in FFPE liver
peak_56679	chr2	59200548	59200751	5.99027199883904	6.04412796032509	1.6094788701789	3.7553322832087	0.000173111653940683	0.00777911194484736	1	19	FFPE-ATAC in FFPE liver
peak_93993	chr7	133151533	133151735	5.99027199883904	6.04412796032509	1.6094788701789	3.7553322832087	0.000173111653940683	0.00777911194484736	0.5	19	FFPE-ATAC in FFPE liver
peak_95373	chr8	10846142	10846389	5.99027199883904	6.04412796032509	1.6094788701789	3.7553322832087	0.000173111653940683	0.00777911194484736	1	24	FFPE-ATAC in FFPE liver
peak_101632	chr9	22008832	22010047	10.3765211329606	-3.23123458453583	0.86103141670771	-3.75274876367574	0.000174906124581983	0.00784369659425437	363.5	19.5	FFPE-ATAC in frozen liver
peak_52797	chr19	40266484	40266792	10.3809470539661	-3.23182165811938	0.86141499298478	-3.75175923850734	0.000175598054458379	0.0078650877260283	89.5	4.5	FFPE-ATAC in frozen liver
peak_97377	chr8	65325215	65325424	9.73010701852863	4.22617121526431	1.12791661368788	3.74688267197895	0.000179045778943036	0.00796477012056982	3.5	30	FFPE-ATAC in FFPE liver
peak_103372	chr9	60386848	60387981	9.73010701852863	4.22617121526431	1.12791661368788	3.74688267197895	0.000179045778943036	0.00796477012056982	18	166.5	FFPE-ATAC in FFPE liver
peak_22777	chr12	84265731	84266353	9.72980620754666	4.22614259956293	1.12791369583595	3.74686699449176	0.000179056964844247	0.00796477012056982	10	90.5	FFPE-ATAC in FFPE liver
peak_42706	chr17	4536747	4537084	9.72980620754666	4.22614259956293	1.12791369583595	3.74686699449176	0.000179056964844247	0.00796477012056982	4.5	48.5	FFPE-ATAC in FFPE liver
peak_80144	chr5	119856892	119857146	5.98997118785707	6.04407460360788	1.61375851664712	3.74534017404633	0.000180149506300061	0.00799050716362329	1	23.5	FFPE-ATAC in FFPE liver
peak_80832	chr5	128305672	128305966	5.98997118785707	6.04407460360788	1.61375851664712	3.74534017404633	0.000180149506300061	0.00799050716362329	0	28	FFPE-ATAC in FFPE liver
peak_48827	chr18	46581076	46581623	9.7304078295106	4.22619986623619	1.12841649197701	3.74524822730283	0.000180215499990666	0.00799050716362329	10.5	79.5	FFPE-ATAC in FFPE liver
peak_107800	chrX	47973089	47973490	9.7304078295106	4.22619986623619	1.12841649197701	3.74524822730283	0.000180215499990666	0.00799050716362329	5.5	58.5	FFPE-ATAC in FFPE liver
peak_14829	chr11	44469507	44469715	10.2236697158978	3.22616549653746	0.861999511528085	3.74265350895428	0.000182087226928733	0.00801729934208652	6.5	30.5	FFPE-ATAC in FFPE liver
peak_31288	chr14	42737401	42737760	10.2236697158978	3.22616549653746	0.861999511528085	3.74265350895428	0.000182087226928733	0.00801729934208652	11.5	52	FFPE-ATAC in FFPE liver
peak_49514	chr18	63451961	63452312	10.2236697158978	3.22616549653746	0.861999511528085	3.74265350895428	0.000182087226928733	0.00801729934208652	13	52.5	FFPE-ATAC in FFPE liver
peak_86099	chr6	95158217	95158880	10.2236697158978	3.22616549653746	0.861999511528085	3.74265350895428	0.000182087226928733	0.00801729934208652	21.5	99	FFPE-ATAC in FFPE liver
peak_107242	chrX	11302911	11303141	10.2236697158978	3.22616549653746	0.861999511528085	3.74265350895428	0.000182087226928733	0.00801729934208652	7	33.5	FFPE-ATAC in FFPE liver
peak_10000	chr10	66775489	66775820	10.2233689049158	3.22613746169838	0.861996092769897	3.74263582951016	0.000182100042641546	0.00801729934208652	11.5	49	FFPE-ATAC in FFPE liver
peak_18685	chr11	105383830	105384159	10.2233689049158	3.22613746169838	0.861996092769897	3.74263582951016	0.000182100042641546	0.00801729934208652	9.5	47.5	FFPE-ATAC in FFPE liver
peak_37481	chr15	85436327	85436908	10.2233689049158	3.22613746169838	0.861996092769897	3.74263582951016	0.000182100042641546	0.00801729934208652	18.5	84	FFPE-ATAC in FFPE liver
peak_81005	chr5	133427428	133427801	10.2233689049158	3.22613746169838	0.861996092769897	3.74263582951016	0.000182100042641546	0.00801729934208652	11.5	54.5	FFPE-ATAC in FFPE liver
peak_82803	chr6	16852920	16853126	9.7245919222465	3.60221275296315	0.962887518969544	3.74105249262981	0.000183251238168632	0.00802485548987551	4.5	29	FFPE-ATAC in FFPE liver
peak_109635	chrY_random	17610751	17611725	5.92275236843021	-6.01102598914351	1.60698465028526	-3.7405621690764	0.000183609122486414	0.00802485548987551	179	0	FFPE-ATAC in frozen liver
peak_56801	chr2	60850984	60851489	10.2239705268798	3.2261935244269	0.862622241022872	3.73998416804253	0.000184031845891642	0.00802485548987551	13.5	74.5	FFPE-ATAC in FFPE liver
peak_58459	chr2	105014843	105015301	10.2230680939339	3.226109203075	0.862611960667992	3.73993098887332	0.000184070784620153	0.00802485548987551	13.5	67.5	FFPE-ATAC in FFPE liver
peak_68798	chr4	16011074	16011738	10.2230680939339	3.226109203075	0.862611960667992	3.73993098887332	0.000184070784620153	0.00802485548987551	25	97	FFPE-ATAC in FFPE liver
peak_95276	chr8	4732759	4732965	10.2230680939339	3.226109203075	0.862611960667992	3.73993098887332	0.000184070784620153	0.00802485548987551	6.5	30.5	FFPE-ATAC in FFPE liver
peak_100112	chr8	121614366	121614747	10.2230680939339	3.226109203075	0.862611960667992	3.73993098887332	0.000184070784620153	0.00802485548987551	12	55.5	FFPE-ATAC in FFPE liver
peak_14406	chr11	29999118	29999332	9.72489273322847	3.60224346830237	0.963191881206655	3.73990223400721	0.000184091842667958	0.00802485548987551	6.5	31	FFPE-ATAC in FFPE liver
peak_70023	chr4	54005416	54005783	9.72489273322847	3.60224346830237	0.963191881206655	3.73990223400721	0.000184091842667958	0.00802485548987551	7	52	FFPE-ATAC in FFPE liver
peak_107827	chrX	49160888	49161239	9.72489273322847	3.60224346830237	0.963191881206655	3.73990223400721	0.000184091842667958	0.00802485548987551	10.5	50.5	FFPE-ATAC in FFPE liver
peak_2685	chr1	87501188	87501417	9.72429111126453	3.60218515670113	0.963184997706635	3.73986842120466	0.000184116607691076	0.00802485548987551	5	33	FFPE-ATAC in FFPE liver
peak_18654	chr11	104479920	104480374	9.72992027619787	3.601141202693	0.962929583083951	3.73977626812515	0.000184184117941745	0.00802485548987551	10.5	64.5	FFPE-ATAC in FFPE liver
peak_25007	chr13	13960756	13960980	9.72931865423393	3.60108297446798	0.962922716627137	3.73974246560681	0.000184208887097825	0.00802485548987551	6	32.5	FFPE-ATAC in FFPE liver
peak_39961	chr16	26993368	26993890	9.72931865423393	3.60108297446798	0.962922716627137	3.73974246560681	0.000184208887097825	0.00802485548987551	11.5	73.5	FFPE-ATAC in FFPE liver
peak_11207	chr10	85422609	85422884	9.72890377460075	4.22605482571808	1.13092885586215	3.73679989135691	0.000186377131261496	0.00809361861037115	4.5	40.5	FFPE-ATAC in FFPE liver
peak_27632	chr13	66162753	66163187	9.72890377460075	4.22605482571808	1.13092885586215	3.73679989135691	0.000186377131261496	0.00809361861037115	9	65	FFPE-ATAC in FFPE liver
peak_30447	chr14	25612720	25613619	12.2319447947212	5.60141639322201	1.49963936135377	3.73517562793593	0.000187584227308861	0.00811652456087207	7	171	FFPE-ATAC in FFPE liver
peak_35928	chr15	58534376	58534602	10.2227672829519	3.22608051496497	0.863832085126934	3.73461529215011	0.000188002351404747	0.00811804470509186	7.5	33	FFPE-ATAC in FFPE liver
peak_101071	chr8_random	710117	710417	10.2227672829519	3.22608051496497	0.863832085126934	3.73461529215011	0.000188002351404747	0.00811804470509186	7.5	45	FFPE-ATAC in FFPE liver
peak_33667	chr14	108978027	108978236	10.2189429839104	3.22722537633004	0.864310326366677	3.73387344554405	0.000188557267105379	0.00813040272588204	6.5	30.5	FFPE-ATAC in FFPE liver
peak_87684	chr6	127890338	127890736	10.2189429839104	3.22722537633004	0.864310326366677	3.73387344554405	0.000188557267105379	0.00813040272588204	13	58	FFPE-ATAC in FFPE liver
peak_65849	chr3	100999115	100999412	5.9896703768751	6.04401964135028	1.6194190322253	3.73221477645905	0.000189803557888718	0.00816810050512794	1.5	29.5	FFPE-ATAC in FFPE liver
peak_106433	chr9	119546604	119547213	5.9896703768751	6.04401964135028	1.6194190322253	3.73221477645905	0.000189803557888718	0.00816810050512794	3	59	FFPE-ATAC in FFPE liver
peak_86737	chr6	114516087	114516379	10.2177397399825	3.22712302113007	0.865576100014101	3.72829497149644	0.000192779656881503	0.00826378114490756	11	42.5	FFPE-ATAC in FFPE liver
peak_66696	chr3	120885423	120885638	10.2224664719699	3.22605115788788	0.865729949726856	3.72639430910958	0.0001942384643263	0.00830859739880382	6.5	32	FFPE-ATAC in FFPE liver
peak_23169	chr12	92511246	92511806	9.48032434504661	4.18662833912425	1.13028261527261	3.70405443961863	0.000212180691806344	0.00874849635328121	12	79	FFPE-ATAC in FFPE liver
peak_75854	chr5	10025284	10025516	9.48032434504661	4.18662833912425	1.13028261527261	3.70405443961863	0.000212180691806344	0.00874849635328121	2	33	FFPE-ATAC in FFPE liver
peak_41103	chr16	47159293	47159508	9.48062515602858	4.18665768047659	1.13054602259956	3.70321738061567	0.000212882317022705	0.00874849635328121	3	30.5	FFPE-ATAC in FFPE liver
peak_54154	chr1_random	807349	807686	9.48062515602858	4.18665768047659	1.13054602259956	3.70321738061567	0.000212882317022705	0.00874849635328121	5	48.5	FFPE-ATAC in FFPE liver
peak_61846	chr2	172309031	172309436	9.48062515602858	4.18665768047659	1.13054602259956	3.70321738061567	0.000212882317022705	0.00874849635328121	5	57.5	FFPE-ATAC in FFPE liver
peak_47436	chr18	10839605	10840088	9.48002353406464	4.18659892273642	1.13054009200672	3.70318483381264	0.000212909641799167	0.00874849635328121	10	68	FFPE-ATAC in FFPE liver
peak_56861	chr2	62954825	62955144	9.48002353406464	4.18659892273642	1.13054009200672	3.70318483381264	0.000212909641799167	0.00874849635328121	4	46	FFPE-ATAC in FFPE liver
peak_75374	chr4	151663094	151663805	9.48002353406464	4.18659892273642	1.13054009200672	3.70318483381264	0.000212909641799167	0.00874849635328121	6.5	104	FFPE-ATAC in FFPE liver
peak_84199	chr6	50845188	50845400	9.48002353406464	4.18659892273642	1.13054009200672	3.70318483381264	0.000212909641799167	0.00874849635328121	3.5	30.5	FFPE-ATAC in FFPE liver
peak_88812	chr6	145968187	145968579	9.48002353406464	4.18659892273642	1.13054009200672	3.70318483381264	0.000212909641799167	0.00874849635328121	5.5	55.5	FFPE-ATAC in FFPE liver
peak_470	chr1	21678567	21678890	5.74169256928489	5.98290823951957	1.61575759870042	3.70285013317078	0.000213190831988307	0.00874849635328121	1.5	30.5	FFPE-ATAC in FFPE liver
peak_9694	chr10	60130606	60130916	5.74169256928489	5.98290823951957	1.61575759870042	3.70285013317078	0.000213190831988307	0.00874849635328121	1	28	FFPE-ATAC in FFPE liver
peak_21376	chr12	47536569	47536902	5.74169256928489	5.98290823951957	1.61575759870042	3.70285013317078	0.000213190831988307	0.00874849635328121	1	29.5	FFPE-ATAC in FFPE liver
peak_40304	chr16	32211391	32212459	5.74169256928489	5.98290823951957	1.61575759870042	3.70285013317078	0.000213190831988307	0.00874849635328121	5	97.5	FFPE-ATAC in FFPE liver
peak_43183	chr17	13294094	13294337	5.74169256928489	5.98290823951957	1.61575759870042	3.70285013317078	0.000213190831988307	0.00874849635328121	1	22.5	FFPE-ATAC in FFPE liver
peak_47015	chr17	89238386	89238852	5.74169256928489	5.98290823951957	1.61575759870042	3.70285013317078	0.000213190831988307	0.00874849635328121	1	41	FFPE-ATAC in FFPE liver
peak_28166	chr13	86103573	86103892	5.74139175830292	5.98285472425547	1.61576198356511	3.70280696359409	0.000213227125184898	0.00874849635328121	0.5	29	FFPE-ATAC in FFPE liver
peak_30431	chr14	24765778	24766161	5.74139175830292	5.98285472425547	1.61576198356511	3.70280696359409	0.000213227125184898	0.00874849635328121	1	34	FFPE-ATAC in FFPE liver
peak_32379	chr14	64734643	64734951	5.74139175830292	5.98285472425547	1.61576198356511	3.70280696359409	0.000213227125184898	0.00874849635328121	1.5	28	FFPE-ATAC in FFPE liver
peak_50420	chr18	82472092	82472406	5.74139175830292	5.98285472425547	1.61576198356511	3.70280696359409	0.000213227125184898	0.00874849635328121	1	28	FFPE-ATAC in FFPE liver
peak_68178	chr3	153287263	153288124	5.74139175830292	5.98285472425547	1.61576198356511	3.70280696359409	0.000213227125184898	0.00874849635328121	5	78	FFPE-ATAC in FFPE liver
peak_79617	chr5	112131537	112132151	5.74139175830292	5.98285472425547	1.61576198356511	3.70280696359409	0.000213227125184898	0.00874849635328121	0.5	55	FFPE-ATAC in FFPE liver
peak_80991	chr5	132891495	132891822	5.74139175830292	5.98285472425547	1.61576198356511	3.70280696359409	0.000213227125184898	0.00874849635328121	0.5	29	FFPE-ATAC in FFPE liver
peak_86728	chr6	114259642	114260047	5.74139175830292	5.98285472425547	1.61576198356511	3.70280696359409	0.000213227125184898	0.00874849635328121	1	38.5	FFPE-ATAC in FFPE liver
peak_109076	chrX	143720061	143720460	5.74139175830292	5.98285472425547	1.61576198356511	3.70280696359409	0.000213227125184898	0.00874849635328121	1	37	FFPE-ATAC in FFPE liver
peak_92299	chr7	94396402	94396882	9.62814821914001	-3.56780197702566	0.96373702856746	-3.70204928447026	0.000213865060697002	0.00875626325580625	136	7	FFPE-ATAC in frozen liver
peak_18922	chr11	107973618	107973975	9.48092596701055	4.18668717250213	1.13133495662526	3.70066101819298	0.000215038578203226	0.00875626325580625	3.5	50	FFPE-ATAC in FFPE liver
peak_82709	chr6	12664762	12665467	9.47972272308267	4.18656920431432	1.13132304660671	3.70059570241366	0.000215093939041229	0.00875626325580625	14.5	99	FFPE-ATAC in FFPE liver
peak_102545	chr9	45546698	45547074	9.47972272308267	4.18656920431432	1.13132304660671	3.70059570241366	0.000215093939041229	0.00875626325580625	6.5	53	FFPE-ATAC in FFPE liver
peak_31033	chr14	34562553	34562753	5.74199338026686	5.98296194352425	1.61703940433431	3.69994814442218	0.000215643525634051	0.00875626325580625	0.5	18.5	FFPE-ATAC in FFPE liver
peak_6709	chr1	183457639	183458026	5.74109094732095	5.9828009578579	1.61705271234093	3.69981813963064	0.000215754020340094	0.00875626325580625	1	36.5	FFPE-ATAC in FFPE liver
peak_6919	chr1	187344459	187344991	5.74109094732095	5.9828009578579	1.61705271234093	3.69981813963064	0.000215754020340094	0.00875626325580625	2.5	47.5	FFPE-ATAC in FFPE liver
peak_43369	chr17	16098520	16098720	5.74109094732095	5.9828009578579	1.61705271234093	3.69981813963064	0.000215754020340094	0.00875626325580625	0	18	FFPE-ATAC in FFPE liver
peak_50475	chr18	83353832	83354442	5.74109094732095	5.9828009578579	1.61705271234093	3.69981813963064	0.000215754020340094	0.00875626325580625	2	56.5	FFPE-ATAC in FFPE liver
peak_95352	chr8	10190029	10190800	5.74109094732095	5.9828009578579	1.61705271234093	3.69981813963064	0.000215754020340094	0.00875626325580625	4.5	68	FFPE-ATAC in FFPE liver
peak_95512	chr8	12254207	12254579	5.74109094732095	5.9828009578579	1.61705271234093	3.69981813963064	0.000215754020340094	0.00875626325580625	1	33.5	FFPE-ATAC in FFPE liver
peak_98563	chr8	90339263	90339585	5.74109094732095	5.9828009578579	1.61705271234093	3.69981813963064	0.000215754020340094	0.00875626325580625	1	29.5	FFPE-ATAC in FFPE liver
peak_98642	chr8	91737813	91738126	5.74109094732095	5.9828009578579	1.61705271234093	3.69981813963064	0.000215754020340094	0.00875626325580625	1.5	29	FFPE-ATAC in FFPE liver
peak_106820	chrUn_random	235547	236320	5.74109094732095	5.9828009578579	1.61705271234093	3.69981813963064	0.000215754020340094	0.00875626325580625	3	70.5	FFPE-ATAC in FFPE liver
peak_108546	chrX	100651170	100651528	5.74109094732095	5.9828009578579	1.61705271234093	3.69981813963064	0.000215754020340094	0.00875626325580625	1.5	33	FFPE-ATAC in FFPE liver
peak_93634	chr7	125617956	125618351	9.47499599109523	4.18778666141846	1.13247720862425	3.69789928620801	0.000217391103037504	0.0087966873138814	6.5	55.5	FFPE-ATAC in FFPE liver
peak_65752	chr3	98451126	98451416	10.1322535557607	-3.1929983929138	0.864363465529823	-3.69404598904074	0.000220713857440946	0.00885777399406085	83	4.5	FFPE-ATAC in frozen liver
peak_32088	chr14	59627883	59628083	5.74229419124883	5.98301628937401	1.61964496594168	3.69402950349394	0.000220728175055079	0.00885777399406085	0.5	17.5	FFPE-ATAC in FFPE liver
peak_68820	chr4	19353142	19353342	5.74229419124883	5.98301628937401	1.61964496594168	3.69402950349394	0.000220728175055079	0.00885777399406085	1	18	FFPE-ATAC in FFPE liver
peak_73588	chr4	130979176	130979462	5.74229419124883	5.98301628937401	1.61964496594168	3.69402950349394	0.000220728175055079	0.00885777399406085	0.5	26	FFPE-ATAC in FFPE liver
peak_890	chr1	37641546	37641794	5.74079013633898	5.98274650634191	1.61966766116155	3.69381117485014	0.00022091787463895	0.00885777399406085	1	22.5	FFPE-ATAC in FFPE liver
peak_935	chr1	38757920	38758243	5.74079013633898	5.98274650634191	1.61966766116155	3.69381117485014	0.00022091787463895	0.00885777399406085	2	29	FFPE-ATAC in FFPE liver
peak_7154	chr1	192500983	192501318	5.74079013633898	5.98274650634191	1.61966766116155	3.69381117485014	0.00022091787463895	0.00885777399406085	0.5	31	FFPE-ATAC in FFPE liver
peak_27268	chr13	58783242	58783559	5.74079013633898	5.98274650634191	1.61966766116155	3.69381117485014	0.00022091787463895	0.00885777399406085	1	28	FFPE-ATAC in FFPE liver
peak_37475	chr15	85393889	85394150	5.74079013633898	5.98274650634191	1.61966766116155	3.69381117485014	0.00022091787463895	0.00885777399406085	1	24	FFPE-ATAC in FFPE liver
peak_46673	chr17	84955298	84955555	5.74079013633898	5.98274650634191	1.61966766116155	3.69381117485014	0.00022091787463895	0.00885777399406085	1	23.5	FFPE-ATAC in FFPE liver
peak_62210	chr2	180485239	180485439	5.74079013633898	5.98274650634191	1.61966766116155	3.69381117485014	0.00022091787463895	0.00885777399406085	1	18.5	FFPE-ATAC in FFPE liver
peak_75417	chr4	152848803	152849377	5.74079013633898	5.98274650634191	1.61966766116155	3.69381117485014	0.00022091787463895	0.00885777399406085	1.5	52	FFPE-ATAC in FFPE liver
peak_79079	chr5	102657105	102657494	5.74079013633898	5.98274650634191	1.61966766116155	3.69381117485014	0.00022091787463895	0.00885777399406085	1.5	36	FFPE-ATAC in FFPE liver
peak_80084	chr5	118917496	118917749	5.74079013633898	5.98274650634191	1.61966766116155	3.69381117485014	0.00022091787463895	0.00885777399406085	0.5	23	FFPE-ATAC in FFPE liver
peak_80228	chr5	121086848	121087048	5.74079013633898	5.98274650634191	1.61966766116155	3.69381117485014	0.00022091787463895	0.00885777399406085	0	18.5	FFPE-ATAC in FFPE liver
peak_31323	chr14	44161683	44161923	9.47511005974644	3.56159671365672	0.965865185907618	3.68746773941324	0.000226496797790176	0.0089639452358809	6	33	FFPE-ATAC in FFPE liver
peak_57180	chr2	70619872	70620221	9.47480924876447	3.5615668254815	0.965861701205023	3.68745009874399	0.000226512495177344	0.0089639452358809	6	49.5	FFPE-ATAC in FFPE liver
peak_70117	chr4	56441610	56442016	9.47480924876447	3.5615668254815	0.965861701205023	3.68745009874399	0.000226512495177344	0.0089639452358809	11.5	55.5	FFPE-ATAC in FFPE liver
peak_98680	chr8	92673138	92673489	9.47480924876447	3.5615668254815	0.965861701205023	3.68745009874399	0.000226512495177344	0.0089639452358809	8	48.5	FFPE-ATAC in FFPE liver
peak_106495	chr9	120450222	120450453	9.47480924876447	3.5615668254815	0.965861701205023	3.68745009874399	0.000226512495177344	0.0089639452358809	6.5	31.5	FFPE-ATAC in FFPE liver
peak_15474	chr11	57397015	57397231	9.48013760271585	3.56047501952645	0.965599713908407	3.68731987824945	0.000226628402280349	0.0089639452358809	5	30	FFPE-ATAC in FFPE liver
peak_53852	chr19	57042438	57042702	9.48013760271585	3.56047501952645	0.965599713908407	3.68731987824945	0.000226628402280349	0.0089639452358809	6	36.5	FFPE-ATAC in FFPE liver
peak_109630	chrY_random	17187908	17188120	9.48013760271585	3.56047501952645	0.965599713908407	3.68731987824945	0.000226628402280349	0.0089639452358809	4.5	29.5	FFPE-ATAC in FFPE liver
peak_101057	chr8_random	479368	480122	9.47983679173388	3.56044517363167	0.965596235962552	3.68730225018167	0.000226644097008602	0.0089639452358809	18.5	104	FFPE-ATAC in FFPE liver
peak_11260	chr10	86334708	86335770	11.7323794477571	5.53998087421422	1.50277991191969	3.68648850724743	0.000227369705076397	0.0089639452358809	9	192.5	FFPE-ATAC in FFPE liver
peak_11291	chr10	86831839	86832426	11.7270510938057	5.54044431318638	1.50303831093049	3.68616306909466	0.000227660505589571	0.0089639452358809	5	109	FFPE-ATAC in FFPE liver
peak_15381	chr11	54696264	54696472	11.7279535267516	5.54051563855778	1.50341053078671	3.68529787779159	0.000228435309826174	0.0089639452358809	2	37.5	FFPE-ATAC in FFPE liver
peak_68383	chr4	4511748	4512280	9.4745084377825	3.56154009242516	0.966491843821731	3.68501825979411	0.000228686244677326	0.0089639452358809	14.5	74.5	FFPE-ATAC in FFPE liver
peak_69235	chr4	39874984	39875580	9.4745084377825	3.56154009242516	0.966491843821731	3.68501825979411	0.000228686244677326	0.0089639452358809	14	82.5	FFPE-ATAC in FFPE liver
peak_107090	chrX	4816289	4816492	5.7425950022308	5.98307165266539	1.62362959375715	3.68499790572326	0.000228704520930481	0.0089639452358809	0.5	19	FFPE-ATAC in FFPE liver
peak_41178	chr16	51849875	51850139	9.48043841369782	3.5605014951755	0.966235691944486	3.68492027862293	0.000228774236158351	0.0089639452358809	7	36.5	FFPE-ATAC in FFPE liver
peak_5518	chr1	162402698	162403363	9.47953598075191	3.56041171540771	0.966225227197373	3.68486727026888	0.000228821853279671	0.0089639452358809	14	91.5	FFPE-ATAC in FFPE liver
peak_47714	chr18	15927644	15927950	9.47953598075191	3.56041171540771	0.966225227197373	3.68486727026888	0.000228821853279671	0.0089639452358809	8	43	FFPE-ATAC in FFPE liver
peak_58443	chr2	104617770	104617990	9.47953598075191	3.56041171540771	0.966225227197373	3.68486727026888	0.000228821853279671	0.0089639452358809	4.5	31	FFPE-ATAC in FFPE liver
peak_59967	chr2	143442050	143442393	9.47953598075191	3.56041171540771	0.966225227197373	3.68486727026888	0.000228821853279671	0.0089639452358809	8	48	FFPE-ATAC in FFPE liver
peak_90298	chr7	34622985	34623238	9.47953598075191	3.56041171540771	0.966225227197373	3.68486727026888	0.000228821853279671	0.0089639452358809	5	35.5	FFPE-ATAC in FFPE liver
peak_19223	chr11	113207521	113208163	5.74048932535701	5.98269093317771	1.62366271380159	3.6846882559556	0.000228982729640769	0.0089639452358809	4	59	FFPE-ATAC in FFPE liver
peak_26167	chr13	38492958	38493468	5.74048932535701	5.98269093317771	1.62366271380159	3.6846882559556	0.000228982729640769	0.0089639452358809	2	48	FFPE-ATAC in FFPE liver
peak_41451	chr16	63481491	63481691	5.74048932535701	5.98269093317771	1.62366271380159	3.6846882559556	0.000228982729640769	0.0089639452358809	0	18	FFPE-ATAC in FFPE liver
peak_70837	chr4	65937825	65938025	5.74048932535701	5.98269093317771	1.62366271380159	3.6846882559556	0.000228982729640769	0.0089639452358809	0.5	18.5	FFPE-ATAC in FFPE liver
peak_80167	chr5	120375061	120375455	5.74048932535701	5.98269093317771	1.62366271380159	3.6846882559556	0.000228982729640769	0.0089639452358809	2	36.5	FFPE-ATAC in FFPE liver
peak_81691	chr5	142239397	142239684	5.74048932535701	5.98269093317771	1.62366271380159	3.6846882559556	0.000228982729640769	0.0089639452358809	1	26.5	FFPE-ATAC in FFPE liver
peak_107878	chrX	50573194	50573579	5.74048932535701	5.98269093317771	1.62366271380159	3.6846882559556	0.000228982729640769	0.0089639452358809	1	36	FFPE-ATAC in FFPE liver
peak_56804	chr2	61024632	61024844	9.97388704241579	3.18662272432788	0.865097659382759	3.68354103119584	0.000230016238875714	0.00897559983999893	7	30.5	FFPE-ATAC in FFPE liver
peak_93379	chr7	120422223	120422665	9.97388704241579	3.18662272432788	0.865097659382759	3.68354103119584	0.000230016238875714	0.00897559983999893	14	63.5	FFPE-ATAC in FFPE liver
peak_100715	chr8	127657594	127658284	9.97388704241579	3.18662272432788	0.865097659382759	3.68354103119584	0.000230016238875714	0.00897559983999893	20.5	98.5	FFPE-ATAC in FFPE liver
peak_105641	chr9	106439782	106440443	9.97388704241579	3.18662272432788	0.865097659382759	3.68354103119584	0.000230016238875714	0.00897559983999893	17.5	95.5	FFPE-ATAC in FFPE liver
peak_33225	chr14	82661321	82661537	9.97418785339776	3.18665145920694	0.865425611133988	3.68217836196388	0.000231249525394848	0.00898886063478229	8	30.5	FFPE-ATAC in FFPE liver
peak_101042	chr8_random	66988	67246	9.97418785339776	3.18665145920694	0.865425611133988	3.68217836196388	0.000231249525394848	0.00898886063478229	8.5	37.5	FFPE-ATAC in FFPE liver
peak_104096	chr9	69439900	69440269	9.97418785339776	3.18665145920694	0.865425611133988	3.68217836196388	0.000231249525394848	0.00898886063478229	13.5	52.5	FFPE-ATAC in FFPE liver
peak_20300	chr12	9450206	9451972	9.97358623143382	3.18659386895219	0.865418348228311	3.68214271799969	0.000231281868168999	0.00898886063478229	54	254	FFPE-ATAC in FFPE liver
peak_43414	chr17	20784058	20784423	9.97358623143382	3.18659386895219	0.865418348228311	3.68214271799969	0.000231281868168999	0.00898886063478229	10.5	51.5	FFPE-ATAC in FFPE liver
peak_57248	chr2	71472201	71472486	9.97358623143382	3.18659386895219	0.865418348228311	3.68214271799969	0.000231281868168999	0.00898886063478229	8	41	FFPE-ATAC in FFPE liver
peak_82823	chr6	17305001	17305640	9.97358623143382	3.18659386895219	0.865418348228311	3.68214271799969	0.000231281868168999	0.00898886063478229	22	91	FFPE-ATAC in FFPE liver
peak_83666	chr6	37631210	37631709	9.47571168171038	3.56166697573464	0.967784782092699	3.68022626687003	0.000233027089385273	0.00903551834428734	15	68.5	FFPE-ATAC in FFPE liver
peak_75416	chr4	152837908	152838247	9.47420762680053	3.56151632353322	0.967767206831487	3.68013743221759	0.000233108285834023	0.00903551834428734	9.5	48	FFPE-ATAC in FFPE liver
peak_37852	chr15	93466928	93467208	9.47923516976994	3.56037434849334	0.967498272101971	3.67998005904251	0.000233252192890485	0.00903551834428734	6	39	FFPE-ATAC in FFPE liver
peak_74905	chr4	146826993	146827203	9.47923516976994	3.56037434849334	0.967498272101971	3.67998005904251	0.000233252192890485	0.00903551834428734	5.5	29	FFPE-ATAC in FFPE liver
peak_98440	chr8	87642250	87642454	9.97448866437973	3.18668030078707	0.866380895148979	3.67815162895427	0.000234930290293863	0.00908064131965515	7.5	29	FFPE-ATAC in FFPE liver
peak_24972	chr13	13026359	13026644	9.97328542045185	3.18656467419821	0.866366278614183	3.67808022179183	0.000234996055684866	0.00908064131965515	9	40.5	FFPE-ATAC in FFPE liver
peak_26915	chr13	52748770	52749129	9.97328542045185	3.18656467419821	0.866366278614183	3.67808022179183	0.000234996055684866	0.00908064131965515	10	52	FFPE-ATAC in FFPE liver
peak_101275	chr9	13217549	13217967	9.97328542045185	3.18656467419821	0.866366278614183	3.67808022179183	0.000234996055684866	0.00908064131965515	12.5	60	FFPE-ATAC in FFPE liver
peak_106931	chrUn_random	4322996	4323217	9.97861377440323	3.18554312760651	0.866763262809967	3.67521705670736	0.000237647284614679	0.00917340244454431	7	31.5	FFPE-ATAC in FFPE liver
peak_38089	chr15	97573253	97573542	9.97298460946988	3.18653488905343	0.86801407649082	3.67106360986201	0.000241543211060333	0.00928400660553802	10	41.5	FFPE-ATAC in FFPE liver
peak_91100	chr7	61901820	61902099	9.97298460946988	3.18653488905343	0.86801407649082	3.67106360986201	0.000241543211060333	0.00928400660553802	8	39.5	FFPE-ATAC in FFPE liver
peak_97563	chr8	71942754	71943042	9.97298460946988	3.18653488905343	0.86801407649082	3.67106360986201	0.000241543211060333	0.00928400660553802	11	40.5	FFPE-ATAC in FFPE liver
peak_45324	chr17	49737156	49737366	9.97801215243929	3.18545965058852	0.869444866263	3.66378568002832	0.000248514750720203	0.00944638767709418	7.5	29.5	FFPE-ATAC in FFPE liver
peak_54171	chr1_random	1080416	1080737	11.483198396239	5.50829895991772	1.50479615662536	3.66049510139007	0.000251728366879316	0.0095260226971314	3.5	57.5	FFPE-ATAC in FFPE liver
peak_95306	chr8	7884951	7885246	9.23084248254655	4.14600118437033	1.13289612851541	3.65964811778763	0.000252561825068586	0.00954504144703326	6.5	41	FFPE-ATAC in FFPE liver
peak_12172	chr10	107666697	107666945	9.23054167156458	4.14597106015378	1.1328932062932	3.65963096708763	0.000252578728592667	0.00954504144703326	4.5	34.5	FFPE-ATAC in FFPE liver
peak_77976	chr5	73942910	73943127	9.23054167156458	4.14597106015378	1.1328932062932	3.65963096708763	0.000252578728592667	0.00954504144703326	3.5	30	FFPE-ATAC in FFPE liver
peak_3394	chr1	104832619	104832840	11.483499207221	5.5083202586731	1.50531336198256	3.65925155372195	0.0002529529453209	0.0095472195342883	1.5	39.5	FFPE-ATAC in FFPE liver
peak_72171	chr4	105817175	105817879	11.4784716642516	5.50882810867913	1.50545698694657	3.65923978994071	0.00025296455628587	0.0095472195342883	7.5	126	FFPE-ATAC in FFPE liver
peak_109718	chrY_random	40763204	40763561	11.4784716642516	5.50882810867913	1.50545698694657	3.65923978994071	0.00025296455628587	0.0095472195342883	3.5	64.5	FFPE-ATAC in FFPE liver
peak_43673	chr17	25509365	25509781	9.23114329352852	4.14603134979438	1.13344815417319	3.6578923654596	0.00025429778948546	0.00957896467158412	6	57	FFPE-ATAC in FFPE liver
peak_91101	chr7	62186315	62186666	9.23024086058261	4.14594073670783	1.13343936253144	3.65784079304272	0.000254348949432668	0.00957896467158412	5.5	49	FFPE-ATAC in FFPE liver
peak_108684	chrX	108472083	108472488	9.23024086058261	4.14594073670783	1.13343936253144	3.65784079304272	0.000254348949432668	0.00957896467158412	7.5	56.5	FFPE-ATAC in FFPE liver
peak_61033	chr2	161168965	161169306	9.23144410451049	4.1460617944886	1.13455948990297	3.65433618191602	0.000257848233191834	0.00964453863291676	5.5	47.5	FFPE-ATAC in FFPE liver
peak_29224	chr13	110940875	110941516	9.22994004960064	4.14590997313977	1.13454475613644	3.65424982197987	0.00025793502906918	0.00964453863291676	7.5	91	FFPE-ATAC in FFPE liver
peak_107088	chrX	4780844	4781930	9.22994004960064	4.14590997313977	1.13454475613644	3.65424982197987	0.00025793502906918	0.00964453863291676	19.5	150	FFPE-ATAC in FFPE liver
peak_89976	chr7	28882367	28882569	9.22611575055912	4.14725011866426	1.13547244390961	3.65244453170932	0.000259755716609702	0.00968682537395193	3	27.5	FFPE-ATAC in FFPE liver
peak_82002	chr5	146617233	146617707	9.23174491549246	4.14609275209701	1.13625076498644	3.648924057839	0.000263340929963005	0.00979330305971161	8	65	FFPE-ATAC in FFPE liver
peak_73190	chr4	124575043	124575303	9.97238298750594	3.18647265940152	0.873453777673603	3.64812969026079	0.000264156295377161	0.0098117227646286	9.5	37.5	FFPE-ATAC in FFPE liver
peak_2525	chr1	82163669	82163952	9.37855228798875	-3.52695874465355	0.967030453739613	-3.64720545357637	0.000265107941453876	0.00981990668400995	78.5	3.5	FFPE-ATAC in frozen liver
peak_4079	chr1	132532733	132532970	9.88265762460948	-3.15329115843386	0.865892468188503	-3.64166599696927	0.000270879373063093	0.00995659465183011	65.5	3.5	FFPE-ATAC in frozen liver
peak_54989	chr2	23896119	23896802	9.88265762460948	-3.15329115843386	0.865892468188503	-3.64166599696927	0.000270879373063093	0.00995659465183011	190.5	11	FFPE-ATAC in frozen liver
peak_68337	chr4	3152590	3152792	9.2293384276367	4.14584617194448	1.13852660256938	3.64141352743826	0.000271145200831319	0.00995659465183011	4.5	28	FFPE-ATAC in FFPE liver
peak_670	chr1	33154984	33155358	9.87763008164007	-3.15280293953686	0.866155751244828	-3.63999538767213	0.000272642924600796	0.00995659465183011	105	6.5	FFPE-ATAC in frozen liver
peak_62553	chr3	14723274	14724275	9.87763008164007	-3.15280293953686	0.866155751244828	-3.63999538767213	0.000272642924600796	0.00995659465183011	282	19	FFPE-ATAC in frozen liver
peak_5914	chr1	168915763	168916381	5.49190989580287	5.91875107676207	1.62625456379958	3.63949851918232	0.000273169508405894	0.00995659465183011	2	52.5	FFPE-ATAC in FFPE liver
peak_20140	chr12	7425090	7425680	5.49190989580287	5.91875107676207	1.62625456379958	3.63949851918232	0.000273169508405894	0.00995659465183011	2.5	52.5	FFPE-ATAC in FFPE liver
peak_32852	chr14	72685916	72686150	5.49190989580287	5.91875107676207	1.62625456379958	3.63949851918232	0.000273169508405894	0.00995659465183011	0.5	20.5	FFPE-ATAC in FFPE liver
peak_34636	chr15	11638818	11639127	5.49190989580287	5.91875107676207	1.62625456379958	3.63949851918232	0.000273169508405894	0.00995659465183011	2	27.5	FFPE-ATAC in FFPE liver
peak_35069	chr15	32411122	32411399	5.49190989580287	5.91875107676207	1.62625456379958	3.63949851918232	0.000273169508405894	0.00995659465183011	1	24	FFPE-ATAC in FFPE liver
peak_45288	chr17	49145697	49146072	5.49190989580287	5.91875107676207	1.62625456379958	3.63949851918232	0.000273169508405894	0.00995659465183011	2	33.5	FFPE-ATAC in FFPE liver
peak_49754	chr18	66918532	66918850	5.49190989580287	5.91875107676207	1.62625456379958	3.63949851918232	0.000273169508405894	0.00995659465183011	1.5	28	FFPE-ATAC in FFPE liver
peak_55904	chr2	34776522	34776962	5.49190989580287	5.91875107676207	1.62625456379958	3.63949851918232	0.000273169508405894	0.00995659465183011	2	39	FFPE-ATAC in FFPE liver
peak_1658	chr1	59315003	59315325	5.49221070678484	5.91880743528587	1.62696017328123	3.63795471609418	0.000274811727367665	0.00995659465183011	1	28	FFPE-ATAC in FFPE liver
peak_42705	chr17	4515457	4515708	5.49221070678484	5.91880743528587	1.62696017328123	3.63795471609418	0.000274811727367665	0.00995659465183011	0.5	22	FFPE-ATAC in FFPE liver
peak_45287	chr17	49119985	49120320	5.49221070678484	5.91880743528587	1.62696017328123	3.63795471609418	0.000274811727367665	0.00995659465183011	0	30	FFPE-ATAC in FFPE liver
peak_50252	chr18	77606253	77606647	5.49221070678484	5.91880743528587	1.62696017328123	3.63795471609418	0.000274811727367665	0.00995659465183011	2	35.5	FFPE-ATAC in FFPE liver
peak_53271	chr19	46095128	46095557	5.49221070678484	5.91880743528587	1.62696017328123	3.63795471609418	0.000274811727367665	0.00995659465183011	1	38.5	FFPE-ATAC in FFPE liver
peak_64375	chr3	70004750	70005116	5.49221070678484	5.91880743528587	1.62696017328123	3.63795471609418	0.000274811727367665	0.00995659465183011	2.5	32	FFPE-ATAC in FFPE liver
peak_76994	chr5	40221966	40222354	5.49221070678484	5.91880743528587	1.62696017328123	3.63795471609418	0.000274811727367665	0.00995659465183011	1	32.5	FFPE-ATAC in FFPE liver
peak_108284	chrX	83790803	83791136	5.49221070678484	5.91880743528587	1.62696017328123	3.63795471609418	0.000274811727367665	0.00995659465183011	0.5	29.5	FFPE-ATAC in FFPE liver
peak_3076	chr1	92640025	92640410	5.4916090848209	5.91869468302482	1.6269648131046	3.63787503906164	0.000274896734313743	0.00995659465183011	2	34.5	FFPE-ATAC in FFPE liver
peak_29708	chr14	5071985	5072485	5.4916090848209	5.91869468302482	1.6269648131046	3.63787503906164	0.000274896734313743	0.00995659465183011	2.5	45	FFPE-ATAC in FFPE liver
peak_37991	chr15	96648600	96649063	5.4916090848209	5.91869468302482	1.6269648131046	3.63787503906164	0.000274896734313743	0.00995659465183011	1.5	40.5	FFPE-ATAC in FFPE liver
peak_45157	chr17	47298606	47299052	5.4916090848209	5.91869468302482	1.6269648131046	3.63787503906164	0.000274896734313743	0.00995659465183011	2	39.5	FFPE-ATAC in FFPE liver
peak_46750	chr17	85970961	85971196	5.4916090848209	5.91869468302482	1.6269648131046	3.63787503906164	0.000274896734313743	0.00995659465183011	1.5	20.5	FFPE-ATAC in FFPE liver
peak_83180	chr6	28948434	28948791	5.4916090848209	5.91869468302482	1.6269648131046	3.63787503906164	0.000274896734313743	0.00995659465183011	2	31.5	FFPE-ATAC in FFPE liver
peak_99759	chr8	114612643	114613186	5.4916090848209	5.91869468302482	1.6269648131046	3.63787503906164	0.000274896734313743	0.00995659465183011	0.5	48.5	FFPE-ATAC in FFPE liver
peak_105386	chr9	101501952	101502327	5.4916090848209	5.91869468302482	1.6269648131046	3.63787503906164	0.000274896734313743	0.00995659465183011	1	33	FFPE-ATAC in FFPE liver

## Sheet: README
Supplemental Table S4: List of differential accessible chromatin peaks between FFPE-ATAC on frozen mouse liver and FFPE-ATAC on FFPE mouse liver.
