# Supplementary material for: Profiling chromatin accessibility in formalin-fixed paraffin-embedded samples
Source: HighWire-hosted journal article supplement (doi:10.1101/gr.275269.121), 2021-07-14
Supplement: Supplemental_Table_S5.xlsx [file Supplemental_Table_S5.xlsx]

## Sheet: Supplemental_Table_S5
	chr	start	end	baseMean	log2FoldChange	lfcSE	stat	pvalue	padj	readcounts (standard ATAC in FFPE liver)	readcounts (FFPE-ATAC in FFPE liver)	Group
peak_39369	chr17	39979977	39985755	1374.86152948596	-3.63559647907731	0.0772159350272043	-47.0835000288015	0	0	149966	9292	standard ATAC in FFPE liver
peak_88492	chr9	3023339	3023722	131.03079876149	3.68130773675091	0.282115310223294	13.0489470204122	6.44317632208569e-39	7.74002663631349e-35	75	731.5	FFPE-ATAC in FFPE liver
peak_88489	chr9	3006673	3006873	156.964565232168	5.44547555807593	0.418502970752043	13.0117966624956	1.04847627816441e-38	1.11956296982396e-34	14.5	482.5	FFPE-ATAC in FFPE liver
peak_88494	chr9	3025352	3025927	123.779030642857	3.88361255064987	0.304336676094043	12.7609087425591	2.71020750104826e-37	2.6045636126574e-33	92	1047.5	FFPE-ATAC in FFPE liver
peak_88493	chr9	3024348	3024695	123.35282210446	3.82672243776944	0.302101274987201	12.6670184954749	9.00732886167612e-37	7.86929380240726e-33	56.5	629	FFPE-ATAC in FFPE liver
peak_88495	chr9	3032262	3032512	139.911585844036	5.52266766374893	0.454915791792806	12.1399779110422	6.48435401105852e-34	5.19299490975621e-30	14.5	538.5	FFPE-ATAC in FFPE liver
peak_88486	chr9	3001663	3002477	110.270129587742	4.70841700859608	0.403777178712705	11.6609289896153	2.01828189851275e-31	1.3854351929348e-27	69	1361.5	FFPE-ATAC in FFPE liver
peak_88485	chr9	3000016	3001595	112.534362770525	5.34163576193006	0.48137213497048	11.0966866876448	1.30180859109635e-28	8.34042728143611e-25	88	2727	FFPE-ATAC in FFPE liver
peak_50955	chr2	98503816	98504270	94.4564121983005	5.08216210755505	0.487593963878112	10.4229389288041	1.94837726031597e-25	1.10142912629932e-21	23	654	FFPE-ATAC in FFPE liver
peak_93648	chrUn_random	5495373	5497314	86.8623009559207	5.48605547963763	0.574714289863012	9.54570919220624	1.3517950067126e-21	6.49551018675472e-18	73.5	2592.5	FFPE-ATAC in FFPE liver
peak_67524	chr5	65193976	65195048	71.5513463151569	-3.0083151517663	0.3210369188145	-9.37062055938979	7.21073146361177e-21	3.29983673864771e-17	1393.5	134.5	standard ATAC in FFPE liver
peak_55222	chr3	30992928	30994270	62.0776154513661	-3.45194530781248	0.376275731945874	-9.17397805582908	4.55877888805056e-20	1.82544903624765e-16	1550	109	standard ATAC in FFPE liver
peak_93620	chrUn_random	5249057	5249768	64.4016999715301	4.50959099541327	0.505345992257058	8.92376918885181	4.50682540820782e-19	1.31246950115027e-15	37	691	FFPE-ATAC in FFPE liver
peak_51032	chr2	102498903	102499113	58.4385990772347	3.96334682475208	0.462619705196516	8.56718116464253	1.0604898185166e-17	2.37012075672285e-14	15.5	181.5	FFPE-ATAC in FFPE liver
peak_51031	chr2	102497963	102498173	57.2576949914539	4.05521081226699	0.478955600822965	8.46677814248154	2.52273954138381e-17	5.51000716831971e-14	13	179	FFPE-ATAC in FFPE liver
peak_51034	chr2	102501288	102502121	65.127616601738	5.28825202934676	0.627351993208257	8.42948151372377	3.47200117879439e-17	7.24060720714751e-14	26	834	FFPE-ATAC in FFPE liver
peak_88497	chr9	3035693	3036456	105.212731480791	7.00558977564937	0.848286486073643	8.25851866163195	1.47491409286689e-16	2.32364252709334e-13	13	1251	FFPE-ATAC in FFPE liver
peak_73153	chr6	47702689	47703385	54.2830121556105	5.01774761505097	0.636050126686058	7.88891850583285	3.04816481072909e-15	3.7080346157049e-12	23	576.5	FFPE-ATAC in FFPE liver
peak_51029	chr2	102492220	102492584	48.2220962961841	3.79045201849368	0.48933854079691	7.74607291778154	9.47780972549639e-15	1.071572317929e-11	25.5	256.5	FFPE-ATAC in FFPE liver
peak_88488	chr9	3004001	3004259	134.09208547009	7.94584571458746	1.02924098684902	7.72010230462481	1.16236372536529e-14	1.28397101994316e-11	3	541	FFPE-ATAC in FFPE liver
peak_24553	chr13	74665885	74669160	45.2824729978043	3.69294146256829	0.494359197662172	7.47015829791826	8.00984053888981e-14	7.06203390337971e-11	214	2161	FFPE-ATAC in FFPE liver
peak_88490	chr9	3014116	3014339	158.408234766765	10.6346354147709	1.44781827473206	7.34528331377705	2.05323713469607e-13	1.63074541420299e-10	0	555	FFPE-ATAC in FFPE liver
peak_88491	chr9	3020899	3021125	156.831125817009	10.6201855629101	1.44785271387784	7.33512840160771	2.21509014521308e-13	1.73068774906722e-10	0	557	FFPE-ATAC in FFPE liver
peak_51033	chr2	102499579	102500405	43.4812062940777	4.45488090494924	0.609954750150602	7.30362523424779	2.80115907310929e-13	2.11966133262952e-10	28.5	539	FFPE-ATAC in FFPE liver
peak_11756	chr11	3077166	3077486	42.6648113014112	4.04442642831328	0.554297325180379	7.2964927748788	2.95365700965642e-13	2.18347958416924e-10	17	202.5	FFPE-ATAC in FFPE liver
peak_73157	chr6	47721789	47722527	44.1141190354853	4.70809530674054	0.64834079249935	7.26176011321277	3.82085385858986e-13	2.71993850013483e-10	26.5	492	FFPE-ATAC in FFPE liver
peak_11740	chr11	3025603	3025804	42.0371120807929	3.85915862196796	0.535599654850454	7.20530453486846	5.79142668656429e-13	3.76059248265001e-10	11	124	FFPE-ATAC in FFPE liver
peak_73145	chr6	47622100	47622974	42.754141330318	4.6615997901289	0.650112809790613	7.17044752837634	7.47529937767653e-13	4.75755775359914e-10	31	563	FFPE-ATAC in FFPE liver
peak_51030	chr2	102493013	102493406	42.7570804182328	4.66167596264183	0.650547844628925	7.16576959116799	7.73507749627712e-13	4.85853867677924e-10	13	254	FFPE-ATAC in FFPE liver
peak_11764	chr11	3096037	3096264	42.7611567225848	4.66136463795754	0.650827008342978	7.16221757579712	7.93822948895032e-13	4.9218047119168e-10	7.5	146.5	FFPE-ATAC in FFPE liver
peak_48179	chr2	22442811	22443957	59.5666577470716	6.17599680896605	0.863642114009982	7.15110658544689	8.60811165797733e-13	5.26915125194228e-10	19	1057	FFPE-ATAC in FFPE liver
peak_90240	chr9	56071275	56071892	41.4481240233027	4.3821180386971	0.613786354836311	7.13948429151011	9.36817232453247e-13	5.48983023222534e-10	26	383.5	FFPE-ATAC in FFPE liver
peak_93462	chrM	12773	16234	128.127906359181	10.3285712558489	1.44956511510947	7.12528961147697	1.03862066733936e-12	5.94128115313374e-10	0	6964	FFPE-ATAC in FFPE liver
peak_93461	chrM	52	3352	126.997621139179	10.3157894118162	1.44965566213049	7.11602739967613	1.11082221796869e-12	6.24282086498405e-10	0	6588.5	FFPE-ATAC in FFPE liver
peak_93670	chrUn_random	5813093	5813514	41.8461307587557	4.62985409143007	0.651905144439615	7.10203644030137	1.22931804081946e-12	6.75085270621893e-10	15	265.5	FFPE-ATAC in FFPE liver
peak_80293	chr7	87547492	87547970	36.5887696400772	-3.77844115914012	0.532432299214699	-7.09656638921617	1.2789452381943e-12	6.94402233225701e-10	332	17.5	standard ATAC in FFPE liver
peak_11753	chr11	3068479	3068998	43.3866516272671	4.95619039606392	0.700775327600745	7.07243848471736	1.52234477283736e-12	8.08289377675229e-10	14.5	343.5	FFPE-ATAC in FFPE liver
peak_73149	chr6	47689638	47690407	46.2808695806576	5.38264249436064	0.767854089058583	7.00998089488584	2.38350669575789e-12	1.19301958581106e-09	15.5	548	FFPE-ATAC in FFPE liver
peak_48502	chr2	27532211	27532905	37.031615723403	-3.41994452638969	0.490753616536123	-6.96876072055997	3.19744984302826e-12	1.5677618612995e-09	481	35.5	standard ATAC in FFPE liver
peak_51028	chr2	102491654	102492030	39.3632856703118	4.53747772860377	0.655674054771118	6.92032526769373	4.50607805499833e-12	2.04265619453514e-09	13.5	222.5	FFPE-ATAC in FFPE liver
peak_51027	chr2	102490811	102491298	37.2363946218194	3.83577039801429	0.565031587725046	6.78859462257328	1.13231105592336e-11	4.55302749357097e-09	24.5	267.5	FFPE-ATAC in FFPE liver
peak_11757	chr11	3077794	3078010	37.3331424874516	4.45718701980605	0.659681047397726	6.75657886093366	1.41288093973786e-11	5.56478213404458e-09	7	121	FFPE-ATAC in FFPE liver
peak_73142	chr6	47609177	47609954	41.3118378713962	5.21415122602103	0.77427451447787	6.73424105859558	1.64787784087534e-11	6.3600143077832e-09	20	492.5	FFPE-ATAC in FFPE liver
peak_11759	chr11	3084672	3085100	36.6503456522439	4.43034466824685	0.661145667509767	6.70101141997032	2.06981863188131e-11	7.86220198265048e-09	15.5	235.5	FFPE-ATAC in FFPE liver
peak_48180	chr2	22444043	22445801	66.5252383705346	6.92853285190712	1.0423444676594	6.64706636517699	2.98992241898857e-11	1.10941129077081e-08	15.5	1822.5	FFPE-ATAC in FFPE liver
peak_11765	chr11	3098279	3098516	33.5360573663497	4.061034225274	0.629767296615857	6.44846794537687	1.12986453101186e-10	3.59543844898351e-08	9.5	118.5	FFPE-ATAC in FFPE liver
peak_42779	chr18	40467574	40468106	32.6229033909366	4.0194324657238	0.631148121559483	6.36844558103463	1.90953498364722e-10	5.75266868333747e-08	22	257.5	FFPE-ATAC in FFPE liver
peak_51026	chr2	102489357	102490588	32.1812931819717	3.99735526628105	0.631150877986568	6.33343849418859	2.39756909129122e-10	6.98215711549299e-08	48	587.5	FFPE-ATAC in FFPE liver
peak_20573	chr12	98299504	98300142	58.9813435494749	9.20930493049376	1.46075819332365	6.30446912609122	2.89183358384078e-10	8.27116044863889e-08	0	591.5	FFPE-ATAC in FFPE liver
peak_88487	chr9	3003322	3003644	140.376424311508	9.01486171441272	1.44602280543969	6.23424587807355	4.53959591566701e-10	1.19852815024019e-07	1	709	FFPE-ATAC in FFPE liver
peak_73152	chr6	47698328	47699029	54.2353212606321	9.08828191732174	1.46257166967299	6.21390534615903	5.16836683639638e-10	1.3327947988418e-07	1.5	598.5	FFPE-ATAC in FFPE liver
peak_41464	chr18	3004685	3006114	32.3072224092379	3.45058567368914	0.555990535964334	6.20619498082697	5.42828236283279e-10	1.39111677768789e-07	77	665	FFPE-ATAC in FFPE liver
peak_7171	chr10	21861972	21862977	30.8205807048257	3.93163709689117	0.634120476791022	6.20014215088479	5.64121856135031e-10	1.43801693947716e-07	36	457.5	FFPE-ATAC in FFPE liver
peak_42807	chr18	42717444	42718487	49.7149151526025	8.96273403393959	1.46470942701187	6.11912087725434	9.40930104736721e-10	2.26063162313521e-07	0	816	FFPE-ATAC in FFPE liver
peak_73155	chr6	47713084	47713797	49.0395361541203	8.94298134213165	1.46505983784684	6.10417479962794	1.0333314985137e-09	2.44594146970845e-07	0.5	551	FFPE-ATAC in FFPE liver
peak_89224	chr9	32163462	32164068	48.8095113414349	8.93622888751063	1.46528070545358	6.09864639195149	1.06970406491426e-09	2.51962500113702e-07	0	464.5	FFPE-ATAC in FFPE liver
peak_73156	chr6	47717544	47718104	47.4580185724918	8.89568487414679	1.46594792271056	6.06821343127834	1.29340948625603e-09	2.95950567733754e-07	0	418.5	FFPE-ATAC in FFPE liver
peak_54902	chr3	19766526	19767209	47.452875168641	8.89556829544245	1.46611430276016	6.0674452726471	1.29960880760741e-09	2.96662721208283e-07	0	511.5	FFPE-ATAC in FFPE liver
peak_73150	chr6	47690471	47690744	29.8239637592209	4.39425149402571	0.724337901379534	6.06657678088729	1.30665274307353e-09	2.97563843400124e-07	7	122	FFPE-ATAC in FFPE liver
peak_37966	chr17	13498697	13499263	45.9647750373858	6.3898270266433	1.05380884953938	6.06355415352255	1.33145922501393e-09	3.0196999576226e-07	5	403.5	FFPE-ATAC in FFPE liver
peak_39876	chr17	50080231	50080882	47.2279937598065	8.88870670550753	1.46613632242471	6.06267409759502	1.33876766153778e-09	3.02725293668479e-07	0	483.5	FFPE-ATAC in FFPE liver
peak_83753	chr8	19853125	19854018	29.7353685022928	3.66944439761693	0.606861996339542	6.04658788942168	1.47945541965071e-09	3.3141870568595e-07	38.5	387	FFPE-ATAC in FFPE liver
peak_48155	chr2	20821347	20821960	29.195862094144	4.08456799816831	0.675679442679275	6.04512693470702	1.49292416522518e-09	3.33658135177837e-07	20	266	FFPE-ATAC in FFPE liver
peak_73144	chr6	47617793	47618360	45.6494152660928	8.83963499123466	1.46698788650492	6.02570414694763	1.68374937715919e-09	3.69433065396695e-07	0	405.5	FFPE-ATAC in FFPE liver
peak_88496	chr9	3034767	3035331	113.712970189203	8.71022101755665	1.44803890630012	6.01518438466003	1.79682061351375e-09	3.87170526008742e-07	3	1004.5	FFPE-ATAC in FFPE liver
peak_46309	chr19	40582819	40583485	45.1974481324877	8.82527990388792	1.46726779667234	6.01477107580704	1.80141087067838e-09	3.87291247190008e-07	0	472.5	FFPE-ATAC in FFPE liver
peak_75242	chr6	100236721	100237865	29.7035191110454	-3.06848456884781	0.510268777171642	-6.01346722771487	1.81596656606757e-09	3.88681556641928e-07	622	57	standard ATAC in FFPE liver
peak_37800	chr17	9223557	9224216	44.7410723670104	8.81067422372492	1.4677748841698	6.00274219074706	1.94012550421576e-09	4.0798674224539e-07	1	463	FFPE-ATAC in FFPE liver
peak_72516	chr6	29697621	29699126	44.5191300460907	8.80346696067587	1.46768846255575	5.99818502718622	1.99535092770869e-09	4.1569477896199e-07	4.5	1056	FFPE-ATAC in FFPE liver
peak_73146	chr6	47626444	47627172	44.5169257301546	8.80341361448879	1.46774041271652	5.9979363777245	1.99840781545066e-09	4.1569477896199e-07	0	508.5	FFPE-ATAC in FFPE liver
peak_12348	chr11	20836393	20836891	33.5748386464162	5.33381194964232	0.890004193122208	5.99301889908054	2.05980902695469e-09	4.257027249643e-07	8.5	256.5	FFPE-ATAC in FFPE liver
peak_55317	chr3	35579274	35579996	44.2927790932988	8.79611611116636	1.46783025154381	5.9925976467067	2.06515357017998e-09	4.25891391419391e-07	0	500.5	FFPE-ATAC in FFPE liver
peak_11766	chr11	3099019	3099292	30.2737376940044	3.34792748630386	0.561279186162778	5.96481674154387	2.44908753187189e-09	4.92389560644252e-07	14.5	118	FFPE-ATAC in FFPE liver
peak_73143	chr6	47613445	47614191	43.161759101318	8.75880761859705	1.46859806531437	5.96406043659203	2.46045665130509e-09	4.92614177299421e-07	0	505.5	FFPE-ATAC in FFPE liver
peak_10064	chr10	91850673	91851305	42.7097919677129	8.74362093672278	1.46890695040448	5.95246753670485	2.64129538112562e-09	5.2593033797781e-07	0	425.5	FFPE-ATAC in FFPE liver
peak_73147	chr6	47630760	47631480	42.4819714709637	8.73592044233004	1.46920826379415	5.946005517128	2.74764889641155e-09	5.41445792412073e-07	0	478.5	FFPE-ATAC in FFPE liver
peak_73141	chr6	47604767	47605496	42.0336781972521	8.72058407365095	1.46937331193973	5.93490027536901	2.94024159625748e-09	5.73640498841973e-07	2	481.5	FFPE-ATAC in FFPE liver
peak_42167	chr18	24835534	24836138	42.031473881316	8.72052745181481	1.46939849934035	5.93476000943903	2.94275629985945e-09	5.73640498841973e-07	0	398	FFPE-ATAC in FFPE liver
peak_93454	chr9_random	241909	243675	41.5824458356257	8.70500655488615	1.46973273739481	5.9228500076254	3.16409418768978e-09	6.1059393499069e-07	6	1157.5	FFPE-ATAC in FFPE liver
peak_93536	chrUn_random	3919754	3919969	41.5839153795831	8.70504485605686	1.46987736315739	5.92229329755639	3.1748273339796e-09	6.11437387675567e-07	0	140.5	FFPE-ATAC in FFPE liver
peak_13380	chr11	53953449	53954312	29.1046489597067	4.69293535914269	0.793915168559867	5.91112948207741	3.39769808868955e-09	6.47868217696912e-07	16	382	FFPE-ATAC in FFPE liver
peak_83735	chr8	19702979	19703179	29.3269347252611	3.46439931187683	0.586231205700967	5.90961258661485	3.42913241979882e-09	6.52567294668329e-07	9	85	FFPE-ATAC in FFPE liver
peak_77354	chr6	145881158	145881673	28.3787323294989	3.59665547863415	0.610877735394003	5.88768467116317	3.91643444732376e-09	7.35111686048259e-07	23	212	FFPE-ATAC in FFPE liver
peak_62774	chr4	106583545	106584372	28.8855733403686	-3.02331165410729	0.514005513067308	-5.88186620035609	4.05666227465182e-09	7.55529763408118e-07	433	41.5	standard ATAC in FFPE liver
peak_89223	chr9	32162022	32163395	39.9979891660824	8.64898226582381	1.47087036151893	5.8801798527589	4.09820936743036e-09	7.60215335324116e-07	0	863.5	FFPE-ATAC in FFPE liver
peak_29278	chr14	99863885	99864424	39.9950500781676	8.64890243326318	1.4712089380901	5.87877235472145	4.13320318183617e-09	7.62397489790441e-07	0	338.5	FFPE-ATAC in FFPE liver
peak_83771	chr8	19929736	19930198	27.1623773789104	3.97402632060139	0.680979740095812	5.83574824126524	5.35497024967092e-09	9.63216327893544e-07	17	186	FFPE-ATAC in FFPE liver
peak_19837	chr12	80360198	80360735	38.190120631662	8.58225482101738	1.47228020473969	5.82922652453566	5.56848717505504e-09	9.96541442266554e-07	0	321.5	FFPE-ATAC in FFPE liver
peak_37499	chr17	3077737	3078018	29.1497330942905	3.28724062466537	0.564029951691035	5.82813131609376	5.60514664769914e-09	1.0012375522996e-06	15	116.5	FFPE-ATAC in FFPE liver
peak_93537	chrUn_random	3921933	3922703	37.7403578139931	8.5651425477207	1.4726540112385	5.81612685828181	6.02267669698932e-09	1.06591395199644e-06	2	457	FFPE-ATAC in FFPE liver
peak_67406	chr5	60433909	60434443	37.5103330013077	8.55636112927754	1.47301589401435	5.80873645969916	6.29460810706973e-09	1.0998625969193e-06	0	314.5	FFPE-ATAC in FFPE liver
peak_8929	chr10	71759786	71760226	37.2869211364306	8.54771822266509	1.47298714562831	5.80298222427394	6.51457002670083e-09	1.12586603129474e-06	0	258	FFPE-ATAC in FFPE liver
peak_64836	chr4	140258246	140258889	24.2949780404733	-3.63658756717407	0.62709941100385	-5.7990607284301	6.66873811587676e-09	1.14238693478073e-06	294.5	17.5	standard ATAC in FFPE liver
peak_88498	chr9	3036676	3038297	91.7944011393025	8.40045974468579	1.45060064001256	5.79102167265901	6.9959548007959e-09	1.18785379552312e-06	9	2332.5	FFPE-ATAC in FFPE liver
peak_54584	chr2	181651987	181652886	26.9770231392357	3.72599951980573	0.644259401308713	5.78338400997632	7.32126745017892e-09	1.23436569210017e-06	31	356	FFPE-ATAC in FFPE liver
peak_37498	chr17	3077121	3077335	26.7118797892627	3.94832548619468	0.682882293875485	5.78185365414469	7.38819680445824e-09	1.2434684576218e-06	8	84.5	FFPE-ATAC in FFPE liver
peak_68611	chr5	99186115	99186675	35.7054035548021	8.48518751760939	1.4743023701424	5.75539162755998	8.64411619748607e-09	1.42246036782672e-06	1	315	FFPE-ATAC in FFPE liver
peak_83776	chr8	19974830	19975240	27.2480446650382	3.53365618295383	0.614469525744323	5.75074277064175	8.88522147026875e-09	1.45714599613612e-06	18.5	161	FFPE-ATAC in FFPE liver
peak_76999	chr6	140640952	140641535	35.4783178300315	8.4759939121955	1.47452453269064	5.74828951589494	9.01507799607373e-09	1.47191339102613e-06	0	324	FFPE-ATAC in FFPE liver
peak_83770	chr8	19927579	19927779	29.1881230470129	3.13792318077197	0.548159027431903	5.72447597091118	1.03753490857592e-08	1.65931070976679e-06	13	82	FFPE-ATAC in FFPE liver
peak_93683	chrUn_random	5890117	5890599	34.1246207451523	8.41984654326147	1.4757001033013	5.70566236623915	1.15891522781042e-08	1.83181038195784e-06	1	259.5	FFPE-ATAC in FFPE liver
peak_93570	chrUn_random	4526125	4526339	33.894595932467	8.41013163594057	1.4761154864233	5.69747537594007	1.21594536973515e-08	1.91251688907181e-06	0	113.5	FFPE-ATAC in FFPE liver
peak_44467	chr18	90771301	90772128	26.3935809300549	4.54612130540581	0.799940054668356	5.68307747421219	1.3229230264787e-08	2.04397988248644e-06	22	329	FFPE-ATAC in FFPE liver
peak_24628	chr13	77578023	77578455	33.2184821620061	8.38104342711836	1.4764790651772	5.67637132471803	1.37581958493319e-08	2.11550422001999e-06	1	226	FFPE-ATAC in FFPE liver
peak_95856	chrX	166443134	166443556	28.6131546569419	5.09618382026011	0.898030230084932	5.67484662490497	1.38812970069398e-08	2.1310230111197e-06	6	184.5	FFPE-ATAC in FFPE liver
peak_93588	chrUn_random	4763247	4763696	32.7687193443371	8.36135238216591	1.47689779997743	5.66142923518045	1.50117410275312e-08	2.27916641074996e-06	0	232	FFPE-ATAC in FFPE liver
peak_93681	chrUn_random	5888548	5888986	32.766515028401	8.36127972508227	1.47688664162372	5.66142281298563	1.50123029489992e-08	2.27916641074996e-06	1	224.5	FFPE-ATAC in FFPE liver
peak_93572	chrUn_random	4528241	4528844	32.5416336195665	8.3513319790159	1.47705746601009	5.65403321888009	1.56725900196422e-08	2.36818749381707e-06	0	308.5	FFPE-ATAC in FFPE liver
peak_93653	chrUn_random	5553018	5553255	32.316752210732	8.34131515051756	1.47731559136298	5.6462648869913	1.63971144890652e-08	2.45833930831224e-06	0	121	FFPE-ATAC in FFPE liver
peak_73404	chr6	51663416	51663899	32.0896664859614	8.33115412812474	1.47747922210304	5.63876229424477	1.71276776278059e-08	2.5519443029262e-06	1	243.5	FFPE-ATAC in FFPE liver
peak_6696	chr10	10054984	10055505	31.8640503051482	8.32097081382192	1.47770084300481	5.63102528716282	1.79141456787492e-08	2.65267369494476e-06	0	261	FFPE-ATAC in FFPE liver
peak_46907	chr19	47900863	47901430	31.8603764452547	8.32084608569647	1.47807417826473	5.62951860471929	1.80713280092036e-08	2.65955706637133e-06	1	283.5	FFPE-ATAC in FFPE liver
peak_88457	chr8_random	676754	677234	26.1211009774095	3.46668234771911	0.617129336998894	5.61743242442114	1.93815935646413e-08	2.82641867185002e-06	21.5	180	FFPE-ATAC in FFPE liver
peak_25651	chr13	111399499	111399994	31.4120831715431	8.30036073831535	1.47813876479044	5.6154137460106	1.96092456630741e-08	2.85096479079084e-06	0	245	FFPE-ATAC in FFPE liver
peak_93669	chrUn_random	5810984	5811350	31.1842626747938	8.28988070775511	1.47842880526963	5.60722347820003	2.05598120539003e-08	2.96672531231821e-06	0	180.5	FFPE-ATAC in FFPE liver
peak_41466	chr18	3008582	3008847	25.0745999380047	4.13174861696011	0.737786638569522	5.60019442066756	2.14111530150881e-08	3.07571693132436e-06	6	99.5	FFPE-ATAC in FFPE liver
peak_93619	chrUn_random	5245167	5245492	30.9586464939806	8.27940079780122	1.47862147815088	5.59940520284826	2.15088512390256e-08	3.0840688267447e-06	0	158.5	FFPE-ATAC in FFPE liver
peak_25155	chr13	99264954	99266078	30.7337650851461	8.26886994512012	1.47880947413941	5.59157220028779	2.25022686901341e-08	3.21324372311927e-06	1	542.5	FFPE-ATAC in FFPE liver
peak_73148	chr6	47634999	47636353	30.7322955411887	8.26881840344891	1.47888566728764	5.59124926716909	2.25441662496229e-08	3.21445024469029e-06	0	655.5	FFPE-ATAC in FFPE liver
peak_72036	chr6	9839799	9840302	34.2128947916748	5.95792300929867	1.06589907594895	5.58957517060839	2.27625813279667e-08	3.24078457893372e-06	6	267.5	FFPE-ATAC in FFPE liver
peak_19613	chr12	75904751	75905616	30.5074141323542	8.25820974770634	1.47904452552881	5.58347609227905	2.35758200174022e-08	3.34171601078523e-06	0	415.5	FFPE-ATAC in FFPE liver
peak_83746	chr8	19759576	19760358	30.2832674954984	8.24754861530481	1.4793701820619	5.57504045661486	2.47472347133168e-08	3.45699208097653e-06	0	372	FFPE-ATAC in FFPE liver
peak_93573	chrUn_random	4531428	4531973	30.2832674954984	8.24754861530481	1.4793701820619	5.57504045661486	2.47472347133168e-08	3.45699208097653e-06	1	260	FFPE-ATAC in FFPE liver
peak_50056	chr2	69193446	69193872	30.2803284075836	8.24744404351646	1.47935437330786	5.57502934545361	2.4748814298473e-08	3.45699208097653e-06	2	202.5	FFPE-ATAC in FFPE liver
peak_93503	chrUn_random	3558812	3559211	30.0561817707278	8.23670274577708	1.47952103726299	5.56714135069983	2.58952331594781e-08	3.58420205999504e-06	0	189	FFPE-ATAC in FFPE liver
peak_93535	chrUn_random	3916534	3916906	30.0561817707278	8.23670274577708	1.47952103726299	5.56714135069983	2.58952331594781e-08	3.58420205999504e-06	1	175.5	FFPE-ATAC in FFPE liver
peak_93513	chrUn_random	3632165	3632598	30.0547122267704	8.23665010346645	1.47955692193917	5.56697074734453	2.59205888711635e-08	3.58420205999504e-06	0	204.5	FFPE-ATAC in FFPE liver
peak_19277	chr12	68160050	68160964	29.8298308179359	8.22580128857504	1.47975439108891	5.55889635341571	2.71485848074684e-08	3.73252259966714e-06	1	426.5	FFPE-ATAC in FFPE liver
peak_93604	chrUn_random	5171685	5171886	29.832035133872	8.22588093952086	1.47996661238631	5.558153049316	2.72644267517859e-08	3.74309419957161e-06	0	94	FFPE-ATAC in FFPE liver
peak_88458	chr8_random	679933	680325	29.6042146371227	8.21484353818533	1.48000601464656	5.55054740108412	2.84776481074274e-08	3.89297146290183e-06	0	182	FFPE-ATAC in FFPE liver
peak_37977	chr17	13743494	13746078	72.809174767494	8.06520471506299	1.45412636513699	5.54642629996133	2.91567443011016e-08	3.96325522040236e-06	15	2947	FFPE-ATAC in FFPE liver
peak_41465	chr18	3006211	3006503	29.3771289123521	8.20374811348246	1.4802643958074	5.54208297971511	2.98894595794007e-08	4.05139188222787e-06	0	135	FFPE-ATAC in FFPE liver
peak_93567	chrUn_random	4521552	4521810	29.1522475035176	8.19264802458975	1.48050384139556	5.53368913711643	3.13564510943668e-08	4.22639223432096e-06	0	118	FFPE-ATAC in FFPE liver
peak_93657	chrUn_random	5557521	5557881	29.1493084156029	8.19253942421141	1.48076664637565	5.53263368287206	3.15457844981345e-08	4.24595655719849e-06	1	165.5	FFPE-ATAC in FFPE liver
peak_93680	chrUn_random	5883810	5884025	28.9258965507258	8.1814072361311	1.48074977844041	5.52517876771058	3.29150291234858e-08	4.38343917307299e-06	0	98	FFPE-ATAC in FFPE liver
peak_93684	chrUn_random	5893651	5894263	28.9258965507258	8.1814072361311	1.48074977844041	5.52517876771058	3.29150291234858e-08	4.38343917307299e-06	1	277.5	FFPE-ATAC in FFPE liver
peak_93566	chrUn_random	4520415	4520771	28.9266313227044	8.18143454366091	1.48077745515896	5.52509393977951	3.29309364249394e-08	4.38343917307299e-06	0	162	FFPE-ATAC in FFPE liver
peak_6518	chr10	6104534	6105229	28.9251617787471	8.18137992992543	1.48076926885265	5.52508760278677	3.29321250646053e-08	4.38343917307299e-06	0	318	FFPE-ATAC in FFPE liver
peak_65862	chr4_random	142921	143432	28.2490480082862	8.14723348816979	1.4815934898551	5.49896685153939	3.82022935692452e-08	5.02232122652751e-06	1	227.5	FFPE-ATAC in FFPE liver
peak_93531	chrUn_random	3907172	3907962	28.0219622835156	8.1356036150859	1.48179942885865	5.49035413068848	4.0112865715633e-08	5.22347780623816e-06	1	348	FFPE-ATAC in FFPE liver
peak_83769	chr8	19926316	19927137	28.0256361434091	8.13574504393995	1.48244816033463	5.48804690890741	4.06402154077928e-08	5.28498779583181e-06	1.5	363.5	FFPE-ATAC in FFPE liver
peak_93677	chrUn_random	5881299	5881886	27.7970808746811	8.12396439785367	1.48213439357856	5.48126029127404	4.22306624510726e-08	5.47555571710217e-06	2	256.5	FFPE-ATAC in FFPE liver
peak_31716	chr15	64870602	64871255	27.794876558745	8.12387926004426	1.48212173862611	5.48124964928649	4.22332031734652e-08	5.47555571710217e-06	0	284.5	FFPE-ATAC in FFPE liver
peak_93509	chrUn_random	3572821	3573181	27.5707299218892	8.11217327326402	1.48237597863941	5.47241279551072	4.43949234609426e-08	5.69618282302203e-06	1	156	FFPE-ATAC in FFPE liver
peak_93589	chrUn_random	4764489	4765002	27.5677908339744	8.11205876131417	1.48256596680109	5.47163427663016	4.45904297191189e-08	5.71363930248902e-06	0	222.5	FFPE-ATAC in FFPE liver
peak_88460	chr8_random	682492	683360	27.3443789690973	8.10028500354525	1.48263345882607	5.46344408682033	4.66984403694893e-08	5.93626126506436e-06	0	375	FFPE-ATAC in FFPE liver
peak_54548	chr2	181162616	181163250	27.1180280163054	8.0882979706233	1.4829074929353	5.45435100244393	4.915202823206e-08	6.21527396994398e-06	1	270.5	FFPE-ATAC in FFPE liver
peak_84949	chr8	56206703	56207078	26.8924118354922	8.07623979715284	1.48320309815485	5.4451341203372	5.17663654468201e-08	6.51158540859988e-06	1	158	FFPE-ATAC in FFPE liver
peak_93676	chrUn_random	5880587	5881165	26.8938813794496	8.07629845392145	1.48337446809027	5.44454460263094	5.19380891038396e-08	6.51612824942193e-06	1	243	FFPE-ATAC in FFPE liver
peak_15392	chr11	88942891	88943494	26.6660608827003	8.06405046022218	1.48348483438596	5.43588331562554	5.45256299719411e-08	6.7834071310614e-06	1	251.5	FFPE-ATAC in FFPE liver
peak_66459	chr5	28445351	28445788	26.6653261107216	8.06402093716063	1.48350802763985	5.43577842985446	5.45577173402929e-08	6.7834071310614e-06	1.5	182.5	FFPE-ATAC in FFPE liver
peak_93622	chrUn_random	5251009	5251324	26.6638565667642	8.06396174920517	1.48371988457312	5.43496237601832	5.48079959202319e-08	6.79218832941261e-06	0	132	FFPE-ATAC in FFPE liver
peak_93621	chrUn_random	5250568	5250896	26.2126242051378	8.03932838568198	1.48418356317285	5.41666717322736	6.07202176911134e-08	7.32905530967231e-06	0	134.5	FFPE-ATAC in FFPE liver
peak_93533	chrUn_random	3910854	3911339	25.988477568282	8.02691264432644	1.48439113546924	5.40754552659667	6.38943047526857e-08	7.64662848440086e-06	1	197.5	FFPE-ATAC in FFPE liver
peak_93540	chrUn_random	3927749	3928539	25.9877427963033	8.02688238895708	1.48438669846827	5.40754130796238	6.38958092634128e-08	7.64662848440086e-06	0	323.5	FFPE-ATAC in FFPE liver
peak_47249	chr19	57187776	57188206	25.9870080243246	8.02685211559824	1.48444012929266	5.40732627554543	6.39725427302064e-08	7.64662848440086e-06	1	175.5	FFPE-ATAC in FFPE liver
peak_83775	chr8	19974078	19974397	24.9874631079195	4.89538721969968	0.906281666594857	5.4016178414962	6.60425313889301e-08	7.84526495863901e-06	4	121.5	FFPE-ATAC in FFPE liver
peak_93592	chrUn_random	4770245	4771496	25.7621266154901	8.01429749816231	1.48468917963985	5.39796316162714	6.74017019711731e-08	7.98697701952364e-06	2	507	FFPE-ATAC in FFPE liver
peak_93685	chrUn_random	5896435	5897501	25.7621266154901	8.01429749816231	1.48468917963985	5.39796316162714	6.74017019711731e-08	7.98697701952364e-06	0	430	FFPE-ATAC in FFPE liver
peak_93532	chrUn_random	3909474	3909856	25.5372452066556	8.00163263671828	1.48507513432733	5.38803219565226	7.12332939660717e-08	8.36877997154941e-06	0	154	FFPE-ATAC in FFPE liver
peak_93534	chrUn_random	3916051	3916391	25.5372452066556	8.00163263671828	1.48507513432733	5.38803219565226	7.12332939660717e-08	8.36877997154941e-06	0	137.5	FFPE-ATAC in FFPE liver
peak_83774	chr8	19968413	19969242	25.5335713467621	8.00147850961239	1.48535219996087	5.38692339084505	7.16739656505335e-08	8.40364076772217e-06	3	330.5	FFPE-ATAC in FFPE liver
peak_93501	chrUn_random	3556479	3556836	25.3094247099063	7.98873141005113	1.48534338229879	5.37837344903194	7.51617855738255e-08	8.74479166733146e-06	0	142.5	FFPE-ATAC in FFPE liver
peak_82429	chr7	137977805	137978290	24.3076865946797	3.35386986541224	0.624368354601008	5.3716205196778	7.8032188170069e-08	8.99166588431651e-06	21	168.5	FFPE-ATAC in FFPE liver
peak_33518	chr15	98768038	98768624	25.0845433010718	7.97583905444376	1.48564848946495	5.36859096280319	7.93541652158689e-08	9.1112233997317e-06	0	231	FFPE-ATAC in FFPE liver
peak_83745	chr8	19757933	19758237	25.0874823889866	7.97596487044761	1.48628687285337	5.36636972049372	8.0337180069629e-08	9.20210212044277e-06	0	119.5	FFPE-ATAC in FFPE liver
peak_95850	chrX	166427272	166427674	29.6939582276026	5.75000669440129	1.07182252494953	5.36470036834882	8.10837058627926e-08	9.27655512003107e-06	4	184	FFPE-ATAC in FFPE liver
peak_4932	chr1	167689607	167690000	24.8574575763012	7.96273570136815	1.48599103351205	5.3585354970472	8.3899254039096e-08	9.5418770552251e-06	1	154	FFPE-ATAC in FFPE liver
peak_93682	chrUn_random	5889479	5889819	29.4661377308533	5.7387116810355	1.072264026702	5.3519576691258	8.70077553281248e-08	9.84878598650583e-06	2	155	FFPE-ATAC in FFPE liver
peak_88467	chr8_random	727641	728432	24.631841395488	7.94957598196869	1.48630027421152	5.34856658503	8.86535604332398e-08	9.99974702436058e-06	0	305	FFPE-ATAC in FFPE liver
peak_84947	chr8	56200116	56200530	24.6333109394454	7.94963969015238	1.4863735723788	5.34834569039718	8.87618072052004e-08	1.00002194560776e-05	2	160.5	FFPE-ATAC in FFPE liver
peak_8204	chr10	57690823	57691054	24.6362500273602	7.94976823491942	1.48729205362536	5.34512923372475	9.03525653045354e-08	1.01675201766938e-05	0	89	FFPE-ATAC in FFPE liver
peak_93568	chrUn_random	4523902	4524689	24.4076947586322	7.93635940426955	1.48676958022683	5.33798882477722	9.39832502206636e-08	1.0479074050948e-05	2	304	FFPE-ATAC in FFPE liver
peak_93538	chrUn_random	3922782	3923243	24.4047556707175	7.93623080058755	1.48675098814155	5.33796907746328	9.39934843386943e-08	1.0479074050948e-05	0	177	FFPE-ATAC in FFPE liver
peak_93616	chrUn_random	5241300	5241638	24.1806090338617	7.92289080794512	1.48698076648398	5.32817302450998	9.92055958466757e-08	1.09860405939158e-05	0	128.5	FFPE-ATAC in FFPE liver
peak_93635	chrUn_random	5335242	5335607	24.179874261883	7.92285839911962	1.4869760857882	5.32816800138379	9.92083388987187e-08	1.09860405939158e-05	0	139	FFPE-ATAC in FFPE liver
peak_93584	chrUn_random	4747026	4747536	24.1813438058404	7.92292324076991	1.48705179784358	5.32794032612663	9.93327459649843e-08	1.09860405939158e-05	1	193	FFPE-ATAC in FFPE liver
peak_93645	chrUn_random	5488212	5488547	24.1791394899043	7.92282596901836	1.48703775681945	5.32792522091982	9.93410051415459e-08	1.09860405939158e-05	0	127	FFPE-ATAC in FFPE liver
peak_6600	chr10	7675536	7676693	23.0704593640662	-3.04982387239884	0.572961002006992	-5.32291702527011	1.02116331730695e-07	1.12283566498664e-05	487.5	46.5	standard ATAC in FFPE liver
peak_93602	chrUn_random	5168959	5169277	23.9549928530485	7.90936079702589	1.48735393121516	5.31773953127889	1.05064324033785e-07	1.15136394506549e-05	0	119.5	FFPE-ATAC in FFPE liver
peak_93603	chrUn_random	5169468	5169986	23.9535233090911	7.9092953864825	1.48734450512932	5.31772925452454	1.05070256583884e-07	1.15136394506549e-05	0	194	FFPE-ATAC in FFPE liver
peak_66678	chr5	33080243	33080443	22.5536972243584	4.30871058135126	0.810911355826252	5.31341749057273	1.07588161740327e-07	1.1749360817692e-05	4	67	FFPE-ATAC in FFPE liver
peak_19067	chr12	55814913	55815545	22.3705473006197	3.95635177827113	0.744865120906622	5.31150092442992	1.08726019200938e-07	1.18601451728133e-05	17	210	FFPE-ATAC in FFPE liver
peak_33945	chr16	3349898	3350461	23.7286419002566	7.89566967170995	1.48767690194828	5.30738204066333	1.11210928584284e-07	1.20378751906013e-05	0	211	FFPE-ATAC in FFPE liver
peak_73158	chr6	47722810	47723139	23.7286419002566	7.89566967170995	1.48767690194828	5.30738204066333	1.11210928584284e-07	1.20378751906013e-05	0.5	123	FFPE-ATAC in FFPE liver
peak_70348	chr5	127400549	127401044	23.7279071282779	7.89563667636223	1.48767215580965	5.30737679368954	1.11214128845885e-07	1.20378751906013e-05	0	186	FFPE-ATAC in FFPE liver
peak_95862	chrX	166527080	166527628	23.7279071282779	7.89563667636223	1.48767215580965	5.30737679368954	1.11214128845885e-07	1.20378751906013e-05	1	203.5	FFPE-ATAC in FFPE liver
peak_79512	chr7	67027888	67028113	23.7293766722353	7.8957026920162	1.48775040925779	5.30714200640361	1.11357422784588e-07	1.20378751906013e-05	0	84	FFPE-ATAC in FFPE liver
peak_93544	chrUn_random	4058769	4059021	23.7264375843205	7.89557057198168	1.48786905598839	5.30663000228651	1.11670525918218e-07	1.20446250076235e-05	0	94	FFPE-ATAC in FFPE liver
peak_83763	chr8	19897196	19897497	23.7337853041074	7.89590388536499	1.48964863879858	5.30051428216866	1.15476931291769e-07	1.23306267233351e-05	0	112.5	FFPE-ATAC in FFPE liver
peak_84946	chr8	56199160	56199556	23.5030257194434	7.88188069742607	1.48806146501752	5.29674404096827	1.17885755441831e-07	1.24883753266763e-05	0	146.5	FFPE-ATAC in FFPE liver
peak_89983	chr9	50166140	50166630	23.501556175486	7.88181409230386	1.48805190608558	5.29673330619057	1.17892682863153e-07	1.24883753266763e-05	1	180	FFPE-ATAC in FFPE liver
peak_93506	chrUn_random	3567550	3568026	23.501556175486	7.88181409230386	1.48805190608558	5.29673330619057	1.17892682863153e-07	1.24883753266763e-05	1	176	FFPE-ATAC in FFPE liver
peak_59604	chr4	3016690	3018306	23.5037604914221	7.88191405014765	1.48817130162792	5.29637551908547	1.18123797339793e-07	1.24883753266763e-05	4	599.5	FFPE-ATAC in FFPE liver
peak_66200	chr5	20484333	20485337	23.5037604914221	7.88191405014765	1.48817130162792	5.29637551908547	1.18123797339793e-07	1.24883753266763e-05	2.5	369.5	FFPE-ATAC in FFPE liver
peak_93636	chrUn_random	5336561	5337293	23.2766747666515	7.86792502497839	1.48839412263218	5.28618388459113	1.24894350827221e-07	1.31179850771386e-05	0	267.5	FFPE-ATAC in FFPE liver
peak_11735	chr11	3003778	3004135	23.2759399946728	7.86789142178893	1.48838930906742	5.286178403632	1.24898091044742e-07	1.31179850771386e-05	0	131	FFPE-ATAC in FFPE liver
peak_22439	chr13	25142147	25142663	23.0495890418809	7.85379913707657	1.48878086790779	5.27532245098882	1.32522861733952e-07	1.37828826221483e-05	0	187	FFPE-ATAC in FFPE liver
peak_84952	chr8	56208237	56208493	23.051793357817	7.85390095460183	1.48890439141819	5.2749531802515	1.32789984927575e-07	1.37828826221483e-05	0	93.5	FFPE-ATAC in FFPE liver
peak_93647	chrUn_random	5490453	5490817	23.051793357817	7.85390095460183	1.48890439141819	5.2749531802515	1.32789984927575e-07	1.37828826221483e-05	0	132	FFPE-ATAC in FFPE liver
peak_93590	chrUn_random	4765576	4765856	23.0488542699022	7.8537651671286	1.48888500185368	5.27493067453201	1.32806281951565e-07	1.37828826221483e-05	0	101.5	FFPE-ATAC in FFPE liver
peak_69588	chr5	117017192	117017691	23.0525281297957	7.85393502981276	1.48909106745491	5.27431478266563	1.33253018288908e-07	1.38143274688249e-05	0	181.5	FFPE-ATAC in FFPE liver
peak_84950	chr8	56207316	56207551	23.0539976737531	7.85400367630643	1.48968426064129	5.27226062852097	1.34753530404548e-07	1.39398103110203e-05	0	85.5	FFPE-ATAC in FFPE liver
peak_84953	chr8	56208605	56209001	22.8239728610677	7.83960210264326	1.4891284099295	5.26455747561382	1.40527432359993e-07	1.44172308734742e-05	0	143	FFPE-ATAC in FFPE liver
peak_79514	chr7	67034274	67034485	22.8254424050251	7.83967059672402	1.48921216614317	5.26430738007437	1.40718846218797e-07	1.44172308734742e-05	0	75.5	FFPE-ATAC in FFPE liver
peak_87849	chr8	124235603	124236010	22.8225033171103	7.83953351145674	1.48934074110834	5.26376086752499	1.41138004739749e-07	1.44379303260478e-05	1.5	146	FFPE-ATAC in FFPE liver
peak_83768	chr8	19924128	19925162	27.8875592371396	5.65770071514836	1.07486214981788	5.26365238194216	1.41221353421208e-07	1.44379303260478e-05	9	443	FFPE-ATAC in FFPE liver
peak_54634	chr3	8245210	8246661	21.9171106230572	3.92491722886073	0.745922266693954	5.26183143219009	1.42627502629499e-07	1.45661936851223e-05	35	466	FFPE-ATAC in FFPE liver
peak_43144	chr18	54858566	54859160	22.5983566802545	7.82526394670683	1.48949951064904	5.25361968282689	1.49138684740239e-07	1.51460768227546e-05	1	211.5	FFPE-ATAC in FFPE liver
peak_34624	chr16	18533154	18533558	22.5990914522332	7.82529851144391	1.48954211624406	5.25349261770169	1.49241660422224e-07	1.51460768227546e-05	0	144	FFPE-ATAC in FFPE liver
peak_93654	chrUn_random	5554197	5554950	22.5976219082758	7.82522938334557	1.48953227921917	5.25348090304403	1.49251157636143e-07	1.51460768227546e-05	0	265.5	FFPE-ATAC in FFPE liver
peak_79511	chr7	67024145	67024361	22.5998262242119	7.82533312999811	1.48966015898278	5.25309956288396	1.49560634091473e-07	1.51614726344501e-05	0	76.5	FFPE-ATAC in FFPE liver
peak_93587	chrUn_random	4755325	4755676	22.602030540148	7.82543782048097	1.49046946321991	5.25031744265019	1.51837318071824e-07	1.53693538600267e-05	0	124.5	FFPE-ATAC in FFPE liver
peak_66677	chr5	33076621	33076873	22.6837027559767	3.45518128662773	0.658524946896315	5.24684949736878	1.54722190178072e-07	1.56326858444719e-05	9	82.5	FFPE-ATAC in FFPE liver
peak_86074	chr8	88023346	88023831	21.8731748220253	4.26229054654087	0.812638057186488	5.24500484422026	1.56278221085757e-07	1.57593385128892e-05	11.5	158.5	FFPE-ATAC in FFPE liver
peak_89219	chr9	32094311	32094942	22.1471243186281	7.79615287387734	1.49031705402503	5.23120422786652	1.68409324516478e-07	1.67552222045177e-05	0	220	FFPE-ATAC in FFPE liver
peak_61817	chr4	79648516	79649390	22.1456547746707	7.79608241241435	1.49030707132636	5.23119198882679	1.68420476676491e-07	1.67552222045177e-05	1	304.5	FFPE-ATAC in FFPE liver
peak_84948	chr8	56205676	56206272	22.1456547746707	7.79608241241435	1.49030707132636	5.23119198882679	1.68420476676491e-07	1.67552222045177e-05	2	208	FFPE-ATAC in FFPE liver
peak_93558	chrUn_random	4258499	4259148	22.1456547746707	7.79608241241435	1.49030707132636	5.23119198882679	1.68420476676491e-07	1.67552222045177e-05	1	227.5	FFPE-ATAC in FFPE liver
peak_55847	chr3	56379257	56379796	21.9193038218788	7.78126728500662	1.49075092578513	5.21969642977649	1.79216644501935e-07	1.76105091717024e-05	1	187	FFPE-ATAC in FFPE liver
peak_93656	chrUn_random	5557046	5557367	26.9828901979507	5.60917485244644	1.07624434794086	5.21180423681507	1.87012837048777e-07	1.82645403110382e-05	2	134	FFPE-ATAC in FFPE liver
peak_93600	chrUn_random	5167197	5167412	26.984027414388	5.60855259803434	1.07673327053723	5.20885975338719	1.90004658242059e-07	1.84867886283888e-05	2	89.5	FFPE-ATAC in FFPE liver
peak_19068	chr12	55819821	55820873	21.695157185023	7.76640626502026	1.49111635321217	5.20845086856557	1.90423757514828e-07	1.85036440290091e-05	0.5	359	FFPE-ATAC in FFPE liver
peak_88448	chr8_random	390944	391789	21.4644087174735	3.89282219212535	0.747528570482712	5.20758984450799	1.91309214997221e-07	1.85709072521848e-05	23	267.5	FFPE-ATAC in FFPE liver
peak_11734	chr11	3002643	3002987	21.6973615009591	7.76651461477899	1.49174342338702	5.20633407395558	1.92607759298473e-07	1.86404742035265e-05	0	118	FFPE-ATAC in FFPE liver
peak_73151	chr6	47693978	47694686	52.924492877286	7.60280536876188	1.46048828410057	5.20565995053085	1.93308354646475e-07	1.86894562356495e-05	5	587.5	FFPE-ATAC in FFPE liver
peak_83737	chr8	19717038	19717243	21.6988310449165	7.76658787721079	1.4925738110701	5.20348663470286	1.95583825029916e-07	1.88808869939296e-05	0	70.5	FFPE-ATAC in FFPE liver
peak_95855	chrX	166436826	166437118	26.9810883264732	5.608418285226	1.0781095800343	5.20208556633691	1.97064450772971e-07	1.89572450932773e-05	3	121.5	FFPE-ATAC in FFPE liver
peak_51845	chr2	124958990	124959401	21.4688062322311	7.7512816063209	1.49149177919483	5.19699921544679	2.02531217712795e-07	1.93214289325073e-05	0	139	FFPE-ATAC in FFPE liver
peak_93649	chrUn_random	5547285	5548166	21.4688062322311	7.7512816063209	1.49149177919483	5.19699921544679	2.02531217712795e-07	1.93214289325073e-05	0	297.5	FFPE-ATAC in FFPE liver
peak_82572	chr7	140680710	140680989	21.4673366882737	7.75120903393041	1.49156458403143	5.19669688923578	2.02860729151317e-07	1.93214289325073e-05	0	94	FFPE-ATAC in FFPE liver
peak_93651	chrUn_random	5549231	5549574	21.4673366882737	7.75120903393041	1.49156458403143	5.19669688923578	2.02860729151317e-07	1.93214289325073e-05	0	115.5	FFPE-ATAC in FFPE liver
peak_83734	chr8	19700152	19700529	21.466601916295	7.7511726470604	1.49172566854314	5.19611132965916	2.03500416585992e-07	1.93631653809377e-05	0	127	FFPE-ATAC in FFPE liver
peak_19069	chr12	55830033	55831123	21.2417205074605	7.73596009270158	1.49193074790135	5.18520052193004	2.15782569757175e-07	2.04508249692348e-05	0	363	FFPE-ATAC in FFPE liver
peak_93500	chrUn_random	3554134	3554348	21.2417205074605	7.73596009270158	1.49193074790135	5.18520052193004	2.15782569757175e-07	2.04508249692348e-05	0	71	FFPE-ATAC in FFPE liver
peak_33931	chr16	3116155	3116715	21.2439248233966	7.73607008356319	1.49207324608476	5.18477903404732	2.16271124206243e-07	2.04769335748457e-05	0	187	FFPE-ATAC in FFPE liver
peak_59601	chr4	3008401	3008625	26.5316578363243	5.58433098547211	1.07720224630422	5.18410633159317	2.17053081275813e-07	2.05011492561074e-05	2	92	FFPE-ATAC in FFPE liver
peak_93686	chrUn_random	5898424	5898804	21.2402509635031	7.73588657224873	1.49225958260323	5.18400864195057	2.17166863777209e-07	2.05011492561074e-05	0	126.5	FFPE-ATAC in FFPE liver
peak_61125	chr4	55545129	55546062	21.4844519165126	-3.0887914700248	0.596397688960195	-5.17908021308741	2.22982581976125e-07	2.09677809129839e-05	365	34.5	standard ATAC in FFPE liver
peak_73656	chr6	55580626	55581141	21.016839098626	7.72058521903408	1.49232824894176	5.17351676784844	2.29728496076599e-07	2.14977358920934e-05	0	169.5	FFPE-ATAC in FFPE liver
peak_73107	chr6	44742799	44743366	21.0161043266473	7.72054821330245	1.49232306475178	5.17350994275934	2.29736891648247e-07	2.14977358920934e-05	0	188	FFPE-ATAC in FFPE liver
peak_79513	chr7	67030570	67030784	21.0190434145621	7.72069667365232	1.4928629869429	5.17173829157813	2.31926262953606e-07	2.16814958388788e-05	0	70.5	FFPE-ATAC in FFPE liver
peak_88031	chr8	126118733	126118964	21.0131652387325	7.72039928678588	1.49316881725404	5.17047985303082	2.33493647113002e-07	2.18068090134633e-05	0	76	FFPE-ATAC in FFPE liver
peak_93608	chrUn_random	5176968	5177337	20.7904881458341	7.70496988280068	1.49274288545216	5.16161889491558	2.44823318532828e-07	2.27170449584091e-05	0	120.5	FFPE-ATAC in FFPE liver
peak_93618	chrUn_random	5242795	5243138	20.7904881458341	7.70496988280068	1.49274288545216	5.16161889491558	2.44823318532828e-07	2.27170449584091e-05	0	112.5	FFPE-ATAC in FFPE liver
peak_33946	chr16	3351085	3351894	20.7912229178128	7.70500727492833	1.49279217449457	5.16147351692617	2.45013556697236e-07	2.27170449584091e-05	1	264	FFPE-ATAC in FFPE liver
peak_88032	chr8	126124830	126125228	20.7919576897915	7.70504473152138	1.49292968179925	5.16102320521582	2.45603730534089e-07	2.27170449584091e-05	0	130	FFPE-ATAC in FFPE liver
peak_93556	chrUn_random	4252368	4253505	20.7919576897915	7.70504473152138	1.49292968179925	5.16102320521582	2.45603730534089e-07	2.27170449584091e-05	3	371	FFPE-ATAC in FFPE liver
peak_93615	chrUn_random	5240137	5240525	20.7919576897915	7.70504473152138	1.49292968179925	5.16102320521582	2.45603730534089e-07	2.27170449584091e-05	0	127.5	FFPE-ATAC in FFPE liver
peak_74532	chr6	87407132	87408137	20.7926924617702	7.70508231488624	1.49315567721361	5.16026723299527	2.46597589098437e-07	2.27651503434563e-05	4	330	FFPE-ATAC in FFPE liver
peak_78165	chr7	25648156	25649021	20.7926924617702	7.70508231488624	1.49315567721361	5.16026723299527	2.46597589098437e-07	2.27651503434563e-05	0	283.5	FFPE-ATAC in FFPE liver
peak_32963	chr15	86025159	86025813	21.0165178882204	3.8594843569988	0.749112880239758	5.15207315052913	2.57622501814603e-07	2.36240817455983e-05	20	203.5	FFPE-ATAC in FFPE liver
peak_93625	chrUn_random	5256125	5256532	20.5648719650209	7.689221473646	1.49319164869658	5.14952081359283	2.61152794372536e-07	2.38576619512276e-05	0	132	FFPE-ATAC in FFPE liver
peak_93633	chrUn_random	5332254	5332562	20.5641371930422	7.68918370468144	1.49318638281002	5.14951367973985	2.61162726818291e-07	2.38576619512276e-05	0	99.5	FFPE-ATAC in FFPE liver
peak_93607	chrUn_random	5176050	5176252	20.5678110529357	7.68937352384542	1.49411522093468	5.1464394553421	2.65477093397073e-07	2.42057681495688e-05	0	65	FFPE-ATAC in FFPE liver
peak_93674	chrUn_random	5872437	5873836	20.338521012229	7.67326106736603	1.49361967209942	5.13735940326801	2.78625777057002e-07	2.51387932638256e-05	1	449	FFPE-ATAC in FFPE liver
peak_93560	chrUn_random	4261596	4261959	20.3392557842077	7.67329923861976	1.49367088851251	5.13720880391618	2.7884907306027e-07	2.51387932638256e-05	0	116	FFPE-ATAC in FFPE liver
peak_84951	chr8	56207943	56208161	20.3399905561864	7.67333747750748	1.49381402027659	5.13674217362528	2.79542050972077e-07	2.51666302560082e-05	0	70	FFPE-ATAC in FFPE liver
peak_88029	chr8	126098311	126098579	20.3414601001438	7.6734144183227	1.49437741013388	5.13485707578731	2.82358519466257e-07	2.53600172315385e-05	0	86.5	FFPE-ATAC in FFPE liver
peak_93505	chrUn_random	3565270	3565572	20.3421948721225	7.67345324575449	1.49479885698175	5.13343531801226	2.84500833848085e-07	2.55285706204189e-05	0	96.5	FFPE-ATAC in FFPE liver
peak_11732	chr11	3000321	3000648	25.6288607855514	5.53261158054827	1.07908150405371	5.12714893153508	2.94162814588896e-07	2.62485002856287e-05	3	129	FFPE-ATAC in FFPE liver
peak_83883	chr8	24205806	24206376	20.1143743753732	7.65723800755822	1.49437534588756	5.12403930420192	2.99058600159225e-07	2.66358939689545e-05	0	181.5	FFPE-ATAC in FFPE liver
peak_93626	chrUn_random	5262691	5263467	20.1151091473519	7.65727687897346	1.4946628416805	5.12307971098293	3.00585200625283e-07	2.67223302039694e-05	0	246	FFPE-ATAC in FFPE liver
peak_93507	chrUn_random	3569978	3570297	19.886553878624	7.64083963476912	1.49452508781046	5.11255361123664	3.17832743282231e-07	2.80455263158424e-05	0	100	FFPE-ATAC in FFPE liver
peak_21605	chr12	116852373	116853030	19.8872886506026	7.64087861758039	1.49457835121376	5.11239749416626	3.18095603465778e-07	2.80455263158424e-05	1	205	FFPE-ATAC in FFPE liver
peak_93585	chrUn_random	4750766	4751108	19.8850843346666	7.64076160355243	1.49470588794153	5.11188298995402	3.18963380056523e-07	2.80962591660788e-05	0	107	FFPE-ATAC in FFPE liver
peak_8202	chr10	57686563	57687545	19.88875819456	7.6409568651304	1.49497274259861	5.11110112405706	3.20286473192905e-07	2.81354393480663e-05	2	308	FFPE-ATAC in FFPE liver
peak_93557	chrUn_random	4257576	4257996	19.88875819456	7.6409568651304	1.49497274259861	5.11110112405706	3.20286473192905e-07	2.81354393480663e-05	0	132	FFPE-ATAC in FFPE liver
peak_88034	chr8	126135597	126135884	19.8909625104961	7.64107594416316	1.4962921407409	5.10667384804923	3.27878955067498e-07	2.87236311211456e-05	0	90.5	FFPE-ATAC in FFPE liver
peak_89037	chr9	24346309	24346746	25.1742868915517	5.50696578517252	1.07947615875782	5.10151682415063	3.36942062226546e-07	2.94907159053694e-05	4	169	FFPE-ATAC in FFPE liver
peak_83756	chr8	19862362	19862662	19.6602029258321	7.62433183913896	1.49499851243866	5.09989259233578	3.39846275889341e-07	2.96908243686522e-05	0	92.5	FFPE-ATAC in FFPE liver
peak_61818	chr4	79649492	79650261	19.6594681538534	7.62429241295471	1.49509089934057	5.0995510816884	3.40459982374225e-07	2.97174252735039e-05	1	238	FFPE-ATAC in FFPE liver
peak_93650	chrUn_random	5548250	5549153	19.6624072417682	7.62445019703965	1.49530851188011	5.09891446244303	3.41606866331713e-07	2.97696440493732e-05	0	281	FFPE-ATAC in FFPE liver
peak_93499	chrUn_random	3553588	3553788	19.6587333818747	7.62425288106389	1.49528133675017	5.09887517063135	3.41677773474627e-07	2.97696440493732e-05	0	62	FFPE-ATAC in FFPE liver
peak_694	chr1	37624174	37624561	19.4345867450189	7.60767281675184	1.49546240315491	5.08717089824678	3.63444307871749e-07	3.13309189294073e-05	1	118.5	FFPE-ATAC in FFPE liver
peak_93586	chrUn_random	4754425	4754909	19.4353215169976	7.60771264606239	1.4955178341395	5.08700897601785	3.63754624565842e-07	3.13309189294073e-05	0	148.5	FFPE-ATAC in FFPE liver
peak_83738	chr8	19719077	19719927	24.9472011667811	5.49362126593326	1.07994044476595	5.08696687169993	3.6383535748703e-07	3.13309189294073e-05	10	324	FFPE-ATAC in FFPE liver
peak_95866	chrX	166612409	166613215	19.4375258329337	7.60783287019106	1.49628600128121	5.08447774267537	3.68638991854524e-07	3.16877856844396e-05	1	245	FFPE-ATAC in FFPE liver
peak_19338	chr12	70754914	70755463	21.1531252505325	4.64536604859213	0.915347247562045	5.07497680357339	3.87543275711271e-07	3.31528211629015e-05	7.5	174	FFPE-ATAC in FFPE liver
peak_61189	chr4	57155800	57156240	19.6939445818848	-3.30588135435137	0.651459076410302	-5.07458023697755	3.88352337134304e-07	3.31528211629015e-05	162	12.5	standard ATAC in FFPE liver
peak_87113	chr8	112660098	112660758	19.2089705642057	7.59081915006099	1.49596167696155	5.07420695794741	3.89115377068327e-07	3.31528211629015e-05	0	199.5	FFPE-ATAC in FFPE liver
peak_88030	chr8	126110188	126110424	19.2089705642057	7.59081915006099	1.49596167696155	5.07420695794741	3.89115377068327e-07	3.31528211629015e-05	0	71.5	FFPE-ATAC in FFPE liver
peak_24965	chr13	95626963	95627476	19.208235792227	7.59077889316738	1.49595616663095	5.07419873823081	3.89132195706155e-07	3.31528211629015e-05	0	155.5	FFPE-ATAC in FFPE liver
peak_81190	chr7	111576369	111576748	19.208235792227	7.59077889316738	1.49595616663095	5.07419873823081	3.89132195706155e-07	3.31528211629015e-05	0	114.5	FFPE-ATAC in FFPE liver
peak_61647	chr4	64158743	64159245	19.2075010202483	7.59073859991412	1.49605279931886	5.07384405374605	3.89858596115266e-07	3.31852885773864e-05	0	150.5	FFPE-ATAC in FFPE liver
peak_93623	chrUn_random	5254600	5255105	19.2104401081631	7.59089985601392	1.49627937346629	5.07318351814795	3.91214874309151e-07	3.32712671246531e-05	1	153	FFPE-ATAC in FFPE liver
peak_93672	chrUn_random	5816676	5816962	19.2111748801418	7.59094045350376	1.49659230738923	5.07214985405475	3.93346439441967e-07	3.33934448085264e-05	0	86.5	FFPE-ATAC in FFPE liver
peak_88028	chr8	126091551	126091819	19.2119096521205	7.59098130979072	1.49700888261768	5.07076571016538	3.96218302530324e-07	3.36075651454273e-05	0	81	FFPE-ATAC in FFPE liver
peak_83764	chr8	19899423	19899634	21.5626372441776	3.3742980938515	0.666022415574255	5.06634313642751	4.05530631111995e-07	3.42207491838431e-05	8	65.5	FFPE-ATAC in FFPE liver
peak_32030	chr15	75409238	75409943	18.9811500674564	7.57364402857171	1.49663834169189	5.06043699241997	4.18296673519603e-07	3.52006540442915e-05	1	210.5	FFPE-ATAC in FFPE liver
peak_84957	chr8	57990752	57991033	18.9804152954777	7.57360308648959	1.49689440372703	5.05954399163529	4.20260314344275e-07	3.52836629103399e-05	0	83.5	FFPE-ATAC in FFPE liver
peak_88027	chr8	126067722	126068076	18.7570034306006	7.55646814517452	1.49696196410662	5.04786916859587	4.4676490938503e-07	3.72376420830183e-05	0	105.5	FFPE-ATAC in FFPE liver
peak_19070	chr12	55835350	55835996	18.758472974558	7.55655067253655	1.49729370574485	5.04680587619074	4.49257400012978e-07	3.73805494857551e-05	0	192	FFPE-ATAC in FFPE liver
peak_93617	chrUn_random	5241758	5242104	18.758472974558	7.55655067253655	1.49729370574485	5.04680587619074	4.49257400012978e-07	3.73805494857551e-05	0	102	FFPE-ATAC in FFPE liver
peak_93502	chrUn_random	3557451	3557726	18.5313872497874	7.53900180308663	1.49752250844057	5.03431618596325	4.79557578604247e-07	3.9593163590228e-05	0	80	FFPE-ATAC in FFPE liver
peak_95865	chrX	166610864	166611231	18.5313872497874	7.53900180308663	1.49752250844057	5.03431618596325	4.79557578604247e-07	3.9593163590228e-05	0	107.5	FFPE-ATAC in FFPE liver
peak_93638	chrUn_random	5341133	5342139	18.5321220217661	7.53904352820981	1.49769202063853	5.03377425019305	4.80915976631939e-07	3.96372102798307e-05	0	294	FFPE-ATAC in FFPE liver
peak_93637	chrUn_random	5338944	5339460	18.5328567937448	7.53908541680154	1.49797126968365	5.03286382681671	4.83206371502136e-07	3.97918583668366e-05	0	151	FFPE-ATAC in FFPE liver
peak_8207	chr10	57695876	57696395	18.5350611096809	7.53921283387407	1.49947615678342	5.02789777601179	4.95886088042817e-07	4.06965370052014e-05	0	152.5	FFPE-ATAC in FFPE liver
peak_93624	chrUn_random	5255632	5255984	18.3050362969955	7.52127923904349	1.49800703239981	5.0208570963745	5.1441420983592e-07	4.19306483406714e-05	0	101	FFPE-ATAC in FFPE liver
peak_95864	chrX	166579742	166581018	18.3050362969955	7.52127923904349	1.49800703239981	5.0208570963745	5.1441420983592e-07	4.19306483406714e-05	0	366	FFPE-ATAC in FFPE liver
peak_83748	chr8	19772304	19772910	18.3057710689742	7.52132139362713	1.49812441569007	5.02049183289134	5.15393425848955e-07	4.1957377950362e-05	2	176	FFPE-ATAC in FFPE liver
peak_69704	chr5	119009889	119011073	19.1385354007862	-3.26105293452945	0.649559195880894	-5.02040915625404	5.15615318717379e-07	4.1957377950362e-05	420.5	32.5	standard ATAC in FFPE liver
peak_94670	chrX	72994880	72995276	18.3028319810594	7.52115269968907	1.49832547710041	5.0197055410445	5.17507458148601e-07	4.2075720594752e-05	0	113.5	FFPE-ATAC in FFPE liver
peak_84549	chr8	41747853	41748208	20.4762767080929	4.59650726399879	0.917626820726616	5.00912479907582	5.46781103409566e-07	4.40090097151307e-05	7.5	110	FFPE-ATAC in FFPE liver
peak_54586	chr2	181663755	181664151	18.080154888161	7.50342161553453	1.49877009419405	5.00638599916116	5.54614839124243e-07	4.45648789878913e-05	1	114	FFPE-ATAC in FFPE liver
peak_79508	chr7	67004433	67004820	18.080154888161	7.50342161553453	1.49877009419405	5.00638599916116	5.54614839124243e-07	4.45648789878913e-05	0	109.5	FFPE-ATAC in FFPE liver
peak_95891	chrY	1936999	1937382	18.0764810282675	7.50320812067986	1.49902805426611	5.0053820536089	5.5751341796472e-07	4.47603629851675e-05	0	108.5	FFPE-ATAC in FFPE liver
peak_93610	chrUn_random	5183266	5183484	18.0757462562888	7.50316499879412	1.4994245781885	5.00402961772102	5.61441251910728e-07	4.50380861361643e-05	0	61.5	FFPE-ATAC in FFPE liver
peak_59942	chr4	11975644	11976332	17.8530691633904	7.48521053062557	1.4990992204149	4.99313883210073	5.94058221420984e-07	4.72992404266773e-05	1	193.5	FFPE-ATAC in FFPE liver
peak_57240	chr3	96050187	96050656	17.851599619433	7.48512427518116	1.49920474196458	4.99272985581178	5.9531798566143e-07	4.73603055116182e-05	2	132	FFPE-ATAC in FFPE liver
peak_34284	chr16	10975051	10975390	20.2451146789702	4.58036738218196	0.918306657962102	4.98784076372338	6.1057860933046e-07	4.83959672046869e-05	5.5	104.5	FFPE-ATAC in FFPE liver
peak_11733	chr11	3001105	3002496	17.6267182105985	7.46681047281494	1.49964587874603	4.97904910661876	6.38974302063956e-07	5.03131355726482e-05	4	386	FFPE-ATAC in FFPE liver
peak_87111	chr8	112630343	112630717	17.6274529825772	7.46685410686126	1.49971156678939	4.97886011697998	6.39598468414254e-07	5.03131355726482e-05	0	104	FFPE-ATAC in FFPE liver
peak_93583	chrUn_random	4741898	4742186	17.6274529825772	7.46685410686126	1.49971156678939	4.97886011697998	6.39598468414254e-07	5.03131355726482e-05	0	80.5	FFPE-ATAC in FFPE liver
peak_83121	chr7	151319840	151320373	17.6259834386198	7.46676684008552	1.49969997484037	4.97884041164987	6.39663582011305e-07	5.03131355726482e-05	0	148.5	FFPE-ATAC in FFPE liver
peak_75596	chr6	114290997	114292111	17.6281877545559	7.46689783346384	1.49989721499998	4.97827301683731	6.4154120413189e-07	5.03704189538259e-05	3	311.5	FFPE-ATAC in FFPE liver
peak_88473	chr8_random	776054	776305	17.6289225265346	7.46694174263896	1.50020335282606	4.97728639825583	6.44818776461051e-07	5.05451664400163e-05	0	69	FFPE-ATAC in FFPE liver
peak_93611	chrUn_random	5184541	5184978	17.630392070492	7.46703045634683	1.50118100031264	4.9741040252919	6.55501042039301e-07	5.11322736542702e-05	0	121	FFPE-ATAC in FFPE liver
peak_93652	chrUn_random	5552408	5552643	42.5285140323903	7.2854620620985	1.46647793354648	4.96799978740872	6.76470369138354e-07	5.25972131188787e-05	1	155.5	FFPE-ATAC in FFPE liver
peak_19429	chr12	72117622	72117891	19.6444629325434	-3.11422849569374	0.626904379754201	-4.96762918918318	6.77764050848924e-07	5.26551987184182e-05	96	9	standard ATAC in FFPE liver
peak_72420	chr6	28481537	28482162	17.4003672578066	7.44817274453831	1.50023514292227	4.96467022498234	6.88179036073732e-07	5.32544288267285e-05	1	172	FFPE-ATAC in FFPE liver
peak_83739	chr8	19729320	19729655	17.4003672578066	7.44817274453831	1.50023514292227	4.96467022498234	6.88179036073732e-07	5.32544288267285e-05	0	92.5	FFPE-ATAC in FFPE liver
peak_93548	chrUn_random	4074260	4074494	17.4025715737427	7.44830543456093	1.50062123577665	4.96348129493586	6.92407125862767e-07	5.34611552294261e-05	0	64	FFPE-ATAC in FFPE liver
peak_29511	chr14	106730536	106730922	17.3988977138492	7.44808421262169	1.50059203621994	4.96343045467823	6.92588481619899e-07	5.34611552294261e-05	0	105.5	FFPE-ATAC in FFPE liver
peak_84747	chr8	47566537	47566738	17.3981629418705	7.44803964562214	1.50095588871216	4.96219755799263	6.97000471028243e-07	5.37585387373646e-05	0.5	55	FFPE-ATAC in FFPE liver
peak_93561	chrUn_random	4262207	4262728	17.1747510769934	7.42933581761205	1.50081260211924	4.95020884494265	7.41338859513684e-07	5.66512089048737e-05	0	140	FFPE-ATAC in FFPE liver
peak_24967	chr13	95720542	95721397	17.1754858489721	7.42938052271269	1.50088133721023	4.95001192867259	7.42089330833687e-07	5.66512089048737e-05	0	230.5	FFPE-ATAC in FFPE liver
peak_95863	chrX	166578616	166579304	17.1754858489721	7.42938052271269	1.50088133721023	4.95001192867259	7.42089330833687e-07	5.66512089048737e-05	0	185	FFPE-ATAC in FFPE liver
peak_31849	chr15	71567318	71568713	17.1740163050147	7.42929111380639	1.50086956571956	4.94999118077563	7.42168446143014e-07	5.66512089048737e-05	0	379.5	FFPE-ATAC in FFPE liver
peak_93632	chrUn_random	5331601	5332072	17.1762206209508	7.42942532579962	1.50107596644652	4.9493999583427	7.44426297121899e-07	5.67686107800642e-05	1	127	FFPE-ATAC in FFPE liver
peak_93629	chrUn_random	5322735	5323592	17.1769553929295	7.42947032225312	1.50139707749615	4.94837137597409	7.4837018528701e-07	5.68536533964049e-05	0	231	FFPE-ATAC in FFPE liver
peak_24314	chr13	66815010	66815536	17.1791597088656	7.42960738366329	1.50313116048704	4.94275388533357	7.70266979464104e-07	5.83327007568631e-05	0	142.5	FFPE-ATAC in FFPE liver
peak_54585	chr2	181653237	181653974	16.9491348961802	7.41024964422796	1.50143489185346	4.93544520940253	7.99681287708583e-07	6.0129869658095e-05	0	195.5	FFPE-ATAC in FFPE liver
peak_88449	chr8_random	393557	393878	16.9491348961802	7.41024964422796	1.50143489185346	4.93544520940253	7.99681287708583e-07	6.0129869658095e-05	0	85.5	FFPE-ATAC in FFPE liver
peak_55688	chr3	51569888	51570873	16.9484001242015	7.41020439637129	1.50142895963144	4.9354345730685	7.99724872646238e-07	6.0129869658095e-05	0	259.5	FFPE-ATAC in FFPE liver
peak_21449	chr12	113535297	113536212	16.9498696681589	7.41029494325602	1.50156969958607	4.93503228341567	8.01375032141117e-07	6.0129869658095e-05	0	244	FFPE-ATAC in FFPE liver
peak_93508	chrUn_random	3571229	3571788	16.9498696681589	7.41029494325602	1.50156969958607	4.93503228341567	8.01375032141117e-07	6.0129869658095e-05	0	149.5	FFPE-ATAC in FFPE liver
peak_93628	chrUn_random	5321601	5322445	16.9498696681589	7.41029494325602	1.50156969958607	4.93503228341567	8.01375032141117e-07	6.0129869658095e-05	2	225.5	FFPE-ATAC in FFPE liver
peak_93646	chrUn_random	5489205	5489677	16.9476653522228	7.41015909988614	1.50155190328115	4.93500030448076	8.01506347755715e-07	6.0129869658095e-05	0	125	FFPE-ATAC in FFPE liver
peak_62101	chr4	88430836	88431152	16.9469305802441	7.41011365549869	1.50180413653614	4.93414119406399	8.05041894167772e-07	6.03480000883863e-05	0	84	FFPE-ATAC in FFPE liver
peak_84796	chr8	47963777	47963996	19.4345978621334	3.73927162178474	0.758160397678986	4.93203236839072	8.13784271628407e-07	6.09083302741691e-05	6	62.5	FFPE-ATAC in FFPE liver
peak_83743	chr8	19753752	19753998	16.9528087560737	7.41047859676885	1.50341219954537	4.92910633491586	8.26066068023903e-07	6.15877434206618e-05	0	65.5	FFPE-ATAC in FFPE liver
peak_9598	chr10	81326217	81327301	16.723518715367	7.39090755208887	1.50210475390137	4.92036759280118	8.63818215757643e-07	6.37175175586272e-05	3	284	FFPE-ATAC in FFPE liver
peak_83767	chr8	19918052	19918469	16.723518715367	7.39090755208887	1.50210475390137	4.92036759280118	8.63818215757643e-07	6.37175175586272e-05	0	109.5	FFPE-ATAC in FFPE liver
peak_9596	chr10	81167034	81168205	16.7220491714096	7.39081589117841	1.50209279448805	4.92034574581486	8.63914646717979e-07	6.37175175586272e-05	0	308.5	FFPE-ATAC in FFPE liver
peak_66088	chr5	15127685	15128028	16.4971677625751	7.37125614142001	1.5026836285344	4.90539458968442	9.32397039561215e-07	6.84009315235969e-05	0	90	FFPE-ATAC in FFPE liver
peak_84531	chr8	41501419	41502180	16.4971677625751	7.37125614142001	1.5026836285344	4.90539458968442	9.32397039561215e-07	6.84009315235969e-05	0	195	FFPE-ATAC in FFPE liver
peak_93687	chrUn_random	5899449	5900401	16.4971677625751	7.37125614142001	1.5026836285344	4.90539458968442	9.32397039561215e-07	6.84009315235969e-05	2.5	246.5	FFPE-ATAC in FFPE liver
peak_80051	chr7	82139261	82139888	16.4979025345538	7.37130259772439	1.50282515364313	4.9049635480581	9.34446912729789e-07	6.84468118956999e-05	2	164	FFPE-ATAC in FFPE liver
peak_83747	chr8	19765952	19766249	16.494963446639	7.37111667452071	1.5030724947878	4.90403270639409	9.38888460935353e-07	6.87197706571282e-05	0	77	FFPE-ATAC in FFPE liver
peak_46675	chr19	45724339	45724842	20.1997204510954	3.27158583153371	0.668981318259587	4.89039939118932	1.0063158375521e-06	7.31535284572105e-05	18	145	FFPE-ATAC in FFPE liver
peak_15179	chr11	85930478	85930867	16.2700820378045	7.35128639421213	1.5033724141997	4.88986383199368	1.0090575481663e-06	7.31867535802848e-05	0	100.5	FFPE-ATAC in FFPE liver
peak_38733	chr17	29243261	29243509	16.2700820378045	7.35128639421213	1.5033724141997	4.88986383199368	1.0090575481663e-06	7.31867535802848e-05	0	63	FFPE-ATAC in FFPE liver
peak_73119	chr6	46258170	46258559	16.2700820378045	7.35128639421213	1.5033724141997	4.88986383199368	1.0090575481663e-06	7.31867535802848e-05	1	100.5	FFPE-ATAC in FFPE liver
peak_82167	chr7	134069126	134069337	16.2730211257193	7.35147489597711	1.5039539512682	4.88809839541832	1.01814643123312e-06	7.37052031979922e-05	0	54.5	FFPE-ATAC in FFPE liver
peak_84956	chr8	57983978	57984273	16.2686124938471	7.35119193265039	1.50391748414002	4.88802877164102	1.01850648110272e-06	7.37052031979922e-05	0	75.5	FFPE-ATAC in FFPE liver
peak_19066	chr12	55810798	55811844	22.0112517282947	5.30867493907158	1.08639377617738	4.88651081723873	1.02638690755862e-06	7.41958385505814e-05	11	353.5	FFPE-ATAC in FFPE liver
peak_62102	chr4	88431329	88431665	16.2678777218684	7.35114427263907	1.50440111410754	4.88642570369275	1.02683050584039e-06	7.41958385505814e-05	0	85.5	FFPE-ATAC in FFPE liver
peak_84958	chr8	57997342	57997673	16.2752254416554	7.35161926547207	1.50587211152683	4.88196787044429	1.05032372496431e-06	7.5552552856677e-05	0	84.5	FFPE-ATAC in FFPE liver
peak_970	chr1	46132751	46133163	16.0444658569913	7.33113174512186	1.50398385140975	4.87447504057312	1.09098177278043e-06	7.80100672081432e-05	0	104.5	FFPE-ATAC in FFPE liver
peak_93642	chrUn_random	5473900	5475898	16.0444658569913	7.33113174512186	1.50398385140975	4.87447504057312	1.09098177278043e-06	7.80100672081432e-05	1	507	FFPE-ATAC in FFPE liver
peak_65882	chr5	3479717	3480508	16.0459354009487	7.33122703745077	1.50413875685095	4.87403639063151	1.09340834927427e-06	7.81254492059149e-05	2	200	FFPE-ATAC in FFPE liver
peak_88456	chr8_random	675807	676364	19.1196405352989	4.49336220534402	0.921980707564059	4.87359677754626	1.09584546448763e-06	7.82414122051933e-05	9.5	159.5	FFPE-ATAC in FFPE liver
peak_93504	chrUn_random	3564502	3564777	16.0466701729274	7.33127488203579	1.50443069323307	4.87312238111856	1.09848127482315e-06	7.83713789703451e-05	0	69.5	FFPE-ATAC in FFPE liver
peak_66676	chr5	33072877	33073086	19.1162990029256	4.49402760829893	0.922313501143611	4.87255971285969	1.10161544520478e-06	7.85366821328409e-05	3	60	FFPE-ATAC in FFPE liver
peak_21747	chr13	3372069	3373661	21.7856355474816	5.2934268928765	1.08704049076166	4.86957655934928	1.11837646944323e-06	7.93782979811175e-05	17	534	FFPE-ATAC in FFPE liver
peak_93668	chrUn_random	5807381	5807780	15.8188496761781	7.31069147789701	1.50464427696461	4.85875072920571	1.1812874573573e-06	8.32010902703077e-05	0	98.5	FFPE-ATAC in FFPE liver
peak_33928	chr16	3113543	3113794	15.8195844481568	7.3107397424272	1.50472364343672	4.85852653031343	1.18262564056149e-06	8.32010902703077e-05	0	62.5	FFPE-ATAC in FFPE liver
peak_75316	chr6	103264465	103264838	15.8195844481568	7.3107397424272	1.50472364343672	4.85852653031343	1.18262564056149e-06	8.32010902703077e-05	1	92.5	FFPE-ATAC in FFPE liver
peak_42820	chr18	43135334	43135849	15.8203192201355	7.3107881243882	1.50494965081881	4.85782904458668	1.1867980794379e-06	8.33116647407894e-05	0	127.5	FFPE-ATAC in FFPE liver
peak_45496	chr19	24585790	24586341	15.8203192201355	7.3107881243882	1.50494965081881	4.85782904458668	1.1867980794379e-06	8.33116647407894e-05	1	138	FFPE-ATAC in FFPE liver
peak_88462	chr8_random	697027	697370	15.8203192201355	7.3107881243882	1.50494965081881	4.85782904458668	1.1867980794379e-06	8.33116647407894e-05	0	85	FFPE-ATAC in FFPE liver
peak_38732	chr17	29241268	29241638	15.8210539921142	7.31083673837386	1.50532311504373	4.8566561327011	1.19384652543017e-06	8.36541650626491e-05	0	92	FFPE-ATAC in FFPE liver
peak_63295	chr4	118219767	118221412	15.8210539921142	7.31083673837386	1.50532311504373	4.8566561327011	1.19384652543017e-06	8.36541650626491e-05	4	408	FFPE-ATAC in FFPE liver
peak_95890	chrY	1900681	1901064	15.8166453602421	7.31054622761607	1.50528602530785	4.8565828053316	1.19428851081096e-06	8.36541650626491e-05	0	95	FFPE-ATAC in FFPE liver
peak_93571	chrUn_random	4527731	4528037	38.2388675090248	7.13098081881731	1.4694776933988	4.85273158677478	1.2177245391968e-06	8.51096463024658e-05	1	182.5	FFPE-ATAC in FFPE liver
peak_78950	chr7	46585534	46585832	18.8925548105283	4.47537464898193	0.922840228495858	4.84956605790405	1.2373185962127e-06	8.59469958895619e-05	5	85.5	FFPE-ATAC in FFPE liver
peak_22231	chr13	21901673	21902748	15.5932334953649	7.28995739419202	1.50535682942114	4.84267733185575	1.28101221604028e-06	8.84450688598165e-05	0	261.5	FFPE-ATAC in FFPE liver
peak_62107	chr4	88442511	88443424	15.5932334953649	7.28995739419202	1.50535682942114	4.84267733185575	1.28101221604028e-06	8.84450688598165e-05	0	224	FFPE-ATAC in FFPE liver
peak_60162	chr4	28103927	28104318	15.5924987233863	7.28990849577652	1.50535059377221	4.84266490871669	1.28109233785837e-06	8.84450688598165e-05	0	95	FFPE-ATAC in FFPE liver
peak_95860	chrX	166508582	166508840	15.5939682673436	7.29000635392641	1.50551344654681	4.84220607304935	1.28405493265352e-06	8.85390615698569e-05	0	64	FFPE-ATAC in FFPE liver
peak_3161	chr1	125215318	125215688	15.5917639514076	7.28985953839958	1.50549473953104	4.84216872167244	1.28429639162952e-06	8.85390615698569e-05	0	90	FFPE-ATAC in FFPE liver
peak_93675	chrUn_random	5879997	5880314	15.5947030393223	7.29005549436449	1.50582102057607	4.84124965367768	1.29025150889516e-06	8.87585901988855e-05	0	77.5	FFPE-ATAC in FFPE liver
peak_57214	chr3	95848414	95848960	15.595437811301	7.29010493242877	1.506280705229	4.83980502911669	1.29966569915247e-06	8.92753203331455e-05	0	134	FFPE-ATAC in FFPE liver
peak_41467	chr18	3010165	3010412	21.3288573375457	5.26296544391346	1.08891923483392	4.83320091660991	1.34355067191637e-06	9.15953532400586e-05	2	80.5	FFPE-ATAC in FFPE liver
peak_49658	chr2	58278269	58279011	15.3676173145518	7.26892093803106	1.50612491606263	4.82624041373257	1.39134539066465e-06	9.43544157627504e-05	1	178.5	FFPE-ATAC in FFPE liver
peak_60094	chr4	20118868	20119245	15.3676173145518	7.26892093803106	1.50612491606263	4.82624041373257	1.39134539066465e-06	9.43544157627504e-05	1	92	FFPE-ATAC in FFPE liver
peak_62105	chr4	88437101	88437649	15.3676173145518	7.26892093803106	1.50612491606263	4.82624041373257	1.39134539066465e-06	9.43544157627504e-05	0	131.5	FFPE-ATAC in FFPE liver
peak_93582	chrUn_random	4739715	4740698	15.3676173145518	7.26892093803106	1.50612491606263	4.82624041373257	1.39134539066465e-06	9.43544157627504e-05	1	240.5	FFPE-ATAC in FFPE liver
peak_6055	chr1	191729570	191730229	15.3661477705944	7.26882177656738	1.50611233414527	4.82621489232574	1.39152360734407e-06	9.43544157627504e-05	0	159	FFPE-ATAC in FFPE liver
peak_1957	chr1	76189021	76189256	15.3654129986157	7.26877207345794	1.5063379649484	4.82545898901708	1.39681206601787e-06	9.45326994144007e-05	0	56.5	FFPE-ATAC in FFPE liver
peak_31112	chr15	47371407	47371819	15.3654129986157	7.26877207345794	1.5063379649484	4.82545898901708	1.39681206601787e-06	9.45326994144007e-05	1	100	FFPE-ATAC in FFPE liver
peak_62104	chr4	88436621	88437035	15.3639434546583	7.26867181071756	1.50725765618632	4.82244809365165	1.41806938441358e-06	9.55675343484671e-05	0	100	FFPE-ATAC in FFPE liver
peak_31666	chr15	63886859	63887387	21.1065826891059	5.24657863074508	1.08849749454585	4.82001902350185	1.43544532788691e-06	9.64005359193485e-05	4	171	FFPE-ATAC in FFPE liver
peak_59600	chr4	3007618	3007930	21.1073174610846	5.24661608569384	1.08862400678734	4.81949328049199	1.43923300154053e-06	9.65200069183868e-05	2	100.5	FFPE-ATAC in FFPE liver
peak_83779	chr8	20004079	20004510	19.7525643938211	3.23501793786184	0.671500594855709	4.81759504406244	1.45298884729279e-06	9.73234564071972e-05	17.5	121	FFPE-ATAC in FFPE liver
peak_33937	chr16	3234115	3234319	15.3712911744452	7.26917311451467	1.50889081829098	4.81756070511978	1.45323884980883e-06	9.73234564071972e-05	0	49.5	FFPE-ATAC in FFPE liver
peak_83733	chr8	19699387	19699723	18.6706124896086	4.45745207498803	0.925473080473558	4.81640381447635	1.46168573134529e-06	9.77529033776932e-05	5	95	FFPE-ATAC in FFPE liver
peak_18559	chr12	31263299	31263993	15.1412663617599	7.24752285895478	1.50678713117246	4.80991820876206	1.50992067876249e-06	0.000100064508956089	0	165.5	FFPE-ATAC in FFPE liver
peak_33936	chr16	3232741	3232943	15.1412663617599	7.24752285895478	1.50678713117246	4.80991820876206	1.50992067876249e-06	0.000100064508956089	0	48	FFPE-ATAC in FFPE liver
peak_79516	chr7	67048209	67048451	15.1412663617599	7.24752285895478	1.50678713117246	4.80991820876206	1.50992067876249e-06	0.000100064508956089	0	57.5	FFPE-ATAC in FFPE liver
peak_6142	chr1	192944676	192945156	15.1405315897812	7.24747260861072	1.50678078341358	4.80990512249018	1.51001953412753e-06	0.000100064508956089	1	113.5	FFPE-ATAC in FFPE liver
peak_27301	chr14	36610893	36611260	15.1405315897812	7.24747260861072	1.50678078341358	4.80990512249018	1.51001953412753e-06	0.000100064508956089	1	87.5	FFPE-ATAC in FFPE liver
peak_93442	chr9	123836282	123836989	15.1405315897812	7.24747260861072	1.50678078341358	4.80990512249018	1.51001953412753e-06	0.000100064508956089	0	169	FFPE-ATAC in FFPE liver
peak_62098	chr4	88421990	88422976	15.1420011337386	7.24757317468451	1.50695224348712	4.80942458927129	1.51365385581033e-06	0.000100064508956089	0	233.5	FFPE-ATAC in FFPE liver
peak_79515	chr7	67045065	67045265	15.1397968178025	7.24742229516215	1.50693319992027	4.80938524384865	1.51395180144174e-06	0.000100064508956089	0	47.5	FFPE-ATAC in FFPE liver
peak_85975	chr8	87147537	87147904	15.1397968178025	7.24742229516215	1.50693319992027	4.80938524384865	1.51395180144174e-06	0.000100064508956089	0.5	87	FFPE-ATAC in FFPE liver
peak_83760	chr8	19881085	19881487	20.8831708242288	5.23077025799336	1.09006175802668	4.79859991369894	1.59778597762512e-06	0.000104598384210987	5	128.5	FFPE-ATAC in FFPE liver
peak_36982	chr16	91358546	91358866	20.4707419768979	3.07932574393771	0.642325275917392	4.79402860106931	1.63464953758352e-06	0.000106215747032354	14	92	FFPE-ATAC in FFPE liver
peak_62099	chr4	88425004	88425884	14.914915408968	7.2258026905785	1.50750342608104	4.79322472212415	1.6412160635792e-06	0.000106356117819919	0	206.5	FFPE-ATAC in FFPE liver
peak_88482	chr8_random	839944	840385	14.914915408968	7.2258026905785	1.50750342608104	4.79322472212415	1.6412160635792e-06	0.000106356117819919	0	103.5	FFPE-ATAC in FFPE liver
peak_93631	chrUn_random	5327268	5328266	14.9156501809467	7.22585366238682	1.50759140006027	4.79297882841329	1.64322971769685e-06	0.000106356117819919	0	234	FFPE-ATAC in FFPE liver
peak_11062	chr10	117653229	117653463	14.9141806369893	7.22575171990353	1.5075785875269	4.7929519427289	1.64345003186802e-06	0.000106356117819919	0	55	FFPE-ATAC in FFPE liver
peak_24501	chr13	73657995	73658560	14.9141806369893	7.22575171990353	1.5075785875269	4.7929519427289	1.64345003186802e-06	0.000106356117819919	0	133.5	FFPE-ATAC in FFPE liver
peak_46197	chr19	39064994	39065989	14.9141806369893	7.22575171990353	1.5075785875269	4.7929519427289	1.64345003186802e-06	0.000106356117819919	1	234	FFPE-ATAC in FFPE liver
peak_1212	chr1	56838991	56839370	14.9134458650106	7.22570061761605	1.50781722680551	4.79215948004822	1.64995661719864e-06	0.000106561915877704	0	89	FFPE-ATAC in FFPE liver
peak_30951	chr15	38471034	38471563	14.9134458650106	7.22570061761605	1.50781722680551	4.79215948004822	1.64995661719864e-06	0.000106561915877704	1	123.5	FFPE-ATAC in FFPE liver
peak_83781	chr8	20008229	20008523	18.0358978767235	3.96692703391179	0.827865864903541	4.79175093706032	1.65332066133083e-06	0.000106707469573684	6	78.5	FFPE-ATAC in FFPE liver
peak_83742	chr8	19751854	19752075	14.9171197249041	7.22595613803994	1.50825881398858	4.79092584841652	1.66013475850356e-06	0.000107046942843485	0	52	FFPE-ATAC in FFPE liver
peak_17709	chr11	121843546	121843973	14.9127110930319	7.22564925255534	1.50822037428862	4.7908444785222	1.66080822230168e-06	0.000107046942843485	0	100.5	FFPE-ATAC in FFPE liver
peak_32252	chr15	77559088	77559809	18.0373674206809	3.96701452278522	0.82811071869704	4.79043977238571	1.66416170461974e-06	0.000107191198483489	15	193	FFPE-ATAC in FFPE liver
peak_812	chr1	39957373	39957910	16.5197253708414	-3.48341406010469	0.72723031284	-4.78997368316671	1.66803188435995e-06	0.000107368519859853	164	11	standard ATAC in FFPE liver
peak_93612	chrUn_random	5185836	5186061	14.9178544968828	7.22600789982865	1.50884100922623	4.78911154697097	1.67521345874644e-06	0.000107686530978228	0	53	FFPE-ATAC in FFPE liver
peak_94668	chrX	72985776	72985991	14.9178544968828	7.22600789982865	1.50884100922623	4.78911154697097	1.67521345874644e-06	0.000107686530978228	0	50.5	FFPE-ATAC in FFPE liver
peak_37495	chr17	3027011	3027234	14.9185892688615	7.22606017608709	1.50959187742995	4.78676408115638	1.69491873348579e-06	0.000108735033461583	0	53	FFPE-ATAC in FFPE liver
peak_73977	chr6	72095862	72096452	18.7976789333121	3.40159572128846	0.711794175878787	4.77890356027263	1.76253703771003e-06	0.000112613201391619	20	160.5	FFPE-ATAC in FFPE liver
peak_95858	chrX	166446369	166447036	18.2116299637367	4.42093306718943	0.925466523328558	4.77697783307059	1.77949381495683e-06	0.000113328637909199	10	184	FFPE-ATAC in FFPE liver
peak_8151	chr10	55777934	55778311	14.6892992281548	7.20380225213548	1.50828389373418	4.77615804429261	1.78675984900721e-06	0.000113423356483373	1	87.5	FFPE-ATAC in FFPE liver
peak_38047	chr17	15146648	15147525	14.6892992281548	7.20380225213548	1.50828389373418	4.77615804429261	1.78675984900721e-06	0.000113423356483373	0	201	FFPE-ATAC in FFPE liver
peak_85841	chr8	84742709	84743195	14.6892992281548	7.20380225213548	1.50828389373418	4.77615804429261	1.78675984900721e-06	0.000113423356483373	1	112.5	FFPE-ATAC in FFPE liver
peak_92211	chr9	102548040	102548523	14.6892992281548	7.20380225213548	1.50828389373418	4.77615804429261	1.78675984900721e-06	0.000113423356483373	0	110.5	FFPE-ATAC in FFPE liver
peak_93576	chrUn_random	4536139	4536834	14.6885644561761	7.20375057338903	1.50827742735217	4.77614425751598	1.7868822887747e-06	0.000113423356483373	0	159.5	FFPE-ATAC in FFPE liver
peak_33195	chr15	91740582	91740822	14.6900340001335	7.20385400075798	1.5084582279292	4.77564036403407	1.79136288164737e-06	0.000113431504536538	0	56	FFPE-ATAC in FFPE liver
peak_66102	chr5	15196250	15196739	14.6900340001335	7.20385400075798	1.5084582279292	4.77564036403407	1.79136288164737e-06	0.000113431504536538	1	111.5	FFPE-ATAC in FFPE liver
peak_38043	chr17	15115271	15116206	14.6878296841974	7.20369882696415	1.50843882821365	4.77559891208518	1.79173195028683e-06	0.000113431504536538	0	214	FFPE-ATAC in FFPE liver
peak_65671	chr4	153067244	153067645	14.6878296841974	7.20369882696415	1.50843882821365	4.77559891208518	1.79173195028683e-06	0.000113431504536538	0	92	FFPE-ATAC in FFPE liver
peak_35067	chr16	27702195	27702549	14.6907687721122	7.20390595577322	1.5088011588438	4.7745893576153	1.80074314126948e-06	0.000113741586894206	0	81	FFPE-ATAC in FFPE liver
peak_38048	chr17	15155929	15156516	14.6907687721122	7.20390595577322	1.5088011588438	4.7745893576153	1.80074314126948e-06	0.000113741586894206	0	136.5	FFPE-ATAC in FFPE liver
peak_93593	chrUn_random	4774182	4774532	14.6907687721122	7.20390595577322	1.5088011588438	4.7745893576153	1.80074314126948e-06	0.000113741586894206	0	80.5	FFPE-ATAC in FFPE liver
peak_38118	chr17	17315651	17316732	14.6870949122187	7.20364687608523	1.50876882454802	4.77451996547134	1.80136412616784e-06	0.000113741586894206	0	248.5	FFPE-ATAC in FFPE liver
peak_88541	chr9	7857485	7858238	20.2525436328102	3.06032062089385	0.642845127660511	4.76058772045327	1.93030011341695e-06	0.000120693364671175	36.5	212.5	FFPE-ATAC in FFPE liver
peak_20598	chr12	100188234	100188775	14.4629482753629	7.18140862831432	1.50903330791484	4.75894640008808	1.94606100130154e-06	0.000121220586016376	0	123	FFPE-ATAC in FFPE liver
peak_88463	chr8_random	699820	700043	14.4629482753629	7.18140862831432	1.50903330791484	4.75894640008808	1.94606100130154e-06	0.000121220586016376	0	51	FFPE-ATAC in FFPE liver
peak_33935	chr16	3231614	3231938	14.4636830473416	7.18146107020882	1.50912614516709	4.7586883927544	1.94854975108591e-06	0.000121220586016376	0	73	FFPE-ATAC in FFPE liver
peak_809	chr1	39928418	39928618	14.4622135033842	7.18135618750992	1.50911308822395	4.75866006566912	1.94882318157064e-06	0.000121220586016376	0.5	45.5	FFPE-ATAC in FFPE liver
peak_18223	chr12	19178763	19179789	14.4644178193203	7.18151365534321	1.50939198756938	4.75788510505333	1.95631789337649e-06	0.000121608060924494	0	233.5	FFPE-ATAC in FFPE liver
peak_9820	chr10	86174209	86174686	14.4666221352564	7.18167365137938	1.51124313024509	4.75216297606242	2.01252048172026e-06	0.000124859421132525	0	110	FFPE-ATAC in FFPE liver
peak_61819	chr4	79650824	79651113	14.4673569072351	7.18172817588178	1.51223546482682	4.74908064446446	2.04343451630069e-06	0.000126532309204593	0	65.5	FFPE-ATAC in FFPE liver
peak_22235	chr13	21924925	21925967	14.2373320945497	7.15871517592304	1.50985014060656	4.74134153012505	2.12307686937495e-06	0.000130417017551947	0	235	FFPE-ATAC in FFPE liver
peak_30880	chr15	37471318	37472481	14.2373320945497	7.15871517592304	1.50985014060656	4.74134153012505	2.12307686937495e-06	0.000130417017551947	0	261.5	FFPE-ATAC in FFPE liver
peak_38053	chr17	15178023	15179005	14.2373320945497	7.15871517592304	1.50985014060656	4.74134153012505	2.12307686937495e-06	0.000130417017551947	1	219.5	FFPE-ATAC in FFPE liver
peak_73185	chr6	48071128	48071530	14.2373320945497	7.15871517592304	1.50985014060656	4.74134153012505	2.12307686937495e-06	0.000130417017551947	1	89.5	FFPE-ATAC in FFPE liver
peak_74160	chr6	79768118	79768495	14.2373320945497	7.15871517592304	1.50985014060656	4.74134153012505	2.12307686937495e-06	0.000130417017551947	0	85	FFPE-ATAC in FFPE liver
peak_85081	chr8	63797049	63797725	14.2373320945497	7.15871517592304	1.50985014060656	4.74134153012505	2.12307686937495e-06	0.000130417017551947	1	152.5	FFPE-ATAC in FFPE liver
peak_23196	chr13	43395314	43395521	14.236597322571	7.15866198613351	1.5098435483048	4.741327003166	2.12322913096975e-06	0.000130417017551947	0	46.5	FFPE-ATAC in FFPE liver
peak_85293	chr8	71998456	71999082	14.236597322571	7.15866198613351	1.5098435483048	4.741327003166	2.12322913096975e-06	0.000130417017551947	1	140	FFPE-ATAC in FFPE liver
peak_85299	chr8	72063490	72063703	14.236597322571	7.15866198613351	1.5098435483048	4.741327003166	2.12322913096975e-06	0.000130417017551947	0	48	FFPE-ATAC in FFPE liver
peak_93595	chrUn_random	5091074	5091311	14.236597322571	7.15866198613351	1.5098435483048	4.741327003166	2.12322913096975e-06	0.000130417017551947	0	53	FFPE-ATAC in FFPE liver
peak_19188	chr12	58796762	58797114	14.2380668665284	7.15876844056511	1.5100345058812	4.74079791732145	2.12878179737961e-06	0.000130417017551947	0	79.5	FFPE-ATAC in FFPE liver
peak_78998	chr7	48366588	48367006	14.2380668665284	7.15876844056511	1.5100345058812	4.74079791732145	2.12878179737961e-06	0.000130417017551947	1	93	FFPE-ATAC in FFPE liver
peak_84927	chr8	55118752	55119247	14.2380668665284	7.15876844056511	1.5100345058812	4.74079791732145	2.12878179737961e-06	0.000130417017551947	1	111.5	FFPE-ATAC in FFPE liver
peak_85298	chr8	72062553	72062769	14.2358625505923	7.15860872359849	1.51001472805227	4.74075423941871	2.12924081225162e-06	0.000130417017551947	0	48	FFPE-ATAC in FFPE liver
peak_96039	chrY_random	39577290	39577661	14.2358625505923	7.15860872359849	1.51001472805227	4.74075423941871	2.12924081225162e-06	0.000130417017551947	0	83	FFPE-ATAC in FFPE liver
peak_35979	chr16	45352973	45353362	14.2388016385071	7.15882192653848	1.51039746870382	4.7396940705164	2.1404114189696e-06	0.000130648925752599	0	86.5	FFPE-ATAC in FFPE liver
peak_40951	chr17	81971058	81971614	14.2388016385071	7.15882192653848	1.51039746870382	4.7396940705164	2.1404114189696e-06	0.000130648925752599	0	124	FFPE-ATAC in FFPE liver
peak_93703	chrX	4240352	4240552	14.2388016385071	7.15882192653848	1.51039746870382	4.7396940705164	2.1404114189696e-06	0.000130648925752599	0	44.5	FFPE-ATAC in FFPE liver
peak_88858	chr9	21095480	21096244	14.2351277786136	7.15855524156552	1.51036450309687	4.73962095036498	2.14118393020274e-06	0.000130648925752599	0	170	FFPE-ATAC in FFPE liver
peak_45460	chr19	23431783	23432147	14.0109811417578	7.1356049972348	1.51063406791374	4.72358273177928	2.31725627605659e-06	0.000139563756366479	0	80.5	FFPE-ATAC in FFPE liver
peak_62108	chr4	88445397	88446331	14.0109811417578	7.1356049972348	1.51063406791374	4.72358273177928	2.31725627605659e-06	0.000139563756366479	0	206	FFPE-ATAC in FFPE liver
peak_5192	chr1	173001882	173002096	14.0117159137365	7.13565899529818	1.5107321987251	4.72331165068166	2.3203485457093e-06	0.000139563756366479	0	47.5	FFPE-ATAC in FFPE liver
peak_62097	chr4	88419047	88420054	14.0102463697791	7.13555100021485	1.5107188818694	4.72328180037383	2.32068929547391e-06	0.000139563756366479	0	221.5	FFPE-ATAC in FFPE liver
peak_93530	chrUn_random	3903496	3903850	14.0102463697791	7.13555100021485	1.5107188818694	4.72328180037383	2.32068929547391e-06	0.000139563756366479	0	78	FFPE-ATAC in FFPE liver
peak_93549	chrUn_random	4074554	4074972	14.0102463697791	7.13555100021485	1.5107188818694	4.72328180037383	2.32068929547391e-06	0.000139563756366479	1	91	FFPE-ATAC in FFPE liver
peak_4089	chr1	144973991	144974699	14.0124506857152	7.1357131471203	1.51101371367759	4.7224674948535	2.33000337957569e-06	0.000139948740489989	2	158.5	FFPE-ATAC in FFPE liver
peak_29151	chr14	86598666	86599076	14.0124506857152	7.1357131471203	1.51101371367759	4.7224674948535	2.33000337957569e-06	0.000139948740489989	1	91.5	FFPE-ATAC in FFPE liver
peak_24987	chr13	96276664	96277199	14.0131854576939	7.13576760320029	1.51147993140362	4.72104687263279	2.34633855042586e-06	0.000140640913319574	0	117.5	FFPE-ATAC in FFPE liver
peak_17965	chr12	10457727	10457960	14.0087768258217	7.135442399809	1.51143997336916	4.7209565219473	2.34738116755735e-06	0.000140640913319574	0	51	FFPE-ATAC in FFPE liver
peak_41376	chr17	88619777	88620152	14.0087768258217	7.135442399809	1.51143997336916	4.7209565219473	2.34738116755735e-06	0.000140640913319574	0	81.5	FFPE-ATAC in FFPE liver
peak_93542	chrUn_random	4055679	4056145	14.0139202296726	7.13582250995328	1.51213306146633	4.71904403904349	2.36955523497401e-06	0.000141792650804155	1	102.5	FFPE-ATAC in FFPE liver
peak_83889	chr8	24298363	24298710	18.3527271919739	3.36270757116129	0.714052252197877	4.70932982958986	2.48532612274087e-06	0.000148166756233029	12	91	FFPE-ATAC in FFPE liver
peak_55063	chr3	27426852	27427397	13.7853649609446	7.11217344951267	1.51148886296327	4.70540909945528	2.53357376760328e-06	0.000150438706623748	1	118.5	FFPE-ATAC in FFPE liver
peak_55468	chr3	39437841	39438070	13.7853649609446	7.11217344951267	1.51148886296327	4.70540909945528	2.53357376760328e-06	0.000150438706623748	0	49	FFPE-ATAC in FFPE liver
peak_58681	chr3	131260665	131261332	13.7853649609446	7.11217344951267	1.51148886296327	4.70540909945528	2.53357376760328e-06	0.000150438706623748	0	144.5	FFPE-ATAC in FFPE liver
peak_93555	chrUn_random	4249085	4249527	13.7853649609446	7.11217344951267	1.51148886296327	4.70540909945528	2.53357376760328e-06	0.000150438706623748	1	96.5	FFPE-ATAC in FFPE liver
peak_87566	chr8	121368575	121369052	13.7838954169872	7.11206379060989	1.51166398183135	4.70479145900783	2.54125581754787e-06	0.000150659942367665	0	104	FFPE-ATAC in FFPE liver
peak_58032	chr3	115609279	115610529	13.786834504902	7.1122834287654	1.51206897153727	4.70367659322748	2.55517886329523e-06	0.000151205541330294	2	273	FFPE-ATAC in FFPE liver
peak_67366	chr5	54381810	54382066	13.786834504902	7.1122834287654	1.51206897153727	4.70367659322748	2.55517886329523e-06	0.000151205541330294	0	55.5	FFPE-ATAC in FFPE liver
peak_87395	chr8	118512709	118513102	13.7875692768807	7.11233892952649	1.51264516843035	4.70192155963905	2.57724513629359e-06	0.000152230124209027	0	86	FFPE-ATAC in FFPE liver
peak_74581	chr6	87983735	87984372	17.6223206958408	3.58702275755918	0.763822731862448	4.69614559495087	2.65116602995834e-06	0.000155925555575922	16.5	162	FFPE-ATAC in FFPE liver
peak_83755	chr8	19855269	19855470	17.36125365022	3.90821200090902	0.832932359350739	4.69211209894093	2.70398889487518e-06	0.000158547126769551	4	51.5	FFPE-ATAC in FFPE liver
peak_2345	chr1	89937137	89937567	13.5590140081527	7.08829934254803	1.51230864505763	4.68707189217842	2.77141633026647e-06	0.000161765263846378	0	91	FFPE-ATAC in FFPE liver
peak_55164	chr3	29226055	29226732	13.5590140081527	7.08829934254803	1.51230864505763	4.68707189217842	2.77141633026647e-06	0.000161765263846378	0	145.5	FFPE-ATAC in FFPE liver
peak_88857	chr9	21092051	21092847	13.5590140081527	7.08829934254803	1.51230864505763	4.68707189217842	2.77141633026647e-06	0.000161765263846378	0	168.5	FFPE-ATAC in FFPE liver
peak_19287	chr12	69871650	69872143	13.5597487801314	7.08835499000779	1.51241255026518	4.6867866765354	2.77527976446029e-06	0.000161765263846378	0	106	FFPE-ATAC in FFPE liver
peak_85551	chr8	74352586	74353021	13.5597487801314	7.08835499000779	1.51241255026518	4.6867866765354	2.77527976446029e-06	0.000161765263846378	2	92.5	FFPE-ATAC in FFPE liver
peak_38117	chr17	17257732	17258921	13.558279236174	7.0882436960819	1.51239895596444	4.68675521635877	2.77570622965887e-06	0.000161765263846378	0	252	FFPE-ATAC in FFPE liver
peak_5708	chr1	183673053	183674025	13.5604835521101	7.08841080295261	1.51271117158743	4.68589836321107	2.78734569752094e-06	0.000162050511931734	0	206.5	FFPE-ATAC in FFPE liver
peak_76558	chr6	131297502	131298419	13.5604835521101	7.08841080295261	1.51271117158743	4.68589836321107	2.78734569752094e-06	0.000162050511931734	0	193	FFPE-ATAC in FFPE liver
peak_83784	chr8	20036885	20037209	13.5604835521101	7.08841080295261	1.51271117158743	4.68589836321107	2.78734569752094e-06	0.000162050511931734	0	69	FFPE-ATAC in FFPE liver
peak_88466	chr8_random	718749	718972	13.5604835521101	7.08841080295261	1.51271117158743	4.68589836321107	2.78734569752094e-06	0.000162050511931734	0	48	FFPE-ATAC in FFPE liver
peak_93546	chrUn_random	4068509	4068808	13.5634226400249	7.08863887767646	1.51591032051354	4.67615978448847	2.9229688946369e-06	0.000168811993216584	0	63.5	FFPE-ATAC in FFPE liver
peak_2166	chr1	85253707	85253952	13.3333978273395	7.06408007091579	1.51320295457883	4.66829650942754	3.03707378697012e-06	0.000173952195481991	0	51.5	FFPE-ATAC in FFPE liver
peak_13587	chr11	58564797	58565176	13.3333978273395	7.06408007091579	1.51320295457883	4.66829650942754	3.03707378697012e-06	0.000173952195481991	0	79.5	FFPE-ATAC in FFPE liver
peak_71603	chr5	148422900	148423297	13.3333978273395	7.06408007091579	1.51320295457883	4.66829650942754	3.03707378697012e-06	0.000173952195481991	2	83.5	FFPE-ATAC in FFPE liver
peak_93514	chrUn_random	3636081	3636477	13.3333978273395	7.06408007091579	1.51320295457883	4.66829650942754	3.03707378697012e-06	0.000173952195481991	0	83	FFPE-ATAC in FFPE liver
peak_37715	chr17	7146088	7146553	13.3326630553608	7.06402358327473	1.51319608465942	4.66828037350141	3.0373122725727e-06	0.000173952195481991	0	97.5	FFPE-ATAC in FFPE liver
peak_60760	chr4	46041996	46042512	13.3326630553608	7.06402358327473	1.51319608465942	4.66828037350141	3.0373122725727e-06	0.000173952195481991	0	107.5	FFPE-ATAC in FFPE liver
peak_74241	chr6	82975486	82975913	13.3341325993182	7.06413664513332	1.51341019910002	4.6676946206218	3.04598175056676e-06	0.000174241034638671	1	89	FFPE-ATAC in FFPE liver
peak_75741	chr6	116192052	116192479	13.3341325993182	7.06413664513332	1.51341019910002	4.6676946206218	3.04598175056676e-06	0.000174241034638671	1	89.5	FFPE-ATAC in FFPE liver
peak_12706	chr11	33654719	33655189	13.3348673712969	7.06419347586658	1.51381888557929	4.66647202195747	3.06415345679925e-06	0.000174622199327236	0	98	FFPE-ATAC in FFPE liver
peak_37494	chr17	3012839	3013076	13.3348673712969	7.06419347586658	1.51381888557929	4.66647202195747	3.06415345679925e-06	0.000174622199327236	0	49.5	FFPE-ATAC in FFPE liver
peak_83740	chr8	19735815	19736151	13.3348673712969	7.06419347586658	1.51381888557929	4.66647202195747	3.06415345679925e-06	0.000174622199327236	0	70.5	FFPE-ATAC in FFPE liver
peak_93547	chrUn_random	4070878	4071236	13.3311935114034	7.06391018374036	1.51378452690327	4.66639079617952	3.06536440724488e-06	0.000174622199327236	0	74.5	FFPE-ATAC in FFPE liver
peak_33194	chr15	91739841	91740348	13.3356021432756	7.06425072942775	1.51443115601528	4.66462321602982	3.09183026619586e-06	0.000176019258389655	0	107	FFPE-ATAC in FFPE liver
peak_93543	chrUn_random	4056425	4056754	13.3304587394247	7.06385293454149	1.51438304368596	4.66450873442712	3.0935519283691e-06	0.000176019258389655	0	68	FFPE-ATAC in FFPE liver
peak_24722	chr13	85266153	85267137	32.1299284270998	6.878312277215	1.47493949299446	4.66345386362291	3.10945922143828e-06	0.000176819674614592	7	492	FFPE-ATAC in FFPE liver
peak_56271	chr3	69344548	69344859	17.3165830772093	4.34266550164052	0.931291929439077	4.66305501461409	3.11549422233482e-06	0.000176953443117507	6	80	FFPE-ATAC in FFPE liver
peak_83773	chr8	19958487	19958968	13.337071687233	7.06436714652155	1.51628057539055	4.6590105163762	3.17732972080724e-06	0.000180358972728303	0	101.5	FFPE-ATAC in FFPE liver
peak_93569	chrUn_random	4524918	4525302	31.9079861061801	6.86818103252253	1.47501469722456	4.65634752348296	3.21868454292359e-06	0.000182383267655686	2	191.5	FFPE-ATAC in FFPE liver
peak_25984	chr13	117876214	117876589	13.1070468745476	7.03938980385435	1.51405983866932	4.64934715528889	3.32987337353777e-06	0.000186949669145095	0	77.5	FFPE-ATAC in FFPE liver
peak_66106	chr5	15216407	15216608	13.1070468745476	7.03938980385435	1.51405983866932	4.64934715528889	3.32987337353777e-06	0.000186949669145095	0	41.5	FFPE-ATAC in FFPE liver
peak_71003	chr5	139672056	139672494	13.1070468745476	7.03938980385435	1.51405983866932	4.64934715528889	3.32987337353777e-06	0.000186949669145095	0.5	91	FFPE-ATAC in FFPE liver
peak_17425	chr11	118841399	118841716	13.1077816465263	7.03944720181333	1.51417005692761	4.64904663092929	3.33472821740826e-06	0.000186949669145095	0	65	FFPE-ATAC in FFPE liver
peak_36099	chr16	50030488	50030974	13.1077816465263	7.03944720181333	1.51417005692761	4.64904663092929	3.33472821740826e-06	0.000186949669145095	0	100	FFPE-ATAC in FFPE liver
peak_59170	chr3	145763953	145764732	13.1077816465263	7.03944720181333	1.51417005692761	4.64904663092929	3.33472821740826e-06	0.000186949669145095	0	162	FFPE-ATAC in FFPE liver
peak_81240	chr7	113423272	113423940	13.1077816465263	7.03944720181333	1.51417005692761	4.64904663092929	3.33472821740826e-06	0.000186949669145095	1	138.5	FFPE-ATAC in FFPE liver
peak_93609	chrUn_random	5182825	5183191	13.1077816465263	7.03944720181333	1.51417005692761	4.64904663092929	3.33472821740826e-06	0.000186949669145095	1	76.5	FFPE-ATAC in FFPE liver
peak_12111	chr11	11270196	11270625	13.1063121025689	7.03933240683665	1.51415616522753	4.64901346934636	3.33526434440531e-06	0.000186949669145095	0	87.5	FFPE-ATAC in FFPE liver
peak_36932	chr16	90448927	90449550	13.1063121025689	7.03933240683665	1.51415616522753	4.64901346934636	3.33526434440531e-06	0.000186949669145095	0	128	FFPE-ATAC in FFPE liver
peak_91807	chr9	88821163	88821396	13.1063121025689	7.03933240683665	1.51415616522753	4.64901346934636	3.33526434440531e-06	0.000186949669145095	0	48	FFPE-ATAC in FFPE liver
peak_93529	chrUn_random	3903014	3903280	13.1063121025689	7.03933240683665	1.51415616522753	4.64901346934636	3.33526434440531e-06	0.000186949669145095	0	54.5	FFPE-ATAC in FFPE liver
peak_22776	chr13	35130086	35131119	17.0820795157133	4.32411045127814	0.93014960255617	4.64883330530372	3.3381785212897e-06	0.000186949669145095	17	264.5	FFPE-ATAC in FFPE liver
peak_24747	chr13	89763245	89763954	13.108516418505	7.03950477838634	1.5144873913452	4.64811052149712	3.34989421124022e-06	0.000187229876695713	0	146	FFPE-ATAC in FFPE liver
peak_88481	chr8_random	837223	837520	13.108516418505	7.03950477838634	1.5144873913452	4.64811052149712	3.34989421124022e-06	0.000187229876695713	0	61	FFPE-ATAC in FFPE liver
peak_25457	chr13	106363113	106363479	13.1055773305902	7.03927483295908	1.51445960353823	4.64804397325172	3.3509748799882e-06	0.000187229876695713	0	76	FFPE-ATAC in FFPE liver
peak_67180	chr5	47138562	47139132	13.1055773305902	7.03927483295908	1.51445960353823	4.64804397325172	3.3509748799882e-06	0.000187229876695713	1	118.5	FFPE-ATAC in FFPE liver
peak_83758	chr8	19871789	19872001	17.2992107603022	4.34443546859513	0.934802103122558	4.64743869754169	3.36081923852499e-06	0.000187561817921445	3	54.5	FFPE-ATAC in FFPE liver
peak_74178	chr6	81652661	81653169	13.1092511904837	7.03956270864036	1.51501355591998	4.64653446903692	3.37557752285376e-06	0.000188258454797861	0	104	FFPE-ATAC in FFPE liver
peak_66072	chr5	14981200	14981419	13.1048425586115	7.03921690658825	1.51497186454549	4.64643408324953	3.37721978805345e-06	0.000188258454797861	0	44.5	FFPE-ATAC in FFPE liver
peak_10373	chr10	95540096	95540651	31.4564214170336	6.84707208562163	1.47547795631222	4.64057904513536	3.47434242484981e-06	0.000192975895184761	2	272.5	FFPE-ATAC in FFPE liver
peak_55986	chr3	59848958	59849996	31.2300704642417	6.83656542578453	1.47576679126773	4.63255133957289	3.61186727193873e-06	0.000199487165843595	8.5	507	FFPE-ATAC in FFPE liver
peak_2164	chr1	85107426	85107718	12.8814306937344	7.0143279996702	1.51499512481504	4.62993437059843	3.65781648014768e-06	0.000201232029959987	0	59.5	FFPE-ATAC in FFPE liver
peak_75325	chr6	104206930	104207292	12.8814306937344	7.0143279996702	1.51499512481504	4.62993437059843	3.65781648014768e-06	0.000201232029959987	0	73	FFPE-ATAC in FFPE liver
peak_27306	chr14	36743881	36744240	12.8806959217557	7.0142697095001	1.51498810077305	4.62991736101487	3.65811696260325e-06	0.000201232029959987	0	72	FFPE-ATAC in FFPE liver
peak_56164	chr3	66526592	66527203	12.8806959217557	7.0142697095001	1.51498810077305	4.62991736101487	3.65811696260325e-06	0.000201232029959987	0	124	FFPE-ATAC in FFPE liver
peak_93443	chr9	123839650	123840491	12.8806959217557	7.0142697095001	1.51498810077305	4.62991736101487	3.65811696260325e-06	0.000201232029959987	0	168.5	FFPE-ATAC in FFPE liver
peak_37971	chr17	13613878	13614626	12.8821654657131	7.01438638336117	1.51521544788611	4.62929967691854	3.66904469579594e-06	0.00020130686269925	0	150	FFPE-ATAC in FFPE liver
peak_65188	chr4	146777714	146777946	12.8821654657131	7.01438638336117	1.51521544788611	4.62929967691854	3.66904469579594e-06	0.00020130686269925	0	47	FFPE-ATAC in FFPE liver
peak_20649	chr12	100883197	100883986	12.879961149777	7.0142113276107	1.51519437307397	4.62924853223981	3.66995092140732e-06	0.00020130686269925	1	158.5	FFPE-ATAC in FFPE liver
peak_85627	chr8	75843408	75843783	12.879961149777	7.0142113276107	1.51519437307397	4.62924853223981	3.66995092140732e-06	0.00020130686269925	1	75	FFPE-ATAC in FFPE liver
peak_95178	chrX	113400626	113401012	12.879961149777	7.0142113276107	1.51519437307397	4.62924853223981	3.66995092140732e-06	0.00020130686269925	0	78	FFPE-ATAC in FFPE liver
peak_6563	chr10	6899622	6900042	12.8829002376918	7.01444504440073	1.51565029197087	4.62801022212026	3.69195797892016e-06	0.000202366727094682	0	85	FFPE-ATAC in FFPE liver
peak_38045	chr17	15127755	15128088	12.8792263777983	7.01415266984915	1.51561515909276	4.62792459402937	3.69348441576733e-06	0.000202366727094682	0	66.5	FFPE-ATAC in FFPE liver
peak_32859	chr15	85123658	85124039	12.8836350096705	7.01450416269061	1.51630211007149	4.62605975161499	3.72687822171648e-06	0.00020384772388355	0.5	77	FFPE-ATAC in FFPE liver
peak_95853	chrX	166432635	166432994	31.0025822950125	6.82631327299868	1.47581060712082	4.62546700780003	3.73755299256629e-06	0.000204083135052048	2	173	FFPE-ATAC in FFPE liver
peak_61705	chr4	70039005	70039431	31.0011127510551	6.82626216396703	1.47588612164337	4.62519571385775	3.74244851883211e-06	0.000204225903030477	3	206.5	FFPE-ATAC in FFPE liver
peak_83759	chr8	19876848	19877181	16.8598048672735	4.30323357940649	0.930885062416073	4.62273351796798	3.78716103914405e-06	0.000206322987632552	4	84	FFPE-ATAC in FFPE liver
peak_93550	chrUn_random	4076439	4076639	12.8851045536279	7.01462444683639	1.51827286539048	4.62013423722244	3.8349184456104e-06	0.000208216572011328	0	41	FFPE-ATAC in FFPE liver
peak_56032	chr3	60539891	60540301	12.6550797409425	6.98876379442786	1.51589020780375	4.6103363940541	4.02017917306827e-06	0.000216106055253314	2	81	FFPE-ATAC in FFPE liver
peak_78997	chr7	48365452	48365810	12.6550797409425	6.98876379442786	1.51589020780375	4.6103363940541	4.02017917306827e-06	0.000216106055253314	1	71.5	FFPE-ATAC in FFPE liver
peak_95915	chrY_random	5294796	5295155	12.6550797409425	6.98876379442786	1.51589020780375	4.6103363940541	4.02017917306827e-06	0.000216106055253314	0	71	FFPE-ATAC in FFPE liver
peak_23523	chr13	49479275	49479900	12.6558145129212	6.98882305267247	1.5160073440429	4.61001925890058	4.02631670226457e-06	0.000216106055253314	0	126	FFPE-ATAC in FFPE liver
peak_32392	chr15	78811216	78811416	12.6558145129212	6.98882305267247	1.5160073440429	4.61001925890058	4.02631670226457e-06	0.000216106055253314	0	39.5	FFPE-ATAC in FFPE liver
peak_36172	chr16	54444268	54444754	12.6558145129212	6.98882305267247	1.5160073440429	4.61001925890058	4.02631670226457e-06	0.000216106055253314	0	97.5	FFPE-ATAC in FFPE liver
peak_51024	chr2	102427037	102427557	12.6558145129212	6.98882305267247	1.5160073440429	4.61001925890058	4.02631670226457e-06	0.000216106055253314	0	104.5	FFPE-ATAC in FFPE liver
peak_17831	chr12	7262244	7262631	12.6543449689638	6.98870453707059	1.51599313208656	4.60998429950114	4.02699382217423e-06	0.000216106055253314	0	76	FFPE-ATAC in FFPE liver
peak_45704	chr19	29734966	29735404	12.6543449689638	6.98870453707059	1.51599313208656	4.60998429950114	4.02699382217423e-06	0.000216106055253314	1	87.5	FFPE-ATAC in FFPE liver
peak_6445	chr10	3715521	3716098	12.6565492848999	6.98888250429885	1.51634519655804	4.6090313209439	4.04549391906464e-06	0.000216106055253314	0	115.5	FFPE-ATAC in FFPE liver
peak_22232	chr13	21903519	21903951	12.6565492848999	6.98888250429885	1.51634519655804	4.6090313209439	4.04549391906464e-06	0.000216106055253314	0	85	FFPE-ATAC in FFPE liver
peak_59405	chr3	151977571	151978136	12.6565492848999	6.98888250429885	1.51634519655804	4.6090313209439	4.04549391906464e-06	0.000216106055253314	2	112.5	FFPE-ATAC in FFPE liver
peak_61812	chr4	78524988	78525212	12.6565492848999	6.98888250429885	1.51634519655804	4.6090313209439	4.04549391906464e-06	0.000216106055253314	0	44.5	FFPE-ATAC in FFPE liver
peak_64398	chr4	135340129	135340513	12.6565492848999	6.98888250429885	1.51634519655804	4.6090313209439	4.04549391906464e-06	0.000216106055253314	0	76	FFPE-ATAC in FFPE liver
peak_74126	chr6	73405330	73405867	12.6565492848999	6.98888250429885	1.51634519655804	4.6090313209439	4.04549391906464e-06	0.000216106055253314	0	106.5	FFPE-ATAC in FFPE liver
peak_88026	chr8	126061906	126062358	12.6565492848999	6.98888250429885	1.51634519655804	4.6090313209439	4.04549391906464e-06	0.000216106055253314	0	89	FFPE-ATAC in FFPE liver
peak_93673	chrUn_random	5821854	5822506	12.6565492848999	6.98888250429885	1.51634519655804	4.6090313209439	4.04549391906464e-06	0.000216106055253314	1	132	FFPE-ATAC in FFPE liver
peak_21218	chr12	110550299	110550596	12.6536101969851	6.98864508797573	1.51631676659517	4.6089611629557	4.04685910471165e-06	0.000216106055253314	0	58.5	FFPE-ATAC in FFPE liver
peak_22307	chr13	23804716	23804916	12.6536101969851	6.98864508797573	1.51631676659517	4.6089611629557	4.04685910471165e-06	0.000216106055253314	0	40	FFPE-ATAC in FFPE liver
peak_75245	chr6	100265184	100265543	12.6536101969851	6.98864508797573	1.51631676659517	4.6089611629557	4.04685910471165e-06	0.000216106055253314	0	70.5	FFPE-ATAC in FFPE liver
peak_18089	chr12	16252579	16252962	12.6528754250064	6.98858525686443	1.51686307368992	4.60726177469928	4.08006224049352e-06	0.000217231103288592	0	76	FFPE-ATAC in FFPE liver
peak_26038	chr13_random	132011	132947	12.6528754250064	6.98858525686443	1.51686307368992	4.60726177469928	4.08006224049352e-06	0.000217231103288592	0	186	FFPE-ATAC in FFPE liver
peak_66063	chr5	14929003	14929328	12.6528754250064	6.98858525686443	1.51686307368992	4.60726177469928	4.08006224049352e-06	0.000217231103288592	0	64.5	FFPE-ATAC in FFPE liver
peak_65345	chr4	148871060	148871487	12.6580188288573	6.98900274133544	1.5176922519208	4.60501971495876	4.12426786929783e-06	0.000219220348880122	1	85	FFPE-ATAC in FFPE liver
peak_26029	chr13	120283777	120284196	17.6673937133101	3.30338296683695	0.718040417437321	4.60055295860182	4.21370871394959e-06	0.00022313344228286	12	104.5	FFPE-ATAC in FFPE liver
peak_70933	chr5	138610531	138610869	18.3947798874753	5.04256702405691	1.09613101195156	4.60033241380432	4.21817263862072e-06	0.00022322402363256	3.5	95.5	FFPE-ATAC in FFPE liver
peak_83780	chr8	20005790	20006193	16.6308471540869	4.28352472957817	0.932486950901484	4.59365648542005	4.35546132165472e-06	0.000228817656869897	7	99.5	FFPE-ATAC in FFPE liver
peak_9430	chr10	79926920	79927385	30.0997852442396	6.78290697873879	1.47701666364964	4.59230227097001	4.38382792461646e-06	0.000229538703332428	2	218	FFPE-ATAC in FFPE liver
peak_4638	chr1	162596186	162596631	12.4294635601293	6.96279872204541	1.51686778319799	4.59024761364885	4.4272049104351e-06	0.000229538703332428	0	86.5	FFPE-ATAC in FFPE liver
peak_18695	chr12	35535050	35535555	12.4294635601293	6.96279872204541	1.51686778319799	4.59024761364885	4.4272049104351e-06	0.000229538703332428	0	100	FFPE-ATAC in FFPE liver
peak_27725	chr14	49656095	49656526	12.4294635601293	6.96279872204541	1.51686778319799	4.59024761364885	4.4272049104351e-06	0.000229538703332428	1	84	FFPE-ATAC in FFPE liver
peak_29704	chr14	119381486	119382054	12.4294635601293	6.96279872204541	1.51686778319799	4.59024761364885	4.4272049104351e-06	0.000229538703332428	2	110.5	FFPE-ATAC in FFPE liver
peak_31332	chr15	56700053	56701006	12.4294635601293	6.96279872204541	1.51686778319799	4.59024761364885	4.4272049104351e-06	0.000229538703332428	1	187.5	FFPE-ATAC in FFPE liver
peak_38054	chr17	15187212	15187921	12.4294635601293	6.96279872204541	1.51686778319799	4.59024761364885	4.4272049104351e-06	0.000229538703332428	0	138	FFPE-ATAC in FFPE liver
peak_39057	chr17	33391573	33392457	12.4294635601293	6.96279872204541	1.51686778319799	4.59024761364885	4.4272049104351e-06	0.000229538703332428	0	171	FFPE-ATAC in FFPE liver
peak_46972	chr19	52562275	52562801	12.4294635601293	6.96279872204541	1.51686778319799	4.59024761364885	4.4272049104351e-06	0.000229538703332428	0	102	FFPE-ATAC in FFPE liver
peak_63596	chr4	124713164	124713739	12.4294635601293	6.96279872204541	1.51686778319799	4.59024761364885	4.4272049104351e-06	0.000229538703332428	1	113	FFPE-ATAC in FFPE liver
peak_93014	chr9	117195063	117195762	12.4294635601293	6.96279872204541	1.51686778319799	4.59024761364885	4.4272049104351e-06	0.000229538703332428	0	136	FFPE-ATAC in FFPE liver
peak_93516	chrUn_random	3650959	3651554	12.4294635601293	6.96279872204541	1.51686778319799	4.59024761364885	4.4272049104351e-06	0.000229538703332428	2	115.5	FFPE-ATAC in FFPE liver
peak_20560	chr12	96395651	96396983	12.4287287881506	6.96273851511141	1.51686059279885	4.59022968107046	4.42758529884658e-06	0.000229538703332428	1	258.5	FFPE-ATAC in FFPE liver
peak_26049	chr13_random	325875	326858	12.4287287881506	6.96273851511141	1.51686059279885	4.59022968107046	4.42758529884658e-06	0.000229538703332428	0	191	FFPE-ATAC in FFPE liver
peak_47325	chr19	58187821	58188216	12.4287287881506	6.96273851511141	1.51686059279885	4.59022968107046	4.42758529884658e-06	0.000229538703332428	1	77	FFPE-ATAC in FFPE liver
peak_59109	chr3	144825909	144826434	12.4287287881506	6.96273851511141	1.51686059279885	4.59022968107046	4.42758529884658e-06	0.000229538703332428	0	102.5	FFPE-ATAC in FFPE liver
peak_66066	chr5	14951552	14951805	12.4287287881506	6.96273851511141	1.51686059279885	4.59022968107046	4.42758529884658e-06	0.000229538703332428	0	49.5	FFPE-ATAC in FFPE liver
peak_83765	chr8	19906903	19907206	12.4287287881506	6.96273851511141	1.51686059279885	4.59022968107046	4.42758529884658e-06	0.000229538703332428	0	59	FFPE-ATAC in FFPE liver
peak_21217	chr12	110493732	110494191	12.430198332108	6.96285903033293	1.51710245952864	4.5895773133848	4.44144472463201e-06	0.000229538703332428	0	90	FFPE-ATAC in FFPE liver
peak_23351	chr13	46479919	46480363	12.430198332108	6.96285903033293	1.51710245952864	4.5895773133848	4.44144472463201e-06	0.000229538703332428	1	86.5	FFPE-ATAC in FFPE liver
peak_23711	chr13	54115035	54115950	12.430198332108	6.96285903033293	1.51710245952864	4.5895773133848	4.44144472463201e-06	0.000229538703332428	0	178.5	FFPE-ATAC in FFPE liver
peak_28798	chr14	72262871	72263229	12.430198332108	6.96285903033293	1.51710245952864	4.5895773133848	4.44144472463201e-06	0.000229538703332428	0	69.5	FFPE-ATAC in FFPE liver
peak_35057	chr16	26976760	26976986	12.430198332108	6.96285903033293	1.51710245952864	4.5895773133848	4.44144472463201e-06	0.000229538703332428	0	44	FFPE-ATAC in FFPE liver
peak_13476	chr11	55914259	55914681	12.4279940161719	6.96267820851791	1.51708088469811	4.58952339242179	4.44259212293518e-06	0.000229538703332428	0	83	FFPE-ATAC in FFPE liver
peak_866	chr1	40781485	40782033	12.4309331040867	6.96291963945881	1.51756602720923	4.58821528330038	4.47051489087205e-06	0.00023070918693683	1	108	FFPE-ATAC in FFPE liver
peak_4111	chr1	145718637	145719080	12.4309331040867	6.96291963945881	1.51756602720923	4.58821528330038	4.47051489087205e-06	0.00023070918693683	0	87	FFPE-ATAC in FFPE liver
peak_26168	chr14	8839290	8839665	12.4272592441932	6.96261760243536	1.51753005792351	4.58812500357494	4.47244818279864e-06	0.00023070918693683	2	72.5	FFPE-ATAC in FFPE liver
peak_22085	chr13	15800921	15801358	12.4316678760654	6.96298074466038	1.51826130837657	4.58615437688107	4.51484820094722e-06	0.00023241956991254	1	84.5	FFPE-ATAC in FFPE liver
peak_26028	chr13	120282928	120283264	18.1684289346834	5.02416713388653	1.09683132235242	4.58061967368963	4.63600243204239e-06	0.000237742318956317	3	92.5	FFPE-ATAC in FFPE liver
peak_44275	chr18	81410441	81410827	18.1684289346834	5.02416713388653	1.09683132235242	4.58061967368963	4.63600243204239e-06	0.000237742318956317	3.5	106.5	FFPE-ATAC in FFPE liver
peak_16549	chr11	106445489	106445932	18.1747095549716	5.02361585828879	1.09830344734147	4.57397804809668	4.78550001067012e-06	0.000244495545999692	7	123	FFPE-ATAC in FFPE liver
peak_4386	chr1	155900327	155900771	12.2031126073374	6.93629644022152	1.51780193826796	4.5699615116692	4.87813794314936e-06	0.0002471846205581	1	85	FFPE-ATAC in FFPE liver
peak_12727	chr11	34247955	34248376	12.2031126073374	6.93629644022152	1.51780193826796	4.5699615116692	4.87813794314936e-06	0.0002471846205581	2	79.5	FFPE-ATAC in FFPE liver
peak_30612	chr15	31119129	31119876	12.2031126073374	6.93629644022152	1.51780193826796	4.5699615116692	4.87813794314936e-06	0.0002471846205581	0	145.5	FFPE-ATAC in FFPE liver
peak_52957	chr2	153265352	153265758	12.2031126073374	6.93629644022152	1.51780193826796	4.5699615116692	4.87813794314936e-06	0.0002471846205581	1	78.5	FFPE-ATAC in FFPE liver
peak_61437	chr4	61107164	61107711	12.2031126073374	6.93629644022152	1.51780193826796	4.5699615116692	4.87813794314936e-06	0.0002471846205581	0	106.5	FFPE-ATAC in FFPE liver
peak_69232	chr5	112316706	112316927	12.2031126073374	6.93629644022152	1.51780193826796	4.5699615116692	4.87813794314936e-06	0.0002471846205581	0	42.5	FFPE-ATAC in FFPE liver
peak_77278	chr6	145131920	145132265	12.2031126073374	6.93629644022152	1.51780193826796	4.5699615116692	4.87813794314936e-06	0.0002471846205581	0	66	FFPE-ATAC in FFPE liver
peak_88447	chr8_random	375826	376035	12.2031126073374	6.93629644022152	1.51780193826796	4.5699615116692	4.87813794314936e-06	0.0002471846205581	0	40	FFPE-ATAC in FFPE liver
peak_45613	chr19	28048335	28048975	12.2038473793161	6.93635767811176	1.51792667354429	4.56962631924484	4.88594603468642e-06	0.0002471846205581	1	121.5	FFPE-ATAC in FFPE liver
peak_57950	chr3	110340645	110341064	12.2038473793161	6.93635767811176	1.51792667354429	4.56962631924484	4.88594603468642e-06	0.0002471846205581	1	80.5	FFPE-ATAC in FFPE liver
peak_65581	chr4	151239738	151240275	12.2038473793161	6.93635767811176	1.51792667354429	4.56962631924484	4.88594603468642e-06	0.0002471846205581	0	102.5	FFPE-ATAC in FFPE liver
peak_74012	chr6	72255929	72256535	12.2038473793161	6.93635767811176	1.51792667354429	4.56962631924484	4.88594603468642e-06	0.0002471846205581	1	116.5	FFPE-ATAC in FFPE liver
peak_84617	chr8	42455082	42455673	12.2038473793161	6.93635767811176	1.51792667354429	4.56962631924484	4.88594603468642e-06	0.0002471846205581	0	114	FFPE-ATAC in FFPE liver
peak_84630	chr8	43796864	43797235	12.2038473793161	6.93635767811176	1.51792667354429	4.56962631924484	4.88594603468642e-06	0.0002471846205581	0	70.5	FFPE-ATAC in FFPE liver
peak_93440	chr9	123782084	123782446	12.2038473793161	6.93635767811176	1.51792667354429	4.56962631924484	4.88594603468642e-06	0.0002471846205581	0	69.5	FFPE-ATAC in FFPE liver
peak_243	chr1	16079783	16080367	12.2023778353587	6.93623520316445	1.51791211498123	4.56958946088273	4.88680535658472e-06	0.0002471846205581	0	112	FFPE-ATAC in FFPE liver
peak_39058	chr17	33426092	33426970	12.2045821512948	6.93641912607782	1.51828707701614	4.56858207586791	4.91034781531752e-06	0.000247670927368476	0	170	FFPE-ATAC in FFPE liver
peak_48273	chr2	25016500	25017035	12.2045821512948	6.93641912607782	1.51828707701614	4.56858207586791	4.91034781531752e-06	0.000247670927368476	0	102	FFPE-ATAC in FFPE liver
peak_83741	chr8	19736689	19737059	12.2045821512948	6.93641912607782	1.51828707701614	4.56858207586791	4.91034781531752e-06	0.000247670927368476	0	71	FFPE-ATAC in FFPE liver
peak_60176	chr4	31157102	31157615	12.20164306338	6.93617375756671	1.5182579517216	4.56850810476676	4.91208078462794e-06	0.000247670927368476	1	98	FFPE-ATAC in FFPE liver
peak_65233	chr4	147505386	147505757	12.20164306338	6.93617375756671	1.5182579517216	4.56850810476676	4.91208078462794e-06	0.000247670927368476	1	72	FFPE-ATAC in FFPE liver
peak_19127	chr12	56639336	56639939	12.2053169232735	6.93648099028834	1.51888541644505	4.56682308960682	4.95171574681021e-06	0.000249018348694306	1	116	FFPE-ATAC in FFPE liver
peak_37328	chr16	95725413	95725838	12.2053169232735	6.93648099028834	1.51888541644505	4.56682308960682	4.95171574681021e-06	0.000249018348694306	0.5	82	FFPE-ATAC in FFPE liver
peak_88464	chr8_random	702375	702880	12.2053169232735	6.93648099028834	1.51888541644505	4.56682308960682	4.95171574681021e-06	0.000249018348694306	0	97	FFPE-ATAC in FFPE liver
peak_30416	chr15	23348816	23349038	12.2009082914013	6.93611189659244	1.51884170986639	4.56671149569801	4.95435144641645e-06	0.000249018348694306	0	42.5	FFPE-ATAC in FFPE liver
peak_23471	chr13	48951961	48952375	17.945751841785	5.00574931555869	1.09924900867926	4.55379015676627	5.2687914344788e-06	0.000262480692746971	4	113	FFPE-ATAC in FFPE liver
peak_70467	chr5	130678639	130678878	16.7254018208975	3.50411950968225	0.769622604209631	4.55303611213554	5.28771920844822e-06	0.000263159187659395	6	58.5	FFPE-ATAC in FFPE liver
peak_91676	chr9	83832842	83833461	28.969097579779	6.72755542182235	1.47797649384298	4.55186902487846	5.31714346101274e-06	0.000264213092497542	3	278	FFPE-ATAC in FFPE liver
peak_430	chr1	27163657	27164117	11.9774964265242	6.90936055037182	1.51882288723966	4.54915488067803	5.38617906905857e-06	0.000266142187226389	0	86.5	FFPE-ATAC in FFPE liver
peak_23310	chr13	45885245	45885888	11.9774964265242	6.90936055037182	1.51882288723966	4.54915488067803	5.38617906905857e-06	0.000266142187226389	1	120.5	FFPE-ATAC in FFPE liver
peak_65020	chr4	141801317	141801863	11.9774964265242	6.90936055037182	1.51882288723966	4.54915488067803	5.38617906905857e-06	0.000266142187226389	1	103	FFPE-ATAC in FFPE liver
peak_92859	chr9	114037617	114037840	11.9774964265242	6.90936055037182	1.51882288723966	4.54915488067803	5.38617906905857e-06	0.000266142187226389	0	42	FFPE-ATAC in FFPE liver
peak_38145	chr17	20300885	20301266	11.9767616545455	6.90929830242958	1.51881551633772	4.54913597346555	5.38666297986702e-06	0.000266142187226389	0	71.5	FFPE-ATAC in FFPE liver
peak_41501	chr18	4198637	4199397	11.9767616545455	6.90929830242958	1.51881551633772	4.54913597346555	5.38666297986702e-06	0.000266142187226389	2	143.5	FFPE-ATAC in FFPE liver
peak_89861	chr9	47150469	47150854	11.9767616545455	6.90929830242958	1.51881551633772	4.54913597346555	5.38666297986702e-06	0.000266142187226389	1	72.5	FFPE-ATAC in FFPE liver
peak_96000	chrY_random	27352220	27352573	11.9767616545455	6.90929830242958	1.51881551633772	4.54913597346555	5.38666297986702e-06	0.000266142187226389	0	66	FFPE-ATAC in FFPE liver
peak_7215	chr10	22969611	22969963	11.9782311985029	6.9094229085485	1.51907335375122	4.54844586108123	5.40435421581392e-06	0.000266142187226389	0	66.5	FFPE-ATAC in FFPE liver
peak_8149	chr10	55543556	55543929	11.9782311985029	6.9094229085485	1.51907335375122	4.54844586108123	5.40435421581392e-06	0.000266142187226389	0.5	71	FFPE-ATAC in FFPE liver
peak_27161	chr14	33171375	33171595	11.9782311985029	6.9094229085485	1.51907335375122	4.54844586108123	5.40435421581392e-06	0.000266142187226389	0	41.5	FFPE-ATAC in FFPE liver
peak_50068	chr2	69328878	69329283	11.9782311985029	6.9094229085485	1.51907335375122	4.54844586108123	5.40435421581392e-06	0.000266142187226389	0	77	FFPE-ATAC in FFPE liver
peak_51225	chr2	105098909	105099231	11.9782311985029	6.9094229085485	1.51907335375122	4.54844586108123	5.40435421581392e-06	0.000266142187226389	0	61	FFPE-ATAC in FFPE liver
peak_88475	chr8_random	789920	790216	11.9782311985029	6.9094229085485	1.51907335375122	4.54844586108123	5.40435421581392e-06	0.000266142187226389	0	56	FFPE-ATAC in FFPE liver
peak_20780	chr12	103615546	103615982	11.9760268825668	6.90923594584164	1.519051236191	4.54838900836976	5.40581412942406e-06	0.000266142187226389	1	81.5	FFPE-ATAC in FFPE liver
peak_46741	chr19	46538636	46538873	11.9760268825668	6.90923594584164	1.519051236191	4.54838900836976	5.40581412942406e-06	0.000266142187226389	0	44.5	FFPE-ATAC in FFPE liver
peak_15019	chr11	83368667	83369722	11.9789659704816	6.90948559418628	1.51956854019197	4.54700489739897	5.44147325260861e-06	0.00026674076053948	3	198.5	FFPE-ATAC in FFPE liver
peak_37497	chr17	3033797	3034023	11.9789659704816	6.90948559418628	1.51956854019197	4.54700489739897	5.44147325260861e-06	0.00026674076053948	0	42	FFPE-ATAC in FFPE liver
peak_77083	chr6	142329078	142329697	11.9789659704816	6.90948559418628	1.51956854019197	4.54700489739897	5.44147325260861e-06	0.00026674076053948	0	118	FFPE-ATAC in FFPE liver
peak_79604	chr7	71628523	71628741	11.9789659704816	6.90948559418628	1.51956854019197	4.54700489739897	5.44147325260861e-06	0.00026674076053948	0	41.5	FFPE-ATAC in FFPE liver
peak_85131	chr8	66077286	66077845	11.9789659704816	6.90948559418628	1.51956854019197	4.54700489739897	5.44147325260861e-06	0.00026674076053948	0	104.5	FFPE-ATAC in FFPE liver
peak_85390	chr8	72972885	72973112	11.9789659704816	6.90948559418628	1.51956854019197	4.54700489739897	5.44147325260861e-06	0.00026674076053948	0	43	FFPE-ATAC in FFPE liver
peak_86585	chr8	98153842	98154248	11.9789659704816	6.90948559418628	1.51956854019197	4.54700489739897	5.44147325260861e-06	0.00026674076053948	0	77.5	FFPE-ATAC in FFPE liver
peak_57463	chr3	99784968	99785305	11.9752921105881	6.90917326301563	1.51953166242088	4.5469097050654	5.44393397015509e-06	0.00026674076053948	0	64	FFPE-ATAC in FFPE liver
peak_24134	chr13	63353470	63353778	16.2287641142818	3.80419807058384	0.83666849981996	4.54684032134884	5.44572820730536e-06	0.00026674076053948	8	73	FFPE-ATAC in FFPE liver
peak_83749	chr8	19778564	19778895	17.9505629181158	5.00508899749681	1.10088743928359	4.54641302906853	5.4567903121607e-06	0.000267010418828548	3	90.5	FFPE-ATAC in FFPE liver
peak_2141	chr1	84493448	84493978	11.9797007424603	6.90954881992342	1.52031170946586	4.54482378640036	5.49812307661441e-06	0.00026875921867182	0	100.5	FFPE-ATAC in FFPE liver
peak_88459	chr8_random	681494	682072	28.7427466269871	6.71613769622334	1.47822433172579	4.54338191577621	5.53588219004243e-06	0.000270329954383871	2	260.5	FFPE-ATAC in FFPE liver
peak_32937	chr15	85903510	85903790	11.980435514439	6.90961279300492	1.52130781375072	4.54189003076869	5.57521231090807e-06	0.000271974138833953	0.5	52.5	FFPE-ATAC in FFPE liver
peak_84955	chr8	57977238	57977567	11.980435514439	6.90961279300492	1.52130781375072	4.54189003076869	5.57521231090807e-06	0.000271974138833953	0	62.5	FFPE-ATAC in FFPE liver
peak_20905	chr12	105011391	105011633	16.1814867808765	4.24091630022526	0.933924666754625	4.54096186897214	5.59981598706396e-06	0.000273035776757393	4	58	FFPE-ATAC in FFPE liver
peak_71300	chr5	144175584	144176202	17.7157270290997	4.986648133981	1.09840125369578	4.53991482366074	5.62769577895212e-06	0.000273839402404484	9	165.5	FFPE-ATAC in FFPE liver
peak_80288	chr7	87530182	87530444	17.2176308956411	3.26229930315955	0.718864428571269	4.53812871175629	5.6755616929767e-06	0.000275610323303914	8.5	64	FFPE-ATAC in FFPE liver
peak_85292	chr8	71996450	71996866	11.973087794652	6.90898115184654	1.52249587161781	4.53793095971094	5.68088513724632e-06	0.000275615661545746	0	78	FFPE-ATAC in FFPE liver
peak_83757	chr8	19871525	19871725	17.7212728774091	4.98604954933219	1.09917191306313	4.53618718789609	5.72803445993297e-06	0.000277597361406192	2	54	FFPE-ATAC in FFPE liver
peak_78949	chr7	46583863	46584459	17.941756771486	3.08079411278306	0.680119125348541	4.52978603006385	5.90434513985011e-06	0.000284885919574605	26	149	FFPE-ATAC in FFPE liver
peak_30162	chr15	8701283	8701742	11.7511454737323	6.88184872415248	1.51979666778598	4.52813778975963	5.9505775772405e-06	0.000284885919574605	0	84.5	FFPE-ATAC in FFPE liver
peak_37874	chr17	11594816	11595276	11.7511454737323	6.88184872415248	1.51979666778598	4.52813778975963	5.9505775772405e-06	0.000284885919574605	0	85	FFPE-ATAC in FFPE liver
peak_41959	chr18	15072114	15072739	11.7511454737323	6.88184872415248	1.51979666778598	4.52813778975963	5.9505775772405e-06	0.000284885919574605	0	116	FFPE-ATAC in FFPE liver
peak_84628	chr8	43370789	43371158	11.7511454737323	6.88184872415248	1.51979666778598	4.52813778975963	5.9505775772405e-06	0.000284885919574605	1	69	FFPE-ATAC in FFPE liver
peak_91236	chr9	71171462	71172016	11.7511454737323	6.88184872415248	1.51979666778598	4.52813778975963	5.9505775772405e-06	0.000284885919574605	0	103	FFPE-ATAC in FFPE liver
peak_8716	chr10	67687653	67688478	11.751880245711	6.88191207159515	1.51992977075143	4.52778293051844	5.96057645361694e-06	0.000284885919574605	2	151.5	FFPE-ATAC in FFPE liver
peak_12267	chr11	19135716	19136104	11.751880245711	6.88191207159515	1.51992977075143	4.52778293051844	5.96057645361694e-06	0.000284885919574605	0	71.5	FFPE-ATAC in FFPE liver
peak_16010	chr11	99503161	99503558	11.751880245711	6.88191207159515	1.51992977075143	4.52778293051844	5.96057645361694e-06	0.000284885919574605	0	73.5	FFPE-ATAC in FFPE liver
peak_17716	chr12	3320785	3321624	11.751880245711	6.88191207159515	1.51992977075143	4.52778293051844	5.96057645361694e-06	0.000284885919574605	0	155	FFPE-ATAC in FFPE liver
peak_36354	chr16	62832859	62833660	11.751880245711	6.88191207159515	1.51992977075143	4.52778293051844	5.96057645361694e-06	0.000284885919574605	3.5	148.5	FFPE-ATAC in FFPE liver
peak_40316	chr17	66196421	66197007	11.751880245711	6.88191207159515	1.51992977075143	4.52778293051844	5.96057645361694e-06	0.000284885919574605	0.5	107	FFPE-ATAC in FFPE liver
peak_45022	chr19	10070766	10071358	11.751880245711	6.88191207159515	1.51992977075143	4.52778293051844	5.96057645361694e-06	0.000284885919574605	2	108	FFPE-ATAC in FFPE liver
peak_50968	chr2	101498102	101498328	11.751880245711	6.88191207159515	1.51992977075143	4.52778293051844	5.96057645361694e-06	0.000284885919574605	0	41.5	FFPE-ATAC in FFPE liver
peak_60215	chr4	32443606	32444161	11.751880245711	6.88191207159515	1.51992977075143	4.52778293051844	5.96057645361694e-06	0.000284885919574605	0	103	FFPE-ATAC in FFPE liver
peak_65490	chr4	150018927	150019381	11.751880245711	6.88191207159515	1.51992977075143	4.52778293051844	5.96057645361694e-06	0.000284885919574605	1	84	FFPE-ATAC in FFPE liver
peak_68891	chr5	104759734	104761338	11.751880245711	6.88191207159515	1.51992977075143	4.52778293051844	5.96057645361694e-06	0.000284885919574605	5	296	FFPE-ATAC in FFPE liver
peak_83224	chr8	3556119	3556491	11.751880245711	6.88191207159515	1.51992977075143	4.52778293051844	5.96057645361694e-06	0.000284885919574605	1	69	FFPE-ATAC in FFPE liver
peak_93665	chrUn_random	5732872	5733228	11.751880245711	6.88191207159515	1.51992977075143	4.52778293051844	5.96057645361694e-06	0.000284885919574605	0	66	FFPE-ATAC in FFPE liver
peak_95508	chrX	145312870	145313321	11.751880245711	6.88191207159515	1.51992977075143	4.52778293051844	5.96057645361694e-06	0.000284885919574605	0	83	FFPE-ATAC in FFPE liver
peak_11103	chr10	118388585	118389732	11.7504107017536	6.88178537749058	1.51991483501039	4.52774406760991	5.96167247101608e-06	0.000284885919574605	1	213.5	FFPE-ATAC in FFPE liver
peak_94664	chrX	72975435	72975653	11.7504107017536	6.88178537749058	1.51991483501039	4.52774406760991	5.96167247101608e-06	0.000284885919574605	0	40.5	FFPE-ATAC in FFPE liver
peak_1551	chr1	65162265	65163091	11.7526150176897	6.88197564808683	1.52031502038655	4.52667740290895	5.99183011090678e-06	0.000284885919574605	3	152	FFPE-ATAC in FFPE liver
peak_12787	chr11	36011257	36011688	11.7526150176897	6.88197564808683	1.52031502038655	4.52667740290895	5.99183011090678e-06	0.000284885919574605	0	79	FFPE-ATAC in FFPE liver
peak_20547	chr12	94815358	94815737	11.7526150176897	6.88197564808683	1.52031502038655	4.52667740290895	5.99183011090678e-06	0.000284885919574605	0	70.5	FFPE-ATAC in FFPE liver
peak_37749	chr17	8323716	8324173	11.7526150176897	6.88197564808683	1.52031502038655	4.52667740290895	5.99183011090678e-06	0.000284885919574605	0	85.5	FFPE-ATAC in FFPE liver
peak_73110	chr6	45394675	45395236	11.7526150176897	6.88197564808683	1.52031502038655	4.52667740290895	5.99183011090678e-06	0.000284885919574605	1	104	FFPE-ATAC in FFPE liver
peak_76876	chr6	137882921	137883316	11.7526150176897	6.88197564808683	1.52031502038655	4.52667740290895	5.99183011090678e-06	0.000284885919574605	0	74	FFPE-ATAC in FFPE liver
peak_79805	chr7	75315211	75315449	11.7526150176897	6.88197564808683	1.52031502038655	4.52667740290895	5.99183011090678e-06	0.000284885919574605	0	43.5	FFPE-ATAC in FFPE liver
peak_28696	chr14	70370157	70370565	11.7496759297749	6.88172180321152	1.52028513799603	4.52659940639997	5.99404101246437e-06	0.000284885919574605	0	75.5	FFPE-ATAC in FFPE liver
peak_47895	chr2	11383424	11383849	11.7496759297749	6.88172180321152	1.52028513799603	4.52659940639997	5.99404101246437e-06	0.000284885919574605	1	78.5	FFPE-ATAC in FFPE liver
peak_68076	chr5	78641861	78642083	11.7496759297749	6.88172180321152	1.52028513799603	4.52659940639997	5.99404101246437e-06	0.000284885919574605	0	41	FFPE-ATAC in FFPE liver
peak_39894	chr17	50484940	50485598	11.7533497896684	6.88203967855638	1.52095504472124	4.52481465671309	6.04484566304384e-06	0.000286733345463889	0	122	FFPE-ATAC in FFPE liver
peak_63877	chr4	129588380	129588723	11.7533497896684	6.88203967855638	1.52095504472124	4.52481465671309	6.04484566304384e-06	0.000286733345463889	0	63.5	FFPE-ATAC in FFPE liver
peak_38042	chr17	15114734	15115093	11.7489411577962	6.88165777565968	1.52091019593133	4.52469698347026	6.04820978830295e-06	0.000286751384842373	0	67	FFPE-ATAC in FFPE liver
peak_55497	chr3	40754112	40754312	15.9144320959429	-3.18041037789038	0.702984859971809	-4.52415202514876	6.06381281535298e-06	0.000287069264685649	58	4.5	standard ATAC in FFPE liver
peak_9916	chr10	87379212	87379541	17.2213047555345	3.26253829472745	0.721830226760818	4.51981390328852	6.18940135367033e-06	0.000292148255840091	11.5	80	FFPE-ATAC in FFPE liver
peak_62106	chr4	88439628	88440550	15.9510595237325	4.22021869732901	0.935185980643614	4.51270526363598	6.40059397813505e-06	0.000300640216269176	14	222	FFPE-ATAC in FFPE liver
peak_19090	chr12	56255611	56256803	11.5255292929191	6.85386659496977	1.52086091000131	4.50657029179866	6.58838665553235e-06	0.000306598952662435	0	214.5	FFPE-ATAC in FFPE liver
peak_33461	chr15	97751008	97752078	11.5255292929191	6.85386659496977	1.52086091000131	4.50657029179866	6.58838665553235e-06	0.000306598952662435	1	195	FFPE-ATAC in FFPE liver
peak_59338	chr3	149757983	149758414	11.5255292929191	6.85386659496977	1.52086091000131	4.50657029179866	6.58838665553235e-06	0.000306598952662435	0	78	FFPE-ATAC in FFPE liver
peak_64734	chr4	138894054	138894426	11.5255292929191	6.85386659496977	1.52086091000131	4.50657029179866	6.58838665553235e-06	0.000306598952662435	0	67	FFPE-ATAC in FFPE liver
peak_11886	chr11	4879581	4880161	11.5247945209404	6.85380217102837	1.52085327445979	4.50655055693184	6.58899916398144e-06	0.000306598952662435	1.5	105.5	FFPE-ATAC in FFPE liver
peak_18477	chr12	28065729	28066124	11.5247945209404	6.85380217102837	1.52085327445979	4.50655055693184	6.58899916398144e-06	0.000306598952662435	0	72	FFPE-ATAC in FFPE liver
peak_40294	chr17	65911269	65911876	11.5247945209404	6.85380217102837	1.52085327445979	4.50655055693184	6.58899916398144e-06	0.000306598952662435	0	110	FFPE-ATAC in FFPE liver
peak_41426	chr17	90991895	90993488	11.5247945209404	6.85380217102837	1.52085327445979	4.50655055693184	6.58899916398144e-06	0.000306598952662435	5	288	FFPE-ATAC in FFPE liver
peak_43203	chr18	56098974	56099432	11.5247945209404	6.85380217102837	1.52085327445979	4.50655055693184	6.58899916398144e-06	0.000306598952662435	0	83.5	FFPE-ATAC in FFPE liver
peak_55210	chr3	30782304	30783637	11.5247945209404	6.85380217102837	1.52085327445979	4.50655055693184	6.58899916398144e-06	0.000306598952662435	4.5	241.5	FFPE-ATAC in FFPE liver
peak_78932	chr7	39321894	39322228	11.5247945209404	6.85380217102837	1.52085327445979	4.50655055693184	6.58899916398144e-06	0.000306598952662435	0	60.5	FFPE-ATAC in FFPE liver
peak_359	chr1	22891326	22891710	11.5262640648978	6.8539311393136	1.52112885360184	4.50581890093292	6.61174596243094e-06	0.000306598952662435	0.5	69	FFPE-ATAC in FFPE liver
peak_48537	chr2	28079877	28080254	11.5262640648978	6.8539311393136	1.52112885360184	4.50581890093292	6.61174596243094e-06	0.000306598952662435	1	69	FFPE-ATAC in FFPE liver
peak_50165	chr2	71188479	71188852	11.5262640648978	6.8539311393136	1.52112885360184	4.50581890093292	6.61174596243094e-06	0.000306598952662435	1	67	FFPE-ATAC in FFPE liver
peak_66417	chr5	25209694	25210100	11.5262640648978	6.8539311393136	1.52112885360184	4.50581890093292	6.61174596243094e-06	0.000306598952662435	0	73	FFPE-ATAC in FFPE liver
peak_68237	chr5	89372977	89373208	11.5262640648978	6.8539311393136	1.52112885360184	4.50581890093292	6.61174596243094e-06	0.000306598952662435	0.5	42	FFPE-ATAC in FFPE liver
peak_9639	chr10	82417878	82418241	11.5240597489617	6.85373762825884	1.52110594005387	4.50575955808581	6.61359419022733e-06	0.000306598952662435	0	66.5	FFPE-ATAC in FFPE liver
peak_59056	chr3	143891547	143892092	11.5240597489617	6.85373762825884	1.52110594005387	4.50575955808581	6.61359419022733e-06	0.000306598952662435	0	97.5	FFPE-ATAC in FFPE liver
peak_67203	chr5	50014708	50015141	11.5240597489617	6.85373762825884	1.52110594005387	4.50575955808581	6.61359419022733e-06	0.000306598952662435	0.5	78	FFPE-ATAC in FFPE liver
peak_78941	chr7	46449055	46449315	11.5240597489617	6.85373762825884	1.52110594005387	4.50575955808581	6.61359419022733e-06	0.000306598952662435	0	46.5	FFPE-ATAC in FFPE liver
peak_88474	chr8_random	783761	784624	11.5240597489617	6.85373762825884	1.52110594005387	4.50575955808581	6.61359419022733e-06	0.000306598952662435	2	156.5	FFPE-ATAC in FFPE liver
peak_19411	chr12	71932835	71933295	11.5269988368765	6.85399604150194	1.52165899292088	4.50429174564626	6.65946670043596e-06	0.000307387211986695	1	84	FFPE-ATAC in FFPE liver
peak_24277	chr13	65883457	65884056	11.5269988368765	6.85399604150194	1.52165899292088	4.50429174564626	6.65946670043596e-06	0.000307387211986695	0	108.5	FFPE-ATAC in FFPE liver
peak_51224	chr2	105097977	105098792	11.5269988368765	6.85399604150194	1.52165899292088	4.50429174564626	6.65946670043596e-06	0.000307387211986695	1	147.5	FFPE-ATAC in FFPE liver
peak_76994	chr6	140567198	140567546	11.5269988368765	6.85399604150194	1.52165899292088	4.50429174564626	6.65946670043596e-06	0.000307387211986695	0	63	FFPE-ATAC in FFPE liver
peak_91624	chr9	82574367	82575081	11.5269988368765	6.85399604150194	1.52165899292088	4.50429174564626	6.65946670043596e-06	0.000307387211986695	0	128.5	FFPE-ATAC in FFPE liver
peak_93599	chrUn_random	5161726	5162571	11.5269988368765	6.85399604150194	1.52165899292088	4.50429174564626	6.65946670043596e-06	0.000307387211986695	1	154.5	FFPE-ATAC in FFPE liver
peak_92964	chr9	115890435	115890818	11.523324976983	6.85367272882953	1.5216207817766	4.50419237888389	6.66258311552606e-06	0.000307387211986695	0	70	FFPE-ATAC in FFPE liver
peak_96044	chrY_random	40763204	40763561	11.523324976983	6.85367272882953	1.5216207817766	4.50419237888389	6.66258311552606e-06	0.000307387211986695	0	64.5	FFPE-ATAC in FFPE liver
peak_66099	chr5	15184894	15185128	11.5277336088552	6.85406153403417	1.52245512095889	4.50197936193827	6.73235203838258e-06	0.000309565787364901	0	43	FFPE-ATAC in FFPE liver
peak_75605	chr6	114528582	114528794	11.5277336088552	6.85406153403417	1.52245512095889	4.50197936193827	6.73235203838258e-06	0.000309565787364901	0	38	FFPE-ATAC in FFPE liver
peak_83751	chr8	19800715	19802039	11.5277336088552	6.85406153403417	1.52245512095889	4.50197936193827	6.73235203838258e-06	0.000309565787364901	1	242	FFPE-ATAC in FFPE liver
peak_93643	chrUn_random	5482192	5483061	11.5277336088552	6.85406153403417	1.52245512095889	4.50197936193827	6.73235203838258e-06	0.000309565787364901	1	155	FFPE-ATAC in FFPE liver
peak_21204	chr12	110077094	110077322	11.5284683808339	6.8541278442251	1.52352300031468	4.49886732449027	6.83164746168921e-06	0.000313118714435017	0	42	FFPE-ATAC in FFPE liver
peak_88322	chr8	129414970	129415488	11.5284683808339	6.8541278442251	1.52352300031468	4.49886732449027	6.83164746168921e-06	0.000313118714435017	1	95.5	FFPE-ATAC in FFPE liver
peak_93591	chrUn_random	4767709	4768016	27.614333395401	6.65737281663839	1.47979663719853	4.49884304997595	6.83242746425913e-06	0.000313118714435017	1	132	FFPE-ATAC in FFPE liver
peak_77707	chr7	7250005	7250658	17.2659642114307	4.94830887922976	1.10025167096467	4.49743364160604	6.87786172802108e-06	0.000315050651947703	4	171	FFPE-ATAC in FFPE liver
peak_5000	chr1	169270275	169270796	17.7176101346302	3.06044401368934	0.681223881615571	4.49256712261948	7.03697284918294e-06	0.000320657735776282	21	130	FFPE-ATAC in FFPE liver
peak_93601	chrUn_random	5168279	5168573	27.3901867585452	6.64547218494359	1.47979220882441	4.49081441658821	7.09513527676594e-06	0.000323001748160948	2	125.5	FFPE-ATAC in FFPE liver
peak_3187	chr1	127098495	127098782	11.2991783401272	6.82526526793838	1.52173168335253	4.48519626857057	7.28468482864964e-06	0.000327314291620652	0	51	FFPE-ATAC in FFPE liver
peak_11482	chr10	126547089	126547542	11.2991783401272	6.82526526793838	1.52173168335253	4.48519626857057	7.28468482864964e-06	0.000327314291620652	1	80.5	FFPE-ATAC in FFPE liver
peak_19302	chr12	70376955	70377796	11.2991783401272	6.82526526793838	1.52173168335253	4.48519626857057	7.28468482864964e-06	0.000327314291620652	0	148.5	FFPE-ATAC in FFPE liver
peak_32976	chr15	86130198	86130419	11.2991783401272	6.82526526793838	1.52173168335253	4.48519626857057	7.28468482864964e-06	0.000327314291620652	0	39	FFPE-ATAC in FFPE liver
peak_56943	chr3	89571087	89571457	11.2991783401272	6.82526526793838	1.52173168335253	4.48519626857057	7.28468482864964e-06	0.000327314291620652	0	66.5	FFPE-ATAC in FFPE liver
peak_61374	chr4	60311749	60312376	11.2991783401272	6.82526526793838	1.52173168335253	4.48519626857057	7.28468482864964e-06	0.000327314291620652	1	112	FFPE-ATAC in FFPE liver
peak_67863	chr5	74090198	74090741	11.2991783401272	6.82526526793838	1.52173168335253	4.48519626857057	7.28468482864964e-06	0.000327314291620652	0	96	FFPE-ATAC in FFPE liver
peak_70541	chr5	133624054	133624281	11.2991783401272	6.82526526793838	1.52173168335253	4.48519626857057	7.28468482864964e-06	0.000327314291620652	0	40	FFPE-ATAC in FFPE liver
peak_78923	chr7	39070711	39070915	11.2991783401272	6.82526526793838	1.52173168335253	4.48519626857057	7.28468482864964e-06	0.000327314291620652	0	36	FFPE-ATAC in FFPE liver
peak_433	chr1	28200950	28201188	11.2999131121059	6.82533082202831	1.52187468103876	4.48481790719434	7.29762283892583e-06	0.000327314291620652	0	42.5	FFPE-ATAC in FFPE liver
peak_5115	chr1	172320137	172320607	11.2999131121059	6.82533082202831	1.52187468103876	4.48481790719434	7.29762283892583e-06	0.000327314291620652	1	82.5	FFPE-ATAC in FFPE liver
peak_23648	chr13	52378094	52378451	11.2999131121059	6.82533082202831	1.52187468103876	4.48481790719434	7.29762283892583e-06	0.000327314291620652	0	63.5	FFPE-ATAC in FFPE liver
peak_25338	chr13	102822690	102823615	11.2999131121059	6.82533082202831	1.52187468103876	4.48481790719434	7.29762283892583e-06	0.000327314291620652	1	166.5	FFPE-ATAC in FFPE liver
peak_35728	chr16	37865309	37865942	11.2999131121059	6.82533082202831	1.52187468103876	4.48481790719434	7.29762283892583e-06	0.000327314291620652	2.5	114	FFPE-ATAC in FFPE liver
peak_36421	chr16	69619474	69620305	11.2999131121059	6.82533082202831	1.52187468103876	4.48481790719434	7.29762283892583e-06	0.000327314291620652	0	146	FFPE-ATAC in FFPE liver
peak_53696	chr2	165440281	165440794	11.2999131121059	6.82533082202831	1.52187468103876	4.48481790719434	7.29762283892583e-06	0.000327314291620652	0	90.5	FFPE-ATAC in FFPE liver
peak_61458	chr4	61263314	61263804	11.2999131121059	6.82533082202831	1.52187468103876	4.48481790719434	7.29762283892583e-06	0.000327314291620652	0	87.5	FFPE-ATAC in FFPE liver
peak_83105	chr7	151071873	151072086	11.2999131121059	6.82533082202831	1.52187468103876	4.48481790719434	7.29762283892583e-06	0.000327314291620652	0	38	FFPE-ATAC in FFPE liver
peak_92375	chr9	105721556	105722029	11.2999131121059	6.82533082202831	1.52187468103876	4.48481790719434	7.29762283892583e-06	0.000327314291620652	0	83.5	FFPE-ATAC in FFPE liver
peak_29208	chr14	91826649	91827008	11.2984435681485	6.82519971513742	1.52185765990332	4.48478191815325	7.29885462262032e-06	0.000327314291620652	0	64	FFPE-ATAC in FFPE liver
peak_47506	chr1_random	1080416	1080737	11.2984435681485	6.82519971513742	1.52185765990332	4.48478191815325	7.29885462262032e-06	0.000327314291620652	0	57.5	FFPE-ATAC in FFPE liver
peak_56537	chr3	82927884	82928255	11.2984435681485	6.82519971513742	1.52185765990332	4.48478191815325	7.29885462262032e-06	0.000327314291620652	1	66.5	FFPE-ATAC in FFPE liver
peak_95233	chrX	129846021	129846390	11.2984435681485	6.82519971513742	1.52185765990332	4.48478191815325	7.29885462262032e-06	0.000327314291620652	0	65	FFPE-ATAC in FFPE liver
peak_25214	chr13	100572684	100573341	11.3006478840846	6.82539662784337	1.5222876823387	4.48364439063022	7.33789098170923e-06	0.000327952053528752	0.5	119	FFPE-ATAC in FFPE liver
peak_34195	chr16	8899258	8900022	11.3006478840846	6.82539662784337	1.5222876823387	4.48364439063022	7.33789098170923e-06	0.000327952053528752	0	137	FFPE-ATAC in FFPE liver
peak_52560	chr2	144045685	144046078	11.3006478840846	6.82539662784337	1.5222876823387	4.48364439063022	7.33789098170923e-06	0.000327952053528752	1	71	FFPE-ATAC in FFPE liver
peak_64742	chr4	138951686	138952129	11.3006478840846	6.82539662784337	1.5222876823387	4.48364439063022	7.33789098170923e-06	0.000327952053528752	1	79	FFPE-ATAC in FFPE liver
peak_14042	chr11	68651270	68651641	11.2977087961699	6.82513391305375	1.52225361260725	4.48357215678664	7.34037654929496e-06	0.000327952053528752	1	65	FFPE-ATAC in FFPE liver
peak_41460	chr17_random	348071	348620	11.2977087961699	6.82513391305375	1.52225361260725	4.48357215678664	7.34037654929496e-06	0.000327952053528752	0	97.5	FFPE-ATAC in FFPE liver
peak_78848	chr7	37322112	37322569	11.2977087961699	6.82513391305375	1.52225361260725	4.48357215678664	7.34037654929496e-06	0.000327952053528752	0	81	FFPE-ATAC in FFPE liver
peak_59791	chr4	8948686	8949252	11.3013826560633	6.82546293218534	1.52297376010279	4.4816681094523	7.40618592112471e-06	0.000330140446497763	0.5	100.5	FFPE-ATAC in FFPE liver
peak_62566	chr4	102943489	102944539	11.3013826560633	6.82546293218534	1.52297376010279	4.4816681094523	7.40618592112471e-06	0.000330140446497763	1	190	FFPE-ATAC in FFPE liver
peak_87142	chr8	113322780	113323350	11.3013826560633	6.82546293218534	1.52297376010279	4.4816681094523	7.40618592112471e-06	0.000330140446497763	0	102	FFPE-ATAC in FFPE liver
peak_2790	chr1	104832619	104832840	11.2969740241912	6.8250676140616	1.52292258945261	4.48155911622189	7.40997006405356e-06	0.000330140446497763	0	39.5	FFPE-ATAC in FFPE liver
peak_51341	chr2	112063539	112063909	11.2969740241912	6.8250676140616	1.52292258945261	4.48155911622189	7.40997006405356e-06	0.000330140446497763	1	66	FFPE-ATAC in FFPE liver
peak_83420	chr8	11169991	11170342	15.7753274367193	3.76036123530996	0.839383900771868	4.47990631206062	7.46758096982115e-06	0.0003325530427997	8.5	80.5	FFPE-ATAC in FFPE liver
peak_40836	chr17	80372029	80372578	11.302117428042	6.82552997602196	1.52393807756798	4.47887619352268	7.50370365013007e-06	0.0003333892409546	0	99.5	FFPE-ATAC in FFPE liver
peak_44387	chr18	84328118	84328627	11.302117428042	6.82552997602196	1.52393807756798	4.47887619352268	7.50370365013007e-06	0.0003333892409546	0	90	FFPE-ATAC in FFPE liver
peak_79503	chr7	66929867	66930149	11.302117428042	6.82552997602196	1.52393807756798	4.47887619352268	7.50370365013007e-06	0.0003333892409546	0	50.5	FFPE-ATAC in FFPE liver
peak_37969	chr17	13560555	13560957	11.3028522000207	6.82559797461804	1.52518799355351	4.47525026650335	7.6321860642767e-06	0.000338471779025897	0	72.5	FFPE-ATAC in FFPE liver
peak_44745	chr19	5809188	5809559	17.0359393987453	4.92842789805625	1.10176020161649	4.47323100873069	7.70464628991391e-06	0.000341055696800234	4	95.5	FFPE-ATAC in FFPE liver
peak_47167	chr19	55879006	55879288	15.7228365825247	4.19939993819455	0.939552626616639	4.46957394320394	7.83755610227016e-06	0.000345824066363805	4	66	FFPE-ATAC in FFPE liver
peak_8586	chr10	64980633	64981137	11.0735621593141	6.79615225556011	1.52247057451044	4.46389727942391	8.04821597140859e-06	0.000349019966261985	0	87	FFPE-ATAC in FFPE liver
peak_12833	chr11	41445989	41446360	11.0735621593141	6.79615225556011	1.52247057451044	4.46389727942391	8.04821597140859e-06	0.000349019966261985	0	63.5	FFPE-ATAC in FFPE liver
peak_33846	chr15	102221617	102221925	11.0735621593141	6.79615225556011	1.52247057451044	4.46389727942391	8.04821597140859e-06	0.000349019966261985	0	54	FFPE-ATAC in FFPE liver
peak_38052	chr17	15177494	15177869	11.0735621593141	6.79615225556011	1.52247057451044	4.46389727942391	8.04821597140859e-06	0.000349019966261985	0	65	FFPE-ATAC in FFPE liver
peak_80672	chr7	99485089	99485644	11.0735621593141	6.79615225556011	1.52247057451044	4.46389727942391	8.04821597140859e-06	0.000349019966261985	1	97.5	FFPE-ATAC in FFPE liver
peak_83913	chr8	25042133	25042527	11.0735621593141	6.79615225556011	1.52247057451044	4.46389727942391	8.04821597140859e-06	0.000349019966261985	0	68	FFPE-ATAC in FFPE liver
peak_5408	chr1	176854356	176854635	11.0728273873354	6.79608567064143	1.52246129003369	4.46388076670971	8.04883657791902e-06	0.000349019966261985	0	48.5	FFPE-ATAC in FFPE liver
peak_7515	chr10	32143292	32143777	11.0728273873354	6.79608567064143	1.52246129003369	4.46388076670971	8.04883657791902e-06	0.000349019966261985	0	84	FFPE-ATAC in FFPE liver
peak_17052	chr11	114890490	114890839	11.0728273873354	6.79608567064143	1.52246129003369	4.46388076670971	8.04883657791902e-06	0.000349019966261985	0	60	FFPE-ATAC in FFPE liver
peak_22074	chr13	14649780	14650339	11.0728273873354	6.79608567064143	1.52246129003369	4.46388076670971	8.04883657791902e-06	0.000349019966261985	0	97.5	FFPE-ATAC in FFPE liver
peak_39880	chr17	50240081	50240498	11.0728273873354	6.79608567064143	1.52246129003369	4.46388076670971	8.04883657791902e-06	0.000349019966261985	0	73	FFPE-ATAC in FFPE liver
peak_52639	chr2	146044475	146044836	11.0728273873354	6.79608567064143	1.52246129003369	4.46388076670971	8.04883657791902e-06	0.000349019966261985	0.5	63.5	FFPE-ATAC in FFPE liver
peak_68591	chr5	98146349	98146958	11.0728273873354	6.79608567064143	1.52246129003369	4.46388076670971	8.04883657791902e-06	0.000349019966261985	0	105.5	FFPE-ATAC in FFPE liver
peak_77558	chr7	4056134	4056665	11.0728273873354	6.79608567064143	1.52246129003369	4.46388076670971	8.04883657791902e-06	0.000349019966261985	1	92	FFPE-ATAC in FFPE liver
peak_89113	chr9	29513685	29514519	11.0728273873354	6.79608567064143	1.52246129003369	4.46388076670971	8.04883657791902e-06	0.000349019966261985	0	146.5	FFPE-ATAC in FFPE liver
peak_6730	chr10	11070297	11070716	26.7133382161056	6.6089875178293	1.48063320764324	4.46362237704298	8.05855374101126e-06	0.000349019966261985	2	173.5	FFPE-ATAC in FFPE liver
peak_93606	chrUn_random	5174826	5175159	26.7118686721482	6.60892801995446	1.48067986179828	4.46344155172608	8.0653606397535e-06	0.000349019966261985	1	138.5	FFPE-ATAC in FFPE liver
peak_407	chr1	24337986	24338716	11.0742969312927	6.79621897434488	1.52275789826166	4.46309881702355	8.07827745972056e-06	0.000349019966261985	1	127.5	FFPE-ATAC in FFPE liver
peak_17474	chr11	119177207	119178042	11.0742969312927	6.79621897434488	1.52275789826166	4.46309881702355	8.07827745972056e-06	0.000349019966261985	0	144	FFPE-ATAC in FFPE liver
peak_18013	chr12	12805138	12805435	11.0742969312927	6.79621897434488	1.52275789826166	4.46309881702355	8.07827745972056e-06	0.000349019966261985	0	51.5	FFPE-ATAC in FFPE liver
peak_40721	chr17	78255378	78255847	11.0742969312927	6.79621897434488	1.52275789826166	4.46309881702355	8.07827745972056e-06	0.000349019966261985	1	81.5	FFPE-ATAC in FFPE liver
peak_52792	chr2	150041537	150042038	11.0742969312927	6.79621897434488	1.52275789826166	4.46309881702355	8.07827745972056e-06	0.000349019966261985	1	87	FFPE-ATAC in FFPE liver
peak_65187	chr4	146717876	146718097	11.0742969312927	6.79621897434488	1.52275789826166	4.46309881702355	8.07827745972056e-06	0.000349019966261985	0	38	FFPE-ATAC in FFPE liver
peak_65972	chr5	8083293	8083774	11.0742969312927	6.79621897434488	1.52275789826166	4.46309881702355	8.07827745972056e-06	0.000349019966261985	0	85	FFPE-ATAC in FFPE liver
peak_66086	chr5	15112685	15112959	11.0742969312927	6.79621897434488	1.52275789826166	4.46309881702355	8.07827745972056e-06	0.000349019966261985	0	47.5	FFPE-ATAC in FFPE liver
peak_71729	chr5	150161574	150162338	11.0742969312927	6.79621897434488	1.52275789826166	4.46309881702355	8.07827745972056e-06	0.000349019966261985	1	132.5	FFPE-ATAC in FFPE liver
peak_84907	chr8	50822230	50822935	11.0742969312927	6.79621897434488	1.52275789826166	4.46309881702355	8.07827745972056e-06	0.000349019966261985	0	122	FFPE-ATAC in FFPE liver
peak_85287	chr8	71945526	71945885	11.0742969312927	6.79621897434488	1.52275789826166	4.46309881702355	8.07827745972056e-06	0.000349019966261985	0	62.5	FFPE-ATAC in FFPE liver
peak_87290	chr8	116947875	116948604	11.0742969312927	6.79621897434488	1.52275789826166	4.46309881702355	8.07827745972056e-06	0.000349019966261985	1	127.5	FFPE-ATAC in FFPE liver
peak_93553	chrUn_random	4233395	4234390	11.0742969312927	6.79621897434488	1.52275789826166	4.46309881702355	8.07827745972056e-06	0.000349019966261985	0	175	FFPE-ATAC in FFPE liver
peak_2776	chr1	103309620	103309985	11.0720926153567	6.79601895542439	1.52273002365843	4.46304916159506	8.08015048876601e-06	0.000349019966261985	0	62.5	FFPE-ATAC in FFPE liver
peak_8208	chr10	57701833	57702589	11.0720926153567	6.79601895542439	1.52273002365843	4.46304916159506	8.08015048876601e-06	0.000349019966261985	0	131.5	FFPE-ATAC in FFPE liver
peak_24266	chr13	65687115	65687519	11.0720926153567	6.79601895542439	1.52273002365843	4.46304916159506	8.08015048876601e-06	0.000349019966261985	0	69	FFPE-ATAC in FFPE liver
peak_27751	chr14	51360633	51360864	11.0720926153567	6.79601895542439	1.52273002365843	4.46304916159506	8.08015048876601e-06	0.000349019966261985	0	40.5	FFPE-ATAC in FFPE liver
peak_93663	chrUn_random	5730733	5730965	11.0720926153567	6.79601895542439	1.52273002365843	4.46304916159506	8.08015048876601e-06	0.000349019966261985	0	40.5	FFPE-ATAC in FFPE liver
peak_40968	chr17	83503485	83504243	11.0750317032714	6.79628608921281	1.52332548958814	4.46147992380165	8.13955729131385e-06	0.000350596492567478	0	132.5	FFPE-ATAC in FFPE liver
peak_54246	chr2	172904005	172904428	11.0750317032714	6.79628608921281	1.52332548958814	4.46147992380165	8.13955729131385e-06	0.000350596492567478	0	73.5	FFPE-ATAC in FFPE liver
peak_55794	chr3	53487029	53487855	11.0750317032714	6.79628608921281	1.52332548958814	4.46147992380165	8.13955729131385e-06	0.000350596492567478	0	145.5	FFPE-ATAC in FFPE liver
peak_88480	chr8_random	829327	829531	11.0750317032714	6.79628608921281	1.52332548958814	4.46147992380165	8.13955729131385e-06	0.000350596492567478	0	35.5	FFPE-ATAC in FFPE liver
peak_93510	chrUn_random	3577935	3578776	11.0750317032714	6.79628608921281	1.52332548958814	4.46147992380165	8.13955729131385e-06	0.000350596492567478	1	146	FFPE-ATAC in FFPE liver
peak_59424	chr3	152146052	152146550	11.071357843378	6.79595184724125	1.52327896290652	4.46139677152378	8.14271681557732e-06	0.000350596492567478	1	87.5	FFPE-ATAC in FFPE liver
peak_22174	chr13	20328262	20328837	11.0757664752501	6.79635385706987	1.52417781466955	4.45902951194928	8.23315856317116e-06	0.000353224555463337	0	100.5	FFPE-ATAC in FFPE liver
peak_37964	chr17	13413778	13414064	11.0757664752501	6.79635385706987	1.52417781466955	4.45902951194928	8.23315856317116e-06	0.000353224555463337	0	50	FFPE-ATAC in FFPE liver
peak_38055	chr17	15190357	15190736	11.0757664752501	6.79635385706987	1.52417781466955	4.45902951194928	8.23315856317116e-06	0.000353224555463337	0.5	67	FFPE-ATAC in FFPE liver
peak_24293	chr13	66399584	66399913	11.0706230713993	6.79588408822249	1.52411253732137	4.45891226652218	8.23766281880779e-06	0.000353260094695701	0	56.5	FFPE-ATAC in FFPE liver
peak_32234	chr15	77241136	77241960	15.4998271621061	4.17655414962959	0.937413209324197	4.45540355958986	8.37355314375876e-06	0.000358447752437196	16	190.5	FFPE-ATAC in FFPE liver
peak_93575	chrUn_random	4533515	4533741	26.4877220352924	6.59661788436688	1.48094927297808	4.45431724416972	8.41605811983878e-06	0.000359946603218846	1	92.5	FFPE-ATAC in FFPE liver
peak_62100	chr4	88427866	88428865	15.5016991505221	4.17568038969947	0.937985793969503	4.45175227231132	8.51723928202777e-06	0.000363465243997084	13	231.5	FFPE-ATAC in FFPE liver
peak_74043	chr6	72455223	72455662	26.2572947781484	6.58437213122831	1.48128846498825	4.44503031438954	8.78794748461851e-06	0.00037357813096064	2	179.5	FFPE-ATAC in FFPE liver
peak_2161	chr1	85093511	85093781	10.8472112065222	6.76637166311142	1.52295151118645	4.4429330897345	8.87407688620862e-06	0.00037357813096064	0	46	FFPE-ATAC in FFPE liver
peak_6627	chr10	8270658	8270945	10.8472112065222	6.76637166311142	1.52295151118645	4.4429330897345	8.87407688620862e-06	0.00037357813096064	0	49.5	FFPE-ATAC in FFPE liver
peak_10906	chr10	114872513	114873271	10.8472112065222	6.76637166311142	1.52295151118645	4.4429330897345	8.87407688620862e-06	0.00037357813096064	2	129.5	FFPE-ATAC in FFPE liver
peak_11456	chr10	126345784	126346073	10.8472112065222	6.76637166311142	1.52295151118645	4.4429330897345	8.87407688620862e-06	0.00037357813096064	0	49.5	FFPE-ATAC in FFPE liver
peak_40410	chr17	68264255	68264632	10.8472112065222	6.76637166311142	1.52295151118645	4.4429330897345	8.87407688620862e-06	0.00037357813096064	1	63.5	FFPE-ATAC in FFPE liver
peak_42209	chr18	28316673	28317202	10.8472112065222	6.76637166311142	1.52295151118645	4.4429330897345	8.87407688620862e-06	0.00037357813096064	0	89.5	FFPE-ATAC in FFPE liver
peak_43912	chr18	71451111	71451736	10.8472112065222	6.76637166311142	1.52295151118645	4.4429330897345	8.87407688620862e-06	0.00037357813096064	0	107	FFPE-ATAC in FFPE liver
peak_45471	chr19	23719608	23719822	10.8472112065222	6.76637166311142	1.52295151118645	4.4429330897345	8.87407688620862e-06	0.00037357813096064	0	36	FFPE-ATAC in FFPE liver
peak_47129	chr19	55548524	55548919	10.8472112065222	6.76637166311142	1.52295151118645	4.4429330897345	8.87407688620862e-06	0.00037357813096064	1	66.5	FFPE-ATAC in FFPE liver
peak_55243	chr3	32163694	32164275	10.8472112065222	6.76637166311142	1.52295151118645	4.4429330897345	8.87407688620862e-06	0.00037357813096064	1	98.5	FFPE-ATAC in FFPE liver
peak_67430	chr5	63468880	63469261	10.8472112065222	6.76637166311142	1.52295151118645	4.4429330897345	8.87407688620862e-06	0.00037357813096064	0	64.5	FFPE-ATAC in FFPE liver
peak_72026	chr6	8823692	8824639	10.8472112065222	6.76637166311142	1.52295151118645	4.4429330897345	8.87407688620862e-06	0.00037357813096064	1	162	FFPE-ATAC in FFPE liver
peak_76303	chr6	125682267	125682959	10.8472112065222	6.76637166311142	1.52295151118645	4.4429330897345	8.87407688620862e-06	0.00037357813096064	0	118.5	FFPE-ATAC in FFPE liver
peak_80273	chr7	87367229	87367574	10.8472112065222	6.76637166311142	1.52295151118645	4.4429330897345	8.87407688620862e-06	0.00037357813096064	0	58.5	FFPE-ATAC in FFPE liver
peak_84911	chr8	51538837	51539058	10.8472112065222	6.76637166311142	1.52295151118645	4.4429330897345	8.87407688620862e-06	0.00037357813096064	0	37.5	FFPE-ATAC in FFPE liver
peak_93515	chrUn_random	3640410	3640795	10.8472112065222	6.76637166311142	1.52295151118645	4.4429330897345	8.87407688620862e-06	0.00037357813096064	0	64.5	FFPE-ATAC in FFPE liver
peak_94521	chrX	66770633	66770851	10.8472112065222	6.76637166311142	1.52295151118645	4.4429330897345	8.87407688620862e-06	0.00037357813096064	0.5	37	FFPE-ATAC in FFPE liver
peak_10970	chr10	116495380	116495781	10.8479459785009	6.76643931821328	1.52310467990683	4.44253071208946	8.89069381104195e-06	0.00037357813096064	0	69	FFPE-ATAC in FFPE liver
peak_55585	chr3	43826936	43827289	10.8479459785009	6.76643931821328	1.52310467990683	4.44253071208946	8.89069381104195e-06	0.00037357813096064	0	61	FFPE-ATAC in FFPE liver
peak_93659	chrUn_random	5588732	5588953	10.8479459785009	6.76643931821328	1.52310467990683	4.44253071208946	8.89069381104195e-06	0.00037357813096064	0	38	FFPE-ATAC in FFPE liver
peak_18209	chr12	18140392	18141000	10.8464764345435	6.76630401031042	1.52308479052996	4.44249988732149	8.89196800189816e-06	0.00037357813096064	1	103	FFPE-ATAC in FFPE liver
peak_24912	chr13	94679093	94679316	10.8464764345435	6.76630401031042	1.52308479052996	4.44249988732149	8.89196800189816e-06	0.00037357813096064	0	38.5	FFPE-ATAC in FFPE liver
peak_47199	chr19	56384788	56385191	10.8464764345435	6.76630401031042	1.52308479052996	4.44249988732149	8.89196800189816e-06	0.00037357813096064	0	69.5	FFPE-ATAC in FFPE liver
peak_5520	chr1	180692624	180693017	10.8486807504796	6.76650725411548	1.52354552454767	4.44128983682612	8.94212547185731e-06	0.00037357813096064	0	67	FFPE-ATAC in FFPE liver
peak_34199	chr16	9258304	9258885	10.8486807504796	6.76650725411548	1.52354552454767	4.44128983682612	8.94212547185731e-06	0.00037357813096064	0	97.5	FFPE-ATAC in FFPE liver
peak_40885	chr17	80802926	80803508	10.8486807504796	6.76650725411548	1.52354552454767	4.44128983682612	8.94212547185731e-06	0.00037357813096064	1	100.5	FFPE-ATAC in FFPE liver
peak_47508	chr1_random	1139194	1139394	10.8486807504796	6.76650725411548	1.52354552454767	4.44128983682612	8.94212547185731e-06	0.00037357813096064	0	34	FFPE-ATAC in FFPE liver
peak_56446	chr3	79802997	79803472	10.8486807504796	6.76650725411548	1.52354552454767	4.44128983682612	8.94212547185731e-06	0.00037357813096064	0	81.5	FFPE-ATAC in FFPE liver
peak_71209	chr5	142922970	142923176	10.8486807504796	6.76650725411548	1.52354552454767	4.44128983682612	8.94212547185731e-06	0.00037357813096064	0	35.5	FFPE-ATAC in FFPE liver
peak_71634	chr5	148770926	148771577	10.8486807504796	6.76650725411548	1.52354552454767	4.44128983682612	8.94212547185731e-06	0.00037357813096064	0	110.5	FFPE-ATAC in FFPE liver
peak_76913	chr6	139531860	139532209	10.8486807504796	6.76650725411548	1.52354552454767	4.44128983682612	8.94212547185731e-06	0.00037357813096064	0	60	FFPE-ATAC in FFPE liver
peak_88484	chr8_random	848963	849183	10.8486807504796	6.76650725411548	1.52354552454767	4.44128983682612	8.94212547185731e-06	0.00037357813096064	0	37	FFPE-ATAC in FFPE liver
peak_22184	chr13	20858990	20859393	10.8457416625648	6.76623608116691	1.52350568910418	4.44122797148558	8.94469708580916e-06	0.00037357813096064	1	69.5	FFPE-ATAC in FFPE liver
peak_93552	chrUn_random	4078127	4078355	10.8457416625648	6.76623608116691	1.52350568910418	4.44122797148558	8.94469708580916e-06	0.00037357813096064	0	38.5	FFPE-ATAC in FFPE liver
peak_3842	chr1	137638518	137639099	10.8494155224582	6.76657574537536	1.52427768691646	4.43920146798436	9.02932641810093e-06	0.00037629502490561	1.5	100	FFPE-ATAC in FFPE liver
peak_30875	chr15	37412464	37412861	10.8494155224582	6.76657574537536	1.52427768691646	4.43920146798436	9.02932641810093e-06	0.00037629502490561	0	68.5	FFPE-ATAC in FFPE liver
peak_36824	chr16	87600361	87601157	10.8494155224582	6.76657574537536	1.52427768691646	4.43920146798436	9.02932641810093e-06	0.00037629502490561	1	138.5	FFPE-ATAC in FFPE liver
peak_78761	chr7	35671801	35672198	10.8494155224582	6.76657574537536	1.52427768691646	4.43920146798436	9.02932641810093e-06	0.00037629502490561	0	68.5	FFPE-ATAC in FFPE liver
peak_75607	chr6	114580189	114580398	10.8450068905861	6.76616760017531	1.52421779545671	4.43910812506157	9.03324291001299e-06	0.000376295062912037	0	35.5	FFPE-ATAC in FFPE liver
peak_93634	chrUn_random	5332810	5333069	26.0324133693139	6.57181918287884	1.48170587574123	4.43530614980605	9.19415329691501e-06	0.00038183946419193	1	105	FFPE-ATAC in FFPE liver
peak_83622	chr8	14306635	14307453	16.5876461250337	4.88858244001942	1.10258747341173	4.43373660403804	9.26137643182313e-06	0.000383801982686962	7.5	205	FFPE-ATAC in FFPE liver
peak_88450	chr8_random	396413	397077	16.5876461250337	4.88858244001942	1.10258747341173	4.43373660403804	9.26137643182313e-06	0.000383801982686962	6	166.5	FFPE-ATAC in FFPE liver
peak_75603	chr6	114508758	114508987	10.8508850664156	6.76671543682862	1.52664301862886	4.43241501402605	9.31834362618633e-06	0.000385996318605068	0	39.5	FFPE-ATAC in FFPE liver
peak_3495	chr1	133470347	133470611	10.8435373466287	6.76602793125268	1.52654249970651	4.43225650943455	9.32519841397129e-06	0.000386113837992016	0	45.5	FFPE-ATAC in FFPE liver
peak_95861	chrX	166511927	166512153	10.8516198383943	6.76678711593609	1.52829193407601	4.42767966319682	9.52522234303943e-06	0.000393378993386668	0	39	FFPE-ATAC in FFPE liver
peak_37493	chr17	3008777	3008990	10.84280257465	6.76595623696195	1.52818328472442	4.42745075449642	9.53533330687667e-06	0.000393458394786373	0	36	FFPE-ATAC in FFPE liver
peak_2661	chr1	95186237	95186612	10.621595025709	6.73603237716806	1.52336995603783	4.42179678709693	9.7883495494075e-06	0.000396869503506942	1	62.5	FFPE-ATAC in FFPE liver
peak_12957	chr11	45516612	45516837	10.621595025709	6.73603237716806	1.52336995603783	4.42179678709693	9.7883495494075e-06	0.000396869503506942	0	38	FFPE-ATAC in FFPE liver
peak_23339	chr13	46261926	46262571	10.621595025709	6.73603237716806	1.52336995603783	4.42179678709693	9.7883495494075e-06	0.000396869503506942	1	106.5	FFPE-ATAC in FFPE liver
peak_24267	chr13	65690528	65690909	10.621595025709	6.73603237716806	1.52336995603783	4.42179678709693	9.7883495494075e-06	0.000396869503506942	0	64	FFPE-ATAC in FFPE liver
peak_26939	chr14	29642519	29642906	10.621595025709	6.73603237716806	1.52336995603783	4.42179678709693	9.7883495494075e-06	0.000396869503506942	0	65.5	FFPE-ATAC in FFPE liver
peak_33474	chr15	98271775	98272595	10.621595025709	6.73603237716806	1.52336995603783	4.42179678709693	9.7883495494075e-06	0.000396869503506942	1	139	FFPE-ATAC in FFPE liver
peak_34137	chr16	7898916	7899276	10.621595025709	6.73603237716806	1.52336995603783	4.42179678709693	9.7883495494075e-06	0.000396869503506942	0	61	FFPE-ATAC in FFPE liver
peak_37496	chr17	3029804	3030111	10.621595025709	6.73603237716806	1.52336995603783	4.42179678709693	9.7883495494075e-06	0.000396869503506942	0	52	FFPE-ATAC in FFPE liver
peak_47073	chr19	54554272	54554909	10.621595025709	6.73603237716806	1.52336995603783	4.42179678709693	9.7883495494075e-06	0.000396869503506942	0	104.5	FFPE-ATAC in FFPE liver
peak_61418	chr4	60755591	60756195	10.621595025709	6.73603237716806	1.52336995603783	4.42179678709693	9.7883495494075e-06	0.000396869503506942	0	101.5	FFPE-ATAC in FFPE liver
peak_66233	chr5	21412338	21412917	10.621595025709	6.73603237716806	1.52336995603783	4.42179678709693	9.7883495494075e-06	0.000396869503506942	1	96.5	FFPE-ATAC in FFPE liver
peak_74176	chr6	81631351	81631728	10.621595025709	6.73603237716806	1.52336995603783	4.42179678709693	9.7883495494075e-06	0.000396869503506942	0	63	FFPE-ATAC in FFPE liver
peak_78262	chr7	26619162	26619482	10.621595025709	6.73603237716806	1.52336995603783	4.42179678709693	9.7883495494075e-06	0.000396869503506942	0	53	FFPE-ATAC in FFPE liver
peak_86693	chr8	106858962	106859331	10.621595025709	6.73603237716806	1.52336995603783	4.42179678709693	9.7883495494075e-06	0.000396869503506942	0	61.5	FFPE-ATAC in FFPE liver
peak_22300	chr13	23702599	23703348	10.6208602537303	6.73596374412408	1.52335949732771	4.42178209145009	9.78901546278598e-06	0.000396869503506942	0	125	FFPE-ATAC in FFPE liver
peak_30117	chr15	7164321	7164676	10.6208602537303	6.73596374412408	1.52335949732771	4.42178209145009	9.78901546278598e-06	0.000396869503506942	1	59	FFPE-ATAC in FFPE liver
peak_36656	chr16	79864051	79864544	10.6208602537303	6.73596374412408	1.52335949732771	4.42178209145009	9.78901546278598e-06	0.000396869503506942	0	83.5	FFPE-ATAC in FFPE liver
peak_47001	chr19	53423239	53423977	10.6208602537303	6.73596374412408	1.52335949732771	4.42178209145009	9.78901546278598e-06	0.000396869503506942	1	123.5	FFPE-ATAC in FFPE liver
peak_54294	chr2	173595255	173596019	10.6208602537303	6.73596374412408	1.52335949732771	4.42178209145009	9.78901546278598e-06	0.000396869503506942	2	128.5	FFPE-ATAC in FFPE liver
peak_58435	chr3	125883630	125884025	10.6208602537303	6.73596374412408	1.52335949732771	4.42178209145009	9.78901546278598e-06	0.000396869503506942	0	66	FFPE-ATAC in FFPE liver
peak_61386	chr4	60445982	60446184	10.6208602537303	6.73596374412408	1.52335949732771	4.42178209145009	9.78901546278598e-06	0.000396869503506942	0	33.5	FFPE-ATAC in FFPE liver
peak_72740	chr6	34508942	34509376	10.6208602537303	6.73596374412408	1.52335949732771	4.42178209145009	9.78901546278598e-06	0.000396869503506942	0	72.5	FFPE-ATAC in FFPE liver
peak_89078	chr9	25390107	25390345	10.6208602537303	6.73596374412408	1.52335949732771	4.42178209145009	9.78901546278598e-06	0.000396869503506942	0	40	FFPE-ATAC in FFPE liver
peak_62110	chr4	88451247	88452268	15.3200187707409	3.71601724587318	0.840487143162064	4.4212660194811	9.81242802853814e-06	0.000396869503506942	21	230.5	FFPE-ATAC in FFPE liver
peak_23042	chr13	40793898	40794423	10.6223297976877	6.73610116075326	1.52367587929003	4.42095412305931	9.8266037113929e-06	0.000396869503506942	0	87.5	FFPE-ATAC in FFPE liver
peak_24261	chr13	65631445	65632056	10.6223297976877	6.73610116075326	1.52367587929003	4.42095412305931	9.8266037113929e-06	0.000396869503506942	0	102	FFPE-ATAC in FFPE liver
peak_34130	chr16	7376212	7376565	10.6223297976877	6.73610116075326	1.52367587929003	4.42095412305931	9.8266037113929e-06	0.000396869503506942	0.5	60	FFPE-ATAC in FFPE liver
peak_36013	chr16	45909982	45910663	10.6223297976877	6.73610116075326	1.52367587929003	4.42095412305931	9.8266037113929e-06	0.000396869503506942	0	113.5	FFPE-ATAC in FFPE liver
peak_41245	chr17	86998218	86998426	10.6223297976877	6.73610116075326	1.52367587929003	4.42095412305931	9.8266037113929e-06	0.000396869503506942	0	34.5	FFPE-ATAC in FFPE liver
peak_41930	chr18	13454931	13455502	10.6223297976877	6.73610116075326	1.52367587929003	4.42095412305931	9.8266037113929e-06	0.000396869503506942	1	94.5	FFPE-ATAC in FFPE liver
peak_45549	chr19	25711055	25711506	10.6223297976877	6.73610116075326	1.52367587929003	4.42095412305931	9.8266037113929e-06	0.000396869503506942	0	75.5	FFPE-ATAC in FFPE liver
peak_55389	chr3	37380296	37380718	10.6223297976877	6.73610116075326	1.52367587929003	4.42095412305931	9.8266037113929e-06	0.000396869503506942	2	72	FFPE-ATAC in FFPE liver
peak_61159	chr4	56703561	56704329	10.6223297976877	6.73610116075326	1.52367587929003	4.42095412305931	9.8266037113929e-06	0.000396869503506942	0	128	FFPE-ATAC in FFPE liver
peak_75012	chr6	94846762	94847475	10.6223297976877	6.73610116075326	1.52367587929003	4.42095412305931	9.8266037113929e-06	0.000396869503506942	1	119	FFPE-ATAC in FFPE liver
peak_77669	chr7	6386001	6386674	10.6223297976877	6.73610116075326	1.52367587929003	4.42095412305931	9.8266037113929e-06	0.000396869503506942	1	111	FFPE-ATAC in FFPE liver
peak_85294	chr8	72001749	72002063	10.6223297976877	6.73610116075326	1.52367587929003	4.42095412305931	9.8266037113929e-06	0.000396869503506942	0	52.5	FFPE-ATAC in FFPE liver
peak_7396	chr10	26609841	26610275	10.6201254817516	6.73589496609894	1.52364446727167	4.42090993718545	9.82861353922418e-06	0.000396869503506942	1	71	FFPE-ATAC in FFPE liver
peak_21878	chr13	8450215	8450823	10.6201254817516	6.73589496609894	1.52364446727167	4.42090993718545	9.82861353922418e-06	0.000396869503506942	0	101	FFPE-ATAC in FFPE liver
peak_43201	chr18	56088086	56088465	10.6201254817516	6.73589496609894	1.52364446727167	4.42090993718545	9.82861353922418e-06	0.000396869503506942	0	63.5	FFPE-ATAC in FFPE liver
peak_47790	chr2	7761903	7762263	10.6201254817516	6.73589496609894	1.52364446727167	4.42090993718545	9.82861353922418e-06	0.000396869503506942	0	60.5	FFPE-ATAC in FFPE liver
peak_49851	chr2	62310817	62311348	10.6201254817516	6.73589496609894	1.52364446727167	4.42090993718545	9.82861353922418e-06	0.000396869503506942	0	88	FFPE-ATAC in FFPE liver
peak_85291	chr8	71987093	71987537	10.6201254817516	6.73589496609894	1.52364446727167	4.42090993718545	9.82861353922418e-06	0.000396869503506942	0	74	FFPE-ATAC in FFPE liver
peak_93479	chrUn_random	2441037	2441247	10.6201254817516	6.73589496609894	1.52364446727167	4.42090993718545	9.82861353922418e-06	0.000396869503506942	0	35	FFPE-ATAC in FFPE liver
peak_12700	chr11	33370312	33370689	10.6230645696664	6.73617038830596	1.52427992360209	4.41924759619444	9.90451227533963e-06	0.000398928515794086	0	63	FFPE-ATAC in FFPE liver
peak_54071	chr2	169582198	169582641	10.6230645696664	6.73617038830596	1.52427992360209	4.41924759619444	9.90451227533963e-06	0.000398928515794086	0.5	74	FFPE-ATAC in FFPE liver
peak_62152	chr4	90494021	90494538	10.6230645696664	6.73617038830596	1.52427992360209	4.41924759619444	9.90451227533963e-06	0.000398928515794086	1	86.5	FFPE-ATAC in FFPE liver
peak_70156	chr5	124355847	124356063	10.6230645696664	6.73617038830596	1.52427992360209	4.41924759619444	9.90451227533963e-06	0.000398928515794086	0	36	FFPE-ATAC in FFPE liver
peak_81235	chr7	113174871	113175759	10.6230645696664	6.73617038830596	1.52427992360209	4.41924759619444	9.90451227533963e-06	0.000398928515794086	1	148.5	FFPE-ATAC in FFPE liver
peak_88471	chr8_random	749239	749621	10.6230645696664	6.73617038830596	1.52427992360209	4.41924759619444	9.90451227533963e-06	0.000398928515794086	0	64	FFPE-ATAC in FFPE liver
peak_34247	chr16	10682879	10683308	10.6237993416451	6.73624034762968	1.52518740351492	4.41666403230545	1.00235841578324e-05	0.000402880169274784	1	71.5	FFPE-ATAC in FFPE liver
peak_35658	chr16	35942590	35942847	10.6237993416451	6.73624034762968	1.52518740351492	4.41666403230545	1.00235841578324e-05	0.000402880169274784	0	42.5	FFPE-ATAC in FFPE liver
peak_44317	chr18	82773798	82774177	10.6237993416451	6.73624034762968	1.52518740351492	4.41666403230545	1.00235841578324e-05	0.000402880169274784	0	63.5	FFPE-ATAC in FFPE liver
peak_52437	chr2	137330112	137330501	10.6237993416451	6.73624034762968	1.52518740351492	4.41666403230545	1.00235841578324e-05	0.000402880169274784	1	65	FFPE-ATAC in FFPE liver
peak_1938	chr1	75510277	75510495	10.6186559377942	6.73575580456002	1.52511370365276	4.41655975448087	1.00284187286238e-05	0.000402905976863798	0	36	FFPE-ATAC in FFPE liver
peak_91167	chr9	70470655	70471521	15.8185284657726	3.41645168740938	0.773591002336805	4.41635396105852	1.00379663421647e-05	0.000403121036947226	24.5	197.5	FFPE-ATAC in FFPE liver
peak_88377	chr8	129972213	129972680	15.8166564773566	3.41726861029649	0.774213422998187	4.41385864515616	1.01544274646457e-05	0.000407117558701454	14.5	106	FFPE-ATAC in FFPE liver
peak_88036	chr8	126147488	126147830	16.3598256282844	4.86799994120406	1.10331548063926	4.41215593058074	1.02346358898905e-05	0.000409820407620942	3	84.5	FFPE-ATAC in FFPE liver
peak_53207	chr2	156686726	156687053	16.358356084327	4.86790401833863	1.1040679669751	4.40906190918264	1.03819346214212e-05	0.000415372473350467	3.5	80.5	FFPE-ATAC in FFPE liver
peak_54049	chr2	169219336	169219578	10.6252688856024	6.73638351792712	1.52794075523	4.40879889803914	1.0394548866404e-05	0.000415531171031265	0	41	FFPE-ATAC in FFPE liver
peak_2352	chr1	89962967	89963178	10.6171863938368	6.73561267041952	1.52781893887956	4.40864588009307	1.04018944745357e-05	0.00041565191800076	0	35	FFPE-ATAC in FFPE liver
peak_83744	chr8	19756671	19757005	25.3567020433116	6.53300270768787	1.48244905410022	4.40689863143601	1.04861231793054e-05	0.000418669468125304	1	132	FFPE-ATAC in FFPE liver
peak_62103	chr4	88433716	88434691	17.2627039131103	3.01842498012975	0.685002124563791	4.40644615818072	1.05080412609695e-05	0.000419370341055519	38	233.5	FFPE-ATAC in FFPE liver
peak_8015	chr10	45115335	45116098	10.3952440729171	6.70497121299982	1.5236024355908	4.40073542570826	1.07884604422097e-05	0.000424412040470815	2	124	FFPE-ATAC in FFPE liver
peak_8947	chr10	73694355	73694762	10.3952440729171	6.70497121299982	1.5236024355908	4.40073542570826	1.07884604422097e-05	0.000424412040470815	1	67	FFPE-ATAC in FFPE liver
peak_20091	chr12	83264515	83265276	10.3952440729171	6.70497121299982	1.5236024355908	4.40073542570826	1.07884604422097e-05	0.000424412040470815	2	123.5	FFPE-ATAC in FFPE liver
peak_22535	chr13	30306354	30306774	10.3952440729171	6.70497121299982	1.5236024355908	4.40073542570826	1.07884604422097e-05	0.000424412040470815	0	69	FFPE-ATAC in FFPE liver
peak_25127	chr13	98348236	98348643	10.3952440729171	6.70497121299982	1.5236024355908	4.40073542570826	1.07884604422097e-05	0.000424412040470815	0	66.5	FFPE-ATAC in FFPE liver
peak_26540	chr14	21588855	21589353	10.3952440729171	6.70497121299982	1.5236024355908	4.40073542570826	1.07884604422097e-05	0.000424412040470815	1	82	FFPE-ATAC in FFPE liver
peak_33422	chr15	97396669	97397544	10.3952440729171	6.70497121299982	1.5236024355908	4.40073542570826	1.07884604422097e-05	0.000424412040470815	0	141.5	FFPE-ATAC in FFPE liver
peak_40564	chr17	73044320	73044528	10.3952440729171	6.70497121299982	1.5236024355908	4.40073542570826	1.07884604422097e-05	0.000424412040470815	0	33.5	FFPE-ATAC in FFPE liver
peak_66104	chr5	15209254	15209467	10.3952440729171	6.70497121299982	1.5236024355908	4.40073542570826	1.07884604422097e-05	0.000424412040470815	0	34.5	FFPE-ATAC in FFPE liver
peak_66415	chr5	25124916	25125396	10.3952440729171	6.70497121299982	1.5236024355908	4.40073542570826	1.07884604422097e-05	0.000424412040470815	0	78.5	FFPE-ATAC in FFPE liver
peak_90679	chr9	63323818	63324295	10.3952440729171	6.70497121299982	1.5236024355908	4.40073542570826	1.07884604422097e-05	0.000424412040470815	0.5	78	FFPE-ATAC in FFPE liver
peak_93511	chrUn_random	3580818	3581422	10.3952440729171	6.70497121299982	1.5236024355908	4.40073542570826	1.07884604422097e-05	0.000424412040470815	1	98	FFPE-ATAC in FFPE liver
peak_95918	chrY_random	5826867	5827215	10.3952440729171	6.70497121299982	1.5236024355908	4.40073542570826	1.07884604422097e-05	0.000424412040470815	0	56	FFPE-ATAC in FFPE liver
peak_16952	chr11	113034903	113035309	10.3959788448958	6.70504089211493	1.52376518822828	4.40031111349317	1.08095785546458e-05	0.000424412040470815	0	66	FFPE-ATAC in FFPE liver
peak_19025	chr12	54278716	54279213	10.3959788448958	6.70504089211493	1.52376518822828	4.40031111349317	1.08095785546458e-05	0.000424412040470815	0	80.5	FFPE-ATAC in FFPE liver
peak_24298	chr13	66518510	66519007	10.3959788448958	6.70504089211493	1.52376518822828	4.40031111349317	1.08095785546458e-05	0.000424412040470815	0	81	FFPE-ATAC in FFPE liver
peak_28025	chr14	56559789	56560154	10.3959788448958	6.70504089211493	1.52376518822828	4.40031111349317	1.08095785546458e-05	0.000424412040470815	0	59.5	FFPE-ATAC in FFPE liver
peak_44810	chr19	6329317	6329620	10.3959788448958	6.70504089211493	1.52376518822828	4.40031111349317	1.08095785546458e-05	0.000424412040470815	0	49.5	FFPE-ATAC in FFPE liver
peak_48000	chr2	14121921	14122407	10.3959788448958	6.70504089211493	1.52376518822828	4.40031111349317	1.08095785546458e-05	0.000424412040470815	0	79	FFPE-ATAC in FFPE liver
peak_50468	chr2	78948670	78949177	10.3959788448958	6.70504089211493	1.52376518822828	4.40031111349317	1.08095785546458e-05	0.000424412040470815	0	84	FFPE-ATAC in FFPE liver
peak_52579	chr2	144305497	144305947	10.3959788448958	6.70504089211493	1.52376518822828	4.40031111349317	1.08095785546458e-05	0.000424412040470815	0	74	FFPE-ATAC in FFPE liver
peak_54824	chr3	15237109	15237500	10.3959788448958	6.70504089211493	1.52376518822828	4.40031111349317	1.08095785546458e-05	0.000424412040470815	0.5	64.5	FFPE-ATAC in FFPE liver
peak_61412	chr4	60694419	60695099	10.3959788448958	6.70504089211493	1.52376518822828	4.40031111349317	1.08095785546458e-05	0.000424412040470815	1	110.5	FFPE-ATAC in FFPE liver
peak_64624	chr4	137541089	137541957	10.3959788448958	6.70504089211493	1.52376518822828	4.40031111349317	1.08095785546458e-05	0.000424412040470815	2	143.5	FFPE-ATAC in FFPE liver
peak_67414	chr5	61893919	61894630	10.3959788448958	6.70504089211493	1.52376518822828	4.40031111349317	1.08095785546458e-05	0.000424412040470815	0	115	FFPE-ATAC in FFPE liver
peak_69341	chr5	114158907	114159353	10.3959788448958	6.70504089211493	1.52376518822828	4.40031111349317	1.08095785546458e-05	0.000424412040470815	1	73	FFPE-ATAC in FFPE liver
peak_91448	chr9	75680783	75681188	10.3959788448958	6.70504089211493	1.52376518822828	4.40031111349317	1.08095785546458e-05	0.000424412040470815	1	65.5	FFPE-ATAC in FFPE liver
peak_752	chr1	39279471	39280026	10.3945093009384	6.70490153711887	1.52374354011501	4.40028217387079	1.08110203229127e-05	0.000424412040470815	1	90	FFPE-ATAC in FFPE liver
peak_2434	chr1	91102853	91103190	10.3945093009384	6.70490153711887	1.52374354011501	4.40028217387079	1.08110203229127e-05	0.000424412040470815	0	54.5	FFPE-ATAC in FFPE liver
peak_2579	chr1	93615437	93615867	10.3945093009384	6.70490153711887	1.52374354011501	4.40028217387079	1.08110203229127e-05	0.000424412040470815	0	70	FFPE-ATAC in FFPE liver
peak_10865	chr10	113140382	113140738	10.3945093009384	6.70490153711887	1.52374354011501	4.40028217387079	1.08110203229127e-05	0.000424412040470815	0	57.5	FFPE-ATAC in FFPE liver
peak_18557	chr12	31104335	31105146	10.3945093009384	6.70490153711887	1.52374354011501	4.40028217387079	1.08110203229127e-05	0.000424412040470815	0	132.5	FFPE-ATAC in FFPE liver
peak_37382	chr16	96335582	96335985	10.3945093009384	6.70490153711887	1.52374354011501	4.40028217387079	1.08110203229127e-05	0.000424412040470815	0	65	FFPE-ATAC in FFPE liver
peak_61398	chr4	60534163	60534853	10.3945093009384	6.70490153711887	1.52374354011501	4.40028217387079	1.08110203229127e-05	0.000424412040470815	0	111	FFPE-ATAC in FFPE liver
peak_66428	chr5	27744394	27744893	10.3945093009384	6.70490153711887	1.52374354011501	4.40028217387079	1.08110203229127e-05	0.000424412040470815	1	82	FFPE-ATAC in FFPE liver
peak_95986	chrY_random	22861997	22862338	10.3945093009384	6.70490153711887	1.52374354011501	4.40028217387079	1.08110203229127e-05	0.000424412040470815	0	56	FFPE-ATAC in FFPE liver
peak_18001	chr12	12377309	12378066	10.3967136168745	6.70511088760638	1.52423327080509	4.39900572703336	1.08747957088694e-05	0.000425059371190011	1	122.5	FFPE-ATAC in FFPE liver
peak_18964	chr12	53065966	53066318	10.3967136168745	6.70511088760638	1.52423327080509	4.39900572703336	1.08747957088694e-05	0.000425059371190011	0	57.5	FFPE-ATAC in FFPE liver
peak_29279	chr14	99866936	99867601	10.3967136168745	6.70511088760638	1.52423327080509	4.39900572703336	1.08747957088694e-05	0.000425059371190011	0	108	FFPE-ATAC in FFPE liver
peak_41415	chr17	89148313	89149104	10.3967136168745	6.70511088760638	1.52423327080509	4.39900572703336	1.08747957088694e-05	0.000425059371190011	0	129	FFPE-ATAC in FFPE liver
peak_66076	chr5	15004650	15005033	10.3967136168745	6.70511088760638	1.52423327080509	4.39900572703336	1.08747957088694e-05	0.000425059371190011	0	62.5	FFPE-ATAC in FFPE liver
peak_77199	chr6	143968171	143968587	10.3967136168745	6.70511088760638	1.52423327080509	4.39900572703336	1.08747957088694e-05	0.000425059371190011	1	68	FFPE-ATAC in FFPE liver
peak_82431	chr7	137994668	137995167	10.3967136168745	6.70511088760638	1.52423327080509	4.39900572703336	1.08747957088694e-05	0.000425059371190011	1	81.5	FFPE-ATAC in FFPE liver
peak_84920	chr8	54534187	54534460	10.3967136168745	6.70511088760638	1.52423327080509	4.39900572703336	1.08747957088694e-05	0.000425059371190011	0	44	FFPE-ATAC in FFPE liver
peak_27217	chr14	34753030	34753428	10.3937745289597	6.70483155118994	1.52418988950812	4.39894766219298	1.08777053398801e-05	0.000425059371190011	1	64.5	FFPE-ATAC in FFPE liver
peak_69765	chr5	119961530	119961752	10.3937745289597	6.70483155118994	1.52418988950812	4.39894766219298	1.08777053398801e-05	0.000425059371190011	0	36.5	FFPE-ATAC in FFPE liver
peak_9412	chr10	79824494	79825632	10.3974483888532	6.70518150839961	1.52501103465297	4.39680851878256	1.09854174828979e-05	0.000426898309816158	3	183.5	FFPE-ATAC in FFPE liver
peak_18239	chr12	20288128	20288445	10.3974483888532	6.70518150839961	1.52501103465297	4.39680851878256	1.09854174828979e-05	0.000426898309816158	0	52.5	FFPE-ATAC in FFPE liver
peak_24257	chr13	65551549	65552211	10.3974483888532	6.70518150839961	1.52501103465297	4.39680851878256	1.09854174828979e-05	0.000426898309816158	0	108.5	FFPE-ATAC in FFPE liver
peak_37651	chr17	5814071	5814467	10.3974483888532	6.70518150839961	1.52501103465297	4.39680851878256	1.09854174828979e-05	0.000426898309816158	0	64.5	FFPE-ATAC in FFPE liver
peak_47496	chr1_random	867756	867956	10.3974483888532	6.70518150839961	1.52501103465297	4.39680851878256	1.09854174828979e-05	0.000426898309816158	0	33	FFPE-ATAC in FFPE liver
peak_84509	chr8	40238164	40238755	10.3974483888532	6.70518150839961	1.52501103465297	4.39680851878256	1.09854174828979e-05	0.000426898309816158	0	96	FFPE-ATAC in FFPE liver
peak_81726	chr7	124514626	124514997	10.393039756981	6.70476094522901	1.52494575440657	4.39672094948593	1.09898484785455e-05	0.000426898309816158	0	60.5	FFPE-ATAC in FFPE liver
peak_81868	chr7	127189253	127189872	10.393039756981	6.70476094522901	1.52494575440657	4.39672094948593	1.09898484785455e-05	0.000426898309816158	1	100.5	FFPE-ATAC in FFPE liver
peak_94686	chrX	73843840	73844585	25.1292138740825	6.5203269007961	1.48312429054189	4.39634556751395	1.1008862102775e-05	0.000427464107394297	6	291.5	FFPE-ATAC in FFPE liver
peak_5728	chr1	184195632	184195883	10.3981831608319	6.7052530577356	1.52610577945176	4.39370137248573	1.11436868238156e-05	0.000431478884424787	0	42	FFPE-ATAC in FFPE liver
peak_24309	chr13	66740539	66741072	10.3981831608319	6.7052530577356	1.52610577945176	4.39370137248573	1.11436868238156e-05	0.000431478884424787	0	86.5	FFPE-ATAC in FFPE liver
peak_37968	chr17	13555434	13555636	10.3981831608319	6.7052530577356	1.52610577945176	4.39370137248573	1.11436868238156e-05	0.000431478884424787	0	33	FFPE-ATAC in FFPE liver
peak_66078	chr5	15021907	15022216	10.3981831608319	6.7052530577356	1.52610577945176	4.39370137248573	1.11436868238156e-05	0.000431478884424787	0	50	FFPE-ATAC in FFPE liver
peak_87122	chr8	113076550	113076931	10.3981831608319	6.7052530577356	1.52610577945176	4.39370137248573	1.11436868238156e-05	0.000431478884424787	0	62.5	FFPE-ATAC in FFPE liver
peak_16667	chr11	107433100	107433313	15.0489972449383	4.13052521339137	0.941152270870575	4.38879588482595	1.13979982966078e-05	0.000439907804136789	3	48	FFPE-ATAC in FFPE liver
peak_59602	chr4	3009481	3009759	24.9021281493119	6.50710477796336	1.48323212989695	4.38711152947816	1.14865897511217e-05	0.000442971207167857	1.5	107	FFPE-ATAC in FFPE liver
peak_78323	chr7	27564958	27565158	16.1286635991617	4.84790590813642	1.10605928768461	4.38304344271171	1.17032764015184e-05	0.000448581777459754	2.5	48.5	FFPE-ATAC in FFPE liver
peak_4129	chr1	146947449	146947750	10.1696278921039	6.67329772833906	1.52386872536749	4.37918149854395	1.19125888278983e-05	0.000448581777459754	0	48.5	FFPE-ATAC in FFPE liver
peak_19303	chr12	70378128	70378477	10.1696278921039	6.67329772833906	1.52386872536749	4.37918149854395	1.19125888278983e-05	0.000448581777459754	0	55.5	FFPE-ATAC in FFPE liver
peak_26085	chr14	4955516	4955909	10.1696278921039	6.67329772833906	1.52386872536749	4.37918149854395	1.19125888278983e-05	0.000448581777459754	0	62.5	FFPE-ATAC in FFPE liver
peak_30315	chr15	12004527	12005364	10.1696278921039	6.67329772833906	1.52386872536749	4.37918149854395	1.19125888278983e-05	0.000448581777459754	0	136.5	FFPE-ATAC in FFPE liver
peak_31074	chr15	42900753	42901229	10.1696278921039	6.67329772833906	1.52386872536749	4.37918149854395	1.19125888278983e-05	0.000448581777459754	1	75.5	FFPE-ATAC in FFPE liver
peak_34713	chr16	21347534	21347986	10.1696278921039	6.67329772833906	1.52386872536749	4.37918149854395	1.19125888278983e-05	0.000448581777459754	0	72.5	FFPE-ATAC in FFPE liver
peak_36419	chr16	69257558	69258191	10.1696278921039	6.67329772833906	1.52386872536749	4.37918149854395	1.19125888278983e-05	0.000448581777459754	0	101.5	FFPE-ATAC in FFPE liver
peak_37970	chr17	13600741	13601469	10.1696278921039	6.67329772833906	1.52386872536749	4.37918149854395	1.19125888278983e-05	0.000448581777459754	0	115.5	FFPE-ATAC in FFPE liver
peak_41278	chr17	87296553	87297096	10.1696278921039	6.67329772833906	1.52386872536749	4.37918149854395	1.19125888278983e-05	0.000448581777459754	1	86.5	FFPE-ATAC in FFPE liver
peak_43066	chr18	52811294	52811855	10.1696278921039	6.67329772833906	1.52386872536749	4.37918149854395	1.19125888278983e-05	0.000448581777459754	0	89.5	FFPE-ATAC in FFPE liver
peak_68105	chr5	83785244	83785622	10.1696278921039	6.67329772833906	1.52386872536749	4.37918149854395	1.19125888278983e-05	0.000448581777459754	0	61.5	FFPE-ATAC in FFPE liver
peak_81234	chr7	113100966	113101663	10.1696278921039	6.67329772833906	1.52386872536749	4.37918149854395	1.19125888278983e-05	0.000448581777459754	0	113	FFPE-ATAC in FFPE liver
peak_81982	chr7	129890980	129891192	10.1696278921039	6.67329772833906	1.52386872536749	4.37918149854395	1.19125888278983e-05	0.000448581777459754	0	33.5	FFPE-ATAC in FFPE liver
peak_94520	chrX	66146517	66146890	10.1696278921039	6.67329772833906	1.52386872536749	4.37918149854395	1.19125888278983e-05	0.000448581777459754	0	59	FFPE-ATAC in FFPE liver
peak_95513	chrX	145513797	145514130	10.1696278921039	6.67329772833906	1.52386872536749	4.37918149854395	1.19125888278983e-05	0.000448581777459754	0	52.5	FFPE-ATAC in FFPE liver
peak_2806	chr1	106728484	106728838	10.1688931201252	6.67322707881841	1.52385772200532	4.37916675714106	1.19133945962068e-05	0.000448581777459754	0	56.5	FFPE-ATAC in FFPE liver
peak_13189	chr11	51350839	51351420	10.1688931201252	6.67322707881841	1.52385772200532	4.37916675714106	1.19133945962068e-05	0.000448581777459754	1	93	FFPE-ATAC in FFPE liver
peak_13287	chr11	52238334	52238991	10.1688931201252	6.67322707881841	1.52385772200532	4.37916675714106	1.19133945962068e-05	0.000448581777459754	0	104.5	FFPE-ATAC in FFPE liver
peak_24178	chr13	64010926	64011280	10.1688931201252	6.67322707881841	1.52385772200532	4.37916675714106	1.19133945962068e-05	0.000448581777459754	0	57	FFPE-ATAC in FFPE liver
peak_27362	chr14	41691798	41692269	10.1688931201252	6.67322707881841	1.52385772200532	4.37916675714106	1.19133945962068e-05	0.000448581777459754	1	75	FFPE-ATAC in FFPE liver
peak_29880	chr14	122172232	122172601	10.1688931201252	6.67322707881841	1.52385772200532	4.37916675714106	1.19133945962068e-05	0.000448581777459754	0	59.5	FFPE-ATAC in FFPE liver
peak_37965	chr17	13423242	13423442	10.1688931201252	6.67322707881841	1.52385772200532	4.37916675714106	1.19133945962068e-05	0.000448581777459754	0	32	FFPE-ATAC in FFPE liver
peak_38135	chr17	17991907	17992264	10.1688931201252	6.67322707881841	1.52385772200532	4.37916675714106	1.19133945962068e-05	0.000448581777459754	0	57.5	FFPE-ATAC in FFPE liver
peak_49335	chr2	43026556	43026786	10.1688931201252	6.67322707881841	1.52385772200532	4.37916675714106	1.19133945962068e-05	0.000448581777459754	0	36	FFPE-ATAC in FFPE liver
peak_50940	chr2	94396761	94398000	10.1688931201252	6.67322707881841	1.52385772200532	4.37916675714106	1.19133945962068e-05	0.000448581777459754	0	197	FFPE-ATAC in FFPE liver
peak_64549	chr4	136975463	136975737	10.1688931201252	6.67322707881841	1.52385772200532	4.37916675714106	1.19133945962068e-05	0.000448581777459754	0	44	FFPE-ATAC in FFPE liver
peak_64777	chr4	139259898	139260122	10.1688931201252	6.67322707881841	1.52385772200532	4.37916675714106	1.19133945962068e-05	0.000448581777459754	0	36	FFPE-ATAC in FFPE liver
peak_68586	chr5	97607427	97607663	10.1688931201252	6.67322707881841	1.52385772200532	4.37916675714106	1.19133945962068e-05	0.000448581777459754	0	37.5	FFPE-ATAC in FFPE liver
peak_68729	chr5	101639006	101639980	10.1688931201252	6.67322707881841	1.52385772200532	4.37916675714106	1.19133945962068e-05	0.000448581777459754	4	153.5	FFPE-ATAC in FFPE liver
peak_95502	chrX	144730367	144730714	10.1688931201252	6.67322707881841	1.52385772200532	4.37916675714106	1.19133945962068e-05	0.000448581777459754	0	55.5	FFPE-ATAC in FFPE liver
peak_95897	chrY	2652089	2652434	10.1688931201252	6.67322707881841	1.52385772200532	4.37916675714106	1.19133945962068e-05	0.000448581777459754	0	54.5	FFPE-ATAC in FFPE liver
peak_4032	chr1	141241733	141242346	10.1703626640826	6.6733685482115	1.5241929291285	4.37829648772035	1.19610560050668e-05	0.000448581777459754	0	99.5	FFPE-ATAC in FFPE liver
peak_18314	chr12	22375075	22375466	10.1703626640826	6.6733685482115	1.5241929291285	4.37829648772035	1.19610560050668e-05	0.000448581777459754	0	63	FFPE-ATAC in FFPE liver
peak_21887	chr13	8720027	8720407	10.1703626640826	6.6733685482115	1.5241929291285	4.37829648772035	1.19610560050668e-05	0.000448581777459754	1	61	FFPE-ATAC in FFPE liver
peak_24259	chr13	65573617	65573973	10.1703626640826	6.6733685482115	1.5241929291285	4.37829648772035	1.19610560050668e-05	0.000448581777459754	0	57.5	FFPE-ATAC in FFPE liver
peak_29198	chr14	90233157	90233526	10.1703626640826	6.6733685482115	1.5241929291285	4.37829648772035	1.19610560050668e-05	0.000448581777459754	0	59	FFPE-ATAC in FFPE liver
peak_33193	chr15	91737158	91739511	10.1703626640826	6.6733685482115	1.5241929291285	4.37829648772035	1.19610560050668e-05	0.000448581777459754	0	370	FFPE-ATAC in FFPE liver
peak_39888	chr17	50312873	50313304	10.1703626640826	6.6733685482115	1.5241929291285	4.37829648772035	1.19610560050668e-05	0.000448581777459754	1.5	68	FFPE-ATAC in FFPE liver
peak_41497	chr18	4152379	4152770	10.1703626640826	6.6733685482115	1.5241929291285	4.37829648772035	1.19610560050668e-05	0.000448581777459754	1	61.5	FFPE-ATAC in FFPE liver
peak_52060	chr2	128781742	128782107	10.1703626640826	6.6733685482115	1.5241929291285	4.37829648772035	1.19610560050668e-05	0.000448581777459754	0	59	FFPE-ATAC in FFPE liver
peak_66062	chr5	14921503	14921719	10.1703626640826	6.6733685482115	1.5241929291285	4.37829648772035	1.19610560050668e-05	0.000448581777459754	0	34	FFPE-ATAC in FFPE liver
peak_66937	chr5	37699985	37700334	10.1703626640826	6.6733685482115	1.5241929291285	4.37829648772035	1.19610560050668e-05	0.000448581777459754	0	56	FFPE-ATAC in FFPE liver
peak_67432	chr5	63803981	63804758	10.1703626640826	6.6733685482115	1.5241929291285	4.37829648772035	1.19610560050668e-05	0.000448581777459754	0	123	FFPE-ATAC in FFPE liver
peak_79261	chr7	53703751	53704210	10.1703626640826	6.6733685482115	1.5241929291285	4.37829648772035	1.19610560050668e-05	0.000448581777459754	0	72.5	FFPE-ATAC in FFPE liver
peak_82495	chr7	139598642	139599063	10.1703626640826	6.6733685482115	1.5241929291285	4.37829648772035	1.19610560050668e-05	0.000448581777459754	0	67	FFPE-ATAC in FFPE liver
peak_82961	chr7	148953606	148954321	10.1703626640826	6.6733685482115	1.5241929291285	4.37829648772035	1.19610560050668e-05	0.000448581777459754	2	115.5	FFPE-ATAC in FFPE liver
peak_87294	chr8	116981001	116981336	10.1703626640826	6.6733685482115	1.5241929291285	4.37829648772035	1.19610560050668e-05	0.000448581777459754	0	53.5	FFPE-ATAC in FFPE liver
peak_88610	chr9	11605180	11605609	10.1703626640826	6.6733685482115	1.5241929291285	4.37829648772035	1.19610560050668e-05	0.000448581777459754	1	70	FFPE-ATAC in FFPE liver
peak_89755	chr9	45518634	45519528	10.1703626640826	6.6733685482115	1.5241929291285	4.37829648772035	1.19610560050668e-05	0.000448581777459754	0	143.5	FFPE-ATAC in FFPE liver
peak_7078	chr10	20319088	20319292	10.1681583481465	6.67315626614697	1.52415987004356	4.37825217505318	1.19634877071169e-05	0.000448581777459754	0	32.5	FFPE-ATAC in FFPE liver
peak_21838	chr13	5765245	5765713	10.1681583481465	6.67315626614697	1.52415987004356	4.37825217505318	1.19634877071169e-05	0.000448581777459754	0	75	FFPE-ATAC in FFPE liver
peak_25985	chr13	117967546	117967959	10.1681583481465	6.67315626614697	1.52415987004356	4.37825217505318	1.19634877071169e-05	0.000448581777459754	1	65	FFPE-ATAC in FFPE liver
peak_37748	chr17	8322140	8322362	10.1681583481465	6.67315626614697	1.52415987004356	4.37825217505318	1.19634877071169e-05	0.000448581777459754	0	35.5	FFPE-ATAC in FFPE liver
peak_49637	chr2	57075416	57075785	10.1681583481465	6.67315626614697	1.52415987004356	4.37825217505318	1.19634877071169e-05	0.000448581777459754	0	59.5	FFPE-ATAC in FFPE liver
peak_54774	chr3	11724290	11724641	10.1681583481465	6.67315626614697	1.52415987004356	4.37825217505318	1.19634877071169e-05	0.000448581777459754	0	56	FFPE-ATAC in FFPE liver
peak_56303	chr3	71558397	71558878	10.1681583481465	6.67315626614697	1.52415987004356	4.37825217505318	1.19634877071169e-05	0.000448581777459754	0	77	FFPE-ATAC in FFPE liver
peak_62002	chr4	85478470	85478985	10.1681583481465	6.67315626614697	1.52415987004356	4.37825217505318	1.19634877071169e-05	0.000448581777459754	0	81.5	FFPE-ATAC in FFPE liver
peak_66240	chr5	21889970	21890355	10.1681583481465	6.67315626614697	1.52415987004356	4.37825217505318	1.19634877071169e-05	0.000448581777459754	0	60.5	FFPE-ATAC in FFPE liver
peak_66307	chr5	23539171	23539385	10.1681583481465	6.67315626614697	1.52415987004356	4.37825217505318	1.19634877071169e-05	0.000448581777459754	0	33.5	FFPE-ATAC in FFPE liver
peak_41948	chr18	14338831	14339122	10.1710974360613	6.67343986972864	1.52483351703638	4.37650392332597	1.20598021707452e-05	0.000450064162018133	0	46.5	FFPE-ATAC in FFPE liver
peak_47457	chr19	61340191	61340527	10.1710974360613	6.67343986972864	1.52483351703638	4.37650392332597	1.20598021707452e-05	0.000450064162018133	0	53.5	FFPE-ATAC in FFPE liver
peak_49962	chr2	66765344	66765622	10.1710974360613	6.67343986972864	1.52483351703638	4.37650392332597	1.20598021707452e-05	0.000450064162018133	0	45	FFPE-ATAC in FFPE liver
peak_50835	chr2	92500899	92501434	10.1710974360613	6.67343986972864	1.52483351703638	4.37650392332597	1.20598021707452e-05	0.000450064162018133	0	86	FFPE-ATAC in FFPE liver
peak_63376	chr4	119892900	119893311	10.1710974360613	6.67343986972864	1.52483351703638	4.37650392332597	1.20598021707452e-05	0.000450064162018133	1	66.5	FFPE-ATAC in FFPE liver
peak_66091	chr5	15149527	15149844	10.1710974360613	6.67343986972864	1.52483351703638	4.37650392332597	1.20598021707452e-05	0.000450064162018133	0	51	FFPE-ATAC in FFPE liver
peak_79517	chr7	67050089	67050407	10.1710974360613	6.67343986972864	1.52483351703638	4.37650392332597	1.20598021707452e-05	0.000450064162018133	0	51.5	FFPE-ATAC in FFPE liver
peak_92820	chr9	112889464	112890197	10.1710974360613	6.67343986972864	1.52483351703638	4.37650392332597	1.20598021707452e-05	0.000450064162018133	0	117	FFPE-ATAC in FFPE liver
peak_3900	chr1	138457411	138457824	10.1674235761678	6.67308495848756	1.52477825775328	4.37642976908666	1.20639037830504e-05	0.000450064162018133	0	66	FFPE-ATAC in FFPE liver
peak_70899	chr5	138324910	138325178	10.1674235761678	6.67308495848756	1.52477825775328	4.37642976908666	1.20639037830504e-05	0.000450064162018133	0	42.5	FFPE-ATAC in FFPE liver
peak_58219	chr3	120952466	120953022	15.5951166008954	3.39390682302508	0.775861383882793	4.37437265667263	1.217821878083e-05	0.000453624488866406	16.5	125.5	FFPE-ATAC in FFPE liver
peak_32558	chr15	81113937	81114141	10.17183220804	6.67351201839687	1.52579685313006	4.37378803390939	1.22108948029719e-05	0.000454137543481116	0	32.5	FFPE-ATAC in FFPE liver
peak_59541	chr3	156139791	156140357	10.17183220804	6.67351201839687	1.52579685313006	4.37378803390939	1.22108948029719e-05	0.000454137543481116	1	90.5	FFPE-ATAC in FFPE liver
peak_66087	chr5	15114933	15115354	10.17183220804	6.67351201839687	1.52579685313006	4.37378803390939	1.22108948029719e-05	0.000454137543481116	0	67	FFPE-ATAC in FFPE liver
peak_67413	chr5	61883667	61883961	10.17183220804	6.67351201839687	1.52579685313006	4.37378803390939	1.22108948029719e-05	0.000454137543481116	0	47.5	FFPE-ATAC in FFPE liver
peak_77116	chr6	142632690	142632917	10.1666888041891	6.67301282955394	1.52571916053551	4.37368357307106	1.22167421832399e-05	0.000454179248469525	0	36.5	FFPE-ATAC in FFPE liver
peak_93605	chrUn_random	5172650	5173100	24.4494262437281	6.48035770266859	1.48382638386408	4.36732880149555	1.25775312396609e-05	0.000466149597837983	2	170.5	FFPE-ATAC in FFPE liver
peak_93655	chrUn_random	5556011	5556348	24.4494262437281	6.48035770266859	1.48382638386408	4.36732880149555	1.25775312396609e-05	0.000466149597837983	1	127.5	FFPE-ATAC in FFPE liver
peak_54588	chr2	181665440	181666298	15.9078584946793	4.82617839983924	1.10510496373001	4.36716742593362	1.25868243214889e-05	0.000466314183093185	9	207.5	FFPE-ATAC in FFPE liver
peak_663	chr1	37081239	37081451	14.8248506080825	4.10757502410115	0.940847093781795	4.36582634016596	1.26643068602422e-05	0.000468642748510974	4.5	46.5	FFPE-ATAC in FFPE liver
peak_84959	chr8	57998010	57998268	15.9107975825941	4.8263748081534	1.10594811298874	4.36401559121113	1.27696470167864e-05	0.000472358975214477	3	62	FFPE-ATAC in FFPE liver
peak_946	chr1	44899852	44900197	9.94327693931198	6.6408409762327	1.52404879362956	4.35736769320711	1.31636022555261e-05	0.000476452089932811	0	53	FFPE-ATAC in FFPE liver
peak_10867	chr10	113353075	113353570	9.94327693931198	6.6408409762327	1.52404879362956	4.35736769320711	1.31636022555261e-05	0.000476452089932811	0	78	FFPE-ATAC in FFPE liver
peak_18874	chr12	43555270	43555631	9.94327693931198	6.6408409762327	1.52404879362956	4.35736769320711	1.31636022555261e-05	0.000476452089932811	1	55.5	FFPE-ATAC in FFPE liver
peak_24275	chr13	65764199	65764795	9.94327693931198	6.6408409762327	1.52404879362956	4.35736769320711	1.31636022555261e-05	0.000476452089932811	0	92.5	FFPE-ATAC in FFPE liver
peak_32457	chr15	79384617	79384975	9.94327693931198	6.6408409762327	1.52404879362956	4.35736769320711	1.31636022555261e-05	0.000476452089932811	0	55	FFPE-ATAC in FFPE liver
peak_37402	chr16	96597481	96598149	9.94327693931198	6.6408409762327	1.52404879362956	4.35736769320711	1.31636022555261e-05	0.000476452089932811	2.5	105.5	FFPE-ATAC in FFPE liver
peak_40544	chr17	72262903	72263481	9.94327693931198	6.6408409762327	1.52404879362956	4.35736769320711	1.31636022555261e-05	0.000476452089932811	1	91	FFPE-ATAC in FFPE liver
peak_41106	chr17	84981785	84982164	9.94327693931198	6.6408409762327	1.52404879362956	4.35736769320711	1.31636022555261e-05	0.000476452089932811	1	59.5	FFPE-ATAC in FFPE liver
peak_53212	chr2	156706563	156707080	9.94327693931198	6.6408409762327	1.52404879362956	4.35736769320711	1.31636022555261e-05	0.000476452089932811	1	80.5	FFPE-ATAC in FFPE liver
peak_61806	chr4	76772437	76772652	9.94327693931198	6.6408409762327	1.52404879362956	4.35736769320711	1.31636022555261e-05	0.000476452089932811	0	34	FFPE-ATAC in FFPE liver
peak_63977	chr4	131192069	131192434	9.94327693931198	6.6408409762327	1.52404879362956	4.35736769320711	1.31636022555261e-05	0.000476452089932811	0	58	FFPE-ATAC in FFPE liver
peak_68559	chr5	97291048	97291433	9.94327693931198	6.6408409762327	1.52404879362956	4.35736769320711	1.31636022555261e-05	0.000476452089932811	0	60	FFPE-ATAC in FFPE liver
peak_72302	chr6	23128195	23129428	9.94327693931198	6.6408409762327	1.52404879362956	4.35736769320711	1.31636022555261e-05	0.000476452089932811	1	193	FFPE-ATAC in FFPE liver
peak_72478	chr6	29200591	29200860	9.94327693931198	6.6408409762327	1.52404879362956	4.35736769320711	1.31636022555261e-05	0.000476452089932811	0	42.5	FFPE-ATAC in FFPE liver
peak_79487	chr7	64983145	64983692	9.94327693931198	6.6408409762327	1.52404879362956	4.35736769320711	1.31636022555261e-05	0.000476452089932811	0	85	FFPE-ATAC in FFPE liver
peak_85486	chr8	73650910	73651229	9.94327693931198	6.6408409762327	1.52404879362956	4.35736769320711	1.31636022555261e-05	0.000476452089932811	0	49.5	FFPE-ATAC in FFPE liver
peak_88213	chr8	128357665	128358079	9.94327693931198	6.6408409762327	1.52404879362956	4.35736769320711	1.31636022555261e-05	0.000476452089932811	0	63.5	FFPE-ATAC in FFPE liver
peak_91646	chr9	83219764	83219990	9.94327693931198	6.6408409762327	1.52404879362956	4.35736769320711	1.31636022555261e-05	0.000476452089932811	0	35.5	FFPE-ATAC in FFPE liver
peak_93475	chrUn_random	2369345	2369567	9.94327693931198	6.6408409762327	1.52404879362956	4.35736769320711	1.31636022555261e-05	0.000476452089932811	0	34.5	FFPE-ATAC in FFPE liver
peak_93658	chrUn_random	5566556	5566756	9.94327693931198	6.6408409762327	1.52404879362956	4.35736769320711	1.31636022555261e-05	0.000476452089932811	0	31.5	FFPE-ATAC in FFPE liver
peak_96055	chrY_random	42427516	42427855	9.94327693931198	6.6408409762327	1.52404879362956	4.35736769320711	1.31636022555261e-05	0.000476452089932811	0	52	FFPE-ATAC in FFPE liver
peak_96092	chrY_random	55346929	55347280	9.94327693931198	6.6408409762327	1.52404879362956	4.35736769320711	1.31636022555261e-05	0.000476452089932811	0	54.5	FFPE-ATAC in FFPE liver
peak_275	chr1	18104579	18104987	9.94401171129067	6.64091270859952	1.52422083215286	4.3569229395846	1.3190368107421e-05	0.000476452089932811	0	64	FFPE-ATAC in FFPE liver
peak_1740	chr1	72599688	72600196	9.94401171129067	6.64091270859952	1.52422083215286	4.3569229395846	1.3190368107421e-05	0.000476452089932811	0	80	FFPE-ATAC in FFPE liver
peak_5282	chr1	174040949	174041312	9.94401171129067	6.64091270859952	1.52422083215286	4.3569229395846	1.3190368107421e-05	0.000476452089932811	1	56.5	FFPE-ATAC in FFPE liver
peak_6682	chr10	9316814	9317288	9.94401171129067	6.64091270859952	1.52422083215286	4.3569229395846	1.3190368107421e-05	0.000476452089932811	0	74.5	FFPE-ATAC in FFPE liver
peak_10596	chr10	104958385	104958857	9.94401171129067	6.64091270859952	1.52422083215286	4.3569229395846	1.3190368107421e-05	0.000476452089932811	0	74	FFPE-ATAC in FFPE liver
peak_11317	chr10	122297429	122297879	9.94401171129067	6.64091270859952	1.52422083215286	4.3569229395846	1.3190368107421e-05	0.000476452089932811	0	70	FFPE-ATAC in FFPE liver
peak_13877	chr11	63298045	63298464	9.94401171129067	6.64091270859952	1.52422083215286	4.3569229395846	1.3190368107421e-05	0.000476452089932811	0	65	FFPE-ATAC in FFPE liver
peak_22259	chr13	23226043	23226705	9.94401171129067	6.64091270859952	1.52422083215286	4.3569229395846	1.3190368107421e-05	0.000476452089932811	1	103	FFPE-ATAC in FFPE liver
peak_23026	chr13	39551520	39551870	9.94401171129067	6.64091270859952	1.52422083215286	4.3569229395846	1.3190368107421e-05	0.000476452089932811	0	54.5	FFPE-ATAC in FFPE liver
peak_36287	chr16	58180691	58181549	9.94401171129067	6.64091270859952	1.52422083215286	4.3569229395846	1.3190368107421e-05	0.000476452089932811	3	133	FFPE-ATAC in FFPE liver
peak_39950	chr17	53291708	53292092	9.94401171129067	6.64091270859952	1.52422083215286	4.3569229395846	1.3190368107421e-05	0.000476452089932811	0	59	FFPE-ATAC in FFPE liver
peak_54835	chr3	17753431	17753849	9.94401171129067	6.64091270859952	1.52422083215286	4.3569229395846	1.3190368107421e-05	0.000476452089932811	0	65.5	FFPE-ATAC in FFPE liver
peak_60861	chr4	47917819	47918490	9.94401171129067	6.64091270859952	1.52422083215286	4.3569229395846	1.3190368107421e-05	0.000476452089932811	0	104	FFPE-ATAC in FFPE liver
peak_66067	chr5	14953195	14953410	9.94401171129067	6.64091270859952	1.52422083215286	4.3569229395846	1.3190368107421e-05	0.000476452089932811	0	33.5	FFPE-ATAC in FFPE liver
peak_75073	chr6	96960156	96960993	9.94401171129067	6.64091270859952	1.52422083215286	4.3569229395846	1.3190368107421e-05	0.000476452089932811	0	132	FFPE-ATAC in FFPE liver
peak_83304	chr8	8542057	8542476	9.94401171129067	6.64091270859952	1.52422083215286	4.3569229395846	1.3190368107421e-05	0.000476452089932811	1	65	FFPE-ATAC in FFPE liver
peak_83497	chr8	11850466	11851016	9.94401171129067	6.64091270859952	1.52422083215286	4.3569229395846	1.3190368107421e-05	0.000476452089932811	0	85	FFPE-ATAC in FFPE liver
peak_85288	chr8	71948588	71948888	9.94401171129067	6.64091270859952	1.52422083215286	4.3569229395846	1.3190368107421e-05	0.000476452089932811	0	46	FFPE-ATAC in FFPE liver
peak_88234	chr8	128829901	128830120	9.94401171129067	6.64091270859952	1.52422083215286	4.3569229395846	1.3190368107421e-05	0.000476452089932811	0	34	FFPE-ATAC in FFPE liver
peak_92692	chr9	110180849	110181124	9.94401171129067	6.64091270859952	1.52422083215286	4.3569229395846	1.3190368107421e-05	0.000476452089932811	0	43.5	FFPE-ATAC in FFPE liver
peak_96032	chrY_random	36066216	36066566	9.94401171129067	6.64091270859952	1.52422083215286	4.3569229395846	1.3190368107421e-05	0.000476452089932811	0	54	FFPE-ATAC in FFPE liver
peak_3607	chr1	134687588	134687955	9.94254216733328	6.64076924772748	1.52419882833905	4.35689171534402	1.31922491720933e-05	0.000476452089932811	0	57.5	FFPE-ATAC in FFPE liver
peak_17711	chr12	3167243	3167694	9.94254216733328	6.64076924772748	1.52419882833905	4.35689171534402	1.31922491720933e-05	0.000476452089932811	1	70.5	FFPE-ATAC in FFPE liver
peak_63063	chr4	115322621	115323109	9.94254216733328	6.64076924772748	1.52419882833905	4.35689171534402	1.31922491720933e-05	0.000476452089932811	0	77	FFPE-ATAC in FFPE liver
peak_67823	chr5	73384599	73385011	9.94254216733328	6.64076924772748	1.52419882833905	4.35689171534402	1.31922491720933e-05	0.000476452089932811	0	64	FFPE-ATAC in FFPE liver
peak_71991	chr6	7776961	7777460	9.94254216733328	6.64076924772748	1.52419882833905	4.35689171534402	1.31922491720933e-05	0.000476452089932811	0	78.5	FFPE-ATAC in FFPE liver
peak_83766	chr8	19908302	19909088	9.94254216733328	6.64076924772748	1.52419882833905	4.35689171534402	1.31922491720933e-05	0.000476452089932811	2	124.5	FFPE-ATAC in FFPE liver
peak_88851	chr9	21059958	21060216	9.94254216733328	6.64076924772748	1.52419882833905	4.35689171534402	1.31922491720933e-05	0.000476452089932811	0	40	FFPE-ATAC in FFPE liver
peak_93401	chr9	122952182	122952546	9.94254216733328	6.64076924772748	1.52419882833905	4.35689171534402	1.31922491720933e-05	0.000476452089932811	0	57.5	FFPE-ATAC in FFPE liver
peak_95904	chrY_random	1974862	1975212	9.94254216733328	6.64076924772748	1.52419882833905	4.35689171534402	1.31922491720933e-05	0.000476452089932811	0	55	FFPE-ATAC in FFPE liver
peak_4976	chr1	168423331	168424404	9.94474648326937	6.6409847991945	1.5247167120882	4.35555322935973	1.32731256111009e-05	0.000476452089932811	0	169.5	FFPE-ATAC in FFPE liver
peak_12298	chr11	20090241	20090673	9.94474648326937	6.6409847991945	1.5247167120882	4.35555322935973	1.32731256111009e-05	0.000476452089932811	1	67.5	FFPE-ATAC in FFPE liver
peak_21573	chr12	116305954	116306619	9.94474648326937	6.6409847991945	1.5247167120882	4.35555322935973	1.32731256111009e-05	0.000476452089932811	1	104	FFPE-ATAC in FFPE liver
peak_23901	chr13	57811687	57812169	9.94474648326937	6.6409847991945	1.5247167120882	4.35555322935973	1.32731256111009e-05	0.000476452089932811	0	76.5	FFPE-ATAC in FFPE liver
peak_36416	chr16	69057928	69058339	9.94474648326937	6.6409847991945	1.5247167120882	4.35555322935973	1.32731256111009e-05	0.000476452089932811	1	64.5	FFPE-ATAC in FFPE liver
peak_37492	chr17	3005199	3005417	9.94474648326937	6.6409847991945	1.5247167120882	4.35555322935973	1.32731256111009e-05	0.000476452089932811	0	34.5	FFPE-ATAC in FFPE liver
peak_44247	chr18	80545581	80546002	9.94474648326937	6.6409847991945	1.5247167120882	4.35555322935973	1.32731256111009e-05	0.000476452089932811	0	65.5	FFPE-ATAC in FFPE liver
peak_66361	chr5	24374146	24374562	9.94474648326937	6.6409847991945	1.5247167120882	4.35555322935973	1.32731256111009e-05	0.000476452089932811	1	64.5	FFPE-ATAC in FFPE liver
peak_72285	chr6	22466103	22466478	9.94474648326937	6.6409847991945	1.5247167120882	4.35555322935973	1.32731256111009e-05	0.000476452089932811	0	59	FFPE-ATAC in FFPE liver
peak_80671	chr7	99352352	99352564	9.94474648326937	6.6409847991945	1.5247167120882	4.35555322935973	1.32731256111009e-05	0.000476452089932811	0	33.5	FFPE-ATAC in FFPE liver
peak_85633	chr8	76142870	76143263	9.94474648326937	6.6409847991945	1.5247167120882	4.35555322935973	1.32731256111009e-05	0.000476452089932811	0	61	FFPE-ATAC in FFPE liver
peak_91064	chr9	68947397	68948135	9.94474648326937	6.6409847991945	1.5247167120882	4.35555322935973	1.32731256111009e-05	0.000476452089932811	2.5	117.5	FFPE-ATAC in FFPE liver
peak_95651	chrX	157360508	157360882	9.94474648326937	6.6409847991945	1.5247167120882	4.35555322935973	1.32731256111009e-05	0.000476452089932811	1	59.5	FFPE-ATAC in FFPE liver
peak_27601	chr14	47651407	47651765	9.94180739535458	6.64069716860164	1.52467259732808	4.35549060187685	1.32769213631357e-05	0.000476452089932811	0	56.5	FFPE-ATAC in FFPE liver
peak_37745	chr17	8236213	8236536	9.94180739535458	6.64069716860164	1.52467259732808	4.35549060187685	1.32769213631357e-05	0.000476452089932811	0	50.5	FFPE-ATAC in FFPE liver
peak_44719	chr19	5514440	5514757	9.94180739535458	6.64069716860164	1.52467259732808	4.35549060187685	1.32769213631357e-05	0.000476452089932811	0	49.5	FFPE-ATAC in FFPE liver
peak_60373	chr4	37792757	37793242	9.94180739535458	6.64069716860164	1.52467259732808	4.35549060187685	1.32769213631357e-05	0.000476452089932811	0	75.5	FFPE-ATAC in FFPE liver
peak_69642	chr5	117879452	117879670	9.94180739535458	6.64069716860164	1.52467259732808	4.35549060187685	1.32769213631357e-05	0.000476452089932811	0	33.5	FFPE-ATAC in FFPE liver
peak_95881	chrY	745929	746275	9.94180739535458	6.64069716860164	1.52467259732808	4.35549060187685	1.32769213631357e-05	0.000476452089932811	0	53.5	FFPE-ATAC in FFPE liver
peak_27437	chr14	43544374	43544627	9.94548125524807	6.641057597978	1.52554165318711	4.35324567120389	1.34136689346588e-05	0.000479953792578388	0	39	FFPE-ATAC in FFPE liver
peak_62925	chr4	108702177	108702576	9.94548125524807	6.641057597978	1.52554165318711	4.35324567120389	1.34136689346588e-05	0.000479953792578388	2	63	FFPE-ATAC in FFPE liver
peak_71079	chr5	140342945	140343247	9.94548125524807	6.641057597978	1.52554165318711	4.35324567120389	1.34136689346588e-05	0.000479953792578388	0	47	FFPE-ATAC in FFPE liver
peak_90038	chr9	50731414	50732016	9.94548125524807	6.641057597978	1.52554165318711	4.35324567120389	1.34136689346588e-05	0.000479953792578388	2	94	FFPE-ATAC in FFPE liver
peak_11519	chr10	126930304	126930732	9.94107262337589	6.64062438776207	1.52547521855381	4.35315127180996	1.34194485094808e-05	0.000479953792578388	0	65.5	FFPE-ATAC in FFPE liver
peak_66094	chr5	15167679	15167879	9.94107262337589	6.64062438776207	1.52547521855381	4.35315127180996	1.34194485094808e-05	0.000479953792578388	0	31	FFPE-ATAC in FFPE liver
peak_93477	chrUn_random	2429591	2429800	9.94107262337589	6.64062438776207	1.52547521855381	4.35315127180996	1.34194485094808e-05	0.000479953792578388	0	33	FFPE-ATAC in FFPE liver
peak_88210	chr8	128302844	128303189	14.8673168651571	3.66942005714484	0.843423385145339	4.35062641346199	1.35749166275781e-05	0.000485153082091301	7	75	FFPE-ATAC in FFPE liver
peak_6279	chr1	194490968	194491493	9.94621602722676	6.64113145001158	1.52670441249088	4.34997855228328	1.36150847953949e-05	0.00048532525185721	0	82.5	FFPE-ATAC in FFPE liver
peak_19685	chr12	77280781	77281395	9.94621602722676	6.64113145001158	1.52670441249088	4.34997855228328	1.36150847953949e-05	0.00048532525185721	0	95	FFPE-ATAC in FFPE liver
peak_24279	chr13	65968510	65968993	9.94621602722676	6.64113145001158	1.52670441249088	4.34997855228328	1.36150847953949e-05	0.00048532525185721	0	77	FFPE-ATAC in FFPE liver
peak_31690	chr15	64141904	64142166	9.94621602722676	6.64113145001158	1.52670441249088	4.34997855228328	1.36150847953949e-05	0.00048532525185721	0.5	41.5	FFPE-ATAC in FFPE liver
peak_49124	chr2	35496786	35497416	9.94621602722676	6.64113145001158	1.52670441249088	4.34997855228328	1.36150847953949e-05	0.00048532525185721	1	100.5	FFPE-ATAC in FFPE liver
peak_66082	chr5	15051778	15052361	9.94621602722676	6.64113145001158	1.52670441249088	4.34997855228328	1.36150847953949e-05	0.00048532525185721	1	91	FFPE-ATAC in FFPE liver
peak_93574	chrUn_random	4532760	4532961	24.0022701864538	6.45289093408851	1.48451045602418	4.34681406783128	1.38129214265469e-05	0.000491647916642225	1	75.5	FFPE-ATAC in FFPE liver
peak_66679	chr5	33081786	33082087	16.0888152195964	3.15384882271248	0.725602456203069	4.34652445805646	1.38311635165378e-05	0.000491932818751411	10	67.5	FFPE-ATAC in FFPE liver
peak_33930	chr16	3115480	3115884	15.6822423138661	4.80482888004183	1.10595668947689	4.34450003852727	1.395932190596e-05	0.000496123799484679	4	95.5	FFPE-ATAC in FFPE liver
peak_59603	chr4	3010468	3011061	24.0052092743686	6.45301997800167	1.48548293645381	4.34405526959906	1.39876299155987e-05	0.000496946103567047	3	221	FFPE-ATAC in FFPE liver
peak_38044	chr17	15124552	15125088	14.8661796487198	3.67035956687144	0.845601730975735	4.34052986461633	1.42139547756559e-05	0.000501477766723371	12	117	FFPE-ATAC in FFPE liver
peak_91954	chr9	95445068	95445346	9.94768557118416	6.64128355144446	1.53011101694486	4.34039326421226	1.42227941893416e-05	0.000501477766723371	0	43.5	FFPE-ATAC in FFPE liver
peak_18666	chr12	33995707	33995967	15.6851814017809	4.80502828052044	1.10723877041332	4.33964959403181	1.42710091309751e-05	0.000501477766723371	3	62	FFPE-ATAC in FFPE liver
peak_91530	chr9	78040726	78041083	15.3658265601888	3.37058603641978	0.776846939803575	4.33880326190385	1.43260696722694e-05	0.000501477766723371	11	78.5	FFPE-ATAC in FFPE liver
peak_4132	chr1	148112981	148113400	9.71766075849878	6.60771055011191	1.52438647923628	4.33466882586257	1.45979720410538e-05	0.000501477766723371	0	63.5	FFPE-ATAC in FFPE liver
peak_10054	chr10	91586701	91586923	9.71766075849878	6.60771055011191	1.52438647923628	4.33466882586257	1.45979720410538e-05	0.000501477766723371	0	34	FFPE-ATAC in FFPE liver
peak_12807	chr11	37648124	37648495	9.71766075849878	6.60771055011191	1.52438647923628	4.33466882586257	1.45979720410538e-05	0.000501477766723371	0	56.5	FFPE-ATAC in FFPE liver
peak_14407	chr11	74409078	74409611	9.71766075849878	6.60771055011191	1.52438647923628	4.33466882586257	1.45979720410538e-05	0.000501477766723371	0	81.5	FFPE-ATAC in FFPE liver
peak_15995	chr11	99122804	99123715	9.71766075849878	6.60771055011191	1.52438647923628	4.33466882586257	1.45979720410538e-05	0.000501477766723371	3	138	FFPE-ATAC in FFPE liver
peak_18008	chr12	12641975	12642338	9.71766075849878	6.60771055011191	1.52438647923628	4.33466882586257	1.45979720410538e-05	0.000501477766723371	0	55	FFPE-ATAC in FFPE liver
peak_29232	chr14	95623332	95623684	9.71766075849878	6.60771055011191	1.52438647923628	4.33466882586257	1.45979720410538e-05	0.000501477766723371	0	54	FFPE-ATAC in FFPE liver
peak_32769	chr15	83568043	83569521	9.71766075849878	6.60771055011191	1.52438647923628	4.33466882586257	1.45979720410538e-05	0.000501477766723371	0	227.5	FFPE-ATAC in FFPE liver
peak_33427	chr15	97432101	97432484	9.71766075849878	6.60771055011191	1.52438647923628	4.33466882586257	1.45979720410538e-05	0.000501477766723371	0	59.5	FFPE-ATAC in FFPE liver
peak_41974	chr18	15801037	15801390	9.71766075849878	6.60771055011191	1.52438647923628	4.33466882586257	1.45979720410538e-05	0.000501477766723371	0	53.5	FFPE-ATAC in FFPE liver
peak_42220	chr18	30161600	30161955	9.71766075849878	6.60771055011191	1.52438647923628	4.33466882586257	1.45979720410538e-05	0.000501477766723371	0	54.5	FFPE-ATAC in FFPE liver
peak_45771	chr19	30472322	30472674	9.71766075849878	6.60771055011191	1.52438647923628	4.33466882586257	1.45979720410538e-05	0.000501477766723371	0	53	FFPE-ATAC in FFPE liver
peak_48183	chr2	22599047	22599388	9.71766075849878	6.60771055011191	1.52438647923628	4.33466882586257	1.45979720410538e-05	0.000501477766723371	0	52	FFPE-ATAC in FFPE liver
peak_73561	chr6	54406271	54406670	9.71766075849878	6.60771055011191	1.52438647923628	4.33466882586257	1.45979720410538e-05	0.000501477766723371	1	61	FFPE-ATAC in FFPE liver
peak_8142	chr10	53917040	53917398	9.71692598652008	6.60763777770499	1.52437570421245	4.33465172624143	1.45991067547625e-05	0.000501477766723371	0	54.5	FFPE-ATAC in FFPE liver
peak_20907	chr12	105055742	105056081	9.71692598652008	6.60763777770499	1.52437570421245	4.33465172624143	1.45991067547625e-05	0.000501477766723371	0	51	FFPE-ATAC in FFPE liver
peak_22701	chr13	34313318	34313616	9.71692598652008	6.60763777770499	1.52437570421245	4.33465172624143	1.45991067547625e-05	0.000501477766723371	0	45.5	FFPE-ATAC in FFPE liver
peak_24388	chr13	69373759	69374118	9.71692598652008	6.60763777770499	1.52437570421245	4.33465172624143	1.45991067547625e-05	0.000501477766723371	0	54.5	FFPE-ATAC in FFPE liver
peak_25748	chr13	112960724	112961179	9.71692598652008	6.60763777770499	1.52437570421245	4.33465172624143	1.45991067547625e-05	0.000501477766723371	1	70	FFPE-ATAC in FFPE liver
peak_26213	chr14	9191693	9192836	9.71692598652008	6.60763777770499	1.52437570421245	4.33465172624143	1.45991067547625e-05	0.000501477766723371	0	173	FFPE-ATAC in FFPE liver
peak_30121	chr15	7726092	7726452	9.71692598652008	6.60763777770499	1.52437570421245	4.33465172624143	1.45991067547625e-05	0.000501477766723371	0	54	FFPE-ATAC in FFPE liver
peak_37743	chr17	8145072	8145428	9.71692598652008	6.60763777770499	1.52437570421245	4.33465172624143	1.45991067547625e-05	0.000501477766723371	0	54	FFPE-ATAC in FFPE liver
peak_44301	chr18	82152143	82152596	9.71692598652008	6.60763777770499	1.52437570421245	4.33465172624143	1.45991067547625e-05	0.000501477766723371	0	69	FFPE-ATAC in FFPE liver
peak_49532	chr2	51695486	51695932	9.71692598652008	6.60763777770499	1.52437570421245	4.33465172624143	1.45991067547625e-05	0.000501477766723371	0	67.5	FFPE-ATAC in FFPE liver
peak_65668	chr4	152917499	152917988	9.71692598652008	6.60763777770499	1.52437570421245	4.33465172624143	1.45991067547625e-05	0.000501477766723371	1	74.5	FFPE-ATAC in FFPE liver
peak_69656	chr5	118349756	118350243	9.71692598652008	6.60763777770499	1.52437570421245	4.33465172624143	1.45991067547625e-05	0.000501477766723371	0	73.5	FFPE-ATAC in FFPE liver
peak_71223	chr5	143064704	143065081	9.71692598652008	6.60763777770499	1.52437570421245	4.33465172624143	1.45991067547625e-05	0.000501477766723371	2	58.5	FFPE-ATAC in FFPE liver
peak_73660	chr6	56183521	56183900	9.71692598652008	6.60763777770499	1.52437570421245	4.33465172624143	1.45991067547625e-05	0.000501477766723371	0	57.5	FFPE-ATAC in FFPE liver
peak_76454	chr6	128579041	128579280	9.71692598652008	6.60763777770499	1.52437570421245	4.33465172624143	1.45991067547625e-05	0.000501477766723371	0	36.5	FFPE-ATAC in FFPE liver
peak_82958	chr7	148838372	148839185	9.71692598652008	6.60763777770499	1.52437570421245	4.33465172624143	1.45991067547625e-05	0.000501477766723371	0	122	FFPE-ATAC in FFPE liver
peak_84491	chr8	38369490	38369840	9.71692598652008	6.60763777770499	1.52437570421245	4.33465172624143	1.45991067547625e-05	0.000501477766723371	0	53	FFPE-ATAC in FFPE liver
peak_84513	chr8	40452194	40452678	9.71692598652008	6.60763777770499	1.52437570421245	4.33465172624143	1.45991067547625e-05	0.000501477766723371	1	72.5	FFPE-ATAC in FFPE liver
peak_88163	chr8	127536364	127536985	9.71692598652008	6.60763777770499	1.52437570421245	4.33465172624143	1.45991067547625e-05	0.000501477766723371	0	94	FFPE-ATAC in FFPE liver
peak_93437	chr9	123700788	123701241	9.71692598652008	6.60763777770499	1.52437570421245	4.33465172624143	1.45991067547625e-05	0.000501477766723371	2	70	FFPE-ATAC in FFPE liver
peak_94730	chrX	79499261	79499470	9.71692598652008	6.60763777770499	1.52437570421245	4.33465172624143	1.45991067547625e-05	0.000501477766723371	0	32	FFPE-ATAC in FFPE liver
peak_95176	chrX	112289596	112290011	9.71692598652008	6.60763777770499	1.52437570421245	4.33465172624143	1.45991067547625e-05	0.000501477766723371	0	64	FFPE-ATAC in FFPE liver
peak_95892	chrY	1978729	1978935	9.71692598652008	6.60763777770499	1.52437570421245	4.33465172624143	1.45991067547625e-05	0.000501477766723371	0	31.5	FFPE-ATAC in FFPE liver
peak_95925	chrY_random	7423515	7423844	9.71692598652008	6.60763777770499	1.52437570421245	4.33465172624143	1.45991067547625e-05	0.000501477766723371	0	50.5	FFPE-ATAC in FFPE liver
peak_96065	chrY_random	46728087	46728434	9.71692598652008	6.60763777770499	1.52437570421245	4.33465172624143	1.45991067547625e-05	0.000501477766723371	0	52	FFPE-ATAC in FFPE liver
peak_889	chr1	42296157	42296389	9.71839553047748	6.60778351540337	1.52472970267381	4.33374092720551	1.46596681663325e-05	0.000501477766723371	0	35	FFPE-ATAC in FFPE liver
peak_1633	chr1	69293345	69293724	9.71839553047748	6.60778351540337	1.52472970267381	4.33374092720551	1.46596681663325e-05	0.000501477766723371	0	58	FFPE-ATAC in FFPE liver
peak_3167	chr1	125569612	125570027	9.71839553047748	6.60778351540337	1.52472970267381	4.33374092720551	1.46596681663325e-05	0.000501477766723371	0	64	FFPE-ATAC in FFPE liver
peak_6597	chr10	7622423	7622831	9.71839553047748	6.60778351540337	1.52472970267381	4.33374092720551	1.46596681663325e-05	0.000501477766723371	1	62.5	FFPE-ATAC in FFPE liver
peak_8076	chr10	52248161	52249033	9.71839553047748	6.60778351540337	1.52472970267381	4.33374092720551	1.46596681663325e-05	0.000501477766723371	0	133	FFPE-ATAC in FFPE liver
peak_11064	chr10	117719993	117720350	9.71839553047748	6.60778351540337	1.52472970267381	4.33374092720551	1.46596681663325e-05	0.000501477766723371	0	54	FFPE-ATAC in FFPE liver
peak_11273	chr10	121431257	121431866	9.71839553047748	6.60778351540337	1.52472970267381	4.33374092720551	1.46596681663325e-05	0.000501477766723371	2	92	FFPE-ATAC in FFPE liver
peak_12436	chr11	22741781	22742032	9.71839553047748	6.60778351540337	1.52472970267381	4.33374092720551	1.46596681663325e-05	0.000501477766723371	0	38.5	FFPE-ATAC in FFPE liver
peak_29233	chr14	95657107	95657745	9.71839553047748	6.60778351540337	1.52472970267381	4.33374092720551	1.46596681663325e-05	0.000501477766723371	0	97	FFPE-ATAC in FFPE liver
peak_30379	chr15	17529441	17529702	9.71839553047748	6.60778351540337	1.52472970267381	4.33374092720551	1.46596681663325e-05	0.000501477766723371	0	39.5	FFPE-ATAC in FFPE liver
peak_31926	chr15	73548000	73548354	9.71839553047748	6.60778351540337	1.52472970267381	4.33374092720551	1.46596681663325e-05	0.000501477766723371	0	54	FFPE-ATAC in FFPE liver
peak_33121	chr15	89919404	89920141	9.71839553047748	6.60778351540337	1.52472970267381	4.33374092720551	1.46596681663325e-05	0.000501477766723371	1	114	FFPE-ATAC in FFPE liver
peak_34356	chr16	12761741	12762177	9.71839553047748	6.60778351540337	1.52472970267381	4.33374092720551	1.46596681663325e-05	0.000501477766723371	0	66.5	FFPE-ATAC in FFPE liver
peak_36567	chr16	76859783	76860138	9.71839553047748	6.60778351540337	1.52472970267381	4.33374092720551	1.46596681663325e-05	0.000501477766723371	0	54	FFPE-ATAC in FFPE liver
peak_36660	chr16	81161684	81161967	9.71839553047748	6.60778351540337	1.52472970267381	4.33374092720551	1.46596681663325e-05	0.000501477766723371	0.5	43	FFPE-ATAC in FFPE liver
peak_37299	chr16	95206135	95206702	9.71839553047748	6.60778351540337	1.52472970267381	4.33374092720551	1.46596681663325e-05	0.000501477766723371	0	87	FFPE-ATAC in FFPE liver
peak_38386	chr17	25755116	25755519	9.71839553047748	6.60778351540337	1.52472970267381	4.33374092720551	1.46596681663325e-05	0.000501477766723371	2	62.5	FFPE-ATAC in FFPE liver
peak_47031	chr19	53840388	53840607	9.71839553047748	6.60778351540337	1.52472970267381	4.33374092720551	1.46596681663325e-05	0.000501477766723371	0	33.5	FFPE-ATAC in FFPE liver
peak_49047	chr2	34619945	34620520	9.71839553047748	6.60778351540337	1.52472970267381	4.33374092720551	1.46596681663325e-05	0.000501477766723371	2	86.5	FFPE-ATAC in FFPE liver
peak_53009	chr2	154189123	154189692	9.71839553047748	6.60778351540337	1.52472970267381	4.33374092720551	1.46596681663325e-05	0.000501477766723371	1	87	FFPE-ATAC in FFPE liver
peak_60724	chr4	45606698	45607478	9.71839553047748	6.60778351540337	1.52472970267381	4.33374092720551	1.46596681663325e-05	0.000501477766723371	0	119	FFPE-ATAC in FFPE liver
peak_61924	chr4	82381989	82382384	9.71839553047748	6.60778351540337	1.52472970267381	4.33374092720551	1.46596681663325e-05	0.000501477766723371	0	60.5	FFPE-ATAC in FFPE liver
peak_62330	chr4	97755554	97755762	9.71839553047748	6.60778351540337	1.52472970267381	4.33374092720551	1.46596681663325e-05	0.000501477766723371	0	32	FFPE-ATAC in FFPE liver
peak_69497	chr5	115731932	115732344	9.71839553047748	6.60778351540337	1.52472970267381	4.33374092720551	1.46596681663325e-05	0.000501477766723371	0	63	FFPE-ATAC in FFPE liver
peak_72687	chr6	32996498	32996899	9.71839553047748	6.60778351540337	1.52472970267381	4.33374092720551	1.46596681663325e-05	0.000501477766723371	0	61	FFPE-ATAC in FFPE liver
peak_73931	chr6	71612889	71613404	9.71839553047748	6.60778351540337	1.52472970267381	4.33374092720551	1.46596681663325e-05	0.000501477766723371	0	78	FFPE-ATAC in FFPE liver
peak_79013	chr7	48791824	48792164	9.71839553047748	6.60778351540337	1.52472970267381	4.33374092720551	1.46596681663325e-05	0.000501477766723371	0	52	FFPE-ATAC in FFPE liver
peak_79314	chr7	54851089	54851385	9.71839553047748	6.60778351540337	1.52472970267381	4.33374092720551	1.46596681663325e-05	0.000501477766723371	0	45.5	FFPE-ATAC in FFPE liver
peak_83987	chr8	26376800	26377547	9.71839553047748	6.60778351540337	1.52472970267381	4.33374092720551	1.46596681663325e-05	0.000501477766723371	2	113	FFPE-ATAC in FFPE liver
peak_89852	chr9	47028942	47029515	9.71839553047748	6.60778351540337	1.52472970267381	4.33374092720551	1.46596681663325e-05	0.000501477766723371	0	88	FFPE-ATAC in FFPE liver
peak_90782	chr9	64590974	64591575	9.71839553047748	6.60778351540337	1.52472970267381	4.33374092720551	1.46596681663325e-05	0.000501477766723371	0	92	FFPE-ATAC in FFPE liver
peak_91376	chr9	74427536	74428000	9.71839553047748	6.60778351540337	1.52472970267381	4.33374092720551	1.46596681663325e-05	0.000501477766723371	0	72	FFPE-ATAC in FFPE liver
peak_92124	chr9	99493789	99494246	9.71839553047748	6.60778351540337	1.52472970267381	4.33374092720551	1.46596681663325e-05	0.000501477766723371	1	70.5	FFPE-ATAC in FFPE liver
peak_93482	chrUn_random	2483698	2483908	9.71839553047748	6.60778351540337	1.52472970267381	4.33374092720551	1.46596681663325e-05	0.000501477766723371	0	32	FFPE-ATAC in FFPE liver
peak_95534	chrX	147095900	147096311	9.71839553047748	6.60778351540337	1.52472970267381	4.33374092720551	1.46596681663325e-05	0.000501477766723371	1	63	FFPE-ATAC in FFPE liver
peak_2912	chr1	109744685	109745008	9.71619121454139	6.60756482033472	1.52469732064354	4.33368953356973	1.46630925942506e-05	0.000501477766723371	0	48.5	FFPE-ATAC in FFPE liver
peak_14351	chr11	72716446	72716875	9.71619121454139	6.60756482033472	1.52469732064354	4.33368953356973	1.46630925942506e-05	0.000501477766723371	2	65.5	FFPE-ATAC in FFPE liver
peak_32085	chr15	75933595	75933911	9.71619121454139	6.60756482033472	1.52469732064354	4.33368953356973	1.46630925942506e-05	0.000501477766723371	0	48	FFPE-ATAC in FFPE liver
peak_36747	chr16	85553145	85553572	9.71619121454139	6.60756482033472	1.52469732064354	4.33368953356973	1.46630925942506e-05	0.000501477766723371	1	64.5	FFPE-ATAC in FFPE liver
peak_51787	chr2	122150832	122151144	9.71619121454139	6.60756482033472	1.52469732064354	4.33368953356973	1.46630925942506e-05	0.000501477766723371	0	47	FFPE-ATAC in FFPE liver
peak_55846	chr3	56173080	56173341	9.71619121454139	6.60756482033472	1.52469732064354	4.33368953356973	1.46630925942506e-05	0.000501477766723371	0	40	FFPE-ATAC in FFPE liver
peak_59036	chr3	142851566	142852013	9.71619121454139	6.60756482033472	1.52469732064354	4.33368953356973	1.46630925942506e-05	0.000501477766723371	0	68.5	FFPE-ATAC in FFPE liver
peak_61421	chr4	60827924	60828558	9.71619121454139	6.60756482033472	1.52469732064354	4.33368953356973	1.46630925942506e-05	0.000501477766723371	0	97	FFPE-ATAC in FFPE liver
peak_64737	chr4	138919095	138919446	9.71619121454139	6.60756482033472	1.52469732064354	4.33368953356973	1.46630925942506e-05	0.000501477766723371	0	52.5	FFPE-ATAC in FFPE liver
peak_77380	chr6	146378187	146378391	9.71619121454139	6.60756482033472	1.52469732064354	4.33368953356973	1.46630925942506e-05	0.000501477766723371	0.5	31.5	FFPE-ATAC in FFPE liver
peak_78751	chr7	35420418	35420646	9.71619121454139	6.60756482033472	1.52469732064354	4.33368953356973	1.46630925942506e-05	0.000501477766723371	0	35	FFPE-ATAC in FFPE liver
peak_80868	chr7	106106176	106106527	9.71619121454139	6.60756482033472	1.52469732064354	4.33368953356973	1.46630925942506e-05	0.000501477766723371	0	53.5	FFPE-ATAC in FFPE liver
peak_93481	chrUn_random	2461448	2461656	9.71619121454139	6.60756482033472	1.52469732064354	4.33368953356973	1.46630925942506e-05	0.000501477766723371	0	31.5	FFPE-ATAC in FFPE liver
peak_95896	chrY	2536847	2537198	9.71619121454139	6.60756482033472	1.52469732064354	4.33368953356973	1.46630925942506e-05	0.000501477766723371	0	53.5	FFPE-ATAC in FFPE liver
peak_54587	chr2	181664932	181665291	15.6866509457383	4.80513006907542	1.10914723714714	4.33227429879804	1.47576918850712e-05	0.000502822540426247	3	85.5	FFPE-ATAC in FFPE liver
peak_21816	chr13	4605158	4605404	9.71913030245618	6.60785704916752	1.52540919512424	4.33185867129201	1.47855842635791e-05	0.000502822540426247	0	37.5	FFPE-ATAC in FFPE liver
peak_23016	chr13	39255144	39255574	9.71913030245618	6.60785704916752	1.52540919512424	4.33185867129201	1.47855842635791e-05	0.000502822540426247	1	65.5	FFPE-ATAC in FFPE liver
peak_24842	chr13	93266236	93266637	9.71913030245618	6.60785704916752	1.52540919512424	4.33185867129201	1.47855842635791e-05	0.000502822540426247	1	60.5	FFPE-ATAC in FFPE liver
peak_31037	chr15	40982677	40983194	9.71913030245618	6.60785704916752	1.52540919512424	4.33185867129201	1.47855842635791e-05	0.000502822540426247	0	78.5	FFPE-ATAC in FFPE liver
peak_41385	chr17	88719409	88720168	9.71913030245618	6.60785704916752	1.52540919512424	4.33185867129201	1.47855842635791e-05	0.000502822540426247	0.5	115	FFPE-ATAC in FFPE liver
peak_41564	chr18	5090268	5090652	9.71913030245618	6.60785704916752	1.52540919512424	4.33185867129201	1.47855842635791e-05	0.000502822540426247	1	60	FFPE-ATAC in FFPE liver
peak_43521	chr18	62913088	62914083	9.71913030245618	6.60785704916752	1.52540919512424	4.33185867129201	1.47855842635791e-05	0.000502822540426247	0	150	FFPE-ATAC in FFPE liver
peak_56642	chr3	84874809	84875384	9.71913030245618	6.60785704916752	1.52540919512424	4.33185867129201	1.47855842635791e-05	0.000502822540426247	0	88.5	FFPE-ATAC in FFPE liver
peak_75602	chr6	114453338	114453586	9.71913030245618	6.60785704916752	1.52540919512424	4.33185867129201	1.47855842635791e-05	0.000502822540426247	0	38.5	FFPE-ATAC in FFPE liver
peak_78994	chr7	48333085	48333711	9.71913030245618	6.60785704916752	1.52540919512424	4.33185867129201	1.47855842635791e-05	0.000502822540426247	1	95.5	FFPE-ATAC in FFPE liver
peak_84510	chr8	40240613	40241318	9.71913030245618	6.60785704916752	1.52540919512424	4.33185867129201	1.47855842635791e-05	0.000502822540426247	0	108.5	FFPE-ATAC in FFPE liver
peak_55020	chr3	26623828	26624602	9.71545644256269	6.60749130185851	1.52535503820182	4.33177269316121	1.47913604481176e-05	0.000502822540426247	2	116.5	FFPE-ATAC in FFPE liver
peak_61394	chr4	60524153	60524908	9.71545644256269	6.60749130185851	1.52535503820182	4.33177269316121	1.47913604481176e-05	0.000502822540426247	1	115	FFPE-ATAC in FFPE liver
peak_66092	chr5	15151997	15152349	9.71545644256269	6.60749130185851	1.52535503820182	4.33177269316121	1.47913604481176e-05	0.000502822540426247	0	53	FFPE-ATAC in FFPE liver
peak_87349	chr8	117914420	117914644	9.71545644256269	6.60749130185851	1.52535503820182	4.33177269316121	1.47913604481176e-05	0.000502822540426247	0	34.5	FFPE-ATAC in FFPE liver
peak_15488	chr11	93438714	93438952	9.71986507443487	6.60793152131118	1.5264325979925	4.32900314760157	1.4978579317562e-05	0.000507750063342625	0	36	FFPE-ATAC in FFPE liver
peak_24421	chr13	69861354	69861737	9.71986507443487	6.60793152131118	1.5264325979925	4.32900314760157	1.4978579317562e-05	0.000507750063342625	1.5	59.5	FFPE-ATAC in FFPE liver
peak_37117	chr16	92802868	92803126	9.71986507443487	6.60793152131118	1.5264325979925	4.32900314760157	1.4978579317562e-05	0.000507750063342625	0	39	FFPE-ATAC in FFPE liver
peak_41488	chr18	3777754	3778111	9.71986507443487	6.60793152131118	1.5264325979925	4.32900314760157	1.4978579317562e-05	0.000507750063342625	1	54.5	FFPE-ATAC in FFPE liver
peak_38046	chr17	15146131	15146521	9.71472167058399	6.60741685202259	1.52635639555498	4.32888208236593	1.49868145483873e-05	0.000507850088762031	0	59.5	FFPE-ATAC in FFPE liver
peak_19071	chr12	55839079	55840132	23.5488335088913	6.4250780563951	1.48513451642327	4.3262600022717	1.51662394334181e-05	0.000512845159053607	8	383.5	FFPE-ATAC in FFPE liver
peak_21619	chr12	117062162	117062585	9.72059984641357	6.60800727265559	1.52781152029961	4.32514559869253	1.52431149247947e-05	0.000514720249649551	2	65	FFPE-ATAC in FFPE liver
peak_38379	chr17	25588635	25588847	9.72059984641357	6.60800727265559	1.52781152029961	4.32514559869253	1.52431149247947e-05	0.000514720249649551	0	32.5	FFPE-ATAC in FFPE liver
peak_66070	chr5	14970562	14970935	9.72059984641357	6.60800727265559	1.52781152029961	4.32514559869253	1.52431149247947e-05	0.000514720249649551	0	57	FFPE-ATAC in FFPE liver
peak_90368	chr9	57882532	57882819	9.72059984641357	6.60800727265559	1.52781152029961	4.32514559869253	1.52431149247947e-05	0.000514720249649551	0	44	FFPE-ATAC in FFPE liver
peak_88479	chr8_random	819523	820225	23.5491658364114	6.42556848674895	1.48629563862276	4.32321021455937	1.5377508215794e-05	0.000518711581100116	4	256.5	FFPE-ATAC in FFPE liver
peak_28036	chr14	57193246	57193446	15.4573609050316	4.78320892860483	1.10699344022655	4.32090087871337	1.553934705665e-05	0.000523435797700029	2	47	FFPE-ATAC in FFPE liver
peak_93497	chrUn_random	3549401	3550449	15.4573609050316	4.78320892860483	1.10699344022655	4.32090087871337	1.553934705665e-05	0.000523435797700029	8	246.5	FFPE-ATAC in FFPE liver
peak_88461	chr8_random	695797	695997	14.59402090648	4.08590467867613	0.947022433716728	4.3144750675445	1.59982587105162e-05	0.000530074171254681	3	43	FFPE-ATAC in FFPE liver
peak_1206	chr1	56065298	56065765	9.49130980570689	6.57372688228298	1.52476860378087	4.31129475382858	1.62301383267053e-05	0.000530074171254681	1	70	FFPE-ATAC in FFPE liver
peak_1745	chr1	72742794	72743240	9.49130980570689	6.57372688228298	1.52476860378087	4.31129475382858	1.62301383267053e-05	0.000530074171254681	0	66	FFPE-ATAC in FFPE liver
peak_12928	chr11	44469507	44469715	9.49130980570689	6.57372688228298	1.52476860378087	4.31129475382858	1.62301383267053e-05	0.000530074171254681	0	30.5	FFPE-ATAC in FFPE liver
peak_15481	chr11	92474185	92474393	9.49130980570689	6.57372688228298	1.52476860378087	4.31129475382858	1.62301383267053e-05	0.000530074171254681	0	30.5	FFPE-ATAC in FFPE liver
peak_15598	chr11	94921604	94922269	9.49130980570689	6.57372688228298	1.52476860378087	4.31129475382858	1.62301383267053e-05	0.000530074171254681	1	100.5	FFPE-ATAC in FFPE liver
peak_18772	chr12	39217745	39218491	9.49130980570689	6.57372688228298	1.52476860378087	4.31129475382858	1.62301383267053e-05	0.000530074171254681	1	112	FFPE-ATAC in FFPE liver
peak_19251	chr12	64212357	64212712	9.49130980570689	6.57372688228298	1.52476860378087	4.31129475382858	1.62301383267053e-05	0.000530074171254681	0	53	FFPE-ATAC in FFPE liver
peak_20582	chr12	99591003	99591213	9.49130980570689	6.57372688228298	1.52476860378087	4.31129475382858	1.62301383267053e-05	0.000530074171254681	0	31	FFPE-ATAC in FFPE liver
peak_26083	chr14	4925012	4925361	9.49130980570689	6.57372688228298	1.52476860378087	4.31129475382858	1.62301383267053e-05	0.000530074171254681	0	52	FFPE-ATAC in FFPE liver
peak_26098	chr14	6174236	6174598	9.49130980570689	6.57372688228298	1.52476860378087	4.31129475382858	1.62301383267053e-05	0.000530074171254681	0	53.5	FFPE-ATAC in FFPE liver
peak_30382	chr15	18268416	18268765	9.49130980570689	6.57372688228298	1.52476860378087	4.31129475382858	1.62301383267053e-05	0.000530074171254681	0	52.5	FFPE-ATAC in FFPE liver
peak_34548	chr16	17560234	17560699	9.49130980570689	6.57372688228298	1.52476860378087	4.31129475382858	1.62301383267053e-05	0.000530074171254681	1	69.5	FFPE-ATAC in FFPE liver
peak_36456	chr16	71819966	71820455	9.49130980570689	6.57372688228298	1.52476860378087	4.31129475382858	1.62301383267053e-05	0.000530074171254681	0	73	FFPE-ATAC in FFPE liver
peak_37659	chr17	5892937	5893639	9.49130980570689	6.57372688228298	1.52476860378087	4.31129475382858	1.62301383267053e-05	0.000530074171254681	0	104	FFPE-ATAC in FFPE liver
peak_44169	chr18	77825870	77826342	9.49130980570689	6.57372688228298	1.52476860378087	4.31129475382858	1.62301383267053e-05	0.000530074171254681	0	71	FFPE-ATAC in FFPE liver
peak_47914	chr2	11560789	11561494	9.49130980570689	6.57372688228298	1.52476860378087	4.31129475382858	1.62301383267053e-05	0.000530074171254681	0	105	FFPE-ATAC in FFPE liver
peak_53806	chr2	166709081	166709770	9.49130980570689	6.57372688228298	1.52476860378087	4.31129475382858	1.62301383267053e-05	0.000530074171254681	1	104	FFPE-ATAC in FFPE liver
peak_55586	chr3	43954859	43955254	9.49130980570689	6.57372688228298	1.52476860378087	4.31129475382858	1.62301383267053e-05	0.000530074171254681	0	58	FFPE-ATAC in FFPE liver
peak_61360	chr4	60102623	60103194	9.49130980570689	6.57372688228298	1.52476860378087	4.31129475382858	1.62301383267053e-05	0.000530074171254681	0.5	84.5	FFPE-ATAC in FFPE liver
peak_65363	chr4	149131092	149131569	9.49130980570689	6.57372688228298	1.52476860378087	4.31129475382858	1.62301383267053e-05	0.000530074171254681	0	71	FFPE-ATAC in FFPE liver
peak_71137	chr5	141096484	141096693	9.49130980570689	6.57372688228298	1.52476860378087	4.31129475382858	1.62301383267053e-05	0.000530074171254681	0	31.5	FFPE-ATAC in FFPE liver
peak_74520	chr6	87281889	87282523	9.49130980570689	6.57372688228298	1.52476860378087	4.31129475382858	1.62301383267053e-05	0.000530074171254681	0	94.5	FFPE-ATAC in FFPE liver
peak_75820	chr6	117656222	117656575	9.49130980570689	6.57372688228298	1.52476860378087	4.31129475382858	1.62301383267053e-05	0.000530074171254681	0.5	53	FFPE-ATAC in FFPE liver
peak_76955	chr6	140047295	140047812	9.49130980570689	6.57372688228298	1.52476860378087	4.31129475382858	1.62301383267053e-05	0.000530074171254681	0	76.5	FFPE-ATAC in FFPE liver
peak_78981	chr7	47327617	47327823	9.49130980570689	6.57372688228298	1.52476860378087	4.31129475382858	1.62301383267053e-05	0.000530074171254681	0	31	FFPE-ATAC in FFPE liver
peak_81426	chr7	118384413	118384897	9.49130980570689	6.57372688228298	1.52476860378087	4.31129475382858	1.62301383267053e-05	0.000530074171254681	0	73	FFPE-ATAC in FFPE liver
peak_82723	chr7	145265439	145266062	9.49130980570689	6.57372688228298	1.52476860378087	4.31129475382858	1.62301383267053e-05	0.000530074171254681	0	93.5	FFPE-ATAC in FFPE liver
peak_85711	chr8	80153055	80153418	9.49130980570689	6.57372688228298	1.52476860378087	4.31129475382858	1.62301383267053e-05	0.000530074171254681	0	54.5	FFPE-ATAC in FFPE liver
peak_86627	chr8	102789060	102789400	9.49130980570689	6.57372688228298	1.52476860378087	4.31129475382858	1.62301383267053e-05	0.000530074171254681	0	51	FFPE-ATAC in FFPE liver
peak_87283	chr8	116725601	116725954	9.49130980570689	6.57372688228298	1.52476860378087	4.31129475382858	1.62301383267053e-05	0.000530074171254681	0	52.5	FFPE-ATAC in FFPE liver
peak_88238	chr8	128885817	128886025	9.49130980570689	6.57372688228298	1.52476860378087	4.31129475382858	1.62301383267053e-05	0.000530074171254681	0	31	FFPE-ATAC in FFPE liver
peak_94442	chrX	51141555	51141954	9.49130980570689	6.57372688228298	1.52476860378087	4.31129475382858	1.62301383267053e-05	0.000530074171254681	0	60	FFPE-ATAC in FFPE liver
peak_94563	chrX	68748533	68748990	9.49130980570689	6.57372688228298	1.52476860378087	4.31129475382858	1.62301383267053e-05	0.000530074171254681	1	68	FFPE-ATAC in FFPE liver
peak_96037	chrY_random	39420649	39420996	9.49130980570689	6.57372688228298	1.52476860378087	4.31129475382858	1.62301383267053e-05	0.000530074171254681	0	51.5	FFPE-ATAC in FFPE liver
peak_1544	chr1	65043268	65043797	9.49204457768558	6.57380087425629	1.52495029060183	4.31082961508332	1.6264319371468e-05	0.000530074171254681	0	79	FFPE-ATAC in FFPE liver
peak_4398	chr1	156054137	156054385	9.49204457768558	6.57380087425629	1.52495029060183	4.31082961508332	1.6264319371468e-05	0.000530074171254681	0	37	FFPE-ATAC in FFPE liver
peak_8077	chr10	52249110	52249972	9.49204457768558	6.57380087425629	1.52495029060183	4.31082961508332	1.6264319371468e-05	0.000530074171254681	0	127	FFPE-ATAC in FFPE liver
peak_13541	chr11	57884244	57884587	9.49204457768558	6.57380087425629	1.52495029060183	4.31082961508332	1.6264319371468e-05	0.000530074171254681	0	51	FFPE-ATAC in FFPE liver
peak_24254	chr13	65482049	65482267	9.49204457768558	6.57380087425629	1.52495029060183	4.31082961508332	1.6264319371468e-05	0.000530074171254681	0	32.5	FFPE-ATAC in FFPE liver
peak_33203	chr15	92980617	92980830	9.49204457768558	6.57380087425629	1.52495029060183	4.31082961508332	1.6264319371468e-05	0.000530074171254681	0	31.5	FFPE-ATAC in FFPE liver
peak_36665	chr16	81317764	81318229	9.49204457768558	6.57380087425629	1.52495029060183	4.31082961508332	1.6264319371468e-05	0.000530074171254681	2	70	FFPE-ATAC in FFPE liver
peak_40947	chr17	81683621	81684018	9.49204457768558	6.57380087425629	1.52495029060183	4.31082961508332	1.6264319371468e-05	0.000530074171254681	0	58	FFPE-ATAC in FFPE liver
peak_41453	chr17_random	273715	274112	9.49204457768558	6.57380087425629	1.52495029060183	4.31082961508332	1.6264319371468e-05	0.000530074171254681	0	58.5	FFPE-ATAC in FFPE liver
peak_43829	chr18	68678532	68678977	9.49204457768558	6.57380087425629	1.52495029060183	4.31082961508332	1.6264319371468e-05	0.000530074171254681	0	67.5	FFPE-ATAC in FFPE liver
peak_48872	chr2	32257121	32257445	9.49204457768558	6.57380087425629	1.52495029060183	4.31082961508332	1.6264319371468e-05	0.000530074171254681	0	48.5	FFPE-ATAC in FFPE liver
peak_49356	chr2	43755766	43756263	9.49204457768558	6.57380087425629	1.52495029060183	4.31082961508332	1.6264319371468e-05	0.000530074171254681	1	73.5	FFPE-ATAC in FFPE liver
peak_54992	chr3	24058690	24059045	9.49204457768558	6.57380087425629	1.52495029060183	4.31082961508332	1.6264319371468e-05	0.000530074171254681	0	53	FFPE-ATAC in FFPE liver
peak_58200	chr3	120570126	120570544	9.49204457768558	6.57380087425629	1.52495029060183	4.31082961508332	1.6264319371468e-05	0.000530074171254681	0	63.5	FFPE-ATAC in FFPE liver
peak_60368	chr4	36780829	36781236	9.49204457768558	6.57380087425629	1.52495029060183	4.31082961508332	1.6264319371468e-05	0.000530074171254681	0	61	FFPE-ATAC in FFPE liver
peak_62262	chr4	96173017	96173362	9.49204457768558	6.57380087425629	1.52495029060183	4.31082961508332	1.6264319371468e-05	0.000530074171254681	0	51	FFPE-ATAC in FFPE liver
peak_65712	chr4	153900185	153900508	9.49204457768558	6.57380087425629	1.52495029060183	4.31082961508332	1.6264319371468e-05	0.000530074171254681	0	48.5	FFPE-ATAC in FFPE liver
peak_72564	chr6	30578966	30579444	9.49204457768558	6.57380087425629	1.52495029060183	4.31082961508332	1.6264319371468e-05	0.000530074171254681	0	72	FFPE-ATAC in FFPE liver
peak_76345	chr6	126732491	126733111	9.49204457768558	6.57380087425629	1.52495029060183	4.31082961508332	1.6264319371468e-05	0.000530074171254681	1	93	FFPE-ATAC in FFPE liver
peak_84502	chr8	39660252	39660466	9.49204457768558	6.57380087425629	1.52495029060183	4.31082961508332	1.6264319371468e-05	0.000530074171254681	0	32	FFPE-ATAC in FFPE liver
peak_88455	chr8_random	601356	602058	9.49204457768558	6.57380087425629	1.52495029060183	4.31082961508332	1.6264319371468e-05	0.000530074171254681	0	105	FFPE-ATAC in FFPE liver
peak_88652	chr9	13883035	13883442	9.49204457768558	6.57380087425629	1.52495029060183	4.31082961508332	1.6264319371468e-05	0.000530074171254681	2	62	FFPE-ATAC in FFPE liver
peak_3716	chr1	135918878	135919346	9.49057503372819	6.57365289413944	1.52492963565245	4.31079096402168	1.62671627571796e-05	0.000530074171254681	0	68.5	FFPE-ATAC in FFPE liver
peak_8675	chr10	67170004	67170222	9.49057503372819	6.57365289413944	1.52492963565245	4.31079096402168	1.62671627571796e-05	0.000530074171254681	0	32.5	FFPE-ATAC in FFPE liver
peak_25520	chr13	108648626	108649624	9.49057503372819	6.57365289413944	1.52492963565245	4.31079096402168	1.62671627571796e-05	0.000530074171254681	0	151.5	FFPE-ATAC in FFPE liver
peak_36971	chr16	91171804	91172153	9.49057503372819	6.57365289413944	1.52492963565245	4.31079096402168	1.62671627571796e-05	0.000530074171254681	0	52	FFPE-ATAC in FFPE liver
peak_43533	chr18	63451961	63452312	9.49057503372819	6.57365289413944	1.52492963565245	4.31079096402168	1.62671627571796e-05	0.000530074171254681	0	52.5	FFPE-ATAC in FFPE liver
peak_52680	chr2	146603955	146604206	9.49057503372819	6.57365289413944	1.52492963565245	4.31079096402168	1.62671627571796e-05	0.000530074171254681	0	37.5	FFPE-ATAC in FFPE liver
peak_63976	chr4	131174662	131174884	9.49057503372819	6.57365289413944	1.52492963565245	4.31079096402168	1.62671627571796e-05	0.000530074171254681	0	33	FFPE-ATAC in FFPE liver
peak_67546	chr5	65415622	65416020	9.49057503372819	6.57365289413944	1.52492963565245	4.31079096402168	1.62671627571796e-05	0.000530074171254681	0	58.5	FFPE-ATAC in FFPE liver
peak_70512	chr5	132476445	132476873	9.49057503372819	6.57365289413944	1.52492963565245	4.31079096402168	1.62671627571796e-05	0.000530074171254681	0	64	FFPE-ATAC in FFPE liver
peak_73782	chr6	64280185	64280408	9.49057503372819	6.57365289413944	1.52492963565245	4.31079096402168	1.62671627571796e-05	0.000530074171254681	0	33.5	FFPE-ATAC in FFPE liver
peak_75027	chr6	95158217	95158880	9.49057503372819	6.57365289413944	1.52492963565245	4.31079096402168	1.62671627571796e-05	0.000530074171254681	0	99	FFPE-ATAC in FFPE liver
peak_76379	chr6	127473727	127473936	9.49057503372819	6.57365289413944	1.52492963565245	4.31079096402168	1.62671627571796e-05	0.000530074171254681	0	31	FFPE-ATAC in FFPE liver
peak_84514	chr8	40459120	40459567	9.49057503372819	6.57365289413944	1.52492963565245	4.31079096402168	1.62671627571796e-05	0.000530074171254681	0	66.5	FFPE-ATAC in FFPE liver
peak_93266	chr9	121341966	121342347	9.49057503372819	6.57365289413944	1.52492963565245	4.31079096402168	1.62671627571796e-05	0.000530074171254681	1	55.5	FFPE-ATAC in FFPE liver
peak_93337	chr9	121977238	121977844	9.49057503372819	6.57365289413944	1.52492963565245	4.31079096402168	1.62671627571796e-05	0.000530074171254681	1	90	FFPE-ATAC in FFPE liver
peak_95320	chrX	133673522	133674077	9.49057503372819	6.57365289413944	1.52492963565245	4.31079096402168	1.62671627571796e-05	0.000530074171254681	0.5	81.5	FFPE-ATAC in FFPE liver
peak_15016	chr11	83308289	83308646	9.49277934966428	6.57387527168665	1.52547681300212	4.30939049066851	1.63705095126101e-05	0.000530074171254681	0	52.5	FFPE-ATAC in FFPE liver
peak_24315	chr13	66833640	66834035	9.49277934966428	6.57387527168665	1.52547681300212	4.30939049066851	1.63705095126101e-05	0.000530074171254681	0	58.5	FFPE-ATAC in FFPE liver
peak_24377	chr13	68738821	68739449	9.49277934966428	6.57387527168665	1.52547681300212	4.30939049066851	1.63705095126101e-05	0.000530074171254681	0	95	FFPE-ATAC in FFPE liver
peak_27619	chr14	47876202	47877057	9.49277934966428	6.57387527168665	1.52547681300212	4.30939049066851	1.63705095126101e-05	0.000530074171254681	0	128	FFPE-ATAC in FFPE liver
peak_30385	chr15	19224360	19224720	9.49277934966428	6.57387527168665	1.52547681300212	4.30939049066851	1.63705095126101e-05	0.000530074171254681	0	53.5	FFPE-ATAC in FFPE liver
peak_34149	chr16	8391904	8392293	9.49277934966428	6.57387527168665	1.52547681300212	4.30939049066851	1.63705095126101e-05	0.000530074171254681	0	57.5	FFPE-ATAC in FFPE liver
peak_39782	chr17	48050703	48050953	9.49277934966428	6.57387527168665	1.52547681300212	4.30939049066851	1.63705095126101e-05	0.000530074171254681	0	37	FFPE-ATAC in FFPE liver
peak_47578	chr2	4416463	4416665	9.49277934966428	6.57387527168665	1.52547681300212	4.30939049066851	1.63705095126101e-05	0.000530074171254681	0.5	30	FFPE-ATAC in FFPE liver
peak_50558	chr2	83877746	83878342	9.49277934966428	6.57387527168665	1.52547681300212	4.30939049066851	1.63705095126101e-05	0.000530074171254681	1	89	FFPE-ATAC in FFPE liver
peak_60154	chr4	25728320	25728608	9.49277934966428	6.57387527168665	1.52547681300212	4.30939049066851	1.63705095126101e-05	0.000530074171254681	0	44	FFPE-ATAC in FFPE liver
peak_61808	chr4	77138908	77139397	9.49277934966428	6.57387527168665	1.52547681300212	4.30939049066851	1.63705095126101e-05	0.000530074171254681	0	72.5	FFPE-ATAC in FFPE liver
peak_65433	chr4	149576678	149576959	9.49277934966428	6.57387527168665	1.52547681300212	4.30939049066851	1.63705095126101e-05	0.000530074171254681	0	42	FFPE-ATAC in FFPE liver
peak_66032	chr5	9844344	9844697	9.49277934966428	6.57387527168665	1.52547681300212	4.30939049066851	1.63705095126101e-05	0.000530074171254681	0	53	FFPE-ATAC in FFPE liver
peak_66073	chr5	14988543	14988773	9.49277934966428	6.57387527168665	1.52547681300212	4.30939049066851	1.63705095126101e-05	0.000530074171254681	0	35	FFPE-ATAC in FFPE liver
peak_66241	chr5	21935468	21935675	9.49277934966428	6.57387527168665	1.52547681300212	4.30939049066851	1.63705095126101e-05	0.000530074171254681	0	31	FFPE-ATAC in FFPE liver
peak_67299	chr5	53309501	53309848	9.49277934966428	6.57387527168665	1.52547681300212	4.30939049066851	1.63705095126101e-05	0.000530074171254681	0	51	FFPE-ATAC in FFPE liver
peak_74464	chr6	86543822	86544324	9.49277934966428	6.57387527168665	1.52547681300212	4.30939049066851	1.63705095126101e-05	0.000530074171254681	0	74.5	FFPE-ATAC in FFPE liver
peak_83272	chr8	4732759	4732965	9.49277934966428	6.57387527168665	1.52547681300212	4.30939049066851	1.63705095126101e-05	0.000530074171254681	0	30.5	FFPE-ATAC in FFPE liver
peak_88696	chr9	14551038	14551508	9.49277934966428	6.57387527168665	1.52547681300212	4.30939049066851	1.63705095126101e-05	0.000530074171254681	0	70	FFPE-ATAC in FFPE liver
peak_91564	chr9	78401311	78401734	9.49277934966428	6.57387527168665	1.52547681300212	4.30939049066851	1.63705095126101e-05	0.000530074171254681	1	63	FFPE-ATAC in FFPE liver
peak_93436	chr9	123684167	123684557	9.49277934966428	6.57387527168665	1.52547681300212	4.30939049066851	1.63705095126101e-05	0.000530074171254681	0	59	FFPE-ATAC in FFPE liver
peak_96066	chrY_random	46996598	46996939	9.49277934966428	6.57387527168665	1.52547681300212	4.30939049066851	1.63705095126101e-05	0.000530074171254681	0	51.5	FFPE-ATAC in FFPE liver
peak_4630	chr1	162340240	162340734	9.48984026174949	6.57357850813731	1.52543538922514	4.30931297029659	1.63762483034188e-05	0.000530074171254681	2	74	FFPE-ATAC in FFPE liver
peak_10571	chr10	101813539	101813878	9.48984026174949	6.57357850813731	1.52543538922514	4.30931297029659	1.63762483034188e-05	0.000530074171254681	0	50	FFPE-ATAC in FFPE liver
peak_14945	chr11	81265096	81265461	9.48984026174949	6.57357850813731	1.52543538922514	4.30931297029659	1.63762483034188e-05	0.000530074171254681	0	54.5	FFPE-ATAC in FFPE liver
peak_18332	chr12	24441090	24441303	9.48984026174949	6.57357850813731	1.52543538922514	4.30931297029659	1.63762483034188e-05	0.000530074171254681	0	32	FFPE-ATAC in FFPE liver
peak_29801	chr14	121455852	121456211	9.48984026174949	6.57357850813731	1.52543538922514	4.30931297029659	1.63762483034188e-05	0.000530074171254681	0	53.5	FFPE-ATAC in FFPE liver
peak_37174	chr16	93706309	93706518	9.48984026174949	6.57357850813731	1.52543538922514	4.30931297029659	1.63762483034188e-05	0.000530074171254681	0	31.5	FFPE-ATAC in FFPE liver
peak_37658	chr17	5890611	5890862	9.48984026174949	6.57357850813731	1.52543538922514	4.30931297029659	1.63762483034188e-05	0.000530074171254681	0	37	FFPE-ATAC in FFPE liver
peak_59339	chr3	149809383	149809738	9.48984026174949	6.57357850813731	1.52543538922514	4.30931297029659	1.63762483034188e-05	0.000530074171254681	0	53	FFPE-ATAC in FFPE liver
peak_59970	chr4	14017481	14017710	9.48984026174949	6.57357850813731	1.52543538922514	4.30931297029659	1.63762483034188e-05	0.000530074171254681	0	34	FFPE-ATAC in FFPE liver
peak_60050	chr4	19417313	19417723	9.48984026174949	6.57357850813731	1.52543538922514	4.30931297029659	1.63762483034188e-05	0.000530074171254681	2	62	FFPE-ATAC in FFPE liver
peak_78020	chr7	20130612	20130851	9.48984026174949	6.57357850813731	1.52543538922514	4.30931297029659	1.63762483034188e-05	0.000530074171254681	0.5	36	FFPE-ATAC in FFPE liver
peak_93476	chrUn_random	2427139	2427394	9.48984026174949	6.57357850813731	1.52543538922514	4.30931297029659	1.63762483034188e-05	0.000530074171254681	0	37.5	FFPE-ATAC in FFPE liver
peak_2075	chr1	82473827	82474667	9.49351412164298	6.57395047174007	1.52635443682834	4.30696194351837	1.65512072289833e-05	0.000532790146362077	1	125.5	FFPE-ATAC in FFPE liver
peak_4590	chr1	160585216	160585565	9.49351412164298	6.57395047174007	1.52635443682834	4.30696194351837	1.65512072289833e-05	0.000532790146362077	0	52.5	FFPE-ATAC in FFPE liver
peak_29526	chr14	110306000	110306590	9.49351412164298	6.57395047174007	1.52635443682834	4.30696194351837	1.65512072289833e-05	0.000532790146362077	0	87.5	FFPE-ATAC in FFPE liver
peak_43197	chr18	55574365	55575164	9.49351412164298	6.57395047174007	1.52635443682834	4.30696194351837	1.65512072289833e-05	0.000532790146362077	0	119.5	FFPE-ATAC in FFPE liver
peak_43241	chr18	56841978	56842429	9.49351412164298	6.57395047174007	1.52635443682834	4.30696194351837	1.65512072289833e-05	0.000532790146362077	2	67	FFPE-ATAC in FFPE liver
peak_47334	chr19	58393312	58393725	9.49351412164298	6.57395047174007	1.52635443682834	4.30696194351837	1.65512072289833e-05	0.000532790146362077	0.5	61.5	FFPE-ATAC in FFPE liver
peak_72689	chr6	33057546	33058036	9.49351412164298	6.57395047174007	1.52635443682834	4.30696194351837	1.65512072289833e-05	0.000532790146362077	0	74.5	FFPE-ATAC in FFPE liver
peak_72803	chr6	35337506	35337907	9.49351412164298	6.57395047174007	1.52635443682834	4.30696194351837	1.65512072289833e-05	0.000532790146362077	0	60	FFPE-ATAC in FFPE liver
peak_80697	chr7	100204617	100205431	9.49351412164298	6.57395047174007	1.52635443682834	4.30696194351837	1.65512072289833e-05	0.000532790146362077	1	123	FFPE-ATAC in FFPE liver
peak_84954	chr8	57975078	57975590	9.49351412164298	6.57395047174007	1.52635443682834	4.30696194351837	1.65512072289833e-05	0.000532790146362077	0	76	FFPE-ATAC in FFPE liver
peak_85286	chr8	71943423	71943953	9.49351412164298	6.57395047174007	1.52635443682834	4.30696194351837	1.65512072289833e-05	0.000532790146362077	0	79	FFPE-ATAC in FFPE liver
peak_88465	chr8_random	710117	710417	9.49351412164298	6.57395047174007	1.52635443682834	4.30696194351837	1.65512072289833e-05	0.000532790146362077	0	45	FFPE-ATAC in FFPE liver
peak_90454	chr9	60040885	60041347	9.49351412164298	6.57395047174007	1.52635443682834	4.30696194351837	1.65512072289833e-05	0.000532790146362077	0	69.5	FFPE-ATAC in FFPE liver
peak_95001	chrX	99471080	99471298	9.49351412164298	6.57395047174007	1.52635443682834	4.30696194351837	1.65512072289833e-05	0.000532790146362077	0	32.5	FFPE-ATAC in FFPE liver
peak_1294	chr1	58933639	58933884	9.4891054897708	6.57350332597211	1.52629202266523	4.30684510457796	1.65599484629199e-05	0.000532790146362077	0	36.5	FFPE-ATAC in FFPE liver
peak_56733	chr3	86957911	86958250	9.4891054897708	6.57350332597211	1.52629202266523	4.30684510457796	1.65599484629199e-05	0.000532790146362077	0	50.5	FFPE-ATAC in FFPE liver
peak_72065	chr6	12951918	12952193	9.4891054897708	6.57350332597211	1.52629202266523	4.30684510457796	1.65599484629199e-05	0.000532790146362077	0	40.5	FFPE-ATAC in FFPE liver
peak_93671	chrUn_random	5813585	5813934	23.0961316033075	6.39675213546911	1.48592531078452	4.30489479453838	1.67065110171441e-05	0.000536786734125571	1	125.5	FFPE-ATAC in FFPE liver
peak_47048	chr19	53980988	53981546	15.1409451513543	3.34720432972799	0.777663801108606	4.30417916451345	1.67605987983587e-05	0.000538344607526694	16.5	121	FFPE-ATAC in FFPE liver
peak_8203	chr10	57687985	57688492	23.099805463201	6.39692150577125	1.48631499972945	4.30388007046667	1.67832539343134e-05	0.000538514641509413	3	182	FFPE-ATAC in FFPE liver
peak_918	chr1	43276644	43277052	9.49424889362168	6.57402686837738	1.52759368623525	4.30351796267177	1.6810721155941e-05	0.000538514641509413	0	60.5	FFPE-ATAC in FFPE liver
peak_24287	chr13	66162753	66163187	9.49424889362168	6.57402686837738	1.52759368623525	4.30351796267177	1.6810721155941e-05	0.000538514641509413	0	65	FFPE-ATAC in FFPE liver
peak_43382	chr18	61193584	61193910	9.49424889362168	6.57402686837738	1.52759368623525	4.30351796267177	1.6810721155941e-05	0.000538514641509413	0	48.5	FFPE-ATAC in FFPE liver
peak_46976	chr19	52794979	52795568	9.49424889362168	6.57402686837738	1.52759368623525	4.30351796267177	1.6810721155941e-05	0.000538514641509413	0	89	FFPE-ATAC in FFPE liver
peak_47149	chr19	55770645	55770845	9.49424889362168	6.57402686837738	1.52759368623525	4.30351796267177	1.6810721155941e-05	0.000538514641509413	0	29.5	FFPE-ATAC in FFPE liver
peak_73854	chr6	69466270	69466644	9.4883707177921	6.57342696107385	1.52750996317896	4.30336110371003	1.68226327844083e-05	0.000538716646400269	2	56	FFPE-ATAC in FFPE liver
peak_65189	chr4	146790643	146790861	9.49498366560037	6.57410477745353	1.52920355063258	4.29903839468201	1.71540756636784e-05	0.000548781950542883	0	33	FFPE-ATAC in FFPE liver
peak_6731	chr10	11072413	11073060	15.230275180261	4.76110672050346	1.1078665715718	4.29754524838544	1.72700014298253e-05	0.000552122979843339	5	148	FFPE-ATAC in FFPE liver
peak_1933	chr1	75457146	75459282	15.2317447242184	4.761208848769	1.10810252432268	4.29672231969625	1.73342111490936e-05	0.000553991473179312	30.5	496	FFPE-ATAC in FFPE liver
peak_78926	chr7	39204677	39204924	15.2288056363036	4.76100425962599	1.10850718765982	4.29496922764837	1.74717569691237e-05	0.000557830826660043	2	57	FFPE-ATAC in FFPE liver
peak_79509	chr7	67005073	67005289	22.8741892823878	6.38258304708321	1.48683535919084	4.2927301988276	1.76489416135073e-05	0.000562553428504571	1	77	FFPE-ATAC in FFPE liver
peak_6278	chr1	194488957	194489436	9.26569362489369	6.53899912784765	1.52546766103735	4.28655375322805	1.81466307625651e-05	0.000563748380944257	1	69	FFPE-ATAC in FFPE liver
peak_8591	chr10	65953220	65953622	9.26569362489369	6.53899912784765	1.52546766103735	4.28655375322805	1.81466307625651e-05	0.000563748380944257	0	58	FFPE-ATAC in FFPE liver
peak_15503	chr11	93875591	93876347	9.26569362489369	6.53899912784765	1.52546766103735	4.28655375322805	1.81466307625651e-05	0.000563748380944257	0	110.5	FFPE-ATAC in FFPE liver
peak_16462	chr11	105383830	105384159	9.26569362489369	6.53899912784765	1.52546766103735	4.28655375322805	1.81466307625651e-05	0.000563748380944257	0	47.5	FFPE-ATAC in FFPE liver
peak_19272	chr12	67175569	67175773	9.26569362489369	6.53899912784765	1.52546766103735	4.28655375322805	1.81466307625651e-05	0.000563748380944257	0	30	FFPE-ATAC in FFPE liver
peak_19304	chr12	70387456	70387886	9.26569362489369	6.53899912784765	1.52546766103735	4.28655375322805	1.81466307625651e-05	0.000563748380944257	1	62	FFPE-ATAC in FFPE liver
peak_20136	chr12	84265731	84266353	9.26569362489369	6.53899912784765	1.52546766103735	4.28655375322805	1.81466307625651e-05	0.000563748380944257	0	90.5	FFPE-ATAC in FFPE liver
peak_24241	chr13	65005612	65005834	9.26569362489369	6.53899912784765	1.52546766103735	4.28655375322805	1.81466307625651e-05	0.000563748380944257	0	32.5	FFPE-ATAC in FFPE liver
peak_29622	chr14	118318834	118319185	9.26569362489369	6.53899912784765	1.52546766103735	4.28655375322805	1.81466307625651e-05	0.000563748380944257	0	51	FFPE-ATAC in FFPE liver
peak_37543	chr17	4536747	4537084	9.26569362489369	6.53899912784765	1.52546766103735	4.28655375322805	1.81466307625651e-05	0.000563748380944257	0	48.5	FFPE-ATAC in FFPE liver
peak_40326	chr17	66287395	66287595	9.26569362489369	6.53899912784765	1.52546766103735	4.28655375322805	1.81466307625651e-05	0.000563748380944257	0	29.5	FFPE-ATAC in FFPE liver
peak_47784	chr2	7480161	7480566	9.26569362489369	6.53899912784765	1.52546766103735	4.28655375322805	1.81466307625651e-05	0.000563748380944257	1	58	FFPE-ATAC in FFPE liver
peak_50626	chr2	84760757	84761095	9.26569362489369	6.53899912784765	1.52546766103735	4.28655375322805	1.81466307625651e-05	0.000563748380944257	0	49.5	FFPE-ATAC in FFPE liver
peak_53241	chr2	157270743	157271444	9.26569362489369	6.53899912784765	1.52546766103735	4.28655375322805	1.81466307625651e-05	0.000563748380944257	2	103.5	FFPE-ATAC in FFPE liver
peak_59187	chr3	145996556	145997107	9.26569362489369	6.53899912784765	1.52546766103735	4.28655375322805	1.81466307625651e-05	0.000563748380944257	1	80	FFPE-ATAC in FFPE liver
peak_60915	chr4	49203848	49204243	9.26569362489369	6.53899912784765	1.52546766103735	4.28655375322805	1.81466307625651e-05	0.000563748380944257	0	57	FFPE-ATAC in FFPE liver
peak_61809	chr4	77207391	77207804	9.26569362489369	6.53899912784765	1.52546766103735	4.28655375322805	1.81466307625651e-05	0.000563748380944257	0	60	FFPE-ATAC in FFPE liver
peak_65021	chr4	141827170	141827507	9.26569362489369	6.53899912784765	1.52546766103735	4.28655375322805	1.81466307625651e-05	0.000563748380944257	0	48.5	FFPE-ATAC in FFPE liver
peak_66619	chr5	31991514	31991907	9.26569362489369	6.53899912784765	1.52546766103735	4.28655375322805	1.81466307625651e-05	0.000563748380944257	1.5	57	FFPE-ATAC in FFPE liver
peak_70536	chr5	133427428	133427801	9.26569362489369	6.53899912784765	1.52546766103735	4.28655375322805	1.81466307625651e-05	0.000563748380944257	0	54.5	FFPE-ATAC in FFPE liver
peak_72039	chr6	11290476	11291355	9.26569362489369	6.53899912784765	1.52546766103735	4.28655375322805	1.81466307625651e-05	0.000563748380944257	0	127	FFPE-ATAC in FFPE liver
peak_75601	chr6	114443659	114443880	9.26569362489369	6.53899912784765	1.52546766103735	4.28655375322805	1.81466307625651e-05	0.000563748380944257	0	32	FFPE-ATAC in FFPE liver
peak_77711	chr7	9013238	9013582	9.26569362489369	6.53899912784765	1.52546766103735	4.28655375322805	1.81466307625651e-05	0.000563748380944257	0	50	FFPE-ATAC in FFPE liver
peak_82634	chr7	142036763	142037254	9.26569362489369	6.53899912784765	1.52546766103735	4.28655375322805	1.81466307625651e-05	0.000563748380944257	1	72	FFPE-ATAC in FFPE liver
peak_85853	chr8	84990831	84991051	9.26569362489369	6.53899912784765	1.52546766103735	4.28655375322805	1.81466307625651e-05	0.000563748380944257	0	32	FFPE-ATAC in FFPE liver
peak_89383	chr9	39550587	39550918	9.26569362489369	6.53899912784765	1.52546766103735	4.28655375322805	1.81466307625651e-05	0.000563748380944257	0	48.5	FFPE-ATAC in FFPE liver
peak_93359	chr9	122124688	122125088	9.26569362489369	6.53899912784765	1.52546766103735	4.28655375322805	1.81466307625651e-05	0.000563748380944257	1	59	FFPE-ATAC in FFPE liver
peak_95965	chrY_random	16473216	16473567	9.26569362489369	6.53899912784765	1.52546766103735	4.28655375322805	1.81466307625651e-05	0.000563748380944257	0	50.5	FFPE-ATAC in FFPE liver
peak_2944	chr1	115343017	115343613	9.26495885291499	6.53892390075498	1.52545805998653	4.28653141785671	1.81484545436012e-05	0.000563748380944257	0.5	87.5	FFPE-ATAC in FFPE liver
peak_16475	chr11	105826272	105826823	9.26495885291499	6.53892390075498	1.52545805998653	4.28653141785671	1.81484545436012e-05	0.000563748380944257	0	79	FFPE-ATAC in FFPE liver
peak_17981	chr12	11874729	11875200	9.26495885291499	6.53892390075498	1.52545805998653	4.28653141785671	1.81484545436012e-05	0.000563748380944257	0	69	FFPE-ATAC in FFPE liver
peak_18751	chr12	36807705	36807991	9.26495885291499	6.53892390075498	1.52545805998653	4.28653141785671	1.81484545436012e-05	0.000563748380944257	0	41	FFPE-ATAC in FFPE liver
peak_18924	chr12	49835455	49835798	9.26495885291499	6.53892390075498	1.52545805998653	4.28653141785671	1.81484545436012e-05	0.000563748380944257	0	51	FFPE-ATAC in FFPE liver
peak_26449	chr14	20110510	20110976	9.26495885291499	6.53892390075498	1.52545805998653	4.28653141785671	1.81484545436012e-05	0.000563748380944257	0	68.5	FFPE-ATAC in FFPE liver
peak_27422	chr14	42737401	42737760	9.26495885291499	6.53892390075498	1.52545805998653	4.28653141785671	1.81484545436012e-05	0.000563748380944257	0	52	FFPE-ATAC in FFPE liver
peak_27850	chr14	53639740	53640089	9.26495885291499	6.53892390075498	1.52545805998653	4.28653141785671	1.81484545436012e-05	0.000563748380944257	0	51.5	FFPE-ATAC in FFPE liver
peak_28765	chr14	70983249	70983555	9.26495885291499	6.53892390075498	1.52545805998653	4.28653141785671	1.81484545436012e-05	0.000563748380944257	0	44.5	FFPE-ATAC in FFPE liver
peak_33256	chr15	94861554	94861912	9.26495885291499	6.53892390075498	1.52545805998653	4.28653141785671	1.81484545436012e-05	0.000563748380944257	0	51.5	FFPE-ATAC in FFPE liver
peak_42164	chr18	24788746	24789091	9.26495885291499	6.53892390075498	1.52545805998653	4.28653141785671	1.81484545436012e-05	0.000563748380944257	0	50	FFPE-ATAC in FFPE liver
peak_43206	chr18	56302229	56302651	9.26495885291499	6.53892390075498	1.52545805998653	4.28653141785671	1.81484545436012e-05	0.000563748380944257	0	61.5	FFPE-ATAC in FFPE liver
peak_64677	chr4	138216787	138217356	9.26495885291499	6.53892390075498	1.52545805998653	4.28653141785671	1.81484545436012e-05	0.000563748380944257	0	83	FFPE-ATAC in FFPE liver
peak_67183	chr5	47857813	47858166	9.26495885291499	6.53892390075498	1.52545805998653	4.28653141785671	1.81484545436012e-05	0.000563748380944257	0	50.5	FFPE-ATAC in FFPE liver
peak_70678	chr5	135728503	135728841	9.26495885291499	6.53892390075498	1.52545805998653	4.28653141785671	1.81484545436012e-05	0.000563748380944257	0	49.5	FFPE-ATAC in FFPE liver
peak_77591	chr7	4624206	4624633	9.26495885291499	6.53892390075498	1.52545805998653	4.28653141785671	1.81484545436012e-05	0.000563748380944257	0	61	FFPE-ATAC in FFPE liver
peak_79254	chr7	53487560	53487979	9.26495885291499	6.53892390075498	1.52545805998653	4.28653141785671	1.81484545436012e-05	0.000563748380944257	0	60.5	FFPE-ATAC in FFPE liver
peak_84521	chr8	40833844	40834197	9.26495885291499	6.53892390075498	1.52545805998653	4.28653141785671	1.81484545436012e-05	0.000563748380944257	0	51.5	FFPE-ATAC in FFPE liver
peak_85127	chr8	65325215	65325424	9.26495885291499	6.53892390075498	1.52545805998653	4.28653141785671	1.81484545436012e-05	0.000563748380944257	0	30	FFPE-ATAC in FFPE liver
peak_90460	chr9	60386848	60387981	9.26495885291499	6.53892390075498	1.52545805998653	4.28653141785671	1.81484545436012e-05	0.000563748380944257	0	166.5	FFPE-ATAC in FFPE liver
peak_93483	chrUn_random	2518564	2519054	9.26495885291499	6.53892390075498	1.52545805998653	4.28653141785671	1.81484545436012e-05	0.000563748380944257	0	71	FFPE-ATAC in FFPE liver
peak_96045	chrY_random	40783998	40784208	9.26495885291499	6.53892390075498	1.52545805998653	4.28653141785671	1.81484545436012e-05	0.000563748380944257	0	30.5	FFPE-ATAC in FFPE liver
peak_1678	chr1	71897037	71897451	9.26642839687239	6.53907457219757	1.52583262499783	4.28557789699043	1.82264767614111e-05	0.000563748380944257	1	60.5	FFPE-ATAC in FFPE liver
peak_6675	chr10	8867923	8868267	9.26642839687239	6.53907457219757	1.52583262499783	4.28557789699043	1.82264767614111e-05	0.000563748380944257	0	50	FFPE-ATAC in FFPE liver
peak_20471	chr12	89767867	89768807	9.26642839687239	6.53907457219757	1.52583262499783	4.28557789699043	1.82264767614111e-05	0.000563748380944257	1	136.5	FFPE-ATAC in FFPE liver
peak_22057	chr13	13960756	13960980	9.26642839687239	6.53907457219757	1.52583262499783	4.28557789699043	1.82264767614111e-05	0.000563748380944257	0	32.5	FFPE-ATAC in FFPE liver
peak_22354	chr13	24196608	24197074	9.26642839687239	6.53907457219757	1.52583262499783	4.28557789699043	1.82264767614111e-05	0.000563748380944257	1	68.5	FFPE-ATAC in FFPE liver
peak_27419	chr14	42564080	42564429	9.26642839687239	6.53907457219757	1.52583262499783	4.28557789699043	1.82264767614111e-05	0.000563748380944257	0	50.5	FFPE-ATAC in FFPE liver
peak_29045	chr14	77553542	77553935	9.26642839687239	6.53907457219757	1.52583262499783	4.28557789699043	1.82264767614111e-05	0.000563748380944257	0	57	FFPE-ATAC in FFPE liver
peak_30892	chr15	37911460	37911837	9.26642839687239	6.53907457219757	1.52583262499783	4.28557789699043	1.82264767614111e-05	0.000563748380944257	2	55	FFPE-ATAC in FFPE liver
peak_35219	chr16	30547696	30547922	9.26642839687239	6.53907457219757	1.52583262499783	4.28557789699043	1.82264767614111e-05	0.000563748380944257	0	33	FFPE-ATAC in FFPE liver
peak_42314	chr18	32722759	32723033	9.26642839687239	6.53907457219757	1.52583262499783	4.28557789699043	1.82264767614111e-05	0.000563748380944257	0	40	FFPE-ATAC in FFPE liver
peak_51213	chr2	105014843	105015301	9.26642839687239	6.53907457219757	1.52583262499783	4.28557789699043	1.82264767614111e-05	0.000563748380944257	1.5	67.5	FFPE-ATAC in FFPE liver
peak_51971	chr2	127339670	127339933	9.26642839687239	6.53907457219757	1.52583262499783	4.28557789699043	1.82264767614111e-05	0.000563748380944257	0	38	FFPE-ATAC in FFPE liver
peak_53634	chr2	164691982	164692331	9.26642839687239	6.53907457219757	1.52583262499783	4.28557789699043	1.82264767614111e-05	0.000563748380944257	0	50.5	FFPE-ATAC in FFPE liver
peak_54442	chr2	179542013	179542390	9.26642839687239	6.53907457219757	1.52583262499783	4.28557789699043	1.82264767614111e-05	0.000563748380944257	1	55	FFPE-ATAC in FFPE liver
peak_56294	chr3	69918289	69918693	9.26642839687239	6.53907457219757	1.52583262499783	4.28557789699043	1.82264767614111e-05	0.000563748380944257	0	58.5	FFPE-ATAC in FFPE liver
peak_57448	chr3	98747889	98748624	9.26642839687239	6.53907457219757	1.52583262499783	4.28557789699043	1.82264767614111e-05	0.000563748380944257	1	109.5	FFPE-ATAC in FFPE liver
peak_59813	chr4	9134826	9135062	9.26642839687239	6.53907457219757	1.52583262499783	4.28557789699043	1.82264767614111e-05	0.000563748380944257	0	34.5	FFPE-ATAC in FFPE liver
peak_61425	chr4	60898530	60899128	9.26642839687239	6.53907457219757	1.52583262499783	4.28557789699043	1.82264767614111e-05	0.000563748380944257	0	86.5	FFPE-ATAC in FFPE liver
peak_61926	chr4	82500070	82500473	9.26642839687239	6.53907457219757	1.52583262499783	4.28557789699043	1.82264767614111e-05	0.000563748380944257	0	57.5	FFPE-ATAC in FFPE liver
peak_71796	chr5	151923127	151923516	9.26642839687239	6.53907457219757	1.52583262499783	4.28557789699043	1.82264767614111e-05	0.000563748380944257	2	57	FFPE-ATAC in FFPE liver
peak_74327	chr6	84325020	84325453	9.26642839687239	6.53907457219757	1.52583262499783	4.28557789699043	1.82264767614111e-05	0.000563748380944257	0	64	FFPE-ATAC in FFPE liver
peak_78993	chr7	48332111	48332558	9.26642839687239	6.53907457219757	1.52583262499783	4.28557789699043	1.82264767614111e-05	0.000563748380944257	1	65	FFPE-ATAC in FFPE liver
peak_87437	chr8	119140487	119141191	9.26642839687239	6.53907457219757	1.52583262499783	4.28557789699043	1.82264767614111e-05	0.000563748380944257	1	102	FFPE-ATAC in FFPE liver
peak_94724	chrX	78039110	78039334	9.26642839687239	6.53907457219757	1.52583262499783	4.28557789699043	1.82264767614111e-05	0.000563748380944257	0	32.5	FFPE-ATAC in FFPE liver
peak_95949	chrY_random	11983295	11983501	9.26642839687239	6.53907457219757	1.52583262499783	4.28557789699043	1.82264767614111e-05	0.000563748380944257	0	30	FFPE-ATAC in FFPE liver
peak_27926	chr14	55393141	55393477	9.2642240809363	6.53884846326954	1.5258037677393	4.28551075932771	1.82319823518215e-05	0.000563748380944257	0	49.5	FFPE-ATAC in FFPE liver
peak_44364	chr18	83927718	83928104	9.2642240809363	6.53884846326954	1.5258037677393	4.28551075932771	1.82319823518215e-05	0.000563748380944257	0.5	57	FFPE-ATAC in FFPE liver
peak_44437	chr18	85417648	85418155	9.2642240809363	6.53884846326954	1.5258037677393	4.28551075932771	1.82319823518215e-05	0.000563748380944257	0	74.5	FFPE-ATAC in FFPE liver
peak_47489	chr1_random	620966	621219	9.2642240809363	6.53884846326954	1.5258037677393	4.28551075932771	1.82319823518215e-05	0.000563748380944257	0	36.5	FFPE-ATAC in FFPE liver
peak_61644	chr4	63956864	63957089	9.2642240809363	6.53884846326954	1.5258037677393	4.28551075932771	1.82319823518215e-05	0.000563748380944257	0	32.5	FFPE-ATAC in FFPE liver
peak_76391	chr6	127890338	127890736	9.2642240809363	6.53884846326954	1.5258037677393	4.28551075932771	1.82319823518215e-05	0.000563748380944257	0	58	FFPE-ATAC in FFPE liver
peak_76869	chr6	137760165	137760431	9.2642240809363	6.53884846326954	1.5258037677393	4.28551075932771	1.82319823518215e-05	0.000563748380944257	0	38.5	FFPE-ATAC in FFPE liver
peak_81560	chr7	120636833	120637051	9.2642240809363	6.53884846326954	1.5258037677393	4.28551075932771	1.82319823518215e-05	0.000563748380944257	0	31.5	FFPE-ATAC in FFPE liver
peak_88439	chr8_random	66988	67246	9.2642240809363	6.53884846326954	1.5258037677393	4.28551075932771	1.82319823518215e-05	0.000563748380944257	0	37.5	FFPE-ATAC in FFPE liver
peak_90405	chr9	58659713	58660078	9.2642240809363	6.53884846326954	1.5258037677393	4.28551075932771	1.82319823518215e-05	0.000563748380944257	0	53.5	FFPE-ATAC in FFPE liver
peak_96059	chrY_random	44928791	44929134	9.2642240809363	6.53884846326954	1.5258037677393	4.28551075932771	1.82319823518215e-05	0.000563748380944257	0	50	FFPE-ATAC in FFPE liver
peak_2701	chr1	96366376	96366746	9.26716316885108	6.53915065922552	1.5265575298443	4.2835926792045	1.83899444151202e-05	0.000563840378931349	0	55	FFPE-ATAC in FFPE liver
peak_5924	chr1	188644938	188645441	9.26716316885108	6.53915065922552	1.5265575298443	4.2835926792045	1.83899444151202e-05	0.000563840378931349	1	74	FFPE-ATAC in FFPE liver
peak_8112	chr10	53284685	53284896	9.26716316885108	6.53915065922552	1.5265575298443	4.2835926792045	1.83899444151202e-05	0.000563840378931349	0	31	FFPE-ATAC in FFPE liver
peak_18866	chr12	42707984	42708435	9.26716316885108	6.53915065922552	1.5265575298443	4.2835926792045	1.83899444151202e-05	0.000563840378931349	1	67	FFPE-ATAC in FFPE liver
peak_30376	chr15	17214121	17214332	9.26716316885108	6.53915065922552	1.5265575298443	4.2835926792045	1.83899444151202e-05	0.000563840378931349	0	30.5	FFPE-ATAC in FFPE liver
peak_31411	chr15	58534376	58534602	9.26716316885108	6.53915065922552	1.5265575298443	4.2835926792045	1.83899444151202e-05	0.000563840378931349	0	33	FFPE-ATAC in FFPE liver
peak_33117	chr15	89804652	89805022	9.26716316885108	6.53915065922552	1.5265575298443	4.2835926792045	1.83899444151202e-05	0.000563840378931349	0	53.5	FFPE-ATAC in FFPE liver
peak_47938	chr2	11990688	11991421	9.26716316885108	6.53915065922552	1.5265575298443	4.2835926792045	1.83899444151202e-05	0.000563840378931349	0	106.5	FFPE-ATAC in FFPE liver
peak_50990	chr2	101720579	101720797	9.26716316885108	6.53915065922552	1.5265575298443	4.2835926792045	1.83899444151202e-05	0.000563840378931349	0	32.5	FFPE-ATAC in FFPE liver
peak_52327	chr2	133538768	133539149	9.26716316885108	6.53915065922552	1.5265575298443	4.2835926792045	1.83899444151202e-05	0.000563840378931349	1	55.5	FFPE-ATAC in FFPE liver
peak_52506	chr2	143447862	143448427	9.26716316885108	6.53915065922552	1.5265575298443	4.2835926792045	1.83899444151202e-05	0.000563840378931349	1	82.5	FFPE-ATAC in FFPE liver
peak_54772	chr3	11084276	11084525	9.26716316885108	6.53915065922552	1.5265575298443	4.2835926792045	1.83899444151202e-05	0.000563840378931349	0	36	FFPE-ATAC in FFPE liver
peak_73695	chr6	57574423	57574642	9.26716316885108	6.53915065922552	1.5265575298443	4.2835926792045	1.83899444151202e-05	0.000563840378931349	0	32.5	FFPE-ATAC in FFPE liver
peak_75604	chr6	114516087	114516379	9.26716316885108	6.53915065922552	1.5265575298443	4.2835926792045	1.83899444151202e-05	0.000563840378931349	0	42.5	FFPE-ATAC in FFPE liver
peak_84049	chr8	27284942	27285480	9.26716316885108	6.53915065922552	1.5265575298443	4.2835926792045	1.83899444151202e-05	0.000563840378931349	0	77.5	FFPE-ATAC in FFPE liver
peak_85796	chr8	83108522	83109065	9.26716316885108	6.53915065922552	1.5265575298443	4.2835926792045	1.83899444151202e-05	0.000563840378931349	2	78	FFPE-ATAC in FFPE liver
peak_86803	chr8	108116668	108117251	9.26716316885108	6.53915065922552	1.5265575298443	4.2835926792045	1.83899444151202e-05	0.000563840378931349	2	85.5	FFPE-ATAC in FFPE liver
peak_88517	chr9	5522827	5523044	9.26716316885108	6.53915065922552	1.5265575298443	4.2835926792045	1.83899444151202e-05	0.000563840378931349	0	31.5	FFPE-ATAC in FFPE liver
peak_90985	chr9	66905776	66906281	9.26716316885108	6.53915065922552	1.5265575298443	4.2835926792045	1.83899444151202e-05	0.000563840378931349	0	73	FFPE-ATAC in FFPE liver
peak_8930	chr10	71852370	71852785	9.2634893089576	6.53877238944877	1.52650925743833	4.28348033763099	1.83992365229518e-05	0.000563840378931349	0	60	FFPE-ATAC in FFPE liver
peak_29519	chr14	108978027	108978236	9.2634893089576	6.53877238944877	1.52650925743833	4.28348033763099	1.83992365229518e-05	0.000563840378931349	0	30.5	FFPE-ATAC in FFPE liver
peak_29637	chr14	118477167	118477535	9.2634893089576	6.53877238944877	1.52650925743833	4.28348033763099	1.83992365229518e-05	0.000563840378931349	1	53	FFPE-ATAC in FFPE liver
peak_32087	chr15	75934563	75934843	9.2634893089576	6.53877238944877	1.52650925743833	4.28348033763099	1.83992365229518e-05	0.000563840378931349	0	40	FFPE-ATAC in FFPE liver
peak_42780	chr18	40741953	40742267	9.26789794082978	6.53922780917456	1.52765155304241	4.28057549913873	1.86410632693324e-05	0.0005699788298789	0	45.5	FFPE-ATAC in FFPE liver
peak_75332	chr6	105639267	105639618	9.26789794082978	6.53922780917456	1.52765155304241	4.28057549913873	1.86410632693324e-05	0.0005699788298789	0	51	FFPE-ATAC in FFPE liver
peak_76739	chr6	136278088	136278289	9.26789794082978	6.53922780917456	1.52765155304241	4.28057549913873	1.86410632693324e-05	0.0005699788298789	0	29.5	FFPE-ATAC in FFPE liver
peak_90475	chr9	60725566	60725986	9.26789794082978	6.53922780917456	1.52765155304241	4.28057549913873	1.86410632693324e-05	0.0005699788298789	0	62	FFPE-ATAC in FFPE liver
peak_49636	chr2	57067036	57067488	9.2627545369789	6.5386952595972	1.52758361102145	4.28041726319972	1.86543229315926e-05	0.0005700215397049	0	65.5	FFPE-ATAC in FFPE liver
peak_90612	chr9	62340583	62340918	9.2627545369789	6.5386952595972	1.52758361102145	4.28041726319972	1.86543229315926e-05	0.0005700215397049	0	49	FFPE-ATAC in FFPE liver
peak_33938	chr16	3236009	3236269	22.6459663411799	6.36847366277775	1.48831326316462	4.27898737476571	1.87745510751339e-05	0.000573041023423742	1	91	FFPE-ATAC in FFPE liver
peak_9780	chr10	85422609	85422884	9.26863271280848	6.53930640590595	1.5291286621535	4.276491944567	1.89861423647082e-05	0.000578688948155149	0	40.5	FFPE-ATAC in FFPE liver
peak_15368	chr11	88694147	88694371	9.26863271280848	6.53930640590595	1.5291286621535	4.276491944567	1.89861423647082e-05	0.000578688948155149	0	33	FFPE-ATAC in FFPE liver
peak_52048	chr2	128567172	128567443	9.26863271280848	6.53930640590595	1.5291286621535	4.276491944567	1.89861423647082e-05	0.000578688948155149	0	39.5	FFPE-ATAC in FFPE liver
peak_54497	chr2	180486666	180487043	9.26863271280848	6.53930640590595	1.5291286621535	4.276491944567	1.89861423647082e-05	0.000578688948155149	1	55.5	FFPE-ATAC in FFPE liver
peak_8205	chr10	57694024	57694400	22.4207526048253	6.35336813530735	1.48714020436187	4.27220521419065	1.93549329014361e-05	0.000588436495315978	2	131	FFPE-ATAC in FFPE liver
peak_20429	chr12	88418538	88418753	9.26128499302151	6.53853623949629	1.53090780859651	4.27101893581077	1.94581883861995e-05	0.000591388621217755	0	31.5	FFPE-ATAC in FFPE liver
peak_66103	chr5	15197815	15198052	15.0068633153839	4.73892024153395	1.10987121160604	4.26979292009611	1.95654538299749e-05	0.000594460715766123	2	54	FFPE-ATAC in FFPE liver
peak_28973	chr14	76240033	76240240	14.9167985144985	3.32348744935514	0.779797706320242	4.26198669529079	2.02617509129173e-05	0.00059592467179106	6	44	FFPE-ATAC in FFPE liver
peak_20494	chr12	92511246	92511806	9.0393426721018	6.50333765203798	1.52638674310326	4.26060936484301	2.03870291648208e-05	0.00059592467179106	1	79	FFPE-ATAC in FFPE liver
peak_26997	chr14	31278314	31279320	9.0393426721018	6.50333765203798	1.52638674310326	4.26060936484301	2.03870291648208e-05	0.00059592467179106	0	143	FFPE-ATAC in FFPE liver
peak_34878	chr16	23727136	23727621	9.0393426721018	6.50333765203798	1.52638674310326	4.26060936484301	2.03870291648208e-05	0.00059592467179106	0	68.5	FFPE-ATAC in FFPE liver
peak_35670	chr16	36323290	36323729	9.0393426721018	6.50333765203798	1.52638674310326	4.26060936484301	2.03870291648208e-05	0.00059592467179106	0	62.5	FFPE-ATAC in FFPE liver
peak_36675	chr16	82560958	82561513	9.0393426721018	6.50333765203798	1.52638674310326	4.26060936484301	2.03870291648208e-05	0.00059592467179106	0	80	FFPE-ATAC in FFPE liver
peak_36748	chr16	85572181	85572598	9.0393426721018	6.50333765203798	1.52638674310326	4.26060936484301	2.03870291648208e-05	0.00059592467179106	1	59.5	FFPE-ATAC in FFPE liver
peak_36881	chr16	89132115	89132496	9.0393426721018	6.50333765203798	1.52638674310326	4.26060936484301	2.03870291648208e-05	0.00059592467179106	0	53.5	FFPE-ATAC in FFPE liver
peak_41856	chr18	12457054	12457259	9.0393426721018	6.50333765203798	1.52638674310326	4.26060936484301	2.03870291648208e-05	0.00059592467179106	0.5	29.5	FFPE-ATAC in FFPE liver
peak_43791	chr18	67996416	67996795	9.0393426721018	6.50333765203798	1.52638674310326	4.26060936484301	2.03870291648208e-05	0.00059592467179106	0	54.5	FFPE-ATAC in FFPE liver
peak_45608	chr19	27643385	27643730	9.0393426721018	6.50333765203798	1.52638674310326	4.26060936484301	2.03870291648208e-05	0.00059592467179106	0	49.5	FFPE-ATAC in FFPE liver
peak_46000	chr19	35963233	35964348	9.0393426721018	6.50333765203798	1.52638674310326	4.26060936484301	2.03870291648208e-05	0.00059592467179106	0	158.5	FFPE-ATAC in FFPE liver
peak_46955	chr19	49929389	49929602	9.0393426721018	6.50333765203798	1.52638674310326	4.26060936484301	2.03870291648208e-05	0.00059592467179106	0	30	FFPE-ATAC in FFPE liver
peak_46967	chr19	51934452	51934726	9.0393426721018	6.50333765203798	1.52638674310326	4.26060936484301	2.03870291648208e-05	0.00059592467179106	0.5	39	FFPE-ATAC in FFPE liver
peak_55010	chr3	25745536	25746288	9.0393426721018	6.50333765203798	1.52638674310326	4.26060936484301	2.03870291648208e-05	0.00059592467179106	0	107.5	FFPE-ATAC in FFPE liver
peak_59478	chr3	153367840	153368545	9.0393426721018	6.50333765203798	1.52638674310326	4.26060936484301	2.03870291648208e-05	0.00059592467179106	2	99	FFPE-ATAC in FFPE liver
peak_59649	chr4	5346810	5347162	9.0393426721018	6.50333765203798	1.52638674310326	4.26060936484301	2.03870291648208e-05	0.00059592467179106	0	50.5	FFPE-ATAC in FFPE liver
peak_61427	chr4	60908502	60909071	9.0393426721018	6.50333765203798	1.52638674310326	4.26060936484301	2.03870291648208e-05	0.00059592467179106	0	80	FFPE-ATAC in FFPE liver
peak_64778	chr4	139276966	139277324	9.0393426721018	6.50333765203798	1.52638674310326	4.26060936484301	2.03870291648208e-05	0.00059592467179106	0	51.5	FFPE-ATAC in FFPE liver
peak_66055	chr5	13914600	13914967	9.0393426721018	6.50333765203798	1.52638674310326	4.26060936484301	2.03870291648208e-05	0.00059592467179106	0	52.5	FFPE-ATAC in FFPE liver
peak_72133	chr6	16852920	16853126	9.0393426721018	6.50333765203798	1.52638674310326	4.26060936484301	2.03870291648208e-05	0.00059592467179106	0	29	FFPE-ATAC in FFPE liver
peak_75844	chr6	118306911	118307286	9.0393426721018	6.50333765203798	1.52638674310326	4.26060936484301	2.03870291648208e-05	0.00059592467179106	0	52.5	FFPE-ATAC in FFPE liver
peak_76377	chr6	127418449	127419055	9.0393426721018	6.50333765203798	1.52638674310326	4.26060936484301	2.03870291648208e-05	0.00059592467179106	0	86.5	FFPE-ATAC in FFPE liver
peak_79251	chr7	53397102	53397620	9.0393426721018	6.50333765203798	1.52638674310326	4.26060936484301	2.03870291648208e-05	0.00059592467179106	0	74	FFPE-ATAC in FFPE liver
peak_83666	chr8	16343988	16344373	9.0393426721018	6.50333765203798	1.52638674310326	4.26060936484301	2.03870291648208e-05	0.00059592467179106	0	55	FFPE-ATAC in FFPE liver
peak_88166	chr8	127657594	127658284	9.0393426721018	6.50333765203798	1.52638674310326	4.26060936484301	2.03870291648208e-05	0.00059592467179106	0	98.5	FFPE-ATAC in FFPE liver
peak_91030	chr9	68559827	68560231	9.0393426721018	6.50333765203798	1.52638674310326	4.26060936484301	2.03870291648208e-05	0.00059592467179106	0	57.5	FFPE-ATAC in FFPE liver
peak_92424	chr9	106439782	106440443	9.0393426721018	6.50333765203798	1.52638674310326	4.26060936484301	2.03870291648208e-05	0.00059592467179106	0	95.5	FFPE-ATAC in FFPE liver
peak_94869	chrX	95290256	95290705	9.0393426721018	6.50333765203798	1.52638674310326	4.26060936484301	2.03870291648208e-05	0.00059592467179106	1	62.5	FFPE-ATAC in FFPE liver
peak_95970	chrY_random	17187908	17188120	9.0393426721018	6.50333765203798	1.52638674310326	4.26060936484301	2.03870291648208e-05	0.00059592467179106	0	29.5	FFPE-ATAC in FFPE liver
peak_96031	chrY_random	34910740	34910970	9.0393426721018	6.50333765203798	1.52638674310326	4.26060936484301	2.03870291648208e-05	0.00059592467179106	0	32.5	FFPE-ATAC in FFPE liver
peak_2367	chr1	90043940	90044307	9.0400774440805	6.50341439289788	1.5265796344722	4.26012128423709	2.04316003828739e-05	0.00059592467179106	1	51.5	FFPE-ATAC in FFPE liver
peak_2713	chr1	97348378	97348921	9.0400774440805	6.50341439289788	1.5265796344722	4.26012128423709	2.04316003828739e-05	0.00059592467179106	0	77.5	FFPE-ATAC in FFPE liver
peak_8567	chr10	62970003	62970328	9.0400774440805	6.50341439289788	1.5265796344722	4.26012128423709	2.04316003828739e-05	0.00059592467179106	0	45.5	FFPE-ATAC in FFPE liver
peak_8926	chr10	70985884	70986148	9.0400774440805	6.50341439289788	1.5265796344722	4.26012128423709	2.04316003828739e-05	0.00059592467179106	0	37	FFPE-ATAC in FFPE liver
peak_10673	chr10	107666697	107666945	9.0400774440805	6.50341439289788	1.5265796344722	4.26012128423709	2.04316003828739e-05	0.00059592467179106	0	34.5	FFPE-ATAC in FFPE liver
peak_11069	chr10	117946794	117947153	9.0400774440805	6.50341439289788	1.5265796344722	4.26012128423709	2.04316003828739e-05	0.00059592467179106	0	51	FFPE-ATAC in FFPE liver
peak_12021	chr11	6728492	6728898	9.0400774440805	6.50341439289788	1.5265796344722	4.26012128423709	2.04316003828739e-05	0.00059592467179106	0	57.5	FFPE-ATAC in FFPE liver
peak_13019	chr11	47701418	47702185	9.0400774440805	6.50341439289788	1.5265796344722	4.26012128423709	2.04316003828739e-05	0.00059592467179106	1	108.5	FFPE-ATAC in FFPE liver
peak_17955	chr12	9450206	9451972	9.0400774440805	6.50341439289788	1.5265796344722	4.26012128423709	2.04316003828739e-05	0.00059592467179106	0	254	FFPE-ATAC in FFPE liver
peak_19020	chr12	54029962	54030428	9.0400774440805	6.50341439289788	1.5265796344722	4.26012128423709	2.04316003828739e-05	0.00059592467179106	0	65.5	FFPE-ATAC in FFPE liver
peak_19686	chr12	77290394	77291368	9.0400774440805	6.50341439289788	1.5265796344722	4.26012128423709	2.04316003828739e-05	0.00059592467179106	0	140	FFPE-ATAC in FFPE liver
peak_23455	chr13	48663753	48664159	9.0400774440805	6.50341439289788	1.5265796344722	4.26012128423709	2.04316003828739e-05	0.00059592467179106	1.5	58	FFPE-ATAC in FFPE liver
peak_25459	chr13	107290398	107290905	9.0400774440805	6.50341439289788	1.5265796344722	4.26012128423709	2.04316003828739e-05	0.00059592467179106	1	71	FFPE-ATAC in FFPE liver
peak_26306	chr14	14121545	14121896	9.0400774440805	6.50341439289788	1.5265796344722	4.26012128423709	2.04316003828739e-05	0.00059592467179106	0	50.5	FFPE-ATAC in FFPE liver
peak_29061	chr14	78703471	78703987	9.0400774440805	6.50341439289788	1.5265796344722	4.26012128423709	2.04316003828739e-05	0.00059592467179106	1	74	FFPE-ATAC in FFPE liver
peak_29266	chr14	99469574	99470264	9.0400774440805	6.50341439289788	1.5265796344722	4.26012128423709	2.04316003828739e-05	0.00059592467179106	1	97	FFPE-ATAC in FFPE liver
peak_30401	chr15	21056422	21056755	9.0400774440805	6.50341439289788	1.5265796344722	4.26012128423709	2.04316003828739e-05	0.00059592467179106	0	48	FFPE-ATAC in FFPE liver
peak_33039	chr15	88637179	88637526	9.0400774440805	6.50341439289788	1.5265796344722	4.26012128423709	2.04316003828739e-05	0.00059592467179106	0	49.5	FFPE-ATAC in FFPE liver
peak_35677	chr16	36659506	36659921	9.0400774440805	6.50341439289788	1.5265796344722	4.26012128423709	2.04316003828739e-05	0.00059592467179106	1	58	FFPE-ATAC in FFPE liver
peak_38146	chr17	20784058	20784423	9.0400774440805	6.50341439289788	1.5265796344722	4.26012128423709	2.04316003828739e-05	0.00059592467179106	0	51.5	FFPE-ATAC in FFPE liver
peak_41931	chr18	13455788	13456560	9.0400774440805	6.50341439289788	1.5265796344722	4.26012128423709	2.04316003828739e-05	0.00059592467179106	0	110	FFPE-ATAC in FFPE liver
peak_50126	chr2	70619872	70620221	9.0400774440805	6.50341439289788	1.5265796344722	4.26012128423709	2.04316003828739e-05	0.00059592467179106	0.5	49.5	FFPE-ATAC in FFPE liver
peak_52044	chr2	128556310	128556660	9.0400774440805	6.50341439289788	1.5265796344722	4.26012128423709	2.04316003828739e-05	0.00059592467179106	0	50	FFPE-ATAC in FFPE liver
peak_53182	chr2	156233632	156233973	9.0400774440805	6.50341439289788	1.5265796344722	4.26012128423709	2.04316003828739e-05	0.00059592467179106	0	48	FFPE-ATAC in FFPE liver
peak_55984	chr3	59723927	59724134	9.0400774440805	6.50341439289788	1.5265796344722	4.26012128423709	2.04316003828739e-05	0.00059592467179106	0.5	29.5	FFPE-ATAC in FFPE liver
peak_61416	chr4	60745491	60746249	9.0400774440805	6.50341439289788	1.5265796344722	4.26012128423709	2.04316003828739e-05	0.00059592467179106	0	108	FFPE-ATAC in FFPE liver
peak_63440	chr4	121870751	121871084	9.0400774440805	6.50341439289788	1.5265796344722	4.26012128423709	2.04316003828739e-05	0.00059592467179106	0	47	FFPE-ATAC in FFPE liver
peak_67003	chr5	39830093	39830456	9.0400774440805	6.50341439289788	1.5265796344722	4.26012128423709	2.04316003828739e-05	0.00059592467179106	0	51	FFPE-ATAC in FFPE liver
peak_67787	chr5	72976002	72976421	9.0400774440805	6.50341439289788	1.5265796344722	4.26012128423709	2.04316003828739e-05	0.00059592467179106	0	59	FFPE-ATAC in FFPE liver
peak_68986	chr5	106797472	106797854	9.0400774440805	6.50341439289788	1.5265796344722	4.26012128423709	2.04316003828739e-05	0.00059592467179106	0	54.5	FFPE-ATAC in FFPE liver
peak_72290	chr6	22889646	22889852	9.0400774440805	6.50341439289788	1.5265796344722	4.26012128423709	2.04316003828739e-05	0.00059592467179106	0	29.5	FFPE-ATAC in FFPE liver
peak_73280	chr6	49923709	49924216	9.0400774440805	6.50341439289788	1.5265796344722	4.26012128423709	2.04316003828739e-05	0.00059592467179106	2	73	FFPE-ATAC in FFPE liver
peak_75260	chr6	100520864	100521661	9.0400774440805	6.50341439289788	1.5265796344722	4.26012128423709	2.04316003828739e-05	0.00059592467179106	1	113.5	FFPE-ATAC in FFPE liver
peak_77358	chr6	145968187	145968579	9.0400774440805	6.50341439289788	1.5265796344722	4.26012128423709	2.04316003828739e-05	0.00059592467179106	0	55.5	FFPE-ATAC in FFPE liver
peak_80126	chr7	84196215	84196758	9.0400774440805	6.50341439289788	1.5265796344722	4.26012128423709	2.04316003828739e-05	0.00059592467179106	0	76.5	FFPE-ATAC in FFPE liver
peak_80523	chr7	91378281	91378814	9.0400774440805	6.50341439289788	1.5265796344722	4.26012128423709	2.04316003828739e-05	0.00059592467179106	0	75	FFPE-ATAC in FFPE liver
peak_81768	chr7	125617956	125618351	9.0400774440805	6.50341439289788	1.5265796344722	4.26012128423709	2.04316003828739e-05	0.00059592467179106	0	55.5	FFPE-ATAC in FFPE liver
peak_82462	chr7	138945802	138946381	9.0400774440805	6.50341439289788	1.5265796344722	4.26012128423709	2.04316003828739e-05	0.00059592467179106	1	82.5	FFPE-ATAC in FFPE liver
peak_83517	chr8	12633275	12633592	9.0400774440805	6.50341439289788	1.5265796344722	4.26012128423709	2.04316003828739e-05	0.00059592467179106	0	45	FFPE-ATAC in FFPE liver
peak_84694	chr8	46551088	46551327	9.0400774440805	6.50341439289788	1.5265796344722	4.26012128423709	2.04316003828739e-05	0.00059592467179106	0	33.5	FFPE-ATAC in FFPE liver
peak_88533	chr9	7716306	7716697	9.0400774440805	6.50341439289788	1.5265796344722	4.26012128423709	2.04316003828739e-05	0.00059592467179106	0	56	FFPE-ATAC in FFPE liver
peak_91449	chr9	75769810	75770124	9.0400774440805	6.50341439289788	1.5265796344722	4.26012128423709	2.04316003828739e-05	0.00059592467179106	0	44	FFPE-ATAC in FFPE liver
peak_93563	chrUn_random	4322996	4323217	9.0400774440805	6.50341439289788	1.5265796344722	4.26012128423709	2.04316003828739e-05	0.00059592467179106	0	31.5	FFPE-ATAC in FFPE liver
peak_95921	chrY_random	6521840	6522047	9.0400774440805	6.50341439289788	1.5265796344722	4.26012128423709	2.04316003828739e-05	0.00059592467179106	0	29.5	FFPE-ATAC in FFPE liver
peak_1515	chr1	64592459	64592843	9.0386079001231	6.50326091379985	1.52656247251831	4.26006863844339	2.04364135038828e-05	0.00059592467179106	1	54.5	FFPE-ATAC in FFPE liver
peak_3109	chr1	122526189	122526730	9.0386079001231	6.50326091379985	1.52656247251831	4.26006863844339	2.04364135038828e-05	0.00059592467179106	0	77.5	FFPE-ATAC in FFPE liver
peak_7326	chr10	24817652	24817934	9.0386079001231	6.50326091379985	1.52656247251831	4.26006863844339	2.04364135038828e-05	0.00059592467179106	0	40	FFPE-ATAC in FFPE liver
peak_7756	chr10	40842008	40842372	9.0386079001231	6.50326091379985	1.52656247251831	4.26006863844339	2.04364135038828e-05	0.00059592467179106	0	50.5	FFPE-ATAC in FFPE liver
peak_9509	chr10	80473304	80473773	9.0386079001231	6.50326091379985	1.52656247251831	4.26006863844339	2.04364135038828e-05	0.00059592467179106	1	65.5	FFPE-ATAC in FFPE liver
peak_12248	chr11	18672028	18672376	9.0386079001231	6.50326091379985	1.52656247251831	4.26006863844339	2.04364135038828e-05	0.00059592467179106	0	50	FFPE-ATAC in FFPE liver
peak_26475	chr14	20920732	20921147	9.0386079001231	6.50326091379985	1.52656247251831	4.26006863844339	2.04364135038828e-05	0.00059592467179106	0	60	FFPE-ATAC in FFPE liver
peak_33420	chr15	97351826	97352414	9.0386079001231	6.50326091379985	1.52656247251831	4.26006863844339	2.04364135038828e-05	0.00059592467179106	1	83.5	FFPE-ATAC in FFPE liver
peak_34355	chr16	12614335	12614697	9.0386079001231	6.50326091379985	1.52656247251831	4.26006863844339	2.04364135038828e-05	0.00059592467179106	0	51.5	FFPE-ATAC in FFPE liver
peak_36051	chr16	47159293	47159508	9.0386079001231	6.50326091379985	1.52656247251831	4.26006863844339	2.04364135038828e-05	0.00059592467179106	0	30.5	FFPE-ATAC in FFPE liver
peak_39248	chr17	35530539	35531339	9.0386079001231	6.50326091379985	1.52656247251831	4.26006863844339	2.04364135038828e-05	0.00059592467179106	0	114	FFPE-ATAC in FFPE liver
peak_41459	chr17_random	345736	346014	9.0386079001231	6.50326091379985	1.52656247251831	4.26006863844339	2.04364135038828e-05	0.00059592467179106	0	39.5	FFPE-ATAC in FFPE liver
peak_42905	chr18	46314275	46314541	9.0386079001231	6.50326091379985	1.52656247251831	4.26006863844339	2.04364135038828e-05	0.00059592467179106	0	38	FFPE-ATAC in FFPE liver
peak_47076	chr19	54871360	54871647	9.0386079001231	6.50326091379985	1.52656247251831	4.26006863844339	2.04364135038828e-05	0.00059592467179106	0	40	FFPE-ATAC in FFPE liver
peak_47492	chr1_random	807349	807686	9.0386079001231	6.50326091379985	1.52656247251831	4.26006863844339	2.04364135038828e-05	0.00059592467179106	0	48.5	FFPE-ATAC in FFPE liver
peak_54007	chr2	168422553	168422968	9.0386079001231	6.50326091379985	1.52656247251831	4.26006863844339	2.04364135038828e-05	0.00059592467179106	0	59	FFPE-ATAC in FFPE liver
peak_54209	chr2	172309031	172309436	9.0386079001231	6.50326091379985	1.52656247251831	4.26006863844339	2.04364135038828e-05	0.00059592467179106	0	57.5	FFPE-ATAC in FFPE liver
peak_60878	chr4	48398407	48398890	9.0386079001231	6.50326091379985	1.52656247251831	4.26006863844339	2.04364135038828e-05	0.00059592467179106	1	68	FFPE-ATAC in FFPE liver
peak_61063	chr4	54005416	54005783	9.0386079001231	6.50326091379985	1.52656247251831	4.26006863844339	2.04364135038828e-05	0.00059592467179106	0	52	FFPE-ATAC in FFPE liver
peak_90670	chr9	63170275	63170626	9.0386079001231	6.50326091379985	1.52656247251831	4.26006863844339	2.04364135038828e-05	0.00059592467179106	0	50	FFPE-ATAC in FFPE liver
peak_94378	chrX	49160888	49161239	9.0386079001231	6.50326091379985	1.52656247251831	4.26006863844339	2.04364135038828e-05	0.00059592467179106	0	50.5	FFPE-ATAC in FFPE liver
peak_96038	chrY_random	39548606	39548947	9.0386079001231	6.50326091379985	1.52656247251831	4.26006863844339	2.04364135038828e-05	0.00059592467179106	0	49	FFPE-ATAC in FFPE liver
peak_80424	chr7	88733729	88734038	15.6409243903434	3.10739566471376	0.729654611846796	4.25872133782416	2.05599579178632e-05	0.00059592467179106	10.5	68	FFPE-ATAC in FFPE liver
peak_5060	chr1	170532333	170532699	9.04081221605919	6.5034915899705	1.52714366780044	4.25859840635527	2.05712657887366e-05	0.00059592467179106	0	51.5	FFPE-ATAC in FFPE liver
peak_7179	chr10	21921833	21922046	9.04081221605919	6.5034915899705	1.52714366780044	4.25859840635527	2.05712657887366e-05	0.00059592467179106	0	30.5	FFPE-ATAC in FFPE liver
peak_12020	chr11	6657985	6658253	9.04081221605919	6.5034915899705	1.52714366780044	4.25859840635527	2.05712657887366e-05	0.00059592467179106	0	37.5	FFPE-ATAC in FFPE liver
peak_27715	chr14	49268983	49269424	9.04081221605919	6.5034915899705	1.52714366780044	4.25859840635527	2.05712657887366e-05	0.00059592467179106	0	63.5	FFPE-ATAC in FFPE liver
peak_28995	chr14	76899009	76899412	9.04081221605919	6.5034915899705	1.52714366780044	4.25859840635527	2.05712657887366e-05	0.00059592467179106	1	57	FFPE-ATAC in FFPE liver
peak_30610	chr15	31093383	31093599	9.04081221605919	6.5034915899705	1.52714366780044	4.25859840635527	2.05712657887366e-05	0.00059592467179106	0	31	FFPE-ATAC in FFPE liver
peak_36649	chr16	78660660	78661387	9.04081221605919	6.5034915899705	1.52714366780044	4.25859840635527	2.05712657887366e-05	0.00059592467179106	1	103.5	FFPE-ATAC in FFPE liver
peak_37707	chr17	6860422	6860874	9.04081221605919	6.5034915899705	1.52714366780044	4.25859840635527	2.05712657887366e-05	0.00059592467179106	0	64.5	FFPE-ATAC in FFPE liver
peak_37973	chr17	13625074	13625529	9.04081221605919	6.5034915899705	1.52714366780044	4.25859840635527	2.05712657887366e-05	0.00059592467179106	1	65	FFPE-ATAC in FFPE liver
peak_39805	chr17	48220409	48220788	9.04081221605919	6.5034915899705	1.52714366780044	4.25859840635527	2.05712657887366e-05	0.00059592467179106	1	54	FFPE-ATAC in FFPE liver
peak_41249	chr17	87026775	87027255	9.04081221605919	6.5034915899705	1.52714366780044	4.25859840635527	2.05712657887366e-05	0.00059592467179106	1.5	69.5	FFPE-ATAC in FFPE liver
peak_45557	chr19	26128319	26128547	9.04081221605919	6.5034915899705	1.52714366780044	4.25859840635527	2.05712657887366e-05	0.00059592467179106	0	33	FFPE-ATAC in FFPE liver
peak_50696	chr2	90631787	90632164	9.04081221605919	6.5034915899705	1.52714366780044	4.25859840635527	2.05712657887366e-05	0.00059592467179106	0	53.5	FFPE-ATAC in FFPE liver
peak_53705	chr2	165627480	165627927	9.04081221605919	6.5034915899705	1.52714366780044	4.25859840635527	2.05712657887366e-05	0.00059592467179106	0	64.5	FFPE-ATAC in FFPE liver
peak_55792	chr3	53302775	53303110	9.04081221605919	6.5034915899705	1.52714366780044	4.25859840635527	2.05712657887366e-05	0.00059592467179106	0	48	FFPE-ATAC in FFPE liver
peak_59644	chr4	4511748	4512280	9.04081221605919	6.5034915899705	1.52714366780044	4.25859840635527	2.05712657887366e-05	0.00059592467179106	0	74.5	FFPE-ATAC in FFPE liver
peak_60890	chr4	48724385	48724729	9.04081221605919	6.5034915899705	1.52714366780044	4.25859840635527	2.05712657887366e-05	0.00059592467179106	0	48.5	FFPE-ATAC in FFPE liver
peak_62707	chr4	105738560	105738921	9.04081221605919	6.5034915899705	1.52714366780044	4.25859840635527	2.05712657887366e-05	0.00059592467179106	0	51.5	FFPE-ATAC in FFPE liver
peak_65163	chr4	145713809	145714037	9.04081221605919	6.5034915899705	1.52714366780044	4.25859840635527	2.05712657887366e-05	0.00059592467179106	0	32.5	FFPE-ATAC in FFPE liver
peak_65199	chr4	147045378	147045769	9.04081221605919	6.5034915899705	1.52714366780044	4.25859840635527	2.05712657887366e-05	0.00059592467179106	0	55.5	FFPE-ATAC in FFPE liver
peak_67248	chr5	52135504	52136205	9.04081221605919	6.5034915899705	1.52714366780044	4.25859840635527	2.05712657887366e-05	0.00059592467179106	2	100	FFPE-ATAC in FFPE liver
peak_67780	chr5	72876690	72877235	9.04081221605919	6.5034915899705	1.52714366780044	4.25859840635527	2.05712657887366e-05	0.00059592467179106	0	78.5	FFPE-ATAC in FFPE liver
peak_72156	chr6	17305001	17305640	9.04081221605919	6.5034915899705	1.52714366780044	4.25859840635527	2.05712657887366e-05	0.00059592467179106	1	91	FFPE-ATAC in FFPE liver
peak_74111	chr6	73097858	73098265	9.04081221605919	6.5034915899705	1.52714366780044	4.25859840635527	2.05712657887366e-05	0.00059592467179106	0	58	FFPE-ATAC in FFPE liver
peak_78725	chr7	34622985	34623238	9.04081221605919	6.5034915899705	1.52714366780044	4.25859840635527	2.05712657887366e-05	0.00059592467179106	0	35.5	FFPE-ATAC in FFPE liver
peak_79449	chr7	62186315	62186666	9.04081221605919	6.5034915899705	1.52714366780044	4.25859840635527	2.05712657887366e-05	0.00059592467179106	0	49	FFPE-ATAC in FFPE liver
peak_81758	chr7	125454424	125454857	9.04081221605919	6.5034915899705	1.52714366780044	4.25859840635527	2.05712657887366e-05	0.00059592467179106	0	60.5	FFPE-ATAC in FFPE liver
peak_82734	chr7	145892023	145892389	9.04081221605919	6.5034915899705	1.52714366780044	4.25859840635527	2.05712657887366e-05	0.00059592467179106	0	53	FFPE-ATAC in FFPE liver
peak_87574	chr8	121614366	121614747	9.04081221605919	6.5034915899705	1.52714366780044	4.25859840635527	2.05712657887366e-05	0.00059592467179106	0	55.5	FFPE-ATAC in FFPE liver
peak_88621	chr9	13217549	13217967	9.04081221605919	6.5034915899705	1.52714366780044	4.25859840635527	2.05712657887366e-05	0.00059592467179106	1	60	FFPE-ATAC in FFPE liver
peak_89756	chr9	45546698	45547074	9.04081221605919	6.5034915899705	1.52714366780044	4.25859840635527	2.05712657887366e-05	0.00059592467179106	1	53	FFPE-ATAC in FFPE liver
peak_95895	chrY	2485049	2485381	9.04081221605919	6.5034915899705	1.52714366780044	4.25859840635527	2.05712657887366e-05	0.00059592467179106	0	46.5	FFPE-ATAC in FFPE liver
peak_4611	chr1	161632082	161632437	9.0378731281444	6.50318372462816	1.52710925272682	4.25849277844137	2.0580986719054e-05	0.00059592467179106	1	51	FFPE-ATAC in FFPE liver
peak_20563	chr12	96547867	96548364	9.0378731281444	6.50318372462816	1.52710925272682	4.25849277844137	2.0580986719054e-05	0.00059592467179106	0	70	FFPE-ATAC in FFPE liver
peak_29184	chr14	88292233	88292734	9.0378731281444	6.50318372462816	1.52710925272682	4.25849277844137	2.0580986719054e-05	0.00059592467179106	0	70.5	FFPE-ATAC in FFPE liver
peak_36518	chr16	76045546	76045757	9.0378731281444	6.50318372462816	1.52710925272682	4.25849277844137	2.0580986719054e-05	0.00059592467179106	0	30.5	FFPE-ATAC in FFPE liver
peak_58659	chr3	131027112	131027323	9.0378731281444	6.50318372462816	1.52710925272682	4.25849277844137	2.0580986719054e-05	0.00059592467179106	0	30	FFPE-ATAC in FFPE liver
peak_61107	chr4	55183444	55183811	9.0378731281444	6.50318372462816	1.52710925272682	4.25849277844137	2.0580986719054e-05	0.00059592467179106	1	52	FFPE-ATAC in FFPE liver
peak_64215	chr4	133411106	133411458	9.0378731281444	6.50318372462816	1.52710925272682	4.25849277844137	2.0580986719054e-05	0.00059592467179106	0	50	FFPE-ATAC in FFPE liver
peak_70920	chr5	138492637	138493103	9.0378731281444	6.50318372462816	1.52710925272682	4.25849277844137	2.0580986719054e-05	0.00059592467179106	0	65	FFPE-ATAC in FFPE liver
peak_73035	chr6	39826656	39826862	9.0378731281444	6.50318372462816	1.52710925272682	4.25849277844137	2.0580986719054e-05	0.00059592467179106	0	29	FFPE-ATAC in FFPE liver
peak_77719	chr7	11327750	11328095	9.0378731281444	6.50318372462816	1.52710925272682	4.25849277844137	2.0580986719054e-05	0.00059592467179106	0	48.5	FFPE-ATAC in FFPE liver
peak_21248	chr12	111250878	111251428	9.04154698803789	6.50356969247838	1.52808635577933	4.25602235625062	2.08095908052226e-05	0.000600460013734836	0	78	FFPE-ATAC in FFPE liver
peak_25629	chr13	110940875	110941516	9.04154698803789	6.50356969247838	1.52808635577933	4.25602235625062	2.08095908052226e-05	0.000600460013734836	1	91	FFPE-ATAC in FFPE liver
peak_33437	chr15	97573253	97573542	9.04154698803789	6.50356969247838	1.52808635577933	4.25602235625062	2.08095908052226e-05	0.000600460013734836	0	41.5	FFPE-ATAC in FFPE liver
peak_49176	chr2	36061261	36061865	9.04154698803789	6.50356969247838	1.52808635577933	4.25602235625062	2.08095908052226e-05	0.000600460013734836	0	85	FFPE-ATAC in FFPE liver
peak_65664	chr4	152837908	152838247	9.04154698803789	6.50356969247838	1.52808635577933	4.25602235625062	2.08095908052226e-05	0.000600460013734836	0	48	FFPE-ATAC in FFPE liver
peak_84511	chr8	40318386	40318747	9.04154698803789	6.50356969247838	1.52808635577933	4.25602235625062	2.08095908052226e-05	0.000600460013734836	0.5	50.5	FFPE-ATAC in FFPE liver
peak_2008	chr1	78943034	78943400	9.03713835616571	6.50310563427343	1.52803451209526	4.25586305989667	2.08244141917734e-05	0.000600460013734836	0	52	FFPE-ATAC in FFPE liver
peak_59030	chr3	142550150	142550362	9.03713835616571	6.50310563427343	1.52803451209526	4.25586305989667	2.08244141917734e-05	0.000600460013734836	0	30	FFPE-ATAC in FFPE liver
peak_6036	chr1	191104275	191104754	9.04228176001659	6.50364912922366	1.52942035031433	4.25236209776275	2.11527473589292e-05	0.000608993806676995	0	67.5	FFPE-ATAC in FFPE liver
peak_61459	chr4	61265024	61265246	9.04228176001659	6.50364912922366	1.52942035031433	4.25236209776275	2.11527473589292e-05	0.000608993806676995	0	31.5	FFPE-ATAC in FFPE liver
peak_78677	chr7	31721280	31721565	9.04228176001659	6.50364912922366	1.52942035031433	4.25236209776275	2.11527473589292e-05	0.000608993806676995	0.5	41	FFPE-ATAC in FFPE liver
peak_85308	chr8	72110267	72110507	9.04228176001659	6.50364912922366	1.52942035031433	4.25236209776275	2.11527473589292e-05	0.000608993806676995	0	34	FFPE-ATAC in FFPE liver
peak_85296	chr8	72055932	72056142	9.03640358418701	6.50302620974055	1.52935082984453	4.25214808978896	2.11729768307613e-05	0.000609211203410126	0	30	FFPE-ATAC in FFPE liver
peak_28047	chr14	57312691	57313156	14.7790428186346	4.71607051524391	1.10987291056262	4.24919868785089	2.14536569568302e-05	0.000616772146219434	5	104.5	FFPE-ATAC in FFPE liver
peak_52433	chr2	136938890	136939225	14.7783080466559	4.71601800493668	1.10986424074396	4.24918456853378	2.14550091029486e-05	0.000616772146219434	3.5	75	FFPE-ATAC in FFPE liver
peak_36197	chr16	55854341	55855226	9.04301653199528	6.50373033272075	1.5311709516042	4.24755336816365	2.16117693919663e-05	0.000620721536792214	2	128	FFPE-ATAC in FFPE liver
peak_93480	chrUn_random	2441800	2442089	9.04301653199528	6.50373033272075	1.5311709516042	4.24755336816365	2.16117693919663e-05	0.000620721536792214	0	41.5	FFPE-ATAC in FFPE liver
peak_93478	chrUn_random	2434418	2434669	9.03566881220831	6.5029450163973	1.53108332655807	4.24728354335629	2.16378047384681e-05	0.000621283630408205	0	36	FFPE-ATAC in FFPE liver
peak_39796	chr17	48126256	48126544	14.1919378666749	3.59685603431015	0.847968534125866	4.24173290583004	2.2180055636281e-05	0.00063552406283777	6	59	FFPE-ATAC in FFPE liver
peak_63591	chr4	124575043	124575303	9.04375130397398	6.50381359807308	1.53331648003006	4.24166418529954	2.21868494241867e-05	0.000635529240942828	0	37.5	FFPE-ATAC in FFPE liver
peak_1590	chr1	67092289	67092512	13.9168400365203	4.0121111959237	0.946103226860354	4.24066960350395	2.22853969232844e-05	0.000637781779369111	3	46	FFPE-ATAC in FFPE liver
peak_56052	chr3	61962932	61963306	13.9161052645416	4.01205639567948	0.946563116438684	4.23855137180319	2.24966708394476e-05	0.000638401396214463	7	76.5	FFPE-ATAC in FFPE liver
peak_11736	chr11	3004554	3004773	21.7390929860549	6.30883452129363	1.48849920819201	4.23838621248351	2.25132238116751e-05	0.000638401396214463	1	73.5	FFPE-ATAC in FFPE liver
peak_93545	chrUn_random	4062747	4064283	21.7390929860549	6.30883452129363	1.48849920819201	4.23838621248351	2.25132238116751e-05	0.000638401396214463	10	515	FFPE-ATAC in FFPE liver
peak_12602	chr11	31270160	31270531	14.1945446270696	3.59600423002792	0.848559341757499	4.23777578428402	2.25745041834678e-05	0.000638401396214463	7.5	77	FFPE-ATAC in FFPE liver
peak_282	chr1	19187633	19187845	8.8137264912886	6.46685100406456	1.52784155650072	4.23267123253008	2.3093196647657e-05	0.000638401396214463	0	29.5	FFPE-ATAC in FFPE liver
peak_4011	chr1	140597240	140597763	8.8137264912886	6.46685100406456	1.52784155650072	4.23267123253008	2.3093196647657e-05	0.000638401396214463	0	73.5	FFPE-ATAC in FFPE liver
peak_6567	chr10	7006553	7006896	8.8137264912886	6.46685100406456	1.52784155650072	4.23267123253008	2.3093196647657e-05	0.000638401396214463	0	48	FFPE-ATAC in FFPE liver
peak_7674	chr10	39364491	39365009	8.8137264912886	6.46685100406456	1.52784155650072	4.23267123253008	2.3093196647657e-05	0.000638401396214463	2	71	FFPE-ATAC in FFPE liver
peak_21852	chr13	6248489	6249144	8.8137264912886	6.46685100406456	1.52784155650072	4.23267123253008	2.3093196647657e-05	0.000638401396214463	0	89	FFPE-ATAC in FFPE liver
peak_24769	chr13	90489611	90490073	8.8137264912886	6.46685100406456	1.52784155650072	4.23267123253008	2.3093196647657e-05	0.000638401396214463	0	64	FFPE-ATAC in FFPE liver
peak_39367	chr17	39793244	39793579	8.8137264912886	6.46685100406456	1.52784155650072	4.23267123253008	2.3093196647657e-05	0.000638401396214463	0	46.5	FFPE-ATAC in FFPE liver
peak_39679	chr17	47042270	47042656	8.8137264912886	6.46685100406456	1.52784155650072	4.23267123253008	2.3093196647657e-05	0.000638401396214463	0	54	FFPE-ATAC in FFPE liver
peak_42389	chr18	34891497	34891877	8.8137264912886	6.46685100406456	1.52784155650072	4.23267123253008	2.3093196647657e-05	0.000638401396214463	1	53	FFPE-ATAC in FFPE liver
peak_45134	chr19	11874626	11875152	8.8137264912886	6.46685100406456	1.52784155650072	4.23267123253008	2.3093196647657e-05	0.000638401396214463	0	73.5	FFPE-ATAC in FFPE liver
peak_45232	chr19	16841285	16841778	8.8137264912886	6.46685100406456	1.52784155650072	4.23267123253008	2.3093196647657e-05	0.000638401396214463	0	68.5	FFPE-ATAC in FFPE liver
peak_50843	chr2	92830141	92830356	8.8137264912886	6.46685100406456	1.52784155650072	4.23267123253008	2.3093196647657e-05	0.000638401396214463	0	30	FFPE-ATAC in FFPE liver
peak_54157	chr2	170554794	170555246	8.8137264912886	6.46685100406456	1.52784155650072	4.23267123253008	2.3093196647657e-05	0.000638401396214463	0	62	FFPE-ATAC in FFPE liver
peak_55175	chr3	29889164	29889533	8.8137264912886	6.46685100406456	1.52784155650072	4.23267123253008	2.3093196647657e-05	0.000638401396214463	1	51.5	FFPE-ATAC in FFPE liver
peak_60045	chr4	19210878	19211255	8.8137264912886	6.46685100406456	1.52784155650072	4.23267123253008	2.3093196647657e-05	0.000638401396214463	0	52	FFPE-ATAC in FFPE liver
peak_60531	chr4	42820340	42820775	8.8137264912886	6.46685100406456	1.52784155650072	4.23267123253008	2.3093196647657e-05	0.000638401396214463	0	60	FFPE-ATAC in FFPE liver
peak_61155	chr4	56441610	56442016	8.8137264912886	6.46685100406456	1.52784155650072	4.23267123253008	2.3093196647657e-05	0.000638401396214463	1	55.5	FFPE-ATAC in FFPE liver
peak_61419	chr4	60817975	60818804	8.8137264912886	6.46685100406456	1.52784155650072	4.23267123253008	2.3093196647657e-05	0.000638401396214463	0	113.5	FFPE-ATAC in FFPE liver
peak_66218	chr5	20861645	20862133	8.8137264912886	6.46685100406456	1.52784155650072	4.23267123253008	2.3093196647657e-05	0.000638401396214463	0	68	FFPE-ATAC in FFPE liver
peak_69272	chr5	113055465	113055677	8.8137264912886	6.46685100406456	1.52784155650072	4.23267123253008	2.3093196647657e-05	0.000638401396214463	0	29	FFPE-ATAC in FFPE liver
peak_70518	chr5	132887330	132887766	8.8137264912886	6.46685100406456	1.52784155650072	4.23267123253008	2.3093196647657e-05	0.000638401396214463	0	60.5	FFPE-ATAC in FFPE liver
peak_70709	chr5	136138483	136139037	8.8137264912886	6.46685100406456	1.52784155650072	4.23267123253008	2.3093196647657e-05	0.000638401396214463	2	76.5	FFPE-ATAC in FFPE liver
peak_77890	chr7	17311616	17311842	8.8137264912886	6.46685100406456	1.52784155650072	4.23267123253008	2.3093196647657e-05	0.000638401396214463	0	31.5	FFPE-ATAC in FFPE liver
peak_79576	chr7	71160198	71160541	8.8137264912886	6.46685100406456	1.52784155650072	4.23267123253008	2.3093196647657e-05	0.000638401396214463	0	47.5	FFPE-ATAC in FFPE liver
peak_82073	chr7	132731101	132731486	8.8137264912886	6.46685100406456	1.52784155650072	4.23267123253008	2.3093196647657e-05	0.000638401396214463	0	54	FFPE-ATAC in FFPE liver
peak_82340	chr7	136806456	136806873	8.8137264912886	6.46685100406456	1.52784155650072	4.23267123253008	2.3093196647657e-05	0.000638401396214463	1	58	FFPE-ATAC in FFPE liver
peak_82456	chr7	138660655	138661307	8.8137264912886	6.46685100406456	1.52784155650072	4.23267123253008	2.3093196647657e-05	0.000638401396214463	1	90	FFPE-ATAC in FFPE liver
peak_83346	chr8	10266504	10266903	8.8137264912886	6.46685100406456	1.52784155650072	4.23267123253008	2.3093196647657e-05	0.000638401396214463	0	56	FFPE-ATAC in FFPE liver
peak_85009	chr8	59762897	59763270	8.8137264912886	6.46685100406456	1.52784155650072	4.23267123253008	2.3093196647657e-05	0.000638401396214463	0	52	FFPE-ATAC in FFPE liver
peak_85242	chr8	71133429	71133876	8.8137264912886	6.46685100406456	1.52784155650072	4.23267123253008	2.3093196647657e-05	0.000638401396214463	0	62	FFPE-ATAC in FFPE liver
peak_86280	chr8	92673138	92673489	8.8137264912886	6.46685100406456	1.52784155650072	4.23267123253008	2.3093196647657e-05	0.000638401396214463	0	48.5	FFPE-ATAC in FFPE liver
peak_88451	chr8_random	479368	480122	8.8137264912886	6.46685100406456	1.52784155650072	4.23267123253008	2.3093196647657e-05	0.000638401396214463	0	104	FFPE-ATAC in FFPE liver
peak_88748	chr9	15864606	15865075	8.8137264912886	6.46685100406456	1.52784155650072	4.23267123253008	2.3093196647657e-05	0.000638401396214463	0	66	FFPE-ATAC in FFPE liver
peak_91430	chr9	75183043	75183482	8.8137264912886	6.46685100406456	1.52784155650072	4.23267123253008	2.3093196647657e-05	0.000638401396214463	0	61	FFPE-ATAC in FFPE liver
peak_91976	chr9	95948267	95948636	8.8137264912886	6.46685100406456	1.52784155650072	4.23267123253008	2.3093196647657e-05	0.000638401396214463	1	51	FFPE-ATAC in FFPE liver
peak_92872	chr9	114443248	114443589	8.8137264912886	6.46685100406456	1.52784155650072	4.23267123253008	2.3093196647657e-05	0.000638401396214463	0	47.5	FFPE-ATAC in FFPE liver
peak_93445	chr9	123910637	123911162	8.8137264912886	6.46685100406456	1.52784155650072	4.23267123253008	2.3093196647657e-05	0.000638401396214463	0	73	FFPE-ATAC in FFPE liver
peak_95930	chrY_random	8300907	8301109	8.8137264912886	6.46685100406456	1.52784155650072	4.23267123253008	2.3093196647657e-05	0.000638401396214463	0	27.5	FFPE-ATAC in FFPE liver
peak_96061	chrY_random	45306041	45306265	8.8137264912886	6.46685100406456	1.52784155650072	4.23267123253008	2.3093196647657e-05	0.000638401396214463	0	31	FFPE-ATAC in FFPE liver
peak_13501	chr11	57397015	57397231	8.8129917193099	6.46677263824856	1.52783431821249	4.23263999319929	2.30964056338562e-05	0.000638401396214463	0	30	FFPE-ATAC in FFPE liver
peak_27309	chr14	37050830	37051185	8.8129917193099	6.46677263824856	1.52783431821249	4.23263999319929	2.30964056338562e-05	0.000638401396214463	0	49	FFPE-ATAC in FFPE liver
peak_27457	chr14	44161683	44161923	8.8129917193099	6.46677263824856	1.52783431821249	4.23263999319929	2.30964056338562e-05	0.000638401396214463	0	33	FFPE-ATAC in FFPE liver
peak_28653	chr14	69779906	69780267	8.8129917193099	6.46677263824856	1.52783431821249	4.23263999319929	2.30964056338562e-05	0.000638401396214463	0.5	50	FFPE-ATAC in FFPE liver
peak_30606	chr15	30878495	30878952	8.8129917193099	6.46677263824856	1.52783431821249	4.23263999319929	2.30964056338562e-05	0.000638401396214463	1	63.5	FFPE-ATAC in FFPE liver
peak_37697	chr17	6201022	6201222	8.8129917193099	6.46677263824856	1.52783431821249	4.23263999319929	2.30964056338562e-05	0.000638401396214463	0	27.5	FFPE-ATAC in FFPE liver
peak_41452	chr17_random	28284	29277	8.8129917193099	6.46677263824856	1.52783431821249	4.23263999319929	2.30964056338562e-05	0.000638401396214463	0	135.5	FFPE-ATAC in FFPE liver
peak_43014	chr18	49316606	49317014	8.8129917193099	6.46677263824856	1.52783431821249	4.23263999319929	2.30964056338562e-05	0.000638401396214463	0	57.5	FFPE-ATAC in FFPE liver
peak_47241	chr19	57042438	57042702	8.8129917193099	6.46677263824856	1.52783431821249	4.23263999319929	2.30964056338562e-05	0.000638401396214463	0	36.5	FFPE-ATAC in FFPE liver
peak_53989	chr2	168133458	168133815	8.8129917193099	6.46677263824856	1.52783431821249	4.23263999319929	2.30964056338562e-05	0.000638401396214463	0.5	49.5	FFPE-ATAC in FFPE liver
peak_64814	chr4	140023806	140024049	8.8129917193099	6.46677263824856	1.52783431821249	4.23263999319929	2.30964056338562e-05	0.000638401396214463	0	33.5	FFPE-ATAC in FFPE liver
peak_67551	chr5	65435868	65436345	8.8129917193099	6.46677263824856	1.52783431821249	4.23263999319929	2.30964056338562e-05	0.000638401396214463	0	66.5	FFPE-ATAC in FFPE liver
peak_68803	chr5	103266790	103267009	8.8129917193099	6.46677263824856	1.52783431821249	4.23263999319929	2.30964056338562e-05	0.000638401396214463	0	30.5	FFPE-ATAC in FFPE liver
peak_71853	chr6	3776520	3776732	8.8129917193099	6.46677263824856	1.52783431821249	4.23263999319929	2.30964056338562e-05	0.000638401396214463	0	29	FFPE-ATAC in FFPE liver
peak_72838	chr6	37147284	37147806	8.8129917193099	6.46677263824856	1.52783431821249	4.23263999319929	2.30964056338562e-05	0.000638401396214463	2	72	FFPE-ATAC in FFPE liver
peak_74172	chr6	81538612	81538975	8.8129917193099	6.46677263824856	1.52783431821249	4.23263999319929	2.30964056338562e-05	0.000638401396214463	0	50.5	FFPE-ATAC in FFPE liver
peak_75643	chr6	115190472	115190865	8.8129917193099	6.46677263824856	1.52783431821249	4.23263999319929	2.30964056338562e-05	0.000638401396214463	2	54	FFPE-ATAC in FFPE liver
peak_76173	chr6	124553998	124554226	8.8129917193099	6.46677263824856	1.52783431821249	4.23263999319929	2.30964056338562e-05	0.000638401396214463	0	31	FFPE-ATAC in FFPE liver
peak_76818	chr6	136998747	136999116	8.8129917193099	6.46677263824856	1.52783431821249	4.23263999319929	2.30964056338562e-05	0.000638401396214463	0	50.5	FFPE-ATAC in FFPE liver
peak_78919	chr7	39062650	39062875	8.8129917193099	6.46677263824856	1.52783431821249	4.23263999319929	2.30964056338562e-05	0.000638401396214463	0	31.5	FFPE-ATAC in FFPE liver
peak_80659	chr7	97928175	97928393	8.8129917193099	6.46677263824856	1.52783431821249	4.23263999319929	2.30964056338562e-05	0.000638401396214463	0	30	FFPE-ATAC in FFPE liver
peak_83295	chr8	7884951	7885246	8.8129917193099	6.46677263824856	1.52783431821249	4.23263999319929	2.30964056338562e-05	0.000638401396214463	0	41	FFPE-ATAC in FFPE liver
peak_83343	chr8	10168626	10169083	8.8129917193099	6.46677263824856	1.52783431821249	4.23263999319929	2.30964056338562e-05	0.000638401396214463	1	63.5	FFPE-ATAC in FFPE liver
peak_83752	chr8	19802186	19802783	8.8129917193099	6.46677263824856	1.52783431821249	4.23263999319929	2.30964056338562e-05	0.000638401396214463	2	84	FFPE-ATAC in FFPE liver
peak_95936	chrY_random	8897790	8897995	8.8129917193099	6.46677263824856	1.52783431821249	4.23263999319929	2.30964056338562e-05	0.000638401396214463	0	28.5	FFPE-ATAC in FFPE liver
peak_95947	chrY_random	11504327	11504666	8.8129917193099	6.46677263824856	1.52783431821249	4.23263999319929	2.30964056338562e-05	0.000638401396214463	0	46	FFPE-ATAC in FFPE liver
peak_763	chr1	39411433	39411778	8.8144612632673	6.46692961184067	1.52823440725719	4.23163461124216	2.31999079893962e-05	0.000638401396214463	0	47.5	FFPE-ATAC in FFPE liver
peak_3374	chr1	132351687	132352115	8.8144612632673	6.46692961184067	1.52823440725719	4.23163461124216	2.31999079893962e-05	0.000638401396214463	1.5	59.5	FFPE-ATAC in FFPE liver
peak_5423	chr1	177467935	177468284	8.8144612632673	6.46692961184067	1.52823440725719	4.23163461124216	2.31999079893962e-05	0.000638401396214463	0	48	FFPE-ATAC in FFPE liver
peak_16418	chr11	104373102	104373455	8.8144612632673	6.46692961184067	1.52823440725719	4.23163461124216	2.31999079893962e-05	0.000638401396214463	0	48	FFPE-ATAC in FFPE liver
peak_18166	chr12	17461030	17461279	8.8144612632673	6.46692961184067	1.52823440725719	4.23163461124216	2.31999079893962e-05	0.000638401396214463	0.5	35	FFPE-ATAC in FFPE liver
peak_20492	chr12	92493292	92493630	8.8144612632673	6.46692961184067	1.52823440725719	4.23163461124216	2.31999079893962e-05	0.000638401396214463	0	47	FFPE-ATAC in FFPE liver
peak_26082	chr14	4923265	4923469	8.8144612632673	6.46692961184067	1.52823440725719	4.23163461124216	2.31999079893962e-05	0.000638401396214463	0	28	FFPE-ATAC in FFPE liver
peak_27358	chr14	41134349	41134557	8.8144612632673	6.46692961184067	1.52823440725719	4.23163461124216	2.31999079893962e-05	0.000638401396214463	0	29	FFPE-ATAC in FFPE liver
peak_32029	chr15	75408135	75408335	8.8144612632673	6.46692961184067	1.52823440725719	4.23163461124216	2.31999079893962e-05	0.000638401396214463	0	28	FFPE-ATAC in FFPE liver
peak_35058	chr16	26993368	26993890	8.8144612632673	6.46692961184067	1.52823440725719	4.23163461124216	2.31999079893962e-05	0.000638401396214463	0	73.5	FFPE-ATAC in FFPE liver
peak_35696	chr16	37244848	37245265	8.8144612632673	6.46692961184067	1.52823440725719	4.23163461124216	2.31999079893962e-05	0.000638401396214463	0	57	FFPE-ATAC in FFPE liver
peak_36328	chr16	59549475	59549830	8.8144612632673	6.46692961184067	1.52823440725719	4.23163461124216	2.31999079893962e-05	0.000638401396214463	0	49.5	FFPE-ATAC in FFPE liver
peak_38142	chr17	19795437	19795738	8.8144612632673	6.46692961184067	1.52823440725719	4.23163461124216	2.31999079893962e-05	0.000638401396214463	0	41.5	FFPE-ATAC in FFPE liver
peak_39875	chr17	49993318	49993690	8.8144612632673	6.46692961184067	1.52823440725719	4.23163461124216	2.31999079893962e-05	0.000638401396214463	0	51	FFPE-ATAC in FFPE liver
peak_41568	chr18	5102372	5102761	8.8144612632673	6.46692961184067	1.52823440725719	4.23163461124216	2.31999079893962e-05	0.000638401396214463	0	55	FFPE-ATAC in FFPE liver
peak_41975	chr18	15927644	15927950	8.8144612632673	6.46692961184067	1.52823440725719	4.23163461124216	2.31999079893962e-05	0.000638401396214463	0	43	FFPE-ATAC in FFPE liver
peak_42799	chr18	42368052	42368472	8.8144612632673	6.46692961184067	1.52823440725719	4.23163461124216	2.31999079893962e-05	0.000638401396214463	0.5	58	FFPE-ATAC in FFPE liver
peak_43035	chr18	50302588	50302953	8.8144612632673	6.46692961184067	1.52823440725719	4.23163461124216	2.31999079893962e-05	0.000638401396214463	1.5	50.5	FFPE-ATAC in FFPE liver
peak_43279	chr18	58661298	58661874	8.8144612632673	6.46692961184067	1.52823440725719	4.23163461124216	2.31999079893962e-05	0.000638401396214463	0	80	FFPE-ATAC in FFPE liver
peak_49670	chr2	58423590	58424043	8.8144612632673	6.46692961184067	1.52823440725719	4.23163461124216	2.31999079893962e-05	0.000638401396214463	1	62.5	FFPE-ATAC in FFPE liver
peak_49861	chr2	62528671	62529048	8.8144612632673	6.46692961184067	1.52823440725719	4.23163461124216	2.31999079893962e-05	0.000638401396214463	1	52.5	FFPE-ATAC in FFPE liver
peak_52505	chr2	143442050	143442393	8.8144612632673	6.46692961184067	1.52823440725719	4.23163461124216	2.31999079893962e-05	0.000638401396214463	0	48	FFPE-ATAC in FFPE liver
peak_53397	chr2	160366716	160367395	8.8144612632673	6.46692961184067	1.52823440725719	4.23163461124216	2.31999079893962e-05	0.000638401396214463	1	94.5	FFPE-ATAC in FFPE liver
peak_55598	chr3	49126812	49127159	8.8144612632673	6.46692961184067	1.52823440725719	4.23163461124216	2.31999079893962e-05	0.000638401396214463	0	48	FFPE-ATAC in FFPE liver
peak_60418	chr4	40585048	40585535	8.8144612632673	6.46692961184067	1.52823440725719	4.23163461124216	2.31999079893962e-05	0.000638401396214463	1	67.5	FFPE-ATAC in FFPE liver
peak_61432	chr4	60973835	60974392	8.8144612632673	6.46692961184067	1.52823440725719	4.23163461124216	2.31999079893962e-05	0.000638401396214463	0	76.5	FFPE-ATAC in FFPE liver
peak_63478	chr4	122795846	122796442	8.8144612632673	6.46692961184067	1.52823440725719	4.23163461124216	2.31999079893962e-05	0.000638401396214463	0	81	FFPE-ATAC in FFPE liver
peak_63490	chr4	122997972	122998567	8.8144612632673	6.46692961184067	1.52823440725719	4.23163461124216	2.31999079893962e-05	0.000638401396214463	0	82.5	FFPE-ATAC in FFPE liver
peak_64511	chr4	136424634	136425161	8.8144612632673	6.46692961184067	1.52823440725719	4.23163461124216	2.31999079893962e-05	0.000638401396214463	0	74	FFPE-ATAC in FFPE liver
peak_67741	chr5	70450589	70450932	8.8144612632673	6.46692961184067	1.52823440725719	4.23163461124216	2.31999079893962e-05	0.000638401396214463	0	48.5	FFPE-ATAC in FFPE liver
peak_68104	chr5	83507693	83508060	8.8144612632673	6.46692961184067	1.52823440725719	4.23163461124216	2.31999079893962e-05	0.000638401396214463	1	50	FFPE-ATAC in FFPE liver
peak_71238	chr5	143276445	143277524	8.8144612632673	6.46692961184067	1.52823440725719	4.23163461124216	2.31999079893962e-05	0.000638401396214463	0	148.5	FFPE-ATAC in FFPE liver
peak_73794	chr6	65663902	65664331	8.8144612632673	6.46692961184067	1.52823440725719	4.23163461124216	2.31999079893962e-05	0.000638401396214463	0	60	FFPE-ATAC in FFPE liver
peak_73859	chr6	70649408	70649857	8.8144612632673	6.46692961184067	1.52823440725719	4.23163461124216	2.31999079893962e-05	0.000638401396214463	0	63	FFPE-ATAC in FFPE liver
peak_81237	chr7	113357305	113358021	8.8144612632673	6.46692961184067	1.52823440725719	4.23163461124216	2.31999079893962e-05	0.000638401396214463	1	99.5	FFPE-ATAC in FFPE liver
peak_82329	chr7	136144980	136145502	8.8144612632673	6.46692961184067	1.52823440725719	4.23163461124216	2.31999079893962e-05	0.000638401396214463	0	71.5	FFPE-ATAC in FFPE liver
peak_87120	chr8	112979661	112980434	8.8144612632673	6.46692961184067	1.52823440725719	4.23163461124216	2.31999079893962e-05	0.000638401396214463	1	108	FFPE-ATAC in FFPE liver
peak_91443	chr9	75504106	75504451	8.8144612632673	6.46692961184067	1.52823440725719	4.23163461124216	2.31999079893962e-05	0.000638401396214463	0	47	FFPE-ATAC in FFPE liver
peak_94596	chrX	70763707	70763920	8.8144612632673	6.46692961184067	1.52823440725719	4.23163461124216	2.31999079893962e-05	0.000638401396214463	0	29	FFPE-ATAC in FFPE liver
peak_95159	chrX	108472083	108472488	8.8144612632673	6.46692961184067	1.52823440725719	4.23163461124216	2.31999079893962e-05	0.000638401396214463	0	56.5	FFPE-ATAC in FFPE liver
peak_5029	chr1	169741975	169742193	8.81225694733121	6.46669403337223	1.52821266010532	4.2315406763654	2.32096009380734e-05	0.000638401396214463	0	30	FFPE-ATAC in FFPE liver
peak_10570	chr10	101646172	101646892	8.81225694733121	6.46669403337223	1.52821266010532	4.2315406763654	2.32096009380734e-05	0.000638401396214463	1	101	FFPE-ATAC in FFPE liver
peak_33064	chr15	88741544	88741999	8.81225694733121	6.46669403337223	1.52821266010532	4.2315406763654	2.32096009380734e-05	0.000638401396214463	0	63	FFPE-ATAC in FFPE liver
peak_36605	chr16	78000250	78000703	8.81225694733121	6.46669403337223	1.52821266010532	4.2315406763654	2.32096009380734e-05	0.000638401396214463	0	63	FFPE-ATAC in FFPE liver
peak_38168	chr17	21817636	21817911	8.81225694733121	6.46669403337223	1.52821266010532	4.2315406763654	2.32096009380734e-05	0.000638401396214463	0	38.5	FFPE-ATAC in FFPE liver
peak_49432	chr2	48614465	48614682	8.81225694733121	6.46669403337223	1.52821266010532	4.2315406763654	2.32096009380734e-05	0.000638401396214463	0	30.5	FFPE-ATAC in FFPE liver
peak_54419	chr2	178864989	178865647	8.81225694733121	6.46669403337223	1.52821266010532	4.2315406763654	2.32096009380734e-05	0.000638401396214463	0	91	FFPE-ATAC in FFPE liver
peak_55600	chr3	49334257	49334481	8.81225694733121	6.46669403337223	1.52821266010532	4.2315406763654	2.32096009380734e-05	0.000638401396214463	0	31	FFPE-ATAC in FFPE liver
peak_61460	chr4	61268484	61268825	8.81225694733121	6.46669403337223	1.52821266010532	4.2315406763654	2.32096009380734e-05	0.000638401396214463	0	48	FFPE-ATAC in FFPE liver
peak_73094	chr6	43286112	43286472	8.81225694733121	6.46669403337223	1.52821266010532	4.2315406763654	2.32096009380734e-05	0.000638401396214463	1	50.5	FFPE-ATAC in FFPE liver
peak_78432	chr7	28882367	28882569	8.81225694733121	6.46669403337223	1.52821266010532	4.2315406763654	2.32096009380734e-05	0.000638401396214463	0	27.5	FFPE-ATAC in FFPE liver
peak_81815	chr7	126352694	126353001	8.81225694733121	6.46669403337223	1.52821266010532	4.2315406763654	2.32096009380734e-05	0.000638401396214463	0	42.5	FFPE-ATAC in FFPE liver
peak_82565	chr7	140457490	140457832	8.81225694733121	6.46669403337223	1.52821266010532	4.2315406763654	2.32096009380734e-05	0.000638401396214463	0	47	FFPE-ATAC in FFPE liver
peak_84030	chr8	27080012	27080454	8.81225694733121	6.46669403337223	1.52821266010532	4.2315406763654	2.32096009380734e-05	0.000638401396214463	0.5	61	FFPE-ATAC in FFPE liver
peak_10319	chr10	95077717	95078048	8.81519603524599	6.46700894046248	1.52901834135856	4.22951691653117	2.3419366854534e-05	0.000638401396214463	0	46	FFPE-ATAC in FFPE liver
peak_12849	chr11	43032499	43032869	8.81519603524599	6.46700894046248	1.52901834135856	4.22951691653117	2.3419366854534e-05	0.000638401396214463	0	52.5	FFPE-ATAC in FFPE liver
peak_27119	chr14	32661385	32661764	8.81519603524599	6.46700894046248	1.52901834135856	4.22951691653117	2.3419366854534e-05	0.000638401396214463	1	52	FFPE-ATAC in FFPE liver
peak_27420	chr14	42672005	42672231	8.81519603524599	6.46700894046248	1.52901834135856	4.22951691653117	2.3419366854534e-05	0.000638401396214463	0	31.5	FFPE-ATAC in FFPE liver
peak_27456	chr14	44152892	44153154	8.81519603524599	6.46700894046248	1.52901834135856	4.22951691653117	2.3419366854534e-05	0.000638401396214463	0	36.5	FFPE-ATAC in FFPE liver
peak_30804	chr15	36415245	36415534	8.81519603524599	6.46700894046248	1.52901834135856	4.22951691653117	2.3419366854534e-05	0.000638401396214463	0	40.5	FFPE-ATAC in FFPE liver
peak_34255	chr16	10746309	10746797	8.81519603524599	6.46700894046248	1.52901834135856	4.22951691653117	2.3419366854534e-05	0.000638401396214463	1	67.5	FFPE-ATAC in FFPE liver
peak_36372	chr16	64177665	64178029	8.81519603524599	6.46700894046248	1.52901834135856	4.22951691653117	2.3419366854534e-05	0.000638401396214463	0	50.5	FFPE-ATAC in FFPE liver
peak_38352	chr17	25368573	25368984	8.81519603524599	6.46700894046248	1.52901834135856	4.22951691653117	2.3419366854534e-05	0.000638401396214463	1	58	FFPE-ATAC in FFPE liver
peak_41417	chr17	89704131	89704478	8.81519603524599	6.46700894046248	1.52901834135856	4.22951691653117	2.3419366854534e-05	0.000638401396214463	0	48	FFPE-ATAC in FFPE liver
peak_47485	chr1_random	511306	511506	8.81519603524599	6.46700894046248	1.52901834135856	4.22951691653117	2.3419366854534e-05	0.000638401396214463	0	27.5	FFPE-ATAC in FFPE liver
peak_49465	chr2	49651246	49652204	8.81519603524599	6.46700894046248	1.52901834135856	4.22951691653117	2.3419366854534e-05	0.000638401396214463	0	131.5	FFPE-ATAC in FFPE liver
peak_49965	chr2	67372617	67372950	8.81519603524599	6.46700894046248	1.52901834135856	4.22951691653117	2.3419366854534e-05	0.000638401396214463	0	46.5	FFPE-ATAC in FFPE liver
peak_51062	chr2	102958006	102958431	8.81519603524599	6.46700894046248	1.52901834135856	4.22951691653117	2.3419366854534e-05	0.000638401396214463	1	59	FFPE-ATAC in FFPE liver
peak_55012	chr3	25944549	25944936	8.81519603524599	6.46700894046248	1.52901834135856	4.22951691653117	2.3419366854534e-05	0.000638401396214463	1	54	FFPE-ATAC in FFPE liver
peak_56205	chr3	68047491	68047699	8.81519603524599	6.46700894046248	1.52901834135856	4.22951691653117	2.3419366854534e-05	0.000638401396214463	0	28.5	FFPE-ATAC in FFPE liver
peak_60390	chr4	39874984	39875580	8.81519603524599	6.46700894046248	1.52901834135856	4.22951691653117	2.3419366854534e-05	0.000638401396214463	0	82.5	FFPE-ATAC in FFPE liver
peak_62179	chr4	94105163	94105758	8.81519603524599	6.46700894046248	1.52901834135856	4.22951691653117	2.3419366854534e-05	0.000638401396214463	0	83.5	FFPE-ATAC in FFPE liver
peak_66509	chr5	30112401	30112601	8.81519603524599	6.46700894046248	1.52901834135856	4.22951691653117	2.3419366854534e-05	0.000638401396214463	0	27.5	FFPE-ATAC in FFPE liver
peak_73325	chr6	50571138	50571388	8.81519603524599	6.46700894046248	1.52901834135856	4.22951691653117	2.3419366854534e-05	0.000638401396214463	0	34.5	FFPE-ATAC in FFPE liver
peak_75871	chr6	119214632	119215018	8.81519603524599	6.46700894046248	1.52901834135856	4.22951691653117	2.3419366854534e-05	0.000638401396214463	1	54	FFPE-ATAC in FFPE liver
peak_76903	chr6	138475593	138475956	8.81519603524599	6.46700894046248	1.52901834135856	4.22951691653117	2.3419366854534e-05	0.000638401396214463	1	50.5	FFPE-ATAC in FFPE liver
peak_80125	chr7	84145600	84146007	8.81519603524599	6.46700894046248	1.52901834135856	4.22951691653117	2.3419366854534e-05	0.000638401396214463	0	56	FFPE-ATAC in FFPE liver
peak_83501	chr8	11985630	11985846	8.81519603524599	6.46700894046248	1.52901834135856	4.22951691653117	2.3419366854534e-05	0.000638401396214463	0.5	30	FFPE-ATAC in FFPE liver
peak_85126	chr8	64663101	64663301	8.81519603524599	6.46700894046248	1.52901834135856	4.22951691653117	2.3419366854534e-05	0.000638401396214463	0	28	FFPE-ATAC in FFPE liver
peak_95408	chrX	137788984	137789376	8.81519603524599	6.46700894046248	1.52901834135856	4.22951691653117	2.3419366854534e-05	0.000638401396214463	0	54	FFPE-ATAC in FFPE liver
peak_18302	chr12	21788277	21788622	8.81152217535251	6.46661471011892	1.52898199211815	4.22935962846791	2.34357453433339e-05	0.000638401396214463	0	47	FFPE-ATAC in FFPE liver
peak_21538	chr12	114359743	114359949	8.81152217535251	6.46661471011892	1.52898199211815	4.22935962846791	2.34357453433339e-05	0.000638401396214463	0	28	FFPE-ATAC in FFPE liver
peak_27914	chr14	55266619	55266859	8.81152217535251	6.46661471011892	1.52898199211815	4.22935962846791	2.34357453433339e-05	0.000638401396214463	0	32.5	FFPE-ATAC in FFPE liver
peak_35338	chr16	31940314	31940547	8.81152217535251	6.46661471011892	1.52898199211815	4.22935962846791	2.34357453433339e-05	0.000638401396214463	0	32	FFPE-ATAC in FFPE liver
peak_54148	chr2	170325550	170325794	8.81152217535251	6.46661471011892	1.52898199211815	4.22935962846791	2.34357453433339e-05	0.000638401396214463	0	33.5	FFPE-ATAC in FFPE liver
peak_54353	chr2	174967348	174967963	8.81152217535251	6.46661471011892	1.52898199211815	4.22935962846791	2.34357453433339e-05	0.000638401396214463	0	85	FFPE-ATAC in FFPE liver
peak_64529	chr4	136809181	136809526	8.81152217535251	6.46661471011892	1.52898199211815	4.22935962846791	2.34357453433339e-05	0.000638401396214463	0	47	FFPE-ATAC in FFPE liver
peak_88443	chr8_random	135435	135691	8.81152217535251	6.46661471011892	1.52898199211815	4.22935962846791	2.34357453433339e-05	0.000638401396214463	0	35.5	FFPE-ATAC in FFPE liver
peak_10647	chr10	107046688	107047028	8.81593080722469	6.46708946464844	1.53020437474258	4.22629131859355	2.37574386371224e-05	0.000643681242713487	0	47.5	FFPE-ATAC in FFPE liver
peak_24290	chr13	66246054	66246440	8.81593080722469	6.46708946464844	1.53020437474258	4.22629131859355	2.37574386371224e-05	0.000643681242713487	0	53	FFPE-ATAC in FFPE liver
peak_29734	chr14	120373271	120373796	8.81593080722469	6.46708946464844	1.53020437474258	4.22629131859355	2.37574386371224e-05	0.000643681242713487	0	73.5	FFPE-ATAC in FFPE liver
peak_31025	chr15	40002587	40002952	8.81593080722469	6.46708946464844	1.53020437474258	4.22629131859355	2.37574386371224e-05	0.000643681242713487	0	51	FFPE-ATAC in FFPE liver
peak_39870	chr17	49737156	49737366	8.81593080722469	6.46708946464844	1.53020437474258	4.22629131859355	2.37574386371224e-05	0.000643681242713487	0	29.5	FFPE-ATAC in FFPE liver
peak_41304	chr17	87627649	87628096	8.81593080722469	6.46708946464844	1.53020437474258	4.22629131859355	2.37574386371224e-05	0.000643681242713487	1	61.5	FFPE-ATAC in FFPE liver
peak_42149	chr18	24314321	24314696	8.81593080722469	6.46708946464844	1.53020437474258	4.22629131859355	2.37574386371224e-05	0.000643681242713487	0	52.5	FFPE-ATAC in FFPE liver
peak_43736	chr18	66677855	66678246	8.81593080722469	6.46708946464844	1.53020437474258	4.22629131859355	2.37574386371224e-05	0.000643681242713487	0	54	FFPE-ATAC in FFPE liver
peak_65863	chr4_random	144912	145167	8.81593080722469	6.46708946464844	1.53020437474258	4.22629131859355	2.37574386371224e-05	0.000643681242713487	0	35.5	FFPE-ATAC in FFPE liver
peak_79448	chr7	61901820	61902099	8.81593080722469	6.46708946464844	1.53020437474258	4.22629131859355	2.37574386371224e-05	0.000643681242713487	0	39.5	FFPE-ATAC in FFPE liver
peak_80529	chr7	91537921	91538414	8.81593080722469	6.46708946464844	1.53020437474258	4.22629131859355	2.37574386371224e-05	0.000643681242713487	2	69.5	FFPE-ATAC in FFPE liver
peak_83504	chr8	12045258	12045488	8.81593080722469	6.46708946464844	1.53020437474258	4.22629131859355	2.37574386371224e-05	0.000643681242713487	0	32.5	FFPE-ATAC in FFPE liver
peak_83731	chr8	19679660	19680136	8.81593080722469	6.46708946464844	1.53020437474258	4.22629131859355	2.37574386371224e-05	0.000643681242713487	0	67.5	FFPE-ATAC in FFPE liver
peak_85285	chr8	71942754	71943042	8.81593080722469	6.46708946464844	1.53020437474258	4.22629131859355	2.37574386371224e-05	0.000643681242713487	0	40.5	FFPE-ATAC in FFPE liver
peak_95831	chrX	166032115	166032462	8.81593080722469	6.46708946464844	1.53020437474258	4.22629131859355	2.37574386371224e-05	0.000643681242713487	0	47.5	FFPE-ATAC in FFPE liver
peak_87414	chr8	118842488	118842867	8.81078740337381	6.46653419601063	1.53015327927959	4.22606956020453	2.37808507108178e-05	0.000644133967026778	1	51.5	FFPE-ATAC in FFPE liver
peak_21450	chr12	113547870	113548237	14.5541614098001	4.6930673283786	1.11136582250854	4.22279256148579	2.41293882105715e-05	0.000652654789139414	5	80.5	FFPE-ATAC in FFPE liver
peak_3152	chr1	124269191	124269554	8.81666557920339	6.46717162396088	1.53181606248109	4.22189829599122	2.42253420016022e-05	0.00065414549509356	1	50.5	FFPE-ATAC in FFPE liver
peak_5263	chr1	173488129	173488329	8.81666557920339	6.46717162396088	1.53181606248109	4.22189829599122	2.42253420016022e-05	0.00065414549509356	0	28	FFPE-ATAC in FFPE liver
peak_24253	chr13	65476513	65476795	8.81666557920339	6.46717162396088	1.53181606248109	4.22189829599122	2.42253420016022e-05	0.00065414549509356	0	39.5	FFPE-ATAC in FFPE liver
peak_41201	chr17	86695399	86695617	8.81666557920339	6.46717162396088	1.53181606248109	4.22189829599122	2.42253420016022e-05	0.00065414549509356	0	30.5	FFPE-ATAC in FFPE liver
peak_85707	chr8	80074519	80074719	8.81666557920339	6.46717162396088	1.53181606248109	4.22189829599122	2.42253420016022e-05	0.00065414549509356	0	28	FFPE-ATAC in FFPE liver
peak_39616	chr17	46405558	46405836	14.5504875499066	4.69280001832223	1.11191968983852	4.22044870794919	2.43816529399631e-05	0.000657996520875128	3	61	FFPE-ATAC in FFPE liver
peak_11018	chr10	117069893	117070101	8.81740035118209	6.46725586241501	1.53387054823773	4.21629835049982	2.48345152401445e-05	0.000668528454792261	0	29	FFPE-ATAC in FFPE liver
peak_18226	chr12	19249173	19249402	8.81740035118209	6.46725586241501	1.53387054823773	4.21629835049982	2.48345152401445e-05	0.000668528454792261	0	32	FFPE-ATAC in FFPE liver
peak_40623	chr17	73956053	73956592	8.81740035118209	6.46725586241501	1.53387054823773	4.21629835049982	2.48345152401445e-05	0.000668528454792261	1.5	74.5	FFPE-ATAC in FFPE liver
peak_93517	chrUn_random	3658461	3659020	21.2856563084925	6.27806717845818	1.48906151891877	4.21612344331937	2.48537746972811e-05	0.000668859550814369	2	183.5	FFPE-ATAC in FFPE liver
peak_85304	chr8	72095487	72095687	8.80931785941642	6.46636779536556	1.53378700047446	4.21594901597501	2.4872995467815e-05	0.000669189420618129	0	28	FFPE-ATAC in FFPE liver
peak_93614	chrUn_random	5187523	5187894	21.2841867645351	6.27799372859193	1.48913653163367	4.21586173949046	2.48826180814705e-05	0.000669260946785749	1	123	FFPE-ATAC in FFPE liver
peak_95857	chrX	166445618	166445917	21.2926717007593	6.27790485117402	1.48985882330197	4.21375821184207	2.51156152959903e-05	0.000675149891237836	1	99	FFPE-ATAC in FFPE liver
peak_52727	chr2	147801028	147801381	13.6953001600592	3.98627406767642	0.947152178700483	4.20869439707745	2.56850497579763e-05	0.000676575519229464	5.5	71	FFPE-ATAC in FFPE liver
peak_72369	chr6	24906738	24907195	13.6934281716432	3.98722753580284	0.94833403893424	4.2044547301959	2.61712310727301e-05	0.000676575519229464	7	94	FFPE-ATAC in FFPE liver
peak_16	chr1	4247725	4248905	8.58737553849671	6.42933715767691	1.52962426828442	4.20321335832875	2.63152330531664e-05	0.000676575519229464	2	159.5	FFPE-ATAC in FFPE liver
peak_1187	chr1	55245535	55246168	8.58737553849671	6.42933715767691	1.52962426828442	4.20321335832875	2.63152330531664e-05	0.000676575519229464	0	84	FFPE-ATAC in FFPE liver
peak_1198	chr1	55667071	55667606	8.58737553849671	6.42933715767691	1.52962426828442	4.20321335832875	2.63152330531664e-05	0.000676575519229464	1	72	FFPE-ATAC in FFPE liver
peak_3363	chr1	131503625	131503837	8.58737553849671	6.42933715767691	1.52962426828442	4.20321335832875	2.63152330531664e-05	0.000676575519229464	0	28.5	FFPE-ATAC in FFPE liver
peak_4139	chr1	149524651	149525002	8.58737553849671	6.42933715767691	1.52962426828442	4.20321335832875	2.63152330531664e-05	0.000676575519229464	0	47	FFPE-ATAC in FFPE liver
peak_6838	chr10	15880116	15880586	8.58737553849671	6.42933715767691	1.52962426828442	4.20321335832875	2.63152330531664e-05	0.000676575519229464	1	63.5	FFPE-ATAC in FFPE liver
peak_16809	chr11	109738880	109739808	8.58737553849671	6.42933715767691	1.52962426828442	4.20321335832875	2.63152330531664e-05	0.000676575519229464	1	123	FFPE-ATAC in FFPE liver
peak_17999	chr12	12331211	12331411	8.58737553849671	6.42933715767691	1.52962426828442	4.20321335832875	2.63152330531664e-05	0.000676575519229464	0	27.5	FFPE-ATAC in FFPE liver
peak_18052	chr12	14112060	14112432	8.58737553849671	6.42933715767691	1.52962426828442	4.20321335832875	2.63152330531664e-05	0.000676575519229464	0	49	FFPE-ATAC in FFPE liver
peak_18378	chr12	25499199	25499554	8.58737553849671	6.42933715767691	1.52962426828442	4.20321335832875	2.63152330531664e-05	0.000676575519229464	1	48.5	FFPE-ATAC in FFPE liver
peak_19073	chr12	55883513	55883932	8.58737553849671	6.42933715767691	1.52962426828442	4.20321335832875	2.63152330531664e-05	0.000676575519229464	0	57	FFPE-ATAC in FFPE liver
peak_19233	chr12	60578698	60579043	8.58737553849671	6.42933715767691	1.52962426828442	4.20321335832875	2.63152330531664e-05	0.000676575519229464	0	47	FFPE-ATAC in FFPE liver
peak_23429	chr13	47739209	47739628	8.58737553849671	6.42933715767691	1.52962426828442	4.20321335832875	2.63152330531664e-05	0.000676575519229464	0	57.5	FFPE-ATAC in FFPE liver
peak_24318	chr13	66903301	66903501	8.58737553849671	6.42933715767691	1.52962426828442	4.20321335832875	2.63152330531664e-05	0.000676575519229464	0	26.5	FFPE-ATAC in FFPE liver
peak_25424	chr13	105012354	105012933	8.58737553849671	6.42933715767691	1.52962426828442	4.20321335832875	2.63152330531664e-05	0.000676575519229464	2	77.5	FFPE-ATAC in FFPE liver
peak_25672	chr13	111973798	111974077	8.58737553849671	6.42933715767691	1.52962426828442	4.20321335832875	2.63152330531664e-05	0.000676575519229464	0	37.5	FFPE-ATAC in FFPE liver
peak_27423	chr14	42739546	42739867	8.58737553849671	6.42933715767691	1.52962426828442	4.20321335832875	2.63152330531664e-05	0.000676575519229464	0	44	FFPE-ATAC in FFPE liver
peak_28947	chr14	75831554	75831770	8.58737553849671	6.42933715767691	1.52962426828442	4.20321335832875	2.63152330531664e-05	0.000676575519229464	0	29	FFPE-ATAC in FFPE liver
peak_29272	chr14	99585215	99585679	8.58737553849671	6.42933715767691	1.52962426828442	4.20321335832875	2.63152330531664e-05	0.000676575519229464	1	62.5	FFPE-ATAC in FFPE liver
peak_29624	chr14	118340211	118340590	8.58737553849671	6.42933715767691	1.52962426828442	4.20321335832875	2.63152330531664e-05	0.000676575519229464	0	50.5	FFPE-ATAC in FFPE liver
peak_30395	chr15	20513659	20514201	8.58737553849671	6.42933715767691	1.52962426828442	4.20321335832875	2.63152330531664e-05	0.000676575519229464	0	72.5	FFPE-ATAC in FFPE liver
peak_30418	chr15	23580791	23581124	8.58737553849671	6.42933715767691	1.52962426828442	4.20321335832875	2.63152330531664e-05	0.000676575519229464	0	46	FFPE-ATAC in FFPE liver
peak_34209	chr16	9776444	9776793	8.58737553849671	6.42933715767691	1.52962426828442	4.20321335832875	2.63152330531664e-05	0.000676575519229464	0	47.5	FFPE-ATAC in FFPE liver
peak_34318	chr16	11332371	11332794	8.58737553849671	6.42933715767691	1.52962426828442	4.20321335832875	2.63152330531664e-05	0.000676575519229464	1	56.5	FFPE-ATAC in FFPE liver
peak_36457	chr16	71871975	71872378	8.58737553849671	6.42933715767691	1.52962426828442	4.20321335832875	2.63152330531664e-05	0.000676575519229464	0	55.5	FFPE-ATAC in FFPE liver
peak_39380	chr17	42682840	42683211	8.58737553849671	6.42933715767691	1.52962426828442	4.20321335832875	2.63152330531664e-05	0.000676575519229464	0	50.5	FFPE-ATAC in FFPE liver
peak_42192	chr18	25920451	25920788	8.58737553849671	6.42933715767691	1.52962426828442	4.20321335832875	2.63152330531664e-05	0.000676575519229464	0	46	FFPE-ATAC in FFPE liver
peak_44328	chr18	82958747	82958947	8.58737553849671	6.42933715767691	1.52962426828442	4.20321335832875	2.63152330531664e-05	0.000676575519229464	0	27	FFPE-ATAC in FFPE liver
peak_44458	chr18	90366365	90366575	8.58737553849671	6.42933715767691	1.52962426828442	4.20321335832875	2.63152330531664e-05	0.000676575519229464	0	28.5	FFPE-ATAC in FFPE liver
peak_50952	chr2	98027685	98027898	8.58737553849671	6.42933715767691	1.52962426828442	4.20321335832875	2.63152330531664e-05	0.000676575519229464	0	28.5	FFPE-ATAC in FFPE liver
peak_58382	chr3	122607935	122608430	8.58737553849671	6.42933715767691	1.52962426828442	4.20321335832875	2.63152330531664e-05	0.000676575519229464	1	66	FFPE-ATAC in FFPE liver
peak_60367	chr4	36633346	36633596	8.58737553849671	6.42933715767691	1.52962426828442	4.20321335832875	2.63152330531664e-05	0.000676575519229464	0	33.5	FFPE-ATAC in FFPE liver
peak_64504	chr4	136347944	136348152	8.58737553849671	6.42933715767691	1.52962426828442	4.20321335832875	2.63152330531664e-05	0.000676575519229464	0	28	FFPE-ATAC in FFPE liver
peak_64543	chr4	136930487	136930963	8.58737553849671	6.42933715767691	1.52962426828442	4.20321335832875	2.63152330531664e-05	0.000676575519229464	1	65	FFPE-ATAC in FFPE liver
peak_66314	chr5	23729153	23729789	8.58737553849671	6.42933715767691	1.52962426828442	4.20321335832875	2.63152330531664e-05	0.000676575519229464	0	86.5	FFPE-ATAC in FFPE liver
peak_68995	chr5	107008300	107008500	8.58737553849671	6.42933715767691	1.52962426828442	4.20321335832875	2.63152330531664e-05	0.000676575519229464	0	26.5	FFPE-ATAC in FFPE liver
peak_72460	chr6	28980570	28981065	8.58737553849671	6.42933715767691	1.52962426828442	4.20321335832875	2.63152330531664e-05	0.000676575519229464	1.5	67.5	FFPE-ATAC in FFPE liver
peak_74127	chr6	73472357	73472571	8.58737553849671	6.42933715767691	1.52962426828442	4.20321335832875	2.63152330531664e-05	0.000676575519229464	0	28.5	FFPE-ATAC in FFPE liver
peak_78137	chr7	25302495	25302868	8.58737553849671	6.42933715767691	1.52962426828442	4.20321335832875	2.63152330531664e-05	0.000676575519229464	0.5	50.5	FFPE-ATAC in FFPE liver
peak_78940	chr7	46443808	46444162	8.58737553849671	6.42933715767691	1.52962426828442	4.20321335832875	2.63152330531664e-05	0.000676575519229464	0	47	FFPE-ATAC in FFPE liver
peak_81181	chr7	111046282	111046484	8.58737553849671	6.42933715767691	1.52962426828442	4.20321335832875	2.63152330531664e-05	0.000676575519229464	0	27	FFPE-ATAC in FFPE liver
peak_82568	chr7	140498654	140499065	8.58737553849671	6.42933715767691	1.52962426828442	4.20321335832875	2.63152330531664e-05	0.000676575519229464	0	56	FFPE-ATAC in FFPE liver
peak_84517	chr8	40648950	40649389	8.58737553849671	6.42933715767691	1.52962426828442	4.20321335832875	2.63152330531664e-05	0.000676575519229464	2	58.5	FFPE-ATAC in FFPE liver
peak_87251	chr8	114753165	114753646	8.58737553849671	6.42933715767691	1.52962426828442	4.20321335832875	2.63152330531664e-05	0.000676575519229464	0	64.5	FFPE-ATAC in FFPE liver
peak_91683	chr9	84005521	84005791	8.58737553849671	6.42933715767691	1.52962426828442	4.20321335832875	2.63152330531664e-05	0.000676575519229464	0	37	FFPE-ATAC in FFPE liver
peak_93377	chr9	122416019	122416343	8.58737553849671	6.42933715767691	1.52962426828442	4.20321335832875	2.63152330531664e-05	0.000676575519229464	0	43.5	FFPE-ATAC in FFPE liver
peak_94085	chrX	21257557	21257907	8.58737553849671	6.42933715767691	1.52962426828442	4.20321335832875	2.63152330531664e-05	0.000676575519229464	0	47	FFPE-ATAC in FFPE liver
peak_95960	chrY_random	15129175	15129395	8.58737553849671	6.42933715767691	1.52962426828442	4.20321335832875	2.63152330531664e-05	0.000676575519229464	0	29.5	FFPE-ATAC in FFPE liver
peak_95968	chrY_random	16878846	16879047	8.58737553849671	6.42933715767691	1.52962426828442	4.20321335832875	2.63152330531664e-05	0.000676575519229464	0	26.5	FFPE-ATAC in FFPE liver
peak_95977	chrY_random	21523573	21523775	8.58737553849671	6.42933715767691	1.52962426828442	4.20321335832875	2.63152330531664e-05	0.000676575519229464	0	27	FFPE-ATAC in FFPE liver
peak_15	chr1	4246925	4247700	8.5881103104754	6.42941750676461	1.5298325215689	4.20269370412586	2.63757376000274e-05	0.000676575519229464	1	104.5	FFPE-ATAC in FFPE liver
peak_1777	chr1	73546613	73547138	8.5881103104754	6.42941750676461	1.5298325215689	4.20269370412586	2.63757376000274e-05	0.000676575519229464	0	69.5	FFPE-ATAC in FFPE liver
peak_1955	chr1	76064334	76064690	8.5881103104754	6.42941750676461	1.5298325215689	4.20269370412586	2.63757376000274e-05	0.000676575519229464	0	48	FFPE-ATAC in FFPE liver
peak_4473	chr1	157507839	157508191	8.5881103104754	6.42941750676461	1.5298325215689	4.20269370412586	2.63757376000274e-05	0.000676575519229464	0	47.5	FFPE-ATAC in FFPE liver
peak_8031	chr10	49710604	49711046	8.5881103104754	6.42941750676461	1.5298325215689	4.20269370412586	2.63757376000274e-05	0.000676575519229464	0	59	FFPE-ATAC in FFPE liver
peak_8147	chr10	55071201	55071411	8.5881103104754	6.42941750676461	1.5298325215689	4.20269370412586	2.63757376000274e-05	0.000676575519229464	0	28	FFPE-ATAC in FFPE liver
peak_9690	chr10	83753688	83754174	8.5881103104754	6.42941750676461	1.5298325215689	4.20269370412586	2.63757376000274e-05	0.000676575519229464	1	67	FFPE-ATAC in FFPE liver
peak_9859	chr10	86613111	86613784	8.5881103104754	6.42941750676461	1.5298325215689	4.20269370412586	2.63757376000274e-05	0.000676575519229464	0	91	FFPE-ATAC in FFPE liver
peak_10046	chr10	90844467	90844694	8.5881103104754	6.42941750676461	1.5298325215689	4.20269370412586	2.63757376000274e-05	0.000676575519229464	0	30.5	FFPE-ATAC in FFPE liver
peak_12098	chr11	8848296	8848684	8.5881103104754	6.42941750676461	1.5298325215689	4.20269370412586	2.63757376000274e-05	0.000676575519229464	0	52	FFPE-ATAC in FFPE liver
peak_12756	chr11	35559557	35559874	8.5881103104754	6.42941750676461	1.5298325215689	4.20269370412586	2.63757376000274e-05	0.000676575519229464	0	43	FFPE-ATAC in FFPE liver
peak_13517	chr11	57667464	57667823	8.5881103104754	6.42941750676461	1.5298325215689	4.20269370412586	2.63757376000274e-05	0.000676575519229464	0	49.5	FFPE-ATAC in FFPE liver
peak_15135	chr11	85079037	85079319	8.5881103104754	6.42941750676461	1.5298325215689	4.20269370412586	2.63757376000274e-05	0.000676575519229464	0	38.5	FFPE-ATAC in FFPE liver
peak_18686	chr12	34944864	34945227	8.5881103104754	6.42941750676461	1.5298325215689	4.20269370412586	2.63757376000274e-05	0.000676575519229464	0	48.5	FFPE-ATAC in FFPE liver
peak_25976	chr13	117484658	117484980	8.5881103104754	6.42941750676461	1.5298325215689	4.20269370412586	2.63757376000274e-05	0.000676575519229464	0	43	FFPE-ATAC in FFPE liver
peak_27871	chr14	54957032	54957375	8.5881103104754	6.42941750676461	1.5298325215689	4.20269370412586	2.63757376000274e-05	0.000676575519229464	0	47	FFPE-ATAC in FFPE liver
peak_28580	chr14	67449803	67450178	8.5881103104754	6.42941750676461	1.5298325215689	4.20269370412586	2.63757376000274e-05	0.000676575519229464	0	51.5	FFPE-ATAC in FFPE liver
peak_29255	chr14	98943118	98943515	8.5881103104754	6.42941750676461	1.5298325215689	4.20269370412586	2.63757376000274e-05	0.000676575519229464	0	55	FFPE-ATAC in FFPE liver
peak_30603	chr15	30659972	30660357	8.5881103104754	6.42941750676461	1.5298325215689	4.20269370412586	2.63757376000274e-05	0.000676575519229464	0	51	FFPE-ATAC in FFPE liver
peak_30987	chr15	39005919	39006219	8.5881103104754	6.42941750676461	1.5298325215689	4.20269370412586	2.63757376000274e-05	0.000676575519229464	0	40.5	FFPE-ATAC in FFPE liver
peak_34399	chr16	13563127	13563542	8.5881103104754	6.42941750676461	1.5298325215689	4.20269370412586	2.63757376000274e-05	0.000676575519229464	0	56	FFPE-ATAC in FFPE liver
peak_41524	chr18	4734524	4734948	8.5881103104754	6.42941750676461	1.5298325215689	4.20269370412586	2.63757376000274e-05	0.000676575519229464	1	57	FFPE-ATAC in FFPE liver
peak_42203	chr18	26622529	26622976	8.5881103104754	6.42941750676461	1.5298325215689	4.20269370412586	2.63757376000274e-05	0.000676575519229464	0	61	FFPE-ATAC in FFPE liver
peak_45616	chr19	28217794	28218276	8.5881103104754	6.42941750676461	1.5298325215689	4.20269370412586	2.63757376000274e-05	0.000676575519229464	0	66.5	FFPE-ATAC in FFPE liver
peak_45774	chr19	30586589	30586791	8.5881103104754	6.42941750676461	1.5298325215689	4.20269370412586	2.63757376000274e-05	0.000676575519229464	0	27	FFPE-ATAC in FFPE liver
peak_46971	chr19	52399094	52399613	8.5881103104754	6.42941750676461	1.5298325215689	4.20269370412586	2.63757376000274e-05	0.000676575519229464	0	70	FFPE-ATAC in FFPE liver
peak_47372	chr19	59061808	59062323	8.5881103104754	6.42941750676461	1.5298325215689	4.20269370412586	2.63757376000274e-05	0.000676575519229464	0	70	FFPE-ATAC in FFPE liver
peak_48524	chr2	27632667	27632893	8.5881103104754	6.42941750676461	1.5298325215689	4.20269370412586	2.63757376000274e-05	0.000676575519229464	0	30	FFPE-ATAC in FFPE liver
peak_48832	chr2	31751485	31751687	8.5881103104754	6.42941750676461	1.5298325215689	4.20269370412586	2.63757376000274e-05	0.000676575519229464	0	27	FFPE-ATAC in FFPE liver
[truncated: 13,081 more rows]

## Sheet: EEADME
Supplemental Table S5: List of differential accessible chromatin peaks between standard ATAC-Seq on FFPE mouse liver and FFPE-ATAC on FFPE mouse liver.
