# Supplementary material for: Profiling chromatin accessibility in formalin-fixed paraffin-embedded samples
Source: HighWire-hosted journal article supplement (doi:10.1101/gr.275269.121), 2021-07-14
Supplement: Supplemental_Table_S6.xlsx [file Supplemental_Table_S6.xlsx]

## Sheet: Supplemental_Table_S6
	chr	start	end	baseMean	log2FoldChange	lfcSE	stat	pvalue	padj	readcounts (FFPE-ATAC in frozen kidney)	readcounts (standard ATAC-Seq on frozen kidney)	Group
peak_57682	chr2	102498814	102499329	65.2342926535042	-5.35368387395728	0.609170580091665	-8.78848067999555	1.51596100422787e-18	1.61754555112118e-13	23	691	standard ATAC-Seq on frozen kidney
peak_61888	chr3	14610875	14611826	69.2233229167277	-3.17576401987358	0.373331379730449	-8.50655528117281	1.79177191687914e-17	9.55919276514604e-13	172	1248.5	standard ATAC-Seq on frozen kidney
peak_57681	chr2	102497872	102498137	57.5504873571031	-5.39633842684399	0.649871930278548	-8.30369519811545	1.00922351247611e-16	3.58950526682377e-12	9	315	standard ATAC-Seq on frozen kidney
peak_106450	chrY_random	17063899	17064404	41.3186767671201	-3.40724098742842	0.459067511640814	-7.42209130689765	1.15285288217726e-13	9.4623504139381e-10	49	402	standard ATAC-Seq on frozen kidney
peak_105936	chrX	139917405	139917805	206.536081649362	-3.90739869671247	0.554930015462614	-7.04124590099005	1.90528416419564e-12	5.64710348899552e-09	138.5	1640	standard ATAC-Seq on frozen kidney
peak_106500	chrY_random	17274106	17274309	35.6750596329402	-3.38568667584887	0.482115542314523	-7.02256280640733	2.17835027797999e-12	6.0319368742597e-09	17.5	139	standard ATAC-Seq on frozen kidney
peak_93869	chr8	19919140	19919652	31.6511369247717	-3.57736893868281	0.529185502714519	-6.76014161448543	1.37856927204025e-11	2.07175661825306e-08	33.5	316.5	standard ATAC-Seq on frozen kidney
peak_106447	chrY_random	17057110	17057801	34.7183172791495	-3.1298159469618	0.463987121791404	-6.74548020832543	1.52521726464155e-11	2.26030843547942e-08	66	454	standard ATAC-Seq on frozen kidney
peak_106506	chrY_random	17291990	17292312	32.921734067086	-3.25805935286716	0.484672608535835	-6.72218585388918	1.7901840378349e-11	2.51334772396082e-08	27	201.5	standard ATAC-Seq on frozen kidney
peak_19636	chr12	3109727	3110238	497.968438676455	-4.15429773861705	0.632246583560231	-6.57069226886742	5.00818685459604e-11	6.00425332103654e-08	358.5	5097.5	standard ATAC-Seq on frozen kidney
peak_98797	chr8_random	674672	676414	31.1848847337278	-3.06093089363272	0.476330484613771	-6.42606549970165	1.30948996059698e-10	1.12557583986947e-07	160	1021.5	standard ATAC-Seq on frozen kidney
peak_93870	chr8	19920610	19920954	30.395361227144	-3.13106613808828	0.489635514949773	-6.39468756348173	1.60875962795435e-10	1.27152785972117e-07	29	197.5	standard ATAC-Seq on frozen kidney
peak_106507	chrY_random	17293668	17293870	28.0671162694555	-3.38857921759095	0.531880074099809	-6.37094597560553	1.87865814700381e-10	1.43181930673895e-07	13.5	110	standard ATAC-Seq on frozen kidney
peak_57680	chr2	102492016	102492595	45.3819294255362	-6.65817393259185	1.05710619204856	-6.29849109074749	3.0055699750454e-10	1.98991245012428e-07	8	550	standard ATAC-Seq on frozen kidney
peak_57684	chr2	102500699	102500901	46.9325543735272	-9.16297675894755	1.4690103122532	-6.23751697487621	4.44570879393183e-10	2.71539532406622e-07	0.5	200	standard ATAC-Seq on frozen kidney
peak_57683	chr2	102499919	102500394	43.7115659619288	-6.60362175645329	1.05874057397201	-6.23724254911559	4.45351197937777e-10	2.71539532406622e-07	5.5	433.5	standard ATAC-Seq on frozen kidney
peak_73565	chr4	146777628	146777870	27.1811248065909	-3.19936448073895	0.519858420788655	-6.15429961851023	7.54100016514359e-10	4.06379928596458e-07	17.5	125	standard ATAC-Seq on frozen kidney
peak_73570	chr4	146797790	146798194	28.1723272160652	-3.00890964789733	0.495533173788919	-6.07206501411553	1.26275785937502e-09	6.26887847722812e-07	33	213.5	standard ATAC-Seq on frozen kidney
peak_57678	chr2	102489452	102490425	38.2087366090627	-6.40736174534784	1.05985643632456	-6.04549967877509	1.48947647342976e-09	7.2240285996104e-07	11.5	770.5	standard ATAC-Seq on frozen kidney
peak_106510	chrY_random	17309456	17309696	25.0554857003094	-3.20773472643422	0.53263815812543	-6.02235246855679	1.71900037048395e-09	7.97474167526121e-07	16	114.5	standard ATAC-Seq on frozen kidney
peak_57558	chr2	98505093	98505443	655.698456756543	-4.03886395339156	0.674167962403389	-5.99088680956171	2.08699861437887e-09	9.35650584675797e-07	351.5	4578	standard ATAC-Seq on frozen kidney
peak_99867	chr9	35112678	35113315	310.32674595049	-3.15235504632755	0.531007421363548	-5.93655553482242	2.91072350681984e-09	1.22274452323301e-06	530.5	3753.5	standard ATAC-Seq on frozen kidney
peak_106528	chrY_random	17366081	17366290	25.5248861335081	-3.09867241686098	0.522932570346347	-5.92556783144847	3.11220082932773e-09	1.28711217321744e-06	14.5	101	standard ATAC-Seq on frozen kidney
peak_84639	chr6	103598905	103599436	360.836346084385	-3.85245907675033	0.652690746288185	-5.90242637674741	3.58193980688892e-09	1.42610656468229e-06	328.5	3796	standard ATAC-Seq on frozen kidney
peak_98806	chr8_random	698707	698912	22.7164944886058	-3.55694002417198	0.602995500797806	-5.89878368821309	3.66190930783403e-09	1.44714587057481e-06	9.5	90.5	standard ATAC-Seq on frozen kidney
peak_95346	chr8	67404692	67405255	22.7071184254402	-3.36962627514099	0.576026435225466	-5.84977714403344	4.92232073945382e-09	1.83642148678483e-06	31.5	248	standard ATAC-Seq on frozen kidney
peak_82227	chr6	47713892	47714572	26.7334445774619	3.28829345053119	0.563480430500428	5.83568349944443	5.35705018483977e-09	1.96110186489393e-06	440	36	FFPE-ATAC in frozen kidney
peak_106541	chrY_random	17394138	17394405	21.9128866553481	-3.49966756302445	0.602454872919827	-5.8090119614489	6.28426000123894e-09	2.16012819641337e-06	13.5	112.5	standard ATAC-Seq on frozen kidney
peak_82229	chr6	47718376	47718766	26.0657033140315	3.24802170361347	0.564296917523301	5.75587355300298	8.6194888951495e-09	2.75361701976451e-06	246	22	FFPE-ATAC in frozen kidney
peak_82231	chr6	47722657	47723275	25.1255322567847	3.37636339999273	0.590354385684291	5.71921456309523	1.07017587072313e-08	3.30982132121821e-06	379.5	31	FFPE-ATAC in frozen kidney
peak_23990	chr12	116845023	116845329	21.5473269779096	-3.28810724249159	0.586549822159601	-5.60584475225856	2.07241663342716e-08	5.47348829711167e-06	17	125.5	standard ATAC-Seq on frozen kidney
peak_57559	chr2	98506326	98507553	1187.64322457388	-4.43399917979367	0.792970814047049	-5.59162973119283	2.24948125280799e-08	5.81166826043257e-06	1716	29481	standard ATAC-Seq on frozen kidney
peak_98831	chr8_random	842509	842713	19.8022183604063	-3.79047180691805	0.678966695335059	-5.58270653474028	2.36804135130951e-08	6.03036706983474e-06	8	78.5	standard ATAC-Seq on frozen kidney
peak_57556	chr2	98502323	98503143	819.245711123155	-4.00404339895491	0.718851951654367	-5.57005290135194	2.54662001258749e-08	6.40865334818628e-06	1047.5	13384.5	standard ATAC-Seq on frozen kidney
peak_23991	chr12	116852597	116852857	20.7634386833505	-3.227715126755	0.58212365014194	-5.54472426256514	2.94417763075918e-08	7.23840316542937e-06	13.5	103.5	standard ATAC-Seq on frozen kidney
peak_106468	chrY_random	17105251	17105673	19.4727192238555	-3.52436561367151	0.642899067686767	-5.48198899455964	4.2057040173917e-08	9.60926818757414e-06	19	159	standard ATAC-Seq on frozen kidney
peak_57536	chr2	94569924	94570338	18.9869777884677	-3.72499989251598	0.681305928657884	-5.46744088937244	4.56579393923172e-08	1.01919409855641e-05	15	154	standard ATAC-Seq on frozen kidney
peak_106526	chrY_random	17361640	17362033	20.707255825282	-3.05424956485826	0.562278967888472	-5.43191145193975	5.57535884234239e-08	1.20913895088776e-05	23.5	152	standard ATAC-Seq on frozen kidney
peak_37910	chr15	101026638	101027224	21.6874226891753	3.59636564281723	0.667334074428489	5.38915332009263	7.07903947930077e-08	1.459723821155e-05	314.5	19	FFPE-ATAC in frozen kidney
peak_45208	chr17	58659320	58660173	19.6542758095652	-3.14006482511194	0.587523830211459	-5.34457440472123	9.06297430660565e-08	1.79079337312802e-05	48	317.5	standard ATAC-Seq on frozen kidney
peak_73569	chr4	146794271	146794649	20.1713695223326	-3.01117071275059	0.566359619904727	-5.31671151495075	1.05659384547273e-07	2.00247992727861e-05	23	143.5	standard ATAC-Seq on frozen kidney
peak_50534	chr19	6283096	6283318	21.5110176093067	3.34222969628877	0.630149822174525	5.3038651740873	1.13376063510559e-07	2.12147774590229e-05	115.5	10	FFPE-ATAC in frozen kidney
peak_105481	chrX	97048547	97049124	18.8750553146636	-3.26390988705809	0.615809376073336	-5.30019518031729	1.15678947819979e-07	2.15035878246334e-05	29	208.5	standard ATAC-Seq on frozen kidney
peak_71396	chr4	116325846	116326130	21.287846198386	3.32571086968243	0.630107550380372	5.27800510829432	1.30597825543103e-07	2.38203736466233e-05	146	12	FFPE-ATAC in frozen kidney
peak_87035	chr7	12595726	12596304	17.6452269767453	-3.89415410904527	0.739166437419957	-5.26830482541621	1.37689331300365e-07	2.46160425399785e-05	16	200.5	standard ATAC-Seq on frozen kidney
peak_106473	chrY_random	17178924	17179173	18.1164408431264	-3.40996261208138	0.649465256974092	-5.25041574659228	1.5175630515118e-07	2.65887512576947e-05	10	86	standard ATAC-Seq on frozen kidney
peak_30989	chr14	44502605	44503349	17.6002336150248	-3.60717101464782	0.690388917843871	-5.22483910360735	1.743066099089e-07	2.97103667474274e-05	26.5	254	standard ATAC-Seq on frozen kidney
peak_84625	chr6	102514111	102514784	18.8244672047691	-3.07061888286755	0.592384003360473	-5.18349392530615	2.1776732457087e-07	3.54747958763915e-05	36	237.5	standard ATAC-Seq on frozen kidney
peak_106540	chrY_random	17390237	17390535	17.2960487653467	-3.33643687672665	0.655872931193964	-5.08701719196268	3.63738872919275e-07	5.39510238142833e-05	13	99.5	standard ATAC-Seq on frozen kidney
peak_53452	chr1_random	813065	813419	16.7592355138807	-3.53119475059042	0.698306663729127	-5.05679658236824	4.26357589614342e-07	6.08192261623528e-05	12	116	standard ATAC-Seq on frozen kidney
peak_102904	chr9	100999550	101000288	20.4484081185953	3.04788873537007	0.603525753057402	5.05013865593932	4.41489490030888e-07	6.26427793560981e-05	358	33.5	FFPE-ATAC in frozen kidney
peak_80091	chr5	140914459	140915718	19.7339005241128	3.20417439055535	0.63575818377133	5.039926299569	4.65711155636553e-07	6.56431255185943e-05	604.5	51.5	FFPE-ATAC in frozen kidney
peak_67502	chr4	5057777	5058433	16.0769666814435	-4.09227719930216	0.815233188977659	-5.01976275577552	5.17353348377358e-07	7.10575932476198e-05	15.5	208	standard ATAC-Seq on frozen kidney
peak_57685	chr2	102501638	102501971	37.2025633882488	-7.37655281648793	1.47055841426324	-5.01615763436616	5.27150831105165e-07	7.19277759971256e-05	1.5	259.5	standard ATAC-Seq on frozen kidney
peak_106552	chrY_random	17423966	17424209	16.0353113923818	-4.0900214666047	0.819142474072045	-4.99305260814126	5.94323601980304e-07	7.94673216226823e-05	7	77	standard ATAC-Seq on frozen kidney
peak_57679	chr2	102490567	102491648	36.3310994943909	-7.342698460216	1.47133424728597	-4.99050332972292	6.02221624247855e-07	7.9922449662774e-05	8.5	824.5	standard ATAC-Seq on frozen kidney
peak_106446	chrY_random	17049929	17050978	16.7189504156684	-3.28347900390844	0.659796582947212	-4.97650198375025	6.47436131362586e-07	8.50840396122513e-05	46.5	335	standard ATAC-Seq on frozen kidney
peak_26469	chr13	54660554	54660785	18.7881347186919	3.37166718673829	0.677614406002665	4.97579029735833	6.49819670880549e-07	8.52846355505848e-05	105	7.5	FFPE-ATAC in frozen kidney
peak_101166	chr9	61870319	61870554	18.7984377303741	3.370653936647	0.679590635352543	4.95982987596415	7.05549413604329e-07	9.07022023867415e-05	107	9	FFPE-ATAC in frozen kidney
peak_4262	chr1	134245809	134246401	18.2916470292889	3.61554878650357	0.729645023197236	4.95521612778303	7.22499340837898e-07	9.24357340128831e-05	267.5	18.5	FFPE-ATAC in frozen kidney
peak_30978	chr14	44036085	44036372	16.133149539512	-4.53341156849568	0.915448532250461	-4.95212063681082	7.34090699874675e-07	9.36940332145067e-05	5	92	standard ATAC-Seq on frozen kidney
peak_106546	chrY_random	17406471	17406828	15.8289242259831	-4.50584203884339	0.916672770105701	-4.91543131397241	8.8587206162249e-07	0.000108026782682493	7	113.5	standard ATAC-Seq on frozen kidney
peak_68287	chr4	34882917	34883230	16.4353311255039	-3.25655534946286	0.663640163225896	-4.90711010260898	9.24281520925583e-07	0.000111689425327611	13	98.5	standard ATAC-Seq on frozen kidney
peak_92317	chr7	137735269	137735476	18.1814975248164	4.39061730021765	0.90020733450418	4.87734006592596	1.07525967916314e-06	0.000125389380356706	96	3	FFPE-ATAC in frozen kidney
peak_29105	chr13	118391039	118391567	15.6818681598078	-3.42561399985197	0.704159872496517	-4.86482421627755	1.14558576120878e-06	0.000131435641190041	18.5	160.5	standard ATAC-Seq on frozen kidney
peak_16745	chr11	82667770	82667977	17.6218569563478	3.55813936134566	0.735029812685003	4.84080958342094	1.29311234696158e-06	0.000146316416259966	90	6.5	FFPE-ATAC in frozen kidney
peak_14856	chr11	52215637	52215967	17.4020640819366	3.53755397266344	0.734253678816483	4.81789070279566	1.45083803265671e-06	0.000161088313134759	141.5	10	FFPE-ATAC in frozen kidney
peak_93880	chr8	19949211	19949497	15.4081086389926	-3.39781649440581	0.705914068550932	-4.81335710078805	1.48415737887615e-06	0.000164104742469911	9.5	84.5	standard ATAC-Seq on frozen kidney
peak_24584	chr13	12956192	12956392	15.1549146776911	-3.65892882773096	0.760436683660518	-4.81161536042417	1.49715277264226e-06	0.000164688348447116	5.5	59.5	standard ATAC-Seq on frozen kidney
peak_83628	chr6	84836538	84837159	15.4085518813255	-3.39775097619417	0.706692491342343	-4.80796246998498	1.52476380904348e-06	0.00016652387225051	24	184.5	standard ATAC-Seq on frozen kidney
peak_34058	chr15	9152104	9152663	15.3982488696433	-3.39713974191385	0.706973520027663	-4.80518668051517	1.54607179495752e-06	0.000168162493979371	18.5	167.5	standard ATAC-Seq on frozen kidney
peak_33429	chr14	119201051	119202010	18.1783492826616	3.0721521053418	0.645151208549866	4.76191017644872	1.91769042273294e-06	0.000200410857782593	415.5	39	FFPE-ATAC in frozen kidney
peak_46994	chr18	11288487	11288920	16.4467509162066	-5.16817990305648	1.08563167599974	-4.76052791873189	1.93087220453604e-06	0.000201000970825561	5	146.5	standard ATAC-Seq on frozen kidney
peak_106534	chrY_random	17376692	17376985	16.1264380123175	-3.01064041441939	0.63539459060059	-4.73822166407438	2.15601902571582e-06	0.000217450837304236	14	88.5	standard ATAC-Seq on frozen kidney
peak_75138	chr5	26425505	26425763	16.3692884980861	-3.03611963901345	0.641318318412085	-4.73418511813436	2.19936924819047e-06	0.000220352017043354	12	80.5	standard ATAC-Seq on frozen kidney
peak_67767	chr4	11766461	11767075	14.6494941674554	-3.60408647081417	0.762760823136111	-4.72505451446219	2.30053633171774e-06	0.00022770828119723	20.5	173.5	standard ATAC-Seq on frozen kidney
peak_73509	chr4	145720491	145720771	16.1058319889531	-3.0094555432058	0.638214923778674	-4.7154264669772	2.41204994841693e-06	0.000235901137989032	13.5	85	standard ATAC-Seq on frozen kidney
peak_89424	chr7	79306980	79307525	14.8511730703459	-3.33979048308453	0.711061731480663	-4.69690652052108	2.6413125816431e-06	0.000252989850784471	18.5	155.5	standard ATAC-Seq on frozen kidney
peak_25427	chr13	34800755	34801295	15.3622287926063	-3.14735445078701	0.6717560286799	-4.68526416796293	2.79599073322093e-06	0.00026518667308925	23	157.5	standard ATAC-Seq on frozen kidney
peak_104385	chrUn_random	5727467	5727699	14.5834515400376	-3.31045820235576	0.714932544696793	-4.63044832258929	3.64874842280414e-06	0.00032854439279462	8	64	standard ATAC-Seq on frozen kidney
peak_93879	chr8	19941435	19941637	14.0874070929676	-3.5433315776	0.766249462773379	-4.6242532618231	3.7595029730331e-06	0.000336555502980368	6	54.5	standard ATAC-Seq on frozen kidney
peak_84622	chr6	101871175	101871663	15.0631549849185	-3.11679843205632	0.674760146939372	-4.61912050703309	3.85370005809595e-06	0.000343233430633469	21	140	standard ATAC-Seq on frozen kidney
peak_70658	chr4	101718337	101718823	14.7898387064362	-3.08719685790896	0.677184080473876	-4.55887394126073	5.1428627718084e-06	0.000429045035664369	21	137	standard ATAC-Seq on frozen kidney
peak_53450	chr1_random	807816	808034	13.6011819513961	-4.27746406935589	0.940520383774745	-4.54797593241779	5.41643279815896e-06	0.000444149015533602	3.5	59.5	standard ATAC-Seq on frozen kidney
peak_91395	chr7	121105567	121106022	13.3531799597864	-4.2484931937546	0.935589178819555	-4.54098154396674	5.59929336649768e-06	0.000455026809976138	9.5	120	standard ATAC-Seq on frozen kidney
peak_106458	chrY_random	17079885	17080101	13.3690777196427	-4.2494657965405	0.93623807241307	-4.53887309409228	5.65556585899015e-06	0.000458203897281783	4.5	58	standard ATAC-Seq on frozen kidney
peak_749	chr1	34286996	34287787	16.3394545912251	3.14920270789531	0.693883575545146	4.53851743849269	5.66511116498898e-06	0.000458629003350143	311	30	FFPE-ATAC in frozen kidney
peak_9659	chr10	66470906	66471201	14.0359324984073	-3.24956506163363	0.721665572848669	-4.50286834219685	6.70424192782221e-06	0.000524065434388687	9.5	78	standard ATAC-Seq on frozen kidney
peak_17666	chr11	97229935	97230161	15.400613260977	3.34493114172974	0.748432215763037	4.46925061652983	7.84941174735187e-06	0.000592738912140263	85	7.5	FFPE-ATAC in frozen kidney
peak_2508	chr1	79746732	79747003	15.8962144657141	3.10491707444285	0.696353152578249	4.45882532870985	8.24100425769032e-06	0.000615341774177617	103	11	FFPE-ATAC in frozen kidney
peak_73475	chr4	145024480	145024738	13.2412574859823	-3.44702129683423	0.775656572814632	-4.44400449586342	8.82997579304259e-06	0.000650667988324197	8	66	standard ATAC-Seq on frozen kidney
peak_106491	chrY_random	17251048	17251328	13.7630594622579	-3.21797254082933	0.724385475634797	-4.44234823732398	8.89823923741458e-06	0.000654793810256119	10	72.5	standard ATAC-Seq on frozen kidney
peak_55447	chr2	38513965	38514385	14.2488008976457	-3.02637382665591	0.682463468269686	-4.43448472682202	9.22927621518085e-06	0.000673118934679434	18	112	standard ATAC-Seq on frozen kidney
peak_44312	chr17	38725822	38726027	9.38548057353722	-6.84088969750845	1.54750459148732	-4.4205941198104	9.84299016782361e-06	0.000706767761707232	0.5	40	standard ATAC-Seq on frozen kidney
peak_67766	chr4	11755676	11756127	12.7503645447534	-3.73636869713101	0.845493410135704	-4.41915768040263	9.90863354604378e-06	0.000710524938169636	11.5	112.5	standard ATAC-Seq on frozen kidney
peak_30969	chr14	43953693	43954024	12.9683844498329	-3.41394047655207	0.778555718694842	-4.38496615537696	1.1600381303014e-05	0.000808473079956169	10.5	83	standard ATAC-Seq on frozen kidney
peak_105962	chrX	145314421	145314633	12.507916837467	-4.14971589305044	0.948094664645507	-4.3769003748186	1.20378962514207e-05	0.000827613123661625	4.5	52	standard ATAC-Seq on frozen kidney
peak_106573	chrY_random	17592537	17592738	12.8369727316849	-4.8003868021993	1.11248855062181	-4.31499883708122	1.59603743484693e-05	0.00103211388082183	2	51.5	standard ATAC-Seq on frozen kidney
peak_68906	chr4	49385259	49386176	12.2093267359628	-3.66835040159235	0.851653910937715	-4.30732525792467	1.65240541725273e-05	0.00106021232968301	25	217.5	standard ATAC-Seq on frozen kidney
peak_98804	chr8_random	692964	693380	13.1859611125796	-3.15049771394657	0.732022814880474	-4.30382448457018	1.67874675504718e-05	0.00107388463735186	15.5	105.5	standard ATAC-Seq on frozen kidney
peak_69647	chr4	70370229	70370691	12.7203824582233	-3.38219111835778	0.785949173411421	-4.30332040897421	1.68257243939357e-05	0.00107568700932135	14	112.5	standard ATAC-Seq on frozen kidney
peak_51634	chr19	28575154	28575385	14.0051260972053	3.54867650863259	0.828378350345295	4.28388369535899	1.83658943828504e-05	0.00115682366974293	79.5	5.5	FFPE-ATAC in frozen kidney
peak_83689	chr6	85658535	85659814	15.0061882760289	3.01180853757201	0.704109136643098	4.27747401763748	1.89026012730577e-05	0.00118156207289779	461.5	39	FFPE-ATAC in frozen kidney
peak_76000	chr5	48853470	48853697	8.2716094362437	-6.65918251251911	1.55943563492129	-4.27025159833239	1.95252578100341e-05	0.00120914946813026	0.5	39	standard ATAC-Seq on frozen kidney
peak_60724	chr2	165654835	165655253	15.0070747606947	3.01186840658962	0.70534259605792	4.27007871553854	1.95403990566938e-05	0.00120938522027163	147.5	14.5	FFPE-ATAC in frozen kidney
peak_84232	chr6	92994084	92994290	8.28706395376702	-6.66099124016649	1.56054578415922	-4.26837283966984	1.9690402103923e-05	0.00121748094052854	0.5	36	standard ATAC-Seq on frozen kidney
peak_30976	chr14	44016280	44016491	8.26645793040259	-6.65857712250622	1.560438576011	-4.26711901696751	1.98013532218232e-05	0.00122085779194303	0.5	36.5	standard ATAC-Seq on frozen kidney
peak_64774	chr3	95670113	95670436	14.2883021450369	3.22561920180487	0.75868871207821	4.25157136313418	2.12275846463581e-05	0.00129133666439627	111.5	10	FFPE-ATAC in frozen kidney
peak_101261	chr9	62982596	62982888	14.2883021450369	3.22561920180487	0.75868871207821	4.25157136313418	2.12275846463581e-05	0.00129133666439627	100.5	8.5	FFPE-ATAC in frozen kidney
peak_67813	chr4	13175146	13175455	11.9205559399572	-3.63172563706921	0.85495834227215	-4.24783928935939	2.15842134506755e-05	0.00130706989750314	8	71	standard ATAC-Seq on frozen kidney
peak_21204	chr12	54011942	54012207	12.9177963399384	-3.11709802083615	0.73428821880978	-4.24506064647028	2.18534306964505e-05	0.00131888173571378	9	64	standard ATAC-Seq on frozen kidney
peak_23943	chr12	116365292	116365492	11.9360104574806	-3.6329489499976	0.85586263284806	-4.24478042452702	2.18807575741606e-05	0.00131978446236321	4.5	46	standard ATAC-Seq on frozen kidney
peak_106495	chrY_random	17259300	17259571	12.4170436293602	-3.34509911196359	0.78828434379315	-4.24351839320732	2.20042328343042e-05	0.0013249851284724	6.5	65	standard ATAC-Seq on frozen kidney
peak_106465	chrY_random	17096874	17097257	12.9070500859233	-3.11641846029764	0.735246725569306	-4.23860229759552	2.24915691759773e-05	0.00134522024811993	14	95.5	standard ATAC-Seq on frozen kidney
peak_68905	chr4	49384728	49384981	11.9416052056546	-3.63327415625569	0.858703369960227	-4.23111668517613	2.32533996989103e-05	0.00137765741325565	5.5	58	standard ATAC-Seq on frozen kidney
peak_42251	chr17	5843102	5843526	9.3457182340282	6.52484739602344	1.54348960759933	4.22733484171096	2.36475631088088e-05	0.00139096947699725	105	1.5	FFPE-ATAC in frozen kidney
peak_83695	chr6	85753465	85753902	13.289732018057	3.91177675248609	0.931670868815558	4.19866809558956	2.6848951034481e-05	0.00152627060433146	147	9	FFPE-ATAC in frozen kidney
peak_106622	chrY_random	40714901	40715106	12.3964376059958	-3.34343779493612	0.796410154886485	-4.19813556422151	2.69121518347218e-05	0.00152823497228135	5.5	48.5	standard ATAC-Seq on frozen kidney
peak_23339	chr12	106674216	106674558	11.8947984107517	-3.62959920411299	0.864707306567598	-4.19748876474799	2.69891042344737e-05	0.00153178958027797	8.5	80.5	standard ATAC-Seq on frozen kidney
peak_106582	chrY_random	17655005	17655329	11.647239661475	-3.59539749548935	0.858748237390282	-4.18678879203955	2.82928877205455e-05	0.00158056513752352	9	75	standard ATAC-Seq on frozen kidney
peak_67574	chr4	8040722	8041110	12.6440368191233	-3.08259942025298	0.736693152211408	-4.1843736581501	2.85953428247043e-05	0.00159079857911302	14	93	standard ATAC-Seq on frozen kidney
peak_30890	chr14	40969053	40969286	7.72497687927915	-6.56024848576551	1.5688768478783	-4.18149359182488	2.89600414669462e-05	0.00160514525728474	0.5	38	standard ATAC-Seq on frozen kidney
peak_30870	chr14	38065412	38065623	7.71467386759694	-6.55894731997743	1.57046790132023	-4.17642876652467	2.96121416333165e-05	0.00162449620792622	1	34.5	standard ATAC-Seq on frozen kidney
peak_63396	chr3	61906734	61907471	12.6594913366466	-3.08376697275794	0.738543272771566	-4.17547229316076	2.9736844779219e-05	0.00162882498705721	26	174	standard ATAC-Seq on frozen kidney
peak_106431	chrY_random	16882967	16883329	12.639328555615	-3.08212525930863	0.73839240119987	-4.17410208217236	2.99163602142892e-05	0.00163697720575634	13.5	87	standard ATAC-Seq on frozen kidney
peak_2418	chr1	77203203	77203424	11.1357406968816	-3.97189553496261	0.965331730078509	-4.11453950098541	3.87953122951366e-05	0.00198632371266956	4.5	48.5	standard ATAC-Seq on frozen kidney
peak_74581	chr5	9627190	9627749	12.3810235523232	-3.04796751372289	0.741821138291833	-4.10876336139644	3.97783408212228e-05	0.00201729503040175	23	128	standard ATAC-Seq on frozen kidney
peak_24187	chr12	120641202	120641690	12.3604175289588	-3.04637160485714	0.741648325167402	-4.10756891302832	3.99845497981836e-05	0.00202195898122332	18.5	114	standard ATAC-Seq on frozen kidney
peak_536	chr1	22812615	22813230	12.365125792467	-3.04685583763773	0.742036261137967	-4.10607405218331	4.0244051292188e-05	0.00202742234038138	21.5	141	standard ATAC-Seq on frozen kidney
peak_56777	chr2	75040533	75041147	11.3533173596283	-3.55637493252704	0.868328991064876	-4.09565380071633	4.2097863520219e-05	0.00209295173177416	13.5	136.5	standard ATAC-Seq on frozen kidney
peak_30981	chr14	44085458	44085762	11.186772049109	-4.59407951417475	1.13008585832359	-4.06524821130826	4.79813700122992e-05	0.00230200546838235	3.5	67.5	standard ATAC-Seq on frozen kidney
peak_106632	chrY_random	40781325	40781593	11.6013598150887	-3.23667808872106	0.797839620800995	-4.05680290165533	4.97490304684712e-05	0.00236028070254173	8	59.5	standard ATAC-Seq on frozen kidney
peak_8030	chr10	21860770	21860982	12.3398115055943	-3.04468935048828	0.751480646115082	-4.05158717823056	5.08713645422525e-05	0.0024017811805411	7.5	49.5	standard ATAC-Seq on frozen kidney
peak_99746	chr9	32163523	32164050	8.0106789495003	6.30246317099087	1.5586824872448	4.04345543275553	5.26691714629621e-05	0.00245730356985987	112.5	2	FFPE-ATAC in frozen kidney
peak_103744	chr9	115669618	115670034	11.1001638621775	-3.51999085033134	0.870839412874475	-4.04206653751754	5.29821926521849e-05	0.00246329104060165	12	89.5	standard ATAC-Seq on frozen kidney
peak_44070	chr17	35094966	35095205	12.6678706010129	3.39105682092604	0.841651672572079	4.02905017768574	5.60026649744088e-05	0.00256241010095814	74	6.5	FFPE-ATAC in frozen kidney
peak_53476	chr1_random	1134947	1135152	12.0815065023025	-3.00970014410069	0.747851287416656	-4.02446341236806	5.71053709890537e-05	0.00259727203320674	7.5	46	standard ATAC-Seq on frozen kidney
peak_61960	chr3	16528424	16528669	11.0748495753049	-3.51760112000868	0.875759416194052	-4.01662951600997	5.90364246138915e-05	0.00265678850389154	6	53	standard ATAC-Seq on frozen kidney
peak_15160	chr11	58740717	58740949	13.1648015327487	3.09702731970485	0.772342709100231	4.00991332372755	6.07410407453473e-05	0.00271404094998714	73.5	6.5	FFPE-ATAC in frozen kidney
peak_96655	chr8	93904224	93904436	13.1712827655885	3.09635356929206	0.772249675985237	4.00952394747428	6.08412828555081e-05	0.00271738205189015	66.5	7	FFPE-ATAC in frozen kidney
peak_43620	chr17	30277090	30277860	12.1778641444497	3.7768502269889	0.942446686383577	4.00749483398546	6.1366203456628e-05	0.00272940194873933	230	13.5	FFPE-ATAC in frozen kidney
peak_27993	chr13	98091356	98091563	10.6045626574404	-3.89570248491691	0.974994406229219	-3.99561521586929	6.45264658504881e-05	0.00283218364159314	4	43.5	standard ATAC-Seq on frozen kidney
peak_104345	chrUn_random	4318592	4319211	11.3233352730982	-3.19790099910131	0.80292033817781	-3.98283720942827	6.80974025587951e-05	0.00293013427038166	18	132.5	standard ATAC-Seq on frozen kidney
peak_24023	chr12	117113684	117114061	11.3125890190831	-3.19711764402496	0.803590818121435	-3.97853929130114	6.93399536880165e-05	0.00296109259798839	12	81	standard ATAC-Seq on frozen kidney
peak_29614	chr14	13493657	13494103	11.3125890190831	-3.19711764402496	0.803590818121435	-3.97853929130114	6.93399536880165e-05	0.00296109259798839	11	96.5	standard ATAC-Seq on frozen kidney
peak_75923	chr5	45493954	45494194	11.313032261416	-3.19701866383329	0.803573261893057	-3.97850303816948	6.93505253219087e-05	0.00296109259798839	7	52	standard ATAC-Seq on frozen kidney
peak_56512	chr2	70316834	70317103	12.9566413970185	3.06708889098755	0.775365321729048	3.95566941805962	7.63206387954872e-05	0.00316867256035692	83	9	FFPE-ATAC in frozen kidney
peak_24585	chr13	12956893	12957369	10.8427453435515	-3.48202248443245	0.881057079888842	-3.95209636686849	7.74695292481625e-05	0.00320096722972803	10.5	98	standard ATAC-Seq on frozen kidney
peak_95658	chr8	73160433	73160661	12.2271225273455	3.33355689833487	0.848075142837714	3.93073293857025	8.46872994895391e-05	0.00342670441518138	68	5	FFPE-ATAC in frozen kidney
peak_57365	chr2	91933682	91933948	10.3162351037677	-3.85372597908813	0.982090554185773	-3.9240026926877	8.70897610170883e-05	0.00349738975923385	4.5	53.5	standard ATAC-Seq on frozen kidney
peak_53598	chr2	4916528	4916980	12.7296482072554	3.03993208658411	0.775073966052992	3.92211868767151	8.77737341126255e-05	0.00351823636497042	136	15	FFPE-ATAC in frozen kidney
peak_31114	chr14	47449808	47450175	12.7253831860801	3.04079899456797	0.775637574302446	3.92038639605959	8.84071045229746e-05	0.00352623654791648	109	11	FFPE-ATAC in frozen kidney
peak_42645	chr17	13152337	13152570	12.7253831860801	3.04079899456797	0.775637574302446	3.92038639605959	8.84071045229746e-05	0.00352623654791648	70	6.5	FFPE-ATAC in frozen kidney
peak_42777	chr17	14713140	14713575	10.8530483552337	-3.48303541770361	0.888464027245933	-3.92028862271481	8.84429813941148e-05	0.00352623654791648	10.5	90.5	standard ATAC-Seq on frozen kidney
peak_24033	chr12	117140588	117140846	10.3106403555937	-3.85335532485508	0.983547236688584	-3.91781419449522	8.93555381153872e-05	0.00355493112321026	5.5	52	standard ATAC-Seq on frozen kidney
peak_54773	chr2	30314595	30314933	12.725826428413	3.04083818079203	0.77647110712717	3.91622837331666	8.99450501919348e-05	0.00357305539855906	101	8.5	FFPE-ATAC in frozen kidney
peak_105009	chrX	50392879	50393089	10.7912302851404	-3.47723209236929	0.888513123230123	-3.91354049980496	9.09526373577468e-05	0.00359906710310446	4.5	44.5	standard ATAC-Seq on frozen kidney
peak_53414	chr19	61301769	61302017	10.3415493906403	-3.85633755770122	0.985650629497552	-3.91247917090768	9.13534197794712e-05	0.00360751341372663	5	49	standard ATAC-Seq on frozen kidney
peak_97285	chr8	109298485	109298687	11.0500189946159	-3.15860776805526	0.80945321886421	-3.90214986418521	9.5342094994578e-05	0.00370739682143457	6	42	standard ATAC-Seq on frozen kidney
peak_51237	chr19	20602327	20602685	11.0397159829337	-3.15769428543857	0.809445686473208	-3.90105764748317	9.57733386608008e-05	0.00372009865615075	10.5	76	standard ATAC-Seq on frozen kidney
peak_56349	chr2	67918061	67918664	10.5436715358637	-3.43924892514831	0.882516090709002	-3.89709486473529	9.73534919907115e-05	0.00376093951806695	16.5	122.5	standard ATAC-Seq on frozen kidney
peak_88187	chr7	36918819	36919105	11.0341212347597	-3.15733747284124	0.810557227521221	-3.89526780545372	9.80902904574965e-05	0.00377845923541709	10	60	standard ATAC-Seq on frozen kidney
peak_50418	chr19	5414563	5415054	10.5539745475459	-3.44021442310164	0.883245817805508	-3.89496825657111	9.8211590766076e-05	0.00378044657174786	11.5	98.5	standard ATAC-Seq on frozen kidney
peak_42665	chr17	13392868	13393304	10.5385200300225	-3.4387655195594	0.883268760605474	-3.8932266971631	9.89196334210404e-05	0.0037994326154278	10	86.5	standard ATAC-Seq on frozen kidney
peak_87077	chr7	16487579	16487960	10.7860787792993	-3.47669997248016	0.893534219564649	-3.89095335842212	9.98511271163189e-05	0.00381597962551517	8	78.5	standard ATAC-Seq on frozen kidney
peak_2710	chr1	85108916	85109118	10.559126053387	-3.4407036010552	0.884738321986584	-3.88895056939488	0.000100678618876049	0.00384072553188892	4.5	41	standard ATAC-Seq on frozen kidney
peak_48221	chr18	42717549	42718427	7.12065275981503	6.13254633201074	1.57876544792984	3.88439355576982	0.000102585623541472	0.00389161906379968	166.5	1	FFPE-ATAC in frozen kidney
peak_12710	chr10	126591283	126591725	6.35839548686779	-6.2785353997075	1.61646194763973	-3.88412199178279	0.000102700336447118	0.00389161906379968	0	58	standard ATAC-Seq on frozen kidney
peak_24583	chr13	12946158	12946384	10.7865220216322	-3.47655158001469	0.89577200945973	-3.88106744048802	0.000103998994207723	0.00392946058107586	5	47.5	standard ATAC-Seq on frozen kidney
peak_73098	chr4	138893901	138894440	11.5049713751782	3.69029723674008	0.951293712317499	3.87924064771745	0.000104783054014536	0.00394483282784539	152.5	8.5	FFPE-ATAC in frozen kidney
peak_42351	chr17	7183801	7184038	11.6784411608702	4.33382584336044	1.11746957886404	3.87824950703892	0.000105210782790615	0.00394954989823058	70	2.5	FFPE-ATAC in frozen kidney
peak_29155	chr13_random	125868	126157	11.511452608018	3.68944512684287	0.951648265584095	3.8768999642724	0.000105795830383185	0.00396227479737318	82.5	5	FFPE-ATAC in frozen kidney
peak_29172	chr13_random	320741	320951	11.5092363963535	3.68924187123315	0.952657197867091	3.87258069271194	0.000107689005320631	0.00401697918868698	60	4.5	FFPE-ATAC in frozen kidney
peak_21609	chr12	71815296	71815502	10.0424755829525	-3.8122637427368	0.988459445531253	-3.85677304210279	0.000114893747241227	0.00420128962085188	4	40.5	standard ATAC-Seq on frozen kidney
peak_2697	chr1	84953406	84953650	10.0429188252854	-3.81213159419815	0.98842561804262	-3.85677133879565	0.00011489454750795	0.00420128962085188	4	48	standard ATAC-Seq on frozen kidney
peak_33099	chr14	103187565	103187795	6.32233494598004	-6.27264604326918	1.62648019125642	-3.85657696723849	0.000114985903854666	0.00420318976608315	1	31	standard ATAC-Seq on frozen kidney
peak_34671	chr15	34277446	34277664	10.0373240771114	-3.81175021084749	0.98959339758157	-3.85183472339537	0.000117236141809036	0.00424943421496111	4.5	43	standard ATAC-Seq on frozen kidney
peak_62758	chr3	40013821	40014029	10.0832039234977	-4.43772055174021	1.1523577256601	-3.85099214672958	0.000117640271671359	0.00426090924779601	3	42.5	standard ATAC-Seq on frozen kidney
peak_44473	chr17	44283244	44283546	11.7838824018345	3.27481331288651	0.850699115715522	3.84955532736397	0.000118332453283283	0.00427571659254303	86	7	FFPE-ATAC in frozen kidney
peak_23398	chr12	108449564	108449783	6.31718344013893	-6.27173578822276	1.63380761712482	-3.83872355746497	0.000123675578479991	0.00442182129345419	0.5	29.5	standard ATAC-Seq on frozen kidney
peak_73577	chr4	146883612	146883877	10.0274643077621	-3.81056165349313	0.994187987180805	-3.83283815800133	0.0001266732953038	0.00449639630146731	4.5	52.5	standard ATAC-Seq on frozen kidney
peak_86183	chr6	136100144	136100426	10.7715512102925	-3.11774442158426	0.816222767095925	-3.81972244253493	0.000133601927291999	0.0046593788207852	8.5	57	standard ATAC-Seq on frozen kidney
peak_21596	chr12	71384189	71384801	10.7612481986103	-3.1167947878524	0.817010712428118	-3.81487628061746	0.000136251178490558	0.00471252414785123	19.5	122	standard ATAC-Seq on frozen kidney
peak_74653	chr5	15019433	15019640	10.7818542219747	-3.11870083507333	0.818561934637076	-3.80997540089139	0.000138980619420572	0.00477596491877437	6	42.5	standard ATAC-Seq on frozen kidney
peak_27500	chr13	81233587	81233814	10.7668429467843	-3.11715734450296	0.819970028214765	-3.80155034604084	0.000143793511981142	0.0048971948681455	6.5	46.5	standard ATAC-Seq on frozen kidney
peak_80904	chr6	6973963	6974323	10.2549007398581	-3.39615244259588	0.893412299491993	-3.80132716387157	0.000143923116025636	0.00490004479995259	8	71	standard ATAC-Seq on frozen kidney
peak_6147	chr1	174482818	174483026	10.7509451869281	-3.11582313012901	0.820947350887282	-3.79539945742126	0.000147405924610456	0.00499471564365202	6	42.5	standard ATAC-Seq on frozen kidney
peak_44538	chr17	45501756	45502281	10.2909612807458	-3.39971320485145	0.896202802294066	-3.79346415359224	0.00014856008597112	0.00501630054848243	12	105.5	standard ATAC-Seq on frozen kidney
peak_29153	chr13_random	115493	115800	11.5667489814207	3.24352597932342	0.855337731664143	3.7920997276863	0.000149378899664541	0.00503254788478666	84.5	7	FFPE-ATAC in frozen kidney
peak_21066	chr12	46771457	46771680	9.77990555848535	-3.77036681533957	0.995447002921351	-3.78761180080368	0.000152102249447294	0.00507964385548537	4	43	standard ATAC-Seq on frozen kidney
peak_46666	chr18	3117853	3118671	9.76400779862913	-3.76891373748155	0.995440035292091	-3.78617857817588	0.000152981753571708	0.00510103315245464	13	158	standard ATAC-Seq on frozen kidney
peak_34312	chr15	20508708	20509065	9.78461382199356	-3.77104319691437	0.997115847834667	-3.78195091884615	0.000155604047093242	0.0051562445431354	6.5	68.5	standard ATAC-Seq on frozen kidney
peak_24541	chr13	12432919	12433257	9.75929953512092	-3.76823826321869	0.997015844890111	-3.77951692797221	0.000157132911058492	0.00519883371871385	6	63	standard ATAC-Seq on frozen kidney
peak_52292	chr19	40582900	40583358	11.0093701704411	4.24442224802483	1.12557716536155	3.77088517663866	0.000162669513273445	0.00533999979400542	128	5.5	FFPE-ATAC in frozen kidney
peak_41410	chr16	87001737	87002178	9.75414802927981	-3.76769140559023	0.999471296394099	-3.76968445135276	0.000163454072440167	0.00535319612751328	9	83.5	standard ATAC-Seq on frozen kidney
peak_68346	chr4	36611036	36611283	5.80145991822103	-6.14659930721445	1.63938345255747	-3.74933594555052	0.000177303439378107	0.00563112721491929	1	30	standard ATAC-Seq on frozen kidney
peak_42675	chr17	13554179	13554379	9.55762063223048	-4.35526092470603	1.16258414451391	-3.74618985237153	0.000179540733950157	0.00567872494350246	2.5	38.5	standard ATAC-Seq on frozen kidney
peak_78066	chr5	107613453	107613660	9.991887473058	-3.35434212545988	0.897255107204012	-3.73844862907779	0.000185159316811773	0.00581078948915675	5	40	standard ATAC-Seq on frozen kidney
peak_29151	chr13_random	109257	109630	6.45335473871753	5.99057245386414	1.60309635418669	3.73687610118943	0.000186320674485751	0.0058369354927493	64.5	1.5	FFPE-ATAC in frozen kidney
peak_94257	chr8	28787736	28788114	10.4926401836362	-3.07579745970684	0.823790530456706	-3.73371305688794	0.000188677443171992	0.00589346366039074	10.5	75.5	standard ATAC-Seq on frozen kidney
peak_78911	chr5	122064131	122064376	10.8428248599218	3.59618472112438	0.963248248672294	3.73339346952483	0.000188917118371216	0.00589858687106215	65	5.5	FFPE-ATAC in frozen kidney
peak_75906	chr5	45016808	45017060	10.4977916894774	-3.07629085136282	0.824199049927707	-3.73246105007359	0.000189618024662764	0.00590125658697328	7.5	50	standard ATAC-Seq on frozen kidney
peak_106625	chrY_random	40735141	40735407	10.4977916894774	-3.07629085136282	0.824199049927707	-3.73246105007359	0.000189618024662764	0.00590125658697328	9	52	standard ATAC-Seq on frozen kidney
peak_9613	chr10	63893294	63893494	5.81176292990324	-6.14848883605147	1.64731788603563	-3.73242401370884	0.000189645915565284	0.00590125658697328	0	24.5	standard ATAC-Seq on frozen kidney
peak_40513	chr16	45670020	45670518	10.4874886777951	-3.07530454093778	0.824215184259198	-3.73119131953611	0.000190576421032594	0.00591985289682643	16	100.5	standard ATAC-Seq on frozen kidney
peak_51775	chr19	29960160	29960387	9.99748222123201	-3.35473654387655	0.899577080942105	-3.72923745496408	0.000192060101104179	0.00595113453356293	5.5	43.5	standard ATAC-Seq on frozen kidney
peak_30980	chr14	44040306	44040704	9.9914442307251	-3.35446899220428	0.899627138090701	-3.72873254949106	0.000192445265682699	0.00595882248798888	10	77	standard ATAC-Seq on frozen kidney
peak_94563	chr8	37574652	37574941	9.9914442307251	-3.35446899220428	0.899627138090701	-3.72873254949106	0.000192445265682699	0.00595882248798888	7.5	56.5	standard ATAC-Seq on frozen kidney
peak_24378	chr13	8138724	8138984	9.98158446137579	-3.35329238877764	0.899832604060426	-3.72657355784416	0.000194100444532206	0.0059978892360356	7.5	48.5	standard ATAC-Seq on frozen kidney
peak_47550	chr18	30421293	30421595	9.50658928000308	-3.72627459736764	1.001978267214	-3.71891758463838	0.000200078313776312	0.00612264958066194	5.5	55.5	standard ATAC-Seq on frozen kidney
peak_85672	chr6	125788260	125788545	9.48598325663865	-3.72407503827752	1.0018354221151	-3.71725231117817	0.000201401280745886	0.00614518674774571	5	53.5	standard ATAC-Seq on frozen kidney
peak_34322	chr15	25293898	25294504	10.4776289084458	-3.07419033293886	0.827585992112905	-3.7146476163645	0.00020348705680102	0.00619112416530527	18.5	118.5	standard ATAC-Seq on frozen kidney
peak_90341	chr7	100846121	100846688	10.5132462070007	-3.07781134693415	0.830520361207469	-3.70588307125838	0.000210655474479252	0.00633873372318407	18	109.5	standard ATAC-Seq on frozen kidney
peak_98718	chr8	130333103	130333534	10.0176450022635	-3.3570027746372	0.905985000868519	-3.70536241926635	0.00021108868593621	0.0063499785390695	12	82	standard ATAC-Seq on frozen kidney
peak_104410	chrX	4782051	4782500	9.2735580997331	-4.31020736198586	1.16337325971225	-3.70492215288835	0.000211455664815712	0.00635922516671401	6	83.5	standard ATAC-Seq on frozen kidney
peak_24030	chr12	117137078	117137460	9.26840659389199	-4.30965485294611	1.16370457960436	-3.70339253490893	0.000212735322195255	0.00638221699461927	5.5	71	standard ATAC-Seq on frozen kidney
peak_8300	chr10	28937398	28937598	9.97128144969357	-3.35220501299753	0.905984392537951	-3.70006927338664	0.000215540622560558	0.00643311887212143	5.5	38	standard ATAC-Seq on frozen kidney
peak_20033	chr12	14075800	14076093	9.97128144969357	-3.35220501299753	0.905984392537951	-3.70006927338664	0.000215540622560558	0.00643311887212143	6.5	56.5	standard ATAC-Seq on frozen kidney
peak_76923	chr5	75934574	75934793	9.50703252233598	-3.72614108865257	1.007853048088	-3.69710752546856	0.000218069992139509	0.00646700562292322	4	41	standard ATAC-Seq on frozen kidney
peak_106626	chrY_random	40737055	40737567	9.47568024495643	-3.72294215310163	1.00703718298173	-3.69692620691364	0.000218225742199914	0.00646802914402028	9	95.5	standard ATAC-Seq on frozen kidney
peak_96187	chr8	85139668	85139887	9.25810358220977	-4.30853497053573	1.16662182386596	-3.69317192803584	0.000221474178608096	0.0065280431855421	3	40	standard ATAC-Seq on frozen kidney
peak_99587	chr9	29974141	29974347	9.25810358220977	-4.30853497053573	1.16662182386596	-3.69317192803584	0.000221474178608096	0.0065280431855421	2.5	38.5	standard ATAC-Seq on frozen kidney
peak_9037	chr10	52401771	52401978	5.76539937733328	-6.13993502808847	1.66432569192443	-3.6891427308251	0.00022501096460258	0.00659222815322896	0.5	25.5	standard ATAC-Seq on frozen kidney
peak_18715	chr11	109516761	109517021	11.1174708654028	3.18180759048737	0.863972900094678	3.68276318636695	0.00023071947067802	0.00669513142257695	69.5	6	FFPE-ATAC in frozen kidney
peak_21909	chr12	77094473	77094673	11.1152546537383	3.18159672875349	0.863961817566153	3.68256636354173	0.000230897733320788	0.00669848261094654	53	5	FFPE-ATAC in frozen kidney
peak_106494	chrY_random	17258894	17259101	10.4668826544307	-3.07326245657821	0.834574717398787	-3.68242937691305	0.000231021878536421	0.00670026242503795	6	41	standard ATAC-Seq on frozen kidney
peak_29171	chr13_random	319793	320109	11.1226223712439	3.18080176624393	0.8654203521735	3.67544137164716	0.000237438564835696	0.0068417316517779	83.5	8	FFPE-ATAC in frozen kidney
peak_90394	chr7	103861412	103861764	10.9799416403775	-5.59534876458163	1.52297601542258	-3.67395724418489	0.00023882271258134	0.00686493056442391	3.5	80	standard ATAC-Seq on frozen kidney
peak_30979	chr14	44037788	44038033	10.9588923746801	-5.59361661601268	1.52671609249776	-3.66382239861069	0.000248479109000049	0.00707201104545591	2.5	55.5	standard ATAC-Seq on frozen kidney
peak_99210	chr9	16152160	16152360	5.53329514557986	-6.0777849422558	1.65950499558141	-3.66240834371604	0.000249855161975959	0.00709981242023883	0.5	22.5	standard ATAC-Seq on frozen kidney
peak_76972	chr5	77266070	77266413	9.71857119457573	-3.31020853850162	0.904111694586421	-3.66128273566448	0.000250955625617241	0.00711781398431292	8	63	standard ATAC-Seq on frozen kidney
peak_94602	chr8	37942517	37942862	9.71857119457573	-3.31020853850162	0.904111694586421	-3.66128273566448	0.000250955625617241	0.00711781398431292	9.5	64.5	standard ATAC-Seq on frozen kidney
peak_106608	chrY_random	39693477	39693769	9.71857119457573	-3.31020853850162	0.904111694586421	-3.66128273566448	0.000250955625617241	0.00711781398431292	7.5	54	standard ATAC-Seq on frozen kidney
peak_44911	chr17	50187574	50187867	9.71341968873462	-3.30966853172682	0.904547190233833	-3.65892301414506	0.000253277405045956	0.00716272260689335	7	55	standard ATAC-Seq on frozen kidney
peak_20252	chr12	19562174	19562512	9.21266697815638	-3.67851986402232	1.00598957973653	-3.65661825740353	0.000255564537409862	0.00720068436920245	6	59.5	standard ATAC-Seq on frozen kidney
peak_1100	chr1	41867224	41867612	9.72887420625794	-3.31129337237867	0.905982613914858	-3.65491933456667	0.000257262853276541	0.00723134976487361	8.5	73.5	standard ATAC-Seq on frozen kidney
peak_33940	chr15	6931001	6931697	9.72887420625794	-3.31129337237867	0.905982613914858	-3.65491933456667	0.000257262853276541	0.00723134976487361	19.5	131	standard ATAC-Seq on frozen kidney
peak_34520	chr15	30692935	30693135	9.00024182125082	-4.26468801408383	1.16722000002022	-3.6537139648138	0.000258474203900033	0.0072558421547849	2.5	35.5	standard ATAC-Seq on frozen kidney
peak_63161	chr3	55140822	55141376	9.70826818289351	-3.30912464641529	0.905902305409547	-3.65284934882606	0.000259346401795432	0.00727005160831815	12	103.5	standard ATAC-Seq on frozen kidney
peak_64569	chr3	93632195	93632465	9.00539332709193	-4.26525939660318	1.1680669451897	-3.65155388924261	0.000260658387741946	0.00728457585920728	4	49	standard ATAC-Seq on frozen kidney
peak_106616	chrY_random	40681744	40682097	9.20707222998237	-3.67809477430414	1.00776850009891	-3.6497417551185	0.000262504083068108	0.00733086197101204	6.5	64.5	standard ATAC-Seq on frozen kidney
peak_83613	chr6	84335782	84336037	9.20751547231527	-3.6779462228686	1.00773691138521	-3.64970874969041	0.000262537813105355	0.00733086197101204	4	46	standard ATAC-Seq on frozen kidney
peak_105091	chrX	66613319	66614139	10.219323905154	-3.03298820458919	0.831872971566566	-3.64597517680799	0.000266379690808807	0.00739522838796422	25.5	157	standard ATAC-Seq on frozen kidney
peak_20900	chr12	40487617	40488004	8.9847873037275	-4.26297183705875	1.16942892446357	-3.64534496101525	0.000267033364150793	0.00739522838796422	5.5	69	standard ATAC-Seq on frozen kidney
peak_35755	chr15	65424456	65424984	10.2141723993129	-3.03247580140879	0.831878464800157	-3.6453351417593	0.000267043560780369	0.00739522838796422	14	101.5	standard ATAC-Seq on frozen kidney
peak_64490	chr3	91973883	91974168	10.2141723993129	-3.03247580140879	0.831878464800157	-3.6453351417593	0.000267043560780369	0.00739522838796422	8	55	standard ATAC-Seq on frozen kidney
peak_30972	chr14	43998077	43998670	9.70311667705241	-3.30857280469391	0.908200132937341	-3.64299969214183	0.000269479160612879	0.00743380043587537	12.5	110.5	standard ATAC-Seq on frozen kidney
peak_105731	chrX	122679407	122679616	9.70311667705241	-3.30857280469391	0.908200132937341	-3.64299969214183	0.000269479160612879	0.00743380043587537	4.5	39.5	standard ATAC-Seq on frozen kidney
peak_9475	chr10	61417236	61417595	10.224918653328	-3.03338549525	0.832741483499913	-3.6426496762249	0.000269845975299531	0.00743616617005043	11	68.5	standard ATAC-Seq on frozen kidney
peak_29169	chr13_random	309412	309763	10.3429586340094	4.14937421318183	1.13914144275082	3.64254521647622	0.000269955539169974	0.00743726464884467	91	4	FFPE-ATAC in frozen kidney
peak_45846	chr17	75532884	75533131	5.49723460469211	-6.0708379995125	1.66698371408648	-3.64181002382459	0.000270727835149823	0.00744892489384252	0.5	28.5	standard ATAC-Seq on frozen kidney
peak_45830	chr17	75282361	75282583	9.01569633877414	-4.26642623056459	1.17218731737512	-3.63971369364276	0.000272941348485563	0.00750015833756324	3	39.5	standard ATAC-Seq on frozen kidney
peak_22793	chr12	91977217	91977475	9.20192072414126	-3.67751292911841	1.01050970795504	-3.63926531350257	0.000273416989550935	0.00750742825580913	4	45.5	standard ATAC-Seq on frozen kidney
peak_42666	chr17	13399382	13399752	9.20192072414126	-3.67751292911841	1.01050970795504	-3.63926531350257	0.000273416989550935	0.00750742825580913	7.5	67.5	standard ATAC-Seq on frozen kidney
peak_83395	chr6	73723157	73723357	8.97963579788639	-4.2623849088813	1.17181822209821	-3.63741135655773	0.000275391923595987	0.00752871986667061	2.5	36.5	standard ATAC-Seq on frozen kidney
peak_30860	chr14	37911278	37911546	10.2038693876307	-3.03144252433511	0.834590290347468	-3.63225232715447	0.00028095819081743	0.00763006360865629	8.5	50.5	standard ATAC-Seq on frozen kidney
peak_65228	chr3	102250695	102250955	10.2038693876307	-3.03144252433511	0.834590290347468	-3.63225232715447	0.00028095819081743	0.00763006360865629	8.5	49.5	standard ATAC-Seq on frozen kidney
peak_42255	chr17	5868959	5869345	6.007898401542	5.88740833836018	1.62121909071893	3.63146990561861	0.000281811524191585	0.00764739863752957	61.5	2	FFPE-ATAC in frozen kidney
peak_27954	chr13	97341998	97342913	10.8938562121492	3.14928027198996	0.867335989335848	3.63098073954188	0.000282346257125436	0.00765476760752823	237	23.5	FFPE-ATAC in frozen kidney
peak_50735	chr19	8479015	8479684	10.894742696815	3.14936677338897	0.868406786119007	3.62660313545428	0.000287174148201976	0.00772806274585096	174.5	16.5	FFPE-ATAC in frozen kidney
peak_85050	chr6	115818074	115818501	10.398698249745	3.53063856931138	0.973960164379163	3.62503385501596	0.000288923600011678	0.00775753322718822	107.5	6.5	FFPE-ATAC in frozen kidney
peak_78558	chr5	115705802	115706002	10.8900344333068	3.15045990350762	0.871824827191806	3.61363866369282	0.000301929763539077	0.00799013087782317	51	4.5	FFPE-ATAC in frozen kidney
peak_11248	chr10	89736302	89736502	8.72177403692744	-4.21709756336729	1.17066389523004	-3.60231282484252	0.000315398489594994	0.00823021135687832	2.5	34	standard ATAC-Seq on frozen kidney
peak_33340	chr14	116398207	116398560	8.72177403692744	-4.21709756336729	1.17066389523004	-3.60231282484252	0.000315398489594994	0.00823021135687832	4.5	61.5	standard ATAC-Seq on frozen kidney
peak_80762	chr6	3230255	3230563	8.72177403692744	-4.21709756336729	1.17066389523004	-3.60231282484252	0.000315398489594994	0.00823021135687832	4.5	53	standard ATAC-Seq on frozen kidney
peak_65825	chr3	120464739	120464965	8.71662253108634	-4.2165111523824	1.17102901057416	-3.60068889353563	0.000317375154364309	0.00826158730076265	3	39.5	standard ATAC-Seq on frozen kidney
peak_10250	chr10	76086026	76086417	8.94450220551521	-3.63206198768318	1.00934498965377	-3.59843465308036	0.000320138264945685	0.00830918827729738	9	68	standard ATAC-Seq on frozen kidney
peak_65519	chr3	107836235	107836453	8.94450220551521	-3.63206198768318	1.00934498965377	-3.59843465308036	0.000320138264945685	0.00830918827729738	4.5	38	standard ATAC-Seq on frozen kidney
peak_66400	chr3	131813814	131814150	8.94450220551521	-3.63206198768318	1.00934498965377	-3.59843465308036	0.000320138264945685	0.00830918827729738	4.5	58	standard ATAC-Seq on frozen kidney
peak_47528	chr18	26166473	26166857	8.73207704860966	-4.2182760729532	1.17245950983744	-3.59780106482148	0.000320918923116199	0.00831529140733888	6	65.5	standard ATAC-Seq on frozen kidney
peak_35	chr1	4746141	4746461	8.94921046902341	-3.63279435815394	1.00991887313586	-3.59711503051122	0.000321766210217327	0.0083271347068637	6.5	56.5	standard ATAC-Seq on frozen kidney
peak_67340	chr3	156224680	156224998	8.94921046902341	-3.63279435815394	1.00991887313586	-3.59711503051122	0.000321766210217327	0.0083271347068637	5.5	56	standard ATAC-Seq on frozen kidney
peak_66083	chr3	123383113	123383364	5.23422133789205	-5.99927215906907	1.66930457878121	-3.59387509944366	0.000325796058854452	0.00840899014896684	1	27.5	standard ATAC-Seq on frozen kidney
peak_67338	chr3	155930723	155931231	8.95480521719742	-3.63323193181784	1.01136463495655	-3.59240555407985	0.000327639417706969	0.00843209201851214	11	88.5	standard ATAC-Seq on frozen kidney
peak_19940	chr12	10811433	10811633	8.93375595150009	-3.63104236980346	1.01118072631479	-3.59089357155437	0.00032954619300441	0.00847094876891438	3	35	standard ATAC-Seq on frozen kidney
peak_1215	chr1	44275757	44276059	9.18646620661794	-3.67566792575072	1.02507984223694	-3.58573817794491	0.000336126063995796	0.00856579583339274	4.5	54	standard ATAC-Seq on frozen kidney
peak_40747	chr16	54983981	54984220	9.45040642193456	-3.26524471976206	0.911283265674889	-3.58312814769384	0.000339503944867091	0.00861689115634241	6.5	43	standard ATAC-Seq on frozen kidney
peak_98780	chr8_random	138816	139194	8.92904768799189	-3.63029478957128	1.01349845334111	-3.58194408447651	0.000341046799000034	0.00863877773537427	7	67	standard ATAC-Seq on frozen kidney
peak_24592	chr13	13058374	13058865	9.43495190441124	-3.26356594674345	0.911152953284245	-3.58179813277227	0.000341237429956047	0.00863877773537427	10	90	standard ATAC-Seq on frozen kidney
peak_85950	chr6	130915308	130915709	9.43495190441124	-3.26356594674345	0.911152953284245	-3.58179813277227	0.000341237429956047	0.00863877773537427	9	72.5	standard ATAC-Seq on frozen kidney
peak_4647	chr1	139271266	139271567	9.44481167376055	-3.26482397208008	0.912960738592213	-3.57608365187143	0.000348780086905633	0.00874211511696452	8	53.5	standard ATAC-Seq on frozen kidney
peak_106598	chrY_random	21171005	21171205	9.43966016791945	-3.26426181873848	0.912916244588905	-3.57564216661344	0.000349369254614464	0.00874911910874568	5	36.5	standard ATAC-Seq on frozen kidney
peak_62567	chr3	35145383	35145604	8.9384642150083	-3.63177884255907	1.01617662651826	-3.57396415916658	0.000351617080615932	0.00878022329014756	4	38	standard ATAC-Seq on frozen kidney
peak_30982	chr14	44097211	44098054	9.42980039857013	-3.26299969237029	0.913070133548246	-3.57365723889147	0.000352029685542133	0.00878641391275581	22.5	151	standard ATAC-Seq on frozen kidney
peak_42260	chr17	5890495	5890762	10.1755268388243	3.49660257561195	0.978711773527012	3.57265813101557	0.000353375963844961	0.00880416804179294	66.5	4.5	FFPE-ATAC in frozen kidney
peak_50716	chr19	8205883	8206634	10.1755268388243	3.49660257561195	0.978711773527012	3.57265813101557	0.000353375963844961	0.00880416804179294	188	12	FFPE-ATAC in frozen kidney
peak_46655	chr17_random	345544	345793	10.1708185753161	3.49785479244856	0.979329989061625	3.57168148787125	0.000354696624185824	0.0088220243583337	62	5	FFPE-ATAC in frozen kidney
peak_36817	chr15	82340151	82340358	10.1699320906503	3.4977610393857	0.979327413429601	3.5715951493041	0.000354813596840302	0.00882287709076138	52	4	FFPE-ATAC in frozen kidney
peak_73483	chr4	145168482	145168687	10.1595495625977	-5.48065092021402	1.53559268766169	-3.56907854814003	0.000358239015382519	0.0088667272512944	1.5	42.5	standard ATAC-Seq on frozen kidney
peak_59952	chr2	153353863	153354229	9.46070943361678	-3.26639068492264	0.916310568856891	-3.56472008065726	0.000364244711346701	0.00897996186354074	9	67.5	standard ATAC-Seq on frozen kidney
peak_47158	chr18	14661696	14661929	9.43024364090304	-3.26285053465708	0.915790868363515	-3.5628773417316	0.000366812096590844	0.00902449101183759	5.5	42	standard ATAC-Seq on frozen kidney
peak_86531	chr6	142885364	142885688	10.6762795494026	3.11502122041179	0.874420853369886	3.56238212801875	0.00036750492900577	0.00903725735189755	82.5	9	FFPE-ATAC in frozen kidney
peak_57462	chr2	93407994	93408202	8.45876077012738	-4.16971220457987	1.1774578864483	-3.54128351643849	0.000398185463387633	0.00952762596768015	3	35	standard ATAC-Seq on frozen kidney
peak_645	chr1	26866127	26866498	8.67074268470003	-3.58360289721875	1.01375468178401	-3.53498036715582	0.000407805456701406	0.00968185533998168	6.5	62.5	standard ATAC-Seq on frozen kidney
peak_46597	chr17	89433038	89433363	8.67074268470003	-3.58360289721875	1.01375468178401	-3.53498036715582	0.000407805456701406	0.00968185533998168	6	55	standard ATAC-Seq on frozen kidney
peak_69664	chr4	71675107	71675941	8.67074268470003	-3.58360289721875	1.01375468178401	-3.53498036715582	0.000407805456701406	0.00968185533998168	16	140	standard ATAC-Seq on frozen kidney
peak_24491	chr13	10379584	10379784	8.67118592703294	-3.58345065868362	1.01372326454717	-3.5349397453992	0.000407868152624789	0.00968185533998168	4	33.5	standard ATAC-Seq on frozen kidney
peak_55858	chr2	53703368	53703670	8.66603442119183	-3.58285049591871	1.01366057325175	-3.53456629414437	0.0004084449621067	0.00968582088378018	4.5	49.5	standard ATAC-Seq on frozen kidney
peak_80681	chr5	151212264	151212467	8.66603442119183	-3.58285049591871	1.01366057325175	-3.53456629414437	0.0004084449621067	0.00968582088378018	4	33.5	standard ATAC-Seq on frozen kidney
peak_95735	chr8	73956865	73957197	8.66603442119183	-3.58285049591871	1.01366057325175	-3.53456629414437	0.0004084449621067	0.00968582088378018	7.5	55.5	standard ATAC-Seq on frozen kidney
peak_96998	chr8	105704569	105704864	8.67633743287404	-3.58405320373697	1.01480582422639	-3.5317625482384	0.000412799848923167	0.00974911691633699	6	48.5	standard ATAC-Seq on frozen kidney
peak_20778	chr12	35248077	35248378	8.66043967301782	-3.58240083093276	1.01464927762599	-3.53067893500562	0.000414494548640954	0.00977111989169383	5.5	51	standard ATAC-Seq on frozen kidney
peak_38719	chr16	15053055	15053318	8.66043967301782	-3.58240083093276	1.01464927762599	-3.53067893500562	0.000414494548640954	0.00977111989169383	4	45	standard ATAC-Seq on frozen kidney
peak_81088	chr6	14550712	14550965	8.66043967301782	-3.58240083093276	1.01464927762599	-3.53067893500562	0.000414494548640954	0.00977111989169383	4.5	43	standard ATAC-Seq on frozen kidney
peak_73588	chr4	147169372	147169624	8.66088291535072	-3.58224772074204	1.01461773119465	-3.53063780634323	0.000414558998975623	0.00977111989169383	4.5	42.5	standard ATAC-Seq on frozen kidney
peak_96088	chr8	82971155	82971521	8.66088291535072	-3.58224772074204	1.01461773119465	-3.53063780634323	0.000414558998975623	0.00977111989169383	6	62	standard ATAC-Seq on frozen kidney
peak_98541	chr8	128603420	128603639	8.68148893871515	-3.58466297217184	1.01689254644907	-3.52511480656365	0.00042329929455276	0.00988757837742427	3	37	standard ATAC-Seq on frozen kidney
peak_62621	chr3	36653320	36653647	9.41434588104681	-3.26122117563526	0.925194729162557	-3.52490245873662	0.000423638751335269	0.00989117689414105	8.5	57.5	standard ATAC-Seq on frozen kidney

## Sheet: README
Supplemental Table S6: List of differential accessible chromatin peaks between FFPE-ATAC on frozen mouse kidney and standard ATAC-Seq on frozen mouse kidney.
