# Supplementary material for: Profiling chromatin accessibility in formalin-fixed paraffin-embedded samples
Source: HighWire-hosted journal article supplement (doi:10.1101/gr.275269.121), 2021-07-14
Supplement: Supplemental_Table_S7.xlsx [file Supplemental_Table_S7.xlsx]

## Sheet: Supplemental_Table_S7
	chr	start	end	baseMean	log2FoldChange	lfcSE	stat	pvalue	padj	readcounts (FFPE-ATAC in frozen kidney)	readcounts (FFPE-ATAC in FFPE kidney)	Group
peak_127140	chrM	52	3426	64.7189696302468	9.36743947749655	1.46162506550467	6.40892093230635	1.46553168508226e-10	3.43843043954001e-06	0	6832.5	FFPE-ATAC in FFPE kidney
peak_127141	chrM	12839	16242	64.7189696302468	9.36743947749655	1.46162506550467	6.40892093230635	1.46553168508226e-10	3.43843043954001e-06	0	6908	FFPE-ATAC in FFPE kidney
peak_70622	chr2	102501068	102502119	40.0884901936314	8.6765060478072	1.47007897536743	5.90206797946933	3.58973183050451e-09	5.61481921381978e-05	4	1331	FFPE-ATAC in FFPE kidney
peak_86211	chr4	101028919	101029157	20.7827989068056	-3.33420073111365	0.639294800059033	-5.21543539976512	1.833859643795e-07	0.000938597265632121	110	14.5	FFPE-ATAC in frozen kidney
peak_70620	chr2	102492073	102492576	23.7343402259842	5.44499563133142	1.08076209487876	5.03810751425568	4.70157337595819e-07	0.00162892695832256	8	371.5	FFPE-ATAC in FFPE kidney
peak_14601	chr10	107769866	107770070	17.685834160661	-3.81662362077567	0.768696165513842	-4.96506134933614	6.86793560459237e-07	0.00166210186692932	82	7.5	FFPE-ATAC in frozen kidney
peak_29112	chr12	114052688	114053051	19.9474678121904	-3.08060303342747	0.622400346128369	-4.94955224975422	7.43844071381718e-07	0.00166210186692932	156	26.5	FFPE-ATAC in frozen kidney
peak_70621	chr2	102499698	102500852	22.0995550224433	5.33947679633145	1.08548013047272	4.91900003181645	8.69874554545042e-07	0.00182957404125063	19.5	789.5	FFPE-ATAC in FFPE kidney
peak_72234	chr2	130467968	130468231	17.8551084639499	-3.09196095365143	0.661710728003862	-4.67267768648505	2.97298121930056e-06	0.00332370486808366	102	17.5	FFPE-ATAC in frozen kidney
peak_106952	chr7	27950407	27950607	17.5860229923384	-3.06754195463358	0.66102538808211	-4.64058114853002	3.47430705782329e-06	0.00349759865241127	75.5	13	FFPE-ATAC in frozen kidney
peak_9675	chr10	19654258	19654554	15.321049241742	-3.93954051390929	0.849916515881619	-4.63520880026999	3.56577367616602e-06	0.00349759865241127	104.5	8	FFPE-ATAC in frozen kidney
peak_89450	chr4	141093803	141094235	16.0510402157012	-3.38071185107809	0.733510434355813	-4.60894854760603	4.04710463027682e-06	0.00365204495521365	151.5	20.5	FFPE-ATAC in frozen kidney
peak_89115	chr4	138010958	138011380	15.2885589759832	-3.59030550360771	0.785600931464247	-4.57013906146457	4.87400687812685e-06	0.00385187821698927	144.5	16	FFPE-ATAC in frozen kidney
peak_13043	chr10	80039480	80039707	16.5566830137203	-3.18491807827299	0.698283536280966	-4.56106712072256	5.08943077003952e-06	0.00385187821698927	82.5	13.5	FFPE-ATAC in frozen kidney
peak_15011	chr10	116386799	116387486	16.0207388032088	-3.13223523551034	0.699458514128316	-4.478085793857	7.5315334432117e-06	0.00437073891577116	239.5	35	FFPE-ATAC in frozen kidney
peak_11509	chr10	59681766	59682277	14.7570682308944	-3.53488636034141	0.79103210914571	-4.46870148439231	7.86958645644974e-06	0.00439610089145771	168	18.5	FFPE-ATAC in frozen kidney
peak_127295	chrUn_random	4766866	4767087	16.1229541819865	3.18451382255765	0.730008139092112	4.36229906493663	1.28702772886725e-05	0.00533212419033714	9	102	FFPE-ATAC in FFPE kidney
peak_28664	chr12	109416736	109417454	14.7223133529793	-3.24339836741411	0.744722498156013	-4.35517709676423	1.32959379805665e-05	0.00533212419033714	232	33.5	FFPE-ATAC in frozen kidney
peak_73240	chr2	152223562	152223783	14.1908226078906	-3.18459155774998	0.750643024920987	-4.2424847124706	2.21058604022872e-05	0.00696171405044916	68	9.5	FFPE-ATAC in frozen kidney
peak_70619	chr2	102489349	102491312	20.6575516982147	6.25873661875734	1.49181556859279	4.19538229156647	2.72411729614258e-05	0.00769690272690624	23	1264	FFPE-ATAC in FFPE kidney
peak_127398	chrUn_random	5897307	5897508	14.4545274668862	3.30112065051354	0.789074991960326	4.18353221702344	2.87014393578881e-05	0.0077374190346575	7	83	FFPE-ATAC in FFPE kidney
peak_4389	chr1	108069035	108069417	13.9251151147911	-3.15362013202585	0.753861328651372	-4.18328943556177	2.8732120941741e-05	0.0077374190346575	114.5	17	FFPE-ATAC in frozen kidney
peak_32753	chr13	60277892	60278144	12.6557640723635	-3.64469780432428	0.876435188610273	-4.15854800410688	3.2027693196679e-05	0.00810018289684059	73	7.5	FFPE-ATAC in frozen kidney
peak_67405	chr2	32591901	32592224	13.6537650310234	-3.12284895095317	0.756130830403283	-4.13003785242773	3.62703511436213e-05	0.00855251234705169	94.5	15	FFPE-ATAC in frozen kidney
peak_60731	chr18	74602230	74602845	13.3913597575461	-3.09144776269172	0.758604042086636	-4.07517966050945	4.59788356348478e-05	0.00966167201922776	179	26.5	FFPE-ATAC in frozen kidney
peak_89249	chr4	139130970	139131190	12.119819861852	-3.57731315302452	0.879897639651031	-4.06560148796772	4.79087401698146e-05	0.00966167201922776	59.5	7	FFPE-ATAC in frozen kidney
peak_67304	chr2	32006635	32007025	12.622160440249	-3.28907002988127	0.811150805817832	-4.05481940755161	5.01730500620026e-05	0.00987526158840786	107	14.5	FFPE-ATAC in frozen kidney

## Sheet: README7
Supplemental Table S7: List of differential accessible chromatin peaks between FFPE-ATAC on frozen mouse kidney and FFPE-ATAC on FFPE mouse kidney.
