# Supplementary material for: Profiling chromatin accessibility in formalin-fixed paraffin-embedded samples
Source: HighWire-hosted journal article supplement (doi:10.1101/gr.275269.121), 2021-07-14
Supplement: Supplemental_Table_S8.xlsx [file Supplemental_Table_S8.xlsx]

## Sheet: Supplemental_Table_S8
	chr	start	end	baseMean	log2FoldChange	lfcSE	stat	pvalue	padj	readcounts (standard ATAC in FFPE kidney)	readcounts (FFPE-ATAC in FFPE kidney)	Group
peak_70275	chr3	5860198	5860969	344.630721907812	3.94661872655946	0.277200554609269	14.2374128079305	5.36777829741152e-46	6.52528600946534e-41	4420	565	standard ATAC in FFPE kidney
peak_44142	chr16	11143847	11144706	255.458113680645	3.72487737408205	0.27438170544323	13.5755310947753	5.59367748302091e-42	3.39994904772977e-37	3608	534	standard ATAC in FFPE kidney
peak_91638	chr5	147072414	147073078	254.979894050455	3.68743229642515	0.27440717356598	13.437813044412	3.63007000632716e-41	1.47095276749718e-36	2762.5	424.5	standard ATAC in FFPE kidney
peak_46739	chr16	57391139	57391948	254.336234890897	3.5839906478204	0.270554553585723	13.2468317399243	4.70656656980484e-40	1.43037264622939e-35	3355	552.5	standard ATAC in FFPE kidney
peak_118525	chr9	123370736	123371447	226.577806292034	3.64682387686716	0.277007430968098	13.1650759841427	1.39397324984004e-39	3.38913928287109e-35	2619	415.5	standard ATAC in FFPE kidney
peak_21465	chr11	108872824	108873562	266.101524141901	3.41500936858345	0.267154050516252	12.7829219208327	2.04249418779081e-37	4.13822939074337e-33	3168	584.5	standard ATAC in FFPE kidney
peak_50564	chr17	39979971	39985752	1355.13942607494	4.93833936495	0.397429378820371	12.4257028496678	1.89553100539062e-35	3.29183330199007e-31	133942	8587	standard ATAC in FFPE kidney
peak_51415	chr17	56218179	56219259	146.584402482002	3.5269409069321	0.291486840915649	12.0998289180153	1.05831501670226e-33	1.60816258362991e-29	2578	444	standard ATAC in FFPE kidney
peak_113592	chr9	40608621	40609589	112.537696087597	3.94519710273037	0.336108179457007	11.7378788850184	8.15050011381222e-32	1.10089710648385e-27	1794	233	standard ATAC in FFPE kidney
peak_84162	chr4	151235650	151236956	92.8259326530849	3.84149665045985	0.349583203384085	10.9887906892346	4.32684492120496e-28	5.2598857600136e-24	2005	277	standard ATAC in FFPE kidney
peak_69544	chr2	167905930	167906808	84.2288380424771	4.39038388985649	0.405895859274534	10.8165279086698	2.87462145475791e-27	3.17682256841991e-23	1235.5	119.5	standard ATAC in FFPE kidney
peak_46019	chr16	38088443	38090000	93.9450815273055	3.53389502325519	0.330248309983479	10.7007209921286	1.00989340998029e-26	9.66594674362022e-23	2375.5	411	standard ATAC in FFPE kidney
peak_35129	chr14	35123296	35124216	84.2133745412622	3.97230851686475	0.371293601819973	10.6985644174681	1.03367203832601e-26	9.66594674362022e-23	1282	162.5	standard ATAC in FFPE kidney
peak_105968	chr8	4165762	4166723	109.341330969471	3.20540076133615	0.299987711614234	10.6851068801715	1.1951131701297e-26	1.0377338386689e-22	1678.5	358	standard ATAC in FFPE kidney
peak_40098	chr15	38230257	38231151	87.037212601186	3.74168410248264	0.351285356997076	10.6514092544819	1.71745117975153e-26	1.39186823476877e-22	1287.5	185.5	standard ATAC in FFPE kidney
peak_30863	chr13	64254342	64255150	81.5526378901806	3.80465464469949	0.363838174194966	10.4569968588858	1.36101150412466e-25	1.03406251554631e-21	1089.5	160	standard ATAC in FFPE kidney
peak_51510	chr17	57170728	57172121	108.632633454388	3.07825065769559	0.295562033965397	10.4149055154221	2.12007996960761e-25	1.51603177309047e-21	2393	560	standard ATAC in FFPE kidney
peak_95555	chr6	88791569	88792803	94.4356977530549	3.2685921918201	0.315864753870083	10.3480750915453	4.26984026485914e-25	2.88366034420743e-21	1863	382.5	standard ATAC in FFPE kidney
peak_108712	chr8	73222176	73223197	84.496193226957	3.50041771329873	0.339760640008391	10.3025992451989	6.85826965145218e-25	4.38799311531123e-21	1404.5	247.5	standard ATAC in FFPE kidney
peak_77359	chr4	16090269	16091729	91.5936302454248	3.29400252408421	0.320074898632263	10.2913491128485	7.70886035084484e-25	4.68559949845051e-21	2148.5	440	standard ATAC in FFPE kidney
peak_26816	chr12	109417233	109418364	75.2791553447245	3.92814840677795	0.383404812050517	10.2454332426594	1.24067788482292e-24	7.18198887574352e-21	1410.5	182	standard ATAC in FFPE kidney
peak_4033	chr1	107886471	107887536	75.9995603241923	3.81424055711858	0.374441404042778	10.1864818258261	2.27861542843579e-24	1.25908002701076e-20	1322.5	186.5	standard ATAC in FFPE kidney
peak_107893	chr8	48760059	48761160	73.8717070737093	3.96750230936722	0.390437881204178	10.161673598706	2.93986073614465e-24	1.55383143708125e-20	1339.5	172.5	standard ATAC in FFPE kidney
peak_50257	chr17	34256068	34256956	78.8120582116968	3.58742217643388	0.353571228063665	10.1462502932731	3.44340457201268e-24	1.74414180580062e-20	1147	185.5	standard ATAC in FFPE kidney
peak_49411	chr17	26056477	26057883	97.3706637129848	3.08094677489125	0.304727509597708	10.1104976671079	4.96315146140166e-24	2.40660086096349e-20	2163.5	499.5	standard ATAC in FFPE kidney
peak_16006	chr11	23154898	23156258	85.3198107098406	3.34017774848674	0.330483924176589	10.1069295785231	5.147216477333e-24	2.40660086096349e-20	1858	371	standard ATAC in FFPE kidney
peak_34227	chr14	22319285	22320694	83.8876052786703	3.35577814383808	0.332560394690369	10.0907329838915	6.07144451218308e-24	2.72402212898073e-20	1907.5	368.5	standard ATAC in FFPE kidney
peak_12234	chr10	80084565	80085689	97.3844176908487	3.08111853124538	0.305439049424327	10.0875069414094	6.27427689212764e-24	2.72402212898073e-20	1719	403	standard ATAC in FFPE kidney
peak_42588	chr15	88691887	88693100	92.089395921273	3.15737246510172	0.313245351962944	10.079550886601	6.80363860553051e-24	2.85199146014728e-20	1778.5	396.5	standard ATAC in FFPE kidney
peak_99430	chr7	20300535	20301803	99.8098639970664	3.02843101447863	0.300731690178984	10.0702091378405	7.48188194837046e-24	3.03175832390569e-20	1994.5	473.5	standard ATAC in FFPE kidney
peak_36778	chr14	68333164	68334700	88.7550026645425	3.20617049334025	0.319098304624676	10.047594884941	9.41368711190363e-24	3.69150148410146e-20	2172	470.5	standard ATAC in FFPE kidney
peak_101133	chr7	71083405	71084621	75.3803061837426	3.62553762868899	0.36175574080648	10.0220596931134	1.21934924551714e-23	4.63215536506393e-20	1495	242.5	standard ATAC in FFPE kidney
peak_79339	chr4	71861337	71862715	75.0662083545712	3.61907972831365	0.361628434381512	10.0077299908767	1.40949488978906e-23	5.19223747825204e-20	1695.5	280.5	standard ATAC in FFPE kidney
peak_6420	chr1	166388136	166389283	79.3298302521272	3.40101779308946	0.34155356388579	9.9574946734466	2.33882139100145e-23	8.36224951693235e-20	1468.5	278.5	standard ATAC in FFPE kidney
peak_40097	chr15	38228166	38229544	73.3474130499572	3.63975823330111	0.366223248017718	9.93863238612591	2.82681296990146e-23	9.81824833923146e-20	1649.5	256	standard ATAC in FFPE kidney
peak_89031	chr5	111199147	111200311	80.3533298784753	3.33078601389126	0.337159011065684	9.87897669815616	5.13546368579121e-23	1.73413196527645e-19	1492.5	294	standard ATAC in FFPE kidney
peak_71502	chr3	40752941	40754157	75.6617466070875	3.47220579915069	0.351658152064235	9.87381005891325	5.40708870469395e-23	1.77650630080382e-19	1498	260	standard ATAC in FFPE kidney
peak_89438	chr5	115607957	115609115	75.6562450159419	3.47212317741265	0.352169583649716	9.85923639807062	6.25230605931304e-23	2.00014561524824e-19	1435	254.5	standard ATAC in FFPE kidney
peak_61597	chr2	17977803	17978960	68.4607600950756	3.92244318465805	0.39818285455407	9.85085907089305	6.79605782580602e-23	2.11834865009303e-19	1330	170.5	standard ATAC in FFPE kidney
peak_99242	chr7	17199877	17201361	76.3821515865552	3.38850439089616	0.345212119535133	9.81571676990706	9.6350792295663e-23	2.92819692865749e-19	1827.5	342.5	standard ATAC in FFPE kidney
peak_108851	chr8	74684334	74685572	88.9614276713743	3.06694503580858	0.312890658570274	9.80197059836403	1.10410291382597e-22	3.27363821015463e-19	1730	411	standard ATAC in FFPE kidney
peak_22488	chr11	120433974	120435185	86.7142092850855	3.09610380111728	0.316224655117296	9.7908362014621	1.23272140221532e-22	3.56796534616435e-19	1669.5	386	standard ATAC in FFPE kidney
peak_15800	chr11	20442028	20443794	75.7845516696411	3.37579113104651	0.345917235597027	9.75895614226954	1.68884521983547e-22	4.77448326288555e-19	2148	402.5	standard ATAC in FFPE kidney
peak_46898	chr16	64851142	64852553	64.3305943013174	4.44449557991763	0.456920094687486	9.72707401489418	2.3114609709826e-22	6.38614639719383e-19	1536	135.5	standard ATAC in FFPE kidney
peak_2741	chr1	75313438	75315128	88.5393048788163	3.0251722477862	0.31134428278773	9.71648562388637	2.56481156474521e-22	6.92863895681527e-19	2366	576.5	standard ATAC in FFPE kidney
peak_15763	chr11	20100629	20101881	75.6593479525615	3.32635521618968	0.343066493628576	9.69594897189519	3.1370765791407e-22	8.29033863623174e-19	1527	301.5	standard ATAC in FFPE kidney
peak_26684	chr12	106270280	106271251	78.1040498277887	3.24223733176738	0.334548168762051	9.69139165748487	3.28028091949326e-22	8.48434190845273e-19	1212	259.5	standard ATAC in FFPE kidney
peak_60940	chr2	3200726	3201810	72.93939637631	3.41437451381789	0.352666487372843	9.6815961710821	3.61034648625349e-22	9.14350333864415e-19	1274	239.5	standard ATAC in FFPE kidney
peak_78354	chr4	47365619	47366625	64.4176541723434	3.98232522386582	0.41181323472284	9.67022156669154	4.03503539801414e-22	9.99908541978932e-19	1080.5	135	standard ATAC in FFPE kidney
peak_12249	chr10	80164170	80165641	86.8232603697751	3.02763187594143	0.313151333647652	9.66827073886271	4.11268361512838e-22	9.99908541978932e-19	2010.5	480	standard ATAC in FFPE kidney
peak_85797	chr5	34529730	34531056	74.2525736618027	3.34351362727335	0.346064715350583	9.66152710450755	4.39266390554288e-22	1.04570329260766e-18	1585.5	310.5	standard ATAC in FFPE kidney
peak_38456	chr14	120876071	120878032	78.3046211024282	3.20363465251742	0.332165474494237	9.64469488406447	5.17649038540065e-22	1.18731108907707e-18	2441	523	standard ATAC in FFPE kidney
peak_78009	chr4	43058390	43059322	73.7210627944269	3.38135465331418	0.350677950368345	9.64233608004859	5.29685929966244e-22	1.19242111834105e-18	1120	214	standard ATAC in FFPE kidney
peak_32997	chr13	112279612	112281023	64.6316424347186	3.90866116763285	0.405607313597495	9.63656481675677	5.60316902990349e-22	1.23844298172943e-18	1498	199.5	standard ATAC in FFPE kidney
peak_97404	chr6	124869598	124870407	76.3690867398663	3.25006072549846	0.337708650512201	9.62385985839895	6.34061670524745e-22	1.37641201635125e-18	992.5	209	standard ATAC in FFPE kidney
peak_50259	chr17	34259085	34259847	65.3413812220234	3.77815036766713	0.393066514998865	9.61198734437615	7.1162011258854e-22	1.51767346257392e-18	818	119	standard ATAC in FFPE kidney
peak_71125	chr3	30992697	30994184	64.0213089321166	4.7995486378269	0.499532170530822	9.60808716829332	7.39092108822806e-22	1.52533972944824e-18	1633	123.5	standard ATAC in FFPE kidney
peak_108602	chr8	72519768	72521047	79.6198752032372	3.14835970501432	0.327683878510515	9.60791760438494	7.40309993398097e-22	1.52533972944824e-18	1622.5	359.5	standard ATAC in FFPE kidney
peak_1020	chr1	37921328	37922749	85.9002224512702	3.01035753350137	0.313469194804508	9.60336002195926	7.73799039338311e-22	1.56776844030204e-18	1930.5	471	standard ATAC in FFPE kidney
peak_12339	chr10	80755164	80756198	81.2337333301657	3.10178221579595	0.323804185431025	9.5791912376521	9.78078097952422e-22	1.94916534261456e-18	1339	302	standard ATAC in FFPE kidney
peak_19656	chr11	87405004	87406146	77.3809092036668	3.18514521076732	0.333196256019758	9.55936674924237	1.18479412609707e-21	2.29408584532508e-18	1410.5	307.5	standard ATAC in FFPE kidney
peak_108104	chr8	59990023	59991321	72.2337714960094	3.34841395251895	0.350288827537795	9.55900870734356	1.18889974215623e-21	2.29408584532508e-18	1504	292.5	standard ATAC in FFPE kidney
peak_103321	chr7	112548267	112549630	83.071908921504	3.02651510144028	0.317525812887788	9.53155610851025	1.54943015210479e-21	2.94304573453855e-18	1780.5	436.5	standard ATAC in FFPE kidney
peak_59619	chr19	42054987	42056398	73.2376785632197	3.27434661667801	0.343787722095316	9.5243268046966	1.66115058794178e-21	3.1067093857316e-18	1655	341.5	standard ATAC in FFPE kidney
peak_75768	chr3	135100533	135102549	71.3076457918034	3.32827120920173	0.350077476238577	9.50724178248337	1.95784755884456e-21	3.60611788853607e-18	2316.5	446.5	standard ATAC in FFPE kidney
peak_52001	chr17	71312844	71313391	76.6085061426529	3.21076003132571	0.337949746841058	9.50070257882388	2.08478908235312e-21	3.78261641801753e-18	660.5	138	standard ATAC in FFPE kidney
peak_60245	chr19	53216587	53217638	80.5191820828903	3.04967353897882	0.322245859182307	9.46380985846431	2.96922965363971e-21	5.23118019731968e-18	1342.5	323.5	standard ATAC in FFPE kidney
peak_52263	chr17	74926503	74928266	72.3228930314331	3.25433394585935	0.344145402193418	9.45627611212524	3.19105507088085e-21	5.54167740909372e-18	2043	431.5	standard ATAC in FFPE kidney
peak_8426	chr10	5958865	5960135	61.8931244206325	3.84165990755459	0.40668415917908	9.44629836408984	3.51025069368477e-21	5.9802127031351e-18	1293.5	180	standard ATAC in FFPE kidney
peak_30289	chr13	54794957	54796423	74.7480023475227	3.17205527032561	0.335832242846616	9.44535653705646	3.54196402410029e-21	5.9802127031351e-18	1745	382	standard ATAC in FFPE kidney
peak_51665	chr17	64680701	64682310	73.1214012131149	3.22556690330131	0.341788758880035	9.43731126170085	3.8246750878087e-21	6.36907948458051e-18	1887.5	394	standard ATAC in FFPE kidney
peak_38353	chr14	119336515	119337648	62.0796047272799	3.77113713095456	0.400175261129595	9.42371380057224	4.35409014172934e-21	7.15271099985386e-18	1161.5	170	standard ATAC in FFPE kidney
peak_13342	chr10	96078988	96080010	65.5395538421368	3.52264112668882	0.373978331762707	9.41937226706485	4.53792826160292e-21	7.35531614924663e-18	1085	188.5	standard ATAC in FFPE kidney
peak_86657	chr5	53981208	53982155	62.0988602962893	3.77147330314568	0.401071860108285	9.4034852061858	5.27850256854887e-21	8.22661392619326e-18	959.5	140	standard ATAC in FFPE kidney
peak_53158	chr17	88464998	88466041	61.7737592848267	3.76349971691637	0.400403226087354	9.39927421088088	5.49407328082897e-21	8.34851905388367e-18	1062	157.5	standard ATAC in FFPE kidney
peak_47940	chr16	94790444	94791706	59.0421153951091	4.2102796387847	0.448558826860485	9.38623740447364	6.21819463212894e-21	9.2183977104893e-18	1256	129	standard ATAC in FFPE kidney
peak_105439	chr7	146574197	146575262	69.7925095475299	3.29388046504852	0.351085164532594	9.38199843742677	6.47339419126255e-21	9.41338489369104e-18	1194.5	242	standard ATAC in FFPE kidney
peak_35277	chr14	41779914	41781071	75.758084986135	3.108844825948	0.331380654697207	9.3814915924668	6.50459289814457e-21	9.41338489369104e-18	1396.5	321.5	standard ATAC in FFPE kidney
peak_85085	chr5	20387577	20388978	67.8648905815582	3.35209690029764	0.357947469963715	9.36477327423892	7.62137433130301e-21	1.08998205789473e-17	1524	294.5	standard ATAC in FFPE kidney
peak_13441	chr10	98376006	98378018	58.9395920228682	4.10916788430312	0.438848713715257	9.36351812339894	7.71249136025819e-21	1.09018755781212e-17	1989	227.5	standard ATAC in FFPE kidney
peak_57683	chr19	6996042	6997114	78.1917836790711	3.04015345432608	0.324747682872719	9.36158628579851	7.85484136656e-21	1.0975470527408e-17	1332	312.5	standard ATAC in FFPE kidney
peak_94730	chr6	71390052	71391635	71.9145242167391	3.19889659443294	0.341816792878662	9.35851210671349	8.08674157154227e-21	1.1171098322761e-17	1822.5	385	standard ATAC in FFPE kidney
peak_27555	chr12	119539332	119541627	67.5535435479595	3.3448594747898	0.357983532977696	9.34361267113984	9.310197010543e-21	1.271668302685e-17	2504.5	479	standard ATAC in FFPE kidney
peak_86887	chr5	65193968	65195036	58.4410755514472	4.53214437788937	0.485904817234027	9.32722668544063	1.08677252180755e-20	1.4679157204557e-17	1060	88.5	standard ATAC in FFPE kidney
peak_100322	chr7	38869474	38870570	73.7337812291962	3.10692177704298	0.334362538372658	9.29207497994351	1.51309279621409e-20	2.02129244702164e-17	1284.5	292.5	standard ATAC in FFPE kidney
peak_56526	chr18	73731087	73732808	65.8350852334738	3.3575813391642	0.362274946305562	9.26804730331045	1.8958482012386e-20	2.5050748992975e-17	1827	347.5	standard ATAC in FFPE kidney
peak_6563	chr1	167932314	167933768	62.589124380992	3.51209769052422	0.379486282004763	9.25487390998796	2.14483410062254e-20	2.74457486955872e-17	1476.5	262	standard ATAC in FFPE kidney
peak_84428	chr4	154596970	154598248	72.8296618895725	3.08720635416571	0.334600631398957	9.22654073083537	2.79513111001827e-20	3.53945123185689e-17	1473.5	344	standard ATAC in FFPE kidney
peak_85985	chr5	36826504	36827528	57.3215954162256	3.97359497570879	0.430896047262083	9.22170208094747	2.92420956655953e-20	3.66472795617776e-17	980	127	standard ATAC in FFPE kidney
peak_27058	chr12	112615471	112616477	59.0431566673309	3.69328069159594	0.401897987760204	9.18959737066305	3.94314488582417e-20	4.84186328182151e-17	975	151.5	standard ATAC in FFPE kidney
peak_37952	chr14	103498058	103499283	62.9926807357154	3.40106314501392	0.371042171120324	9.16624418929188	4.8978661598708e-20	5.95030746469859e-17	1245	230	standard ATAC in FFPE kidney
peak_77866	chr4	40800680	40801601	63.7963535184146	3.36378408747739	0.367015435431072	9.16523874132573	4.94374201189955e-20	5.95030746469859e-17	952.5	184.5	standard ATAC in FFPE kidney
peak_49835	chr17	29627088	29627974	56.1979862230812	4.03638043523456	0.440536966118708	9.16241029849675	5.07508663415359e-20	6.04850815288478e-17	834	101.5	standard ATAC in FFPE kidney
peak_96631	chr6	113025597	113027761	62.6813337021168	3.39328990238533	0.371279197165767	9.13945604356149	6.27672431556657e-20	7.40799723007315e-17	2192.5	427	standard ATAC in FFPE kidney
peak_58093	chr19	14672290	14673527	72.7323031183489	3.04317046710105	0.333184893379351	9.133578765338	6.62714971232616e-20	7.74637334258862e-17	1409.5	344	standard ATAC in FFPE kidney
peak_41168	chr15	68194447	68195655	67.5676496668702	3.19341334960891	0.350538814424753	9.11001355113675	8.23716819759084e-20	9.53660109306603e-17	1290.5	283	standard ATAC in FFPE kidney
peak_89939	chr5	122286556	122287445	56.3008617363689	3.85849164617729	0.423713431491463	9.10637086154074	8.51837644690174e-20	9.76913126784116e-17	828	115.5	standard ATAC in FFPE kidney
peak_12354	chr10	80840961	80841960	67.7462145769274	3.14983833022855	0.346527816920305	9.08971279195446	9.93010198344806e-20	1.11284741137772e-16	1077.5	245	standard ATAC in FFPE kidney
peak_117569	chr9	109833615	109834599	61.2687208300841	3.41670744879573	0.375950137925197	9.08819309829739	1.00698574620405e-19	1.11284741137772e-16	977.5	182	standard ATAC in FFPE kidney
peak_100548	chr7	51845822	51846498	59.1470431510032	3.5535483755015	0.391425351923623	9.07848292921733	1.10098666560888e-19	1.19500306266141e-16	650	109.5	standard ATAC in FFPE kidney
peak_47860	chr16	93711057	93712417	65.0235122051031	3.23181870924402	0.356380427262343	9.06845174991886	1.2072010730216e-19	1.26622815550566e-16	1409	302	standard ATAC in FFPE kidney
peak_39936	chr15	36538507	36540036	63.3989878860117	3.29801437851775	0.363683861083069	9.06835505071932	1.20827272908637e-19	1.26622815550566e-16	1559	316.5	standard ATAC in FFPE kidney
peak_101282	chr7	73834175	73835329	71.5092583386646	3.01551536366484	0.333112599685969	9.05254069196905	1.39679775809613e-19	1.45128480910425e-16	1294.5	319	standard ATAC in FFPE kidney
peak_116569	chr9	94438179	94439676	55.6004014570856	3.75532064532266	0.417205348670499	9.00113255328504	2.23401030267112e-19	2.30148498672806e-16	1370	200.5	standard ATAC in FFPE kidney
peak_11525	chr10	70061807	70062943	54.27655797943	3.88997237959443	0.432857731630916	8.98672264657914	2.54712376265781e-19	2.59076339159636e-16	1020.5	140	standard ATAC in FFPE kidney
peak_28082	chr13	14155059	14156485	64.9041470692973	3.17835628012786	0.353755998641305	8.98460038087041	2.59676233541639e-19	2.60886625241783e-16	1488.5	318	standard ATAC in FFPE kidney
peak_12081	chr10	79143873	79145113	61.6612740025165	3.3095957943967	0.368519482286262	8.98078922141175	2.68831406464899e-19	2.67870664717205e-16	1239.5	244	standard ATAC in FFPE kidney
peak_76609	chr3	152058596	152059932	55.608653843804	3.75548054084619	0.418328937240629	8.97733865990241	2.77395019383333e-19	2.74156488913134e-16	1206.5	175	standard ATAC in FFPE kidney
peak_7119	chr1	179371131	179372715	57.6113033772073	3.5132355100227	0.392338658753006	8.9545993789881	3.40971508849527e-19	3.23827035170186e-16	1490.5	262	standard ATAC in FFPE kidney
peak_91405	chr5	143579246	143579838	62.6820228332917	3.22580310741574	0.360647142571177	8.94448541701422	3.73686705088787e-19	3.49437312441641e-16	593	126.5	standard ATAC in FFPE kidney
peak_25173	chr12	77504447	77505762	67.5628372068996	3.0532425331561	0.342537788614414	8.913593287055	4.94048033137056e-19	4.44877445187208e-16	1390	340	standard ATAC in FFPE kidney
peak_100573	chr7	52070919	52072189	58.3292945512305	3.40111980214324	0.382199010944091	8.89881895230954	5.64440788676625e-19	5.04527059078568e-16	1196.5	225.5	standard ATAC in FFPE kidney
peak_12315	chr10	80599118	80600883	53.5623437222829	3.78116247769115	0.42536011878428	8.88932062671525	6.14836734106032e-19	5.45562136823837e-16	1563.5	220	standard ATAC in FFPE kidney
peak_18199	chr11	69445886	69446910	62.0813351306766	3.21035179827906	0.361222304729981	8.88746834356987	6.25170246265121e-19	5.5071156389111e-16	1014.5	216.5	standard ATAC in FFPE kidney
peak_77693	chr4	33334245	33336302	67.7496545036751	3.01334810427365	0.339162250404795	8.88468012190973	6.41049475771884e-19	5.60636967429736e-16	2202	541	standard ATAC in FFPE kidney
peak_38637	chr14	122277305	122278175	65.8278741189772	3.056686754956	0.34491590290961	8.86212183657142	7.85057347466492e-19	6.76841924733452e-16	902.5	209.5	standard ATAC in FFPE kidney
peak_91115	chr5	139625213	139626525	61.2470666065487	3.24320014484283	0.366047851066496	8.86004421387431	7.99827115325721e-19	6.84719601742647e-16	1297.5	264	standard ATAC in FFPE kidney
peak_62354	chr2	29820535	29821392	51.3450319462479	4.21536851942245	0.476704751660622	8.84272393916365	9.34128264479026e-19	7.94100477923975e-16	730.5	79.5	standard ATAC in FFPE kidney
peak_51463	chr17	56601201	56602309	64.7070157214056	3.07592672347502	0.347976495226385	8.8394669343224	9.61763681626801e-19	8.11915556897781e-16	1134.5	263	standard ATAC in FFPE kidney
peak_52797	chr17	84587080	84588345	61.4696442457704	3.19453607899669	0.361453611236729	8.83802507344287	9.74254153432861e-19	8.16787806261465e-16	1240	271	standard ATAC in FFPE kidney
peak_51484	chr17	56811979	56813155	59.0390333385353	3.29807775905398	0.373550137108906	8.8290096332971	1.05606627696935e-18	8.73330890431989e-16	1109.5	221	standard ATAC in FFPE kidney
peak_109501	chr8	87502394	87502918	62.7824845411349	3.12493934086015	0.354530993420101	8.81429098966606	1.20444849667398e-18	9.82668302346816e-16	522.5	116	standard ATAC in FFPE kidney
peak_24786	chr12	72116041	72117279	65.7140105743169	3.00847692117404	0.342731419036225	8.77794317671257	1.66491348492179e-18	1.29739450564765e-15	1283.5	318	standard ATAC in FFPE kidney
peak_38497	chr14	121309860	121310949	50.1216501764354	4.17873380360242	0.477247832876989	8.75589896011009	2.02483052511903e-18	1.5578892275669e-15	909	96	standard ATAC in FFPE kidney
peak_96519	chr6	108778005	108779116	62.1845476340925	3.10945303576711	0.355502480157752	8.74664231424576	2.19795018709836e-18	1.68045041851839e-15	1090.5	246	standard ATAC in FFPE kidney
peak_108770	chr8	73895017	73895906	62.9693018379104	3.08015657127085	0.353155786942828	8.72180687717143	2.73797024372351e-18	2.05241812980823e-15	896.5	208.5	standard ATAC in FFPE kidney
peak_111530	chr8	124176515	124177394	50.9315136814551	3.79175757784913	0.435511479819801	8.70644691023535	3.13548723045526e-18	2.29615885351243e-15	733.5	108	standard ATAC in FFPE kidney
peak_27087	chr12	112775726	112777247	58.0244752300806	3.21234321445436	0.370740537691249	8.66466676252595	4.52835582758826e-18	3.18199449609791e-15	1410.5	300.5	standard ATAC in FFPE kidney
peak_71515	chr3	40886545	40887916	58.5278041614721	3.17015647164575	0.36669301380185	8.64526007402695	5.36828849033756e-18	3.66623944965952e-15	1279	283.5	standard ATAC in FFPE kidney
peak_51477	chr17	56723550	56724896	56.0886038773905	3.27677004500185	0.37943665155955	8.63588172500932	5.82757822865206e-18	3.95767441222268e-15	1215	253	standard ATAC in FFPE kidney
peak_29831	chr13	48640823	48642697	59.0225437160171	3.12973036285178	0.363268687544919	8.61546967894056	6.9655454737559e-18	4.57707875660358e-15	1761.5	405	standard ATAC in FFPE kidney
peak_107008	chr8	27229056	27230424	52.8512324017553	3.44706498063864	0.400489838586307	8.60712220016984	7.49175705349395e-18	4.89638685188676e-15	1171.5	211.5	standard ATAC in FFPE kidney
peak_80778	chr4	106925680	106926724	52.5512255405759	3.43777057566689	0.401051983350289	8.57188274434802	1.01806720556242e-17	6.58299583920158e-15	888.5	157	standard ATAC in FFPE kidney
peak_9733	chr10	33738961	33740163	60.8586424920391	3.02487551481269	0.353135389513193	8.56576713815788	1.07358655221337e-17	6.86891977017189e-15	1150.5	282.5	standard ATAC in FFPE kidney
peak_10111	chr10	42221338	42222519	56.7949178888661	3.17869564230631	0.37148646525553	8.55669301469658	1.16151292764186e-17	7.30223294536781e-15	1067.5	234	standard ATAC in FFPE kidney
peak_106265	chr8	11554916	11556604	59.2396197640933	3.08257939502509	0.360269563533949	8.55631368019967	1.16533940262031e-17	7.30223294536781e-15	1578.5	363	standard ATAC in FFPE kidney
peak_57624	chr19	6276326	6277086	60.5552108550305	3.01701309404359	0.353564423657322	8.53313538402753	1.42433843026279e-17	8.78925263636881e-15	724.5	178	standard ATAC in FFPE kidney
peak_12135	chr10	79422224	79423132	59.7267809121764	3.04456449484149	0.357210623927306	8.52316334091193	1.55253594103785e-17	9.5319433907235e-15	859	205	standard ATAC in FFPE kidney
peak_109118	chr8	81818215	81819503	58.6196764924687	3.06569647529519	0.360233800532271	8.51029656507914	1.73489043351557e-17	1.05980010381852e-14	1192.5	283	standard ATAC in FFPE kidney
peak_90485	chr5	130416606	130418183	57.0037415502239	3.12807136422711	0.367795028994603	8.50493105569682	1.81703541821447e-17	1.10066304020841e-14	1421.5	318	standard ATAC in FFPE kidney
peak_78627	chr4	55362039	55363579	56.1890655852336	3.16121494097258	0.371745861978036	8.50369907052081	1.83643204599261e-17	1.10066304020841e-14	1381.5	297.5	standard ATAC in FFPE kidney
peak_42589	chr15	88694158	88694695	60.2607055849968	3.00877506829395	0.354679024780167	8.48309276298145	2.19285696447151e-17	1.30035348306837e-14	505	126.5	standard ATAC in FFPE kidney
peak_31068	chr13	69672867	69674611	52.6400100858715	3.30343025772888	0.390910695941582	8.45060084573013	2.89807464717184e-17	1.66967557539714e-14	1477.5	293	standard ATAC in FFPE kidney
peak_84462	chr4	154937177	154938385	51.0216613381821	3.3915139241677	0.401973103573247	8.43716630296808	3.25123709287621e-17	1.84688498111404e-14	998.5	188.5	standard ATAC in FFPE kidney
peak_42445	chr15	85565204	85566369	48.3877283607347	3.62330625563682	0.429587859038247	8.43437769342133	3.32969768285331e-17	1.8739415236962e-14	924.5	155.5	standard ATAC in FFPE kidney
peak_5717	chr1	154613112	154614086	49.6981548506547	3.50001664410726	0.415613312331431	8.42132949128484	3.72235773372236e-17	2.05683952519193e-14	790.5	137.5	standard ATAC in FFPE kidney
peak_3749	chr1	94076410	94078053	56.8929657912646	3.0702646256032	0.364707626894053	8.41842725294885	3.81571989491632e-17	2.09888766201633e-14	1483	355	standard ATAC in FFPE kidney
peak_96056	chr6	97155319	97156039	56.1027099963012	3.10231884545815	0.369932472919439	8.38617605255148	5.02211064939858e-17	2.72548151331915e-14	634	151.5	standard ATAC in FFPE kidney
peak_35395	chr14	45838733	45839780	56.2836887118029	3.05313302014114	0.365210801449901	8.35991982717947	6.27608928359846e-17	3.31587428416783e-14	935	228	standard ATAC in FFPE kidney
peak_79306	chr4	70195671	70196661	47.7867036679914	3.60401847740877	0.431127415443118	8.35952052296308	6.29736706236247e-17	3.31587428416783e-14	769.5	128	standard ATAC in FFPE kidney
peak_75899	chr3	137526475	137527754	54.6735923508319	3.11722589394049	0.373063432854202	8.35575298841669	6.50166322096504e-17	3.39213814503603e-14	1101.5	255.5	standard ATAC in FFPE kidney
peak_2316	chr1	66863284	66864580	47.4701920333754	3.59346900908576	0.430619162703321	8.34488875628954	7.12809495682862e-17	3.69159099833926e-14	1008	157	standard ATAC in FFPE kidney
peak_31631	chr13	91599594	91601075	49.3028660335681	3.41095148888829	0.409391555860792	8.33175828875214	7.96504398592826e-17	4.00108515332803e-14	1178	215	standard ATAC in FFPE kidney
peak_2862	chr1	78653996	78654907	45.6481842253455	3.81604570608036	0.458409847488938	8.32452820763727	8.46652682473098e-17	4.21813470049835e-14	684.5	99.5	standard ATAC in FFPE kidney
peak_55580	chr18	56866858	56867767	47.1781005687861	3.58368385451387	0.431170406626029	8.31152555797305	9.4479493616996e-17	4.6499211182415e-14	699	117	standard ATAC in FFPE kidney
peak_12192	chr10	79792066	79793124	50.2988577041884	3.29872248127857	0.398196843500883	8.28415025161107	1.18955352086889e-16	5.76123044664965e-14	864	171.5	standard ATAC in FFPE kidney
peak_69454	chr2	167486820	167487507	51.6367921498361	3.20714958696356	0.387577132463633	8.27486793809873	1.28598069222447e-16	6.15889199002301e-14	564.5	121.5	standard ATAC in FFPE kidney
peak_45276	chr16	30063723	30064606	47.6594231355955	3.5153444231965	0.42482599753304	8.27478648578492	1.28686006175006e-16	6.15889199002301e-14	691.5	119	standard ATAC in FFPE kidney
peak_100698	chr7	52962185	52962519	54.389753272961	3.10865300608701	0.377213647202084	8.2410936856206	1.70643541894109e-16	8.07163872638732e-14	284.5	67.5	standard ATAC in FFPE kidney
peak_66488	chr2	118726775	118727700	44.1371713098676	4.542777632956	0.551477242869764	8.23747070562042	1.75889369217275e-16	8.25552713495321e-14	690.5	57.5	standard ATAC in FFPE kidney
peak_97903	chr6	134869727	134870866	53.4498735908912	3.08108143010671	0.374137612437964	8.23515553549854	1.79324504233075e-16	8.38438616638057e-14	966	231.5	standard ATAC in FFPE kidney
peak_112862	chr9	21419859	21421303	54.2707251272834	3.04851907756281	0.370264974782339	8.23334445650683	1.82057724418958e-16	8.47016294720017e-14	1236	300	standard ATAC in FFPE kidney
peak_13239	chr10	94976916	94978320	47.576155332364	3.43155960742807	0.416804508996427	8.23301939724812	1.82552621842523e-16	8.47016294720017e-14	1077	197.5	standard ATAC in FFPE kidney
peak_46688	chr16	56717091	56718342	52.6382854116019	3.11463234836264	0.378372445463805	8.23165742036198	1.84640669724196e-16	8.53447086477268e-14	1047.5	239	standard ATAC in FFPE kidney
peak_115077	chr9	63605494	63606398	51.0110102969377	3.18809742674938	0.387944133853889	8.2179292030489	2.07047127328759e-16	9.32202851355307e-14	739	164	standard ATAC in FFPE kidney
peak_56143	chr18	65590012	65591166	50.2045867186658	3.2277041522282	0.39290661884148	8.21493962546463	2.12271029524373e-16	9.52196141442836e-14	930.5	201	standard ATAC in FFPE kidney
peak_26017	chr12	88225406	88226145	49.9014920717855	3.21801741501533	0.393151373025371	8.18518676471126	2.71881671014063e-16	1.20624173193991e-13	589	126.5	standard ATAC in FFPE kidney
peak_14080	chr10	116387117	116387837	44.2482840589551	4.72306301174462	0.577318828437318	8.18103061791518	2.81426380159542e-16	1.23954045209111e-13	541	42.5	standard ATAC in FFPE kidney
peak_70094	chr2	179853206	179854435	52.8412704916859	3.06232421173228	0.374427314712915	8.1786880694862	2.86950865433551e-16	1.25931028900954e-13	1028.5	246.5	standard ATAC in FFPE kidney
peak_102373	chr7	91837873	91839031	52.0372607188585	3.09632879353889	0.3791950077234	8.16553153515532	3.20022920641981e-16	1.38445787633174e-13	947	222.5	standard ATAC in FFPE kidney
peak_37960	chr14	103745491	103746594	51.2280863450138	3.13169072035485	0.383746393945557	8.16083426388925	3.32718446263729e-16	1.42920795765385e-13	891	209.5	standard ATAC in FFPE kidney
peak_46407	chr16	46496245	46497790	44.6195351488987	3.68098981052975	0.451301096825423	8.15639455880531	3.45173572488126e-16	1.47748873823755e-13	1151	185	standard ATAC in FFPE kidney
peak_30516	chr13	58502862	58504475	46.1549530834849	3.46474928944765	0.424870180276967	8.15484223248859	3.49635989578588e-16	1.49133857674146e-13	1213	211.5	standard ATAC in FFPE kidney
peak_102251	chr7	90014392	90015903	46.1635424603314	3.46463466221989	0.425257356969581	8.14714808677071	3.72607278971649e-16	1.58376333080103e-13	1123	204	standard ATAC in FFPE kidney
peak_93515	chr6	39156443	39157279	42.8143691044338	3.93774068872059	0.48422245886157	8.13209015124661	4.21950819826207e-16	1.75664484456688e-13	592	81.5	standard ATAC in FFPE kidney
peak_99594	chr7	26066377	26067732	50.1103157331432	3.15913098236677	0.388685636967577	8.12772760787736	4.37412777997386e-16	1.81480023701277e-13	1076	232	standard ATAC in FFPE kidney
peak_103864	chr7	120656560	120657792	52.2381689836262	3.0434364889127	0.375261035170512	8.11018518757168	5.05426722921462e-16	2.08276929305846e-13	1014	241.5	standard ATAC in FFPE kidney
peak_75828	chr3	136332116	136333903	46.3496857768505	3.39074162325291	0.418410216315163	8.10386910031585	5.32383857042217e-16	2.17908118510034e-13	1347	250	standard ATAC in FFPE kidney
peak_31543	chr13	85428283	85429883	48.4912930051974	3.24023742738114	0.399887847343791	8.10286546316435	5.3679589920585e-16	2.1897670030557e-13	1236	265.5	standard ATAC in FFPE kidney
peak_69406	chr2	167174261	167175288	48.4940438007702	3.24029764893552	0.400280489243693	8.09506767381512	5.72325253116019e-16	2.31913823565986e-13	788.5	161.5	standard ATAC in FFPE kidney
peak_101512	chr7	77506435	77507137	51.4252328438241	3.07755919064588	0.380196933181833	8.09464496436116	5.74316111517641e-16	2.31947387975184e-13	567	136	standard ATAC in FFPE kidney
peak_24441	chr12	56592454	56594063	52.7411609248896	3.00254530527943	0.371231706846693	8.08806265710323	6.06212204064673e-16	2.42413093338546e-13	1330	326.5	standard ATAC in FFPE kidney
peak_118307	chr9	120842177	120843022	43.7160897895314	3.648712006304	0.451222889647434	8.08627418958055	6.15176111165866e-16	2.44389767247606e-13	605.5	95.5	standard ATAC in FFPE kidney
peak_90704	chr5	135164253	135165529	51.9319865510449	3.0342114020248	0.375317241221767	8.08439119968898	6.24754918054169e-16	2.47386667291e-13	1037	255	standard ATAC in FFPE kidney
peak_10664	chr10	58785420	58786688	51.1142228003536	3.06756170007886	0.379657578810955	8.07981157569967	6.48669220897786e-16	2.5602215964032e-13	1028.5	248	standard ATAC in FFPE kidney
peak_26895	chr12	110030153	110031600	48.6832749029903	3.17876651850429	0.394574435300791	8.05618974295955	7.87094235367778e-16	3.04720775886142e-13	1119	252	standard ATAC in FFPE kidney
peak_67754	chr2	142726731	142727661	48.675022516272	3.1785896066268	0.394950005713149	8.04808092327362	8.41023352463238e-16	3.23538489933041e-13	724.5	160	standard ATAC in FFPE kidney
peak_43046	chr15	97597830	97598779	46.5505940416182	3.31987923314137	0.412540437346152	8.04740319397041	8.45692155888588e-16	3.24308268890979e-13	716.5	139.5	standard ATAC in FFPE kidney
peak_51500	chr17	56970055	56971329	45.7462472786626	3.36995612153135	0.419058518469214	8.04173157925895	8.85777551865342e-16	3.38612145644524e-13	939.5	179.5	standard ATAC in FFPE kidney
peak_70098	chr2	179905797	179906750	49.1869408245101	3.12965669598721	0.389551058051577	8.03400897340867	9.43382914251345e-16	3.58379376837658e-13	748	165.5	standard ATAC in FFPE kidney
peak_93386	chr6	37820156	37821425	48.3719278693916	3.16856495209921	0.395144358833992	8.01875284629937	1.06824202302303e-15	3.98342862842857e-13	980.5	224	standard ATAC in FFPE kidney
peak_11879	chr10	76424392	76425453	46.2389100178913	3.30960106440038	0.413510394853708	8.00367077971825	1.20763997527314e-15	4.38225510310758e-13	802	155.5	standard ATAC in FFPE kidney
peak_90018	chr5	122951941	122952911	42.428006654322	3.80913178724111	0.476250689785691	7.99816539678962	1.26286663604157e-15	4.55546349388005e-13	669	99.5	standard ATAC in FFPE kidney
peak_3843	chr1	95650975	95651982	41.0009506732505	4.27193046027118	0.534252629125518	7.99608692102014	1.2843572825715e-15	4.6192783638616e-13	686	73	standard ATAC in FFPE kidney
peak_26835	chr12	109513377	109515185	45.9499063390031	3.29915346634282	0.412689469926293	7.99427585814596	1.30337640300293e-15	4.66010732513672e-13	1335.5	273	standard ATAC in FFPE kidney
peak_88235	chr5	97425910	97427148	43.8189653028191	3.46830102784698	0.434845917058009	7.97593099485007	1.51236426532122e-15	5.32895795795678e-13	875	162.5	standard ATAC in FFPE kidney
peak_38090	chr14	106296213	106297317	49.3926767001669	3.07329614098888	0.385369357383232	7.97493646577777	1.52459228582843e-15	5.35651839983952e-13	858	206	standard ATAC in FFPE kidney
peak_32711	chr13	108680054	108682420	45.6413101009772	3.28849027073935	0.413205936311473	7.95847779945859	1.74168638830023e-15	6.06665799734469e-13	1738	351.5	standard ATAC in FFPE kidney
peak_21898	chr11	115674752	115675593	49.8905040404129	3.0287211928845	0.381417435226851	7.94069938382115	2.01044395225188e-15	6.92344500315999e-13	666	167.5	standard ATAC in FFPE kidney
peak_97403	chr6	124867733	124868397	41.1908709066456	3.76358120653921	0.474275834583512	7.93542688052875	2.09772549205437e-15	7.16314330663195e-13	448	67.5	standard ATAC in FFPE kidney
peak_10088	chr10	41996223	41997025	42.7070332722223	3.51719443068373	0.443784335099073	7.92545872512272	2.27305643647761e-15	7.69698698172603e-13	561	98.5	standard ATAC in FFPE kidney
peak_69905	chr2	173484411	173485724	47.165387863144	3.12759270748482	0.396029596021407	7.89737115333106	2.84847213095927e-15	9.59201291213108e-13	984.5	216.5	standard ATAC in FFPE kidney
peak_108887	chr8	75071939	75073006	47.1708894542896	3.12771449492232	0.396421596845499	7.88986906821153	3.02503739613929e-15	1.0106687730841e-12	792.5	183.5	standard ATAC in FFPE kidney
peak_40848	chr15	59479150	59480399	49.287065542225	3.00893919738241	0.38189731083518	7.87892219194236	3.30217034061409e-15	1.09082890023481e-12	970	244.5	standard ATAC in FFPE kidney
peak_101132	chr7	71081925	71082899	46.3472871223245	3.16836382807696	0.402176914395529	7.87803505041806	3.32569439755675e-15	1.09404468348088e-12	718.5	166.5	standard ATAC in FFPE kidney
peak_27026	chr12	112276907	112277978	42.0977561927606	3.49496805318606	0.444607525256531	7.86079374425686	3.81706867397985e-15	1.23409078798853e-12	729.5	133.5	standard ATAC in FFPE kidney
peak_41031	chr15	64143960	64144716	42.6041729098532	3.42366180951729	0.436142783978617	7.84986462067694	4.16486602410099e-15	1.32538684124035e-12	519	99	standard ATAC in FFPE kidney
peak_70086	chr2	179758698	179760084	43.9142624096449	3.30492032419752	0.421281813474796	7.84491572740356	4.33244329477786e-15	1.36797178360098e-12	983	197	standard ATAC in FFPE kidney
peak_109440	chr8	87162770	87164001	47.3628713520825	3.06874731302387	0.391448217549997	7.83947192870261	4.52445087185913e-15	1.41181890892364e-12	925.5	217.5	standard ATAC in FFPE kidney
peak_107933	chr8	49075538	49076700	41.2854940332149	3.559663411581	0.454419869014057	7.83342378779412	4.74760675050429e-15	1.45741936115733e-12	778	127.5	standard ATAC in FFPE kidney
peak_58359	chr19	21345795	21347531	42.2983274674	3.4123135171874	0.43655159351436	7.81651829447543	5.43044286379459e-15	1.63808028857153e-12	1186.5	227	standard ATAC in FFPE kidney
peak_12165	chr10	79610537	79611244	47.8720388647478	3.02242594594617	0.386754633414075	7.81484094777538	5.50324762218852e-15	1.65184393566352e-12	530.5	133	standard ATAC in FFPE kidney
peak_112360	chr9	3025358	3025933	58.2870489003465	-3.35894448517843	0.430250683755286	-7.8069474657451	5.85896766880274e-15	1.74568516100573e-12	54	1053.5	FFPE-ATAC in FFPE kidney
peak_29875	chr13	49063259	49064201	44.1254998764472	3.23490443399324	0.415084168013309	7.79336983502951	6.52452901787767e-15	1.89295428527275e-12	663.5	138	standard ATAC in FFPE kidney
peak_22391	chr11	119803670	119804612	41.9893942392459	3.40112465973557	0.437276623345195	7.77797046116197	7.36972713081976e-15	2.10798472689641e-12	637	124.5	standard ATAC in FFPE kidney
peak_67701	chr2	140220313	140221871	44.6346673891126	3.17867403747017	0.409064067107792	7.77060194982259	7.81140119638738e-15	2.2236725239595e-12	1103	245	standard ATAC in FFPE kidney
peak_114543	chr9	56924465	56924967	42.7909902066287	3.34513776547986	0.430890397377152	7.76331472189183	8.27379579098099e-15	2.32823081373799e-12	351	66.5	standard ATAC in FFPE kidney
peak_22980	chr12	11272336	11273505	41.1719674786829	3.46017879509647	0.446678253568955	7.74646799446732	9.44838141819228e-15	2.61636227499118e-12	785.5	137	standard ATAC in FFPE kidney
peak_91717	chr5	147887827	147888718	45.1242423426403	3.12519781375806	0.40375477755972	7.74033643055978	9.91540900599852e-15	2.73323532971702e-12	643	145.5	standard ATAC in FFPE kidney
peak_112352	chr9	3000017	3001585	53.2232035686305	-4.20307284210965	0.543572023766237	-7.73232002079117	1.05604062673694e-14	2.89788990403273e-12	69	2737.5	FFPE-ATAC in FFPE kidney
peak_51116	chr17	47831467	47832366	42.2037194917493	3.32326099959322	0.430401402851354	7.72130615183185	1.15143615449864e-14	3.13139115627455e-12	605	126.5	standard ATAC in FFPE kidney
peak_85714	chr5	33360818	33362029	41.3780403444679	3.37765593954108	0.438278201093543	7.70664826841383	1.29165154611502e-14	3.47385682637006e-12	813.5	154.5	standard ATAC in FFPE kidney
peak_58851	chr19	29325562	29326626	38.0457087521351	3.87902825583051	0.503918938486367	7.69772270810467	1.385125422311e-14	3.6908880718537e-12	670	85	standard ATAC in FFPE kidney
peak_91878	chr5	149864171	149864941	47.282691334552	3.00181455235758	0.389972605094743	7.69750108889903	1.38752907837611e-14	3.6908880718537e-12	566.5	141	standard ATAC in FFPE kidney
peak_5729	chr1	154749611	154751048	45.3437321961609	3.06435212393698	0.399250417836462	7.67526341122623	1.65079071749177e-14	4.32492937028383e-12	1027	249	standard ATAC in FFPE kidney
peak_109787	chr8	93431118	93432635	43.7112924804794	3.14558140035405	0.410212741721733	7.66817087921624	1.74466360751735e-14	4.50293602514308e-12	1055	235.5	standard ATAC in FFPE kidney
peak_35073	chr14	34259908	34261223	45.0354729482633	3.05307817285411	0.398662784306971	7.65829742086793	1.8841414526951e-14	4.82197413800899e-12	932.5	224	standard ATAC in FFPE kidney
peak_9873	chr10	39450798	39452671	40.77460184628	3.35433063067402	0.43874048418716	7.64536383481566	2.08355335661638e-14	5.25487718347953e-12	1235.5	245.5	standard ATAC in FFPE kidney
peak_8068	chr1	193730023	193731178	37.9290944119021	3.75098418247728	0.491602448562684	7.63011696431573	2.34540819526737e-14	5.86660909155314e-12	734.5	105.5	standard ATAC in FFPE kidney
peak_12910	chr10	90545141	90546408	45.5473912565014	3.00505469145039	0.394122720814665	7.62466747727418	2.44664234379555e-14	6.08228281965567e-12	901	217	standard ATAC in FFPE kidney
peak_50250	chr17	34168204	34169444	42.6017742553272	3.17873258948436	0.417052954482267	7.62189202910808	2.49984101499365e-14	6.2018504723814e-12	843.5	180	standard ATAC in FFPE kidney
peak_76215	chr3	144382380	144383923	44.7299644959383	3.04178471996285	0.39925937670126	7.61856802235812	2.56505306754473e-14	6.3434991224269e-12	1087	259.5	standard ATAC in FFPE kidney
peak_50258	chr17	34257834	34258552	41.7867613002087	3.22609728157156	0.424177041050158	7.60554431136711	2.83707275082995e-14	6.92541991730707e-12	478.5	103	standard ATAC in FFPE kidney
peak_112353	chr9	3001654	3002475	51.2071464692828	-3.83630098214533	0.504569158153443	-7.60312222844719	2.89070226104802e-14	7.03736498240004e-12	43.5	1357.5	FFPE-ATAC in FFPE kidney
peak_111955	chr8	128093454	128094311	40.9720853352184	3.27638391927204	0.431713245589749	7.58925965960642	3.21738445479001e-14	7.71436141739827e-12	563.5	117	standard ATAC in FFPE kidney
peak_22296	chr11	118901884	118902885	39.6650836211277	3.40084711798635	0.448138576741077	7.5888292026046	3.22808928282396e-14	7.72479223577188e-12	641	123	standard ATAC in FFPE kidney
peak_29344	chr13	42146285	42147824	42.2931780173013	3.16713787416348	0.41739221816668	7.58791787751713	3.25086830009378e-14	7.76401874327308e-12	1035.5	235	standard ATAC in FFPE kidney
peak_62451	chr2	30567473	30567963	40.1680755623911	3.33087550103	0.440009032355214	7.57001619535169	3.7317770231042e-14	8.77465651908392e-12	317	62.5	standard ATAC in FFPE kidney
peak_16013	chr11	23205557	23207070	42.7992577442656	3.11166821484624	0.411475443689525	7.56222093582362	3.96244586045213e-14	9.2632840111539e-12	1025.5	238.5	standard ATAC in FFPE kidney
peak_61676	chr2	19578539	19580551	44.1179366209039	3.0198154750297	0.399773516548768	7.55381572321166	4.22688117908123e-14	9.84361271367491e-12	1397	343	standard ATAC in FFPE kidney
peak_83869	chr4	148891762	148892695	41.9959219516947	3.15540997049741	0.417950765890833	7.54971692364739	4.36205290440466e-14	1.01389789535573e-11	620.5	139.5	standard ATAC in FFPE kidney
peak_77327	chr4	15192226	15193699	42.502001678659	3.10003611174989	0.411845467058721	7.52718278991739	5.1846766609604e-14	1.18028096182208e-11	984.5	231.5	standard ATAC in FFPE kidney
peak_2029	chr1	59969204	59970330	42.9998290189051	3.04735169553287	0.406035793576839	7.50513068980501	6.1367345570775e-14	1.3688183480671e-11	770	179	standard ATAC in FFPE kidney
peak_16911	chr11	49659778	49660847	40.3607314404404	3.25214512471486	0.433377967893785	7.50417733628747	6.18155734300858e-14	1.37378261241967e-11	695	140.5	standard ATAC in FFPE kidney
peak_108868	chr8	74842518	74843441	39.5618862686304	3.30670143306062	0.441191573003149	7.49493334732624	6.63320618013593e-14	1.45289923618386e-11	581.5	120.5	standard ATAC in FFPE kidney
peak_90426	chr5	129525234	129526551	40.0655521901502	3.24063585298993	0.432953911238623	7.4849441681192	7.15775586509369e-14	1.556575016072e-11	843.5	176.5	standard ATAC in FFPE kidney
peak_25064	chr12	76696802	76697903	41.3783924855147	3.13205727463398	0.418768665969102	7.47920637134077	7.47727766369092e-14	1.61738039485573e-11	727.5	161	standard ATAC in FFPE kidney
peak_78638	chr4	55545125	55546107	35.3089154123187	4.20525587038682	0.562396035414879	7.4773924522505	7.58117634236921e-14	1.63114711660844e-11	576.5	63	standard ATAC in FFPE kidney
peak_88342	chr5	100407740	100408661	42.7025729532985	3.03572205813334	0.406501581309015	7.46792189186011	8.14711764235936e-14	1.74059087711032e-11	617.5	151	standard ATAC in FFPE kidney
peak_121235	chrX	159197781	159198807	37.9407867253682	3.42654930531196	0.459279779811713	7.46070141976795	8.60630802247485e-14	1.82905109867855e-11	629	116	standard ATAC in FFPE kidney
peak_3511	chr1	91350890	91351784	37.9294465529489	3.42660117807804	0.459704755705159	7.45391718391481	9.06088866534983e-14	1.90567105486953e-11	551.5	97.5	standard ATAC in FFPE kidney
peak_109380	chr8	86495483	86497210	40.2606218736441	3.16630091768287	0.426547093992289	7.42309808759383	1.14411979503601e-13	2.3493881547932e-11	1112.5	248	standard ATAC in FFPE kidney
peak_76306	chr3	145650232	145651803	39.4483597140984	3.21597308922995	0.434236683564602	7.40603733160076	1.301292159908e-13	2.64090617908274e-11	993.5	206.5	standard ATAC in FFPE kidney
peak_41550	chr15	76487206	76487699	35.8019302925941	3.66128888270766	0.494609247748088	7.40238663020795	1.33758376780161e-13	2.70552467802055e-11	291.5	45.5	standard ATAC in FFPE kidney
peak_50332	chr17	34986881	34987680	37.6428566795052	3.41437014413302	0.46151746932748	7.39813846940272	1.38106800539968e-13	2.77960514914581e-11	478	93.5	standard ATAC in FFPE kidney
peak_41443	chr15	75578478	75579191	38.6419361358264	3.26904354077186	0.442167508562397	7.39322423621849	1.43310491550425e-13	2.87481791993991e-11	444	88	standard ATAC in FFPE kidney
peak_75022	chr3	121128905	121130239	38.6501885225448	3.26925799172205	0.442261225162332	7.39214248439273	1.4448157639203e-13	2.89353514868546e-11	821.5	162.5	standard ATAC in FFPE kidney
peak_44569	chr16	18248424	18249460	41.2727813275728	3.05315262446753	0.413830884747537	7.37777854915335	1.60952384656579e-13	3.20184062141972e-11	677.5	161	standard ATAC in FFPE kidney
peak_68908	chr2	160934318	160935309	41.6009701247364	3.06530016875024	0.415558550905338	7.37633761132374	1.62703119477414e-13	3.22130977461764e-11	644.5	149	standard ATAC in FFPE kidney
peak_79803	chr4	87678749	87679700	35.5125896235777	3.64841075719954	0.49550452668086	7.36302205277203	1.79792655292898e-13	3.5138769048273e-11	549	87	standard ATAC in FFPE kidney
peak_56790	chr18	76400177	76402117	38.0384976376385	3.24387572317036	0.443129598390874	7.3203770069744	2.47275258934281e-13	4.68220709923472e-11	1178	254.5	standard ATAC in FFPE kidney
peak_106177	chr8	11008718	11010323	40.6724306150859	3.02900401511108	0.4144594404426	7.30832433657783	2.70494258273658e-13	5.08228191851299e-11	1026.5	252.5	standard ATAC in FFPE kidney
peak_82606	chr4	134259978	134260665	38.5418265690301	3.17867519382635	0.435420856203989	7.30023642307384	2.87262509732359e-13	5.37242765124685e-11	423	93	standard ATAC in FFPE kidney
peak_48897	chr17	13896902	13897802	35.4045646601912	3.52773828623737	0.483278851734146	7.2995916820668	2.88642327584416e-13	5.38994100007249e-11	517	88.5	standard ATAC in FFPE kidney
peak_52057	chr17	71824381	71825411	35.404227670063	3.52810101350081	0.48378151124598	7.29275702251246	3.03675481116082e-13	5.636031478839e-11	590.5	104.5	standard ATAC in FFPE kidney
peak_27268	chr12	114252097	114253148	38.5469911700475	3.17915311210036	0.436741144547407	7.27926175903326	3.35651855439953e-13	6.17294737590051e-11	638.5	143.5	standard ATAC in FFPE kidney
peak_48288	chr17	4907841	4908896	37.7295644094844	3.23127737978211	0.44393049835392	7.27879114357672	3.36824666221045e-13	6.18515917288446e-11	636	142	standard ATAC in FFPE kidney
peak_19955	chr11	93746311	93747720	36.9176392400669	3.2875424148147	0.452721094768536	7.26173896645026	3.82145138500297e-13	6.9129600620015e-11	838	173.5	standard ATAC in FFPE kidney
peak_109384	chr8	86520453	86521394	33.3878241587957	3.95844318856747	0.545552666777458	7.2558405991299	3.99174955085304e-13	7.1782994437855e-11	516.5	62	standard ATAC in FFPE kidney
peak_84409	chr4	154460070	154461108	40.0579889346068	3.00441117358438	0.415522670488747	7.23043864261492	4.81436469876847e-13	8.49424427055283e-11	661.5	168	standard ATAC in FFPE kidney
peak_2761	chr1	75475317	75476427	34.7983753664305	3.50059496856561	0.484595887655868	7.22374055937414	5.05767071424198e-13	8.87201562346483e-11	622.5	111.5	standard ATAC in FFPE kidney
peak_100323	chr7	38892311	38893471	35.8053702193419	3.33501535797008	0.462966426242214	7.20357928552096	5.86521505722153e-13	1.01422333316654e-10	671	125.5	standard ATAC in FFPE kidney
peak_41139	chr15	67008118	67008822	38.442053992362	3.0918711082437	0.429289099957966	7.20230517976449	5.92029989267224e-13	1.01939849313429e-10	427.5	102	standard ATAC in FFPE kidney
peak_57195	chr18	84256577	84257817	38.442053992362	3.0918711082437	0.429289099957966	7.20230517976449	5.92029989267224e-13	1.01939849313429e-10	754	177	standard ATAC in FFPE kidney
peak_50423	chr17	35653389	35654309	39.259480752925	3.04713131760375	0.42313623474404	7.20130082796384	5.96407984923376e-13	1.025484303808e-10	568	139.5	standard ATAC in FFPE kidney
peak_40120	chr15	38399951	38400881	37.9497282432615	3.1532487100305	0.438467733221122	7.19151826034209	6.4074762530148e-13	1.09398657755827e-10	557	124	standard ATAC in FFPE kidney
peak_88348	chr5	100468412	100469270	38.9453829237536	3.03428024766989	0.422680199474728	7.17866664073842	7.039455342397e-13	1.18853381839326e-10	525.5	125.5	standard ATAC in FFPE kidney
peak_72393	chr3	65331436	65332581	38.9536353104719	3.03449688555492	0.423421974599458	7.16660227288733	7.68819698246534e-13	1.28733881263969e-10	693	164.5	standard ATAC in FFPE kidney
peak_85638	chr5	32437313	32438601	38.1417101410544	3.07915664843757	0.430148618792983	7.15835530770232	8.16507058099634e-13	1.36156192058743e-10	774	177.5	standard ATAC in FFPE kidney
peak_63514	chr2	52279862	52280803	32.6595189336564	3.778007112923	0.528708496523804	7.14572801035532	8.95201608780171e-13	1.47258847591005e-10	510.5	72.5	standard ATAC in FFPE kidney
peak_40481	chr15	53177216	53178196	36.0028537082803	3.2476113769937	0.45449699998857	7.14550674058438	8.96644910555159e-13	1.47296948522605e-10	567.5	114.5	standard ATAC in FFPE kidney
peak_23468	chr12	25783360	25783967	38.6453760625742	3.02135636407472	0.423272469077014	7.13808854769854	9.46376637751479e-13	1.54423261196806e-10	370.5	93.5	standard ATAC in FFPE kidney
peak_116258	chr9	82868713	82869710	38.645039072446	3.02167816813868	0.423424669418914	7.13628275906899	9.58886589073407e-13	1.56254811413029e-10	603	147	standard ATAC in FFPE kidney
peak_109647	chr8	90722662	90723700	36.5230244032368	3.17877416739859	0.446617500945872	7.11744201843054	1.09948447204099e-12	1.7626163295379e-10	596.5	127.5	standard ATAC in FFPE kidney
peak_48637	chr17	10512003	10513242	33.3802609032524	3.55133136655878	0.499051096729038	7.11616784300344	1.10969149650781e-12	1.77264831907326e-10	668.5	114.5	standard ATAC in FFPE kidney
peak_77173	chr4	11117972	11119035	32.3622628680499	3.76331768161912	0.529069267582005	7.11309069003109	1.13472660925019e-12	1.80080816614738e-10	565.5	82.5	standard ATAC in FFPE kidney
peak_95790	chr6	92040501	92042731	38.3281904477017	3.00852779130849	0.424317485089504	7.09027531748752	1.33845455165686e-12	2.09675114842286e-10	1350	338	standard ATAC in FFPE kidney
peak_113906	chr9	44689076	44690479	33.0744154607992	3.53693582109799	0.499559979462388	7.08010242314514	1.44047956421127e-12	2.24213134114954e-10	754	128.5	standard ATAC in FFPE kidney
peak_49846	chr17	29686336	29686973	36.7122555054569	3.10059995306553	0.438763655740511	7.06667453536593	1.58690547047237e-12	2.44500097100764e-10	373.5	87.5	standard ATAC in FFPE kidney
peak_73127	chr3	86027547	86029057	34.0810733235824	3.35926462416948	0.47560388330035	7.06315642517171	1.62762319889257e-12	2.49508684174246e-10	832	164	standard ATAC in FFPE kidney
peak_25189	chr12	77633965	77634757	35.9003303360394	3.15142714491937	0.447259542387296	7.04608140521337	1.84026619343315e-12	2.79288538749697e-10	453.5	103	standard ATAC in FFPE kidney
peak_72184	chr3	58495700	58496662	34.5878270308032	3.27968658951335	0.465834120044504	7.04046021618173	1.91605913085935e-12	2.88987360029512e-10	537	108	standard ATAC in FFPE kidney
peak_79545	chr4	82151152	82153154	33.2691481541649	3.43000769180892	0.48746236921367	7.03645636757951	1.97190361011382e-12	2.96307157552381e-10	1080.5	198.5	standard ATAC in FFPE kidney
peak_90303	chr5	125342410	125343509	33.2691481541649	3.43000769180892	0.48746236921367	7.03645636757951	1.97190361011382e-12	2.96307157552381e-10	593	104	standard ATAC in FFPE kidney
peak_109715	chr8	91566539	91567846	31.2441552660511	3.85654039801028	0.548795975885363	7.02727528529814	2.10605601512349e-12	3.13921978401292e-10	676.5	91	standard ATAC in FFPE kidney
peak_88347	chr5	100467352	100468332	35.0990713587849	3.20685602580996	0.456539089497836	7.0242748092771	2.15180919737657e-12	3.19392592515123e-10	546	113.5	standard ATAC in FFPE kidney
peak_82085	chr4	129419248	129420244	36.403659267431	3.08706572656097	0.43970425908973	7.02077740377537	2.20637128838821e-12	3.25965160988602e-10	574	132.5	standard ATAC in FFPE kidney
peak_62363	chr2	29921140	29922513	35.6027372803047	3.13794377214882	0.44765109608412	7.00979803154365	2.38662390621621e-12	3.48710995835658e-10	773	169.5	standard ATAC in FFPE kidney
peak_65811	chr2	103637058	103638265	36.4229148364405	3.08760107763757	0.441015983513004	7.00110924108159	2.53943835090234e-12	3.69705728968973e-10	686	166	standard ATAC in FFPE kidney
peak_112355	chr9	3003991	3004254	62.2924048781633	-6.07005335934352	0.867995142787705	-6.99318816445052	2.6870872707975e-12	3.88410317464004e-10	4	560.5	FFPE-ATAC in FFPE kidney
peak_116435	chr9	88376588	88378349	33.4721332342489	3.33069662435157	0.476864817852823	6.98457193665217	2.85725812446523e-12	4.07675735495882e-10	943.5	191	standard ATAC in FFPE kidney
peak_22459	chr11	120209684	120210371	32.1486267467215	3.49261454584455	0.50227094090586	6.95364645134659	3.559630463886e-12	4.9681161620188e-10	362	67	standard ATAC in FFPE kidney
peak_96269	chr6	100236630	100237917	30.7538911813484	4.60884162755516	0.664837286194881	6.93228512187294	4.1409626668274e-12	5.69447947545482e-10	664	53	standard ATAC in FFPE kidney
peak_37075	chr14	73725317	73726201	30.3345343352818	3.81128241499288	0.551341424702285	6.91274452495731	4.75365603661102e-12	6.42073207930592e-10	442	62	standard ATAC in FFPE kidney
peak_87083	chr5	67009205	67010419	35.5084662947821	3.0461955700785	0.441963682192912	6.89241150984182	5.4854415313134e-12	7.24030634432771e-10	675	163	standard ATAC in FFPE kidney
peak_12238	chr10	80119022	80119894	33.3637712807342	3.22310670127091	0.468378715190594	6.88141155167428	5.92623660636564e-12	7.7714889624189e-10	468.5	96.5	standard ATAC in FFPE kidney
peak_69688	chr2	169956359	169957226	32.0485171799252	3.37102674238566	0.490310537752506	6.87528919496169	6.18642273881294e-12	8.08034819285316e-10	452	90.5	standard ATAC in FFPE kidney
peak_72577	chr3	68930350	68931801	33.8839419756907	3.15036164217088	0.459540766590139	6.85545629726615	7.10852517130776e-12	9.12503436034695e-10	770.5	177.5	standard ATAC in FFPE kidney
peak_102137	chr7	88137778	88139008	31.2475951927988	3.44766753229736	0.503516245901669	6.84718231111583	7.53187086702964e-12	9.62780599452777e-10	622.5	118	standard ATAC in FFPE kidney
peak_109417	chr8	86724590	86724853	30.7466800668518	3.54808884474176	0.518607335400523	6.84157088137126	7.83294302392146e-12	9.98117280670848e-10	130.5	22	standard ATAC in FFPE kidney
peak_64560	chr2	72816759	72818162	29.7176788493582	3.7792349314973	0.552482607629604	6.84045955349056	7.89395334859811e-12	1.00378718082529e-09	696	103.5	standard ATAC in FFPE kidney
peak_65597	chr2	98503820	98504272	42.9117473631596	-4.76480017679613	0.697988381762038	-6.82647491175658	8.70265058160154e-12	1.10086265900292e-09	13	647	FFPE-ATAC in FFPE kidney
peak_121265	chrX	160346249	160347312	34.8881860330293	3.01821558781045	0.442381947048624	6.82264637593521	8.93784818926707e-12	1.12943926952189e-09	584.5	139.5	standard ATAC in FFPE kidney
peak_110376	chr8	108159949	108161083	29.923414725015	3.64207097627877	0.534348454653682	6.8159100013478	9.36689248844874e-12	1.17875457398114e-09	558.5	89.5	standard ATAC in FFPE kidney
peak_86819	chr5	64621253	64621841	29.9179131338694	3.64189477377744	0.534789529234965	6.80995901132788	9.76265569921532e-12	1.22589709289539e-09	289	47.5	standard ATAC in FFPE kidney
peak_100066	chr7	31740766	31741449	29.425587384769	3.76369371490031	0.553122007023645	6.80445483475298	1.01432603327142e-11	1.26597053294258e-09	329	49	standard ATAC in FFPE kidney
peak_28991	chr13	35832192	35833709	32.7630835781191	3.19391236965315	0.469829693088795	6.7980215312818	1.06065606885925e-11	1.31838031037634e-09	793.5	168.5	standard ATAC in FFPE kidney
peak_22534	chr11	120685003	120686305	33.2695002952117	3.12105480322868	0.46014472809693	6.78276770905702	1.17895118919651e-11	1.44619598752255e-09	686.5	158.5	standard ATAC in FFPE kidney
peak_117320	chr9	106789166	106790012	34.5823405905762	3.00396245520787	0.443034720368973	6.78042220416964	1.19825187420254e-11	1.46282886532718e-09	457.5	111.5	standard ATAC in FFPE kidney
peak_119887	chrX	70961123	70962518	34.5823405905762	3.00396245520787	0.443034720368973	6.78042220416964	1.19825187420254e-11	1.46282886532718e-09	760	187	standard ATAC in FFPE kidney
peak_83760	chr4	147965055	147966049	33.2664125095107	3.12134038725436	0.460835594850739	6.77321895732758	1.25948112791572e-11	1.52649614988979e-09	523.5	125	standard ATAC in FFPE kidney
peak_86012	chr5	37086601	37087567	34.0927656370485	3.06792120529009	0.453060125855435	6.77155421589456	1.27406198671873e-11	1.5426301927637e-09	513	126	standard ATAC in FFPE kidney
peak_93423	chr6	38203916	38204678	30.919069405507	3.43230668104809	0.507419036006292	6.7642450075632	1.34006146221886e-11	1.60971572720528e-09	385.5	74.5	standard ATAC in FFPE kidney
peak_83026	chr4	138009403	138010818	30.8388893879766	3.30988036859306	0.492967917277578	6.71419021925792	1.89113478073438e-11	2.21477753839301e-09	695.5	140.5	standard ATAC in FFPE kidney
peak_98275	chr6	140571600	140572848	32.1541434887856	3.16385998358359	0.471232544532313	6.71400993054002	1.89347414473392e-11	2.21538297334393e-09	636	146	standard ATAC in FFPE kidney
peak_65721	chr2	102501068	102502119	39.6894815185654	-3.43960343347307	0.513160551437023	-6.70278224590923	2.04488080260918e-11	2.37424918709057e-09	66	1331	FFPE-ATAC in FFPE kidney
peak_100162	chr7	35439933	35440929	29.5205475014665	3.48440367860583	0.52035811154102	6.69616481673919	2.13960399658671e-11	2.47477469306438e-09	477	85.5	standard ATAC in FFPE kidney
peak_90117	chr5	123588241	123588638	32.6495570235871	3.09097676963103	0.462107619840639	6.68886778083635	2.24903812934688e-11	2.58903476473413e-09	206	49	standard ATAC in FFPE kidney
peak_118793	chrUn_random	5495397	5497308	40.4900722446907	-4.6775485525205	0.699593439549486	-6.68609550645969	2.29203474308387e-11	2.62765231223111e-09	51	2585.5	FFPE-ATAC in FFPE kidney
peak_3894	chr1	99557826	99559028	30.0297150141319	3.38493115716613	0.506394920148943	6.68437028588388	2.31919719466872e-11	2.65471645737014e-09	577.5	106.5	standard ATAC in FFPE kidney
peak_111129	chr8	119780133	119781036	30.0187118318408	3.38457412297372	0.507006490697594	6.67560314329874	2.46217423408444e-11	2.79992281190122e-09	440	81	standard ATAC in FFPE kidney
peak_33202	chr13	114408310	114409060	29.718030990405	3.36899457351205	0.507027114238514	6.64460435922017	3.04032630064733e-11	3.40326175333234e-09	363	68.5	standard ATAC in FFPE kidney
peak_9067	chr10	19653444	19654548	31.5400387984348	3.13261510140906	0.47221848150637	6.63382570588103	3.27096045545324e-11	3.63465298726433e-09	555.5	124.5	standard ATAC in FFPE kidney
peak_101378	chr7	75095764	75097399	28.9116074121331	3.45161439016419	0.521870364214106	6.61393063651361	3.74247153046178e-11	4.12092218414e-09	765.5	138.5	standard ATAC in FFPE kidney
peak_76177	chr3	143865143	143865572	28.9143582077058	3.45170599438111	0.522091207467446	6.61130841701894	3.8093789257313e-11	4.18701030495117e-09	198	38.5	standard ATAC in FFPE kidney
peak_58530	chr19	24248386	24249103	32.045781535271	3.06114450334019	0.463549034906652	6.60371238601895	4.00987130714469e-11	4.39149545569133e-09	365.5	86	standard ATAC in FFPE kidney
peak_105583	chr7	148660907	148661565	31.2424457427	3.11723324612336	0.472926333749554	6.59137168659789	4.3578136377652e-11	4.71310726922855e-09	324	73.5	standard ATAC in FFPE kidney
peak_13826	chr10	110446549	110447673	30.7195242521708	3.19424618734676	0.484876828595133	6.5877476484114	4.46548767662471e-11	4.81670402769482e-09	556	125	standard ATAC in FFPE kidney
peak_37742	chr14	99697408	99698670	27.5929285354948	3.66442223407831	0.557736475886575	6.57016779878592	5.02585923239368e-11	5.36403469470329e-09	565.5	87	standard ATAC in FFPE kidney
peak_45281	chr16	30070138	30071190	29.1094278911997	3.33579263440846	0.508732054613756	6.55707184981903	5.48745784297757e-11	5.81077809428333e-09	490.5	96	standard ATAC in FFPE kidney
peak_40209	chr15	39774448	39775953	27.7934998101342	3.52664395980633	0.539580697274808	6.53589718390207	6.32293431597533e-11	6.59211995872406e-09	678.5	115.5	standard ATAC in FFPE kidney
peak_4710	chr1	132994055	132994719	26.3832855926276	4.14369851514695	0.634967011390427	6.52584849419693	6.76176433475608e-11	6.99563506034288e-09	294	31	standard ATAC in FFPE kidney
peak_11143	chr10	66558845	66560166	30.1215873451284	3.16253634351367	0.484654824624243	6.52533758632364	6.78485427110884e-11	7.01038325976005e-09	634	140	standard ATAC in FFPE kidney
peak_80732	chr4	106583614	106584400	27.1890200397246	4.69802825072182	0.72083371648616	6.51749237483403	7.14924540601959e-11	7.32791626085468e-09	364	29.5	standard ATAC in FFPE kidney
peak_20909	chr11	102177926	102178499	26.3664438290627	4.14358739682449	0.636215740404345	6.51286526515525	7.37306414658301e-11	7.53826047027096e-09	256.5	27	standard ATAC in FFPE kidney
peak_18954	chr11	78074739	78075750	29.3124129712837	3.22912893609126	0.496657026699823	6.50172807892827	7.94025336666459e-11	8.06150116152926e-09	476	104.5	standard ATAC in FFPE kidney
peak_45478	chr16	31663453	31664543	29.3124129712837	3.22912893609126	0.496657026699823	6.50172807892827	7.94025336666459e-11	8.06150116152926e-09	511	110	standard ATAC in FFPE kidney
peak_2995	chr1	82287262	82288421	29.309662175711	3.22903777844727	0.496821683873503	6.49938978764346	8.06464579205096e-11	8.16295254841701e-09	548.5	111.5	standard ATAC in FFPE kidney
peak_22304	chr11	118947373	118948017	26.9870762318623	3.62930958139207	0.558863006064121	6.49409522908314	8.35338988298951e-11	8.41318548248332e-09	286.5	46.5	standard ATAC in FFPE kidney
peak_42426	chr15	85500959	85501924	28.5125113763334	5.10134484655004	0.787237063840766	6.48006182745213	9.16850402455385e-11	9.18088981252771e-09	476	31	standard ATAC in FFPE kidney
peak_69463	chr2	167513986	167514943	27.9858186980553	3.40056235212351	0.525683929898203	6.46883451959815	9.87616774322919e-11	9.78473068898055e-09	439	84.5	standard ATAC in FFPE kidney
peak_100067	chr7	31741596	31742917	30.013562381742	3.05274548567515	0.476689962822332	6.40404817336787	1.51310335067966e-10	1.44492455398289e-08	626.5	151.5	standard ATAC in FFPE kidney
peak_111429	chr8	123191650	123192616	27.3851309954402	3.3660803947393	0.525920910859045	6.40035474010932	1.55016367632249e-10	1.47567812958863e-08	427.5	83	standard ATAC in FFPE kidney
peak_27279	chr12	114378183	114378969	27.3937203722868	3.36593403168459	0.526419382591394	6.39401614567301	1.61584355794e-10	1.52981624826649e-08	344.5	66.5	standard ATAC in FFPE kidney
peak_74157	chr3	100489065	100490281	29.2071388034701	3.11261919638274	0.487397127004412	6.38620751729331	1.70050205581114e-10	1.60247931715213e-08	566	129.5	standard ATAC in FFPE kidney
peak_119716	chrX	53708624	53709497	29.2092156187864	3.11352141967767	0.487983997067435	6.38037607460191	1.76653628601548e-10	1.65092247813681e-08	401.5	94.5	standard ATAC in FFPE kidney
peak_65376	chr2	92023136	92024507	27.0820363485599	3.34842587474845	0.526705723713917	6.3572991976202	2.05331817418714e-10	1.88780110257977e-08	597.5	114	standard ATAC in FFPE kidney
peak_112357	chr9	3020894	3021141	70.6810300049231	-9.30133548425341	1.46314267067648	-6.3570939940894	2.05606194287273e-10	1.88780110257977e-08	0.5	602.5	FFPE-ATAC in FFPE kidney
peak_38166	chr14	115441006	115441940	28.9037071664615	3.09619494927464	0.487879422365017	6.34622984151637	2.20655502429667e-10	2.00927082377228e-08	428	98	standard ATAC in FFPE kidney
peak_57919	chr19	10115743	10116210	28.9009563708887	3.09610243010132	0.488053985420853	6.34377040775832	2.24208892978485e-10	2.040099540871e-08	216.5	49.5	standard ATAC in FFPE kidney
peak_32546	chr13	104710306	104711499	25.2603655306582	3.69021434721074	0.583675750458016	6.32237050162697	2.57580866591463e-10	2.31259678480979e-08	491.5	72	standard ATAC in FFPE kidney
peak_99588	chr7	26034298	26036048	25.2545269493845	3.69048330768433	0.583879552033328	6.32062433909944	2.60508619358476e-10	2.33371184994059e-08	729	116.5	standard ATAC in FFPE kidney
peak_8098	chr1	193961449	193962598	26.7816924972523	3.33065062978151	0.527696779368274	6.31167511344063	2.76031228222282e-10	2.46007772929717e-08	492.5	90.5	standard ATAC in FFPE kidney
peak_61626	chr2	18597974	18599155	24.7594504047112	3.84172549670853	0.609577199468248	6.30227885829682	2.93300850221087e-10	2.6063468242892e-08	482.5	60.5	standard ATAC in FFPE kidney
peak_8536	chr10	7675543	7676689	24.5619669157728	4.03427931883863	0.640432225510164	6.2993071837148	2.98978957794203e-10	2.64905816510892e-08	464	54	standard ATAC in FFPE kidney
peak_59061	chr19	32462632	32464169	28.6061141107267	3.07935686274978	0.489202577368002	6.29464562373581	3.08102915941874e-10	2.71998713678707e-08	691	168.5	standard ATAC in FFPE kidney
peak_63662	chr2	58419110	58420202	27.2877722242167	3.23330854020051	0.513808234277381	6.29283130261202	3.11727063919139e-10	2.74998467331395e-08	468.5	97.5	standard ATAC in FFPE kidney
peak_88767	chr5	106129315	106129950	27.2767690419255	3.23292027948147	0.514111357116571	6.2883658077766	3.20825217356648e-10	2.82205475562544e-08	279.5	57.5	standard ATAC in FFPE kidney
peak_31193	chr13	72765766	72766442	25.9694303377066	3.41983538557902	0.54475091200923	6.27779653083183	3.43404899287865e-10	3.00112675607692e-08	281.5	54	standard ATAC in FFPE kidney
peak_121163	chrX	157432212	157433357	27.796939736882	3.14397411547853	0.501298201525293	6.27166446221512	3.57208719108898e-10	3.10170434829221e-08	502	114	standard ATAC in FFPE kidney
peak_80463	chr4	102791735	102792617	27.7855995644627	3.14401146716234	0.501304197308933	6.27166395980686	3.57209871969422e-10	3.10170434829221e-08	395.5	90.5	standard ATAC in FFPE kidney
peak_54407	chr18	33623172	33624159	26.478597850372	3.31255394497752	0.528729489582489	6.26512046376168	3.7253730030891e-10	3.21870109273293e-08	417.5	87.5	standard ATAC in FFPE kidney
peak_92778	chr6	24905958	24906617	27.7804349634453	3.14339632816495	0.502403310701414	6.25671897698364	3.93160933110838e-10	3.38007182975148e-08	297	67	standard ATAC in FFPE kidney
peak_60658	chr19	57684726	57686146	25.1575051682891	3.51958769846898	0.563807989111845	6.24252895744403	4.30552035148209e-10	3.66011381823475e-08	581.5	103	standard ATAC in FFPE kidney
peak_68375	chr2	154233280	154234047	28.2981918529572	3.06111139577389	0.490631188105065	6.23912924817647	4.40013325102212e-10	3.72751079113068e-08	343.5	77	standard ATAC in FFPE kidney
peak_106345	chr8	12756738	12757203	24.445000434493	4.53788072371698	0.727604839398059	6.23673796269844	4.4678945930327e-10	3.77701765165109e-08	194	15.5	standard ATAC in FFPE kidney
peak_55839	chr18	61559906	61560494	25.6580833041079	3.40096748490986	0.545703674841859	6.23226055037184	4.59751963535757e-10	3.8704492863754e-08	244	44.5	standard ATAC in FFPE kidney
peak_61768	chr2	22442767	22445812	32.718952011401	-4.07957467243662	0.656930697850813	-6.21005333710723	5.29666205321831e-10	4.37718168482278e-08	98	3263.5	FFPE-ATAC in FFPE kidney
peak_75901	chr3	137530544	137531027	23.7438661749533	4.21870841423684	0.679996743005227	6.20401267746133	5.50413490058786e-10	4.52403417887128e-08	192.5	20.5	standard ATAC in FFPE kidney
peak_54904	chr18	39648956	39650420	23.8364124862063	3.78325372484893	0.611877123000043	6.18302855694224	6.28833332664395e-10	5.04910800871958e-08	577.5	86	standard ATAC in FFPE kidney
peak_50919	chr17	46167425	46168377	25.8669069654657	3.27546114859681	0.530276645887682	6.1768912019757	6.53760908678448e-10	5.22853888832808e-08	393.5	78	standard ATAC in FFPE kidney
peak_118594	chrM	12839	16242	58.974807932242	-9.04005605868239	1.4647450362882	-6.17176084213994	6.75336013219677e-10	5.37632921486816e-08	0	6908	FFPE-ATAC in FFPE kidney
peak_118593	chrM	52	3426	58.7714858620298	-9.03507878256755	1.46469295411369	-6.16858212992144	6.89050574834999e-10	5.47475451498312e-08	0	6832.5	FFPE-ATAC in FFPE kidney
peak_65447	chr2	92885325	92886508	25.5610615230126	3.25655130103997	0.531154572352635	6.13108023642868	8.7284368045904e-10	6.80540600651536e-08	486	97	standard ATAC in FFPE kidney
peak_20988	chr11	102878030	102878721	27.385483136487	3.00888000490437	0.492378133794507	6.11091313441656	9.90626783402034e-10	7.63146731923225e-08	297	74.5	standard ATAC in FFPE kidney
peak_59999	chr19	46575698	46576326	24.2396318508015	3.46180478437314	0.567072601014503	6.10469414000943	1.02997727928735e-09	7.88464470902316e-08	245	45.5	standard ATAC in FFPE kidney
peak_19499	chr11	85645613	85646555	26.5790595582151	3.07183201086613	0.504925896891534	6.08372838425835	1.17419458854368e-09	8.87133567195297e-08	391.5	90	standard ATAC in FFPE kidney
peak_112361	chr9	3034762	3035278	53.9133706768434	-8.91064748792834	1.46476544387402	-6.08332721473917	1.17713764391074e-09	8.88804723878048e-08	2	962.5	FFPE-ATAC in FFPE kidney
peak_16314	chr11	32354482	32355814	25.7612958075238	3.14124433993095	0.518059714722575	6.06347926824057	1.33207959398153e-09	1.0008215312903e-07	544.5	120.5	standard ATAC in FFPE kidney
peak_87392	chr5	74590937	74591674	23.9420387950668	3.44217989185809	0.568564452340149	6.05415951998134	1.41152683029563e-09	1.05335081398439e-07	284	54.5	standard ATAC in FFPE kidney
peak_52343	chr17	78599152	78600246	24.4429539210138	3.32410875469725	0.54922847286379	6.05232415822265	1.42770807296185e-09	1.06346755013195e-07	427.5	87	standard ATAC in FFPE kidney
peak_12367	chr10	80892833	80894035	23.1301136256493	3.55325198516723	0.590166810138074	6.0207587484222	1.73601346364244e-09	1.26901227116193e-07	446	80	standard ATAC in FFPE kidney
peak_17164	chr11	53163743	53164806	23.6420319338874	3.42168034893912	0.56930891472048	6.01023497167456	1.85254626152648e-09	1.34771354719453e-07	404.5	68.5	standard ATAC in FFPE kidney
peak_112362	chr9	3035692	3036454	48.8694340143475	-6.30815593014262	1.05239041110467	-5.99412144350603	2.04588445317859e-09	1.47951158635457e-07	8.5	1271	FFPE-ATAC in FFPE kidney
peak_86972	chr5	66088973	66090056	24.1316068874151	3.30394099773763	0.551210114889225	5.99397744796757	2.04769782350533e-09	1.47994255776814e-07	427	81	standard ATAC in FFPE kidney
peak_70682	chr3	19210654	19211938	25.9701194688816	3.03436140754368	0.506837342934233	5.98685446099305	2.13938052636254e-09	1.53888552844222e-07	527	131	standard ATAC in FFPE kidney
peak_85268	chr5	23930872	23931226	25.9732072545826	3.03402307794797	0.507317214928606	5.98052458829915	2.224201475108e-09	1.59236058963503e-07	145	36	standard ATAC in FFPE kidney
peak_83223	chr4	140258363	140258913	21.9232214783549	4.09589184705176	0.684966027142934	5.97970072199955	2.23547948455773e-09	1.59855192976927e-07	201.5	19	standard ATAC in FFPE kidney
peak_39118	chr15	10399610	10400763	25.9728702644544	3.0344645767655	0.50748146728599	5.97945890121626	2.2388003612606e-09	1.59998546217686e-07	468	114	standard ATAC in FFPE kidney
peak_64875	chr2	77118488	77119122	25.9756210600272	3.03456888271648	0.508374545154235	5.96915976938975	2.38478499878163e-09	1.69040235330548e-07	255.5	64	standard ATAC in FFPE kidney
peak_21189	chr11	105450509	105451572	25.1578573093359	3.10298267779967	0.52055656942634	5.96089428132508	2.50861231657465e-09	1.76889180772668e-07	423.5	102.5	standard ATAC in FFPE kidney
peak_19788	chr11	88579224	88580387	23.8340138316803	3.28403218980237	0.551183831651577	5.9581431842114	2.5511995016626e-09	1.79475703831083e-07	443.5	93.5	standard ATAC in FFPE kidney
peak_14726	chr10	126497294	126497600	22.8105142053322	3.53187829073496	0.593417645350715	5.95175812247306	2.65277227703365e-09	1.85868362585198e-07	115	21.5	standard ATAC in FFPE kidney
peak_26128	chr12	92827628	92827854	21.8117717391392	3.85259076675743	0.647320650713778	5.95159564662322	2.6554076369109e-09	1.85945837542302e-07	81.5	10.5	standard ATAC in FFPE kidney
peak_9785	chr10	36856470	36857189	22.3040974882397	3.68100626645962	0.618751977248982	5.94908202609008	2.69650490156233e-09	1.88606399225272e-07	269.5	38	standard ATAC in FFPE kidney
peak_98577	chr6	145197967	145199396	23.8453540040996	3.28398896110085	0.552044093554371	5.94878017796854	2.70148153024073e-09	1.88737299277117e-07	542.5	112	standard ATAC in FFPE kidney
peak_393	chr1	17087301	17088318	24.3431813443456	3.17854822860787	0.53500829211059	5.94111955922889	2.83082051453198e-09	1.9619490594559e-07	396.5	85.5	standard ATAC in FFPE kidney
peak_47201	chr16	78376144	78377793	24.3459321399184	3.17865547187075	0.535168922405003	5.9395367309188	2.85828632964004e-09	1.97872847025263e-07	641.5	144.5	standard ATAC in FFPE kidney
peak_118763	chrUn_random	5249057	5249771	30.8057552744224	-3.35600663906214	0.565316589509144	-5.93650832355037	2.91156140910853e-09	2.01446244244092e-07	34.5	695.5	FFPE-ATAC in FFPE kidney
peak_11815	chr10	75495031	75495740	24.351433731064	3.17887170326083	0.536257761828418	5.9278800784574	3.0687046348792e-09	2.11716237363482e-07	270.5	60	standard ATAC in FFPE kidney
peak_18472	chr11	72832110	72832685	23.5281683892272	3.26351359545466	0.552267223785292	5.90930161143048	3.43561157968891e-09	2.33844729044403e-07	216	45	standard ATAC in FFPE kidney
peak_29267	chr13	41315568	41316182	22.0260969916426	3.66020341112384	0.619964755154486	5.90388950451187	3.55029996593728e-09	2.40976362400446e-07	215	36.5	standard ATAC in FFPE kidney
peak_90149	chr5	123794209	123794810	24.0345851063197	3.15820736762364	0.536254750699622	5.88937881390012	3.87649947964623e-09	2.60931773390761e-07	230.5	51	standard ATAC in FFPE kidney
peak_108212	chr8	63702456	63703729	24.5434156288569	3.06324555487594	0.521988200371609	5.86841915716711	4.39969830796623e-09	2.9290521637985e-07	494.5	118.5	standard ATAC in FFPE kidney
peak_120142	chrX	91479469	91480596	24.5434156288569	3.06324555487594	0.521988200371609	5.86841915716711	4.39969830796623e-09	2.9290521637985e-07	437	99.5	standard ATAC in FFPE kidney
peak_91073	chr5	139230574	139231243	23.2309123236206	3.2425477378986	0.553233762776308	5.86108071500631	4.59864364355905e-09	3.0498064150879e-07	247.5	47.5	standard ATAC in FFPE kidney
peak_30320	chr13	55312166	55313744	21.4034029244452	3.61589790350665	0.619194582627867	5.83967948841017	5.23013424458968e-09	3.42193777884445e-07	552	97	standard ATAC in FFPE kidney
peak_105709	chr7	150646756	150647385	21.4089045155908	3.61613383458188	0.619524915714893	5.83694657447164	5.31661342281418e-09	3.47291130645343e-07	218.5	39.5	standard ATAC in FFPE kidney
peak_108644	chr8	72806416	72807149	23.733904264884	3.13838105485929	0.537697063924263	5.83670855844834	5.32421061902275e-09	3.47600612078884e-07	277	61.5	standard ATAC in FFPE kidney
peak_70201	chr2	181193769	181194624	21.9149842425551	3.46849111495195	0.594572878361304	5.83358447918348	5.42491205710582e-09	3.53795069372324e-07	303	58.5	standard ATAC in FFPE kidney
peak_34880	chr14	31943987	31944433	23.7424936417305	3.13823707917021	0.538336311751898	5.82951030919222	5.55902628045502e-09	3.61571680447958e-07	164.5	35.5	standard ATAC in FFPE kidney
peak_16293	chr11	32122164	32122434	21.8984794691184	3.46779171560409	0.59601765579725	5.81827011645398	5.94597615071231e-09	3.82240425587092e-07	97	19	standard ATAC in FFPE kidney
peak_112363	chr9	3036670	3038300	41.5940946078246	-8.53637003999316	1.46767849234288	-5.81623978584468	6.01861146186916e-09	3.86501047940128e-07	5	2350.5	FFPE-ATAC in FFPE kidney
peak_5901	chr1	157091215	157091857	21.1058098687104	3.59382819591524	0.620794398212557	5.78907961518804	7.07731484776721e-09	4.50207588777589e-07	218.5	36	standard ATAC in FFPE kidney
peak_3773	chr1	94727696	94728588	21.6012234035119	3.44553258869799	0.595760149579061	5.78342239092771	7.31959648034492e-09	4.64647220123577e-07	317	55.5	standard ATAC in FFPE kidney
peak_111894	chr8	127472743	127473966	23.9375633252244	3.02224987200596	0.524061805187975	5.76697221985471	8.07083496783677e-09	5.04952641291873e-07	463.5	112	standard ATAC in FFPE kidney
peak_99436	chr7	20333250	20333495	23.9313877538224	3.02296585088405	0.525051624788515	5.7574640438484	8.53869489389456e-09	5.29050920530784e-07	92.5	23	standard ATAC in FFPE kidney
peak_54574	chr18	35989181	35990129	22.0959629580569	3.31586805026887	0.577427915213176	5.74247964621646	9.33000965237346e-09	5.73694129176089e-07	342	70	standard ATAC in FFPE kidney
peak_62170	chr2	27532273	27533004	20.5990410105711	4.61602051900139	0.803924355869383	5.74185927481886	9.36426295504615e-09	5.75218424389707e-07	254	19.5	standard ATAC in FFPE kidney
peak_70105	chr2	179960249	179960888	21.2981287566315	3.42322033067992	0.596520687577306	5.73864478126132	9.5437156056034e-09	5.85354310736414e-07	223	43.5	standard ATAC in FFPE kidney
peak_9103	chr10	19868356	19869527	21.3087949487944	3.42422783567861	0.597419150311059	5.73170082327578	9.94285349677239e-09	6.07078373923475e-07	393.5	75.5	standard ATAC in FFPE kidney
peak_111412	chr8	123060983	123061547	21.5097032135621	3.27137938852201	0.576352211305625	5.67600735167004	1.37874855662808e-08	8.18389597353203e-07	192	38	standard ATAC in FFPE kidney
peak_89432	chr5	115584540	115585241	22.519111871918	3.05313158441813	0.541477610444086	5.63851861190372	1.71519284785299e-08	9.93830807227841e-07	250	60	standard ATAC in FFPE kidney
peak_78277	chr4	46463249	46465481	21.1980191898352	3.24887824607861	0.576739335453162	5.63318304538022	1.76913507838194e-08	1.02070781522744e-06	749	166	standard ATAC in FFPE kidney
peak_85785	chr5	34162670	34163704	19.1754401071659	3.89192141166929	0.693364729277531	5.61309401435024	1.9874054852593e-08	1.13692687251794e-06	326	44	standard ATAC in FFPE kidney
peak_90349	chr5	125659092	125659859	19.370846780788	3.66833400108612	0.6559913894271	5.5920459631182	2.24409391314423e-08	1.26648575885546e-06	244	40.5	standard ATAC in FFPE kidney
peak_25170	chr12	77470092	77471684	20.8921737473821	3.22573281880034	0.577945533768658	5.5813785734549	2.38619618723745e-08	1.33984089286528e-06	536.5	108	standard ATAC in FFPE kidney
peak_60735	chr19	59419560	59420860	20.8976753385276	3.22597627986674	0.578013828267982	5.58114031550659	2.38946772321825e-08	1.34105842246216e-06	435	94.5	standard ATAC in FFPE kidney
peak_69949	chr2	174154937	174156398	18.869931654841	3.86660884860172	0.693332549645554	5.57684598909775	2.44918521390723e-08	1.36825712933557e-06	461	62	standard ATAC in FFPE kidney
peak_95117	chr6	83406000	83407140	19.573831860872	3.4760400977783	0.625737520890619	5.55510894221402	2.77438671717689e-08	1.52954896547343e-06	364	60.5	standard ATAC in FFPE kidney
peak_24787	chr12	72117656	72117859	20.3960559304871	5.03070343209539	0.905837570512685	5.55364846398248	2.7976783594043e-08	1.54099217074139e-06	71.5	4	standard ATAC in FFPE kidney
peak_116941	chr9	100544388	100544915	21.901582405738	3.00888309416216	0.544202191415255	5.52898011369127	3.22097850737224e-08	1.74723351749308e-06	183.5	46	standard ATAC in FFPE kidney
peak_87461	chr5	75440095	75441066	20.6000822827928	3.20283103313462	0.580974934565245	5.51285579218898	3.53057505616385e-08	1.89823452511058e-06	315	68	standard ATAC in FFPE kidney
peak_68202	chr2	152222954	152223228	21.0924080318933	3.08842440714798	0.560921674937721	5.50598157486227	3.67116927560535e-08	1.96340528737215e-06	92.5	20	standard ATAC in FFPE kidney
peak_119091	chrX	11665267	11666034	19.7740661453832	3.3063244134369	0.601807657487788	5.49398860632475	3.92955853410076e-08	2.08326582485576e-06	244.5	48	standard ATAC in FFPE kidney
peak_93712	chr6	47702629	47703447	24.9392575521833	-3.94280229447982	0.719587219628314	-5.47925558838632	4.27119003145407e-08	2.23899501933455e-06	19.5	664.5	FFPE-ATAC in FFPE kidney
peak_14711	chr10	126416524	126416737	18.1522774709461	4.4260143553983	0.812189922893293	5.44948198769981	5.05167389104628e-08	2.5966244604277e-06	66.5	6	standard ATAC in FFPE kidney
peak_61646	chr2	18919362	18920419	20.7838117938674	3.06478069370121	0.562870843405956	5.44490930664678	5.18317875749646e-08	2.66084435167356e-06	351	82.5	standard ATAC in FFPE kidney
peak_20910	chr11	102179160	102179770	17.754574848415	4.05333090788237	0.745566117473983	5.43658142837186	5.43125240770368e-08	2.77413767937013e-06	179	21	standard ATAC in FFPE kidney
peak_101999	chr7	87171866	87172174	19.9770512254673	3.15464790450422	0.581874802235538	5.42152348303139	5.90932323116943e-08	2.98943391291669e-06	98	21.5	standard ATAC in FFPE kidney
peak_54154	chr18	24363428	24364969	20.4862187381326	3.04124215567576	0.563133256068927	5.40057281806762	6.64284396557002e-08	3.32435930183064e-06	494.5	121.5	standard ATAC in FFPE kidney
peak_112356	chr9	3014105	3014347	72.0003980127364	-7.87913907822369	1.46156518585466	-5.39089132286379	7.01090664602314e-08	3.48578264015197e-06	1	599.5	FFPE-ATAC in FFPE kidney
peak_97377	chr6	124705778	124707087	17.6437990894557	3.76309988386401	0.699178451673679	5.38217371381509	7.35916925614154e-08	3.64403279614497e-06	387.5	53	standard ATAC in FFPE kidney
peak_63502	chr2	51928033	51929039	19.6742935687151	3.12951035294132	0.582561959270014	5.37197855634582	7.78773718129657e-08	3.83748878276099e-06	317.5	71	standard ATAC in FFPE kidney
peak_22529	chr11	120645307	120645985	17.8495349651125	3.54121327579097	0.661054810824849	5.35691325106964	8.46557399303704e-08	4.13462851301548e-06	198.5	30.5	standard ATAC in FFPE kidney
peak_44008	chr16	8738581	8739568	18.3587024777779	3.37488007141796	0.630139910892279	5.35576308226394	8.51960836483902e-08	4.15934807736261e-06	296.5	58	standard ATAC in FFPE kidney
peak_119490	chrX	39503530	39503878	17.8467841695397	3.5410768026864	0.661532983429935	5.3528348417739	8.65868739258545e-08	4.22385503287423e-06	102.5	16.5	standard ATAC in FFPE kidney
peak_56606	chr18	74601837	74602584	17.1428839635087	3.99975759995954	0.747834087332627	5.34845585098409	8.87078083417249e-08	4.31088602235113e-06	212.5	28.5	standard ATAC in FFPE kidney
peak_39569	chr15	27953969	27954521	20.1831240912523	3.0170589482862	0.564385652852889	5.34573997945447	9.00484019871295e-08	4.36817395816577e-06	175	44.5	standard ATAC in FFPE kidney
peak_48878	chr17	13743492	13746068	31.7074816886473	-5.67409567925875	1.06219200471468	-5.34187383643777	9.19906724024943e-08	4.45528051790311e-06	33	2767	FFPE-ATAC in FFPE kidney
peak_20590	chr11	98902340	98902700	18.867533000315	3.23136291025054	0.605260931480925	5.33879314223072	9.35673252711835e-08	4.51451666544753e-06	108.5	22	standard ATAC in FFPE kidney
peak_80557	chr4	104782175	104782772	20.182787101124	3.01759464785247	0.565955554502018	5.33185799458694	9.72129477570358e-08	4.67098607950051e-06	189	51.5	standard ATAC in FFPE kidney
peak_33859	chr14	15177899	15179070	18.0583586264703	3.34861127349632	0.631584216457745	5.30192361721305	1.14588787600434e-07	5.40755876392049e-06	341	69	standard ATAC in FFPE kidney
peak_102059	chr7	87546628	87547980	18.0501062397519	3.34820140808777	0.631990232075591	5.29786891973244	1.17162021962349e-07	5.52042016970193e-06	398.5	82.5	standard ATAC in FFPE kidney
peak_93711	chr6	47698257	47699028	25.2238160630663	-7.81498546431956	1.47690247233422	-5.29147022955965	1.21336943979956e-07	5.67970899421614e-06	1.5	678	FFPE-ATAC in FFPE kidney
peak_119148	chrX	12649481	12650002	18.5702769347084	3.20514015853419	0.607461998159821	5.27628093319993	1.31831937971376e-07	6.12615355793285e-06	151.5	33.5	standard ATAC in FFPE kidney
peak_93708	chr6	47689622	47690406	23.2214826397454	-3.54971243157788	0.673245187818201	-5.27254036984876	1.34548228597159e-07	6.23569228409646e-06	24	587	FFPE-ATAC in FFPE kidney
peak_71450	chr3	38784306	38784962	17.7525131840172	3.32157680272682	0.632745563090459	5.24946676275936	1.52540118076174e-07	6.97644353416554e-06	189.5	35.5	standard ATAC in FFPE kidney
peak_112354	chr9	3003308	3003653	62.4998408553798	-7.67406265609027	1.46199588046333	-5.24903165504012	1.5290080286548e-07	6.98768165396213e-06	1	742	FFPE-ATAC in FFPE kidney
peak_48300	chr17	4995363	4996087	17.7552639795899	3.32171550961807	0.633117599229288	5.2466011269655	1.5493082328005e-07	7.06982379925526e-06	208	43	standard ATAC in FFPE kidney
peak_48860	chr17	13498733	13499248	23.0226114666656	-4.16233250216526	0.793705698793323	-5.24417615810657	1.56982163568565e-07	7.15269105399142e-06	12	389	FFPE-ATAC in FFPE kidney
peak_82269	chr4	131604651	131605453	16.742767535533	3.68126804444069	0.702078006437155	5.24338892642724	1.57653731249953e-07	7.1752220837399e-06	219.5	33	standard ATAC in FFPE kidney
peak_54976	chr18	42717415	42718547	24.0254981416999	-7.74455266292151	1.47867572535286	-5.23749225752213	1.62773126633768e-07	7.397141071442e-06	0	943	FFPE-ATAC in FFPE kidney
peak_70704	chr3	19766526	19767209	23.8314394285907	-7.73272375873616	1.47967247705045	-5.22596985391686	1.73244586434569e-07	7.79433934320204e-06	1	563	FFPE-ATAC in FFPE kidney
peak_93718	chr6	47721775	47722523	22.8179262850219	-3.52223628389577	0.674226414151299	-5.22411494116481	1.74990061232014e-07	7.86123126519162e-06	24	547.5	FFPE-ATAC in FFPE kidney
peak_93717	chr6	47717587	47718100	23.6126784298735	-7.71970355449218	1.47858632290376	-5.2210029505289	1.77956705487468e-07	7.97970709267094e-06	0	421	FFPE-ATAC in FFPE kidney
peak_52679	chr17	83614089	83615296	16.3392111808096	4.26623451487286	0.817516255539733	5.21853172455421	1.80347091174533e-07	8.0720595697868e-06	327	37	standard ATAC in FFPE kidney
peak_26214	chr12	98299504	98300143	29.0797337043933	-5.54675691614946	1.06444049750088	-5.21096005758168	1.87865899598464e-07	8.37160198635914e-06	4	630.5	FFPE-ATAC in FFPE kidney
peak_93703	chr6	47626435	47627025	23.20912207515	-7.69483193340053	1.4790128687075	-5.20268085302394	1.96434042805997e-07	8.70554428715577e-06	0	476	FFPE-ATAC in FFPE kidney
peak_42567	chr15	88564258	88565017	16.9402510244715	3.45896475771409	0.664954990984459	5.20180283569739	1.97364546705145e-07	8.73086745111507e-06	208.5	40.5	standard ATAC in FFPE kidney
peak_59525	chr19	40582817	40583494	23.227648789356	-7.69566390977757	1.4805719800629	-5.19776411644006	2.01699845043132e-07	8.9161599864812e-06	1.5	542	FFPE-ATAC in FFPE kidney
peak_14050	chr10	116017919	116019200	17.9499966729556	3.15173100256111	0.60897119518386	5.17550095552474	2.27300267397167e-07	9.92511842883235e-06	367	84.5	standard ATAC in FFPE kidney
peak_93701	chr6	47617769	47618349	22.6053314359153	-7.65677136943475	1.47972760325563	-5.17444653501677	2.28587552078735e-07	9.97416266363939e-06	0	457	FFPE-ATAC in FFPE kidney
peak_93704	chr6	47630753	47631339	22.6084192216163	-7.65691143872049	1.47988665253032	-5.17398506542962	2.291531486272e-07	9.9952541656681e-06	0	463.5	FFPE-ATAC in FFPE kidney
peak_89719	chr5	119009679	119011080	16.0361165339292	4.23774308668235	0.819068197674371	5.17385865879645	2.29308313688633e-07	9.99843466472203e-06	375.5	36.5	standard ATAC in FFPE kidney
peak_51247	chr17	50080213	50080896	22.4174482942081	-7.64447722026502	1.48112760747134	-5.16125496662378	2.45299815138373e-07	1.06081916497621e-05	1	530	FFPE-ATAC in FFPE kidney
peak_48593	chr17	9223562	9224224	22.2110384382949	-7.63121011965799	1.48084226165226	-5.15329033839393	2.5595521211791e-07	1.10180380332513e-05	0	513	FFPE-ATAC in FFPE kidney
peak_9789	chr10	36860711	36861287	18.4619149811937	3.02667991206834	0.587683411557756	5.15018775848309	2.60225818522184e-07	1.11623470017046e-05	167.5	39.5	standard ATAC in FFPE kidney
peak_91094	chr5	139470683	139471646	16.6371563775911	3.43047192725697	0.666552960808285	5.14658568630025	2.65270322648619e-07	1.13347351502484e-05	261.5	51	standard ATAC in FFPE kidney
peak_93700	chr6	47613455	47614169	21.7920431550664	-7.60402500465708	1.48047570071518	-5.13620385730326	2.80343553670713e-07	1.18951775771122e-05	0	544.5	FFPE-ATAC in FFPE kidney
peak_93702	chr6	47622092	47622831	21.8013065121694	-7.60445757402559	1.48080452770444	-5.13535543128983	2.81611287973954e-07	1.19406329303334e-05	0	561	FFPE-ATAC in FFPE kidney
peak_113288	chr9	32162056	32164066	21.8074820835714	-7.60474957547212	1.48132131096927	-5.13376100050578	2.84008711555631e-07	1.20213213828512e-05	5	1521	FFPE-ATAC in FFPE kidney
peak_99527	chr7	25266580	25267227	17.6524036172208	3.12460349489574	0.61114657340083	5.1126908517352	3.17601839514259e-07	1.32540164842813e-05	179.5	38.5	standard ATAC in FFPE kidney
peak_14993	chr11	3025604	3025812	22.7133412483832	-4.57695207976411	0.895654794201978	-5.11017426512203	3.21861791549628e-07	1.34087754722203e-05	4	158.5	FFPE-ATAC in FFPE kidney
peak_106662	chr8	19968040	19969345	23.226295099716	-3.09295350195567	0.606048988757619	-5.10347110436753	3.33479451631564e-07	1.38500499002868e-05	57.5	946	FFPE-ATAC in FFPE kidney
peak_53157	chr17	88464158	88464508	16.1362261007256	4.68086197754586	0.917862194546535	5.09974373643139	3.40113643712965e-07	1.41014921501783e-05	96	9	standard ATAC in FFPE kidney
peak_12965	chr10	91850683	91851306	20.9972815884235	-7.55017465363646	1.48199997763493	-5.09458486341243	3.4950625273079e-07	1.44578789584263e-05	1	451.5	FFPE-ATAC in FFPE kidney
peak_54745	chr18	38371397	38371835	16.8346398665296	3.23790508340913	0.637645169001621	5.07791047563147	3.8160841846199e-07	1.5630001948084e-05	117.5	25	standard ATAC in FFPE kidney
peak_31307	chr13	74665900	74669102	22.3259223751311	-3.2436023884053	0.639697518271007	-5.07052520255543	3.96719373789098e-07	1.6188920428096e-05	120	2233	FFPE-ATAC in FFPE kidney
peak_106615	chr8	19719015	19720065	21.2043899973031	-4.03594080349051	0.796438737957584	-5.06748430373994	4.03107731723287e-07	1.64385737333813e-05	21	728.5	FFPE-ATAC in FFPE kidney
peak_47941	chr16	94792237	94792540	16.8267244699394	3.23685446875536	0.639957663995896	5.05791968885011	4.23854856622587e-07	1.71980947231202e-05	84	18.5	standard ATAC in FFPE kidney
peak_109952	chr8	96535853	96536818	16.5291314142047	3.20807526981137	0.63886819940562	5.02149781879275	5.12700862217267e-07	2.04414455934995e-05	255.5	51.5	standard ATAC in FFPE kidney
peak_20538	chr11	98602929	98603704	17.035211141169	3.06759626736837	0.613448275497733	5.0005785163866	5.71585446139382e-07	2.25232457615844e-05	209.5	51	standard ATAC in FFPE kidney
peak_86738	chr5	60433913	60434451	19.1766463136165	-7.41939493519032	1.48391162357502	-4.99989003207321	5.73630216593798e-07	2.25748434913732e-05	0	359	FFPE-ATAC in FFPE kidney
peak_54187	chr18	24835435	24836146	19.1828218850185	-7.41972083841042	1.48447588528156	-4.9982090729639	5.78652267234567e-07	2.27133626781088e-05	2	470	FFPE-ATAC in FFPE kidney
peak_112325	chr8_random	727458	728620	18.9733242434043	-7.4040502394169	1.48408377214776	-4.98897055433858	6.07018976915426e-07	2.37424887096998e-05	1	766.5	FFPE-ATAC in FFPE kidney
peak_25368	chr12	80360206	80360725	18.9794998148063	-7.40437799135961	1.48458161070214	-4.98751832703739	6.11598195878969e-07	2.38908493199971e-05	1.5	343.5	FFPE-ATAC in FFPE kidney
peak_93710	chr6	47693907	47694670	25.0314820242266	-5.3252719675825	1.06845467436518	-4.98408785636741	6.2254789679863e-07	2.42639988863189e-05	7	648	FFPE-ATAC in FFPE kidney
peak_118812	chrUn_random	5813095	5813499	20.4007020636854	-3.97704056522714	0.798783233703888	-4.97887336316005	6.39554701794868e-07	2.48104486082198e-05	9	268.5	FFPE-ATAC in FFPE kidney
peak_91317	chr5	141717032	141717788	15.2135403232674	3.532031703136	0.70946175447231	4.97846667684445	6.40899748410831e-07	2.48509603244168e-05	188.5	32.5	standard ATAC in FFPE kidney
peak_99264	chr7	17401420	17402288	15.7223708458045	3.34114147447226	0.671126037477998	4.97841133839454	6.41082981617675e-07	2.48509603244168e-05	221	44.5	standard ATAC in FFPE kidney
peak_32514	chr13	104123940	104124908	15.2107895276946	3.531874413705	0.710052251915071	4.97410493971287	6.55497948248077e-07	2.5320925510273e-05	241.5	44.5	standard ATAC in FFPE kidney
peak_88273	chr5	99186114	99186645	18.5790312457838	-7.37353223104497	1.4855264401832	-4.96358195424353	6.92048192143849e-07	2.66228311486629e-05	1	337.5	FFPE-ATAC in FFPE kidney
peak_118580	chr9_random	241910	243681	18.3664458184686	-7.35718133504928	1.48483782912652	-4.95487196697923	7.23779318066866e-07	2.76336397680529e-05	7	1128	FFPE-ATAC in FFPE kidney
peak_8425	chr10	5958374	5958748	14.9097565452121	4.56326337721442	0.923218224858719	4.94277869992519	7.70168909440882e-07	2.9157525165765e-05	96	7.5	standard ATAC in FFPE kidney
peak_107168	chr8	33119695	33120472	16.7348672898615	3.03866915152654	0.614916951730984	4.94159275162723	7.74869383701203e-07	2.93172181015416e-05	203.5	49.5	standard ATAC in FFPE kidney
peak_118706	chrUn_random	4528241	4528493	17.9598016780441	-7.32495473753931	1.48531899941931	-4.93157008050327	8.15712921684388e-07	3.06873374551479e-05	0	157.5	FFPE-ATAC in FFPE kidney
peak_118667	chrUn_random	3919754	3919969	17.7533918221309	-7.30839654455926	1.48561761467283	-4.91943315182673	8.67952041863745e-07	3.24111970346682e-05	0	134.5	FFPE-ATAC in FFPE kidney
peak_100724	chr7	53121136	53122038	15.4196131890524	3.30954790388083	0.672750124417215	4.91943112867916	8.67961012596941e-07	3.24111970346682e-05	221.5	47.5	standard ATAC in FFPE kidney
peak_90902	chr5	137042901	137043672	14.9128594818316	3.50123956233777	0.712460681494613	4.91429162798542	8.91040350144642e-07	3.31046543780511e-05	186	33	standard ATAC in FFPE kidney
peak_89520	chr5	116181372	116181650	14.9217858488064	3.50035511216695	0.713245312376304	4.90764545020968	9.2176292357756e-07	3.40483707206875e-05	66	12	standard ATAC in FFPE kidney
peak_98286	chr6	140640958	140641535	17.5655086804237	-7.29268920650735	1.48651934842004	-4.90588246581417	9.30082105940067e-07	3.43452312048901e-05	0	353.5	FFPE-ATAC in FFPE kidney
peak_15847	chr11	20836431	20836875	17.3652743959124	-7.27610563005185	1.48702635413986	-4.89305761783931	9.92813250470666e-07	3.64073453937303e-05	1	269.5	FFPE-ATAC in FFPE kidney
peak_118705	chrUn_random	4527730	4528030	17.1526889685972	-7.25861541022858	1.48658052836537	-4.88275964317256	1.04611356355124e-06	3.80838187074034e-05	0	180	FFPE-ATAC in FFPE kidney
peak_36167	chr14	58143880	58145057	16.4345234385539	3.00915141805844	0.61739190641857	4.87397289594259	1.09376002687223e-06	3.96309519841121e-05	300.5	75.5	standard ATAC in FFPE kidney
peak_112318	chr8_random	681527	681915	16.955542469787	-7.24181116975032	1.48712520138802	-4.86967147284647	1.11783943291997e-06	4.04552047703134e-05	1	227	FFPE-ATAC in FFPE kidney
peak_55738	chr18	60907948	60908500	13.9034508234757	4.02010650105043	0.829721762319349	4.84512602129766	1.26531338817851e-06	4.50282660188914e-05	126	17	standard ATAC in FFPE kidney
peak_93716	chr6	47714167	47714408	16.5519861150635	-7.20705320339112	1.48783957082494	-4.84397198778302	1.27268883239613e-06	4.52774788473525e-05	0	138.5	FFPE-ATAC in FFPE kidney
peak_32110	chr13	99265001	99266070	16.5581616864655	-7.20742261663848	1.48846032955512	-4.84220000595694	1.28409415056426e-06	4.56565139863101e-05	1	612	FFPE-ATAC in FFPE kidney
peak_46524	chr16	50430178	50430392	15.1251079190186	3.2777162047175	0.677671301532298	4.83673456040736	1.31989497649715e-06	4.67789250504079e-05	51	10	standard ATAC in FFPE kidney
peak_26928	chr12	111094904	111095543	16.3517518305523	-7.18944789458297	1.48833524674836	-4.83052988921018	1.36170170366367e-06	4.80644326086442e-05	0	362.5	FFPE-ATAC in FFPE kidney
peak_93714	chr6	47708624	47708838	16.3548396162533	-7.18963456840506	1.48865177582431	-4.82962818112648	1.36788235571146e-06	4.82545707166882e-05	0	121	FFPE-ATAC in FFPE kidney
peak_60149	chr19	47900857	47901422	16.3579274019543	-7.1898230014127	1.48906759998312	-4.82840604516156	1.37630242092787e-06	4.8495312318167e-05	0	320.5	FFPE-ATAC in FFPE kidney
peak_8655	chr10	10054980	10055501	16.1546053317421	-7.17181476666253	1.48924684674766	-4.81573271907538	1.46660725846179e-06	5.13350546408433e-05	1	292.5	FFPE-ATAC in FFPE kidney
peak_73815	chr3	95848344	95849047	15.9451076901279	-7.15319928405604	1.48889920225035	-4.80435429963597	1.55251705482487e-06	5.41394673702611e-05	0.5	386.5	FFPE-ATAC in FFPE kidney
peak_106640	chr8	19860667	19860875	15.9481954758289	-7.15338878914569	1.48912655607565	-4.80374804945879	1.55722759767002e-06	5.42881605056375e-05	0	115.5	FFPE-ATAC in FFPE kidney
peak_119984	chrX	73843825	73844583	18.7830518689624	-3.84955397432691	0.802258836401989	-4.79839398415552	1.59942928609418e-06	5.56955089472222e-05	16	461	FFPE-ATAC in FFPE kidney
peak_109885	chr8	94881450	94881867	14.8106730997189	3.2454114879379	0.676505512797587	4.79731713421964	1.60804899521118e-06	5.59321474484693e-05	98.5	19.5	standard ATAC in FFPE kidney
peak_85540	chr5	31215670	31215986	14.8020837228724	3.24559338985326	0.677413304003677	4.79115684718769	1.65822431050667e-06	5.74630501945362e-05	76.5	15.5	standard ATAC in FFPE kidney
peak_81087	chr4	114581076	114582117	14.8161746908645	3.24573322554091	0.677494352941536	4.79079008031377	1.6612585994439e-06	5.75517926425756e-05	244.5	56.5	standard ATAC in FFPE kidney
peak_118826	chrUn_random	5890136	5890628	15.7479611913176	-7.13511188141698	1.48969819277876	-4.78963585778924	1.67084242900461e-06	5.78508370947069e-05	0	269	FFPE-ATAC in FFPE kidney
peak_32957	chr13	111399501	111399988	15.7510489770186	-7.13530585401323	1.49008799283946	-4.78851308667783	1.68021608352095e-06	5.8142268140376e-05	0	265	FFPE-ATAC in FFPE kidney
peak_80801	chr4	107106820	107107368	15.3112512355377	3.08520205330498	0.645843744463458	4.77701004268152	1.77920891202015e-06	6.11839968327233e-05	132.5	28	standard ATAC in FFPE kidney
peak_106614	chr8	19709757	19709998	15.5322879783014	-7.11563326814934	1.48966256857997	-4.77667454243168	1.78217865552118e-06	6.12521249872143e-05	0	131	FFPE-ATAC in FFPE kidney
peak_11632	chr10	71759797	71760211	15.5446391211054	-7.11640531842806	1.48997437215375	-4.77619310199365	1.78644853939366e-06	6.13295199782126e-05	0	224	FFPE-ATAC in FFPE kidney
peak_106623	chr8	19757917	19758222	15.5446391211054	-7.11640531842806	1.48997437215375	-4.77619310199365	1.78644853939366e-06	6.13295199782126e-05	0	165	FFPE-ATAC in FFPE kidney
peak_935	chr1	36614907	36615236	14.8127499150353	3.24694178386182	0.68049670544994	4.77142910150456	1.82923370082281e-06	6.26567950427793e-05	75.5	17.5	standard ATAC in FFPE kidney
peak_93705	chr6	47635038	47636489	15.3351414794912	-7.09706312766065	1.49002068093271	-4.76306350541261	1.90675800516903e-06	6.4982654931418e-05	0	781	FFPE-ATAC in FFPE kidney
peak_31377	chr13	77578026	77578455	15.3474926222952	-7.09784911225919	1.49099119077834	-4.76049030749398	1.9312320945921e-06	6.56878283007818e-05	0	227.5	FFPE-ATAC in FFPE kidney
peak_118764	chrUn_random	5250678	5250913	14.9254095533658	-7.05818943236331	1.49112791205579	-4.73345671776228	2.20728049201644e-06	7.40209229604102e-05	0	123.5	FFPE-ATAC in FFPE kidney
peak_8434	chr10	6104524	6105271	14.9439362675717	-7.05939403923718	1.49196506254491	-4.73160814315293	2.22748095471312e-06	7.4472358299985e-05	0	389.5	FFPE-ATAC in FFPE kidney
peak_81706	chr4	123341262	123342280	13.4919942230807	3.62958127309006	0.767446103057802	4.72942824079555	2.25153016936962e-06	7.52143483125167e-05	221	32.5	standard ATAC in FFPE kidney
peak_109624	chr8	89996289	89997038	13.4892434275079	3.62940777375149	0.767419638144829	4.72936525643946	2.25222872078584e-06	7.52170143443983e-05	166	27	standard ATAC in FFPE kidney
peak_3120	chr1	84835248	84835541	14.0066633268916	3.40145419571792	0.719294853762716	4.72887325402721	2.25769262338468e-06	7.53373994150797e-05	63.5	13	standard ATAC in FFPE kidney
peak_106643	chr8	19881164	19881427	18.1765104341549	-3.79931167978169	0.80357013397978	-4.72803992971358	2.26697610427328e-06	7.56174015324772e-05	5	155.5	FFPE-ATAC in FFPE kidney
peak_13309	chr10	95540083	95540654	18.4826928667363	-3.4777006560409	0.736085021373864	-4.72459098481579	2.30578964749811e-06	7.68579689356898e-05	15.5	335	FFPE-ATAC in FFPE kidney
peak_112307	chr8_random	393587	393892	14.7344386259575	-7.03926340940843	1.491613536485	-4.71922735831192	2.36742107662339e-06	7.86320152346027e-05	0	155.5	FFPE-ATAC in FFPE kidney
peak_118649	chrUn_random	3632174	3632596	14.7375264116585	-7.03946684062435	1.49187191618465	-4.71854638743201	2.37535809132382e-06	7.88740865921029e-05	1	216	FFPE-ATAC in FFPE kidney
peak_62061	chr2	26431554	26431804	15.0164089753757	3.0533392984767	0.648326748539687	4.70956860156417	2.48241651861212e-06	8.2182048384685e-05	58	14	standard ATAC in FFPE kidney
peak_106641	chr8	19873748	19874036	14.5249409843433	-7.01885592870523	1.49199331383354	-4.7043481117693	2.54678383345368e-06	8.40155305101664e-05	0	148.5	FFPE-ATAC in FFPE kidney
peak_57955	chr19	10379099	10379720	14.5185816351297	3.21298789416786	0.683655649500644	4.69971673095175	2.60522605976455e-06	8.57340824930205e-05	137.5	30.5	standard ATAC in FFPE kidney
peak_106655	chr8	19926544	19927047	14.3308822712341	-6.9991936531434	1.49267075225611	-4.68904052857231	2.74489025572361e-06	9.00620348304412e-05	1	251.5	FFPE-ATAC in FFPE kidney
peak_49776	chr17	29242775	29243000	14.340145628337	-6.99982547227828	1.49385744384965	-4.68573858978124	2.78952122966683e-06	9.11818657604783e-05	0	111	FFPE-ATAC in FFPE kidney
peak_93719	chr6	47722851	47723143	14.1244724153208	-6.97841836777223	1.49305507378375	-4.673918926572	2.95506022373314e-06	9.61453528896016e-05	0	145	FFPE-ATAC in FFPE kidney
peak_106624	chr8	19759679	19760325	14.1275602010218	-6.97862834503197	1.49314311121307	-4.67378397464013	2.95700362351816e-06	9.61453528896016e-05	1	318	FFPE-ATAC in FFPE kidney
peak_118824	chrUn_random	5888555	5888982	14.1275602010218	-6.97862834503197	1.49314311121307	-4.67378397464013	2.95700362351816e-06	9.61453528896016e-05	0	210.5	FFPE-ATAC in FFPE kidney
peak_24598	chr12	68160076	68160962	14.1306479867228	-6.97883912668646	1.49335689503846	-4.67325603803952	2.96461805819467e-06	9.63354262567167e-05	0	439.5	FFPE-ATAC in FFPE kidney
peak_115768	chr9	71958876	71960139	14.20414681583	3.17914694113309	0.681809265115116	4.66280982643486	3.11920974958714e-06	0.000100793092503671	286	71	standard ATAC in FFPE kidney
peak_106608	chr8	19695936	19696210	13.9273259165106	-6.95797922317081	1.49382323171251	-4.65783305243836	3.1955518466406e-06	0.000103040865964196	0	132	FFPE-ATAC in FFPE kidney
peak_118811	chrUn_random	5810806	5811356	13.7240038462984	-6.93681382904593	1.49434419486887	-4.64204555608065	3.44976773161487e-06	0.000110243839255003	0	261.5	FFPE-ATAC in FFPE kidney
peak_84123	chr4	150482408	150482991	12.6773182580904	3.87871732287578	0.838404444489146	4.62630815994677	3.72241331253628e-06	0.000117841523938844	123.5	19	standard ATAC in FFPE kidney
peak_112319	chr8_random	682521	683328	13.5206817760862	-6.9153337524765	1.49492408753231	-4.6258761967584	3.73018074786338e-06	0.000117995236126272	1	379.5	FFPE-ATAC in FFPE kidney
peak_118640	chrUn_random	3558821	3559211	13.5206817760862	-6.9153337524765	1.49492408753231	-4.6258761967584	3.73018074786338e-06	0.000117995236126272	0	183	FFPE-ATAC in FFPE kidney
peak_24380	chr12	55810624	55811827	13.5237695617872	-6.91555280927851	1.49508554365439	-4.625523160618	3.73654047647928e-06	0.000118134930164559	4	570	FFPE-ATAC in FFPE kidney
peak_84548	chr4_random	142938	143426	13.5237695617872	-6.91555280927851	1.49508554365439	-4.625523160618	3.73654047647928e-06	0.000118134930164559	0	232	FFPE-ATAC in FFPE kidney
peak_24383	chr12	55829982	55831267	13.3204474915749	-6.89375121210091	1.49566297725538	-4.6091608316409	4.04297496414698e-06	0.000126670156840609	1	594	FFPE-ATAC in FFPE kidney
peak_25024	chr12	75904758	75905614	13.3204474915749	-6.89375121210091	1.49566297725538	-4.6091608316409	4.04297496414698e-06	0.000126670156840609	0	397.5	FFPE-ATAC in FFPE kidney
peak_112328	chr8_random	735905	736133	13.3204474915749	-6.89375121210091	1.49566297725538	-4.6091608316409	4.04297496414698e-06	0.000126670156840609	0	106	FFPE-ATAC in FFPE kidney
peak_41056	chr15	64870603	64871279	13.3266230629769	-6.89419832845429	1.49627588095581	-4.607571649187	4.07398842514606e-06	0.000127477562140143	0	313	FFPE-ATAC in FFPE kidney
peak_113280	chr9	32094357	32094914	13.3266230629769	-6.89419832845429	1.49627588095581	-4.607571649187	4.07398842514606e-06	0.000127477562140143	1	254.5	FFPE-ATAC in FFPE kidney
peak_106657	chr8	19929737	19930142	18.1723965271507	-3.16144207109996	0.686671309513726	-4.60401072143057	4.14431113440071e-06	0.000129345067713039	14	231	FFPE-ATAC in FFPE kidney
peak_111360	chr8	122752023	122752476	12.88580492932	3.55762872990671	0.772842793284963	4.60330194034032	4.15844657643491e-06	0.000129707003762696	93.5	18	standard ATAC in FFPE kidney
peak_106671	chr8	20008188	20008487	17.1657386643676	-3.71022840013074	0.80654202318968	-4.60016749711029	4.22151358657239e-06	0.000131450839558936	6	166.5	FFPE-ATAC in FFPE kidney
peak_106668	chr8	20000935	20001285	13.1171254213627	-6.87161553295022	1.49630561362913	-4.59238772504759	4.38203270606645e-06	0.000135835489137994	0	160.5	FFPE-ATAC in FFPE kidney
peak_24382	chr12	55819661	55820971	13.1140376356617	-6.87139061704194	1.49628026646226	-4.59231520394797	4.38355618347826e-06	0.000135835489137994	2.5	607	FFPE-ATAC in FFPE kidney
peak_119965	chrX	72994888	72995291	13.1140376356617	-6.87139061704194	1.49628026646226	-4.59231520394797	4.38355618347826e-06	0.000135835489137994	0	186	FFPE-ATAC in FFPE kidney
peak_56759	chr18	75979672	75980027	13.8872981910858	3.14361739706106	0.684595390479029	4.59193479941691	4.39155579734477e-06	0.000135944764183453	80	18	standard ATAC in FFPE kidney
peak_106607	chr8	19691929	19692147	13.1078620642597	-6.87093927614498	1.49666242365587	-4.59084103906443	4.41463473282584e-06	0.000136554874468509	0	101.5	FFPE-ATAC in FFPE kidney
peak_121469	chrX	166527063	166527611	13.1263887784657	-6.87229657875348	1.49725087681744	-4.5899432654608	4.43366503327514e-06	0.000137108638032322	1	248	FFPE-ATAC in FFPE kidney
peak_118704	chrUn_random	4523844	4525305	12.9199789225525	-6.84959311797064	1.49736659343585	-4.57442629480174	4.77526673120126e-06	0.000146517043137746	4	656.5	FFPE-ATAC in FFPE kidney
peak_118728	chrUn_random	4766866	4767087	12.9076277797485	-6.84867794993077	1.49726524674675	-4.57412470155942	4.78214966554866e-06	0.000146691204123835	0	102	FFPE-ATAC in FFPE kidney
peak_101064	chr7	67027909	67028119	12.7135690666393	-6.82653108355589	1.49783428623273	-4.55760102856611	5.17412041070352e-06	0.000157462558130009	0	93	FFPE-ATAC in FFPE kidney
peak_106610	chr8	19700164	19700668	12.7135690666393	-6.82653108355589	1.49783428623273	-4.55760102856611	5.17412041070352e-06	0.000157462558130009	1	221.5	FFPE-ATAC in FFPE kidney
peak_106631	chr8	19790462	19790706	12.7104812809383	-6.82629928523449	1.49780906604357	-4.55752301143832	5.17604210364512e-06	0.000157462558130009	0	108.5	FFPE-ATAC in FFPE kidney
peak_118707	chrUn_random	4531404	4532093	12.7104812809383	-6.82629928523449	1.49780906604357	-4.55752301143832	5.17604210364512e-06	0.000157462558130009	1	308.5	FFPE-ATAC in FFPE kidney
peak_49775	chr17	29241195	29241641	12.7197446380412	-6.8269972001048	1.49834475289258	-4.55635940054861	5.20478503149675e-06	0.000158178621892218	0	195	FFPE-ATAC in FFPE kidney
peak_49483	chr17	26551558	26551962	12.5830472725678	3.51947565477988	0.775125760555277	4.54052211122313	5.61150932390688e-06	0.000169185892721085	81	14	standard ATAC in FFPE kidney
peak_4943	chr1	135320433	135321176	12.5775456814223	3.51910376838775	0.775076537532555	4.54033066152508	5.61660734871382e-06	0.00016929760866329	153.5	27	standard ATAC in FFPE kidney
peak_24384	chr12	55835131	55835982	12.510246996427	-6.80333156307924	1.49862915257624	-4.53970320234586	5.63334676161414e-06	0.000169676754091577	0	369	FFPE-ATAC in FFPE kidney
peak_100382	chr7	46589791	46590420	12.510246996427	-6.80333156307924	1.49862915257624	-4.53970320234586	5.63334676161414e-06	0.000169676754091577	2	276	FFPE-ATAC in FFPE kidney
peak_118729	chrUn_random	4767713	4768024	12.513334782128	-6.80356719937761	1.49873311056855	-4.53954553442585	5.63756054239643e-06	0.000169676754091577	0	136.5	FFPE-ATAC in FFPE kidney
peak_118745	chrUn_random	5167206	5167408	12.513334782128	-6.80356719937761	1.49873311056855	-4.53954553442585	5.63756054239643e-06	0.000169676754091577	0	89	FFPE-ATAC in FFPE kidney
peak_106606	chr8	19686629	19686989	12.507159210726	-6.80309607629835	1.4986828508351	-4.53938341424771	5.64189645883106e-06	0.000169765223049836	0	159	FFPE-ATAC in FFPE kidney
peak_112345	chr8_random	821502	821773	12.516422567829	-6.80380384326696	1.49899532569563	-4.53890931254876	5.65459466972696e-06	0.00017002106021041	0	117	FFPE-ATAC in FFPE kidney
peak_118703	chrUn_random	4520429	4520758	12.516422567829	-6.80380384326696	1.49899532569563	-4.53890931254876	5.65459466972696e-06	0.00017002106021041	0	141.5	FFPE-ATAC in FFPE kidney
peak_93742	chr6	47997435	47999047	12.5827102824396	3.52026169452039	0.776052386974459	4.53611348100427	5.73003562652995e-06	0.00017203409506137	328	56.5	standard ATAC in FFPE kidney
peak_118778	chrUn_random	5335252	5335600	12.3100127119158	-6.779992260459	1.49953508621947	-4.52139621324386	6.14330785271806e-06	0.000183355039481419	0	150.5	FFPE-ATAC in FFPE kidney
peak_118750	chrUn_random	5172649	5173089	12.3069249262148	-6.77975299488536	1.49951009101987	-4.52131201749647	6.1457522212678e-06	0.000183382970796809	0	190.5	FFPE-ATAC in FFPE kidney
peak_118820	chrUn_random	5881294	5881878	12.3131004976168	-6.78023212062209	1.49972303047047	-4.52098953131039	6.15512324315317e-06	0.000183572473486426	2	252	FFPE-ATAC in FFPE kidney
peak_108553	chr8	72067293	72067517	12.3038371405138	-6.77951343403201	1.4996479797961	-4.52073654975601	6.16248412131466e-06	0.00018374692659394	0	97.5	FFPE-ATAC in FFPE kidney
peak_90403	chr5	127400552	127401055	12.3223638547198	-6.78096399320014	1.50128210302791	-4.51678200887343	6.27864819914885e-06	0.000186981281156622	0.5	212.5	FFPE-ATAC in FFPE kidney
peak_89601	chr5	117807144	117807633	12.1626491542795	4.25612255754204	0.943343135421159	4.51174381593594	6.42968180287179e-06	0.000190871267077975	102.5	11.5	standard ATAC in FFPE kidney
peak_107103	chr8	30329793	30330496	12.0683781687569	3.80275391326965	0.84383909058531	4.50649176566585	6.59082418361834e-06	0.000194988306414548	141.5	21	standard ATAC in FFPE kidney
peak_43731	chr16	3116156	3116715	12.1066906417036	-6.75602589446586	1.50042585590138	-4.50273891768361	6.70832741702391e-06	0.000197886705683838	1	237.5	FFPE-ATAC in FFPE kidney
peak_108044	chr8	56207170	56207652	12.1066906417036	-6.75602589446586	1.50042585590138	-4.50273891768361	6.70832741702391e-06	0.000197886705683838	0.5	204.5	FFPE-ATAC in FFPE kidney
peak_118692	chrUn_random	4252394	4252824	12.1066906417036	-6.75602589446586	1.50042585590138	-4.50273891768361	6.70832741702391e-06	0.000197886705683838	0	184	FFPE-ATAC in FFPE kidney
peak_9301	chr10	21861979	21862955	16.8622918764405	-3.33299005991105	0.740235296242112	-4.50260893641704	6.71243287798828e-06	0.000197896100345076	25	518	FFPE-ATAC in FFPE kidney
peak_14987	chr11	3000321	3000664	12.1097784274046	-6.75626932920673	1.50053480333506	-4.50257422499656	6.7135296454797e-06	0.000197896100345076	0	145.5	FFPE-ATAC in FFPE kidney
peak_57459	chr19	4818689	4819080	12.1097784274046	-6.75626932920673	1.50053480333506	-4.50257422499656	6.7135296454797e-06	0.000197896100345076	0	167	FFPE-ATAC in FFPE kidney
peak_43745	chr16	3349876	3350447	12.1036028560026	-6.7557826101072	1.50048511526262	-4.50239895177154	6.71907032557387e-06	0.000197947920224613	0	242.5	FFPE-ATAC in FFPE kidney
peak_118645	chrUn_random	3572818	3573188	12.1036028560026	-6.7557826101072	1.50048511526262	-4.50239895177154	6.71907032557387e-06	0.000197947920224613	0	158	FFPE-ATAC in FFPE kidney
peak_85094	chr5	20484312	20485324	12.1128662131056	-6.75651383171258	1.5008126160459	-4.50190367503277	6.73475050681302e-06	0.000198281232891794	1.5	429.5	FFPE-ATAC in FFPE kidney
peak_114168	chr9	50166144	50166632	12.1159539988066	-6.75676030628596	1.5012611465739	-4.50072282341141	6.77227694608537e-06	0.000199193098154832	0	205	FFPE-ATAC in FFPE kidney
peak_118798	chrUn_random	5556150	5556361	12.1159539988066	-6.75676030628596	1.5012611465739	-4.50072282341141	6.77227694608537e-06	0.000199193098154832	0	88	FFPE-ATAC in FFPE kidney
peak_106654	chr8	19924789	19925037	16.4597616430202	-4.08911333266586	0.910197121186741	-4.49255797176589	7.03727532679009e-06	0.000205977734558895	4	134.5	FFPE-ATAC in FFPE kidney
peak_49774	chr17	29239846	29240419	11.9064563571924	-6.73190212454671	1.50145313139627	-4.48359125155402	7.33971941980283e-06	0.000213813959153825	0	241.5	FFPE-ATAC in FFPE kidney
peak_49777	chr17	29243169	29243586	11.9064563571924	-6.73190212454671	1.50145313139627	-4.48359125155402	7.33971941980283e-06	0.000213813959153825	0	174	FFPE-ATAC in FFPE kidney
peak_84870	chr5	14987584	14988047	11.9064563571924	-6.73190212454671	1.50145313139627	-4.48359125155402	7.33971941980283e-06	0.000213813959153825	0	193	FFPE-ATAC in FFPE kidney
peak_106627	chr8	19772268	19772898	11.9064563571924	-6.73190212454671	1.50145313139627	-4.48359125155402	7.33971941980283e-06	0.000213813959153825	1	262.5	FFPE-ATAC in FFPE kidney
peak_106637	chr8	19855273	19855588	11.9064563571924	-6.73190212454671	1.50145313139627	-4.48359125155402	7.33971941980283e-06	0.000213813959153825	0	130.5	FFPE-ATAC in FFPE kidney
peak_118665	chrUn_random	3916075	3916399	11.9064563571924	-6.73190212454671	1.50145313139627	-4.48359125155402	7.33971941980283e-06	0.000213813959153825	0	135	FFPE-ATAC in FFPE kidney
peak_118670	chrUn_random	3927744	3928537	11.9095441428933	-6.7321501784062	1.50165153388501	-4.48316405403927	7.35443450178309e-06	0.000214191297502338	1	329	FFPE-ATAC in FFPE kidney
peak_101065	chr7	67034288	67034506	11.9126319285943	-6.73239979978937	1.50202546032741	-4.48221416854136	7.38725506540944e-06	0.000214838343246754	0	89.5	FFPE-ATAC in FFPE kidney
peak_111543	chr8	124235572	124236000	11.9126319285943	-6.73239979978937	1.50202546032741	-4.48221416854136	7.38725506540944e-06	0.000214838343246754	0	174.5	FFPE-ATAC in FFPE kidney
peak_84352	chr4	154010354	154010647	12.0848829421936	3.80393253604164	0.84889094776867	4.48106149092574	7.42727065191234e-06	0.000215875050782839	55.5	7	standard ATAC in FFPE kidney
peak_76866	chr4	3009327	3009923	11.9157197142953	-6.73265191337413	1.50257749190665	-4.4807352363777	7.43863426978364e-06	0.000216125749610893	2	247	FFPE-ATAC in FFPE kidney
peak_10592	chr10	57690746	57691008	11.7031342869801	-6.70711640066143	1.50250086441218	-4.46396841394527	8.04554300611797e-06	0.00023140081523699	0.5	107	FFPE-ATAC in FFPE kidney
peak_41424	chr15	75409203	75409931	11.7031342869801	-6.70711640066143	1.50250086441218	-4.46396841394527	8.04554300611797e-06	0.00023140081523699	1	299	FFPE-ATAC in FFPE kidney
peak_118777	chrUn_random	5332824	5333075	11.7031342869801	-6.70711640066143	1.50250086441218	-4.46396841394527	8.04554300611797e-06	0.00023140081523699	0	102.5	FFPE-ATAC in FFPE kidney
peak_118829	chrUn_random	5897307	5897508	11.7031342869801	-6.70711640066143	1.50250086441218	-4.46396841394527	8.04554300611797e-06	0.00023140081523699	0	83	FFPE-ATAC in FFPE kidney
peak_25586	chr12	82960736	82962061	13.2838596928979	3.07181332946574	0.688160076058903	4.46380636763764	8.0516333270111e-06	0.00023140081523699	281	59.5	standard ATAC in FFPE kidney
peak_118675	chrUn_random	4058755	4059032	11.7062220726811	-6.70736845605917	1.50261457763282	-4.4637983391761	8.05193518189979e-06	0.00023140081523699	0	114.5	FFPE-ATAC in FFPE kidney
peak_118827	chrUn_random	5893671	5894259	11.7000465012791	-6.70686449238277	1.50256741217923	-4.46360305568957	8.05928080234779e-06	0.000231557175952873	1.5	244	FFPE-ATAC in FFPE kidney
peak_18877	chr11	77500582	77500996	13.2893612840434	3.07217334123657	0.688777605158884	4.46032698831417	8.18346990988648e-06	0.000234736983512374	85	20.5	standard ATAC in FFPE kidney
peak_118747	chrUn_random	5168959	5169275	11.5029000024689	-6.68215379194135	1.50370805143732	-4.44378400817514	8.83903433124396e-06	0.000251641304319284	0	127.5	FFPE-ATAC in FFPE kidney
peak_112342	chr8_random	817639	817840	11.4998122167679	-6.68189725133579	1.50368508429465	-4.4436812741746	8.84325809734139e-06	0.0002517026053255	0	81.5	FFPE-ATAC in FFPE kidney
peak_118749	chrUn_random	5171562	5171866	11.4905488596649	-6.68112139868477	1.50474596047271	-4.44003278572412	8.99451740227548e-06	0.000255529215585468	0	124	FFPE-ATAC in FFPE kidney
peak_106672	chr8	20011677	20012464	15.9550696001972	-3.59627873447154	0.810762630702891	-4.43567401639336	9.17846526331035e-06	0.000260389953621718	18	403	FFPE-ATAC in FFPE kidney
peak_24385	chr12	55839137	55840287	15.8494584422553	-4.03099456401237	0.911033091746657	-4.42464121284995	9.66026974957401e-06	0.000272848752750282	14	598.5	FFPE-ATAC in FFPE kidney
peak_118823	chrUn_random	5883811	5884068	11.2995779322567	-6.65649051401032	1.50493891936668	-4.42309679705245	9.72961226932804e-06	0.000274679653021039	0.5	102	FFPE-ATAC in FFPE kidney
peak_49778	chr17	29244260	29244946	11.3026657179577	-6.65675220093178	1.50505840062128	-4.42291953467315	9.73760149894626e-06	0.000274713805666722	0	267.5	FFPE-ATAC in FFPE kidney
peak_118726	chrUn_random	4764478	4765025	11.3026657179577	-6.65675220093178	1.50505840062128	-4.42291953467315	9.73760149894626e-06	0.000274713805666722	1	215	FFPE-ATAC in FFPE kidney
peak_118727	chrUn_random	4765579	4765800	11.3026657179577	-6.65675220093178	1.50505840062128	-4.42291953467315	9.73760149894626e-06	0.000274713805666722	0	86.5	FFPE-ATAC in FFPE kidney
peak_89565	chr5	117016988	117017688	11.2964901465557	-6.65622897038249	1.50501364157507	-4.42270341378197	9.74735056242242e-06	0.000274861267402069	2	280.5	FFPE-ATAC in FFPE kidney
peak_118792	chrUn_random	5490594	5490818	11.2964901465557	-6.65622897038249	1.50501364157507	-4.42270341378197	9.74735056242242e-06	0.000274861267402069	0	89	FFPE-ATAC in FFPE kidney
peak_92327	chr6	9839801	9840299	17.3673360603102	-4.78213211451826	1.08159020554183	-4.42138999596676	9.80679872810133e-06	0.000276281270123502	5	291.5	FFPE-ATAC in FFPE kidney
peak_27622	chr13	3372057	3373118	15.7520845201132	-3.57678963332341	0.811082587790852	-4.40989572105785	1.03420408360068e-05	0.000289149000043316	25	538	FFPE-ATAC in FFPE kidney
peak_118101	chr9	118835459	118835802	11.5564598605188	4.17829667289727	0.947587764077805	4.40940336219264	1.03655800432469e-05	0.000289740485715627	67.5	8.5	standard ATAC in FFPE kidney
peak_104080	chr7	124523873	124524957	12.4746853190532	3.21798293715928	0.730047405499299	4.40790955891202	1.04373108581644e-05	0.000291544406516979	215.5	47.5	standard ATAC in FFPE kidney
peak_20981	chr11	102807826	102808309	11.9741071832344	3.44146978564272	0.781205472574522	4.40533240800413	1.05621785293331e-05	0.000294693750456701	92	16.5	standard ATAC in FFPE kidney
peak_41824	chr15	79091639	79091980	12.4719345234804	3.21779339989128	0.730585042154215	4.40440635138552	1.060739506412e-05	0.000295683873784609	68	14.5	standard ATAC in FFPE kidney
peak_10588	chr10	57685919	57686145	11.0993436477454	-6.63062879173517	1.50633664398276	-4.40182400011444	1.07344618750179e-05	0.000298763922425561	0	88	FFPE-ATAC in FFPE kidney
peak_72052	chr3	56379277	56379775	11.0993436477454	-6.63062879173517	1.50633664398276	-4.40182400011444	1.07344618750179e-05	0.000298763922425561	1	192.5	FFPE-ATAC in FFPE kidney
peak_112326	chr8_random	734704	735050	11.0993436477454	-6.63062879173517	1.50633664398276	-4.40182400011444	1.07344618750179e-05	0.000298763922425561	0	135.5	FFPE-ATAC in FFPE kidney
peak_118779	chrUn_random	5336507	5337290	11.0993436477454	-6.63062879173517	1.50633664398276	-4.40182400011444	1.07344618750179e-05	0.000298763922425561	0	306	FFPE-ATAC in FFPE kidney
peak_118720	chrUn_random	4747049	4747543	11.0962558620445	-6.63036209525398	1.50631484016814	-4.40171066396311	1.07400718390422e-05	0.000298763922425561	0	192	FFPE-ATAC in FFPE kidney
peak_28205	chr13	20070078	20071008	11.1024314334464	-6.63089617262686	1.50656062610328	-4.40134705350536	1.07580888975504e-05	0.000298924872855273	2	361.5	FFPE-ATAC in FFPE kidney
peak_106621	chr8	19753658	19753952	11.1024314334464	-6.63089617262686	1.50656062610328	-4.40134705350536	1.07580888975504e-05	0.000298924872855273	0	113.5	FFPE-ATAC in FFPE kidney
peak_112321	chr8_random	699298	699601	11.1024314334464	-6.63089617262686	1.50656062610328	-4.40134705350536	1.07580888975504e-05	0.000298924872855273	0	116	FFPE-ATAC in FFPE kidney
peak_118662	chrUn_random	3907117	3907959	11.1024314334464	-6.63089617262686	1.50656062610328	-4.40134705350536	1.07580888975504e-05	0.000298924872855273	0.5	326.5	FFPE-ATAC in FFPE kidney
peak_1133	chr1	39957153	39958370	11.9737701931062	3.4422913869038	0.782216892159287	4.40068658885831	1.07908890554054e-05	0.000299630798796553	232.5	45.5	standard ATAC in FFPE kidney
peak_112305	chr8_random	384196	384453	11.0900802906425	-6.62982640897427	1.50687926642538	-4.39970643746499	1.08397416273447e-05	0.000300849851869072	0	100.5	FFPE-ATAC in FFPE kidney
peak_79295	chr4	70039006	70039438	15.6495611478723	-4.01198412863203	0.912346416673068	-4.39743506996169	1.09537637953971e-05	0.000303541466828941	6.5	223	FFPE-ATAC in FFPE kidney
peak_84920	chr5	15196099	15196799	10.8991093632342	-6.60429574816779	1.50788669677089	-4.37983554222659	1.18768909604178e-05	0.000326283022081861	2	265	FFPE-ATAC in FFPE kidney
peak_112347	chr8_random	836538	836868	10.8929337918322	-6.60375109303245	1.5078441761829	-4.37959783732416	1.1889853126674e-05	0.000326417819668248	0	125.5	FFPE-ATAC in FFPE kidney
peak_118664	chrUn_random	3910745	3911344	10.8929337918322	-6.60375109303245	1.5078441761829	-4.37959783732416	1.1889853126674e-05	0.000326417819668248	1	229	FFPE-ATAC in FFPE kidney
peak_101063	chr7	67024141	67024414	10.9052849346362	-6.60484542611637	1.50877557555981	-4.37761953010521	1.1998256228718e-05	0.000328873961710907	0	103	FFPE-ATAC in FFPE kidney
peak_31846	chr13	95626997	95627494	10.9083727203372	-6.60512488766532	1.50954486489095	-4.37557375159066	1.21113482349209e-05	0.000331450683662746	1	184.5	FFPE-ATAC in FFPE kidney
peak_84898	chr5	15126459	15126673	10.8836704347292	-6.60292396675618	1.50937453232804	-4.37460936655125	1.21650122242912e-05	0.000332544984491508	0	82.5	FFPE-ATAC in FFPE kidney
peak_118799	chrUn_random	5557048	5557881	10.695787293022	-6.57719545328026	1.50935801116163	-4.35761125236174	1.31489665143058e-05	0.000356158860371006	2	312	FFPE-ATAC in FFPE kidney
peak_118751	chrUn_random	5174823	5175180	10.692699507321	-6.57691749042011	1.50933726615228	-4.35748698313566	1.31564320498657e-05	0.000356281689844034	1	136	FFPE-ATAC in FFPE kidney
peak_94354	chr6	55580626	55581143	10.701962864424	-6.57775468372716	1.51005973572296	-4.35595660762252	1.32487022930862e-05	0.000357692087132996	1	191.5	FFPE-ATAC in FFPE kidney
peak_106636	chr8	19854717	19855178	10.701962864424	-6.57775468372716	1.51005973572296	-4.35595660762252	1.32487022930862e-05	0.000357692087132996	1	172	FFPE-ATAC in FFPE kidney
peak_110716	chr8	112660087	112660736	10.701962864424	-6.57775468372716	1.51005973572296	-4.35595660762252	1.32487022930862e-05	0.000357692087132996	1	238	FFPE-ATAC in FFPE kidney
peak_106613	chr8	19709159	19709457	16.5633111365643	-4.71109101153631	1.0841336920894	-4.34548897973722	1.38965748977698e-05	0.000373331100745301	2	165	FFPE-ATAC in FFPE kidney
peak_106667	chr8	19991139	19991355	16.548907751154	-3.01083597879916	0.693084167237448	-4.34411305455151	1.39839490102937e-05	0.00037488826572395	7	113	FFPE-ATAC in FFPE kidney
peak_14990	chr11	3003784	3004135	10.4924652228098	-6.54957588238378	1.51098192370769	-4.33464873379308	1.45993053392808e-05	0.000388688119637392	1	130.5	FFPE-ATAC in FFPE kidney
peak_92084	chr6	3334151	3335486	10.4924652228098	-6.54957588238378	1.51098192370769	-4.33464873379308	1.45993053392808e-05	0.000388688119637392	3	490.5	FFPE-ATAC in FFPE kidney
peak_118730	chrUn_random	4770133	4771520	10.4924652228098	-6.54957588238378	1.51098192370769	-4.33464873379308	1.45993053392808e-05	0.000388688119637392	4	513.5	FFPE-ATAC in FFPE kidney
peak_118828	chrUn_random	5896430	5897244	10.4924652228098	-6.54957588238378	1.51098192370769	-4.33464873379308	1.45993053392808e-05	0.000388688119637392	0	299.5	FFPE-ATAC in FFPE kidney
peak_84897	chr5	15122370	15122617	10.4955530085108	-6.54986013147451	1.51111661667468	-4.33445047139245	1.46124681467393e-05	0.000388783120549401	0	90.5	FFPE-ATAC in FFPE kidney
peak_118813	chrUn_random	5813596	5813930	10.4955530085108	-6.54986013147451	1.51111661667468	-4.33445047139245	1.46124681467393e-05	0.000388783120549401	0	121.5	FFPE-ATAC in FFPE kidney
peak_118819	chrUn_random	5880593	5881148	10.4955530085108	-6.54986013147451	1.51111661667468	-4.33445047139245	1.46124681467393e-05	0.000388783120549401	0	201	FFPE-ATAC in FFPE kidney
peak_41009	chr15	63886886	63887609	10.4893774371088	-6.54929176810435	1.51107607085495	-4.33419064362447	1.46297354652143e-05	0.00038907222972945	2	269	FFPE-ATAC in FFPE kidney
peak_101067	chr7	67038155	67038365	10.4893774371088	-6.54929176810435	1.51107607085495	-4.33419064362447	1.46297354652143e-05	0.00038907222972945	0	77.5	FFPE-ATAC in FFPE kidney
peak_66845	chr2	124958997	124959405	10.4986407942118	-6.55014571369659	1.51148110505518	-4.33359417579849	1.46694484331474e-05	0.000389872503132299	0	146	FFPE-ATAC in FFPE kidney
peak_109557	chr8	88023332	88023874	10.4986407942118	-6.55014571369659	1.51148110505518	-4.33359417579849	1.46694484331474e-05	0.000389872503132299	2	194.5	FFPE-ATAC in FFPE kidney
peak_14989	chr11	3002644	3002994	10.4862896514078	-6.54900658651834	1.51140002319216	-4.33307296944887	1.47042346148227e-05	0.000390455565031957	0	130.5	FFPE-ATAC in FFPE kidney
peak_84899	chr5	15127739	15127991	10.4862896514078	-6.54900658651834	1.51140002319216	-4.33307296944887	1.47042346148227e-05	0.000390455565031957	0	94.5	FFPE-ATAC in FFPE kidney
peak_101062	chr7	67022921	67023143	10.5048163656137	-6.55072557006212	1.51291289707605	-4.32987621608784	1.49193181340995e-05	0.000395562047907017	0	80	FFPE-ATAC in FFPE kidney
peak_70239	chr2	181651999	181652899	15.1513816665795	-3.51571890055295	0.814582483419237	-4.31597655500226	1.5889884493023e-05	0.000419465346039055	15.5	432	FFPE-ATAC in FFPE kidney
peak_106622	chr8	19756712	19756979	16.1504914247379	-4.6735359365399	1.08386349473611	-4.31192300436114	1.61840795803405e-05	0.000426121171779189	2	145	FFPE-ATAC in FFPE kidney
peak_112324	chr8_random	716415	716702	10.2922309382985	-6.52170689720208	1.51278600501908	-4.31105713271046	1.62475915164494e-05	0.00042742311514946	0	104.5	FFPE-ATAC in FFPE kidney
peak_6552	chr1	167689336	167690008	10.2953187239995	-6.52199805001956	1.5130452297765	-4.31051096270463	1.62877753548582e-05	0.000428109648267672	2	243	FFPE-ATAC in FFPE kidney
peak_118638	chrUn_random	3556481	3556837	10.2953187239995	-6.52199805001956	1.5130452297765	-4.31051096270463	1.62877753548582e-05	0.000428109648267672	0	127.5	FFPE-ATAC in FFPE kidney
peak_108040	chr8	56199128	56199499	10.2984065097005	-6.52229118897774	1.51354585274333	-4.30927888782223	1.63787720171732e-05	0.000429943649642764	0	132.5	FFPE-ATAC in FFPE kidney
peak_8262	chr1	196575598	196576415	10.3014942954015	-6.52258752099617	1.51429195395191	-4.30735136905001	1.65221043395132e-05	0.000433331842918788	0.5	290.5	FFPE-ATAC in FFPE kidney
peak_118709	chrUn_random	4533511	4533746	10.2798797954946	-6.52053742172186	1.5141532234356	-4.30639206178013	1.65938842072311e-05	0.00043493293224835	0	85.5	FFPE-ATAC in FFPE kidney
peak_56390	chr18	69505766	69506164	10.9588599436047	4.09572722113792	0.952137216599041	4.30161446242753	1.69558146422166e-05	0.000443272398100304	72	7.5	standard ATAC in FFPE kidney
peak_76867	chr4	3010412	3011055	14.8455362241264	-3.93092773202852	0.916092236559379	-4.2909737416749	1.7789135108603e-05	0.000462966906517281	11	307.5	FFPE-ATAC in FFPE kidney
peak_106659	chr8	19942750	19943036	10.0889088680863	-6.49299271241724	1.51461310596964	-4.28689853984887	1.8118499564271e-05	0.000469085086625282	0	101	FFPE-ATAC in FFPE kidney
peak_111736	chr8	126067724	126068057	10.0889088680863	-6.49299271241724	1.51461310596964	-4.28689853984887	1.8118499564271e-05	0.000469085086625282	0	118	FFPE-ATAC in FFPE kidney
peak_118642	chrUn_random	3567546	3568033	10.0889088680863	-6.49299271241724	1.51461310596964	-4.28689853984887	1.8118499564271e-05	0.000469085086625282	0	170.5	FFPE-ATAC in FFPE kidney
peak_118775	chrUn_random	5331666	5332109	10.0889088680863	-6.49299271241724	1.51461310596964	-4.28689853984887	1.8118499564271e-05	0.000469085086625282	0	154.5	FFPE-ATAC in FFPE kidney
peak_118790	chrUn_random	5488214	5488508	10.0889088680863	-6.49299271241724	1.51461310596964	-4.28689853984887	1.8118499564271e-05	0.000469085086625282	0	103	FFPE-ATAC in FFPE kidney
peak_1011	chr1	37624168	37624561	10.0919966537873	-6.49329000991163	1.51475767344973	-4.2866856684236	1.81358628686122e-05	0.000469085086625282	1	138.5	FFPE-ATAC in FFPE kidney
peak_84893	chr5	15114799	15115299	10.0919966537873	-6.49329000991163	1.51475767344973	-4.2866856684236	1.81358628686122e-05	0.000469085086625282	2	175.5	FFPE-ATAC in FFPE kidney
peak_106625	chr8	19765954	19766237	10.0919966537873	-6.49329000991163	1.51475767344973	-4.2866856684236	1.81358628686122e-05	0.000469085086625282	0	100	FFPE-ATAC in FFPE kidney
peak_112348	chr8_random	839980	840414	10.0919966537873	-6.49329000991163	1.51475767344973	-4.2866856684236	1.81358628686122e-05	0.000469085086625282	1	153	FFPE-ATAC in FFPE kidney
peak_118797	chrUn_random	5554208	5554965	10.0919966537873	-6.49329000991163	1.51475767344973	-4.2866856684236	1.81358628686122e-05	0.000469085086625282	1	265.5	FFPE-ATAC in FFPE kidney
peak_44604	chr16	18533158	18533550	10.0950844394883	-6.49358872098511	1.51515343545057	-4.28576312408522	1.82112955176866e-05	0.000470628811290827	1	138.5	FFPE-ATAC in FFPE kidney
peak_101061	chr7	67020465	67020687	10.0950844394883	-6.49358872098511	1.51515343545057	-4.28576312408522	1.82112955176866e-05	0.000470628811290827	0	78	FFPE-ATAC in FFPE kidney
peak_106660	chr8	19946435	19946655	10.0950844394883	-6.49358872098511	1.51515343545057	-4.28576312408522	1.82112955176866e-05	0.000470628811290827	0	77	FFPE-ATAC in FFPE kidney
peak_106645	chr8	19884483	19885257	14.632613806683	-3.90858823045007	0.915534708718721	-4.26918629433513	1.96187361995693e-05	0.000502408267824823	10	375.5	FFPE-ATAC in FFPE kidney
peak_118695	chrUn_random	4258552	4259130	9.88867458357509	-6.46399859875811	1.51662386072811	-4.26209739022228	2.02517142889375e-05	0.000517092920777231	0.5	200	FFPE-ATAC in FFPE kidney
peak_55446	chr18	54858579	54859155	9.89176236927608	-6.46430344604412	1.51690528469765	-4.26150763086872	2.0305241943818e-05	0.000517698496572628	2	200	FFPE-ATAC in FFPE kidney
peak_72472	chr3	66877444	66877834	9.89176236927608	-6.46430344604412	1.51690528469765	-4.26150763086872	2.0305241943818e-05	0.000517698496572628	0	134.5	FFPE-ATAC in FFPE kidney
peak_77547	chr4	28103932	28104338	9.89176236927608	-6.46430344604412	1.51690528469765	-4.26150763086872	2.0305241943818e-05	0.000517698496572628	1	140.5	FFPE-ATAC in FFPE kidney
peak_118754	chrUn_random	5184653	5185035	9.89176236927608	-6.46430344604412	1.51690528469765	-4.26150763086872	2.0305241943818e-05	0.000517698496572628	0	133	FFPE-ATAC in FFPE kidney
peak_118776	chrUn_random	5332253	5332558	9.89176236927608	-6.46430344604412	1.51690528469765	-4.26150763086872	2.0305241943818e-05	0.000517698496572628	0	104	FFPE-ATAC in FFPE kidney
peak_42690	chr15	90773488	90774045	9.89485015497707	-6.46461040802948	1.51745118126315	-4.26017685962604	2.04265205958845e-05	0.000520027130831015	0	189	FFPE-ATAC in FFPE kidney
peak_84923	chr5	15211312	15211518	9.89485015497707	-6.46461040802948	1.51745118126315	-4.26017685962604	2.04265205958845e-05	0.000520027130831015	0	69.5	FFPE-ATAC in FFPE kidney
peak_93715	chr6	47713057	47713783	24.1249337282398	-6.28942744450404	1.47659501427125	-4.25941262412301	2.04964799707036e-05	0.000521371435689183	3	602.5	FFPE-ATAC in FFPE kidney
peak_14748	chr10	126632626	126632883	11.8657452297197	3.13780688483049	0.736730111754209	4.25909954645282	2.05252054383474e-05	0.000521992902491059	48	12	standard ATAC in FFPE kidney
peak_85437	chr5	28445353	28445774	14.7444005360269	-3.47255055525054	0.815937956071587	-4.25590025492805	2.08209520937385e-05	0.000528298522296645	7	198	FFPE-ATAC in FFPE kidney
peak_93707	chr6	47687968	47688232	15.5467007855032	-4.61631153223224	1.08572059110291	-4.25184119198	2.12020190208281e-05	0.000537070689778692	3	135.5	FFPE-ATAC in FFPE kidney
peak_114064	chr9	47339457	47339657	11.3710056751747	3.35853153188999	0.792056053775619	4.24027001104321	2.23251074824264e-05	0.000562239354877498	35.5	6.5	standard ATAC in FFPE kidney
peak_120840	chrX	137133343	137134299	10.8532487856628	3.63787417726953	0.857983551089838	4.24002788007833	2.23492026471022e-05	0.000562729592086234	170.5	26	standard ATAC in FFPE kidney
peak_68638	chr2	156904640	156905388	10.8587503768083	3.63830792821331	0.858672511844419	4.23713101098143	2.26394048152044e-05	0.000568975936935189	132.5	24.5	standard ATAC in FFPE kidney
peak_49012	chr17	15177394	15177897	9.68535251336287	-6.43409940562506	1.51864887590503	-4.23672615027005	2.26802473978272e-05	0.000569178694192706	0	170.5	FFPE-ATAC in FFPE kidney
peak_93706	chr6	47687175	47687590	9.68535251336287	-6.43409940562506	1.51864887590503	-4.23672615027005	2.26802473978272e-05	0.000569178694192706	0	141	FFPE-ATAC in FFPE kidney
peak_101059	chr7	67004283	67004842	9.68535251336287	-6.43409940562506	1.51864887590503	-4.23672615027005	2.26802473978272e-05	0.000569178694192706	0	188.5	FFPE-ATAC in FFPE kidney
peak_118782	chrUn_random	5341520	5342173	9.68535251336287	-6.43409940562506	1.51864887590503	-4.23672615027005	2.26802473978272e-05	0.000569178694192706	1	223.5	FFPE-ATAC in FFPE kidney
peak_108051	chr8	57990747	57990968	9.68844029906386	-6.4344109886774	1.51880520971525	-4.2364952052566	2.27035766630763e-05	0.00056952901227202	0	75.5	FFPE-ATAC in FFPE kidney
peak_121463	chrX	166443146	166443598	9.68844029906386	-6.4344109886774	1.51880520971525	-4.2364952052566	2.27035766630763e-05	0.00056952901227202	1	154	FFPE-ATAC in FFPE kidney
peak_49005	chr17	15130788	15131092	9.68226472766187	-6.43378795028661	1.51876703769789	-4.23619145701159	2.27342950315945e-05	0.000570181935469519	0	103	FFPE-ATAC in FFPE kidney
peak_31849	chr13	95720555	95721370	9.69152808476485	-6.43472407526922	1.51923723577585	-4.23549655296798	2.28047202080413e-05	0.000571456931860388	2	274.5	FFPE-ATAC in FFPE kidney
peak_118641	chrUn_random	3565277	3565500	9.69152808476485	-6.43472407526922	1.51923723577585	-4.23549655296798	2.28047202080413e-05	0.000571456931860388	0	76	FFPE-ATAC in FFPE kidney
peak_118796	chrUn_random	5553047	5553249	15.343378715291	-4.59658713434218	1.08618327698049	-4.23187065365282	2.31755682522178e-05	0.00058029140659374	2	103.5	FFPE-ATAC in FFPE kidney
peak_68667	chr2	157249864	157250064	11.0586325202728	4.72276883889142	1.11806848201891	4.22404254734331	2.39958717701785e-05	0.000597767906599756	37.5	2	standard ATAC in FFPE kidney
peak_24381	chr12	55814896	55815714	14.2293944420878	-3.86606296377024	0.917337265421365	-4.21444010779877	2.50398587030083e-05	0.000620706644243985	12	384	FFPE-ATAC in FFPE kidney
peak_27178	chr12	113535305	113536256	9.48511822885164	-6.40388544246971	1.52085622033453	-4.21071062263934	2.54568659095656e-05	0.000629556055727733	1	311.5	FFPE-ATAC in FFPE kidney
peak_118669	chrUn_random	3926425	3927078	9.48511822885164	-6.40388544246971	1.52085622033453	-4.21071062263934	2.54568659095656e-05	0.000629556055727733	0	218.5	FFPE-ATAC in FFPE kidney
peak_118723	chrUn_random	4755341	4755674	9.48511822885164	-6.40388544246971	1.52085622033453	-4.21071062263934	2.54568659095656e-05	0.000629556055727733	0	111	FFPE-ATAC in FFPE kidney
peak_119962	chrX	72985106	72985440	9.48511822885164	-6.40388544246971	1.52085622033453	-4.21071062263934	2.54568659095656e-05	0.000629556055727733	0	111.5	FFPE-ATAC in FFPE kidney
peak_101068	chr7	67039890	67040135	9.48203044315064	-6.40356648821105	1.52083707895819	-4.21055389614621	2.54745338926386e-05	0.000629556055727733	0	81	FFPE-ATAC in FFPE kidney
peak_118830	chrUn_random	5898427	5898812	9.48203044315064	-6.40356648821105	1.52083707895819	-4.21055389614621	2.54745338926386e-05	0.000629556055727733	0	128.5	FFPE-ATAC in FFPE kidney
peak_112337	chr8_random	789912	790125	9.48820601455263	-6.40420523844834	1.52116357851991	-4.21007006010466	2.55291509754118e-05	0.00063000927916666	0	71	FFPE-ATAC in FFPE kidney
peak_118637	chrUn_random	3554137	3554377	9.48820601455263	-6.40420523844834	1.52116357851991	-4.21007006010466	2.55291509754118e-05	0.00063000927916666	0	78.5	FFPE-ATAC in FFPE kidney
peak_93668	chr6	46258180	46258563	9.49129380025362	-6.40452729374089	1.52176176732555	-4.20862675831098	2.56927383162679e-05	0.000633274947420679	0	126.5	FFPE-ATAC in FFPE kidney
peak_101066	chr7	67036612	67036854	9.49129380025362	-6.40452729374089	1.52176176732555	-4.20862675831098	2.56927383162679e-05	0.000633274947420679	0	79	FFPE-ATAC in FFPE kidney
peak_106661	chr8	19953272	19953478	9.47585487174866	-6.40292538617645	1.52166636712815	-4.20783788384621	2.57825721729059e-05	0.000634974190362061	0	69.5	FFPE-ATAC in FFPE kidney
peak_47375	chr16	86820988	86821463	14.3411811714316	-3.42937907919153	0.81773145439717	-4.19377175813746	2.74354039738937e-05	0.000670518184294815	10.5	216.5	FFPE-ATAC in FFPE kidney
peak_8678	chr10	11070299	11070710	14.9398223605675	-4.556516917895	1.0874764178225	-4.18999147311966	2.78964937386172e-05	0.000680692365483995	4.5	205.5	FFPE-ATAC in FFPE kidney
peak_84917	chr5	15185334	15185987	14.0257353817473	-3.84336903674799	0.918385990207324	-4.18491688432699	2.85270460958574e-05	0.000694823047805412	9.5	303	FFPE-ATAC in FFPE kidney
peak_84921	chr5	15209121	15209590	9.28179615863941	-6.37269923318355	1.52302168259658	-4.18424721460222	2.86112621368108e-05	0.000696037516589807	0.5	153	FFPE-ATAC in FFPE kidney
peak_106796	chr8	24205839	24206390	9.28179615863941	-6.37269923318355	1.52302168259658	-4.18424721460222	2.86112621368108e-05	0.000696037516589807	0	182	FFPE-ATAC in FFPE kidney
peak_108045	chr8	56208128	56209023	9.28179615863941	-6.37269923318355	1.52302168259658	-4.18424721460222	2.86112621368108e-05	0.000696037516589807	0	294.5	FFPE-ATAC in FFPE kidney
peak_112827	chr9	21092275	21092860	9.28179615863941	-6.37269923318355	1.52302168259658	-4.18424721460222	2.86112621368108e-05	0.000696037516589807	0	190	FFPE-ATAC in FFPE kidney
peak_118697	chrUn_random	4261597	4261962	9.28179615863941	-6.37269923318355	1.52302168259658	-4.18424721460222	2.86112621368108e-05	0.000696037516589807	0	121	FFPE-ATAC in FFPE kidney
peak_119349	chrX	32105486	32105693	9.28179615863941	-6.37269923318355	1.52302168259658	-4.18424721460222	2.86112621368108e-05	0.000696037516589807	0	68	FFPE-ATAC in FFPE kidney
peak_12400	chr10	81166661	81168364	9.28488394434041	-6.37302629582172	1.52319304360367	-4.18399120359951	2.86435198639691e-05	0.000696543478444396	0	554	FFPE-ATAC in FFPE kidney
peak_42155	chr15	82340458	82341611	9.28488394434041	-6.37302629582172	1.52319304360367	-4.18399120359951	2.86435198639691e-05	0.000696543478444396	2	366.5	FFPE-ATAC in FFPE kidney
peak_49003	chr17	15114688	15116500	9.27870837293842	-6.37237230046793	1.52315244754409	-4.18367334848371	2.86836181426226e-05	0.000696821613886845	0	594	FFPE-ATAC in FFPE kidney
peak_79853	chr4	88439557	88439811	9.27870837293842	-6.37237230046793	1.52315244754409	-4.18367334848371	2.86836181426226e-05	0.000696821613886845	0	84	FFPE-ATAC in FFPE kidney
peak_84884	chr5	15040883	15041431	9.27870837293842	-6.37237230046793	1.52315244754409	-4.18367334848371	2.86836181426226e-05	0.000696821613886845	1	176.5	FFPE-ATAC in FFPE kidney
peak_111743	chr8	126116987	126117279	9.27870837293842	-6.37237230046793	1.52315244754409	-4.18367334848371	2.86836181426226e-05	0.000696821613886845	0	96	FFPE-ATAC in FFPE kidney
peak_118771	chrUn_random	5321599	5322424	9.27870837293842	-6.37237230046793	1.52315244754409	-4.18367334848371	2.86836181426226e-05	0.000696821613886845	1	267	FFPE-ATAC in FFPE kidney
peak_6797	chr1	172320184	172320453	9.2879717300414	-6.37335496916772	1.5236679053746	-4.18290294537694	2.87810280931987e-05	0.000698072007007504	0.5	86.5	FFPE-ATAC in FFPE kidney
peak_31223	chr13	73658007	73658536	9.2879717300414	-6.37335496916772	1.5236679053746	-4.18290294537694	2.87810280931987e-05	0.000698072007007504	1.5	167.5	FFPE-ATAC in FFPE kidney
peak_43728	chr16	3114496	3114696	9.2879717300414	-6.37335496916772	1.5236679053746	-4.18290294537694	2.87810280931987e-05	0.000698072007007504	0	63.5	FFPE-ATAC in FFPE kidney
peak_72462	chr3	66526611	66527185	9.2879717300414	-6.37335496916772	1.5236679053746	-4.18290294537694	2.87810280931987e-05	0.000698072007007504	0	184.5	FFPE-ATAC in FFPE kidney
peak_45767	chr16	34573518	34574185	11.053483070174	3.31628112304668	0.79283984541019	4.18278816616608	2.87955676914496e-05	0.000698146069174985	118.5	24	standard ATAC in FFPE kidney
peak_84877	chr5	15005133	15005353	9.29105951574239	-6.3736867113351	1.52445052869811	-4.18097313841878	2.90264156553486e-05	0.000702901831220478	0	70.5	FFPE-ATAC in FFPE kidney
peak_62609	chr2	32006237	32007204	11.5626505828394	3.09608585412871	0.74055736301507	4.18075088946986	2.90548034280996e-05	0.000703449138405398	177.5	44.5	standard ATAC in FFPE kidney
peak_49007	chr17	15143289	15143519	9.27253280153643	-6.37171289562802	1.52432924938563	-4.18001091181325	2.91495108203667e-05	0.000705461105587708	0	76.5	FFPE-ATAC in FFPE kidney
peak_74046	chr3	98257433	98257666	9.29414730144339	-6.37402294322263	1.5255481257179	-4.17818542448348	2.9384405613089e-05	0.000710438719958144	0	73.5	FFPE-ATAC in FFPE kidney
peak_91471	chr5	144175562	144176239	14.7395880760563	-4.53616063384428	1.0883235332431	-4.16802586297747	3.07249079815753e-05	0.000740345433869616	8.5	332.5	FFPE-ATAC in FFPE kidney
peak_93698	chr6	47604777	47605379	22.1013133733488	-6.16169539190068	1.47866024858603	-4.16707989397348	3.085263889885e-05	0.000742247452730798	3	458.5	FFPE-ATAC in FFPE kidney
peak_106653	chr8	19924208	19924712	14.7306617090815	-4.5360862207576	1.08869829954928	-4.16652273879323	3.09281055863768e-05	0.000743767404055849	6	248.5	FFPE-ATAC in FFPE kidney
peak_121457	chrX	166427418	166427686	14.7299877288251	-4.53498840279919	1.08874018760177	-4.16535409865658	3.10869681546814e-05	0.000746996678544314	2	134.5	FFPE-ATAC in FFPE kidney
peak_109998	chr8	97056734	97057403	11.5709029695577	3.0967092799035	0.743705957670591	4.16388930055489	3.12871850257733e-05	0.000750768922319997	120	30	standard ATAC in FFPE kidney
peak_81748	chr4	124334528	124335028	11.0675740381661	3.3164684842834	0.797086148259324	4.16074033092395	3.17217601968101e-05	0.000759847104741878	86.5	18	standard ATAC in FFPE kidney
peak_12402	chr10	81325746	81327386	9.08156187412818	-6.34115799458709	1.52530640574702	-4.15730109746802	3.22029439405954e-05	0.000769402255737921	1	515.5	FFPE-ATAC in FFPE kidney
peak_49013	chr17	15177972	15179256	9.08156187412818	-6.34115799458709	1.52530640574702	-4.15730109746802	3.22029439405954e-05	0.000769402255737921	0	408	FFPE-ATAC in FFPE kidney
peak_49070	chr17	17315381	17316784	9.08156187412818	-6.34115799458709	1.52530640574702	-4.15730109746802	3.22029439405954e-05	0.000769402255737921	0	443	FFPE-ATAC in FFPE kidney
peak_53304	chr18	4198076	4199252	9.08156187412818	-6.34115799458709	1.52530640574702	-4.15730109746802	3.22029439405954e-05	0.000769402255737921	3	372	FFPE-ATAC in FFPE kidney
peak_118773	chrUn_random	5324524	5324799	9.08156187412818	-6.34115799458709	1.52530640574702	-4.15730109746802	3.22029439405954e-05	0.000769402255737921	0	88.5	FFPE-ATAC in FFPE kidney
peak_118794	chrUn_random	5547275	5549574	9.08156187412818	-6.34115799458709	1.52530640574702	-4.15730109746802	3.22029439405954e-05	0.000769402255737921	1	723	FFPE-ATAC in FFPE kidney
peak_49008	chr17	15146059	15147892	9.07847408842719	-6.34082310344371	1.52528511008115	-4.15713958101012	3.22257113593847e-05	0.000769643688741108	0	595	FFPE-ATAC in FFPE kidney
peak_73843	chr3	96050172	96050513	9.07847408842719	-6.34082310344371	1.52528511008115	-4.15713958101012	3.22257113593847e-05	0.000769643688741108	0	108.5	FFPE-ATAC in FFPE kidney
peak_41202	chr15	71567308	71568650	9.08464965982918	-6.34149379002065	1.52564515073721	-4.15659813617626	3.23021452319536e-05	0.000771166139626317	1.5	428	FFPE-ATAC in FFPE kidney
peak_93659	chr6	44742824	44743349	9.08464965982918	-6.34149379002065	1.52564515073721	-4.15659813617626	3.23021452319536e-05	0.000771166139626317	0	168	FFPE-ATAC in FFPE kidney
peak_106651	chr8	19918042	19918464	9.0753863027262	-6.34048757177754	1.52558132702116	-4.15611246642481	3.23708520377735e-05	0.000772048314129861	0	135.5	FFPE-ATAC in FFPE kidney
peak_118752	chrUn_random	5176872	5177335	9.0753863027262	-6.34048757177754	1.52558132702116	-4.15611246642481	3.23708520377735e-05	0.000772048314129861	1	148	FFPE-ATAC in FFPE kidney
peak_118822	chrUn_random	5883280	5883634	9.0753863027262	-6.34048757177754	1.52558132702116	-4.15611246642481	3.23708520377735e-05	0.000772048314129861	1.5	114.5	FFPE-ATAC in FFPE kidney
peak_107538	chr8	41501423	41502176	9.08773744553017	-6.34183202025229	1.52630438025742	-4.15502445140249	3.2525275773569e-05	0.000774971114099988	1	235	FFPE-ATAC in FFPE kidney
peak_79849	chr4	88433746	88433970	9.09391301693216	-6.34252167049575	1.52861227704086	-4.14920236201021	3.33635778179596e-05	0.000792459940184143	0	69.5	FFPE-ATAC in FFPE kidney
peak_112343	chr8_random	818066	818382	14.5328412300149	-4.51453892279022	1.08919769306443	-4.14482967741942	3.40066380023138e-05	0.000805844628092257	3	155	FFPE-ATAC in FFPE kidney
peak_104928	chr7	137977889	137978231	14.6439388281838	-3.10707213992419	0.749698484486298	-4.14442899941726	3.40661480981284e-05	0.00080699506525136	8.5	155.5	FFPE-ATAC in FFPE kidney
peak_43471	chr15	101026643	101027212	13.9314492453062	-3.38385527108727	0.81904973572997	-4.13144052610119	3.60496967650746e-05	0.000847812988498651	13.5	254	FFPE-ATAC in FFPE kidney
peak_118780	chrUn_random	5338906	5339419	8.87823980391596	-6.30856919727613	1.52752903435284	-4.12991770067982	3.62893117073404e-05	0.000852623480554915	0	158	FFPE-ATAC in FFPE kidney
peak_79846	chr4	88427872	88428155	8.88132758961696	-6.30891269834545	1.5277175472755	-4.12963293482924	3.63342868143302e-05	0.000853185482383087	0	86.5	FFPE-ATAC in FFPE kidney
peak_118766	chrUn_random	5254606	5255133	8.88132758961696	-6.30891269834545	1.5277175472755	-4.12963293482924	3.63342868143302e-05	0.000853185482383087	0	162.5	FFPE-ATAC in FFPE kidney
peak_118815	chrUn_random	5816680	5816931	8.88132758961696	-6.30891269834545	1.5277175472755	-4.12963293482924	3.63342868143302e-05	0.000853185482383087	0.5	77	FFPE-ATAC in FFPE kidney
peak_77126	chr4	10844657	10845043	8.87515201821497	-6.30822583063263	1.52767344583039	-4.1293025337648	3.63865357425629e-05	0.000853752717816816	0.5	120.5	FFPE-ATAC in FFPE kidney
peak_106634	chr8	19800443	19802759	8.87515201821497	-6.30822583063263	1.52767344583039	-4.1293025337648	3.63865357425629e-05	0.000853752717816816	9	712.5	FFPE-ATAC in FFPE kidney
peak_111744	chr8	126118630	126118894	8.87515201821497	-6.30822583063263	1.52767344583039	-4.1293025337648	3.63865357425629e-05	0.000853752717816816	0	83.5	FFPE-ATAC in FFPE kidney
peak_11253	chr10	67687762	67688464	8.88441537531795	-6.30925793818758	1.52824058879241	-4.12844547151639	3.652240250314e-05	0.000855949361459747	2	217.5	FFPE-ATAC in FFPE kidney
peak_112320	chr8_random	697135	697368	13.6341931796996	-3.79858999359979	0.922160303074205	-4.11922957530966	3.80141264321439e-05	0.00088617276466637	3	102.5	FFPE-ATAC in FFPE kidney
peak_70240	chr2	181653240	181653972	8.67800551940473	-6.27557842288506	1.52991465629006	-4.10191404931235	4.09746488773772e-05	0.000947146266615229	1	222.5	FFPE-ATAC in FFPE kidney
peak_74061	chr3	98367594	98368292	8.67800551940473	-6.27557842288506	1.52991465629006	-4.10191404931235	4.09746488773772e-05	0.000947146266615229	0	211.5	FFPE-ATAC in FFPE kidney
peak_79851	chr4	88436703	88436979	8.67800551940473	-6.27557842288506	1.52991465629006	-4.10191404931235	4.09746488773772e-05	0.000947146266615229	0	83.5	FFPE-ATAC in FFPE kidney
peak_103382	chr7	113357239	113358793	8.67800551940473	-6.27557842288506	1.52991465629006	-4.10191404931235	4.09746488773772e-05	0.000947146266615229	3	465	FFPE-ATAC in FFPE kidney
peak_118761	chrUn_random	5242812	5243138	8.67800551940473	-6.27557842288506	1.52991465629006	-4.10191404931235	4.09746488773772e-05	0.000947146266615229	0	97	FFPE-ATAC in FFPE kidney
peak_118768	chrUn_random	5256121	5256534	8.67800551940473	-6.27557842288506	1.52991465629006	-4.10191404931235	4.09746488773772e-05	0.000947146266615229	0	124	FFPE-ATAC in FFPE kidney
peak_84911	chr5	15167683	15167905	8.67491773370374	-6.2752265389984	1.52989212204057	-4.10174446197454	4.10046979075155e-05	0.000947300474425924	0	67.5	FFPE-ATAC in FFPE kidney
peak_106617	chr8	19737089	19737309	8.67491773370374	-6.2752265389984	1.52989212204057	-4.10174446197454	4.10046979075155e-05	0.000947300474425924	0	66.5	FFPE-ATAC in FFPE kidney
peak_111750	chr8	126142437	126142767	8.67491773370374	-6.2752265389984	1.52989212204057	-4.10174446197454	4.10046979075155e-05	0.000947300474425924	0	101.5	FFPE-ATAC in FFPE kidney
peak_21055	chr11	103282112	103282635	8.68109330510572	-6.27593128119962	1.53028735105856	-4.10114562919068	4.11109719253082e-05	0.000947954133370288	0	156.5	FFPE-ATAC in FFPE kidney
peak_52634	chr17	81971054	81971572	8.68109330510572	-6.27593128119962	1.53028735105856	-4.10114562919068	4.11109719253082e-05	0.000947954133370288	1	158	FFPE-ATAC in FFPE kidney
peak_53303	chr18	4197541	4197890	8.68109330510572	-6.27593128119962	1.53028735105856	-4.10114562919068	4.11109719253082e-05	0.000947954133370288	0	105.5	FFPE-ATAC in FFPE kidney
peak_57045	chr18	81410436	81410809	8.68109330510572	-6.27593128119962	1.53028735105856	-4.10114562919068	4.11109719253082e-05	0.000947954133370288	0	112	FFPE-ATAC in FFPE kidney
peak_61891	chr2	25016542	25017051	8.68109330510572	-6.27593128119962	1.53028735105856	-4.10114562919068	4.11109719253082e-05	0.000947954133370288	2	151	FFPE-ATAC in FFPE kidney
peak_65940	chr2	105098012	105099216	8.68109330510572	-6.27593128119962	1.53028735105856	-4.10114562919068	4.11109719253082e-05	0.000947954133370288	3.5	364	FFPE-ATAC in FFPE kidney
peak_94802	chr6	72256011	72256520	8.68109330510572	-6.27593128119962	1.53028735105856	-4.10114562919068	4.11109719253082e-05	0.000947954133370288	0.5	153.5	FFPE-ATAC in FFPE kidney
peak_99561	chr7	25648136	25649047	8.68109330510572	-6.27593128119962	1.53028735105856	-4.10114562919068	4.11109719253082e-05	0.000947954133370288	3.5	272	FFPE-ATAC in FFPE kidney
peak_111737	chr8	126071111	126071322	8.68109330510572	-6.27593128119962	1.53028735105856	-4.10114562919068	4.11109719253082e-05	0.000947954133370288	0	64	FFPE-ATAC in FFPE kidney
peak_121490	chrY	1937017	1937376	8.68109330510572	-6.27593128119962	1.53028735105856	-4.10114562919068	4.11109719253082e-05	0.000947954133370288	0	106.5	FFPE-ATAC in FFPE kidney
peak_74062	chr3	98368780	98369720	8.67182994800274	-6.27487395044658	1.53021982338211	-4.1006356436932	4.12016843542005e-05	0.000949325541477262	0	287.5	FFPE-ATAC in FFPE kidney
peak_111742	chr8	126110209	126110451	8.67182994800274	-6.27487395044658	1.53021982338211	-4.1006356436932	4.12016843542005e-05	0.000949325541477262	0	74	FFPE-ATAC in FFPE kidney
peak_121464	chrX	166444957	166445360	8.67182994800274	-6.27487395044658	1.53021982338211	-4.1006356436932	4.12016843542005e-05	0.000949325541477262	1	122.5	FFPE-ATAC in FFPE kidney
peak_108661	chr8	72968266	72968768	8.68418109080672	-6.27628677751046	1.53101376047775	-4.09943198391106	4.14165361044469e-05	0.000953191933926728	1	148.5	FFPE-ATAC in FFPE kidney
peak_112304	chr8_random	375746	375993	8.68418109080672	-6.27628677751046	1.53101376047775	-4.09943198391106	4.14165361044469e-05	0.000953191933926728	0	74	FFPE-ATAC in FFPE kidney
peak_118708	chrUn_random	4532707	4533080	8.66874216230175	-6.27451898258029	1.53090147316613	-4.09857792455034	4.1569628908447e-05	0.000956172255180028	0	115.5	FFPE-ATAC in FFPE kidney
peak_85550	chr5	31259287	31259515	8.68726887650771	-6.27664654102984	1.53210113593235	-4.09675731831516	4.18977723912109e-05	0.00096262725438767	0	67.5	FFPE-ATAC in FFPE kidney
peak_121136	chrX	156425861	156426666	11.2537173546852	3.05355270402884	0.746204270248741	4.09211368223739	4.27458990895075e-05	0.000979337066889726	145	37.5	standard ATAC in FFPE kidney
peak_49522	chr17	26757509	26757733	13.7346397366242	-3.36169237851396	0.822418394168641	-4.0875695416713	4.35916028609247e-05	0.000997209185206144	5	97.5	FFPE-ATAC in FFPE kidney
peak_57037	chr18	81183193	81183828	10.2498102874749	3.54813319320781	0.868439569536322	4.08564201548559	4.39551051712638e-05	0.00100439067763901	106	16.5	standard ATAC in FFPE kidney
peak_71236	chr3	35579274	35580001	20.4991021071307	-6.05100564882589	1.48128903954173	-4.08495944228273	4.4084516119534e-05	0.00100691098902579	3	508.5	FFPE-ATAC in FFPE kidney
peak_106642	chr8	19878464	19878719	13.9262997952074	-4.45085668420647	1.09094729568228	-4.07980908135706	4.50727038441472e-05	0.00102683998690216	2	120	FFPE-ATAC in FFPE kidney
peak_33433	chr13_random	132412	133063	8.47468344919251	-6.24145525579177	1.5322726855162	-4.07333193026875	4.63452992611207e-05	0.00104921347596707	0	195.5	FFPE-ATAC in FFPE kidney
peak_49069	chr17	17257521	17259022	8.47468344919251	-6.24145525579177	1.5322726855162	-4.07333193026875	4.63452992611207e-05	0.00104921347596707	2	441.5	FFPE-ATAC in FFPE kidney
peak_74053	chr3	98314044	98314379	8.47468344919251	-6.24145525579177	1.5322726855162	-4.07333193026875	4.63452992611207e-05	0.00104921347596707	0	99	FFPE-ATAC in FFPE kidney
peak_108050	chr8	57983944	57984219	8.47468344919251	-6.24145525579177	1.5322726855162	-4.07333193026875	4.63452992611207e-05	0.00104921347596707	0	83.5	FFPE-ATAC in FFPE kidney
peak_111748	chr8	126130437	126130787	8.47468344919251	-6.24145525579177	1.5322726855162	-4.07333193026875	4.63452992611207e-05	0.00104921347596707	0.5	105.5	FFPE-ATAC in FFPE kidney
peak_118810	chrUn_random	5807368	5807720	8.47468344919251	-6.24145525579177	1.5322726855162	-4.07333193026875	4.63452992611207e-05	0.00104921347596707	1	106	FFPE-ATAC in FFPE kidney
peak_35531	chr14	47449857	47450150	8.4777712348935	-6.24181644488141	1.53247917969852	-4.07301875782047	4.64076851612377e-05	0.00104921347596707	0	87	FFPE-ATAC in FFPE kidney
peak_44886	chr16	23056947	23057357	8.4777712348935	-6.24181644488141	1.53247917969852	-4.07301875782047	4.64076851612377e-05	0.00104921347596707	1	121	FFPE-ATAC in FFPE kidney
peak_51753	chr17	66196418	66197005	8.4777712348935	-6.24181644488141	1.53247917969852	-4.07301875782047	4.64076851612377e-05	0.00104921347596707	1	175.5	FFPE-ATAC in FFPE kidney
peak_101788	chr7	82139215	82139924	8.4777712348935	-6.24181644488141	1.53247917969852	-4.07301875782047	4.64076851612377e-05	0.00104921347596707	1.5	208	FFPE-ATAC in FFPE kidney
peak_103373	chr7	113100815	113102241	8.4777712348935	-6.24181644488141	1.53247917969852	-4.07301875782047	4.64076851612377e-05	0.00104921347596707	0	417.5	FFPE-ATAC in FFPE kidney
peak_118636	chrUn_random	3552960	3553284	8.4777712348935	-6.24181644488141	1.53247917969852	-4.07301875782047	4.64076851612377e-05	0.00104921347596707	0	95.5	FFPE-ATAC in FFPE kidney
peak_17377	chr11	55914242	55914919	8.47159566349151	-6.24109420221447	1.53243390554056	-4.07266778661685	4.64776954368287e-05	0.00104921347596707	1	201.5	FFPE-ATAC in FFPE kidney
peak_42158	chr15	82343250	82343585	8.47159566349151	-6.24109420221447	1.53243390554056	-4.07266778661685	4.64776954368287e-05	0.00104921347596707	0	99.5	FFPE-ATAC in FFPE kidney
peak_49010	chr17	15162063	15162455	8.47159566349151	-6.24109420221447	1.53243390554056	-4.07266778661685	4.64776954368287e-05	0.00104921347596707	0	119	FFPE-ATAC in FFPE kidney
peak_106620	chr8	19751776	19752259	8.47159566349151	-6.24109420221447	1.53243390554056	-4.07266778661685	4.64776954368287e-05	0.00104921347596707	1	143.5	FFPE-ATAC in FFPE kidney
peak_108561	chr8	72095366	72095708	8.47159566349151	-6.24109420221447	1.53243390554056	-4.07266778661685	4.64776954368287e-05	0.00104921347596707	0	102	FFPE-ATAC in FFPE kidney
peak_111747	chr8	126125399	126125705	8.47159566349151	-6.24109420221447	1.53243390554056	-4.07266778661685	4.64776954368287e-05	0.00104921347596707	0.5	90	FFPE-ATAC in FFPE kidney
peak_112322	chr8_random	702462	702849	8.47159566349151	-6.24109420221447	1.53243390554056	-4.07266778661685	4.64776954368287e-05	0.00104921347596707	0	116.5	FFPE-ATAC in FFPE kidney
peak_118698	chrUn_random	4262215	4262713	8.47159566349151	-6.24109420221447	1.53243390554056	-4.07266778661685	4.64776954368287e-05	0.00104921347596707	1	149.5	FFPE-ATAC in FFPE kidney
peak_118721	chrUn_random	4750769	4751102	8.47159566349151	-6.24109420221447	1.53243390554056	-4.07266778661685	4.64776954368287e-05	0.00104921347596707	0	98.5	FFPE-ATAC in FFPE kidney
peak_40129	chr15	38471020	38471537	8.48085902059449	-6.24217951841744	1.53305526907608	-4.07172503453146	4.66662478549447e-05	0.00105210232830833	0	154.5	FFPE-ATAC in FFPE kidney
peak_101165	chr7	71620465	71620791	8.48085902059449	-6.24217951841744	1.53305526907608	-4.07172503453146	4.66662478549447e-05	0.00105210232830833	0	96	FFPE-ATAC in FFPE kidney
peak_121472	chrX	166610996	166611216	8.48085902059449	-6.24217951841744	1.53305526907608	-4.07172503453146	4.66662478549447e-05	0.00105210232830833	0	64.5	FFPE-ATAC in FFPE kidney
peak_84883	chr5	15031406	15031606	8.46850787779052	-6.24073152968937	1.53296489575438	-4.07102050867138	4.68076278355379e-05	0.00105411679699876	0	59	FFPE-ATAC in FFPE kidney
peak_106626	chr8	19767000	19767295	8.46850787779052	-6.24073152968937	1.53296489575438	-4.07102050867138	4.68076278355379e-05	0.00105411679699876	0	88.5	FFPE-ATAC in FFPE kidney
peak_111749	chr8	126135540	126135934	8.46850787779052	-6.24073152968937	1.53296489575438	-4.07102050867138	4.68076278355379e-05	0.00105411679699876	0	118	FFPE-ATAC in FFPE kidney
peak_115651	chr9	70692112	70692322	8.46850787779052	-6.24073152968937	1.53296489575438	-4.07102050867138	4.68076278355379e-05	0.00105411679699876	0	63	FFPE-ATAC in FFPE kidney
peak_35193	chr14	36610881	36611251	8.48394680629549	-6.24254619879772	1.53400680591374	-4.0694383980124	4.71265977362224e-05	0.00105953351714558	1	108	FFPE-ATAC in FFPE kidney
peak_111046	chr8	118512677	118513098	8.48394680629549	-6.24254619879772	1.53400680591374	-4.0694383980124	4.71265977362224e-05	0.00105953351714558	0	123	FFPE-ATAC in FFPE kidney
peak_121489	chrY	1900691	1901053	8.48394680629549	-6.24254619879772	1.53400680591374	-4.0694383980124	4.71265977362224e-05	0.00105953351714558	0	105	FFPE-ATAC in FFPE kidney
peak_121460	chrX	166432624	166433008	13.2220474481296	-3.7525315552774	0.922588492488174	-4.06739471154362	4.75416774361309e-05	0.00106768085642819	6	165.5	FFPE-ATAC in FFPE kidney
peak_42447	chr15	85575161	85575373	13.528229880711	-3.33789128911984	0.822659040182189	-4.05744193655323	4.96131463987373e-05	0.00110887525810188	5	91	FFPE-ATAC in FFPE kidney
peak_112344	chr8_random	819531	819927	13.7260655106962	-4.42894085166452	1.09182988402779	-4.05643856836567	4.98266599442514e-05	0.00111282897105695	4.5	182.5	FFPE-ATAC in FFPE kidney
peak_46491	chr16	50030439	50031001	13.7353288677992	-4.42961046455608	1.09306838996056	-4.05245500212107	5.06829742646883e-05	0.00112842950247483	5.5	252.5	FFPE-ATAC in FFPE kidney
peak_7945	chr1	192770919	192771166	8.27444916468128	-6.20687515397979	1.53485825669113	-4.04394029671552	5.25603088971235e-05	0.00115952216309078	0	70.5	FFPE-ATAC in FFPE kidney
peak_31970	chr13	97342141	97342556	8.27444916468128	-6.20687515397979	1.53485825669113	-4.04394029671552	5.25603088971235e-05	0.00115952216309078	1	120.5	FFPE-ATAC in FFPE kidney
peak_50177	chr17	33425723	33427041	8.27444916468128	-6.20687515397979	1.53485825669113	-4.04394029671552	5.25603088971235e-05	0.00115952216309078	0	382.5	FFPE-ATAC in FFPE kidney
peak_74774	chr3	109830765	109831524	8.27444916468128	-6.20687515397979	1.53485825669113	-4.04394029671552	5.25603088971235e-05	0.00115952216309078	1.5	215.5	FFPE-ATAC in FFPE kidney
peak_79450	chr4	79650766	79651113	8.27444916468128	-6.20687515397979	1.53485825669113	-4.04394029671552	5.25603088971235e-05	0.00115952216309078	1	99.5	FFPE-ATAC in FFPE kidney
peak_100354	chr7	39208704	39209070	8.27444916468128	-6.20687515397979	1.53485825669113	-4.04394029671552	5.25603088971235e-05	0.00115952216309078	0	104	FFPE-ATAC in FFPE kidney
peak_100441	chr7	48332218	48332437	8.27444916468128	-6.20687515397979	1.53485825669113	-4.04394029671552	5.25603088971235e-05	0.00115952216309078	0	63	FFPE-ATAC in FFPE kidney
peak_111746	chr8	126124797	126125265	8.27444916468128	-6.20687515397979	1.53485825669113	-4.04394029671552	5.25603088971235e-05	0.00115952216309078	1.5	135	FFPE-ATAC in FFPE kidney
peak_111752	chr8	126147435	126147801	8.27444916468128	-6.20687515397979	1.53485825669113	-4.04394029671552	5.25603088971235e-05	0.00115952216309078	0	105	FFPE-ATAC in FFPE kidney
peak_118817	chrUn_random	5872435	5873877	8.27444916468128	-6.20687515397979	1.53485825669113	-4.04394029671552	5.25603088971235e-05	0.00115952216309078	2	419	FFPE-ATAC in FFPE kidney
peak_50176	chr17	33391566	33392915	8.27136137898028	-6.2065048001052	1.53483594502723	-4.0437577841553	5.26012619111625e-05	0.00115952216309078	0	393	FFPE-ATAC in FFPE kidney
peak_74054	chr3	98314458	98314982	8.27136137898028	-6.2065048001052	1.53483594502723	-4.0437577841553	5.26012619111625e-05	0.00115952216309078	0	154	FFPE-ATAC in FFPE kidney
peak_105114	chr7	140680730	140680977	8.27136137898028	-6.2065048001052	1.53483594502723	-4.0437577841553	5.26012619111625e-05	0.00115952216309078	0	72.5	FFPE-ATAC in FFPE kidney
peak_106676	chr8	20036704	20037183	8.27136137898028	-6.2065048001052	1.53483594502723	-4.0437577841553	5.26012619111625e-05	0.00115952216309078	1	140	FFPE-ATAC in FFPE kidney
peak_108547	chr8	72000617	72000855	8.27136137898028	-6.2065048001052	1.53483594502723	-4.0437577841553	5.26012619111625e-05	0.00115952216309078	0	69.5	FFPE-ATAC in FFPE kidney
peak_118769	chrUn_random	5262706	5263462	8.27136137898028	-6.2065048001052	1.53483594502723	-4.0437577841553	5.26012619111625e-05	0.00115952216309078	0	221	FFPE-ATAC in FFPE kidney
peak_8095	chr1	193935532	193935845	8.27753695038227	-6.20724655871712	1.53526807350715	-4.04310274266131	5.27484923008205e-05	0.00115997064364272	0	90.5	FFPE-ATAC in FFPE kidney
peak_10893	chr10	61181132	61181335	8.27753695038227	-6.20724655871712	1.53526807350715	-4.04310274266131	5.27484923008205e-05	0.00115997064364272	0.5	57	FFPE-ATAC in FFPE kidney
peak_31900	chr13	96276682	96277223	8.27753695038227	-6.20724655871712	1.53526807350715	-4.04310274266131	5.27484923008205e-05	0.00115997064364272	0	156	FFPE-ATAC in FFPE kidney
peak_46944	chr16	69619508	69620247	8.27753695038227	-6.20724655871712	1.53526807350715	-4.04310274266131	5.27484923008205e-05	0.00115997064364272	1	213.5	FFPE-ATAC in FFPE kidney
peak_71100	chr3	30782469	30783617	8.27753695038227	-6.20724655871712	1.53526807350715	-4.04310274266131	5.27484923008205e-05	0.00115997064364272	3.5	326	FFPE-ATAC in FFPE kidney
peak_74831	chr3	115609253	115610520	8.27753695038227	-6.20724655871712	1.53526807350715	-4.04310274266131	5.27484923008205e-05	0.00115997064364272	4	369.5	FFPE-ATAC in FFPE kidney
peak_76600	chr3	151977600	151978322	8.27753695038227	-6.20724655871712	1.53526807350715	-4.04310274266131	5.27484923008205e-05	0.00115997064364272	1	210	FFPE-ATAC in FFPE kidney
peak_86008	chr5	37051967	37052398	8.27753695038227	-6.20724655871712	1.53526807350715	-4.04310274266131	5.27484923008205e-05	0.00115997064364272	0	122	FFPE-ATAC in FFPE kidney
peak_94995	chr6	79768117	79768489	8.27753695038227	-6.20724655871712	1.53526807350715	-4.04310274266131	5.27484923008205e-05	0.00115997064364272	1	105	FFPE-ATAC in FFPE kidney
peak_118678	chrUn_random	4070889	4071234	8.27753695038227	-6.20724655871712	1.53526807350715	-4.04310274266131	5.27484923008205e-05	0.00115997064364272	0	100	FFPE-ATAC in FFPE kidney
peak_118756	chrUn_random	5187520	5188188	8.27753695038227	-6.20724655871712	1.53526807350715	-4.04310274266131	5.27484923008205e-05	0.00115997064364272	2.5	194.5	FFPE-ATAC in FFPE kidney
peak_79857	chr4	88445992	88446429	8.26827359327929	-6.20613366205196	1.5352012414083	-4.04255383245968	5.28721687282222e-05	0.00116121993121547	0	127.5	FFPE-ATAC in FFPE kidney
peak_23161	chr12	16252571	16252947	8.28062473608326	-6.20762083269319	1.53606958706777	-4.04123672843691	5.31700505954228e-05	0.00116691894395775	0.5	106.5	FFPE-ATAC in FFPE kidney
peak_47434	chr16	87509993	87510648	8.28371252178426	-6.20799975806496	1.53727138445455	-4.03832389052612	5.38344875385036e-05	0.00117946059074215	0	189.5	FFPE-ATAC in FFPE kidney
peak_29863	chr13	48951962	48952583	13.0187253779174	-3.72857029393679	0.923732093176299	-4.03641956523986	5.42731209664038e-05	0.00118684253951428	11	262	FFPE-ATAC in FFPE kidney
peak_84889	chr5	15052621	15053151	13.0218131636184	-3.72880740027607	0.923900435056952	-4.03594073429158	5.4383944215369e-05	0.00118905212133042	10.5	225	FFPE-ATAC in FFPE kidney
peak_106675	chr8	20032880	20033160	13.0156375922164	-3.72833396755615	0.923818251555001	-4.0357873004571	5.4419501113809e-05	0.00118959054552971	4	119.5	FFPE-ATAC in FFPE kidney
peak_79666	chr4	84320769	84321277	9.74373056051051	3.91533995072465	0.970897801194928	4.03270039947136	5.5139558721917e-05	0.00120297654638749	82	10.5	standard ATAC in FFPE kidney
peak_37752	chr14	99863867	99864414	19.4890043175998	-5.97727305759445	1.48284828093609	-4.03094041004731	5.55541284100153e-05	0.00121071747329421	3	365	FFPE-ATAC in FFPE kidney
peak_42545	chr15	87454260	87455086	10.4531323576871	3.22583902049724	0.803516784934452	4.01465044785641	5.95339594347776e-05	0.00128697493986715	133.5	31.5	standard ATAC in FFPE kidney
peak_2268	chr1	65162343	65162933	8.07112709446906	-6.17106617848763	1.53747620485915	-4.01376369857572	5.97581726584913e-05	0.00128939341516806	0	170	FFPE-ATAC in FFPE kidney
peak_33447	chr13_random	326347	327007	8.07112709446906	-6.17106617848763	1.53747620485915	-4.01376369857572	5.97581726584913e-05	0.00128939341516806	0	188	FFPE-ATAC in FFPE kidney
peak_43357	chr15	100167543	100167893	8.07112709446906	-6.17106617848763	1.53747620485915	-4.01376369857572	5.97581726584913e-05	0.00128939341516806	1	98	FFPE-ATAC in FFPE kidney
peak_43730	chr16	3115471	3115889	8.07112709446906	-6.17106617848763	1.53747620485915	-4.01376369857572	5.97581726584913e-05	0.00128939341516806	1	119.5	FFPE-ATAC in FFPE kidney
peak_94940	chr6	73405157	73405828	8.07112709446906	-6.17106617848763	1.53747620485915	-4.01376369857572	5.97581726584913e-05	0.00128939341516806	2	186.5	FFPE-ATAC in FFPE kidney
peak_100445	chr7	48366600	48366976	8.07112709446906	-6.17106617848763	1.53747620485915	-4.01376369857572	5.97581726584913e-05	0.00128939341516806	1	107.5	FFPE-ATAC in FFPE kidney
peak_108546	chr8	71998472	71999082	8.07112709446906	-6.17106617848763	1.53747620485915	-4.01376369857572	5.97581726584913e-05	0.00128939341516806	2	171	FFPE-ATAC in FFPE kidney
peak_111739	chr8	126091326	126091803	8.07112709446906	-6.17106617848763	1.53747620485915	-4.01376369857572	5.97581726584913e-05	0.00128939341516806	0	135	FFPE-ATAC in FFPE kidney
peak_7963	chr1	192944695	192945057	8.07421488017005	-6.17144680414749	1.53770155777274	-4.01342300328188	5.9844529386528e-05	0.00129034061198012	0	102	FFPE-ATAC in FFPE kidney
peak_24506	chr12	58796790	58797098	8.07421488017005	-6.17144680414749	1.53770155777274	-4.01342300328188	5.9844529386528e-05	0.00129034061198012	0	87.5	FFPE-ATAC in FFPE kidney
peak_58553	chr19	24585828	24586725	8.07421488017005	-6.17144680414749	1.53770155777274	-4.01342300328188	5.9844529386528e-05	0.00129034061198012	0	248.5	FFPE-ATAC in FFPE kidney
peak_83454	chr4	141801358	141801845	8.07421488017005	-6.17144680414749	1.53770155777274	-4.01342300328188	5.9844529386528e-05	0.00129034061198012	1.5	137.5	FFPE-ATAC in FFPE kidney
peak_7463	chr1	183949805	183950551	9.84350313717863	4.54790475278942	1.13320530157391	4.01331051529042	5.98730678860299e-05	0.00129072701267908	121	12	standard ATAC in FFPE kidney
peak_84864	chr5	14972042	14972468	8.06803930876806	-6.17068568348931	1.53765875277072	-4.01303974134073	5.99418168045653e-05	0.00129129310969877	0	120.5	FFPE-ATAC in FFPE kidney
peak_84886	chr5	15042644	15043130	8.06803930876806	-6.17068568348931	1.53765875277072	-4.01303974134073	5.99418168045653e-05	0.00129129310969877	0	141	FFPE-ATAC in FFPE kidney
peak_111741	chr8	126105061	126105365	8.06803930876806	-6.17068568348931	1.53765875277072	-4.01303974134073	5.99418168045653e-05	0.00129129310969877	0	87	FFPE-ATAC in FFPE kidney
peak_118674	chrUn_random	4056516	4056743	8.06803930876806	-6.17068568348931	1.53765875277072	-4.01303974134073	5.99418168045653e-05	0.00129129310969877	0	65	FFPE-ATAC in FFPE kidney
peak_56027	chr18	64633725	64634057	8.07730266587104	-6.17182947609237	1.53833702319828	-4.01201387148624	6.02029616123614e-05	0.00129577068439184	1	94	FFPE-ATAC in FFPE kidney
peak_71002	chr3	29226065	29226652	8.07730266587104	-6.17182947609237	1.53833702319828	-4.01201387148624	6.02029616123614e-05	0.00129577068439184	0	165	FFPE-ATAC in FFPE kidney
peak_106616	chr8	19736787	19737038	8.07730266587104	-6.17182947609237	1.53833702319828	-4.01201387148624	6.02029616123614e-05	0.00129577068439184	0	70	FFPE-ATAC in FFPE kidney
peak_30975	chr13	66815051	66815563	8.06495152306707	-6.17030339769167	1.53825166850765	-4.0112444042904	6.03995433771586e-05	0.00129885195314009	1.5	147	FFPE-ATAC in FFPE kidney
peak_79845	chr4	88425526	88426051	8.06495152306707	-6.17030339769167	1.53825166850765	-4.0112444042904	6.03995433771586e-05	0.00129885195314009	0	150	FFPE-ATAC in FFPE kidney
peak_106604	chr8	19681026	19681422	8.06495152306707	-6.17030339769167	1.53825166850765	-4.0112444042904	6.03995433771586e-05	0.00129885195314009	0	112.5	FFPE-ATAC in FFPE kidney
peak_111738	chr8	126079641	126079922	8.06495152306707	-6.17030339769167	1.53825166850765	-4.0112444042904	6.03995433771586e-05	0.00129885195314009	0	81	FFPE-ATAC in FFPE kidney
peak_111740	chr8	126098214	126098526	8.06495152306707	-6.17030339769167	1.53825166850765	-4.0112444042904	6.03995433771586e-05	0.00129885195314009	0	88.5	FFPE-ATAC in FFPE kidney
peak_87791	chr5	89315523	89316125	10.9509596979331	3.00840371246715	0.75001330806838	4.01113377603276	6.04278563619491e-05	0.00129923097466996	105.5	24.5	standard ATAC in FFPE kidney
peak_92910	chr6	29697611	29699112	19.0792723914744	-5.94625837804338	1.48267787232292	-4.01048568204998	6.05939750581309e-05	0.00130188158076469	7.5	978	FFPE-ATAC in FFPE kidney
peak_26250	chr12	100188222	100188799	8.08039045157204	-6.1722160817141	1.53938954454194	-4.00952189366123	6.08418120099137e-05	0.00130629562922055	1	158	FFPE-ATAC in FFPE kidney
peak_82718	chr4	135340134	135340472	8.08039045157204	-6.1722160817141	1.53938954454194	-4.00952189366123	6.08418120099137e-05	0.00130629562922055	0	95.5	FFPE-ATAC in FFPE kidney
peak_3630	chr1	92861082	92861447	13.3255969416737	-4.38408415276956	1.09387017030957	-4.00786516696845	6.12700815665665e-05	0.0013133902654837	5	160	FFPE-ATAC in FFPE kidney
peak_80883	chr4	108027317	108027947	13.3255969416737	-4.38408415276956	1.09387017030957	-4.00786516696845	6.12700815665665e-05	0.0013133902654837	7.5	280.5	FFPE-ATAC in FFPE kidney
peak_116964	chr9	100999565	101000274	13.3286847273747	-4.38431367589425	1.09430407463602	-4.006485745155	6.16288428673103e-05	0.00132014954261175	6.5	311.5	FFPE-ATAC in FFPE kidney
peak_10751	chr10	59549185	59549576	8.08347823727303	-6.17260846883247	1.54087100299606	-4.00592162279029	6.17761325581946e-05	0.00132307149018752	1	108	FFPE-ATAC in FFPE kidney
peak_17823	chr11	62371353	62371559	13.8399139044379	-3.01568440042608	0.755000568879155	-3.99428096445417	6.48908780307173e-05	0.00138247365876728	6	89	FFPE-ATAC in FFPE kidney
peak_112317	chr8_random	676704	677341	13.1243365358593	-3.28922481043658	0.823957797229272	-3.99198213973734	6.55233087624645e-05	0.00139472518059889	12	264.5	FFPE-ATAC in FFPE kidney
peak_34489	chr14	26309734	26310052	13.8402508945661	-3.01624785433007	0.755989635227963	-3.98980053928986	6.61288811350983e-05	0.00140613806302381	9	135.5	FFPE-ATAC in FFPE kidney
peak_21199	chr11	105511936	105512161	13.1246735259875	-3.2898155146337	0.825284011108237	-3.98628286790139	6.711649106138e-05	0.00142439754179218	5.5	94.5	FFPE-ATAC in FFPE kidney
peak_112994	chr9	24346311	24346748	13.1253626571625	-4.36112188589325	1.09504346758802	-3.98260161808845	6.81649638828165e-05	0.00144284895937711	5	191.5	FFPE-ATAC in FFPE kidney
peak_8335	chr10	3715599	3716091	7.87089280995782	-6.13473590661444	1.54041627268609	-3.98251824223919	6.81888890475378e-05	0.00144284895937711	0	133.5	FFPE-ATAC in FFPE kidney
peak_45884	chr16	35942335	35942791	7.87089280995782	-6.13473590661444	1.54041627268609	-3.98251824223919	6.81888890475378e-05	0.00144284895937711	1	124	FFPE-ATAC in FFPE kidney
peak_48199	chr17	3027029	3027258	7.87089280995782	-6.13473590661444	1.54041627268609	-3.98251824223919	6.81888890475378e-05	0.00144284895937711	0	63	FFPE-ATAC in FFPE kidney
peak_111222	chr8	121368544	121369058	7.87089280995782	-6.13473590661444	1.54041627268609	-3.98251824223919	6.81888890475378e-05	0.00144284895937711	0.5	142.5	FFPE-ATAC in FFPE kidney
peak_117317	chr9	106728593	106728793	7.87089280995782	-6.13473590661444	1.54041627268609	-3.98251824223919	6.81888890475378e-05	0.00144284895937711	0	55.5	FFPE-ATAC in FFPE kidney
peak_118757	chrUn_random	5240144	5240524	7.87089280995782	-6.13473590661444	1.54041627268609	-3.98251824223919	6.81888890475378e-05	0.00144284895937711	0	105	FFPE-ATAC in FFPE kidney
peak_118786	chrUn_random	5473894	5475864	7.87089280995782	-6.13473590661444	1.54041627268609	-3.98251824223919	6.81888890475378e-05	0.00144284895937711	1	549	FFPE-ATAC in FFPE kidney
peak_49002	chr17	15103449	15103866	7.86780502425683	-6.13434501096314	1.54039643896643	-3.98231575702626	6.82470263928331e-05	0.00144284895937711	0	114	FFPE-ATAC in FFPE kidney
peak_74055	chr3	98315215	98316173	7.86780502425683	-6.13434501096314	1.54039643896643	-3.98231575702626	6.82470263928331e-05	0.00144284895937711	0	271	FFPE-ATAC in FFPE kidney
peak_86687	chr5	54381796	54382134	7.86780502425683	-6.13434501096314	1.54039643896643	-3.98231575702626	6.82470263928331e-05	0.00144284895937711	1	95	FFPE-ATAC in FFPE kidney
peak_101166	chr7	71628444	71628752	7.86780502425683	-6.13434501096314	1.54039643896643	-3.98231575702626	6.82470263928331e-05	0.00144284895937711	0	86.5	FFPE-ATAC in FFPE kidney
peak_108548	chr8	72001732	72001971	7.86780502425683	-6.13434501096314	1.54039643896643	-3.98231575702626	6.82470263928331e-05	0.00144284895937711	0	66	FFPE-ATAC in FFPE kidney
peak_118767	chrUn_random	5255624	5255987	7.86780502425683	-6.13434501096314	1.54039643896643	-3.98231575702626	6.82470263928331e-05	0.00144284895937711	0	100.5	FFPE-ATAC in FFPE kidney
peak_27845	chr13	8450269	8450792	7.87398059565882	-6.13512793294594	1.54086730373951	-3.98160692880995	6.84509140977451e-05	0.00144539984738202	0	143	FFPE-ATAC in FFPE kidney
peak_32249	chr13	100572688	100573337	7.87398059565882	-6.13512793294594	1.54086730373951	-3.98160692880995	6.84509140977451e-05	0.00144539984738202	1	176	FFPE-ATAC in FFPE kidney
peak_48201	chr17	3033773	3034126	7.87398059565882	-6.13512793294594	1.54086730373951	-3.98160692880995	6.84509140977451e-05	0.00144539984738202	0	96	FFPE-ATAC in FFPE kidney
peak_52153	chr17	73423579	73423787	7.87398059565882	-6.13512793294594	1.54086730373951	-3.98160692880995	6.84509140977451e-05	0.00144539984738202	0	57	FFPE-ATAC in FFPE kidney
peak_109439	chr8	87147543	87147914	7.87398059565882	-6.13512793294594	1.54086730373951	-3.98160692880995	6.84509140977451e-05	0.00144539984738202	0	101.5	FFPE-ATAC in FFPE kidney
peak_117012	chr9	102548046	102548497	7.87398059565882	-6.13512793294594	1.54086730373951	-3.98160692880995	6.84509140977451e-05	0.00144539984738202	1	122	FFPE-ATAC in FFPE kidney
peak_79842	chr4	88422034	88422390	7.86471723855584	-6.13395323300661	1.54080796163251	-3.9809978827651	6.86265606245043e-05	0.00144835403051341	0	98	FFPE-ATAC in FFPE kidney
peak_79852	chr4	88437219	88437736	7.86471723855584	-6.13395323300661	1.54080796163251	-3.9809978827651	6.86265606245043e-05	0.00144835403051341	0	143.5	FFPE-ATAC in FFPE kidney
peak_118760	chrUn_random	5241775	5242134	7.86471723855584	-6.13395323300661	1.54080796163251	-3.9809978827651	6.86265606245043e-05	0.00144835403051341	0	100	FFPE-ATAC in FFPE kidney
peak_19831	chr11	88942913	88943476	13.1284504428635	-4.36135594451135	1.09559338021156	-3.98081626202339	6.86790218357611e-05	0.00144920961819866	4.5	243.5	FFPE-ATAC in FFPE kidney
peak_40043	chr15	37471297	37472465	7.87706838135981	-6.13552308532923	1.54175450553713	-3.97957201570925	6.90394445135209e-05	0.00145605673713422	0	315	FFPE-ATAC in FFPE kidney
peak_111745	chr8	126120285	126120524	7.86162945285484	-6.13355856475577	1.54165614210466	-3.97855163498539	6.93363545425006e-05	0.00146155793369248	0	67	FFPE-ATAC in FFPE kidney
peak_112350	chr8_random	847432	847681	7.86162945285484	-6.13355856475577	1.54165614210466	-3.97855163498539	6.93363545425006e-05	0.00146155793369248	0	69	FFPE-ATAC in FFPE kidney
peak_106674	chr8	20032324	20032617	13.1312012384363	-4.36098231401032	1.09627446067038	-3.97800228908327	6.94967028900892e-05	0.0014646839788715	3	127	FFPE-ATAC in FFPE kidney
peak_118795	chrUn_random	5552405	5552669	18.4689691907095	-5.89839495666828	1.48297989606179	-3.97739374102919	6.96747412952294e-05	0.0014681817040758	1	167.5	FFPE-ATAC in FFPE kidney
peak_84874	chr5	14996771	14997072	12.9220405869503	-4.33755194115978	1.09587267777818	-3.95808019409147	7.5554592703886e-05	0.00157596405412752	2	129	FFPE-ATAC in FFPE kidney
peak_84900	chr5	15134118	15134373	12.9210144656471	-3.2644436389829	0.825277985853186	-3.95556854168123	7.63528527254464e-05	0.00159179526474295	5	105	FFPE-ATAC in FFPE kidney
peak_82257	chr4	131476422	131476862	9.44029892350196	3.86769794548023	0.978794920051528	3.95148959832833	7.76662485133426e-05	0.00161391792038906	68.5	9	standard ATAC in FFPE kidney
peak_14392	chr10	120412175	120412577	7.6675707397456	-6.09706589938829	1.54348689573621	-3.95018961044052	7.80893061351746e-05	0.00162021648933544	1	107.5	FFPE-ATAC in FFPE kidney
peak_60567	chr19	57026118	57026327	7.6675707397456	-6.09706589938829	1.54348689573621	-3.95018961044052	7.80893061351746e-05	0.00162021648933544	0	56	FFPE-ATAC in FFPE kidney
peak_104050	chr7	123580727	123581017	7.6675707397456	-6.09706589938829	1.54348689573621	-3.95018961044052	7.80893061351746e-05	0.00162021648933544	1	76.5	FFPE-ATAC in FFPE kidney
peak_106921	chr8	26376719	26377626	7.6675707397456	-6.09706589938829	1.54348689573621	-3.95018961044052	7.80893061351746e-05	0.00162021648933544	2.5	238.5	FFPE-ATAC in FFPE kidney
peak_112346	chr8_random	829359	830006	7.6675707397456	-6.09706589938829	1.54348689573621	-3.95018961044052	7.80893061351746e-05	0.00162021648933544	0	171	FFPE-ATAC in FFPE kidney
peak_118759	chrUn_random	5241313	5241676	7.6675707397456	-6.09706589938829	1.54348689573621	-3.95018961044052	7.80893061351746e-05	0.00162021648933544	1	98.5	FFPE-ATAC in FFPE kidney
peak_27319	chr12	115252555	115252912	7.6706585254466	-6.09746841589633	1.54373205167258	-3.9498230339196	7.82089950886646e-05	0.00162159274756241	1	94.5	FFPE-ATAC in FFPE kidney
peak_48694	chr17	11594801	11595274	7.6706585254466	-6.09746841589633	1.54373205167258	-3.9498230339196	7.82089950886646e-05	0.00162159274756241	0	125	FFPE-ATAC in FFPE kidney
peak_73318	chr3	88638326	88638548	7.6706585254466	-6.09746841589633	1.54373205167258	-3.9498230339196	7.82089950886646e-05	0.00162159274756241	0	60	FFPE-ATAC in FFPE kidney
peak_100364	chr7	39336357	39336587	7.6706585254466	-6.09746841589633	1.54373205167258	-3.9498230339196	7.82089950886646e-05	0.00162159274756241	0	61.5	FFPE-ATAC in FFPE kidney
peak_106649	chr8	19906697	19907317	7.66448295404461	-6.09666349898769	1.54369732471521	-3.94939046753382	7.83504531243054e-05	0.00162301396246519	0	168	FFPE-ATAC in FFPE kidney
peak_108052	chr8	57997311	57997627	7.66448295404461	-6.09666349898769	1.54369732471521	-3.94939046753382	7.83504531243054e-05	0.00162301396246519	0	85.5	FFPE-ATAC in FFPE kidney
peak_108560	chr8	72087971	72088428	7.66448295404461	-6.09666349898769	1.54369732471521	-3.94939046753382	7.83504531243054e-05	0.00162301396246519	0	120.5	FFPE-ATAC in FFPE kidney
peak_118679	chrUn_random	4074248	4074846	7.66448295404461	-6.09666349898769	1.54369732471521	-3.94939046753382	7.83504531243054e-05	0.00162301396246519	1	162	FFPE-ATAC in FFPE kidney
peak_15524	chr11	11270216	11270615	7.67374631114759	-6.09787315231186	1.54443539504785	-3.94828632642346	7.87126273421903e-05	0.00162842440950069	0	105	FFPE-ATAC in FFPE kidney
peak_63191	chr2	43755790	43756277	7.67374631114759	-6.09787315231186	1.54443539504785	-3.94828632642346	7.87126273421903e-05	0.00162842440950069	1.5	128	FFPE-ATAC in FFPE kidney
peak_71738	chr3	51569845	51570865	7.67374631114759	-6.09787315231186	1.54443539504785	-3.94828632642346	7.87126273421903e-05	0.00162842440950069	4	273.5	FFPE-ATAC in FFPE kidney
peak_84909	chr5	15159052	15159430	7.67374631114759	-6.09787315231186	1.54443539504785	-3.94828632642346	7.87126273421903e-05	0.00162842440950069	0	100.5	FFPE-ATAC in FFPE kidney
peak_96711	chr6	114290886	114292111	7.67374631114759	-6.09787315231186	1.54443539504785	-3.94828632642346	7.87126273421903e-05	0.00162842440950069	2	328	FFPE-ATAC in FFPE kidney
peak_118840	chrX	4247727	4247932	7.66139516834362	-6.09625910494777	1.54436635077643	-3.94741772370452	7.89986532602502e-05	0.00163295226745946	0	55	FFPE-ATAC in FFPE kidney
peak_118841	chrX	4261135	4261436	7.67683409684858	-6.09828218295401	1.54560522459831	-3.94556260932599	7.96128254522291e-05	0.00164397036067178	0	79	FFPE-ATAC in FFPE kidney
peak_33662	chr14	9119033	9119498	12.9275270271773	-3.26553672162227	0.827790490756473	-3.94488310519014	7.98389160581327e-05	0.00164734713048366	9.5	187	FFPE-ATAC in FFPE kidney
peak_31536	chr13	85266157	85267139	17.8651785514748	-5.84957488559703	1.48392562582201	-3.94195961293997	8.08185875050553e-05	0.00166519165618043	6	600.5	FFPE-ATAC in FFPE kidney
peak_84915	chr5	15184084	15184330	12.4176855342555	-3.65432791281022	0.927662110390494	-3.93928766937776	8.17238928821238e-05	0.00168270381340151	3	100	FFPE-ATAC in FFPE kidney
peak_117359	chr9	107432085	107432473	12.4180225243837	-3.65495071851375	0.928079371108286	-3.93818765107246	8.20993782787151e-05	0.0016892905925988	6	156	FFPE-ATAC in FFPE kidney
peak_117262	chr9	106142274	106142514	12.9296038424936	-3.26395840650028	0.82927789212845	-3.93590428188421	8.28840056749837e-05	0.00170098539475811	4.5	98.5	FFPE-ATAC in FFPE kidney
peak_48202	chr17	3077137	3077357	12.4056713815797	-3.65395588069407	0.928478109751869	-3.93542490912421	8.30496287642662e-05	0.00170336512081985	4	90	FFPE-ATAC in FFPE kidney
peak_106629	chr8	19778604	19778824	12.7183815266098	-4.31297234282112	1.09735440161764	-3.93033675944912	8.48269689111597e-05	0.001736595764351	2	93	FFPE-ATAC in FFPE kidney
peak_20406	chr11	97482315	97482632	7.46733645523437	-6.05879913262323	1.54702012548719	-3.91643200550812	8.98691470364091e-05	0.00182165577810897	0	82	FFPE-ATAC in FFPE kidney
peak_21693	chr11	113034844	113035271	7.46733645523437	-6.05879913262323	1.54702012548719	-3.91643200550812	8.98691470364091e-05	0.00182165577810897	1	112.5	FFPE-ATAC in FFPE kidney
peak_24320	chr12	54031734	54032043	7.46733645523437	-6.05879913262323	1.54702012548719	-3.91643200550812	8.98691470364091e-05	0.00182165577810897	0	79	FFPE-ATAC in FFPE kidney
peak_28298	chr13	21901606	21902782	7.46733645523437	-6.05879913262323	1.54702012548719	-3.91643200550812	8.98691470364091e-05	0.00182165577810897	0	302	FFPE-ATAC in FFPE kidney
peak_52996	chr17	86998181	86998414	7.46733645523437	-6.05879913262323	1.54702012548719	-3.91643200550812	8.98691470364091e-05	0.00182165577810897	0	60	FFPE-ATAC in FFPE kidney
peak_102054	chr7	87530092	87530520	7.46733645523437	-6.05879913262323	1.54702012548719	-3.91643200550812	8.98691470364091e-05	0.00182165577810897	1	110.5	FFPE-ATAC in FFPE kidney
peak_118219	chr9	119907443	119907799	7.46733645523437	-6.05879913262323	1.54702012548719	-3.91643200550812	8.98691470364091e-05	0.00182165577810897	1.5	92.5	FFPE-ATAC in FFPE kidney
peak_118711	chrUn_random	4536563	4536835	7.46733645523437	-6.05879913262323	1.54702012548719	-3.91643200550812	8.98691470364091e-05	0.00182165577810897	0	70.5	FFPE-ATAC in FFPE kidney
peak_118742	chrUn_random	5103353	5103583	7.46733645523437	-6.05879913262323	1.54702012548719	-3.91643200550812	8.98691470364091e-05	0.00182165577810897	0	60	FFPE-ATAC in FFPE kidney
peak_118774	chrUn_random	5327269	5328271	7.46733645523437	-6.05879913262323	1.54702012548719	-3.91643200550812	8.98691470364091e-05	0.00182165577810897	2	262	FFPE-ATAC in FFPE kidney
peak_34083	chr14	20920806	20921145	7.46424866953338	-6.05838478047041	1.54700626037771	-3.91619926540648	8.99559050046736e-05	0.00182165577810897	0	88	FFPE-ATAC in FFPE kidney
peak_49004	chr17	15127931	15128854	7.46424866953338	-6.05838478047041	1.54700626037771	-3.91619926540648	8.99559050046736e-05	0.00182165577810897	0	237	FFPE-ATAC in FFPE kidney
peak_49009	chr17	15159554	15160333	7.46424866953338	-6.05838478047041	1.54700626037771	-3.91619926540648	8.99559050046736e-05	0.00182165577810897	0	202.5	FFPE-ATAC in FFPE kidney
peak_53301	chr18	4195305	4196180	7.46424866953338	-6.05838478047041	1.54700626037771	-3.91619926540648	8.99559050046736e-05	0.00182165577810897	0	235	FFPE-ATAC in FFPE kidney
peak_55852	chr18	61634646	61634946	7.46424866953338	-6.05838478047041	1.54700626037771	-3.91619926540648	8.99559050046736e-05	0.00182165577810897	0.5	79	FFPE-ATAC in FFPE kidney
peak_79843	chr4	88422571	88423068	7.46424866953338	-6.05838478047041	1.54700626037771	-3.91619926540648	8.99559050046736e-05	0.00182165577810897	0	129.5	FFPE-ATAC in FFPE kidney
peak_79844	chr4	88425158	88425373	7.46424866953338	-6.05838478047041	1.54700626037771	-3.91619926540648	8.99559050046736e-05	0.00182165577810897	0	56.5	FFPE-ATAC in FFPE kidney
peak_79848	chr4	88430784	88431832	7.46424866953338	-6.05838478047041	1.54700626037771	-3.91619926540648	8.99559050046736e-05	0.00182165577810897	0	276.5	FFPE-ATAC in FFPE kidney
peak_100355	chr7	39209159	39209470	7.46424866953338	-6.05838478047041	1.54700626037771	-3.91619926540648	8.99559050046736e-05	0.00182165577810897	0	83.5	FFPE-ATAC in FFPE kidney
peak_118722	chrUn_random	4754337	4754909	7.46424866953338	-6.05838478047041	1.54700626037771	-3.91619926540648	8.99559050046736e-05	0.00182165577810897	0	150	FFPE-ATAC in FFPE kidney
peak_39617	chr15	31119121	31119886	7.47042424093537	-6.05921469306204	1.54751780351046	-3.9154410238881	9.02391019365019e-05	0.00182495860718831	0	197	FFPE-ATAC in FFPE kidney
peak_45175	chr16	27702208	27702523	7.47042424093537	-6.05921469306204	1.54751780351046	-3.9154410238881	9.02391019365019e-05	0.00182495860718831	0	82	FFPE-ATAC in FFPE kidney
peak_58900	chr19	29756065	29756334	7.47042424093537	-6.05921469306204	1.54751780351046	-3.9154410238881	9.02391019365019e-05	0.00182495860718831	0.5	70.5	FFPE-ATAC in FFPE kidney
peak_84273	chr4	153067252	153067632	7.47042424093537	-6.05921469306204	1.54751780351046	-3.9154410238881	9.02391019365019e-05	0.00182495860718831	1	96.5	FFPE-ATAC in FFPE kidney
peak_89622	chr5	117953667	117953948	7.47042424093537	-6.05921469306204	1.54751780351046	-3.9154410238881	9.02391019365019e-05	0.00182495860718831	0.5	73	FFPE-ATAC in FFPE kidney
peak_110943	chr8	116947919	116948394	7.47042424093537	-6.05921469306204	1.54751780351046	-3.9154410238881	9.02391019365019e-05	0.00182495860718831	0	125	FFPE-ATAC in FFPE kidney
peak_121473	chrX	166612450	166613240	7.47042424093537	-6.05921469306204	1.54751780351046	-3.9154410238881	9.02391019365019e-05	0.00182495860718831	1	203.5	FFPE-ATAC in FFPE kidney
peak_118696	chrUn_random	4259891	4260300	7.46116088383238	-6.05796942576156	1.54747647141941	-3.9147408943833	9.05013421514361e-05	0.00182904491393137	0	106.5	FFPE-ATAC in FFPE kidney
peak_1261	chr1	42077971	42078407	7.47351202663636	-6.05963365445785	1.54850522696328	-3.91321485323054	9.10754321044849e-05	0.0018382025283662	0	111	FFPE-ATAC in FFPE kidney
peak_84053	chr4	150018944	150019361	7.47351202663636	-6.05963365445785	1.54850522696328	-3.91321485323054	9.10754321044849e-05	0.0018382025283662	0	107	FFPE-ATAC in FFPE kidney
peak_117994	chr9	117194955	117195710	7.47351202663636	-6.05963365445785	1.54850522696328	-3.91321485323054	9.10754321044849e-05	0.0018382025283662	1.5	192	FFPE-ATAC in FFPE kidney
peak_84852	chr5	14910767	14911058	7.45807309813139	-6.05755086303685	1.5484372275772	-3.91204160889037	9.15191384858136e-05	0.00184501369003142	0	78	FFPE-ATAC in FFPE kidney
peak_94020	chr6	51663414	51663904	17.2648126880693	-5.79956377509411	1.48559978985315	-3.90385338952384	9.46731445996926e-05	0.00190009016841952	4	287.5	FFPE-ATAC in FFPE kidney
peak_106658	chr8	19935484	19935685	12.7293695579824	-3.23898558400755	0.831058858623231	-3.89742020122786	9.72228427920871e-05	0.00194516090539455	3.5	80	FFPE-ATAC in FFPE kidney
peak_19936	chr11	92182613	92183197	7.26401438502215	-6.01906385784441	1.55109295718779	-3.88053071220005	0.000104228781794087	0.0020650538153176	2	148	FFPE-ATAC in FFPE kidney
peak_70061	chr2	178912343	178913523	7.26401438502215	-6.01906385784441	1.55109295718779	-3.88053071220005	0.000104228781794087	0.0020650538153176	2	292.5	FFPE-ATAC in FFPE kidney
peak_85694	chr5	33081866	33082086	7.26401438502215	-6.01906385784441	1.55109295718779	-3.88053071220005	0.000104228781794087	0.0020650538153176	0	56	FFPE-ATAC in FFPE kidney
peak_108833	chr8	74352642	74353083	7.26401438502215	-6.01906385784441	1.55109295718779	-3.88053071220005	0.000104228781794087	0.0020650538153176	0	112	FFPE-ATAC in FFPE kidney
peak_118753	chrUn_random	5182557	5183439	7.26401438502215	-6.01906385784441	1.55109295718779	-3.88053071220005	0.000104228781794087	0.0020650538153176	1	222	FFPE-ATAC in FFPE kidney
peak_8495	chr10	6899633	6900026	7.26710217072314	-6.01949208258032	1.5513512087659	-3.88016075829073	0.000104387447724052	0.0020650538153176	0	99.5	FFPE-ATAC in FFPE kidney
peak_19973	chr11	93875546	93876296	7.26710217072314	-6.01949208258032	1.5513512087659	-3.88016075829073	0.000104387447724052	0.0020650538153176	2.5	192.5	FFPE-ATAC in FFPE kidney
peak_29727	chr13	46261926	46262495	7.26710217072314	-6.01949208258032	1.5513512087659	-3.88016075829073	0.000104387447724052	0.0020650538153176	0.5	145.5	FFPE-ATAC in FFPE kidney
peak_43544	chr15	101840049	101840261	7.26710217072314	-6.01949208258032	1.5513512087659	-3.88016075829073	0.000104387447724052	0.0020650538153176	0	53	FFPE-ATAC in FFPE kidney
peak_54667	chr18	36832372	36832789	7.26710217072314	-6.01949208258032	1.5513512087659	-3.88016075829073	0.000104387447724052	0.0020650538153176	0	103.5	FFPE-ATAC in FFPE kidney
peak_59474	chr19	39064996	39065939	7.26710217072314	-6.01949208258032	1.5513512087659	-3.88016075829073	0.000104387447724052	0.0020650538153176	1	238.5	FFPE-ATAC in FFPE kidney
peak_66335	chr2	116721278	116721496	7.26710217072314	-6.01949208258032	1.5513512087659	-3.88016075829073	0.000104387447724052	0.0020650538153176	0	55	FFPE-ATAC in FFPE kidney
peak_90294	chr5	125190309	125190990	7.26710217072314	-6.01949208258032	1.5513512087659	-3.88016075829073	0.000104387447724052	0.0020650538153176	0	173.5	FFPE-ATAC in FFPE kidney
peak_93746	chr6	48071133	48071519	7.26710217072314	-6.01949208258032	1.5513512087659	-3.88016075829073	0.000104387447724052	0.0020650538153176	0	98.5	FFPE-ATAC in FFPE kidney
peak_95059	chr6	82975448	82975941	7.26710217072314	-6.01949208258032	1.5513512087659	-3.88016075829073	0.000104387447724052	0.0020650538153176	0	124.5	FFPE-ATAC in FFPE kidney
peak_99063	chr7	6386034	6386672	7.26710217072314	-6.01949208258032	1.5513512087659	-3.88016075829073	0.000104387447724052	0.0020650538153176	0	160.5	FFPE-ATAC in FFPE kidney
peak_118691	chrUn_random	4249085	4249544	7.26710217072314	-6.01949208258032	1.5513512087659	-3.88016075829073	0.000104387447724052	0.0020650538153176	2	116.5	FFPE-ATAC in FFPE kidney
peak_48402	chr17	5849356	5850058	7.26092659932116	-6.01863569439194	1.55134962756465	-3.87961268527208	0.000104622924463837	0.00206702115870662	0	181	FFPE-ATAC in FFPE kidney
peak_61280	chr2	10203590	10203979	7.26092659932116	-6.01863569439194	1.55134962756465	-3.87961268527208	0.000104622924463837	0.00206702115870662	0	100.5	FFPE-ATAC in FFPE kidney
peak_71924	chr3	53305521	53305721	7.26092659932116	-6.01863569439194	1.55134962756465	-3.87961268527208	0.000104622924463837	0.00206702115870662	0	50.5	FFPE-ATAC in FFPE kidney
peak_108545	chr8	71996477	71996860	7.26092659932116	-6.01863569439194	1.55134962756465	-3.87961268527208	0.000104622924463837	0.00206702115870662	0	96	FFPE-ATAC in FFPE kidney
peak_118639	chrUn_random	3557458	3557717	7.26092659932116	-6.01863569439194	1.55134962756465	-3.87961268527208	0.000104622924463837	0.00206702115870662	0.5	67.5	FFPE-ATAC in FFPE kidney
peak_118673	chrUn_random	4055677	4056167	7.26092659932116	-6.01863569439194	1.55134962756465	-3.87961268527208	0.000104622924463837	0.00206702115870662	1	126	FFPE-ATAC in FFPE kidney
peak_118791	chrUn_random	5489045	5489556	7.26092659932116	-6.01863569439194	1.55134962756465	-3.87961268527208	0.000104622924463837	0.00206702115870662	1	128	FFPE-ATAC in FFPE kidney
peak_13490	chr10	98790762	98791364	7.27018995642414	-6.01992267390667	1.55212735478207	-3.87849789217324	0.000105103437227971	0.00207348170126274	2	149.5	FFPE-ATAC in FFPE kidney
peak_31563	chr13	89763247	89763937	7.27018995642414	-6.01992267390667	1.55212735478207	-3.87849789217324	0.000105103437227971	0.00207348170126274	1	173.5	FFPE-ATAC in FFPE kidney
peak_40608	chr15	56700027	56700983	7.27018995642414	-6.01992267390667	1.55212735478207	-3.87849789217324	0.000105103437227971	0.00207348170126274	2.5	242.5	FFPE-ATAC in FFPE kidney
peak_67918	chr2	145748827	145749282	7.27018995642414	-6.01992267390667	1.55212735478207	-3.87849789217324	0.000105103437227971	0.00207348170126274	0.5	115	FFPE-ATAC in FFPE kidney
peak_74783	chr3	110340648	110341045	7.27018995642414	-6.01992267390667	1.55212735478207	-3.87849789217324	0.000105103437227971	0.00207348170126274	0.5	100	FFPE-ATAC in FFPE kidney
peak_114316	chr9	53069521	53069733	7.27018995642414	-6.01992267390667	1.55212735478207	-3.87849789217324	0.000105103437227971	0.00207348170126274	0	53	FFPE-ATAC in FFPE kidney
peak_118839	chrX	4240293	4240631	7.27018995642414	-6.01992267390667	1.55212735478207	-3.87849789217324	0.000105103437227971	0.00207348170126274	0	84	FFPE-ATAC in FFPE kidney
peak_121498	chrY_random	5294800	5295151	7.27018995642414	-6.01992267390667	1.55212735478207	-3.87849789217324	0.000105103437227971	0.00207348170126274	0	86.5	FFPE-ATAC in FFPE kidney
peak_118849	chrX	4763803	4764005	7.25783881362016	-6.01820528190964	1.55212505020058	-3.87739717307694	0.000105579926434491	0.00208089422978407	0	51.5	FFPE-ATAC in FFPE kidney
peak_16925	chr11	49808428	49808669	7.27327774212513	-6.02035790791476	1.55343129862123	-3.87552247290126	0.000106396159244041	0.00209151725458322	0.5	59.5	FFPE-ATAC in FFPE kidney
peak_26203	chr12	96395661	96396977	7.27327774212513	-6.02035790791476	1.55343129862123	-3.87552247290126	0.000106396159244041	0.00209151725458322	0	323	FFPE-ATAC in FFPE kidney
peak_27310	chr12	115219981	115220326	7.27327774212513	-6.02035790791476	1.55343129862123	-3.87552247290126	0.000106396159244041	0.00209151725458322	1	87.5	FFPE-ATAC in FFPE kidney
peak_33428	chr13_random	115531	115756	7.27327774212513	-6.02035790791476	1.55343129862123	-3.87552247290126	0.000106396159244041	0.00209151725458322	0	55	FFPE-ATAC in FFPE kidney
peak_53163	chr17	88619783	88620153	7.27327774212513	-6.02035790791476	1.55343129862123	-3.87552247290126	0.000106396159244041	0.00209151725458322	0.5	93.5	FFPE-ATAC in FFPE kidney
peak_16159	chr11	30161149	30161410	12.0113783839593	-3.6031805638107	0.930791043512955	-3.87109500990869	0.000108347548957062	0.00212335344855978	4.5	101.5	FFPE-ATAC in FFPE kidney
peak_64130	chr2	65966645	65966918	12.0113783839593	-3.6031805638107	0.930791043512955	-3.87109500990869	0.000108347548957062	0.00212335344855978	5.5	107.5	FFPE-ATAC in FFPE kidney
peak_96090	chr6	97402079	97402303	12.017216965233	-3.60305310043706	0.931028394425973	-3.86997122967289	0.000108848197747369	0.00213179028692784	3.5	87	FFPE-ATAC in FFPE kidney
peak_106646	chr8	19891731	19892107	16.6483339159025	-5.74612779393679	1.48577569615477	-3.86742615914902	0.000109990117982513	0.00215068983471549	2	214	FFPE-ATAC in FFPE kidney
peak_103681	chr7	118878971	118879210	7.27945331352712	-6.02125081318046	1.55770408270369	-3.86546512912095	0.000110877690600156	0.00216560661634276	0.5	59	FFPE-ATAC in FFPE kidney
peak_111064	chr8	118796191	118796608	12.1180156632044	-4.23998093628582	1.10107397988433	-3.85076844403429	0.000117747787958846	0.00228510410208001	3.5	164.5	FFPE-ATAC in FFPE kidney
peak_9701	chr10	31328403	31328612	9.83835368707985	3.13014564414677	0.81455707249046	3.84275792312077	0.000121659452952544	0.00235586698585417	32	8	standard ATAC in FFPE kidney
peak_5427	chr1	144974091	144974693	7.06378010051092	-5.97864400131831	1.55636111459602	-3.84142468303069	0.000122322270375122	0.00235586698585417	0	146.5	FFPE-ATAC in FFPE kidney
peak_5443	chr1	145718613	145719086	7.06378010051092	-5.97864400131831	1.55636111459602	-3.84142468303069	0.000122322270375122	0.00235586698585417	0	117	FFPE-ATAC in FFPE kidney
peak_6170	chr1	162596213	162596624	7.06378010051092	-5.97864400131831	1.55636111459602	-3.84142468303069	0.000122322270375122	0.00235586698585417	0	99.5	FFPE-ATAC in FFPE kidney
peak_28301	chr13	21924998	21926079	7.06378010051092	-5.97864400131831	1.55636111459602	-3.84142468303069	0.000122322270375122	0.00235586698585417	0	264.5	FFPE-ATAC in FFPE kidney
peak_33427	chr13_random	114378	115068	7.06378010051092	-5.97864400131831	1.55636111459602	-3.84142468303069	0.000122322270375122	0.00235586698585417	0	171.5	FFPE-ATAC in FFPE kidney
peak_33680	chr14	9191699	9192780	7.06378010051092	-5.97864400131831	1.55636111459602	-3.84142468303069	0.000122322270375122	0.00235586698585417	2.5	270	FFPE-ATAC in FFPE kidney
peak_39991	chr15	36906470	36906781	7.06378010051092	-5.97864400131831	1.55636111459602	-3.84142468303069	0.000122322270375122	0.00235586698585417	0	76.5	FFPE-ATAC in FFPE kidney
peak_40369	chr15	47371414	47371792	7.06378010051092	-5.97864400131831	1.55636111459602	-3.84142468303069	0.000122322270375122	0.00235586698585417	0	92	FFPE-ATAC in FFPE kidney
peak_46647	chr16	55854677	55855156	7.06378010051092	-5.97864400131831	1.55636111459602	-3.84142468303069	0.000122322270375122	0.00235586698585417	0	119.5	FFPE-ATAC in FFPE kidney
peak_48406	chr17	5890640	5890981	7.06378010051092	-5.97864400131831	1.55636111459602	-3.84142468303069	0.000122322270375122	0.00235586698585417	0	83.5	FFPE-ATAC in FFPE kidney
peak_63495	chr2	51794178	51794392	7.06378010051092	-5.97864400131831	1.55636111459602	-3.84142468303069	0.000122322270375122	0.00235586698585417	0	52.5	FFPE-ATAC in FFPE kidney
peak_77563	chr4	31157099	31157613	7.06378010051092	-5.97864400131831	1.55636111459602	-3.84142468303069	0.000122322270375122	0.00235586698585417	0	128	FFPE-ATAC in FFPE kidney
peak_78974	chr4	60188597	60188821	7.06378010051092	-5.97864400131831	1.55636111459602	-3.84142468303069	0.000122322270375122	0.00235586698585417	0	56	FFPE-ATAC in FFPE kidney
peak_79006	chr4	60924154	60924584	7.06378010051092	-5.97864400131831	1.55636111459602	-3.84142468303069	0.000122322270375122	0.00235586698585417	1	107.5	FFPE-ATAC in FFPE kidney
peak_84913	chr5	15177923	15178273	7.06378010051092	-5.97864400131831	1.55636111459602	-3.84142468303069	0.000122322270375122	0.00235586698585417	0	88	FFPE-ATAC in FFPE kidney
peak_98179	chr6	139531854	139532157	7.06378010051092	-5.97864400131831	1.55636111459602	-3.84142468303069	0.000122322270375122	0.00235586698585417	0	75.5	FFPE-ATAC in FFPE kidney
peak_98570	chr6	145131924	145132253	7.06378010051092	-5.97864400131831	1.55636111459602	-3.84142468303069	0.000122322270375122	0.00235586698585417	1	80	FFPE-ATAC in FFPE kidney
peak_100377	chr7	46580065	46580279	7.06378010051092	-5.97864400131831	1.55636111459602	-3.84142468303069	0.000122322270375122	0.00235586698585417	0	53	FFPE-ATAC in FFPE kidney
peak_100442	chr7	48333516	48333749	7.06378010051092	-5.97864400131831	1.55636111459602	-3.84142468303069	0.000122322270375122	0.00235586698585417	0	58.5	FFPE-ATAC in FFPE kidney
peak_106650	chr8	19907994	19908971	7.06378010051092	-5.97864400131831	1.55636111459602	-3.84142468303069	0.000122322270375122	0.00235586698585417	3	237.5	FFPE-ATAC in FFPE kidney
peak_109099	chr8	81559120	81559615	7.06378010051092	-5.97864400131831	1.55636111459602	-3.84142468303069	0.000122322270375122	0.00235586698585417	1	119.5	FFPE-ATAC in FFPE kidney
peak_112957	chr9	22516176	22516882	7.06378010051092	-5.97864400131831	1.55636111459602	-3.84142468303069	0.000122322270375122	0.00235586698585417	3	174.5	FFPE-ATAC in FFPE kidney
peak_113065	chr9	26926476	26926817	7.06378010051092	-5.97864400131831	1.55636111459602	-3.84142468303069	0.000122322270375122	0.00235586698585417	0.5	85.5	FFPE-ATAC in FFPE kidney
peak_115949	chr9	75769792	75770134	7.06378010051092	-5.97864400131831	1.55636111459602	-3.84142468303069	0.000122322270375122	0.00235586698585417	0	82.5	FFPE-ATAC in FFPE kidney
peak_118744	chrUn_random	5161725	5162519	7.06378010051092	-5.97864400131831	1.55636111459602	-3.84142468303069	0.000122322270375122	0.00235586698585417	0	194.5	FFPE-ATAC in FFPE kidney
peak_121544	chrY_random	39577302	39577651	7.06378010051092	-5.97864400131831	1.55636111459602	-3.84142468303069	0.000122322270375122	0.00235586698585417	0	86	FFPE-ATAC in FFPE kidney
peak_49006	chr17	15135028	15135521	7.06069231480993	-5.97820058107343	1.55637329001905	-3.8411097256753	0.000122479347097811	0.00235586698585417	0	122	FFPE-ATAC in FFPE kidney
peak_79841	chr4	88419026	88420289	7.06069231480993	-5.97820058107343	1.55637329001905	-3.8411097256753	0.000122479347097811	0.00235586698585417	0	317	FFPE-ATAC in FFPE kidney
peak_103387	chr7	113423129	113423979	7.06069231480993	-5.97820058107343	1.55637329001905	-3.8411097256753	0.000122479347097811	0.00235586698585417	0	212.5	FFPE-ATAC in FFPE kidney
peak_106603	chr8	19679641	19680099	7.06069231480993	-5.97820058107343	1.55637329001905	-3.8411097256753	0.000122479347097811	0.00235586698585417	0	114	FFPE-ATAC in FFPE kidney
peak_112828	chr9	21095509	21096348	7.06069231480993	-5.97820058107343	1.55637329001905	-3.8411097256753	0.000122479347097811	0.00235586698585417	0	206.5	FFPE-ATAC in FFPE kidney
peak_118567	chr9	123839596	123840566	7.06069231480993	-5.97820058107343	1.55637329001905	-3.8411097256753	0.000122479347097811	0.00235586698585417	0	243.5	FFPE-ATAC in FFPE kidney
peak_118740	chrUn_random	5101876	5102419	7.06069231480993	-5.97820058107343	1.55637329001905	-3.8411097256753	0.000122479347097811	0.00235586698585417	2	135.5	FFPE-ATAC in FFPE kidney
peak_100291	chr7	37482175	37483375	9.33502475568827	3.40120215779269	0.885496291614112	3.84101231140434	0.000122527968401225	0.00235642935464745	183	29.5	standard ATAC in FFPE kidney
peak_7828	chr1	190833599	190834015	7.06686788621191	-5.97908864029574	1.55690173032707	-3.84037638588767	0.000122845818238845	0.00235657709458529	1	102	FFPE-ATAC in FFPE kidney
peak_33146	chr13	113616230	113616574	7.06686788621191	-5.97908864029574	1.55690173032707	-3.84037638588767	0.000122845818238845	0.00235657709458529	0	84	FFPE-ATAC in FFPE kidney
peak_48020	chr16	95725467	95725834	7.06686788621191	-5.97908864029574	1.55690173032707	-3.84037638588767	0.000122845818238845	0.00235657709458529	0	88.5	FFPE-ATAC in FFPE kidney
peak_51258	chr17	50240033	50240498	7.06686788621191	-5.97908864029574	1.55690173032707	-3.84037638588767	0.000122845818238845	0.00235657709458529	1	111	FFPE-ATAC in FFPE kidney
peak_54274	chr18	28316681	28317184	7.06686788621191	-5.97908864029574	1.55690173032707	-3.84037638588767	0.000122845818238845	0.00235657709458529	1	125	FFPE-ATAC in FFPE kidney
peak_58495	chr19	23431792	23432135	7.06686788621191	-5.97908864029574	1.55690173032707	-3.84037638588767	0.000122845818238845	0.00235657709458529	0	84	FFPE-ATAC in FFPE kidney
peak_60907	chr1_random	1029504	1029911	7.06686788621191	-5.97908864029574	1.55690173032707	-3.84037638588767	0.000122845818238845	0.00235657709458529	0	98	FFPE-ATAC in FFPE kidney
peak_77628	chr4	32443636	32444121	7.06686788621191	-5.97908864029574	1.55690173032707	-3.84037638588767	0.000122845818238845	0.00235657709458529	2.5	119.5	FFPE-ATAC in FFPE kidney
peak_87349	chr5	74090251	74090749	7.06686788621191	-5.97908864029574	1.55690173032707	-3.84037638588767	0.000122845818238845	0.00235657709458529	0	123.5	FFPE-ATAC in FFPE kidney
peak_95005	chr6	81652680	81653155	7.06686788621191	-5.97908864029574	1.55690173032707	-3.84037638588767	0.000122845818238845	0.00235657709458529	0	117	FFPE-ATAC in FFPE kidney
peak_95989	chr6	94846838	94847449	7.06686788621191	-5.97908864029574	1.55690173032707	-3.84037638588767	0.000122845818238845	0.00235657709458529	2	150	FFPE-ATAC in FFPE kidney
peak_101164	chr7	71613162	71613522	7.06686788621191	-5.97908864029574	1.55690173032707	-3.84037638588767	0.000122845818238845	0.00235657709458529	0	87.5	FFPE-ATAC in FFPE kidney
peak_111271	chr8	122176336	122176818	7.06686788621191	-5.97908864029574	1.55690173032707	-3.84037638588767	0.000122845818238845	0.00235657709458529	1.5	120	FFPE-ATAC in FFPE kidney
peak_48488	chr17	7174959	7175210	7.05760452910893	-5.97775597877659	1.55693885960694	-3.83942885225803	0.00012332085909243	0.00236159056627476	0	63	FFPE-ATAC in FFPE kidney
peak_54952	chr18	40741835	40742278	7.05760452910893	-5.97775597877659	1.55693885960694	-3.83942885225803	0.00012332085909243	0.00236159056627476	1	113.5	FFPE-ATAC in FFPE kidney
peak_65212	chr2	89510596	89511042	7.05760452910893	-5.97775597877659	1.55693885960694	-3.83942885225803	0.00012332085909243	0.00236159056627476	0	114	FFPE-ATAC in FFPE kidney
peak_79007	chr4	60925867	60926524	7.05760452910893	-5.97775597877659	1.55693885960694	-3.83942885225803	0.00012332085909243	0.00236159056627476	0	163	FFPE-ATAC in FFPE kidney
peak_79855	chr4	88442490	88443571	7.05760452910893	-5.97775597877659	1.55693885960694	-3.83942885225803	0.00012332085909243	0.00236159056627476	0	267	FFPE-ATAC in FFPE kidney
peak_79858	chr4	88448381	88449475	7.05760452910893	-5.97775597877659	1.55693885960694	-3.83942885225803	0.00012332085909243	0.00236159056627476	3.5	268.5	FFPE-ATAC in FFPE kidney
peak_22243	chr11	118217852	118218199	7.06995567191291	-5.97953688198646	1.55800207450966	-3.83795181008881	0.000124064821330544	0.00237394134124704	0.5	86	FFPE-ATAC in FFPE kidney
peak_40825	chr15	59264547	59264914	7.06995567191291	-5.97953688198646	1.55800207450966	-3.83795181008881	0.000124064821330544	0.00237394134124704	0	89.5	FFPE-ATAC in FFPE kidney
peak_46601	chr16	54444314	54444736	7.06995567191291	-5.97953688198646	1.55800207450966	-3.83795181008881	0.000124064821330544	0.00237394134124704	0.5	102	FFPE-ATAC in FFPE kidney
peak_84904	chr5	15143023	15143282	7.05451674340794	-5.97730780084677	1.55806597345099	-3.83636373728611	0.000124869426725522	0.00238600379220591	0	65.5	FFPE-ATAC in FFPE kidney
peak_93180	chr6	34063221	34063444	7.05451674340794	-5.97730780084677	1.55806597345099	-3.83636373728611	0.000124869426725522	0.00238600379220591	0.5	56.5	FFPE-ATAC in FFPE kidney
peak_94619	chr6	66982531	66982918	12.3230624076862	-3.18783692167566	0.831235631084938	-3.83505807795422	0.000125534627721302	0.00239661281723967	8.5	151	FFPE-ATAC in FFPE kidney
peak_43736	chr16	3232643	3232987	7.0730434576139	-5.9799910778898	1.55967697438537	-3.83412153676653	0.000126013827906453	0.00240407171619899	1	83.5	FFPE-ATAC in FFPE kidney
peak_53269	chr18	3006228	3006507	16.041792481095	-5.69193396241304	1.48695084101895	-3.82792342920535	0.000129228943139021	0.00245884915381938	1	155	FFPE-ATAC in FFPE kidney
peak_89410	chr5	115416933	115417167	11.8231582521238	-3.57724636891819	0.934972938153074	-3.82604268310119	0.000130219720771821	0.00247460217850643	4	88	FFPE-ATAC in FFPE kidney
peak_106670	chr8	20005683	20006261	11.8992546644872	-4.21304867161937	1.10261295972818	-3.82096785136462	0.000132928981071541	0.00251782154175456	6	231	FFPE-ATAC in FFPE kidney
peak_42341	chr15	84684138	84684557	8.82894502872392	3.76317740260074	0.987541757635142	3.81065142157875	0.000138601085598335	0.00261223292553116	59.5	10	standard ATAC in FFPE kidney
peak_99696	chr7	27564923	27565174	12.1139017562002	-3.16134977041444	0.831559812970458	-3.80171061793092	0.000143700508356602	0.00269663609105618	5	95.5	FFPE-ATAC in FFPE kidney
peak_59084	chr19	32680117	32680402	12.1108139704992	-3.16109109621311	0.831683178461606	-3.80083567646552	0.000144208915491357	0.00270229899707355	5.5	110.5	FFPE-ATAC in FFPE kidney
peak_15761	chr11	20090288	20090675	6.8604580302987	-5.93660262634535	1.56251702626904	-3.7993842796841	0.000145056024048111	0.00270444034682111	0	90.5	FFPE-ATAC in FFPE kidney
peak_29306	chr13	41564217	41564536	6.8604580302987	-5.93660262634535	1.56251702626904	-3.7993842796841	0.000145056024048111	0.00270444034682111	0	77	FFPE-ATAC in FFPE kidney
peak_30441	chr13	56795743	56796262	6.8604580302987	-5.93660262634535	1.56251702626904	-3.7993842796841	0.000145056024048111	0.00270444034682111	1.5	123.5	FFPE-ATAC in FFPE kidney
peak_31728	chr13	94162467	94162963	6.8604580302987	-5.93660262634535	1.56251702626904	-3.7993842796841	0.000145056024048111	0.00270444034682111	1	117.5	FFPE-ATAC in FFPE kidney
peak_32400	chr13	102822649	102823651	6.8604580302987	-5.93660262634535	1.56251702626904	-3.7993842796841	0.000145056024048111	0.00270444034682111	0	241.5	FFPE-ATAC in FFPE kidney
peak_46972	chr16	72352960	72353345	6.8604580302987	-5.93660262634535	1.56251702626904	-3.7993842796841	0.000145056024048111	0.00270444034682111	1	91.5	FFPE-ATAC in FFPE kidney
peak_47445	chr16	87600361	87601175	6.8604580302987	-5.93660262634535	1.56251702626904	-3.7993842796841	0.000145056024048111	0.00270444034682111	3.5	197	FFPE-ATAC in FFPE kidney
peak_53262	chr17_random	332158	332358	6.8604580302987	-5.93660262634535	1.56251702626904	-3.7993842796841	0.000145056024048111	0.00270444034682111	0	48.5	FFPE-ATAC in FFPE kidney
peak_55799	chr18	61293712	61294053	6.8604580302987	-5.93660262634535	1.56251702626904	-3.7993842796841	0.000145056024048111	0.00270444034682111	1	82.5	FFPE-ATAC in FFPE kidney
peak_69842	chr2	172904007	172904452	6.8604580302987	-5.93660262634535	1.56251702626904	-3.7993842796841	0.000145056024048111	0.00270444034682111	1	105.5	FFPE-ATAC in FFPE kidney
peak_70909	chr3	27431728	27431928	6.8604580302987	-5.93660262634535	1.56251702626904	-3.7993842796841	0.000145056024048111	0.00270444034682111	0.5	48	FFPE-ATAC in FFPE kidney
peak_71942	chr3	53487145	53487800	6.8604580302987	-5.93660262634535	1.56251702626904	-3.7993842796841	0.000145056024048111	0.00270444034682111	0	160	FFPE-ATAC in FFPE kidney
peak_108921	chr8	75843427	75843778	6.8604580302987	-5.93660262634535	1.56251702626904	-3.7993842796841	0.000145056024048111	0.00270444034682111	0	86	FFPE-ATAC in FFPE kidney
peak_110124	chr8	98153864	98154234	6.8604580302987	-5.93660262634535	1.56251702626904	-3.7993842796841	0.000145056024048111	0.00270444034682111	0	90	FFPE-ATAC in FFPE kidney
peak_118802	chrUn_random	5588732	5588955	6.8604580302987	-5.93660262634535	1.56251702626904	-3.7993842796841	0.000145056024048111	0.00270444034682111	0	53.5	FFPE-ATAC in FFPE kidney
peak_118831	chrUn_random	5899450	5900390	6.8604580302987	-5.93660262634535	1.56251702626904	-3.7993842796841	0.000145056024048111	0.00270444034682111	1	230	FFPE-ATAC in FFPE kidney
peak_121471	chrX	166579777	166581046	6.8604580302987	-5.93660262634535	1.56251702626904	-3.7993842796841	0.000145056024048111	0.00270444034682111	0	304	FFPE-ATAC in FFPE kidney
peak_106628	chr8	19773866	19774302	11.6105728248086	-3.5493551167227	0.934206584250033	-3.7993257343311	0.000145090292200207	0.00270444034682111	6	162.5	FFPE-ATAC in FFPE kidney
peak_3623	chr1	92810252	92810680	6.86354581599969	-5.93706368290585	1.56279092659709	-3.79901340727231	0.000145273234384702	0.00270444034682111	0	100	FFPE-ATAC in FFPE kidney
peak_14224	chr10	117653238	117653460	6.86354581599969	-5.93706368290585	1.56279092659709	-3.79901340727231	0.000145273234384702	0.00270444034682111	0	53.5	FFPE-ATAC in FFPE kidney
peak_17484	chr11	58564807	58565160	6.86354581599969	-5.93706368290585	1.56279092659709	-3.79901340727231	0.000145273234384702	0.00270444034682111	0	84	FFPE-ATAC in FFPE kidney
peak_24977	chr12	74843231	74843502	6.86354581599969	-5.93706368290585	1.56279092659709	-3.79901340727231	0.000145273234384702	0.00270444034682111	0	66	FFPE-ATAC in FFPE kidney
peak_28370	chr13	23702664	23703398	6.86354581599969	-5.93706368290585	1.56279092659709	-3.79901340727231	0.000145273234384702	0.00270444034682111	1	176	FFPE-ATAC in FFPE kidney
peak_33444	chr13_random	308180	308862	6.86354581599969	-5.93706368290585	1.56279092659709	-3.79901340727231	0.000145273234384702	0.00270444034682111	0	160.5	FFPE-ATAC in FFPE kidney
peak_42786	chr15	93064762	93065089	6.86354581599969	-5.93706368290585	1.56279092659709	-3.79901340727231	0.000145273234384702	0.00270444034682111	1	78	FFPE-ATAC in FFPE kidney
peak_43931	chr16	5619278	5619478	6.86354581599969	-5.93706368290585	1.56279092659709	-3.79901340727231	0.000145273234384702	0.00270444034682111	0	48.5	FFPE-ATAC in FFPE kidney
peak_48070	chr16	96335592	96335964	6.86354581599969	-5.93706368290585	1.56279092659709	-3.79901340727231	0.000145273234384702	0.00270444034682111	1	87	FFPE-ATAC in FFPE kidney
peak_48401	chr17	5843220	5843430	6.86354581599969	-5.93706368290585	1.56279092659709	-3.79901340727231	0.000145273234384702	0.00270444034682111	0	49.5	FFPE-ATAC in FFPE kidney
peak_61343	chr2	11383350	11383845	6.86354581599969	-5.93706368290585	1.56279092659709	-3.79901340727231	0.000145273234384702	0.00270444034682111	2	116.5	FFPE-ATAC in FFPE kidney
peak_88579	chr5	103900548	103901601	6.86354581599969	-5.93706368290585	1.56279092659709	-3.79901340727231	0.000145273234384702	0.00270444034682111	1	254	FFPE-ATAC in FFPE kidney
peak_92312	chr6	8823658	8824583	6.86354581599969	-5.93706368290585	1.56279092659709	-3.79901340727231	0.000145273234384702	0.00270444034682111	2	220	FFPE-ATAC in FFPE kidney
peak_97576	chr6	127418432	127419074	6.86354581599969	-5.93706368290585	1.56279092659709	-3.79901340727231	0.000145273234384702	0.00270444034682111	0	154	FFPE-ATAC in FFPE kidney
peak_98976	chr7	4706928	4707721	6.86354581599969	-5.93706368290585	1.56279092659709	-3.79901340727231	0.000145273234384702	0.00270444034682111	0	185	FFPE-ATAC in FFPE kidney
peak_107626	chr8	43370803	43371160	6.86354581599969	-5.93706368290585	1.56279092659709	-3.79901340727231	0.000145273234384702	0.00270444034682111	0	84	FFPE-ATAC in FFPE kidney
peak_117889	chr9	115890443	115890828	6.86354581599969	-5.93706368290585	1.56279092659709	-3.79901340727231	0.000145273234384702	0.00270444034682111	1	92.5	FFPE-ATAC in FFPE kidney
peak_121523	chrY_random	21905266	21905483	6.86354581599969	-5.93706368290585	1.56279092659709	-3.79901340727231	0.000145273234384702	0.00270444034682111	0	51	FFPE-ATAC in FFPE kidney
peak_43194	chr15	98768069	98768610	15.6505872691755	-5.65524371726648	1.48872842258334	-3.79870742808358	0.000145452668990992	0.00270675470214411	4	286.5	FFPE-ATAC in FFPE kidney
peak_3150	chr1	85253752	85254061	6.8573702445977	-5.93614155160999	1.5628382437652	-3.79830835039499	0.000145687012735093	0.00270675470214411	0	74	FFPE-ATAC in FFPE kidney
peak_24412	chr12	56255465	56256982	6.8573702445977	-5.93614155160999	1.5628382437652	-3.79830835039499	0.000145687012735093	0.00270675470214411	0	372.5	FFPE-ATAC in FFPE kidney
peak_45872	chr16	35820963	35821468	6.8573702445977	-5.93614155160999	1.5628382437652	-3.79830835039499	0.000145687012735093	0.00270675470214411	1	122.5	FFPE-ATAC in FFPE kidney
peak_47529	chr16	90189390	90189682	6.8573702445977	-5.93614155160999	1.5628382437652	-3.79830835039499	0.000145687012735093	0.00270675470214411	0	70	FFPE-ATAC in FFPE kidney
peak_48494	chr17	7199756	7200095	6.8573702445977	-5.93614155160999	1.5628382437652	-3.79830835039499	0.000145687012735093	0.00270675470214411	1	82	FFPE-ATAC in FFPE kidney
peak_49011	chr17	15166403	15166922	6.8573702445977	-5.93614155160999	1.5628382437652	-3.79830835039499	0.000145687012735093	0.00270675470214411	0	126.5	FFPE-ATAC in FFPE kidney
peak_53259	chr17_random	309092	309708	6.8573702445977	-5.93614155160999	1.5628382437652	-3.79830835039499	0.000145687012735093	0.00270675470214411	0	146.5	FFPE-ATAC in FFPE kidney
peak_60910	chr1_random	1080456	1080786	6.8573702445977	-5.93614155160999	1.5628382437652	-3.79830835039499	0.000145687012735093	0.00270675470214411	0	80.5	FFPE-ATAC in FFPE kidney
peak_84879	chr5	15007746	15008392	6.8573702445977	-5.93614155160999	1.5628382437652	-3.79830835039499	0.000145687012735093	0.00270675470214411	0.5	156.5	FFPE-ATAC in FFPE kidney
peak_103305	chr7	111576388	111576736	6.8573702445977	-5.93614155160999	1.5628382437652	-3.79830835039499	0.000145687012735093	0.00270675470214411	0	85.5	FFPE-ATAC in FFPE kidney
peak_118626	chrUn_random	2970599	2971075	6.8573702445977	-5.93614155160999	1.5628382437652	-3.79830835039499	0.000145687012735093	0.00270675470214411	0	116	FFPE-ATAC in FFPE kidney
peak_121470	chrX	166578709	166579264	6.8573702445977	-5.93614155160999	1.5628382437652	-3.79830835039499	0.000145687012735093	0.00270675470214411	0	133.5	FFPE-ATAC in FFPE kidney
peak_8621	chr10	9301007	9301396	6.86663360170068	-5.93752719964346	1.56366332498194	-3.797190293321	0.000146345445473378	0.00271235519645156	1	93.5	FFPE-ATAC in FFPE kidney
peak_11260	chr10	67719542	67719742	6.86663360170068	-5.93752719964346	1.56366332498194	-3.797190293321	0.000146345445473378	0.00271235519645156	0	48.5	FFPE-ATAC in FFPE kidney
peak_22806	chr12	7262240	7262617	6.86663360170068	-5.93752719964346	1.56366332498194	-3.797190293321	0.000146345445473378	0.00271235519645156	0	90	FFPE-ATAC in FFPE kidney
peak_23564	chr12	28065801	28066114	6.86663360170068	-5.93752719964346	1.56366332498194	-3.797190293321	0.000146345445473378	0.00271235519645156	0	74	FFPE-ATAC in FFPE kidney
peak_24615	chr12	69871699	69872138	6.86663360170068	-5.93752719964346	1.56366332498194	-3.797190293321	0.000146345445473378	0.00271235519645156	0	103	FFPE-ATAC in FFPE kidney
peak_24630	chr12	70377009	70377812	6.86663360170068	-5.93752719964346	1.56366332498194	-3.797190293321	0.000146345445473378	0.00271235519645156	1	189.5	FFPE-ATAC in FFPE kidney
peak_31696	chr13	93259050	93259623	6.86663360170068	-5.93752719964346	1.56366332498194	-3.797190293321	0.000146345445473378	0.00271235519645156	0	135	FFPE-ATAC in FFPE kidney
peak_35196	chr14	36743891	36744230	6.86663360170068	-5.93752719964346	1.56366332498194	-3.797190293321	0.000146345445473378	0.00271235519645156	0	80	FFPE-ATAC in FFPE kidney
peak_37802	chr14	100665420	100665644	6.86663360170068	-5.93752719964346	1.56366332498194	-3.797190293321	0.000146345445473378	0.00271235519645156	0.5	53	FFPE-ATAC in FFPE kidney
peak_51890	chr17	68264261	68264616	6.86663360170068	-5.93752719964346	1.56366332498194	-3.797190293321	0.000146345445473378	0.00271235519645156	0	85	FFPE-ATAC in FFPE kidney
peak_53223	chr17	90992518	90993525	6.86663360170068	-5.93752719964346	1.56366332498194	-3.797190293321	0.000146345445473378	0.00271235519645156	3	238	FFPE-ATAC in FFPE kidney
peak_71464	chr3	39437849	39438074	6.86663360170068	-5.93752719964346	1.56366332498194	-3.797190293321	0.000146345445473378	0.00271235519645156	0	53.5	FFPE-ATAC in FFPE kidney
peak_84665	chr5	4913301	4913686	6.86663360170068	-5.93752719964346	1.56366332498194	-3.797190293321	0.000146345445473378	0.00271235519645156	0	92	FFPE-ATAC in FFPE kidney
peak_100452	chr7	48485513	48486149	6.86663360170068	-5.93752719964346	1.56366332498194	-3.797190293321	0.000146345445473378	0.00271235519645156	1	151	FFPE-ATAC in FFPE kidney
peak_118676	chrUn_random	4062704	4064280	11.7082837370789	-4.18795145909999	1.10310828960065	-3.79650075933718	0.000146752913391218	0.00271866369452758	18.5	609.5	FFPE-ATAC in FFPE kidney
peak_33429	chr13_random	123949	124164	6.85428245889671	-5.93567797706396	1.56375949590283	-3.79577421759287	0.000147183406039462	0.002725392775595	0	52	FFPE-ATAC in FFPE kidney
peak_84924	chr5	15216283	15216576	6.85428245889671	-5.93567797706396	1.56375949590283	-3.79577421759287	0.000147183406039462	0.002725392775595	0	71.5	FFPE-ATAC in FFPE kidney
peak_35693	chr14	49656113	49656505	6.86972138740168	-5.93799562781719	1.56514610846958	-3.79389220960555	0.000148304074816814	0.00274321919522689	1	91	FFPE-ATAC in FFPE kidney
peak_51823	chr17	67191351	67191856	6.86972138740168	-5.93799562781719	1.56514610846958	-3.79389220960555	0.000148304074816814	0.00274321919522689	1.5	115.5	FFPE-ATAC in FFPE kidney
peak_106609	chr8	19699508	19699714	15.4345770660311	-5.6348896983437	1.48824777472636	-3.78625776838792	0.000152933033426306	0.00281598777271061	1	111	FFPE-ATAC in FFPE kidney
peak_94836	chr6	72455239	72455678	15.2377675573491	-5.61618600437721	1.48873672934185	-3.77245075887933	0.00016165187610241	0.00295815876358775	5	230.5	FFPE-ATAC in FFPE kidney
peak_64258	chr2	69193452	69193870	15.2466939243239	-5.61641413142674	1.48918977824186	-3.77145627339552	0.000162297600839369	0.00296729516445135	3	216.5	FFPE-ATAC in FFPE kidney
peak_84882	chr5	15024207	15024521	11.5080494525677	-4.1616141522606	1.10481413567967	-3.76680024074855	0.000165353199909426	0.00301816762669511	3	121	FFPE-ATAC in FFPE kidney
peak_84896	chr5	15119672	15120071	11.4987860954647	-4.16081954876494	1.10512112756454	-3.76503484096311	0.000166525860701427	0.00303820347145555	5.5	152	FFPE-ATAC in FFPE kidney
peak_95432	chr6	87407137	87408104	11.5142250239697	-4.16214852085317	1.10594882349123	-3.76341873371157	0.000167606209588624	0.0030551628823559	8	365	FFPE-ATAC in FFPE kidney
peak_23179	chr12	16638949	16639444	11.4044999590236	-3.52214228543864	0.93622879983094	-3.76205291492277	0.000168524380802157	0.003070058118962	9	183	FFPE-ATAC in FFPE kidney
peak_92392	chr6	13014448	13014927	11.9136674716889	-3.13451433962483	0.833443255083269	-3.76092111911285	0.000169288812899018	0.00308167494028994	9.5	178	FFPE-ATAC in FFPE kidney
peak_97406	chr6	124877761	124877989	11.9074919002869	-3.13398719659077	0.833704325141215	-3.75911111659392	0.000170518098702772	0.00310265860660137	5	85	FFPE-ATAC in FFPE kidney
peak_13845	chr10	110558379	110558981	11.4137633161266	-3.52296846868623	0.937845978944703	-3.75644673835505	0.000172342929552411	0.0031325801268106	11.5	216	FFPE-ATAC in FFPE kidney
peak_15157	chr11	4459947	4460695	6.66022374578747	-5.8937743071744	1.56970104060149	-3.75471134612741	0.000173541359178812	0.00314032752484834	1	173	FFPE-ATAC in FFPE kidney
peak_24768	chr12	71932860	71933359	6.66022374578747	-5.8937743071744	1.56970104060149	-3.75471134612741	0.000173541359178812	0.00314032752484834	2	115	FFPE-ATAC in FFPE kidney
peak_26923	chr12	110493724	110494180	6.66022374578747	-5.8937743071744	1.56970104060149	-3.75471134612741	0.000173541359178812	0.00314032752484834	0	105.5	FFPE-ATAC in FFPE kidney
peak_48305	chr17	5019534	5020017	6.66022374578747	-5.8937743071744	1.56970104060149	-3.75471134612741	0.000173541359178812	0.00314032752484834	1	110	FFPE-ATAC in FFPE kidney
peak_51277	chr17	50484903	50485644	6.66022374578747	-5.8937743071744	1.56970104060149	-3.75471134612741	0.000173541359178812	0.00314032752484834	0	169	FFPE-ATAC in FFPE kidney
peak_52523	chr17	80802912	80803523	6.66022374578747	-5.8937743071744	1.56970104060149	-3.75471134612741	0.000173541359178812	0.00314032752484834	1	140.5	FFPE-ATAC in FFPE kidney
peak_53865	chr18	15072081	15072709	6.66022374578747	-5.8937743071744	1.56970104060149	-3.75471134612741	0.000173541359178812	0.00314032752484834	2	145	FFPE-ATAC in FFPE kidney
peak_55330	chr18	51482208	51482543	6.66022374578747	-5.8937743071744	1.56970104060149	-3.75471134612741	0.000173541359178812	0.00314032752484834	0	78.5	FFPE-ATAC in FFPE kidney
peak_57049	chr18	81552951	81553292	6.66022374578747	-5.8937743071744	1.56970104060149	-3.75471134612741	0.000173541359178812	0.00314032752484834	0	79	FFPE-ATAC in FFPE kidney
peak_60498	chr19	56384806	56385183	6.66022374578747	-5.8937743071744	1.56970104060149	-3.75471134612741	0.000173541359178812	0.00314032752484834	1	85.5	FFPE-ATAC in FFPE kidney
peak_73321	chr3	88670803	88671065	6.66022374578747	-5.8937743071744	1.56970104060149	-3.75471134612741	0.000173541359178812	0.00314032752484834	0.5	60	FFPE-ATAC in FFPE kidney
peak_103376	chr7	113174833	113175870	6.66022374578747	-5.8937743071744	1.56970104060149	-3.75471134612741	0.000173541359178812	0.00314032752484834	0	243.5	FFPE-ATAC in FFPE kidney
peak_105494	chr7	147528316	147529014	6.66022374578747	-5.8937743071744	1.56970104060149	-3.75471134612741	0.000173541359178812	0.00314032752484834	2	163	FFPE-ATAC in FFPE kidney
peak_118719	chrUn_random	4741775	4742251	6.66022374578747	-5.8937743071744	1.56970104060149	-3.75471134612741	0.000173541359178812	0.00314032752484834	0	111	FFPE-ATAC in FFPE kidney
peak_5811	chr1	155900337	155900780	6.65713596008647	-5.89329462055475	1.56973328568899	-3.75432863294865	0.000173806706511834	0.00314032752484834	1	102	FFPE-ATAC in FFPE kidney
peak_8074	chr1	193765967	193766167	6.65713596008647	-5.89329462055475	1.56973328568899	-3.75432863294865	0.000173806706511834	0.00314032752484834	0	47.5	FFPE-ATAC in FFPE kidney
peak_9181	chr10	20614474	20615198	6.65713596008647	-5.89329462055475	1.56973328568899	-3.75432863294865	0.000173806706511834	0.00314032752484834	3.5	173.5	FFPE-ATAC in FFPE kidney
peak_28117	chr13	15800923	15801388	6.65713596008647	-5.89329462055475	1.56973328568899	-3.75432863294865	0.000173806706511834	0.00314032752484834	0	109.5	FFPE-ATAC in FFPE kidney
peak_28299	chr13	21903715	21903947	6.65713596008647	-5.89329462055475	1.56973328568899	-3.75432863294865	0.000173806706511834	0.00314032752484834	0	53	FFPE-ATAC in FFPE kidney
peak_40216	chr15	40002661	40002869	6.65713596008647	-5.89329462055475	1.56973328568899	-3.75432863294865	0.000173806706511834	0.00314032752484834	0.5	48	FFPE-ATAC in FFPE kidney
peak_48540	chr17	8323762	8324154	6.65713596008647	-5.89329462055475	1.56973328568899	-3.75432863294865	0.000173806706511834	0.00314032752484834	0	92.5	FFPE-ATAC in FFPE kidney
peak_66170	chr2	113162811	113163084	6.65713596008647	-5.89329462055475	1.56973328568899	-3.75432863294865	0.000173806706511834	0.00314032752484834	0	63	FFPE-ATAC in FFPE kidney
peak_73583	chr3	93328926	93329374	6.65713596008647	-5.89329462055475	1.56973328568899	-3.75432863294865	0.000173806706511834	0.00314032752484834	1	106	FFPE-ATAC in FFPE kidney
peak_76138	chr3	142851592	142851996	6.65713596008647	-5.89329462055475	1.56973328568899	-3.75432863294865	0.000173806706511834	0.00314032752484834	1	93.5	FFPE-ATAC in FFPE kidney
peak_76700	chr3	153367858	153368541	6.65713596008647	-5.89329462055475	1.56973328568899	-3.75432863294865	0.000173806706511834	0.00314032752484834	1	158	FFPE-ATAC in FFPE kidney
peak_110286	chr8	107390501	107392081	6.65713596008647	-5.89329462055475	1.56973328568899	-3.75432863294865	0.000173806706511834	0.00314032752484834	0	372	FFPE-ATAC in FFPE kidney
peak_110288	chr8	107409928	107411600	6.65713596008647	-5.89329462055475	1.56973328568899	-3.75432863294865	0.000173806706511834	0.00314032752484834	0	399	FFPE-ATAC in FFPE kidney
peak_112264	chr8	130970890	130971231	6.65713596008647	-5.89329462055475	1.56973328568899	-3.75432863294865	0.000173806706511834	0.00314032752484834	0.5	79	FFPE-ATAC in FFPE kidney
peak_118731	chrUn_random	4774108	4774525	6.65713596008647	-5.89329462055475	1.56973328568899	-3.75432863294865	0.000173806706511834	0.00314032752484834	0	96	FFPE-ATAC in FFPE kidney
peak_118852	chrX	4781543	4781991	6.65713596008647	-5.89329462055475	1.56973328568899	-3.75432863294865	0.000173806706511834	0.00314032752484834	1.5	104.5	FFPE-ATAC in FFPE kidney
peak_8622	chr10	9316804	9317281	6.66331153148846	-5.89425522745187	1.57031315907227	-3.75355399233496	0.000174344957925055	0.00314032752484834	0.5	112	FFPE-ATAC in FFPE kidney
peak_21221	chr11	105826302	105826825	6.66331153148846	-5.89425522745187	1.57031315907227	-3.75355399233496	0.000174344957925055	0.00314032752484834	1	120.5	FFPE-ATAC in FFPE kidney
peak_23659	chr12	31104447	31105130	6.66331153148846	-5.89425522745187	1.57031315907227	-3.75355399233496	0.000174344957925055	0.00314032752484834	0	158.5	FFPE-ATAC in FFPE kidney
peak_23902	chr12	35535064	35535657	6.66331153148846	-5.89425522745187	1.57031315907227	-3.75355399233496	0.000174344957925055	0.00314032752484834	1.5	134	FFPE-ATAC in FFPE kidney
peak_32586	chr13	105093308	105093637	6.66331153148846	-5.89425522745187	1.57031315907227	-3.75355399233496	0.000174344957925055	0.00314032752484834	1	77	FFPE-ATAC in FFPE kidney
peak_34734	chr14	29642527	29642884	6.66331153148846	-5.89425522745187	1.57031315907227	-3.75355399233496	0.000174344957925055	0.00314032752484834	0	81.5	FFPE-ATAC in FFPE kidney
peak_57199	chr18	84328148	84328601	6.66331153148846	-5.89425522745187	1.57031315907227	-3.75355399233496	0.000174344957925055	0.00314032752484834	0	106.5	FFPE-ATAC in FFPE kidney
peak_61363	chr2	11560798	11561551	6.66331153148846	-5.89425522745187	1.57031315907227	-3.75355399233496	0.000174344957925055	0.00314032752484834	0	177	FFPE-ATAC in FFPE kidney
peak_75290	chr3	125883642	125884003	6.66331153148846	-5.89425522745187	1.57031315907227	-3.75355399233496	0.000174344957925055	0.00314032752484834	1.5	84	FFPE-ATAC in FFPE kidney
peak_82825	chr4	136036248	136036452	6.66331153148846	-5.89425522745187	1.57031315907227	-3.75355399233496	0.000174344957925055	0.00314032752484834	0	47.5	FFPE-ATAC in FFPE kidney
peak_85391	chr5	25321618	25324389	6.66331153148846	-5.89425522745187	1.57031315907227	-3.75355399233496	0.000174344957925055	0.00314032752484834	11.5	645.5	FFPE-ATAC in FFPE kidney
peak_97566	chr6	127256104	127256616	6.66331153148846	-5.89425522745187	1.57031315907227	-3.75355399233496	0.000174344957925055	0.00314032752484834	0	116.5	FFPE-ATAC in FFPE kidney
peak_98209	chr6	140047326	140047794	6.66331153148846	-5.89425522745187	1.57031315907227	-3.75355399233496	0.000174344957925055	0.00314032752484834	1.5	109	FFPE-ATAC in FFPE kidney
peak_106619	chr8	19743841	19744077	6.66331153148846	-5.89425522745187	1.57031315907227	-3.75355399233496	0.000174344957925055	0.00314032752484834	0	54.5	FFPE-ATAC in FFPE kidney
peak_109383	chr8	86506657	86507235	6.66331153148846	-5.89425522745187	1.57031315907227	-3.75355399233496	0.000174344957925055	0.00314032752484834	2	132	FFPE-ATAC in FFPE kidney
peak_113110	chr9	29513681	29514521	6.66331153148846	-5.89425522745187	1.57031315907227	-3.75355399233496	0.000174344957925055	0.00314032752484834	0	192	FFPE-ATAC in FFPE kidney
peak_114808	chr9	60386836	60387971	6.66331153148846	-5.89425522745187	1.57031315907227	-3.75355399233496	0.000174344957925055	0.00314032752484834	1	265.5	FFPE-ATAC in FFPE kidney
peak_116455	chr9	89062180	89062525	6.66331153148846	-5.89425522745187	1.57031315907227	-3.75355399233496	0.000174344957925055	0.00314032752484834	0	78	FFPE-ATAC in FFPE kidney
peak_119265	chrX	19949884	19950399	6.66331153148846	-5.89425522745187	1.57031315907227	-3.75355399233496	0.000174344957925055	0.00314032752484834	1	122	FFPE-ATAC in FFPE kidney
peak_30211	chr13	53706952	53707810	6.65404817438548	-5.89281360653381	1.5704108028251	-3.75240261715782	0.000175147876962934	0.00315245432560293	1	198.5	FFPE-ATAC in FFPE kidney
peak_118566	chr9	123836121	123836891	6.65404817438548	-5.89281360653381	1.5704108028251	-3.75240261715782	0.000175147876962934	0.00315245432560293	0	182	FFPE-ATAC in FFPE kidney
peak_22858	chr12	8439986	8440681	11.9170922475181	-3.13543132968051	0.835750743840314	-3.75163450680649	0.000175685456117011	0.003159790913953	16	258	FFPE-ATAC in FFPE kidney
peak_118970	chrX	8469408	8470639	9.53250824462672	3.07940956236071	0.820910910034956	3.75121042334494	0.000175982924828411	0.0031646728215741	181	41.5	standard ATAC in FFPE kidney
peak_22929	chr12	9179250	9179603	6.66639931718945	-5.89473992731081	1.57157801407427	-3.75084143104602	0.000176242135729672	0.00316699172030182	1	79.5	FFPE-ATAC in FFPE kidney
peak_25047	chr12	76556713	76556938	6.66639931718945	-5.89473992731081	1.57157801407427	-3.75084143104602	0.000176242135729672	0.00316699172030182	0.5	51.5	FFPE-ATAC in FFPE kidney
peak_67565	chr2	135814222	135814613	6.66639931718945	-5.89473992731081	1.57157801407427	-3.75084143104602	0.000176242135729672	0.00316699172030182	1	88	FFPE-ATAC in FFPE kidney
peak_91787	chr5	148770932	148771460	6.66639931718945	-5.89473992731081	1.57157801407427	-3.75084143104602	0.000176242135729672	0.00316699172030182	0.5	120.5	FFPE-ATAC in FFPE kidney
peak_102958	chr7	106357708	106358132	6.66639931718945	-5.89473992731081	1.57157801407427	-3.75084143104602	0.000176242135729672	0.00316699172030182	0	98.5	FFPE-ATAC in FFPE kidney
peak_27226	chr12	113916818	113917617	9.5352590401995	3.07966848358746	0.821406531138464	3.74926223111358	0.000177355558962096	0.0031846456676024	121.5	26	standard ATAC in FFPE kidney
peak_111325	chr8	122523382	122523748	6.66948710289045	-5.89523085494343	1.57351382415958	-3.74653896548516	0.00017929116460132	0.00321560211472334	0	83	FFPE-ATAC in FFPE kidney
peak_118668	chrUn_random	3921927	3923177	14.8311234169246	-5.57646050128455	1.4896089981827	-3.74357331896339	0.000181421631176913	0.00324781978243846	5	634.5	FFPE-ATAC in FFPE kidney
peak_17521	chr11	59120047	59120774	9.53800983577228	3.0799331365201	0.822862741215386	3.74294883247596	0.000181873274196981	0.00325475547944722	107.5	28.5	standard ATAC in FFPE kidney
peak_118725	chrUn_random	4763248	4763673	14.6367277136872	-5.55641740908128	1.49024177787175	-3.72853418256502	0.000192596787411016	0.003418930470916	2	213	FFPE-ATAC in FFPE kidney
peak_84916	chr5	15184917	15185119	14.6247135610114	-5.55597494508853	1.49021176048481	-3.72831237305562	0.000192766348425802	0.00342144084976408	1	102.5	FFPE-ATAC in FFPE kidney
peak_69872	chr2	173101186	173101555	8.51759799512523	3.70798880065458	0.995462242691348	3.72489145407424	0.00019539928165859	0.00346311682104459	53	7.5	standard ATAC in FFPE kidney
peak_27068	chr12	112671780	112672021	11.2042656745124	-3.49427098190443	0.938412282622238	-3.72359894111814	0.00019640284000221	0.0034783675469156	4	88	FFPE-ATAC in FFPE kidney
peak_65785	chr2	103326664	103327142	11.7165209728787	-3.10744053635952	0.836158207976433	-3.71633084112128	0.000202136864827241	0.00356829072833308	8	171.5	FFPE-ATAC in FFPE kidney
peak_97613	chr6	128076405	128076689	11.7075946059039	-3.10728666416045	0.83653349823788	-3.71447966005643	0.000203622246139732	0.0035915749752946	6.5	104.5	FFPE-ATAC in FFPE kidney
peak_33418	chr13	120283767	120284241	11.7192717684515	-3.10705529741366	0.837191147056847	-3.71128541950848	0.000206209430964047	0.00363299177763962	8	172	FFPE-ATAC in FFPE kidney
peak_43350	chr15	100137271	100137691	11.7192717684515	-3.10705529741366	0.837191147056847	-3.71128541950848	0.000206209430964047	0.00363299177763962	10	153	FFPE-ATAC in FFPE kidney
peak_11722	chr10	74881973	74882244	6.45690167557524	-5.84914091713314	1.57744908719432	-3.70797445357589	0.000208923726888234	0.00366105497844908	0.5	61.5	FFPE-ATAC in FFPE kidney
peak_13914	chr10	111185205	111185876	6.45690167557524	-5.84914091713314	1.57744908719432	-3.70797445357589	0.000208923726888234	0.00366105497844908	1	154.5	FFPE-ATAC in FFPE kidney
peak_16382	chr11	33654789	33655173	6.45690167557524	-5.84914091713314	1.57744908719432	-3.70797445357589	0.000208923726888234	0.00366105497844908	0	85.5	FFPE-ATAC in FFPE kidney
peak_29081	chr13	37726943	37727495	6.45690167557524	-5.84914091713314	1.57744908719432	-3.70797445357589	0.000208923726888234	0.00366105497844908	1.5	123	FFPE-ATAC in FFPE kidney
peak_33445	chr13_random	319631	320085	6.45690167557524	-5.84914091713314	1.57744908719432	-3.70797445357589	0.000208923726888234	0.00366105497844908	0	101	FFPE-ATAC in FFPE kidney
peak_35331	chr14	43551046	43551272	6.45690167557524	-5.84914091713314	1.57744908719432	-3.70797445357589	0.000208923726888234	0.00366105497844908	0	52.5	FFPE-ATAC in FFPE kidney
peak_35349	chr14	44009162	44009384	6.45690167557524	-5.84914091713314	1.57744908719432	-3.70797445357589	0.000208923726888234	0.00366105497844908	0	49	FFPE-ATAC in FFPE kidney
peak_40583	chr15	55707887	55708171	6.45690167557524	-5.84914091713314	1.57744908719432	-3.70797445357589	0.000208923726888234	0.00366105497844908	0	64	FFPE-ATAC in FFPE kidney
peak_47869	chr16	93772462	93773108	6.45690167557524	-5.84914091713314	1.57744908719432	-3.70797445357589	0.000208923726888234	0.00366105497844908	0	145.5	FFPE-ATAC in FFPE kidney
peak_48398	chr17	5819636	5820036	6.45690167557524	-5.84914091713314	1.57744908719432	-3.70797445357589	0.000208923726888234	0.00366105497844908	0	92.5	FFPE-ATAC in FFPE kidney
peak_83886	chr4	149068259	149068463	6.45690167557524	-5.84914091713314	1.57744908719432	-3.70797445357589	0.000208923726888234	0.00366105497844908	0	47	FFPE-ATAC in FFPE kidney
peak_84861	chr5	14962271	14962823	6.45690167557524	-5.84914091713314	1.57744908719432	-3.70797445357589	0.000208923726888234	0.00366105497844908	1.5	123	FFPE-ATAC in FFPE kidney
peak_100385	chr7	46597909	46598131	6.45690167557524	-5.84914091713314	1.57744908719432	-3.70797445357589	0.000208923726888234	0.00366105497844908	0	49.5	FFPE-ATAC in FFPE kidney
peak_101167	chr7	71634987	71635230	6.45690167557524	-5.84914091713314	1.57744908719432	-3.70797445357589	0.000208923726888234	0.00366105497844908	0	56	FFPE-ATAC in FFPE kidney
peak_112541	chr9	13217476	13218052	6.45690167557524	-5.84914091713314	1.57744908719432	-3.70797445357589	0.000208923726888234	0.00366105497844908	2	133	FFPE-ATAC in FFPE kidney
peak_116641	chr9	95666429	95666647	6.45690167557524	-5.84914091713314	1.57744908719432	-3.70797445357589	0.000208923726888234	0.00366105497844908	0	49	FFPE-ATAC in FFPE kidney
peak_118650	chrUn_random	3636103	3636450	6.45690167557524	-5.84914091713314	1.57744908719432	-3.70797445357589	0.000208923726888234	0.00366105497844908	0	79	FFPE-ATAC in FFPE kidney
peak_120971	chrX	147095940	147096221	6.45690167557524	-5.84914091713314	1.57744908719432	-3.70797445357589	0.000208923726888234	0.00366105497844908	0	64	FFPE-ATAC in FFPE kidney
peak_3110	chr1	84493458	84493991	6.45998946127624	-5.84964112248521	1.57776114978017	-3.70755809477261	0.000209267418934772	0.00366105497844908	0	118	FFPE-ATAC in FFPE kidney
peak_7771	chr1	189575697	189576135	6.45998946127624	-5.84964112248521	1.57776114978017	-3.70755809477261	0.000209267418934772	0.00366105497844908	0	99.5	FFPE-ATAC in FFPE kidney
peak_9510	chr10	25584246	25584603	6.45998946127624	-5.84964112248521	1.57776114978017	-3.70755809477261	0.000209267418934772	0.00366105497844908	1	81.5	FFPE-ATAC in FFPE kidney
peak_12604	chr10	84488565	84488992	6.45998946127624	-5.84964112248521	1.57776114978017	-3.70755809477261	0.000209267418934772	0.00366105497844908	0	96.5	FFPE-ATAC in FFPE kidney
peak_14226	chr10	117720127	117720341	6.45998946127624	-5.84964112248521	1.57776114978017	-3.70755809477261	0.000209267418934772	0.00366105497844908	0	47.5	FFPE-ATAC in FFPE kidney
peak_25146	chr12	77290413	77291318	6.45998946127624	-5.84964112248521	1.57776114978017	-3.70755809477261	0.000209267418934772	0.00366105497844908	2	205.5	FFPE-ATAC in FFPE kidney
peak_26445	chr12	103274171	103274761	6.45998946127624	-5.84964112248521	1.57776114978017	-3.70755809477261	0.000209267418934772	0.00366105497844908	0	129	FFPE-ATAC in FFPE kidney
peak_26924	chr12	110550307	110550521	6.45998946127624	-5.84964112248521	1.57776114978017	-3.70755809477261	0.000209267418934772	0.00366105497844908	0	48	FFPE-ATAC in FFPE kidney
peak_30224	chr13	54114984	54115962	6.45998946127624	-5.84964112248521	1.57776114978017	-3.70755809477261	0.000209267418934772	0.00366105497844908	1	221	FFPE-ATAC in FFPE kidney
peak_39036	chr15	8701277	8701760	6.45998946127624	-5.84964112248521	1.57776114978017	-3.70755809477261	0.000209267418934772	0.00366105497844908	1	107.5	FFPE-ATAC in FFPE kidney
peak_40875	chr15	59671465	59672142	6.45998946127624	-5.84964112248521	1.57776114978017	-3.70755809477261	0.000209267418934772	0.00366105497844908	3	152.5	FFPE-ATAC in FFPE kidney
peak_56197	chr18	66375500	66376041	6.45998946127624	-5.84964112248521	1.57776114978017	-3.70755809477261	0.000209267418934772	0.00366105497844908	2	122	FFPE-ATAC in FFPE kidney
peak_62969	chr2	35809189	35809448	6.45998946127624	-5.84964112248521	1.57776114978017	-3.70755809477261	0.000209267418934772	0.00366105497844908	0.5	57.5	FFPE-ATAC in FFPE kidney
peak_72548	chr3	68550143	68550582	6.45998946127624	-5.84964112248521	1.57776114978017	-3.70755809477261	0.000209267418934772	0.00366105497844908	2	98.5	FFPE-ATAC in FFPE kidney
peak_73522	chr3	91341430	91341797	6.45998946127624	-5.84964112248521	1.57776114978017	-3.70755809477261	0.000209267418934772	0.00366105497844908	0	82.5	FFPE-ATAC in FFPE kidney
peak_91911	chr5	150161580	150162328	6.45998946127624	-5.84964112248521	1.57776114978017	-3.70755809477261	0.000209267418934772	0.00366105497844908	2	167	FFPE-ATAC in FFPE kidney
peak_101759	chr7	81576758	81577097	6.45998946127624	-5.84964112248521	1.57776114978017	-3.70755809477261	0.000209267418934772	0.00366105497844908	1	76.5	FFPE-ATAC in FFPE kidney
peak_107628	chr8	43796872	43797227	6.45998946127624	-5.84964112248521	1.57776114978017	-3.70755809477261	0.000209267418934772	0.00366105497844908	0	81	FFPE-ATAC in FFPE kidney
peak_118652	chrUn_random	3650893	3651548	6.45998946127624	-5.84964112248521	1.57776114978017	-3.70755809477261	0.000209267418934772	0.00366105497844908	2	148	FFPE-ATAC in FFPE kidney
peak_120386	chrX	99471090	99471298	6.45998946127624	-5.84964112248521	1.57776114978017	-3.70755809477261	0.000209267418934772	0.00366105497844908	0	46	FFPE-ATAC in FFPE kidney
peak_23947	chr12	36807674	36808049	6.45381388987425	-5.84864064874298	1.57783443936849	-3.70675180032439	0.000209934501860831	0.003666927450195	0	85.5	FFPE-ATAC in FFPE kidney
peak_33430	chr13_random	125822	126274	6.45381388987425	-5.84864064874298	1.57783443936849	-3.70675180032439	0.000209934501860831	0.003666927450195	0	102	FFPE-ATAC in FFPE kidney
peak_40826	chr15	59266233	59266517	6.45381388987425	-5.84864064874298	1.57783443936849	-3.70675180032439	0.000209934501860831	0.003666927450195	0	65.5	FFPE-ATAC in FFPE kidney
peak_65632	chr2	101590745	101591026	6.45381388987425	-5.84864064874298	1.57783443936849	-3.70675180032439	0.000209934501860831	0.003666927450195	0	64.5	FFPE-ATAC in FFPE kidney
peak_82093	chr4	129477766	129477979	6.45381388987425	-5.84864064874298	1.57783443936849	-3.70675180032439	0.000209934501860831	0.003666927450195	0	47.5	FFPE-ATAC in FFPE kidney
peak_101053	chr7	66929865	66930124	6.45381388987425	-5.84864064874298	1.57783443936849	-3.70675180032439	0.000209934501860831	0.003666927450195	0	58.5	FFPE-ATAC in FFPE kidney
peak_112323	chr8_random	710150	710471	6.45381388987425	-5.84864064874298	1.57783443936849	-3.70675180032439	0.000209934501860831	0.003666927450195	0	74.5	FFPE-ATAC in FFPE kidney
peak_5571	chr1	153049337	153049654	11.1044930978442	-4.10717724317239	1.10837575896279	-3.70558198333015	0.00021090589448594	0.00367176000457491	3	115	FFPE-ATAC in FFPE kidney
peak_35953	chr14	55395269	55395638	11.1044930978442	-4.10717724317239	1.10837575896279	-3.70558198333015	0.00021090589448594	0.00367176000457491	4	133	FFPE-ATAC in FFPE kidney
peak_48833	chr17	13167475	13168135	11.1044930978442	-4.10717724317239	1.10837575896279	-3.70558198333015	0.00021090589448594	0.00367176000457491	7.5	244	FFPE-ATAC in FFPE kidney
peak_106605	chr8	19682342	19682639	11.1044930978442	-4.10717724317239	1.10837575896279	-3.70558198333015	0.00021090589448594	0.00367176000457491	2.5	107	FFPE-ATAC in FFPE kidney
peak_9370	chr10	22969613	22969952	6.46307724697723	-5.85014390152291	1.57877476735347	-3.7054962002779	0.000210977292882397	0.00367176000457491	1	77	FFPE-ATAC in FFPE kidney
peak_28096	chr13	14677262	14677622	6.46307724697723	-5.85014390152291	1.57877476735347	-3.7054962002779	0.000210977292882397	0.00367176000457491	1	78.5	FFPE-ATAC in FFPE kidney
peak_36816	chr14	68939116	68939320	6.46307724697723	-5.85014390152291	1.57877476735347	-3.7054962002779	0.000210977292882397	0.00367176000457491	0	45	FFPE-ATAC in FFPE kidney
peak_48864	chr17	13552999	13553209	6.46307724697723	-5.85014390152291	1.57877476735347	-3.7054962002779	0.000210977292882397	0.00367176000457491	0	46.5	FFPE-ATAC in FFPE kidney
peak_58663	chr19	25711013	25711508	6.46307724697723	-5.85014390152291	1.57877476735347	-3.7054962002779	0.000210977292882397	0.00367176000457491	1	111	FFPE-ATAC in FFPE kidney
peak_65320	chr2	91373387	91373613	6.46307724697723	-5.85014390152291	1.57877476735347	-3.7054962002779	0.000210977292882397	0.00367176000457491	0	51.5	FFPE-ATAC in FFPE kidney
peak_69204	chr2	165440291	165440838	6.46307724697723	-5.85014390152291	1.57877476735347	-3.7054962002779	0.000210977292882397	0.00367176000457491	1	122	FFPE-ATAC in FFPE kidney
peak_72649	chr3	71558397	71558880	6.46307724697723	-5.85014390152291	1.57877476735347	-3.7054962002779	0.000210977292882397	0.00367176000457491	1.5	110.5	FFPE-ATAC in FFPE kidney
peak_77311	chr4	14815083	14815680	6.46307724697723	-5.85014390152291	1.57877476735347	-3.7054962002779	0.000210977292882397	0.00367176000457491	2.5	133	FFPE-ATAC in FFPE kidney
peak_82316	chr4	131989329	131989818	6.46307724697723	-5.85014390152291	1.57877476735347	-3.7054962002779	0.000210977292882397	0.00367176000457491	0	108.5	FFPE-ATAC in FFPE kidney
peak_88256	chr5	98146309	98146931	6.46307724697723	-5.85014390152291	1.57877476735347	-3.7054962002779	0.000210977292882397	0.00367176000457491	1	141	FFPE-ATAC in FFPE kidney
peak_89244	chr5	114158934	114159408	6.46307724697723	-5.85014390152291	1.57877476735347	-3.7054962002779	0.000210977292882397	0.00367176000457491	1	107	FFPE-ATAC in FFPE kidney
peak_92689	chr6	23128247	23129422	6.46307724697723	-5.85014390152291	1.57877476735347	-3.7054962002779	0.000210977292882397	0.00367176000457491	5.5	261	FFPE-ATAC in FFPE kidney
peak_101035	chr7	64983207	64983686	6.46307724697723	-5.85014390152291	1.57877476735347	-3.7054962002779	0.000210977292882397	0.00367176000457491	2	106.5	FFPE-ATAC in FFPE kidney
peak_117929	chr9	116252661	116253176	6.46307724697723	-5.85014390152291	1.57877476735347	-3.7054962002779	0.000210977292882397	0.00367176000457491	1.5	116	FFPE-ATAC in FFPE kidney
peak_79026	chr4	61293425	61293631	6.45072610417326	-5.84813767821625	1.57892336408958	-3.70387683862563	0.000212329375715409	0.00369056630313825	0	48	FFPE-ATAC in FFPE kidney
peak_48197	chr17	3012848	3013123	6.46616503267822	-5.85065186782222	1.58050472064833	-3.70176171661307	0.000214107650183798	0.0037171925716857	0	60.5	FFPE-ATAC in FFPE kidney
peak_79444	chr4	78524991	78525210	6.46616503267822	-5.85065186782222	1.58050472064833	-3.70176171661307	0.000214107650183798	0.0037171925716857	0	49.5	FFPE-ATAC in FFPE kidney
peak_81359	chr4	117710930	117711130	6.46616503267822	-5.85065186782222	1.58050472064833	-3.70176171661307	0.000214107650183798	0.0037171925716857	0	45	FFPE-ATAC in FFPE kidney
peak_33446	chr13_random	325016	325217	6.44763831847226	-5.84762938239629	1.58073266014807	-3.69931584879668	0.000216181431045287	0.00374998280302359	0	46.5	FFPE-ATAC in FFPE kidney
peak_118765	chrUn_random	5251009	5251242	14.230420563391	-5.51537972461396	1.49137156817402	-3.69819288654322	0.000217139862453555	0.00376392274908085	1	112.5	FFPE-ATAC in FFPE kidney
peak_118736	chrUn_random	5090175	5090467	6.46925281837922	-5.85116741695636	1.58297757668786	-3.69630467488936	0.000218760422344893	0.00378877218719684	0	65	FFPE-ATAC in FFPE kidney
peak_99101	chr7	7250023	7250745	11.0067821855739	-3.46542856873974	0.940723694706044	-3.68379003127227	0.000229791548962265	0.00395279182935457	7.5	251	FFPE-ATAC in FFPE kidney
peak_84653	chr5	4763131	4763402	11.0098699712749	-3.46571246340047	0.941300029997482	-3.68183613402173	0.000231560233006052	0.00397758770173064	4.5	95	FFPE-ATAC in FFPE kidney
peak_70199	chr2	181162625	181163244	14.0332740645807	-5.49464827731475	1.49242742620952	-3.68168540782589	0.00023169720105364	0.00397881601199105	2	292	FFPE-ATAC in FFPE kidney
peak_70322	chr3	8245226	8246670	11.5101111169655	-3.07902428936321	0.837546294358544	-3.67624370151546	0.000236693422752816	0.0040554473916171	28	516.5	FFPE-ATAC in FFPE kidney
peak_68392	chr2	154395045	154395278	9.51566648106182	3.0789843058779	0.838004873051226	3.67418424986854	0.000238610510065649	0.0040871421791772	38	9	standard ATAC in FFPE kidney
peak_44112	chr16	10975052	10975381	10.898083241931	-4.07874696503425	1.11019381170605	-3.67390533258909	0.000238871263861532	0.00409045588393622	4	120	FFPE-ATAC in FFPE kidney
peak_84888	chr5	15051833	15052359	10.898083241931	-4.07874696503425	1.11019381170605	-3.67390533258909	0.000238871263861532	0.00409045588393622	5	189.5	FFPE-ATAC in FFPE kidney
peak_27403	chr12	116852401	116852981	10.89499545623	-4.07846540377118	1.1104649073876	-3.67275487648313	0.000239949628925519	0.00410602993956951	4	209.5	FFPE-ATAC in FFPE kidney
peak_18096	chr11	68651278	68651552	10.907346599034	-4.07959383255288	1.11118336028954	-3.6713957195056	0.000241229502148227	0.00412386769781283	3.5	97.5	FFPE-ATAC in FFPE kidney
peak_64819	chr2	76375513	76376231	10.9015080177602	-4.0797626994318	1.11185563665393	-3.66932771210264	0.000243189168289566	0.00415503134981768	8	254	FFPE-ATAC in FFPE kidney
peak_108042	chr8	56205646	56205874	13.8114252801625	-5.47186746304339	1.49309708119012	-3.66477674625275	0.000247554429926849	0.00422190049377489	2	109.5	FFPE-ATAC in FFPE kidney
peak_7304	chr1	182172458	182172818	6.25666739106401	-5.80359823612677	1.58568031521996	-3.66000522326073	0.000252210107129822	0.00426753466827464	0	79	FFPE-ATAC in FFPE kidney
peak_11507	chr10	69888716	69889145	6.25666739106401	-5.80359823612677	1.58568031521996	-3.66000522326073	0.000252210107129822	0.00426753466827464	1	92.5	FFPE-ATAC in FFPE kidney
peak_13098	chr10	93565319	93565519	6.25666739106401	-5.80359823612677	1.58568031521996	-3.66000522326073	0.000252210107129822	0.00426753466827464	0	43.5	FFPE-ATAC in FFPE kidney
peak_15707	chr11	19135696	19136099	6.25666739106401	-5.80359823612677	1.58568031521996	-3.66000522326073	0.000252210107129822	0.00426753466827464	0	89.5	FFPE-ATAC in FFPE kidney
peak_24542	chr12	60239044	60239361	6.25666739106401	-5.80359823612677	1.58568031521996	-3.66000522326073	0.000252210107129822	0.00426753466827464	0	70	FFPE-ATAC in FFPE kidney
peak_29769	chr13	47015895	47016172	6.25666739106401	-5.80359823612677	1.58568031521996	-3.66000522326073	0.000252210107129822	0.00426753466827464	1	59	FFPE-ATAC in FFPE kidney
peak_30959	chr13	66399608	66399950	6.25666739106401	-5.80359823612677	1.58568031521996	-3.66000522326073	0.000252210107129822	0.00426753466827464	0	73	FFPE-ATAC in FFPE kidney
peak_31579	chr13	90489668	90490468	6.25666739106401	-5.80359823612677	1.58568031521996	-3.66000522326073	0.000252210107129822	0.00426753466827464	3	174	FFPE-ATAC in FFPE kidney
peak_32639	chr13	106363126	106363456	6.25666739106401	-5.80359823612677	1.58568031521996	-3.66000522326073	0.000252210107129822	0.00426753466827464	1	72	FFPE-ATAC in FFPE kidney
peak_33076	chr13	112960724	112961209	6.25666739106401	-5.80359823612677	1.58568031521996	-3.66000522326073	0.000252210107129822	0.00426753466827464	2	104.5	FFPE-ATAC in FFPE kidney
peak_35725	chr14	50446299	50446869	6.25666739106401	-5.80359823612677	1.58568031521996	-3.66000522326073	0.000252210107129822	0.00426753466827464	0	124.5	FFPE-ATAC in FFPE kidney
peak_40317	chr15	42900759	42901187	6.25666739106401	-5.80359823612677	1.58568031521996	-3.66000522326073	0.000252210107129822	0.00426753466827464	1	91	FFPE-ATAC in FFPE kidney
peak_50712	chr17	43892742	43893022	6.25666739106401	-5.80359823612677	1.58568031521996	-3.66000522326073	0.000252210107129822	0.00426753466827464	0	60	FFPE-ATAC in FFPE kidney
peak_53253	chr17_random	279311	279715	6.25666739106401	-5.80359823612677	1.58568031521996	-3.66000522326073	0.000252210107129822	0.00426753466827464	0	88.5	FFPE-ATAC in FFPE kidney
peak_60543	chr19	56853099	56853322	6.25666739106401	-5.80359823612677	1.58568031521996	-3.66000522326073	0.000252210107129822	0.00426753466827464	0	48	FFPE-ATAC in FFPE kidney
peak_78967	chr4	60094506	60094795	6.25666739106401	-5.80359823612677	1.58568031521996	-3.66000522326073	0.000252210107129822	0.00426753466827464	0	62.5	FFPE-ATAC in FFPE kidney
peak_78992	chr4	60549609	60550186	6.25666739106401	-5.80359823612677	1.58568031521996	-3.66000522326073	0.000252210107129822	0.00426753466827464	2	127	FFPE-ATAC in FFPE kidney
peak_79016	chr4	61138838	61139062	6.25666739106401	-5.80359823612677	1.58568031521996	-3.66000522326073	0.000252210107129822	0.00426753466827464	0	48	FFPE-ATAC in FFPE kidney
peak_79426	chr4	76615731	76615939	6.25666739106401	-5.80359823612677	1.58568031521996	-3.66000522326073	0.000252210107129822	0.00426753466827464	0	46	FFPE-ATAC in FFPE kidney
peak_86744	chr5	61883689	61883953	6.25666739106401	-5.80359823612677	1.58568031521996	-3.66000522326073	0.000252210107129822	0.00426753466827464	0	57.5	FFPE-ATAC in FFPE kidney
peak_88957	chr5	109111565	109111945	6.25666739106401	-5.80359823612677	1.58568031521996	-3.66000522326073	0.000252210107129822	0.00426753466827464	1.5	84	FFPE-ATAC in FFPE kidney
peak_90955	chr5	137632894	137633228	6.25666739106401	-5.80359823612677	1.58568031521996	-3.66000522326073	0.000252210107129822	0.00426753466827464	1	73	FFPE-ATAC in FFPE kidney
peak_97769	chr6	131297618	131298417	6.25666739106401	-5.80359823612677	1.58568031521996	-3.66000522326073	0.000252210107129822	0.00426753466827464	0.5	178.5	FFPE-ATAC in FFPE kidney
peak_98276	chr6	140581771	140582005	6.25666739106401	-5.80359823612677	1.58568031521996	-3.66000522326073	0.000252210107129822	0.00426753466827464	0	51.5	FFPE-ATAC in FFPE kidney
peak_98383	chr6	142329089	142329681	6.25666739106401	-5.80359823612677	1.58568031521996	-3.66000522326073	0.000252210107129822	0.00426753466827464	2	132	FFPE-ATAC in FFPE kidney
peak_100447	chr7	48444767	48446308	6.25666739106401	-5.80359823612677	1.58568031521996	-3.66000522326073	0.000252210107129822	0.00426753466827464	5	339.5	FFPE-ATAC in FFPE kidney
peak_101872	chr7	84196237	84196732	6.25666739106401	-5.80359823612677	1.58568031521996	-3.66000522326073	0.000252210107129822	0.00426753466827464	1	108	FFPE-ATAC in FFPE kidney
peak_106598	chr8	19300761	19300993	6.25666739106401	-5.80359823612677	1.58568031521996	-3.66000522326073	0.000252210107129822	0.00426753466827464	0	51	FFPE-ATAC in FFPE kidney
peak_111902	chr8	127536167	127536942	6.25666739106401	-5.80359823612677	1.58568031521996	-3.66000522326073	0.000252210107129822	0.00426753466827464	0	169.5	FFPE-ATAC in FFPE kidney
peak_114056	chr9	47029027	47029464	6.25666739106401	-5.80359823612677	1.58568031521996	-3.66000522326073	0.000252210107129822	0.00426753466827464	1	95	FFPE-ATAC in FFPE kidney
peak_42619	chr15	89048274	89048474	6.25357960536302	-5.80307723114152	1.58571426295348	-3.65959830640166	0.00025261092150688	0.00426753466827464	0	43.5	FFPE-ATAC in FFPE kidney
peak_48528	chr17	8162570	8163283	6.25357960536302	-5.80307723114152	1.58571426295348	-3.65959830640166	0.00025261092150688	0.00426753466827464	0	155.5	FFPE-ATAC in FFPE kidney
peak_57106	chr18	82871166	82871524	6.25357960536302	-5.80307723114152	1.58571426295348	-3.65959830640166	0.00025261092150688	0.00426753466827464	0	78.5	FFPE-ATAC in FFPE kidney
peak_58549	chr19	24434770	24435215	6.25357960536302	-5.80307723114152	1.58571426295348	-3.65959830640166	0.00025261092150688	0.00426753466827464	0	95.5	FFPE-ATAC in FFPE kidney
peak_65112	chr2	84345446	84345646	6.25357960536302	-5.80307723114152	1.58571426295348	-3.65959830640166	0.00025261092150688	0.00426753466827464	0	43.5	FFPE-ATAC in FFPE kidney
peak_72860	chr3	81874157	81874494	6.25357960536302	-5.80307723114152	1.58571426295348	-3.65959830640166	0.00025261092150688	0.00426753466827464	0.5	74	FFPE-ATAC in FFPE kidney
peak_73314	chr3	88592600	88592809	6.25357960536302	-5.80307723114152	1.58571426295348	-3.65959830640166	0.00025261092150688	0.00426753466827464	0	46.5	FFPE-ATAC in FFPE kidney
peak_76504	chr3	149758066	149758416	6.25357960536302	-5.80307723114152	1.58571426295348	-3.65959830640166	0.00025261092150688	0.00426753466827464	0	75	FFPE-ATAC in FFPE kidney
peak_82268	chr4	131602149	131602350	6.25357960536302	-5.80307723114152	1.58571426295348	-3.65959830640166	0.00025261092150688	0.00426753466827464	0	45	FFPE-ATAC in FFPE kidney
peak_95277	chr6	85753508	85754033	6.25357960536302	-5.80307723114152	1.58571426295348	-3.65959830640166	0.00025261092150688	0.00426753466827464	2	114.5	FFPE-ATAC in FFPE kidney
peak_103314	chr7	112003992	112004470	6.25357960536302	-5.80307723114152	1.58571426295348	-3.65959830640166	0.00025261092150688	0.00426753466827464	2	105.5	FFPE-ATAC in FFPE kidney
peak_108549	chr8	72007559	72007769	6.25357960536302	-5.80307723114152	1.58571426295348	-3.65959830640166	0.00025261092150688	0.00426753466827464	0	45	FFPE-ATAC in FFPE kidney
peak_110289	chr8	107412010	107412785	6.25357960536302	-5.80307723114152	1.58571426295348	-3.65959830640166	0.00025261092150688	0.00426753466827464	0	167	FFPE-ATAC in FFPE kidney
peak_112351	chr8_random	848279	848680	6.25357960536302	-5.80307723114152	1.58571426295348	-3.65959830640166	0.00025261092150688	0.00426753466827464	0	90	FFPE-ATAC in FFPE kidney
peak_115974	chr9	76726063	76726705	6.25357960536302	-5.80307723114152	1.58571426295348	-3.65959830640166	0.00025261092150688	0.00426753466827464	1	142	FFPE-ATAC in FFPE kidney
peak_3154	chr1	85319790	85320114	6.25975517676501	-5.80412054364939	1.58640289361594	-3.65866739590965	0.000253530118902631	0.00426753466827464	0	70.5	FFPE-ATAC in FFPE kidney
peak_3376	chr1	89962832	89963315	6.25975517676501	-5.80412054364939	1.58640289361594	-3.65866739590965	0.000253530118902631	0.00426753466827464	0	105	FFPE-ATAC in FFPE kidney
peak_7107	chr1	178970549	178970999	6.25975517676501	-5.80412054364939	1.58640289361594	-3.65866739590965	0.000253530118902631	0.00426753466827464	1	97.5	FFPE-ATAC in FFPE kidney
peak_9704	chr10	32143294	32143731	6.25975517676501	-5.80412054364939	1.58640289361594	-3.65866739590965	0.000253530118902631	0.00426753466827464	0	96	FFPE-ATAC in FFPE kidney
peak_27623	chr13	3373231	3373650	6.25975517676501	-5.80412054364939	1.58640289361594	-3.65866739590965	0.000253530118902631	0.00426753466827464	0	90.5	FFPE-ATAC in FFPE kidney
peak_37003	chr14	72262884	72263220	6.25975517676501	-5.80412054364939	1.58640289361594	-3.65866739590965	0.000253530118902631	0.00426753466827464	0	72	FFPE-ATAC in FFPE kidney
peak_47014	chr16	75207716	75208110	6.25975517676501	-5.80412054364939	1.58640289361594	-3.65866739590965	0.000253530118902631	0.00426753466827464	1	83.5	FFPE-ATAC in FFPE kidney
peak_58220	chr19	17422366	17422574	6.25975517676501	-5.80412054364939	1.58640289361594	-3.65866739590965	0.000253530118902631	0.00426753466827464	0	45	FFPE-ATAC in FFPE kidney
peak_60451	chr19	55845192	55845581	6.25975517676501	-5.80412054364939	1.58640289361594	-3.65866739590965	0.000253530118902631	0.00426753466827464	0	82	FFPE-ATAC in FFPE kidney
peak_63968	chr2	62310855	62311344	6.25975517676501	-5.80412054364939	1.58640289361594	-3.65866739590965	0.000253530118902631	0.00426753466827464	2	107	FFPE-ATAC in FFPE kidney
peak_66759	chr2	122295709	122296159	6.25975517676501	-5.80412054364939	1.58640289361594	-3.65866739590965	0.000253530118902631	0.00426753466827464	1	97.5	FFPE-ATAC in FFPE kidney
peak_66920	chr2	126291562	126291907	6.25975517676501	-5.80412054364939	1.58640289361594	-3.65866739590965	0.000253530118902631	0.00426753466827464	1.5	75	FFPE-ATAC in FFPE kidney
peak_69931	chr2	173832730	173832986	6.25975517676501	-5.80412054364939	1.58640289361594	-3.65866739590965	0.000253530118902631	0.00426753466827464	0	56	FFPE-ATAC in FFPE kidney
peak_75111	chr3	121742215	121742417	6.25975517676501	-5.80412054364939	1.58640289361594	-3.65866739590965	0.000253530118902631	0.00426753466827464	0	43.5	FFPE-ATAC in FFPE kidney
peak_76758	chr3	154272032	154272263	6.25975517676501	-5.80412054364939	1.58640289361594	-3.65866739590965	0.000253530118902631	0.00426753466827464	0	50	FFPE-ATAC in FFPE kidney
peak_79901	chr4	90494057	90494500	6.25975517676501	-5.80412054364939	1.58640289361594	-3.65866739590965	0.000253530118902631	0.00426753466827464	1	98.5	FFPE-ATAC in FFPE kidney
peak_80770	chr4	106844259	106844491	6.25975517676501	-5.80412054364939	1.58640289361594	-3.65866739590965	0.000253530118902631	0.00426753466827464	0.5	50	FFPE-ATAC in FFPE kidney
peak_83665	chr4	147045367	147045684	6.25975517676501	-5.80412054364939	1.58640289361594	-3.65866739590965	0.000253530118902631	0.00426753466827464	0	68.5	FFPE-ATAC in FFPE kidney
peak_86714	chr5	55797375	55797717	6.25975517676501	-5.80412054364939	1.58640289361594	-3.65866739590965	0.000253530118902631	0.00426753466827464	0	75.5	FFPE-ATAC in FFPE kidney
peak_87240	chr5	72975969	72976427	6.25975517676501	-5.80412054364939	1.58640289361594	-3.65866739590965	0.000253530118902631	0.00426753466827464	0.5	100.5	FFPE-ATAC in FFPE kidney
peak_98963	chr7	4600609	4602368	6.25975517676501	-5.80412054364939	1.58640289361594	-3.65866739590965	0.000253530118902631	0.00426753466827464	6	382	FFPE-ATAC in FFPE kidney
peak_103619	chr7	118115377	118115687	6.25975517676501	-5.80412054364939	1.58640289361594	-3.65866739590965	0.000253530118902631	0.00426753466827464	1	67.5	FFPE-ATAC in FFPE kidney
peak_104078	chr7	124514644	124514985	6.25975517676501	-5.80412054364939	1.58640289361594	-3.65866739590965	0.000253530118902631	0.00426753466827464	0	75	FFPE-ATAC in FFPE kidney
peak_104325	chr7	128223841	128224168	6.25975517676501	-5.80412054364939	1.58640289361594	-3.65866739590965	0.000253530118902631	0.00426753466827464	0	72.5	FFPE-ATAC in FFPE kidney
peak_106835	chr8	25042133	25042510	6.25975517676501	-5.80412054364939	1.58640289361594	-3.65866739590965	0.000253530118902631	0.00426753466827464	0	79.5	FFPE-ATAC in FFPE kidney
peak_112161	chr8	129627799	129628036	6.25975517676501	-5.80412054364939	1.58640289361594	-3.65866739590965	0.000253530118902631	0.00426753466827464	0	51.5	FFPE-ATAC in FFPE kidney
peak_116243	chr9	82574453	82575100	6.25975517676501	-5.80412054364939	1.58640289361594	-3.65866739590965	0.000253530118902631	0.00426753466827464	0	139.5	FFPE-ATAC in FFPE kidney
peak_118737	chrUn_random	5090543	5090834	6.25975517676501	-5.80412054364939	1.58640289361594	-3.65866739590965	0.000253530118902631	0.00426753466827464	0	62	FFPE-ATAC in FFPE kidney
peak_58429	chr19	21990949	21991149	6.25049181966203	-5.802554797429	1.58650578267007	-3.65744320683367	0.000254743679949703	0.00428091607686521	0	44	FFPE-ATAC in FFPE kidney
peak_79015	chr4	61134927	61135975	6.25049181966203	-5.802554797429	1.58650578267007	-3.65744320683367	0.000254743679949703	0.00428091607686521	0	235.5	FFPE-ATAC in FFPE kidney
peak_7305	chr1	182172953	182173986	6.262842962466	-5.8046468715072	1.5878926450967	-3.65556631893946	0.000256614856176221	0.00429921835394241	2	221.5	FFPE-ATAC in FFPE kidney
peak_21595	chr11	110314920	110315140	6.262842962466	-5.8046468715072	1.5878926450967	-3.65556631893946	0.000256614856176221	0.00429921835394241	0.5	47	FFPE-ATAC in FFPE kidney
peak_27325	chr12	115297983	115298183	6.262842962466	-5.8046468715072	1.5878926450967	-3.65556631893946	0.000256614856176221	0.00429921835394241	0	43	FFPE-ATAC in FFPE kidney
peak_29742	chr13	46479935	46480351	6.262842962466	-5.8046468715072	1.5878926450967	-3.65556631893946	0.000256614856176221	0.00429921835394241	0	87	FFPE-ATAC in FFPE kidney
peak_37565	chr14	83656350	83656633	6.262842962466	-5.8046468715072	1.5878926450967	-3.65556631893946	0.000256614856176221	0.00429921835394241	0	61	FFPE-ATAC in FFPE kidney
peak_38041	chr14	105686003	105686205	6.262842962466	-5.8046468715072	1.5878926450967	-3.65556631893946	0.000256614856176221	0.00429921835394241	0	43	FFPE-ATAC in FFPE kidney
peak_43971	chr16	7898917	7899275	6.262842962466	-5.8046468715072	1.5878926450967	-3.65556631893946	0.000256614856176221	0.00429921835394241	1	76	FFPE-ATAC in FFPE kidney
peak_60928	chr2	3069341	3069726	6.262842962466	-5.8046468715072	1.5878926450967	-3.65556631893946	0.000256614856176221	0.00429921835394241	1	82.5	FFPE-ATAC in FFPE kidney
peak_61144	chr2	6183201	6183683	6.262842962466	-5.8046468715072	1.5878926450967	-3.65556631893946	0.000256614856176221	0.00429921835394241	2	104.5	FFPE-ATAC in FFPE kidney
peak_86762	chr5	63468884	63469254	6.262842962466	-5.8046468715072	1.5878926450967	-3.65556631893946	0.000256614856176221	0.00429921835394241	0	78	FFPE-ATAC in FFPE kidney
peak_95004	chr6	81631360	81631711	6.262842962466	-5.8046468715072	1.5878926450967	-3.65556631893946	0.000256614856176221	0.00429921835394241	0	73.5	FFPE-ATAC in FFPE kidney
peak_98925	chr7	4056038	4056681	6.262842962466	-5.8046468715072	1.5878926450967	-3.65556631893946	0.000256614856176221	0.00429921835394241	2.5	137	FFPE-ATAC in FFPE kidney
peak_100373	chr7	46460923	46461239	6.262842962466	-5.8046468715072	1.5878926450967	-3.65556631893946	0.000256614856176221	0.00429921835394241	0	67	FFPE-ATAC in FFPE kidney
peak_102622	chr7	99485039	99485672	6.262842962466	-5.8046468715072	1.5878926450967	-3.65556631893946	0.000256614856176221	0.00429921835394241	1	138	FFPE-ATAC in FFPE kidney
peak_112330	chr8_random	745512	745735	6.262842962466	-5.8046468715072	1.5878926450967	-3.65556631893946	0.000256614856176221	0.00429921835394241	0	47	FFPE-ATAC in FFPE kidney
peak_19773	chr11	88465498	88465828	6.24740403396103	-5.80202820932567	1.58806761343844	-3.6535145986406	0.000258675074011413	0.00433015377266916	1	74	FFPE-ATAC in FFPE kidney
peak_33431	chr13_random	131059	131386	6.24740403396103	-5.80202820932567	1.58806761343844	-3.6535145986406	0.000258675074011413	0.00433015377266916	0	74	FFPE-ATAC in FFPE kidney
peak_112331	chr8_random	745849	746457	6.24740403396103	-5.80202820932567	1.58806761343844	-3.6535145986406	0.000258675074011413	0.00433015377266916	0	135.5	FFPE-ATAC in FFPE kidney
peak_49112	chr17	21519037	21519237	6.265930748167	-5.80517982159759	1.59017281387031	-3.65065970878248	0.000261567602678434	0.0043725528124314	0	42	FFPE-ATAC in FFPE kidney
peak_102099	chr7	87938732	87938990	6.265930748167	-5.80517982159759	1.59017281387031	-3.65065970878248	0.000261567602678434	0.0043725528124314	0	56	FFPE-ATAC in FFPE kidney
peak_76865	chr4	3008373	3008603	13.6266299241563	-5.45137629449124	1.49332016453377	-3.65050738881117	0.000261722779802059	0.00437454530508146	2.5	107.5	FFPE-ATAC in FFPE kidney
peak_60596	chr19	57187783	57188190	13.6328054955583	-5.45182565166505	1.4942005582179	-3.64865721785523	0.000263614559892307	0.0044019286207072	2.5	189	FFPE-ATAC in FFPE kidney
peak_64280	chr2	69399770	69400040	10.8034601153617	-3.43613901576486	0.942996420940682	-3.64385159843678	0.000268588319916579	0.00447762295363382	3.5	93	FFPE-ATAC in FFPE kidney
peak_31416	chr13	81117322	81117906	10.8007093197889	-3.43657075880585	0.943115224524776	-3.6438503689064	0.000268589603648266	0.00447762295363382	10.5	202	FFPE-ATAC in FFPE kidney
peak_88339	chr5	100403355	100403569	10.8065479010627	-3.43642864394061	0.943405918107159	-3.64257694167896	0.000269922259399349	0.00449860564047471	3.5	74	FFPE-ATAC in FFPE kidney
peak_100353	chr7	39208212	39208577	10.6978489574198	-4.05031838819909	1.11227074294171	-3.64148604456403	0.000271068821784023	0.00451461984536963	4	131.5	FFPE-ATAC in FFPE kidney
peak_112126	chr8	129414897	129415626	10.8068848911909	-3.43715719846686	0.944314445611275	-3.63984392533772	0.000272803344277623	0.00453977628251403	12	248	FFPE-ATAC in FFPE kidney
peak_88099	chr5	93452532	93453043	10.7040245288218	-4.05089481154921	1.11295360236301	-3.6397697109281	0.000272881979948435	0.00454004104954523	5	179.5	FFPE-ATAC in FFPE kidney
peak_84869	chr5	14986744	14987477	10.7914459626859	-3.43570078973304	0.944143739637542	-3.63895945658869	0.000273741887746708	0.0045510337584848	9	257.5	FFPE-ATAC in FFPE kidney
peak_20710	chr11	100679436	100679644	10.7098631100956	-4.05072415756058	1.11483947167893	-3.63345957912689	0.00027964627285685	0.00463209149932826	2.5	72	FFPE-ATAC in FFPE kidney
peak_77245	chr4	11975651	11976403	10.7098631100956	-4.05072415756058	1.11483947167893	-3.63345957912689	0.00027964627285685	0.00463209149932826	8	258	FFPE-ATAC in FFPE kidney
peak_65705	chr2	102291740	102291940	8.02218446032379	4.23820913130632	1.16647490139641	3.63334789821254	0.00027976739486808	0.0046322042481263	25.5	2.5	standard ATAC in FFPE kidney
peak_15577	chr11	12274950	12275365	11.3129646181552	-3.05087895931896	0.840630058684684	-3.62927655013027	0.000284216630338691	0.00469691550441717	8	145	FFPE-ATAC in FFPE kidney
peak_11237	chr10	67606001	67606219	10.7886951671131	-3.43614872449749	0.946936347792685	-3.62870084405058	0.000284851095174142	0.00470530759894346	3.5	76	FFPE-ATAC in FFPE kidney
peak_112308	chr8_random	396534	397023	11.309539842326	-3.04991936718446	0.840861452748846	-3.62713661949185	0.00028658167794859	0.00472764487693614	9	174.5	FFPE-ATAC in FFPE kidney
peak_76868	chr4	3011264	3011586	13.2196487936036	-5.40635433206981	1.49429575209809	-3.61799484772605	0.000296894305364041	0.00488054892998977	1	147.5	FFPE-ATAC in FFPE kidney
peak_118666	chrUn_random	3916543	3916885	13.2196487936036	-5.40635433206981	1.49429575209809	-3.61799484772605	0.000296894305364041	0.00488054892998977	2	155	FFPE-ATAC in FFPE kidney
peak_121462	chrX	166436849	166437119	13.2199857837318	-5.4067693656833	1.49444413919057	-3.61791332569428	0.00029698781283674	0.00488076605105928	2.5	121.5	FFPE-ATAC in FFPE kidney
peak_2363	chr1	69293377	69293680	6.05334532085179	-5.75603242943229	1.59355430759468	-3.61207170787953	0.0003037605371713	0.0049469030827577	0.5	64.5	FFPE-ATAC in FFPE kidney
peak_6795	chr1	172306267	172306622	6.05334532085179	-5.75603242943229	1.59355430759468	-3.61207170787953	0.0003037605371713	0.0049469030827577	0	73	FFPE-ATAC in FFPE kidney
peak_7196	chr1	180692656	180693059	6.05334532085179	-5.75603242943229	1.59355430759468	-3.61207170787953	0.0003037605371713	0.0049469030827577	0	85	FFPE-ATAC in FFPE kidney
peak_8024	chr1	193379147	193379919	6.05334532085179	-5.75603242943229	1.59355430759468	-3.61207170787953	0.0003037605371713	0.0049469030827577	0.5	167.5	FFPE-ATAC in FFPE kidney
peak_8206	chr1	195289215	195289485	6.05334532085179	-5.75603242943229	1.59355430759468	-3.61207170787953	0.0003037605371713	0.0049469030827577	0	57.5	FFPE-ATAC in FFPE kidney
peak_10596	chr10	57701857	57702476	6.05334532085179	-5.75603242943229	1.59355430759468	-3.61207170787953	0.0003037605371713	0.0049469030827577	2	132.5	FFPE-ATAC in FFPE kidney
peak_11642	chr10	73694433	73694774	6.05334532085179	-5.75603242943229	1.59355430759468	-3.61207170787953	0.0003037605371713	0.0049469030827577	0	71.5	FFPE-ATAC in FFPE kidney
peak_21822	chr11	115096192	115096606	6.05334532085179	-5.75603242943229	1.59355430759468	-3.61207170787953	0.0003037605371713	0.0049469030827577	1	86.5	FFPE-ATAC in FFPE kidney
peak_22638	chr12	3320824	3321534	6.05334532085179	-5.75603242943229	1.59355430759468	-3.61207170787953	0.0003037605371713	0.0049469030827577	1	153.5	FFPE-ATAC in FFPE kidney
peak_24329	chr12	54278773	54279213	6.05334532085179	-5.75603242943229	1.59355430759468	-3.61207170787953	0.0003037605371713	0.0049469030827577	1	91.5	FFPE-ATAC in FFPE kidney
peak_24631	chr12	70378146	70378497	6.05334532085179	-5.75603242943229	1.59355430759468	-3.61207170787953	0.0003037605371713	0.0049469030827577	1	73	FFPE-ATAC in FFPE kidney
peak_33113	chr13	113218987	113219294	6.05334532085179	-5.75603242943229	1.59355430759468	-3.61207170787953	0.0003037605371713	0.0049469030827577	0	66	FFPE-ATAC in FFPE kidney
peak_52084	chr17	72262911	72263512	6.05334532085179	-5.75603242943229	1.59355430759468	-3.61207170787953	0.0003037605371713	0.0049469030827577	2.5	129	FFPE-ATAC in FFPE kidney
peak_52757	chr17	84345209	84345455	6.05334532085179	-5.75603242943229	1.59355430759468	-3.61207170787953	0.0003037605371713	0.0049469030827577	0	52.5	FFPE-ATAC in FFPE kidney
peak_53265	chr17_random	348024	348607	6.05334532085179	-5.75603242943229	1.59355430759468	-3.61207170787953	0.0003037605371713	0.0049469030827577	0	121	FFPE-ATAC in FFPE kidney
peak_55261	chr18	49316663	49317010	6.05334532085179	-5.75603242943229	1.59355430759468	-3.61207170787953	0.0003037605371713	0.0049469030827577	1	73.5	FFPE-ATAC in FFPE kidney
peak_60856	chr19	61300173	61300528	6.05334532085179	-5.75603242943229	1.59355430759468	-3.61207170787953	0.0003037605371713	0.0049469030827577	0	75	FFPE-ATAC in FFPE kidney
peak_63171	chr2	43026539	43026770	6.05334532085179	-5.75603242943229	1.59355430759468	-3.61207170787953	0.0003037605371713	0.0049469030827577	0	48.5	FFPE-ATAC in FFPE kidney
peak_67153	chr2	128781740	128782111	6.05334532085179	-5.75603242943229	1.59355430759468	-3.61207170787953	0.0003037605371713	0.0049469030827577	0.5	78.5	FFPE-ATAC in FFPE kidney
peak_69341	chr2	166656155	166657303	6.05334532085179	-5.75603242943229	1.59355430759468	-3.61207170787953	0.0003037605371713	0.0049469030827577	4.5	245.5	FFPE-ATAC in FFPE kidney
peak_74064	chr3	98385679	98386857	6.05334532085179	-5.75603242943229	1.59355430759468	-3.61207170787953	0.0003037605371713	0.0049469030827577	3	244.5	FFPE-ATAC in FFPE kidney
peak_74098	chr3	98747904	98748598	6.05334532085179	-5.75603242943229	1.59355430759468	-3.61207170787953	0.0003037605371713	0.0049469030827577	2.5	147	FFPE-ATAC in FFPE kidney
peak_76105	chr3	142322435	142322830	6.05334532085179	-5.75603242943229	1.59355430759468	-3.61207170787953	0.0003037605371713	0.0049469030827577	0	83.5	FFPE-ATAC in FFPE kidney
peak_78982	chr4	60373092	60374942	6.05334532085179	-5.75603242943229	1.59355430759468	-3.61207170787953	0.0003037605371713	0.0049469030827577	6	394.5	FFPE-ATAC in FFPE kidney
peak_79002	chr4	60845715	60846393	6.05334532085179	-5.75603242943229	1.59355430759468	-3.61207170787953	0.0003037605371713	0.0049469030827577	0	144.5	FFPE-ATAC in FFPE kidney
peak_86615	chr5	53485516	53485864	6.05334532085179	-5.75603242943229	1.59355430759468	-3.61207170787953	0.0003037605371713	0.0049469030827577	0.5	73	FFPE-ATAC in FFPE kidney
peak_88321	chr5	99995929	99996818	6.05334532085179	-5.75603242943229	1.59355430759468	-3.61207170787953	0.0003037605371713	0.0049469030827577	3	183.5	FFPE-ATAC in FFPE kidney
peak_95373	chr6	86706986	86707342	6.05334532085179	-5.75603242943229	1.59355430759468	-3.61207170787953	0.0003037605371713	0.0049469030827577	0	76	FFPE-ATAC in FFPE kidney
peak_95425	chr6	87281933	87282504	6.05334532085179	-5.75603242943229	1.59355430759468	-3.61207170787953	0.0003037605371713	0.0049469030827577	1	122.5	FFPE-ATAC in FFPE kidney
peak_96329	chr6	101212140	101212472	6.05334532085179	-5.75603242943229	1.59355430759468	-3.61207170787953	0.0003037605371713	0.0049469030827577	0.5	72	FFPE-ATAC in FFPE kidney
peak_102635	chr7	99867004	99867241	6.05334532085179	-5.75603242943229	1.59355430759468	-3.61207170787953	0.0003037605371713	0.0049469030827577	0	50.5	FFPE-ATAC in FFPE kidney
peak_104062	chr7	123666438	123666803	6.05334532085179	-5.75603242943229	1.59355430759468	-3.61207170787953	0.0003037605371713	0.0049469030827577	0	77.5	FFPE-ATAC in FFPE kidney
peak_104395	chr7	129890980	129891194	6.05334532085179	-5.75603242943229	1.59355430759468	-3.61207170787953	0.0003037605371713	0.0049469030827577	0	45	FFPE-ATAC in FFPE kidney
peak_110287	chr8	107392645	107393254	6.05334532085179	-5.75603242943229	1.59355430759468	-3.61207170787953	0.0003037605371713	0.0049469030827577	0	130.5	FFPE-ATAC in FFPE kidney
peak_112332	chr8_random	749274	749793	6.05334532085179	-5.75603242943229	1.59355430759468	-3.61207170787953	0.0003037605371713	0.0049469030827577	0	111.5	FFPE-ATAC in FFPE kidney
peak_118816	chrUn_random	5821695	5822474	6.05334532085179	-5.75603242943229	1.59355430759468	-3.61207170787953	0.0003037605371713	0.0049469030827577	1	162.5	FFPE-ATAC in FFPE kidney
peak_121546	chrY_random	40763228	40763525	6.05334532085179	-5.75603242943229	1.59355430759468	-3.61207170787953	0.0003037605371713	0.0049469030827577	0	64	FFPE-ATAC in FFPE kidney
peak_7043	chr1	176657780	176658149	6.05643310655278	-5.75657520734029	1.59394132167674	-3.61153521089765	0.000304389745804906	0.0049469030827577	0	77.5	FFPE-ATAC in FFPE kidney
peak_7786	chr1	189667160	189667437	6.05643310655278	-5.75657520734029	1.59394132167674	-3.61153521089765	0.000304389745804906	0.0049469030827577	0	58	FFPE-ATAC in FFPE kidney
peak_8994	chr10	18372784	18373510	6.05643310655278	-5.75657520734029	1.59394132167674	-3.61153521089765	0.000304389745804906	0.0049469030827577	3	153.5	FFPE-ATAC in FFPE kidney
peak_22802	chr12	5682241	5682588	6.05643310655278	-5.75657520734029	1.59394132167674	-3.61153521089765	0.000304389745804906	0.0049469030827577	0.5	73	FFPE-ATAC in FFPE kidney
peak_32641	chr13	107290470	107290883	6.05643310655278	-5.75657520734029	1.59394132167674	-3.61153521089765	0.000304389745804906	0.0049469030827577	0	85.5	FFPE-ATAC in FFPE kidney
peak_32707	chr13	108649872	108650174	6.05643310655278	-5.75657520734029	1.59394132167674	-3.61153521089765	0.000304389745804906	0.0049469030827577	0	62.5	FFPE-ATAC in FFPE kidney
peak_33376	chr13	118489818	118490203	6.05643310655278	-5.75657520734029	1.59394132167674	-3.61153521089765	0.000304389745804906	0.0049469030827577	0	80.5	FFPE-ATAC in FFPE kidney
peak_35200	chr14	37050904	37051170	6.05643310655278	-5.75657520734029	1.59394132167674	-3.61153521089765	0.000304389745804906	0.0049469030827577	0	57.5	FFPE-ATAC in FFPE kidney
peak_49105	chr17	20300903	20301268	6.05643310655278	-5.75657520734029	1.59394132167674	-3.61153521089765	0.000304389745804906	0.0049469030827577	0	77	FFPE-ATAC in FFPE kidney
peak_49272	chr17	24761918	24762154	6.05643310655278	-5.75657520734029	1.59394132167674	-3.61153521089765	0.000304389745804906	0.0049469030827577	0	49	FFPE-ATAC in FFPE kidney
peak_52017	chr17	71420020	71420483	6.05643310655278	-5.75657520734029	1.59394132167674	-3.61153521089765	0.000304389745804906	0.0049469030827577	1	96	FFPE-ATAC in FFPE kidney
peak_52665	chr17	83503523	83504263	6.05643310655278	-5.75657520734029	1.59394132167674	-3.61153521089765	0.000304389745804906	0.0049469030827577	2	155	FFPE-ATAC in FFPE kidney
peak_53388	chr18	5219348	5219718	6.05643310655278	-5.75657520734029	1.59394132167674	-3.61153521089765	0.000304389745804906	0.0049469030827577	0.5	79.5	FFPE-ATAC in FFPE kidney
peak_60215	chr19	52562312	52562817	6.05643310655278	-5.75657520734029	1.59394132167674	-3.61153521089765	0.000304389745804906	0.0049469030827577	1	107.5	FFPE-ATAC in FFPE kidney
peak_61500	chr2	14121942	14122335	6.05643310655278	-5.75657520734029	1.59394132167674	-3.61153521089765	0.000304389745804906	0.0049469030827577	0	82	FFPE-ATAC in FFPE kidney
peak_68079	chr2	150041576	150041969	6.05643310655278	-5.75657520734029	1.59394132167674	-3.61153521089765	0.000304389745804906	0.0049469030827577	0	83.5	FFPE-ATAC in FFPE kidney
peak_68671	chr2	157270731	157271458	6.05643310655278	-5.75657520734029	1.59394132167674	-3.61153521089765	0.000304389745804906	0.0049469030827577	2.5	154	FFPE-ATAC in FFPE kidney
peak_77979	chr4	42168878	42169959	6.05643310655278	-5.75657520734029	1.59394132167674	-3.61153521089765	0.000304389745804906	0.0049469030827577	0	232.5	FFPE-ATAC in FFPE kidney
peak_77981	chr4	42197131	42198225	6.05643310655278	-5.75657520734029	1.59394132167674	-3.61153521089765	0.000304389745804906	0.0049469030827577	1	228	FFPE-ATAC in FFPE kidney
peak_85597	chr5	31991566	31991904	6.05643310655278	-5.75657520734029	1.59394132167674	-3.61153521089765	0.000304389745804906	0.0049469030827577	1	69.5	FFPE-ATAC in FFPE kidney
peak_87672	chr5	83785238	83785596	6.05643310655278	-5.75657520734029	1.59394132167674	-3.61153521089765	0.000304389745804906	0.0049469030827577	1	76	FFPE-ATAC in FFPE kidney
peak_88464	chr5	102345864	102346378	6.05643310655278	-5.75657520734029	1.59394132167674	-3.61153521089765	0.000304389745804906	0.0049469030827577	0.5	110	FFPE-ATAC in FFPE kidney
peak_93143	chr6	33057577	33058002	6.05643310655278	-5.75657520734029	1.59394132167674	-3.61153521089765	0.000304389745804906	0.0049469030827577	1	89.5	FFPE-ATAC in FFPE kidney
peak_93663	chr6	45394710	45395236	6.05643310655278	-5.75657520734029	1.59394132167674	-3.61153521089765	0.000304389745804906	0.0049469030827577	1	109	FFPE-ATAC in FFPE kidney
peak_94674	chr6	70649479	70649828	6.05643310655278	-5.75657520734029	1.59394132167674	-3.61153521089765	0.000304389745804906	0.0049469030827577	1	75	FFPE-ATAC in FFPE kidney
peak_98172	chr6	138475601	138475943	6.05643310655278	-5.75657520734029	1.59394132167674	-3.61153521089765	0.000304389745804906	0.0049469030827577	0	72.5	FFPE-ATAC in FFPE kidney
peak_98663	chr6	145968218	145968570	6.05643310655278	-5.75657520734029	1.59394132167674	-3.61153521089765	0.000304389745804906	0.0049469030827577	0	72.5	FFPE-ATAC in FFPE kidney
peak_104979	chr7	139225292	139226146	6.05643310655278	-5.75657520734029	1.59394132167674	-3.61153521089765	0.000304389745804906	0.0049469030827577	1	183.5	FFPE-ATAC in FFPE kidney
peak_106529	chr8	16343998	16344343	6.05643310655278	-5.75657520734029	1.59394132167674	-3.61153521089765	0.000304389745804906	0.0049469030827577	0	71.5	FFPE-ATAC in FFPE kidney
peak_107997	chr8	55118750	55119211	6.05643310655278	-5.75657520734029	1.59394132167674	-3.61153521089765	0.000304389745804906	0.0049469030827577	0	99.5	FFPE-ATAC in FFPE kidney
peak_112725	chr9	16134038	16134251	6.05643310655278	-5.75657520734029	1.59394132167674	-3.61153521089765	0.000304389745804906	0.0049469030827577	0	44	FFPE-ATAC in FFPE kidney
peak_116894	chr9	99493793	99494308	6.05643310655278	-5.75657520734029	1.59394132167674	-3.61153521089765	0.000304389745804906	0.0049469030827577	2	108.5	FFPE-ATAC in FFPE kidney
peak_85691	chr5	33076620	33076873	11.3012874556077	-3.05114792545323	0.844944095637123	-3.61106485175512	0.00030494239123197	0.0049505258881028	6	90	FFPE-ATAC in FFPE kidney
peak_99	chr1	9094477	9095067	6.0502575351508	-5.75548961116297	1.59398433408825	-3.61075669821755	0.000305304963501585	0.0049505258881028	1	125.5	FFPE-ATAC in FFPE kidney
peak_6291	chr1	164240799	164241025	6.0502575351508	-5.75548961116297	1.59398433408825	-3.61075669821755	0.000305304963501585	0.0049505258881028	0	48.5	FFPE-ATAC in FFPE kidney
peak_15821	chr11	20680727	20681222	6.0502575351508	-5.75548961116297	1.59398433408825	-3.61075669821755	0.000305304963501585	0.0049505258881028	0	104	FFPE-ATAC in FFPE kidney
peak_25862	chr12	86478538	86478759	6.0502575351508	-5.75548961116297	1.59398433408825	-3.61075669821755	0.000305304963501585	0.0049505258881028	0	46	FFPE-ATAC in FFPE kidney
peak_29214	chr13	40793927	40794444	6.0502575351508	-5.75548961116297	1.59398433408825	-3.61075669821755	0.000305304963501585	0.0049505258881028	1.5	110.5	FFPE-ATAC in FFPE kidney
peak_37408	chr14	78703505	78703966	6.0502575351508	-5.75548961116297	1.59398433408825	-3.61075669821755	0.000305304963501585	0.0049505258881028	0	98.5	FFPE-ATAC in FFPE kidney
peak_52733	chr17	84156856	84157165	6.0502575351508	-5.75548961116297	1.59398433408825	-3.61075669821755	0.000305304963501585	0.0049505258881028	0.5	65	FFPE-ATAC in FFPE kidney
peak_52848	chr17	85066032	85066421	6.0502575351508	-5.75548961116297	1.59398433408825	-3.61075669821755	0.000305304963501585	0.0049505258881028	1	84.5	FFPE-ATAC in FFPE kidney
peak_53249	chr17_random	28819	29463	6.0502575351508	-5.75548961116297	1.59398433408825	-3.61075669821755	0.000305304963501585	0.0049505258881028	0	136.5	FFPE-ATAC in FFPE kidney
peak_70831	chr3	25745575	25746256	6.0502575351508	-5.75548961116297	1.59398433408825	-3.61075669821755	0.000305304963501585	0.0049505258881028	2.5	145.5	FFPE-ATAC in FFPE kidney
peak_90081	chr5	123410152	123410597	6.0502575351508	-5.75548961116297	1.59398433408825	-3.61075669821755	0.000305304963501585	0.0049505258881028	2	95.5	FFPE-ATAC in FFPE kidney
peak_112720	chr9	15864678	15865106	6.0502575351508	-5.75548961116297	1.59398433408825	-3.61075669821755	0.000305304963501585	0.0049505258881028	0.5	89.5	FFPE-ATAC in FFPE kidney
peak_116106	chr9	78080783	78081342	6.0502575351508	-5.75548961116297	1.59398433408825	-3.61075669821755	0.000305304963501585	0.0049505258881028	0	118	FFPE-ATAC in FFPE kidney
peak_118834	chrX	3200934	3201155	6.0502575351508	-5.75548961116297	1.59398433408825	-3.61075669821755	0.000305304963501585	0.0049505258881028	0	47	FFPE-ATAC in FFPE kidney
peak_15696	chr11	18931053	18931391	6.05952089225378	-5.75712078735294	1.59515095222808	-3.6091385453593	0.000307215510544075	0.00496533107891703	0	70	FFPE-ATAC in FFPE kidney
peak_21012	chr11	103048605	103048980	6.05952089225378	-5.75712078735294	1.59515095222808	-3.6091385453593	0.000307215510544075	0.00496533107891703	1.5	78	FFPE-ATAC in FFPE kidney
peak_40315	chr15	42831880	42832281	6.05952089225378	-5.75712078735294	1.59515095222808	-3.6091385453593	0.000307215510544075	0.00496533107891703	1	84	FFPE-ATAC in FFPE kidney
peak_51661	chr17	64588924	64589252	6.05952089225378	-5.75712078735294	1.59515095222808	-3.6091385453593	0.000307215510544075	0.00496533107891703	0	66.5	FFPE-ATAC in FFPE kidney
peak_52486	chr17	80372045	80372636	6.05952089225378	-5.75712078735294	1.59515095222808	-3.6091385453593	0.000307215510544075	0.00496533107891703	0	122.5	FFPE-ATAC in FFPE kidney
peak_53264	chr17_random	345616	346022	6.05952089225378	-5.75712078735294	1.59515095222808	-3.6091385453593	0.000307215510544075	0.00496533107891703	0	84	FFPE-ATAC in FFPE kidney
peak_54276	chr18	29421307	29421670	6.05952089225378	-5.75712078735294	1.59515095222808	-3.6091385453593	0.000307215510544075	0.00496533107891703	0.5	75.5	FFPE-ATAC in FFPE kidney
peak_55536	chr18	56088115	56088451	6.05952089225378	-5.75712078735294	1.59515095222808	-3.6091385453593	0.000307215510544075	0.00496533107891703	1	70	FFPE-ATAC in FFPE kidney
peak_56498	chr18	71451131	71451722	6.05952089225378	-5.75712078735294	1.59515095222808	-3.6091385453593	0.000307215510544075	0.00496533107891703	1	126	FFPE-ATAC in FFPE kidney
peak_57068	chr18	82152235	82152580	6.05952089225378	-5.75712078735294	1.59515095222808	-3.6091385453593	0.000307215510544075	0.00496533107891703	0	72	FFPE-ATAC in FFPE kidney
peak_60914	chr1_random	1126338	1126575	6.05952089225378	-5.75712078735294	1.59515095222808	-3.6091385453593	0.000307215510544075	0.00496533107891703	0.5	49.5	FFPE-ATAC in FFPE kidney
peak_78267	chr4	46232044	46232713	6.05952089225378	-5.75712078735294	1.59515095222808	-3.6091385453593	0.000307215510544075	0.00496533107891703	2	141.5	FFPE-ATAC in FFPE kidney
peak_79024	chr4	61290534	61290799	6.05952089225378	-5.75712078735294	1.59515095222808	-3.6091385453593	0.000307215510544075	0.00496533107891703	0	56	FFPE-ATAC in FFPE kidney
peak_87279	chr5	73379786	73380143	6.05952089225378	-5.75712078735294	1.59515095222808	-3.6091385453593	0.000307215510544075	0.00496533107891703	0	72.5	FFPE-ATAC in FFPE kidney
peak_92061	chr5	152442632	152442848	6.05952089225378	-5.75712078735294	1.59515095222808	-3.6091385453593	0.000307215510544075	0.00496533107891703	0	45	FFPE-ATAC in FFPE kidney
peak_92990	chr6	30579025	30579409	6.05952089225378	-5.75712078735294	1.59515095222808	-3.6091385453593	0.000307215510544075	0.00496533107891703	0	79.5	FFPE-ATAC in FFPE kidney
peak_104149	chr7	125618049	125618249	6.05952089225378	-5.75712078735294	1.59515095222808	-3.6091385453593	0.000307215510544075	0.00496533107891703	0.5	40.5	FFPE-ATAC in FFPE kidney
peak_107012	chr8	27284923	27285462	6.05952089225378	-5.75712078735294	1.59515095222808	-3.6091385453593	0.000307215510544075	0.00496533107891703	1.5	114.5	FFPE-ATAC in FFPE kidney
peak_110604	chr8	110109364	110109631	6.05952089225378	-5.75712078735294	1.59515095222808	-3.6091385453593	0.000307215510544075	0.00496533107891703	0	57	FFPE-ATAC in FFPE kidney
peak_110731	chr8	113076590	113076923	6.05952089225378	-5.75712078735294	1.59515095222808	-3.6091385453593	0.000307215510544075	0.00496533107891703	0	70	FFPE-ATAC in FFPE kidney
peak_114025	chr9	45987813	45988060	6.05952089225378	-5.75712078735294	1.59515095222808	-3.6091385453593	0.000307215510544075	0.00496533107891703	0	50.5	FFPE-ATAC in FFPE kidney
peak_115857	chr9	73910797	73911352	6.05952089225378	-5.75712078735294	1.59515095222808	-3.6091385453593	0.000307215510544075	0.00496533107891703	2	118.5	FFPE-ATAC in FFPE kidney
peak_60906	chr1_random	993169	993630	6.0471697494498	-5.75494390640844	1.59523896055738	-3.60757482026245	0.000309072426518306	0.00499031484357436	0	102	FFPE-ATAC in FFPE kidney
peak_61990	chr2	25952109	25952389	6.0471697494498	-5.75494390640844	1.59523896055738	-3.60757482026245	0.000309072426518306	0.00499031484357436	0.5	59	FFPE-ATAC in FFPE kidney
peak_64769	chr2	75813241	75813465	6.0471697494498	-5.75494390640844	1.59523896055738	-3.60757482026245	0.000309072426518306	0.00499031484357436	0	47.5	FFPE-ATAC in FFPE kidney
peak_28520	chr13	25142151	25142637	10.5037902443105	-4.02191032283632	1.11559624203459	-3.60516661072762	0.000311952729522759	0.00502773198093028	4.5	166.5	FFPE-ATAC in FFPE kidney
peak_27794	chr13	6248580	6249116	6.06260867795477	-5.75767199514477	1.59720245509034	-3.60484794948496	0.000312335736741004	0.00503164345364212	1	111	FFPE-ATAC in FFPE kidney
peak_49433	chr17	26202554	26202782	6.06260867795477	-5.75767199514477	1.59720245509034	-3.60484794948496	0.000312335736741004	0.00503164345364212	0.5	47.5	FFPE-ATAC in FFPE kidney
peak_106326	chr8	12633301	12633650	6.06260867795477	-5.75767199514477	1.59720245509034	-3.60484794948496	0.000312335736741004	0.00503164345364212	0.5	72	FFPE-ATAC in FFPE kidney
peak_52580	chr17	81222618	81222858	10.4948638773358	-4.02179049376977	1.1159765472052	-3.60383065741099	0.000313561394693346	0.00504737518332917	3	81.5	FFPE-ATAC in FFPE kidney
peak_88540	chr5	103263149	103263612	10.4948638773358	-4.02179049376977	1.1159765472052	-3.60383065741099	0.000313561394693346	0.00504737518332917	8	160	FFPE-ATAC in FFPE kidney
peak_84871	chr5	14988553	14988834	10.6001380451495	-3.40624191451362	0.945511854862963	-3.60253750071415	0.000315125921296911	0.00507021307233569	3	96	FFPE-ATAC in FFPE kidney
peak_33432	chr13_random	132120	132327	6.04408196374881	-5.75439247737328	1.59733942327319	-3.60248572941476	0.000315188708726603	0.00507021307233569	0	44.5	FFPE-ATAC in FFPE kidney
peak_112301	chr8_random	163904	164104	6.04408196374881	-5.75439247737328	1.59733942327319	-3.60248572941476	0.000315188708726603	0.00507021307233569	0	43.5	FFPE-ATAC in FFPE kidney
peak_112327	chr8_random	735124	735468	13.0255900804944	-5.38420833790782	1.49555239032056	-3.60014692414336	0.000318037421525738	0.00510927727109221	2	153	FFPE-ATAC in FFPE kidney
peak_35223	chr14	37787670	37788290	10.6063136165514	-3.40683467515084	0.946362877078757	-3.5999242549191	0.000318309890076963	0.00511230327352569	7.5	204.5	FFPE-ATAC in FFPE kidney
peak_27722	chr13	4605204	4605412	13.0259270706226	-5.38463644536554	1.49608217171234	-3.59915821949978	0.00031924891692174	0.00512520907569938	1	90.5	FFPE-ATAC in FFPE kidney
peak_56221	chr18	66677938	66678204	11.10037919084	-3.02074340836815	0.842620889960746	-3.58493771559458	0.000337158658288358	0.00539010456814387	6	93.5	FFPE-ATAC in FFPE kidney
peak_84858	chr5	14947260	14947549	12.8164294290084	-5.36097503957293	1.49594079524722	-3.58368129046643	0.000338785430620615	0.00541326394426452	2.5	126	FFPE-ATAC in FFPE kidney
peak_106638	chr8	19856615	19856848	12.8099168674782	-5.3600803997236	1.4960434015601	-3.58283749932256	0.000339882058664501	0.00542650677429622	2	102.5	FFPE-ATAC in FFPE kidney
peak_54651	chr18	36682970	36683237	11.1062177721138	-3.02062145286777	0.843391261198848	-3.58151855708592	0.000341602868733962	0.00544968650062669	5.5	92.5	FFPE-ATAC in FFPE kidney
peak_2906	chr1	79746723	79747064	12.8284435816841	-5.36148776044859	1.49712736764693	-3.5811834559376	0.000342041368328552	0.00545596600177038	3	148	FFPE-ATAC in FFPE kidney
peak_109633	chr8	90482640	90483209	8.41748842832889	3.23729440915396	0.904676485905752	3.5784000795741	0.000345703985257938	0.00550139537425004	77.5	17.5	standard ATAC in FFPE kidney
peak_57735	chr19	7342163	7343003	8.42299001947446	3.23788373387542	0.905859025659607	3.57437928216008	0.000351059734125081	0.00557640474574433	114	26	standard ATAC in FFPE kidney
peak_111300	chr8	122357726	122358089	10.2884540214226	-3.99160571080814	1.11850469905116	-3.568698204124	0.000358759394711766	0.00568462963484522	5	123.5	FFPE-ATAC in FFPE kidney
peak_118762	chrUn_random	5245184	5245501	12.6100195730952	-5.33716546245729	1.49665222476926	-3.5660692404878	0.000362375666874663	0.00568462963484522	1	138	FFPE-ATAC in FFPE kidney
peak_2469	chr1	72742685	72743241	5.85311103634056	-5.70740480674281	1.6006364276156	-3.56570968164513	0.00036287289951616	0.00568462963484522	1	114.5	FFPE-ATAC in FFPE kidney
peak_5347	chr1	140597180	140597719	5.85311103634056	-5.70740480674281	1.6006364276156	-3.56570968164513	0.00036287289951616	0.00568462963484522	1.5	110.5	FFPE-ATAC in FFPE kidney
peak_6693	chr1	170510499	170510749	5.85311103634056	-5.70740480674281	1.6006364276156	-3.56570968164513	0.00036287289951616	0.00568462963484522	0	51	FFPE-ATAC in FFPE kidney
peak_9126	chr10	20077562	20077849	5.85311103634056	-5.70740480674281	1.6006364276156	-3.56570968164513	0.00036287289951616	0.00568462963484522	0	59	FFPE-ATAC in FFPE kidney
peak_11087	chr10	64980667	64981121	5.85311103634056	-5.70740480674281	1.6006364276156	-3.56570968164513	0.00036287289951616	0.00568462963484522	1	92.5	FFPE-ATAC in FFPE kidney
peak_12416	chr10	82111868	82112890	5.85311103634056	-5.70740480674281	1.6006364276156	-3.56570968164513	0.00036287289951616	0.00568462963484522	0	205	FFPE-ATAC in FFPE kidney
peak_12887	chr10	89496876	89497119	5.85311103634056	-5.70740480674281	1.6006364276156	-3.56570968164513	0.00036287289951616	0.00568462963484522	0	48.5	FFPE-ATAC in FFPE kidney
peak_16404	chr11	34120317	34120783	5.85311103634056	-5.70740480674281	1.6006364276156	-3.56570968164513	0.00036287289951616	0.00568462963484522	1.5	93.5	FFPE-ATAC in FFPE kidney
peak_18160	chr11	69076779	69077167	5.85311103634056	-5.70740480674281	1.6006364276156	-3.56570968164513	0.00036287289951616	0.00568462963484522	1.5	79	FFPE-ATAC in FFPE kidney
peak_27090	chr12	112799037	112799728	5.85311103634056	-5.70740480674281	1.6006364276156	-3.56570968164513	0.00036287289951616	0.00568462963484522	3	142	FFPE-ATAC in FFPE kidney
peak_30463	chr13	57811719	57812076	5.85311103634056	-5.70740480674281	1.6006364276156	-3.56570968164513	0.00036287289951616	0.00568462963484522	1	73	FFPE-ATAC in FFPE kidney
peak_32797	chr13	109527009	109527209	5.85311103634056	-5.70740480674281	1.6006364276156	-3.56570968164513	0.00036287289951616	0.00568462963484522	0	41.5	FFPE-ATAC in FFPE kidney
peak_39035	chr15	8663172	8663393	5.85311103634056	-5.70740480674281	1.6006364276156	-3.56570968164513	0.00036287289951616	0.00568462963484522	0	45	FFPE-ATAC in FFPE kidney
peak_39093	chr15	9520205	9520496	5.85311103634056	-5.70740480674281	1.6006364276156	-3.56570968164513	0.00036287289951616	0.00568462963484522	0	60	FFPE-ATAC in FFPE kidney
peak_42650	chr15	89689017	89689337	5.85311103634056	-5.70740480674281	1.6006364276156	-3.56570968164513	0.00036287289951616	0.00568462963484522	0	65	FFPE-ATAC in FFPE kidney
peak_44852	chr16	22659893	22660093	5.85311103634056	-5.70740480674281	1.6006364276156	-3.56570968164513	0.00036287289951616	0.00568462963484522	0	41	FFPE-ATAC in FFPE kidney
peak_45898	chr16	36323346	36323691	5.85311103634056	-5.70740480674281	1.6006364276156	-3.56570968164513	0.00036287289951616	0.00568462963484522	0	68.5	FFPE-ATAC in FFPE kidney
peak_47177	chr16	78000242	78000637	5.85311103634056	-5.70740480674281	1.6006364276156	-3.56570968164513	0.00036287289951616	0.00568462963484522	1	78.5	FFPE-ATAC in FFPE kidney
peak_47238	chr16	84370309	84370517	5.85311103634056	-5.70740480674281	1.6006364276156	-3.56570968164513	0.00036287289951616	0.00568462963484522	0	42.5	FFPE-ATAC in FFPE kidney
peak_47694	chr16	91807686	91808012	5.85311103634056	-5.70740480674281	1.6006364276156	-3.56570968164513	0.00036287289951616	0.00568462963484522	0	66.5	FFPE-ATAC in FFPE kidney
peak_48407	chr17	5892890	5893457	5.85311103634056	-5.70740480674281	1.6006364276156	-3.56570968164513	0.00036287289951616	0.00568462963484522	0	118.5	FFPE-ATAC in FFPE kidney
peak_49988	chr17	31568689	31569423	5.85311103634056	-5.70740480674281	1.6006364276156	-3.56570968164513	0.00036287289951616	0.00568462963484522	3.5	151	FFPE-ATAC in FFPE kidney
peak_53252	chr17_random	273699	274124	5.85311103634056	-5.70740480674281	1.6006364276156	-3.56570968164513	0.00036287289951616	0.00568462963484522	0	85.5	FFPE-ATAC in FFPE kidney
peak_58732	chr19	27643396	27643729	5.85311103634056	-5.70740480674281	1.6006364276156	-3.56570968164513	0.00036287289951616	0.00568462963484522	1	68	FFPE-ATAC in FFPE kidney
peak_62494	chr2	30864218	30864743	5.85311103634056	-5.70740480674281	1.6006364276156	-3.56570968164513	0.00036287289951616	0.00568462963484522	1.5	106	FFPE-ATAC in FFPE kidney
peak_63606	chr2	56381500	56381932	5.85311103634056	-5.70740480674281	1.6006364276156	-3.56570968164513	0.00036287289951616	0.00568462963484522	0	88	FFPE-ATAC in FFPE kidney
peak_69981	chr2	174967368	174968106	5.85311103634056	-5.70740480674281	1.6006364276156	-3.56570968164513	0.00036287289951616	0.00568462963484522	0	154.5	FFPE-ATAC in FFPE kidney
peak_72251	chr3	60297482	60297966	5.85311103634056	-5.70740480674281	1.6006364276156	-3.56570968164513	0.00036287289951616	0.00568462963484522	0	98	FFPE-ATAC in FFPE kidney
peak_72645	chr3	70338368	70338720	5.85311103634056	-5.70740480674281	1.6006364276156	-3.56570968164513	0.00036287289951616	0.00568462963484522	0	71	FFPE-ATAC in FFPE kidney
peak_74058	chr3	98328359	98329254	5.85311103634056	-5.70740480674281	1.6006364276156	-3.56570968164513	0.00036287289951616	0.00568462963484522	0	182.5	FFPE-ATAC in FFPE kidney
peak_77809	chr4	39557903	39558467	5.85311103634056	-5.70740480674281	1.6006364276156	-3.56570968164513	0.00036287289951616	0.00568462963484522	0	116.5	FFPE-ATAC in FFPE kidney
peak_78036	chr4	43484736	43485082	5.85311103634056	-5.70740480674281	1.6006364276156	-3.56570968164513	0.00036287289951616	0.00568462963484522	0.5	71	FFPE-ATAC in FFPE kidney
peak_78379	chr4	48398371	48398890	5.85311103634056	-5.70740480674281	1.6006364276156	-3.56570968164513	0.00036287289951616	0.00568462963484522	2	105.5	FFPE-ATAC in FFPE kidney
peak_78734	chr4	57378133	57378534	5.85311103634056	-5.70740480674281	1.6006364276156	-3.56570968164513	0.00036287289951616	0.00568462963484522	0	84	FFPE-ATAC in FFPE kidney
peak_79014	chr4	61133596	61133910	5.85311103634056	-5.70740480674281	1.6006364276156	-3.56570968164513	0.00036287289951616	0.00568462963484522	0	64	FFPE-ATAC in FFPE kidney
peak_79031	chr4	61383139	61383352	5.85311103634056	-5.70740480674281	1.6006364276156	-3.56570968164513	0.00036287289951616	0.00568462963484522	0	44.5	FFPE-ATAC in FFPE kidney
peak_79559	chr4	82382021	82382374	5.85311103634056	-5.70740480674281	1.6006364276156	-3.56570968164513	0.00036287289951616	0.00568462963484522	0	73	FFPE-ATAC in FFPE kidney
peak_83505	chr4	142793352	142793814	5.85311103634056	-5.70740480674281	1.6006364276156	-3.56570968164513	0.00036287289951616	0.00568462963484522	1	95	FFPE-ATAC in FFPE kidney
peak_88562	chr5	103779931	103780131	5.85311103634056	-5.70740480674281	1.6006364276156	-3.56570968164513	0.00036287289951616	0.00568462963484522	0	40.5	FFPE-ATAC in FFPE kidney
peak_92035	chr5	151923137	151923492	5.85311103634056	-5.70740480674281	1.6006364276156	-3.56570968164513	0.00036287289951616	0.00568462963484522	1	74	FFPE-ATAC in FFPE kidney
peak_93193	chr6	34150483	34150866	5.85311103634056	-5.70740480674281	1.6006364276156	-3.56570968164513	0.00036287289951616	0.00568462963484522	0	78	FFPE-ATAC in FFPE kidney
peak_95152	chr6	83756098	83756337	5.85311103634056	-5.70740480674281	1.6006364276156	-3.56570968164513	0.00036287289951616	0.00568462963484522	0	48.5	FFPE-ATAC in FFPE kidney
peak_97665	chr6	128702673	128703133	5.85311103634056	-5.70740480674281	1.6006364276156	-3.56570968164513	0.00036287289951616	0.00568462963484522	0	93	FFPE-ATAC in FFPE kidney
peak_97909	chr6	134919828	134920797	5.85311103634056	-5.70740480674281	1.6006364276156	-3.56570968164513	0.00036287289951616	0.00568462963484522	0	198.5	FFPE-ATAC in FFPE kidney
peak_104550	chr7	133291709	133291923	5.85311103634056	-5.70740480674281	1.6006364276156	-3.56570968164513	0.00036287289951616	0.00568462963484522	0	43	FFPE-ATAC in FFPE kidney
peak_106003	chr8	4753668	4754104	5.85311103634056	-5.70740480674281	1.6006364276156	-3.56570968164513	0.00036287289951616	0.00568462963484522	0.5	89	FFPE-ATAC in FFPE kidney
peak_112073	chr8	129157591	129158111	5.85311103634056	-5.70740480674281	1.6006364276156	-3.56570968164513	0.00036287289951616	0.00568462963484522	2	104	FFPE-ATAC in FFPE kidney
peak_113576	chr9	40455081	40455281	5.85311103634056	-5.70740480674281	1.6006364276156	-3.56570968164513	0.00036287289951616	0.00568462963484522	0	39.5	FFPE-ATAC in FFPE kidney
peak_114740	chr9	59481064	59481524	5.85311103634056	-5.70740480674281	1.6006364276156	-3.56570968164513	0.00036287289951616	0.00568462963484522	1	94.5	FFPE-ATAC in FFPE kidney
peak_114796	chr9	60239321	60239552	5.85311103634056	-5.70740480674281	1.6006364276156	-3.56570968164513	0.00036287289951616	0.00568462963484522	0	47.5	FFPE-ATAC in FFPE kidney
peak_118624	chrUn_random	2966795	2967058	5.85311103634056	-5.70740480674281	1.6006364276156	-3.56570968164513	0.00036287289951616	0.00568462963484522	0	54.5	FFPE-ATAC in FFPE kidney
peak_119788	chrX	66146531	66146880	5.85311103634056	-5.70740480674281	1.6006364276156	-3.56570968164513	0.00036287289951616	0.00568462963484522	0	70.5	FFPE-ATAC in FFPE kidney
peak_121488	chrY	1512475	1512681	5.85311103634056	-5.70740480674281	1.6006364276156	-3.56570968164513	0.00036287289951616	0.00568462963484522	0	42	FFPE-ATAC in FFPE kidney
peak_121510	chrY_random	10299334	10299534	5.85311103634056	-5.70740480674281	1.6006364276156	-3.56570968164513	0.00036287289951616	0.00568462963484522	0	40.5	FFPE-ATAC in FFPE kidney
peak_121531	chrY_random	28073266	28073476	5.85311103634056	-5.70740480674281	1.6006364276156	-3.56570968164513	0.00036287289951616	0.00568462963484522	0	43.5	FFPE-ATAC in FFPE kidney
peak_121559	chrY_random	52309381	52309581	5.85311103634056	-5.70740480674281	1.6006364276156	-3.56570968164513	0.00036287289951616	0.00568462963484522	0	40.5	FFPE-ATAC in FFPE kidney
peak_121561	chrY_random	55609810	55610010	5.85311103634056	-5.70740480674281	1.6006364276156	-3.56570968164513	0.00036287289951616	0.00568462963484522	0	40.5	FFPE-ATAC in FFPE kidney
peak_4418	chr1	125843974	125844295	5.85002325063957	-5.706841307902	1.60063166173044	-3.56536825076442	0.000363345653522915	0.00568462963484522	0	66.5	FFPE-ATAC in FFPE kidney
peak_11240	chr10	67621691	67622009	5.85002325063957	-5.706841307902	1.60063166173044	-3.56536825076442	0.000363345653522915	0.00568462963484522	0.5	66	FFPE-ATAC in FFPE kidney
peak_14200	chr10	117349804	117350707	5.85002325063957	-5.706841307902	1.60063166173044	-3.56536825076442	0.000363345653522915	0.00568462963484522	0.5	187	FFPE-ATAC in FFPE kidney
peak_19834	chr11	88996374	88997155	5.85002325063957	-5.706841307902	1.60063166173044	-3.56536825076442	0.000363345653522915	0.00568462963484522	1	159.5	FFPE-ATAC in FFPE kidney
peak_22345	chr11	119177227	119178030	5.85002325063957	-5.706841307902	1.60063166173044	-3.56536825076442	0.000363345653522915	0.00568462963484522	2	169.5	FFPE-ATAC in FFPE kidney
peak_23378	chr12	22375110	22375448	5.85002325063957	-5.706841307902	1.60063166173044	-3.56536825076442	0.000363345653522915	0.00568462963484522	0	69	FFPE-ATAC in FFPE kidney
peak_24632	chr12	70387476	70387881	5.85002325063957	-5.706841307902	1.60063166173044	-3.56536825076442	0.000363345653522915	0.00568462963484522	0.5	82.5	FFPE-ATAC in FFPE kidney
peak_29193	chr13	39255170	39255612	5.85002325063957	-5.706841307902	1.60063166173044	-3.56536825076442	0.000363345653522915	0.00568462963484522	2	90.5	FFPE-ATAC in FFPE kidney
peak_33212	chr13	114513529	114514104	5.85002325063957	-5.706841307902	1.60063166173044	-3.56536825076442	0.000363345653522915	0.00568462963484522	0	116.5	FFPE-ATAC in FFPE kidney
peak_33939	chr14	17678035	17678641	5.85002325063957	-5.706841307902	1.60063166173044	-3.56536825076442	0.000363345653522915	0.00568462963484522	0	124.5	FFPE-ATAC in FFPE kidney
peak_48531	chr17	8236176	8236539	5.85002325063957	-5.706841307902	1.60063166173044	-3.56536825076442	0.000363345653522915	0.00568462963484522	1	75.5	FFPE-ATAC in FFPE kidney
peak_63618	chr2	57075314	57075768	5.85002325063957	-5.706841307902	1.60063166173044	-3.56536825076442	0.000363345653522915	0.00568462963484522	0	92.5	FFPE-ATAC in FFPE kidney
peak_73039	chr3	84761003	84761295	5.85002325063957	-5.706841307902	1.60063166173044	-3.56536825076442	0.000363345653522915	0.00568462963484522	0.5	59.5	FFPE-ATAC in FFPE kidney
peak_74051	chr3	98274892	98275809	5.85002325063957	-5.706841307902	1.60063166173044	-3.56536825076442	0.000363345653522915	0.00568462963484522	0	192	FFPE-ATAC in FFPE kidney
peak_79025	chr4	61291057	61292366	5.85002325063957	-5.706841307902	1.60063166173044	-3.56536825076442	0.000363345653522915	0.00568462963484522	3	271.5	FFPE-ATAC in FFPE kidney
peak_79442	chr4	77980081	77980302	5.85002325063957	-5.706841307902	1.60063166173044	-3.56536825076442	0.000363345653522915	0.00568462963484522	0	45	FFPE-ATAC in FFPE kidney
peak_81577	chr4	120435397	120435734	5.85002325063957	-5.706841307902	1.60063166173044	-3.56536825076442	0.000363345653522915	0.00568462963484522	1.5	70.5	FFPE-ATAC in FFPE kidney
peak_86436	chr5	50014744	50015135	5.85002325063957	-5.706841307902	1.60063166173044	-3.56536825076442	0.000363345653522915	0.00568462963484522	0	81.5	FFPE-ATAC in FFPE kidney
peak_93198	chr6	34200836	34201285	5.85002325063957	-5.706841307902	1.60063166173044	-3.56536825076442	0.000363345653522915	0.00568462963484522	1	94.5	FFPE-ATAC in FFPE kidney
peak_100439	chr7	48319593	48320158	5.85002325063957	-5.706841307902	1.60063166173044	-3.56536825076442	0.000363345653522915	0.00568462963484522	1	113.5	FFPE-ATAC in FFPE kidney
peak_106294	chr8	11850464	11851027	5.85002325063957	-5.706841307902	1.60063166173044	-3.56536825076442	0.000363345653522915	0.00568462963484522	0	115.5	FFPE-ATAC in FFPE kidney
peak_112990	chr9	24125135	24125470	5.85002325063957	-5.706841307902	1.60063166173044	-3.56536825076442	0.000363345653522915	0.00568462963484522	0	71	FFPE-ATAC in FFPE kidney
peak_115045	chr9	63323792	63324301	5.85002325063957	-5.706841307902	1.60063166173044	-3.56536825076442	0.000363345653522915	0.00568462963484522	1	106	FFPE-ATAC in FFPE kidney
peak_117138	chr9	103982623	103982981	5.85002325063957	-5.706841307902	1.60063166173044	-3.56536825076442	0.000363345653522915	0.00568462963484522	1	71.5	FFPE-ATAC in FFPE kidney
peak_120196	chrX	94262720	94262940	5.85002325063957	-5.706841307902	1.60063166173044	-3.56536825076442	0.000363345653522915	0.00568462963484522	0	45.5	FFPE-ATAC in FFPE kidney
peak_535	chr1	21622759	21623094	5.85619882204155	-5.70796982099774	1.60152251447547	-3.56408965181935	0.000365121155842778	0.00568462963484522	1	67.5	FFPE-ATAC in FFPE kidney
peak_2884	chr1	78943048	78943398	5.85619882204155	-5.70796982099774	1.60152251447547	-3.56408965181935	0.000365121155842778	0.00568462963484522	0	69.5	FFPE-ATAC in FFPE kidney
peak_5479	chr1	148113023	148113382	5.85619882204155	-5.70796982099774	1.60152251447547	-3.56408965181935	0.000365121155842778	0.00568462963484522	0.5	71.5	FFPE-ATAC in FFPE kidney
peak_6585	chr1	168365851	168366084	5.85619882204155	-5.70796982099774	1.60152251447547	-3.56408965181935	0.000365121155842778	0.00568462963484522	0	47	FFPE-ATAC in FFPE kidney
peak_10310	chr10	45115261	45116090	5.85619882204155	-5.70796982099774	1.60152251447547	-3.56408965181935	0.000365121155842778	0.00568462963484522	1.5	167	FFPE-ATAC in FFPE kidney
peak_11101	chr10	65953240	65953599	5.85619882204155	-5.70796982099774	1.60152251447547	-3.56408965181935	0.000365121155842778	0.00568462963484522	1	71.5	FFPE-ATAC in FFPE kidney
peak_11322	chr10	68416821	68417106	5.85619882204155	-5.70796982099774	1.60152251447547	-3.56408965181935	0.000365121155842778	0.00568462963484522	0	56.5	FFPE-ATAC in FFPE kidney
peak_12538	chr10	83753596	83754158	5.85619882204155	-5.70796982099774	1.60152251447547	-3.56408965181935	0.000365121155842778	0.00568462963484522	0	116	FFPE-ATAC in FFPE kidney
peak_13429	chr10	98214700	98215093	5.85619882204155	-5.70796982099774	1.60152251447547	-3.56408965181935	0.000365121155842778	0.00568462963484522	0	79	FFPE-ATAC in FFPE kidney
peak_17488	chr11	58707320	58707635	5.85619882204155	-5.70796982099774	1.60152251447547	-3.56408965181935	0.000365121155842778	0.00568462963484522	0	63.5	FFPE-ATAC in FFPE kidney
peak_18746	chr11	76174487	76174788	5.85619882204155	-5.70796982099774	1.60152251447547	-3.56408965181935	0.000365121155842778	0.00568462963484522	0	62	FFPE-ATAC in FFPE kidney
peak_22434	chr11	120057619	120057852	5.85619882204155	-5.70796982099774	1.60152251447547	-3.56408965181935	0.000365121155842778	0.00568462963484522	0	46.5	FFPE-ATAC in FFPE kidney
peak_22629	chr12	3167273	3167652	5.85619882204155	-5.70796982099774	1.60152251447547	-3.56408965181935	0.000365121155842778	0.00568462963484522	0	77	FFPE-ATAC in FFPE kidney
peak_27258	chr12	114175413	114175633	5.85619882204155	-5.70796982099774	1.60152251447547	-3.56408965181935	0.000365121155842778	0.00568462963484522	0	43.5	FFPE-ATAC in FFPE kidney
peak_33490	chr14	4924958	4925371	5.85619882204155	-5.70796982099774	1.60152251447547	-3.56408965181935	0.000365121155842778	0.00568462963484522	0	82.5	FFPE-ATAC in FFPE kidney
peak_33982	chr14	18698533	18699036	5.85619882204155	-5.70796982099774	1.60152251447547	-3.56408965181935	0.000365121155842778	0.00568462963484522	1	102	FFPE-ATAC in FFPE kidney
peak_35684	chr14	49269023	49269397	5.85619882204155	-5.70796982099774	1.60152251447547	-3.56408965181935	0.000365121155842778	0.00568462963484522	0	76.5	FFPE-ATAC in FFPE kidney
peak_38733	chr14	123790539	123790789	5.85619882204155	-5.70796982099774	1.60152251447547	-3.56408965181935	0.000365121155842778	0.00568462963484522	0.5	52	FFPE-ATAC in FFPE kidney
peak_43966	chr16	7376208	7376561	5.85619882204155	-5.70796982099774	1.60152251447547	-3.56408965181935	0.000365121155842778	0.00568462963484522	1	73.5	FFPE-ATAC in FFPE kidney
peak_43979	chr16	8391934	8392293	5.85619882204155	-5.70796982099774	1.60152251447547	-3.56408965181935	0.000365121155842778	0.00568462963484522	0	73	FFPE-ATAC in FFPE kidney
peak_48527	chr17	8145071	8145439	5.85619882204155	-5.70796982099774	1.60152251447547	-3.56408965181935	0.000365121155842778	0.00568462963484522	0	75	FFPE-ATAC in FFPE kidney
peak_56977	chr18	80413052	80413299	5.85619882204155	-5.70796982099774	1.60152251447547	-3.56408965181935	0.000365121155842778	0.00568462963484522	0	51	FFPE-ATAC in FFPE kidney
peak_60217	chr19	52795005	52795566	5.85619882204155	-5.70796982099774	1.60152251447547	-3.56408965181935	0.000365121155842778	0.00568462963484522	1	113.5	FFPE-ATAC in FFPE kidney
peak_68586	chr2	156400488	156400847	5.85619882204155	-5.70796982099774	1.60152251447547	-3.56408965181935	0.000365121155842778	0.00568462963484522	0.5	71.5	FFPE-ATAC in FFPE kidney
peak_71790	chr3	52060563	52060888	5.85619882204155	-5.70796982099774	1.60152251447547	-3.56408965181935	0.000365121155842778	0.00568462963484522	1	65.5	FFPE-ATAC in FFPE kidney
peak_73313	chr3	88591987	88592277	5.85619882204155	-5.70796982099774	1.60152251447547	-3.56408965181935	0.000365121155842778	0.00568462963484522	0	59	FFPE-ATAC in FFPE kidney
peak_74360	chr3	103833150	103833614	5.85619882204155	-5.70796982099774	1.60152251447547	-3.56408965181935	0.000365121155842778	0.00568462963484522	1	94	FFPE-ATAC in FFPE kidney
peak_79884	chr4	89054109	89054679	5.85619882204155	-5.70796982099774	1.60152251447547	-3.56408965181935	0.000365121155842778	0.00568462963484522	1	116.5	FFPE-ATAC in FFPE kidney
peak_83608	chr4	145595254	145595536	5.85619882204155	-5.70796982099774	1.60152251447547	-3.56408965181935	0.000365121155842778	0.00568462963484522	0	57	FFPE-ATAC in FFPE kidney
peak_87198	chr5	70083145	70083567	5.85619882204155	-5.70796982099774	1.60152251447547	-3.56408965181935	0.000365121155842778	0.00568462963484522	0	84	FFPE-ATAC in FFPE kidney
peak_92239	chr6	6912333	6913008	5.85619882204155	-5.70796982099774	1.60152251447547	-3.56408965181935	0.000365121155842778	0.00568462963484522	2	139	FFPE-ATAC in FFPE kidney
peak_92850	chr6	28980596	28981102	5.85619882204155	-5.70796982099774	1.60152251447547	-3.56408965181935	0.000365121155842778	0.00568462963484522	1.5	101.5	FFPE-ATAC in FFPE kidney
peak_93657	chr6	43756537	43756740	5.85619882204155	-5.70796982099774	1.60152251447547	-3.56408965181935	0.000365121155842778	0.00568462963484522	0	40	FFPE-ATAC in FFPE kidney
peak_94048	chr6	52030095	52030876	5.85619882204155	-5.70796982099774	1.60152251447547	-3.56408965181935	0.000365121155842778	0.00568462963484522	2.5	157	FFPE-ATAC in FFPE kidney
peak_97494	chr6	125682295	125682941	5.85619882204155	-5.70796982099774	1.60152251447547	-3.56408965181935	0.000365121155842778	0.00568462963484522	0	130	FFPE-ATAC in FFPE kidney
peak_100384	chr7	46597377	46597647	5.85619882204155	-5.70796982099774	1.60152251447547	-3.56408965181935	0.000365121155842778	0.00568462963484522	0	55	FFPE-ATAC in FFPE kidney
peak_103767	chr7	119785850	119786050	5.85619882204155	-5.70796982099774	1.60152251447547	-3.56408965181935	0.000365121155842778	0.00568462963484522	0	40	FFPE-ATAC in FFPE kidney
peak_107521	chr8	40649008	40649373	5.85619882204155	-5.70796982099774	1.60152251447547	-3.56408965181935	0.000365121155842778	0.00568462963484522	1	75	FFPE-ATAC in FFPE kidney
peak_112998	chr9	24549422	24549628	5.85619882204155	-5.70796982099774	1.60152251447547	-3.56408965181935	0.000365121155842778	0.00568462963484522	0	41.5	FFPE-ATAC in FFPE kidney
peak_114135	chr9	49331520	49331738	5.85619882204155	-5.70796982099774	1.60152251447547	-3.56408965181935	0.000365121155842778	0.00568462963484522	0	44	FFPE-ATAC in FFPE kidney
peak_114406	chr9	54680228	54680434	5.85619882204155	-5.70796982099774	1.60152251447547	-3.56408965181935	0.000365121155842778	0.00568462963484522	0	40.5	FFPE-ATAC in FFPE kidney
peak_121499	chrY_random	5826884	5827212	5.85619882204155	-5.70796982099774	1.60152251447547	-3.56408965181935	0.000365121155842778	0.00568462963484522	0	65.5	FFPE-ATAC in FFPE kidney
peak_3158	chr1	87378489	87378694	5.84693546493857	-5.70627631843529	1.60150902231759	-3.56306223625113	0.000366553731779887	0.00569599103286338	0	42.5	FFPE-ATAC in FFPE kidney
peak_8385	chr10	5264292	5264492	5.84693546493857	-5.70627631843529	1.60150902231759	-3.56306223625113	0.000366553731779887	0.00569599103286338	0	42	FFPE-ATAC in FFPE kidney
peak_9545	chr10	26614415	26614615	5.84693546493857	-5.70627631843529	1.60150902231759	-3.56306223625113	0.000366553731779887	0.00569599103286338	0	40.5	FFPE-ATAC in FFPE kidney
peak_9986	chr10	41164810	41165110	5.84693546493857	-5.70627631843529	1.60150902231759	-3.56306223625113	0.000366553731779887	0.00569599103286338	0	61	FFPE-ATAC in FFPE kidney
peak_15360	chr11	6657923	6658303	5.84693546493857	-5.70627631843529	1.60150902231759	-3.56306223625113	0.000366553731779887	0.00569599103286338	0	78	FFPE-ATAC in FFPE kidney
peak_38106	chr14	106730552	106730895	5.84693546493857	-5.70627631843529	1.60150902231759	-3.56306223625113	0.000366553731779887	0.00569599103286338	0	71	FFPE-ATAC in FFPE kidney
peak_48397	chr17	5818934	5819156	5.84693546493857	-5.70627631843529	1.60150902231759	-3.56306223625113	0.000366553731779887	0.00569599103286338	0	46.5	FFPE-ATAC in FFPE kidney
peak_55578	chr18	56841982	56842356	5.84693546493857	-5.70627631843529	1.60150902231759	-3.56306223625113	0.000366553731779887	0.00569599103286338	0	77	FFPE-ATAC in FFPE kidney
peak_118718	chrUn_random	4739853	4740816	5.84693546493857	-5.70627631843529	1.60150902231759	-3.56306223625113	0.000366553731779887	0.00569599103286338	1	197	FFPE-ATAC in FFPE kidney
peak_120179	chrX	93238440	93238943	5.84693546493857	-5.70627631843529	1.60150902231759	-3.56306223625113	0.000366553731779887	0.00569599103286338	2.5	105.5	FFPE-ATAC in FFPE kidney
peak_9974	chr10	40842027	40842376	5.85928660774255	-5.70853934357353	1.60330428254607	-3.56048406139619	0.00037017178070332	0.00573900807925244	0	70.5	FFPE-ATAC in FFPE kidney
peak_29894	chr13	49248592	49248837	5.85928660774255	-5.70853934357353	1.60330428254607	-3.56048406139619	0.00037017178070332	0.00573900807925244	0	50	FFPE-ATAC in FFPE kidney
peak_47433	chr16	87509493	87509804	5.85928660774255	-5.70853934357353	1.60330428254607	-3.56048406139619	0.00037017178070332	0.00573900807925244	0	62	FFPE-ATAC in FFPE kidney
peak_56898	chr18	78552374	78552677	5.85928660774255	-5.70853934357353	1.60330428254607	-3.56048406139619	0.00037017178070332	0.00573900807925244	0	61	FFPE-ATAC in FFPE kidney
peak_101524	chr7	77596956	77597184	5.85928660774255	-5.70853934357353	1.60330428254607	-3.56048406139619	0.00037017178070332	0.00573900807925244	0	45.5	FFPE-ATAC in FFPE kidney
peak_105763	chr7	151071867	151072126	5.85928660774255	-5.70853934357353	1.60330428254607	-3.56048406139619	0.00037017178070332	0.00573900807925244	0	50.5	FFPE-ATAC in FFPE kidney
peak_108186	chr8	63380643	63381025	5.85928660774255	-5.70853934357353	1.60330428254607	-3.56048406139619	0.00037017178070332	0.00573900807925244	1	77	FFPE-ATAC in FFPE kidney
peak_121505	chrY_random	7453071	7453280	5.85928660774255	-5.70853934357353	1.60330428254607	-3.56048406139619	0.00037017178070332	0.00573900807925244	0	42	FFPE-ATAC in FFPE kidney
peak_25461	chr12	81207125	81207466	10.3971529650654	-3.37646702249877	0.948440871065704	-3.56001847400865	0.000370828705334075	0.00574712987746094	4.5	114.5	FFPE-ATAC in FFPE kidney
peak_43874	chr16	4935496	4935737	10.3999037606382	-3.37601441160792	0.948315388016983	-3.56001226413449	0.000370837474571449	0.00574712987746094	4.5	80	FFPE-ATAC in FFPE kidney
peak_15970	chr11	22739681	22739911	10.3968159749372	-3.37571124938404	0.948282798919747	-3.55981491305077	0.000371116263748849	0.00575027749295116	4.5	77	FFPE-ATAC in FFPE kidney
peak_44712	chr16	20732989	20733419	7.90557012009076	3.59349689307579	1.00946551834612	3.55980152641894	0.000371135181547949	0.00575027749295116	58	8.5	standard ATAC in FFPE kidney
peak_24654	chr12	70560706	70560934	5.84384767923758	-5.70570683011753	1.60328448122317	-3.55876134082241	0.000372607916886111	0.00576868425985012	0	48	FFPE-ATAC in FFPE kidney
peak_115515	chr9	68967980	68968190	5.84384767923758	-5.70570683011753	1.60328448122317	-3.55876134082241	0.000372607916886111	0.00576868425985012	0.5	44.5	FFPE-ATAC in FFPE kidney
peak_118789	chrUn_random	5484888	5485121	5.84384767923758	-5.70570683011753	1.60328448122317	-3.55876134082241	0.000372607916886111	0.00576868425985012	0	49	FFPE-ATAC in FFPE kidney
peak_107778	chr8	47566465	47567168	10.4029915463392	-3.37631752131444	0.948757206387609	-3.55867391423541	0.000372731947421612	0.00576986966208594	12.5	228	FFPE-ATAC in FFPE kidney
peak_100448	chr7	48448382	48449142	10.4033285364674	-3.37708096707967	0.949739081999711	-3.55579867258816	0.000376832573397014	0.00582815202957183	15	248	FFPE-ATAC in FFPE kidney
peak_108043	chr8	56206575	56207077	12.4036097171819	-5.3129569258681	1.4977738120548	-3.54723582633565	0.000389295952342763	0.00599877971233307	4	215.5	FFPE-ATAC in FFPE kidney
peak_53075	chr17	87627633	87628032	5.86546217914454	-5.70970335585452	1.6097256630862	-3.54700399377852	0.000389638684582005	0.00600177864324973	0.5	80	FFPE-ATAC in FFPE kidney
peak_38329	chr14	119201008	119202005	12.4190486456869	-5.31416700929738	1.49831181865336	-3.54676973320119	0.000389985292705868	0.00600635653395365	5.5	422	FFPE-ATAC in FFPE kidney
peak_89377	chr5	115218871	115219080	5.83767210783559	-5.70454286643342	1.60966292296482	-3.54393630184776	0.000394200472543386	0.0060597605265888	0	44	FFPE-ATAC in FFPE kidney
peak_84873	chr5	14995178	14996440	10.0940583181851	-3.96120514260218	1.11942803866864	-3.53859739596423	0.000402258855625758	0.00616959317755357	8	418	FFPE-ATAC in FFPE kidney
peak_9906	chr10	39812208	39812504	10.0909705324841	-3.96089747047808	1.11940143689468	-3.53840663405433	0.000402549613767655	0.00617327377924199	3.5	97.5	FFPE-ATAC in FFPE kidney
peak_15971	chr11	22741806	22742082	10.0971461038861	-3.96151371145401	1.11981172071298	-3.53766051754819	0.000403688726762934	0.00618918102915996	3	90	FFPE-ATAC in FFPE kidney
peak_84865	chr5	14973380	14973581	10.0971461038861	-3.96151371145401	1.11981172071298	-3.53766051754819	0.000403688726762934	0.00618918102915996	2	65.5	FFPE-ATAC in FFPE kidney
peak_44162	chr16	11332467	11332723	10.1002338895871	-3.96182467159191	1.12055598986938	-3.53558832169887	0.000406868210015261	0.0062336660750044	2.5	83.5	FFPE-ATAC in FFPE kidney
peak_73269	chr3	88302032	88302454	10.0943953083133	-3.96201487608906	1.12138727149495	-3.53313701412642	0.000410659584653022	0.0062762662495298	6	138	FFPE-ATAC in FFPE kidney
peak_118825	chrUn_random	5889482	5890052	12.2095510040727	-5.28931490868864	1.49842845071514	-3.52990822228733	0.000415703844493594	0.00634777316317288	3	237.5	FFPE-ATAC in FFPE kidney
peak_43729	chr16	3114789	3115286	12.2064632183717	-5.28907018532921	1.49840356556317	-3.52980352348624	0.000415868377361771	0.00634883173715588	2	210.5	FFPE-ATAC in FFPE kidney
peak_10590	chr10	57687300	57687540	10.0844579709539	-3.95945023417893	1.12275299713161	-3.52655503418335	0.000421003658064947	0.00639975082219208	2	81.5	FFPE-ATAC in FFPE kidney
peak_1343	chr1	43242689	43242974	5.64978896612834	-5.65649697747015	1.60569885402865	-3.522763289815	0.000427072609435394	0.00639975082219208	0	55	FFPE-ATAC in FFPE kidney
peak_7531	chr1	184599450	184599677	5.64978896612834	-5.65649697747015	1.60569885402865	-3.522763289815	0.000427072609435394	0.00639975082219208	0.5	44	FFPE-ATAC in FFPE kidney
peak_8614	chr10	8867911	8868268	5.64978896612834	-5.65649697747015	1.60569885402865	-3.522763289815	0.000427072609435394	0.00639975082219208	1	71	FFPE-ATAC in FFPE kidney
peak_9814	chr10	37856891	37857126	5.64978896612834	-5.65649697747015	1.60569885402865	-3.522763289815	0.000427072609435394	0.00639975082219208	0	47.5	FFPE-ATAC in FFPE kidney
peak_11084	chr10	64676702	64676916	5.64978896612834	-5.65649697747015	1.60569885402865	-3.522763289815	0.000427072609435394	0.00639975082219208	0	42	FFPE-ATAC in FFPE kidney
peak_12504	chr10	83162169	83162369	5.64978896612834	-5.65649697747015	1.60569885402865	-3.522763289815	0.000427072609435394	0.00639975082219208	0	39.5	FFPE-ATAC in FFPE kidney
peak_12937	chr10	90844464	90844685	5.64978896612834	-5.65649697747015	1.60569885402865	-3.522763289815	0.000427072609435394	0.00639975082219208	0.5	43.5	FFPE-ATAC in FFPE kidney
peak_24597	chr12	67984829	67985029	5.64978896612834	-5.65649697747015	1.60569885402865	-3.522763289815	0.000427072609435394	0.00639975082219208	0	38.5	FFPE-ATAC in FFPE kidney
peak_24814	chr12	72493332	72493704	5.64978896612834	-5.65649697747015	1.60569885402865	-3.522763289815	0.000427072609435394	0.00639975082219208	0	73	FFPE-ATAC in FFPE kidney
peak_25144	chr12	77280807	77281456	5.64978896612834	-5.65649697747015	1.60569885402865	-3.522763289815	0.000427072609435394	0.00639975082219208	2	128	FFPE-ATAC in FFPE kidney
peak_28126	chr13	16119390	16119752	5.64978896612834	-5.65649697747015	1.60569885402865	-3.522763289815	0.000427072609435394	0.00639975082219208	0	72	FFPE-ATAC in FFPE kidney
peak_30934	chr13	65687131	65687533	5.64978896612834	-5.65649697747015	1.60569885402865	-3.522763289815	0.000427072609435394	0.00639975082219208	0	80	FFPE-ATAC in FFPE kidney
peak_31557	chr13	89571456	89572027	5.64978896612834	-5.65649697747015	1.60569885402865	-3.522763289815	0.000427072609435394	0.00639975082219208	0.5	110.5	FFPE-ATAC in FFPE kidney
peak_34366	chr14	23916045	23916480	5.64978896612834	-5.65649697747015	1.60569885402865	-3.522763289815	0.000427072609435394	0.00639975082219208	0	87.5	FFPE-ATAC in FFPE kidney
peak_36318	chr14	60961202	60961563	5.64978896612834	-5.65649697747015	1.60569885402865	-3.522763289815	0.000427072609435394	0.00639975082219208	0	70	FFPE-ATAC in FFPE kidney
peak_38355	chr14	119352707	119353397	5.64978896612834	-5.65649697747015	1.60569885402865	-3.522763289815	0.000427072609435394	0.00639975082219208	1	136	FFPE-ATAC in FFPE kidney
peak_39380	chr15	23348825	23349028	5.64978896612834	-5.65649697747015	1.60569885402865	-3.522763289815	0.000427072609435394	0.00639975082219208	0	40	FFPE-ATAC in FFPE kidney
peak_42021	chr15	81030587	81031399	5.64978896612834	-5.65649697747015	1.60569885402865	-3.522763289815	0.000427072609435394	0.00639975082219208	2	162.5	FFPE-ATAC in FFPE kidney
peak_42133	chr15	82061617	82061980	5.64978896612834	-5.65649697747015	1.60569885402865	-3.522763289815	0.000427072609435394	0.00639975082219208	0.5	72	FFPE-ATAC in FFPE kidney
peak_47223	chr16	81161680	81161965	5.64978896612834	-5.65649697747015	1.60569885402865	-3.522763289815	0.000427072609435394	0.00639975082219208	0	57	FFPE-ATAC in FFPE kidney
peak_48501	chr17	7278601	7279455	5.64978896612834	-5.65649697747015	1.60569885402865	-3.522763289815	0.000427072609435394	0.00639975082219208	2	171.5	FFPE-ATAC in FFPE kidney
peak_51501	chr17	56993929	56994260	5.64978896612834	-5.65649697747015	1.60569885402865	-3.522763289815	0.000427072609435394	0.00639975082219208	0	65.5	FFPE-ATAC in FFPE kidney
peak_53248	chr17_random	27955	28658	5.64978896612834	-5.65649697747015	1.60569885402865	-3.522763289815	0.000427072609435394	0.00639975082219208	0	140	FFPE-ATAC in FFPE kidney
peak_53261	chr17_random	327732	328189	5.64978896612834	-5.65649697747015	1.60569885402865	-3.522763289815	0.000427072609435394	0.00639975082219208	0	92.5	FFPE-ATAC in FFPE kidney
peak_55428	chr18	54119593	54120661	5.64978896612834	-5.65649697747015	1.60569885402865	-3.522763289815	0.000427072609435394	0.00639975082219208	2	211	FFPE-ATAC in FFPE kidney
peak_55900	chr18	61928904	61929267	5.64978896612834	-5.65649697747015	1.60569885402865	-3.522763289815	0.000427072609435394	0.00639975082219208	1	70	FFPE-ATAC in FFPE kidney
peak_60218	chr19	53021096	53021317	5.64978896612834	-5.65649697747015	1.60569885402865	-3.522763289815	0.000427072609435394	0.00639975082219208	0	44.5	FFPE-ATAC in FFPE kidney
peak_60895	chr1_random	799763	800055	5.64978896612834	-5.65649697747015	1.60569885402865	-3.522763289815	0.000427072609435394	0.00639975082219208	0	57	FFPE-ATAC in FFPE kidney
peak_63926	chr2	61024635	61024843	5.64978896612834	-5.65649697747015	1.60569885402865	-3.522763289815	0.000427072609435394	0.00639975082219208	0	41	FFPE-ATAC in FFPE kidney
peak_70243	chr2	181664839	181665299	5.64978896612834	-5.65649697747015	1.60569885402865	-3.522763289815	0.000427072609435394	0.00639975082219208	1	89	FFPE-ATAC in FFPE kidney
peak_70311	chr3	7918380	7918703	5.64978896612834	-5.65649697747015	1.60569885402865	-3.522763289815	0.000427072609435394	0.00639975082219208	0.5	62.5	FFPE-ATAC in FFPE kidney
peak_77973	chr4	41854499	41855829	5.64978896612834	-5.65649697747015	1.60569885402865	-3.522763289815	0.000427072609435394	0.00639975082219208	0	271	FFPE-ATAC in FFPE kidney
peak_78399	chr4	48796585	48796797	5.64978896612834	-5.65649697747015	1.60569885402865	-3.522763289815	0.000427072609435394	0.00639975082219208	0	41.5	FFPE-ATAC in FFPE kidney
peak_81548	chr4	120048962	120049219	5.64978896612834	-5.65649697747015	1.60569885402865	-3.522763289815	0.000427072609435394	0.00639975082219208	0	51.5	FFPE-ATAC in FFPE kidney
peak_84832	chr5	13413618	13413818	5.64978896612834	-5.65649697747015	1.60569885402865	-3.522763289815	0.000427072609435394	0.00639975082219208	0	39	FFPE-ATAC in FFPE kidney
peak_84926	chr5	15221353	15221838	5.64978896612834	-5.65649697747015	1.60569885402865	-3.522763289815	0.000427072609435394	0.00639975082219208	1	94	FFPE-ATAC in FFPE kidney
peak_87669	chr5	83329116	83329316	5.64978896612834	-5.65649697747015	1.60569885402865	-3.522763289815	0.000427072609435394	0.00639975082219208	0	39	FFPE-ATAC in FFPE kidney
peak_88663	chr5	104568557	104568793	5.64978896612834	-5.65649697747015	1.60569885402865	-3.522763289815	0.000427072609435394	0.00639975082219208	0.5	46.5	FFPE-ATAC in FFPE kidney
peak_90609	chr5	133427440	133427739	5.64978896612834	-5.65649697747015	1.60569885402865	-3.522763289815	0.000427072609435394	0.00639975082219208	0	58.5	FFPE-ATAC in FFPE kidney
peak_94586	chr6	66244886	66245114	5.64978896612834	-5.65649697747015	1.60569885402865	-3.522763289815	0.000427072609435394	0.00639975082219208	0	46	FFPE-ATAC in FFPE kidney
peak_98795	chr6	147864374	147864690	5.64978896612834	-5.65649697747015	1.60569885402865	-3.522763289815	0.000427072609435394	0.00639975082219208	0	61.5	FFPE-ATAC in FFPE kidney
peak_101070	chr7	67048192	67048482	5.64978896612834	-5.65649697747015	1.60569885402865	-3.522763289815	0.000427072609435394	0.00639975082219208	0	57	FFPE-ATAC in FFPE kidney
peak_105207	chr7	142036760	142037243	5.64978896612834	-5.65649697747015	1.60569885402865	-3.522763289815	0.000427072609435394	0.00639975082219208	2	93	FFPE-ATAC in FFPE kidney
peak_107608	chr8	42380170	42380520	5.64978896612834	-5.65649697747015	1.60569885402865	-3.522763289815	0.000427072609435394	0.00639975082219208	1	69	FFPE-ATAC in FFPE kidney
peak_109173	chr8	83108609	83109025	5.64978896612834	-5.65649697747015	1.60569885402865	-3.522763289815	0.000427072609435394	0.00639975082219208	1	83	FFPE-ATAC in FFPE kidney
peak_110171	chr8	100397201	100397409	5.64978896612834	-5.65649697747015	1.60569885402865	-3.522763289815	0.000427072609435394	0.00639975082219208	0	42	FFPE-ATAC in FFPE kidney
peak_114622	chr9	57698415	57698632	5.64978896612834	-5.65649697747015	1.60569885402865	-3.522763289815	0.000427072609435394	0.00639975082219208	0	42.5	FFPE-ATAC in FFPE kidney
peak_115871	chr9	74427550	74427966	5.64978896612834	-5.65649697747015	1.60569885402865	-3.522763289815	0.000427072609435394	0.00639975082219208	0	83.5	FFPE-ATAC in FFPE kidney
peak_116559	chr9	94184034	94184377	5.64978896612834	-5.65649697747015	1.60569885402865	-3.522763289815	0.000427072609435394	0.00639975082219208	0	66	FFPE-ATAC in FFPE kidney
peak_117124	chr9	103681961	103682170	5.64978896612834	-5.65649697747015	1.60569885402865	-3.522763289815	0.000427072609435394	0.00639975082219208	0	41	FFPE-ATAC in FFPE kidney
peak_117725	chr9	113556740	113557282	5.64978896612834	-5.65649697747015	1.60569885402865	-3.522763289815	0.000427072609435394	0.00639975082219208	1	106.5	FFPE-ATAC in FFPE kidney
peak_1169	chr1	40307860	40308067	5.65287675182933	-5.65708085499363	1.60620762543394	-3.52201095637639	0.000428286442314719	0.00639975082219208	0	41	FFPE-ATAC in FFPE kidney
peak_1803	chr1	56065275	56065730	5.65287675182933	-5.65708085499363	1.60620762543394	-3.52201095637639	0.000428286442314719	0.00639975082219208	1	88.5	FFPE-ATAC in FFPE kidney
peak_3947	chr1	103057152	103057357	5.65287675182933	-5.65708085499363	1.60620762543394	-3.52201095637639	0.000428286442314719	0.00639975082219208	0	40.5	FFPE-ATAC in FFPE kidney
peak_4613	chr1	130517222	130517638	5.65287675182933	-5.65708085499363	1.60620762543394	-3.52201095637639	0.000428286442314719	0.00639975082219208	0.5	81.5	FFPE-ATAC in FFPE kidney
peak_7894	chr1	191806900	191807106	5.65287675182933	-5.65708085499363	1.60620762543394	-3.52201095637639	0.000428286442314719	0.00639975082219208	0	41	FFPE-ATAC in FFPE kidney
peak_8667	chr10	10843457	10843842	5.65287675182933	-5.65708085499363	1.60620762543394	-3.52201095637639	0.000428286442314719	0.00639975082219208	0	74.5	FFPE-ATAC in FFPE kidney
peak_9468	chr10	24817597	24817916	5.65287675182933	-5.65708085499363	1.60620762543394	-3.52201095637639	0.000428286442314719	0.00639975082219208	0	63.5	FFPE-ATAC in FFPE kidney
peak_10424	chr10	52249418	52249899	5.65287675182933	-5.65708085499363	1.60620762543394	-3.52201095637639	0.000428286442314719	0.00639975082219208	0	94	FFPE-ATAC in FFPE kidney
peak_14317	chr10	119343596	119343923	5.65287675182933	-5.65708085499363	1.60620762543394	-3.52201095637639	0.000428286442314719	0.00639975082219208	0	64	FFPE-ATAC in FFPE kidney
peak_15227	chr11	5069773	5070428	5.65287675182933	-5.65708085499363	1.60620762543394	-3.52201095637639	0.000428286442314719	0.00639975082219208	1	127.5	FFPE-ATAC in FFPE kidney
peak_16277	chr11	31889714	31890323	5.65287675182933	-5.65708085499363	1.60620762543394	-3.52201095637639	0.000428286442314719	0.00639975082219208	1	119.5	FFPE-ATAC in FFPE kidney
peak_19684	chr11	87741759	87742086	5.65287675182933	-5.65708085499363	1.60620762543394	-3.52201095637639	0.000428286442314719	0.00639975082219208	0	65.5	FFPE-ATAC in FFPE kidney
peak_21625	chr11	110693609	110694132	5.65287675182933	-5.65708085499363	1.60620762543394	-3.52201095637639	0.000428286442314719	0.00639975082219208	1	101.5	FFPE-ATAC in FFPE kidney
peak_22208	chr11	117861589	117861800	5.65287675182933	-5.65708085499363	1.60620762543394	-3.52201095637639	0.000428286442314719	0.00639975082219208	0	40	FFPE-ATAC in FFPE kidney
peak_25272	chr12	78433802	78434332	5.65287675182933	-5.65708085499363	1.60620762543394	-3.52201095637639	0.000428286442314719	0.00639975082219208	0	101.5	FFPE-ATAC in FFPE kidney
peak_25735	chr12	85101717	85102026	5.65287675182933	-5.65708085499363	1.60620762543394	-3.52201095637639	0.000428286442314719	0.00639975082219208	0	61	FFPE-ATAC in FFPE kidney
peak_26046	chr12	88476190	88476973	5.65287675182933	-5.65708085499363	1.60620762543394	-3.52201095637639	0.000428286442314719	0.00639975082219208	3	157	FFPE-ATAC in FFPE kidney
peak_31050	chr13	69373802	69374114	5.65287675182933	-5.65708085499363	1.60620762543394	-3.52201095637639	0.000428286442314719	0.00639975082219208	0	63	FFPE-ATAC in FFPE kidney
peak_35846	chr14	53639760	53640073	5.65287675182933	-5.65708085499363	1.60620762543394	-3.52201095637639	0.000428286442314719	0.00639975082219208	0	62	FFPE-ATAC in FFPE kidney
peak_37656	chr14	95623338	95623676	5.65287675182933	-5.65708085499363	1.60620762543394	-3.52201095637639	0.000428286442314719	0.00639975082219208	0	67.5	FFPE-ATAC in FFPE kidney
peak_37753	chr14	99866934	99867600	5.65287675182933	-5.65708085499363	1.60620762543394	-3.52201095637639	0.000428286442314719	0.00639975082219208	1	130	FFPE-ATAC in FFPE kidney
peak_38012	chr14	104811309	104811810	5.65287675182933	-5.65708085499363	1.60620762543394	-3.52201095637639	0.000428286442314719	0.00639975082219208	0	96.5	FFPE-ATAC in FFPE kidney
peak_39616	chr15	31105553	31106549	5.65287675182933	-5.65708085499363	1.60620762543394	-3.52201095637639	0.000428286442314719	0.00639975082219208	2.5	194.5	FFPE-ATAC in FFPE kidney
peak_40039	chr15	37412478	37412824	5.65287675182933	-5.65708085499363	1.60620762543394	-3.52201095637639	0.000428286442314719	0.00639975082219208	0	69	FFPE-ATAC in FFPE kidney
peak_42720	chr15	91122731	91123055	5.65287675182933	-5.65708085499363	1.60620762543394	-3.52201095637639	0.000428286442314719	0.00639975082219208	0	64	FFPE-ATAC in FFPE kidney
peak_42800	chr15	93298349	93299666	5.65287675182933	-5.65708085499363	1.60620762543394	-3.52201095637639	0.000428286442314719	0.00639975082219208	0	263.5	FFPE-ATAC in FFPE kidney
peak_45918	chr16	36659502	36659879	5.65287675182933	-5.65708085499363	1.60620762543394	-3.52201095637639	0.000428286442314719	0.00639975082219208	0	73	FFPE-ATAC in FFPE kidney
peak_47228	chr16	81317772	81318227	5.65287675182933	-5.65708085499363	1.60620762543394	-3.52201095637639	0.000428286442314719	0.00639975082219208	1.5	88	FFPE-ATAC in FFPE kidney
peak_48865	chr17	13560578	13560959	5.65287675182933	-5.65708085499363	1.60620762543394	-3.52201095637639	0.000428286442314719	0.00639975082219208	0	73	FFPE-ATAC in FFPE kidney
peak_50418	chr17	35605893	35606103	5.65287675182933	-5.65708085499363	1.60620762543394	-3.52201095637639	0.000428286442314719	0.00639975082219208	0	41	FFPE-ATAC in FFPE kidney
peak_55962	chr18	63050353	63050644	5.65287675182933	-5.65708085499363	1.60620762543394	-3.52201095637639	0.000428286442314719	0.00639975082219208	0	56.5	FFPE-ATAC in FFPE kidney
peak_60386	chr19	55236956	55237313	5.65287675182933	-5.65708085499363	1.60620762543394	-3.52201095637639	0.000428286442314719	0.00639975082219208	1	71	FFPE-ATAC in FFPE kidney
peak_60683	chr19	58393318	58393710	5.65287675182933	-5.65708085499363	1.60620762543394	-3.52201095637639	0.000428286442314719	0.00639975082219208	0	77.5	FFPE-ATAC in FFPE kidney
peak_60900	chr1_random	872920	873174	5.65287675182933	-5.65708085499363	1.60620762543394	-3.52201095637639	0.000428286442314719	0.00639975082219208	0	50	FFPE-ATAC in FFPE kidney
peak_63486	chr2	51503776	51504107	5.65287675182933	-5.65708085499363	1.60620762543394	-3.52201095637639	0.000428286442314719	0.00639975082219208	0	65	FFPE-ATAC in FFPE kidney
peak_63641	chr2	57772621	57772836	5.65287675182933	-5.65708085499363	1.60620762543394	-3.52201095637639	0.000428286442314719	0.00639975082219208	0	42	FFPE-ATAC in FFPE kidney
peak_66025	chr2	107577455	107577777	5.65287675182933	-5.65708085499363	1.60620762543394	-3.52201095637639	0.000428286442314719	0.00639975082219208	0	64.5	FFPE-ATAC in FFPE kidney
peak_66358	chr2	116977009	116977252	5.65287675182933	-5.65708085499363	1.60620762543394	-3.52201095637639	0.000428286442314719	0.00639975082219208	0	47.5	FFPE-ATAC in FFPE kidney
peak_66898	chr2	125591898	125592524	5.65287675182933	-5.65708085499363	1.60620762543394	-3.52201095637639	0.000428286442314719	0.00639975082219208	0	125	FFPE-ATAC in FFPE kidney
peak_71592	chr3	43954842	43955218	5.65287675182933	-5.65708085499363	1.60620762543394	-3.52201095637639	0.000428286442314719	0.00639975082219208	0	73	FFPE-ATAC in FFPE kidney
peak_74060	chr3	98353875	98354536	5.65287675182933	-5.65708085499363	1.60620762543394	-3.52201095637639	0.000428286442314719	0.00639975082219208	0	128	FFPE-ATAC in FFPE kidney
peak_76183	chr3	143891481	143892082	5.65287675182933	-5.65708085499363	1.60620762543394	-3.52201095637639	0.000428286442314719	0.00639975082219208	0	117.5	FFPE-ATAC in FFPE kidney
peak_79207	chr4	64008799	64009248	5.65287675182933	-5.65708085499363	1.60620762543394	-3.52201095637639	0.000428286442314719	0.00639975082219208	2	89.5	FFPE-ATAC in FFPE kidney
peak_80474	chr4	102943533	102944498	5.65287675182933	-5.65708085499363	1.60620762543394	-3.52201095637639	0.000428286442314719	0.00639975082219208	0	190.5	FFPE-ATAC in FFPE kidney
peak_81013	chr4	111111581	111112020	5.65287675182933	-5.65708085499363	1.60620762543394	-3.52201095637639	0.000428286442314719	0.00639975082219208	2	85.5	FFPE-ATAC in FFPE kidney
peak_81919	chr4	126986144	126986512	5.65287675182933	-5.65708085499363	1.60620762543394	-3.52201095637639	0.000428286442314719	0.00639975082219208	1	72	FFPE-ATAC in FFPE kidney
peak_85016	chr5	17823004	17823539	5.65287675182933	-5.65708085499363	1.60620762543394	-3.52201095637639	0.000428286442314719	0.00639975082219208	0.5	107.5	FFPE-ATAC in FFPE kidney
peak_85414	chr5	27744390	27744855	5.65287675182933	-5.65708085499363	1.60620762543394	-3.52201095637639	0.000428286442314719	0.00639975082219208	0	92.5	FFPE-ATAC in FFPE kidney
peak_85458	chr5	29116745	29117208	5.65287675182933	-5.65708085499363	1.60620762543394	-3.52201095637639	0.000428286442314719	0.00639975082219208	0	90.5	FFPE-ATAC in FFPE kidney
peak_88319	chr5	99958115	99958330	5.65287675182933	-5.65708085499363	1.60620762543394	-3.52201095637639	0.000428286442314719	0.00639975082219208	0	42	FFPE-ATAC in FFPE kidney
peak_88650	chr5	104489981	104490282	5.65287675182933	-5.65708085499363	1.60620762543394	-3.52201095637639	0.000428286442314719	0.00639975082219208	0	58	FFPE-ATAC in FFPE kidney
peak_89613	chr5	117879458	117879670	5.65287675182933	-5.65708085499363	1.60620762543394	-3.52201095637639	0.000428286442314719	0.00639975082219208	0	41	FFPE-ATAC in FFPE kidney
peak_92361	chr6	12109394	12109885	5.65287675182933	-5.65708085499363	1.60620762543394	-3.52201095637639	0.000428286442314719	0.00639975082219208	1	96.5	FFPE-ATAC in FFPE kidney
peak_92386	chr6	12951862	12952205	5.65287675182933	-5.65708085499363	1.60620762543394	-3.52201095637639	0.000428286442314719	0.00639975082219208	1	68.5	FFPE-ATAC in FFPE kidney
peak_92796	chr6	27203597	27203799	5.65287675182933	-5.65708085499363	1.60620762543394	-3.52201095637639	0.000428286442314719	0.00639975082219208	0	39	FFPE-ATAC in FFPE kidney
peak_93310	chr6	36872243	36872633	5.65287675182933	-5.65708085499363	1.60620762543394	-3.52201095637639	0.000428286442314719	0.00639975082219208	0	75.5	FFPE-ATAC in FFPE kidney
peak_94553	chr6	64280190	64280390	5.65287675182933	-5.65708085499363	1.60620762543394	-3.52201095637639	0.000428286442314719	0.00639975082219208	0	39	FFPE-ATAC in FFPE kidney
peak_97551	chr6	126732663	126733103	5.65287675182933	-5.65708085499363	1.60620762543394	-3.52201095637639	0.000428286442314719	0.00639975082219208	2	85.5	FFPE-ATAC in FFPE kidney
peak_101284	chr7	73895822	73896050	5.65287675182933	-5.65708085499363	1.60620762543394	-3.52201095637639	0.000428286442314719	0.00639975082219208	0.5	44.5	FFPE-ATAC in FFPE kidney
peak_102842	chr7	105153231	105153437	5.65287675182933	-5.65708085499363	1.60620762543394	-3.52201095637639	0.000428286442314719	0.00639975082219208	0	39	FFPE-ATAC in FFPE kidney
peak_104972	chr7	138945822	138946351	5.65287675182933	-5.65708085499363	1.60620762543394	-3.52201095637639	0.000428286442314719	0.00639975082219208	1	103	FFPE-ATAC in FFPE kidney
peak_105612	chr7	148953550	148954261	5.65287675182933	-5.65708085499363	1.60620762543394	-3.52201095637639	0.000428286442314719	0.00639975082219208	1	142	FFPE-ATAC in FFPE kidney
peak_106483	chr8	14948788	14948988	5.65287675182933	-5.65708085499363	1.60620762543394	-3.52201095637639	0.000428286442314719	0.00639975082219208	0.5	39.5	FFPE-ATAC in FFPE kidney
peak_116452	chr9	88821039	88821392	5.65287675182933	-5.65708085499363	1.60620762543394	-3.52201095637639	0.000428286442314719	0.00639975082219208	1	69.5	FFPE-ATAC in FFPE kidney
peak_118560	chr9	123700794	123701243	5.65287675182933	-5.65708085499363	1.60620762543394	-3.52201095637639	0.000428286442314719	0.00639975082219208	1	88.5	FFPE-ATAC in FFPE kidney
peak_118565	chr9	123782099	123782434	5.65287675182933	-5.65708085499363	1.60620762543394	-3.52201095637639	0.000428286442314719	0.00639975082219208	1	65	FFPE-ATAC in FFPE kidney
peak_118570	chr9	123910731	123911121	5.65287675182933	-5.65708085499363	1.60620762543394	-3.52201095637639	0.000428286442314719	0.00639975082219208	1	74	FFPE-ATAC in FFPE kidney
peak_119794	chrX	66770642	66770844	5.65287675182933	-5.65708085499363	1.60620762543394	-3.52201095637639	0.000428286442314719	0.00639975082219208	0	39.5	FFPE-ATAC in FFPE kidney
peak_120492	chrX	102918998	102919268	5.65287675182933	-5.65708085499363	1.60620762543394	-3.52201095637639	0.000428286442314719	0.00639975082219208	0.5	54	FFPE-ATAC in FFPE kidney
peak_121516	chrY_random	12036126	12036330	5.65287675182933	-5.65708085499363	1.60620762543394	-3.52201095637639	0.000428286442314719	0.00639975082219208	0	40.5	FFPE-ATAC in FFPE kidney
peak_121519	chrY_random	12514439	12514643	5.65287675182933	-5.65708085499363	1.60620762543394	-3.52201095637639	0.000428286442314719	0.00639975082219208	0	40	FFPE-ATAC in FFPE kidney
peak_121528	chrY_random	24161443	24161644	5.65287675182933	-5.65708085499363	1.60620762543394	-3.52201095637639	0.000428286442314719	0.00639975082219208	0	40	FFPE-ATAC in FFPE kidney
peak_121530	chrY_random	27352234	27352561	5.65287675182933	-5.65708085499363	1.60620762543394	-3.52201095637639	0.000428286442314719	0.00639975082219208	0	62.5	FFPE-ATAC in FFPE kidney
peak_121537	chrY_random	33859454	33859662	5.65287675182933	-5.65708085499363	1.60620762543394	-3.52201095637639	0.000428286442314719	0.00639975082219208	0	41.5	FFPE-ATAC in FFPE kidney
peak_121548	chrY_random	42289687	42289891	5.65287675182933	-5.65708085499363	1.60620762543394	-3.52201095637639	0.000428286442314719	0.00639975082219208	0	40	FFPE-ATAC in FFPE kidney
peak_121557	chrY_random	49633832	49634032	5.65287675182933	-5.65708085499363	1.60620762543394	-3.52201095637639	0.000428286442314719	0.00639975082219208	0	39	FFPE-ATAC in FFPE kidney
peak_685	chr1	28200964	28201186	5.64670118042734	-5.65591318529238	1.60613233378366	-3.52144905268697	0.000429195131793216	0.00639975082219208	0	43.5	FFPE-ATAC in FFPE kidney
peak_9315	chr10	22078080	22078301	5.64670118042734	-5.65591318529238	1.60613233378366	-3.52144905268697	0.000429195131793216	0.00639975082219208	0	43.5	FFPE-ATAC in FFPE kidney
peak_15518	chr11	9878322	9878831	5.64670118042734	-5.65591318529238	1.60613233378366	-3.52144905268697	0.000429195131793216	0.00639975082219208	1	102	FFPE-ATAC in FFPE kidney
peak_25214	chr12	77882998	77883204	5.64670118042734	-5.65591318529238	1.60613233378366	-3.52144905268697	0.000429195131793216	0.00639975082219208	0	41	FFPE-ATAC in FFPE kidney
peak_29010	chr13	36224269	36224620	5.64670118042734	-5.65591318529238	1.60613233378366	-3.52144905268697	0.000429195131793216	0.00639975082219208	1	69.5	FFPE-ATAC in FFPE kidney
peak_31339	chr13	75900795	75900998	5.64670118042734	-5.65591318529238	1.60613233378366	-3.52144905268697	0.000429195131793216	0.00639975082219208	0	40	FFPE-ATAC in FFPE kidney
peak_41729	chr15	78349285	78349504	5.64670118042734	-5.65591318529238	1.60613233378366	-3.52144905268697	0.000429195131793216	0.00639975082219208	0.5	44	FFPE-ATAC in FFPE kidney
peak_43604	chr15	102221614	102221927	5.64670118042734	-5.65591318529238	1.60613233378366	-3.52144905268697	0.000429195131793216	0.00639975082219208	0	63	FFPE-ATAC in FFPE kidney
peak_44295	chr16	13657734	13658441	5.64670118042734	-5.65591318529238	1.60613233378366	-3.52144905268697	0.000429195131793216	0.00639975082219208	2.5	138.5	FFPE-ATAC in FFPE kidney
peak_46970	chr16	71819989	71820417	5.64670118042734	-5.65591318529238	1.60613233378366	-3.52144905268697	0.000429195131793216	0.00639975082219208	0	84.5	FFPE-ATAC in FFPE kidney
peak_48524	chr17	8137913	8139491	5.64670118042734	-5.65591318529238	1.60613233378366	-3.52144905268697	0.000429195131793216	0.00639975082219208	0	311	FFPE-ATAC in FFPE kidney
peak_53257	chr17_random	302896	303196	5.64670118042734	-5.65591318529238	1.60613233378366	-3.52144905268697	0.000429195131793216	0.00639975082219208	0	61.5	FFPE-ATAC in FFPE kidney
peak_71754	chr3	51706871	51707162	5.64670118042734	-5.65591318529238	1.60613233378366	-3.52144905268697	0.000429195131793216	0.00639975082219208	0.5	58	FFPE-ATAC in FFPE kidney
peak_76372	chr3	146140876	146141108	5.64670118042734	-5.65591318529238	1.60613233378366	-3.52144905268697	0.000429195131793216	0.00639975082219208	0	45.5	FFPE-ATAC in FFPE kidney
peak_81535	chr4	119892918	119893264	5.64670118042734	-5.65591318529238	1.60613233378366	-3.52144905268697	0.000429195131793216	0.00639975082219208	1	67.5	FFPE-ATAC in FFPE kidney
peak_82513	chr4	133445417	133445784	5.64670118042734	-5.65591318529238	1.60613233378366	-3.52144905268697	0.000429195131793216	0.00639975082219208	0	72.5	FFPE-ATAC in FFPE kidney
peak_82544	chr4	133814733	133815094	5.64670118042734	-5.65591318529238	1.60613233378366	-3.52144905268697	0.000429195131793216	0.00639975082219208	1.5	72.5	FFPE-ATAC in FFPE kidney
peak_83606	chr4	145586677	145587563	5.64670118042734	-5.65591318529238	1.60613233378366	-3.52144905268697	0.000429195131793216	0.00639975082219208	1	179	FFPE-ATAC in FFPE kidney
peak_86745	chr5	61893952	61894606	5.64670118042734	-5.65591318529238	1.60613233378366	-3.52144905268697	0.000429195131793216	0.00639975082219208	0	131	FFPE-ATAC in FFPE kidney
peak_91401	chr5	143565178	143565547	5.64670118042734	-5.65591318529238	1.60613233378366	-3.52144905268697	0.000429195131793216	0.00639975082219208	0	73	FFPE-ATAC in FFPE kidney
peak_100101	chr7	31977021	31977339	5.64670118042734	-5.65591318529238	1.60613233378366	-3.52144905268697	0.000429195131793216	0.00639975082219208	0	62.5	FFPE-ATAC in FFPE kidney
peak_101058	chr7	67002426	67002634	5.64670118042734	-5.65591318529238	1.60613233378366	-3.52144905268697	0.000429195131793216	0.00639975082219208	0	41.5	FFPE-ATAC in FFPE kidney
peak_104383	chr7	129424852	129425055	5.64670118042734	-5.65591318529238	1.60613233378366	-3.52144905268697	0.000429195131793216	0.00639975082219208	0	39.5	FFPE-ATAC in FFPE kidney
peak_108558	chr8	72085782	72086397	5.64670118042734	-5.65591318529238	1.60613233378366	-3.52144905268697	0.000429195131793216	0.00639975082219208	1	123.5	FFPE-ATAC in FFPE kidney
peak_118619	chrUn_random	2518248	2519379	5.64670118042734	-5.65591318529238	1.60613233378366	-3.52144905268697	0.000429195131793216	0.00639975082219208	0	223.5	FFPE-ATAC in FFPE kidney
peak_118647	chrUn_random	3580804	3581419	5.64670118042734	-5.65591318529238	1.60613233378366	-3.52144905268697	0.000429195131793216	0.00639975082219208	0.5	123	FFPE-ATAC in FFPE kidney
peak_118850	chrX	4770773	4770973	5.64670118042734	-5.65591318529238	1.60613233378366	-3.52144905268697	0.000429195131793216	0.00639975082219208	0	40.5	FFPE-ATAC in FFPE kidney
peak_120950	chrX	145312246	145312446	5.64670118042734	-5.65591318529238	1.60613233378366	-3.52144905268697	0.000429195131793216	0.00639975082219208	0	39.5	FFPE-ATAC in FFPE kidney
peak_1078	chr1	39411449	39411796	5.65596453753033	-5.65766804740768	1.60766673520529	-3.51917964309017	0.000432883482979764	0.00642292783167972	1	67	FFPE-ATAC in FFPE kidney
peak_8127	chr1	194496979	194497586	5.65596453753033	-5.65766804740768	1.60766673520529	-3.51917964309017	0.000432883482979764	0.00642292783167972	2	118	FFPE-ATAC in FFPE kidney
peak_27355	chr12	116302479	116302790	5.65596453753033	-5.65766804740768	1.60766673520529	-3.51917964309017	0.000432883482979764	0.00642292783167972	0	59	FFPE-ATAC in FFPE kidney
peak_29353	chr13	42216091	42216361	5.65596453753033	-5.65766804740768	1.60766673520529	-3.51917964309017	0.000432883482979764	0.00642292783167972	0	52	FFPE-ATAC in FFPE kidney
peak_33980	chr14	18691816	18692034	5.65596453753033	-5.65766804740768	1.60766673520529	-3.51917964309017	0.000432883482979764	0.00642292783167972	0.5	42	FFPE-ATAC in FFPE kidney
peak_35315	chr14	42564078	42564431	5.65596453753033	-5.65766804740768	1.60766673520529	-3.51917964309017	0.000432883482979764	0.00642292783167972	0	70	FFPE-ATAC in FFPE kidney
peak_38208	chr14	116899901	116900424	5.65596453753033	-5.65766804740768	1.60766673520529	-3.51917964309017	0.000432883482979764	0.00642292783167972	1	102.5	FFPE-ATAC in FFPE kidney
peak_39205	chr15	11358546	11359173	5.65596453753033	-5.65766804740768	1.60766673520529	-3.51917964309017	0.000432883482979764	0.00642292783167972	1	122.5	FFPE-ATAC in FFPE kidney
peak_44033	chr16	9548439	9548689	5.65596453753033	-5.65766804740768	1.60766673520529	-3.51917964309017	0.000432883482979764	0.00642292783167972	0	49	FFPE-ATAC in FFPE kidney
peak_46937	chr16	67205291	67205663	5.65596453753033	-5.65766804740768	1.60766673520529	-3.51917964309017	0.000432883482979764	0.00642292783167972	0	71.5	FFPE-ATAC in FFPE kidney
peak_47229	chr16	81575758	81575961	5.65596453753033	-5.65766804740768	1.60766673520529	-3.51917964309017	0.000432883482979764	0.00642292783167972	0.5	39.5	FFPE-ATAC in FFPE kidney
peak_49376	chr17	25755118	25755495	5.65596453753033	-5.65766804740768	1.60766673520529	-3.51917964309017	0.000432883482979764	0.00642292783167972	0	73.5	FFPE-ATAC in FFPE kidney
peak_50480	chr17	36024558	36024760	5.65596453753033	-5.65766804740768	1.60766673520529	-3.51917964309017	0.000432883482979764	0.00642292783167972	0	38	FFPE-ATAC in FFPE kidney
peak_52498	chr17	80520671	80521130	5.65596453753033	-5.65766804740768	1.60766673520529	-3.51917964309017	0.000432883482979764	0.00642292783167972	2	91	FFPE-ATAC in FFPE kidney
peak_60192	chr19	49225257	49225585	5.65596453753033	-5.65766804740768	1.60766673520529	-3.51917964309017	0.000432883482979764	0.00642292783167972	1.5	64.5	FFPE-ATAC in FFPE kidney
peak_63491	chr2	51695513	51695912	5.65596453753033	-5.65766804740768	1.60766673520529	-3.51917964309017	0.000432883482979764	0.00642292783167972	1	77.5	FFPE-ATAC in FFPE kidney
peak_67025	chr2	127284329	127284558	5.65596453753033	-5.65766804740768	1.60766673520529	-3.51917964309017	0.000432883482979764	0.00642292783167972	0	45	FFPE-ATAC in FFPE kidney
peak_79019	chr4	61208453	61208655	5.65596453753033	-5.65766804740768	1.60766673520529	-3.51917964309017	0.000432883482979764	0.00642292783167972	0	38	FFPE-ATAC in FFPE kidney
peak_83131	chr4	138919093	138919438	5.65596453753033	-5.65766804740768	1.60766673520529	-3.51917964309017	0.000432883482979764	0.00642292783167972	0	67.5	FFPE-ATAC in FFPE kidney
peak_84721	chr5	7521956	7522295	5.65596453753033	-5.65766804740768	1.60766673520529	-3.51917964309017	0.000432883482979764	0.00642292783167972	1	66.5	FFPE-ATAC in FFPE kidney
peak_88423	chr5	101426655	101426986	5.65596453753033	-5.65766804740768	1.60766673520529	-3.51917964309017	0.000432883482979764	0.00642292783167972	0	63	FFPE-ATAC in FFPE kidney
peak_89647	chr5	118349772	118350195	5.65596453753033	-5.65766804740768	1.60766673520529	-3.51917964309017	0.000432883482979764	0.00642292783167972	0.5	81.5	FFPE-ATAC in FFPE kidney
peak_92608	chr6	19886773	19887051	5.65596453753033	-5.65766804740768	1.60766673520529	-3.51917964309017	0.000432883482979764	0.00642292783167972	0	55	FFPE-ATAC in FFPE kidney
peak_107980	chr8	51538843	51539055	5.65596453753033	-5.65766804740768	1.60766673520529	-3.51917964309017	0.000432883482979764	0.00642292783167972	0	41.5	FFPE-ATAC in FFPE kidney
peak_108139	chr8	61827010	61827339	5.65596453753033	-5.65766804740768	1.60766673520529	-3.51917964309017	0.000432883482979764	0.00642292783167972	1	64	FFPE-ATAC in FFPE kidney
peak_114970	chr9	62340583	62340904	5.65596453753033	-5.65766804740768	1.60766673520529	-3.51917964309017	0.000432883482979764	0.00642292783167972	0	62	FFPE-ATAC in FFPE kidney
peak_116916	chr9	100324559	100324813	5.65596453753033	-5.65766804740768	1.60766673520529	-3.51917964309017	0.000432883482979764	0.00642292783167972	0	49.5	FFPE-ATAC in FFPE kidney
peak_117747	chr9	114037502	114037844	5.65596453753033	-5.65766804740768	1.60766673520529	-3.51917964309017	0.000432883482979764	0.00642292783167972	0	68	FFPE-ATAC in FFPE kidney
peak_117984	chr9	117090584	117090821	5.65596453753033	-5.65766804740768	1.60766673520529	-3.51917964309017	0.000432883482979764	0.00642292783167972	0	46	FFPE-ATAC in FFPE kidney
peak_119061	chrX	11302923	11303131	5.65596453753033	-5.65766804740768	1.60766673520529	-3.51917964309017	0.000432883482979764	0.00642292783167972	0	41.5	FFPE-ATAC in FFPE kidney
peak_119184	chrX	14941266	14941537	5.65596453753033	-5.65766804740768	1.60766673520529	-3.51917964309017	0.000432883482979764	0.00642292783167972	0	53.5	FFPE-ATAC in FFPE kidney
peak_121238	chrX	159252885	159253113	5.65596453753033	-5.65766804740768	1.60766673520529	-3.51917964309017	0.000432883482979764	0.00642292783167972	0	43	FFPE-ATAC in FFPE kidney
peak_121538	chrY_random	34031473	34031676	5.65596453753033	-5.65766804740768	1.60766673520529	-3.51917964309017	0.000432883482979764	0.00642292783167972	0	38.5	FFPE-ATAC in FFPE kidney
peak_121540	chrY_random	36066224	36066552	5.65596453753033	-5.65766804740768	1.60766673520529	-3.51917964309017	0.000432883482979764	0.00642292783167972	0	62	FFPE-ATAC in FFPE kidney
peak_9190	chr10	20680141	20680361	5.64361339472635	-5.65532623999391	1.60751722418706	-3.51805016761414	0.00043473016855188	0.00644167945024876	0	44.5	FFPE-ATAC in FFPE kidney
peak_27414	chr12	117041162	117041429	5.64361339472635	-5.65532623999391	1.60751722418706	-3.51805016761414	0.00043473016855188	0.00644167945024876	0	53.5	FFPE-ATAC in FFPE kidney
peak_27599	chr12	120501825	120502656	5.64361339472635	-5.65532623999391	1.60751722418706	-3.51805016761414	0.00043473016855188	0.00644167945024876	0	169.5	FFPE-ATAC in FFPE kidney
peak_54161	chr18	24459746	24460018	5.64361339472635	-5.65532623999391	1.60751722418706	-3.51805016761414	0.00043473016855188	0.00644167945024876	0	55.5	FFPE-ATAC in FFPE kidney
peak_94142	chr6	53169657	53170106	5.64361339472635	-5.65532623999391	1.60751722418706	-3.51805016761414	0.00043473016855188	0.00644167945024876	0.5	92	FFPE-ATAC in FFPE kidney
peak_98000	chr6	136272685	136272959	5.64361339472635	-5.65532623999391	1.60751722418706	-3.51805016761414	0.00043473016855188	0.00644167945024876	0	55	FFPE-ATAC in FFPE kidney
peak_49438	chr17	26234783	26235155	10.1938308948532	-3.34529403616035	0.951269962989457	-3.51666105975579	0.000437011436250544	0.0064686589873087	5.5	120	FFPE-ATAC in FFPE kidney
peak_56484	chr18	70772672	70773055	10.1938308948532	-3.34529403616035	0.951269962989457	-3.51666105975579	0.000437011436250544	0.0064686589873087	5.5	124	FFPE-ATAC in FFPE kidney
peak_110367	chr8	108116855	108117258	10.196581690426	-3.34483039789602	0.951141147096648	-3.51664987694633	0.000437029846523365	0.0064686589873087	5	132	FFPE-ATAC in FFPE kidney
[truncated: 2,428 more rows]

## Sheet: README
Supplemental Table S8: List of differential accessible chromatin peaks between standard ATAC-Seq on FFPE mouse kidney and FFPE-ATAC on FFPE mouse kidney.
